# Supplementary material for: A combinatorial approach of comprehensive QTL-based comparative genome mapping and transcript profiling identified a seed weight-regulating candidate gene in chickpea
Source: PubMed Central journal article supplement (PMC4365403; doi:10.1038/srep09264), 2015-03-19
Supplement: srep09264-s1.pdf [file srep09264-s1.pdf]

**A combinatorial approach of comprehensive QTL-based comparative genome mapping and transcript profiling identified a seed weight-regulating candidate gene in chickpea**

**Deepak Bajaj<sup>1</sup>, Hari D. Upadhyaya<sup>2</sup>, Yusuf Khan<sup>1</sup>, Shouvik Das<sup>1</sup>, Saurabh Badoni<sup>1</sup>, Tanima Shree<sup>1</sup>, Vinod Kumar<sup>3</sup>, Shailesh Tripathi<sup>4</sup>, C.L.L. Gowda<sup>2</sup>, Sube Singh<sup>2</sup>, Shivali Sharma<sup>2</sup>, Akhilesh K. Tyagi<sup>1</sup>, Debasis Chattopdhyay<sup>1</sup>, Swarup K. Parida<sup>1\*</sup>**

<sup>1</sup>National Institute of Plant Genome Research (NIPGR), Aruna Asaf Ali Marg, New Delhi 110067, India

<sup>2</sup>International Crops Research Institute for the Semi-Arid Tropics (ICRISAT), Patancheru 502324, Andhra Pradesh, India

<sup>3</sup>National Research Centre on Plant Biotechnology (NRCPB), New Delhi 110012, India

<sup>4</sup>Division of Genetics, Indian Agricultural Research Institute (IARI), New Delhi 110012, India

\*Corresponding author

2012

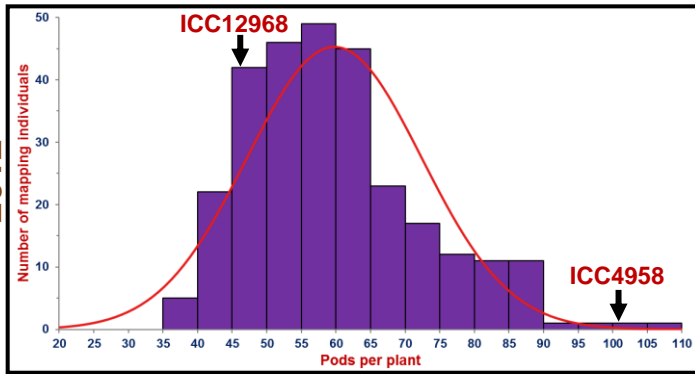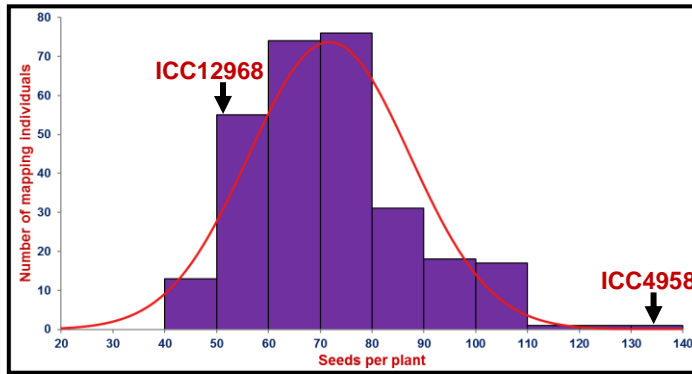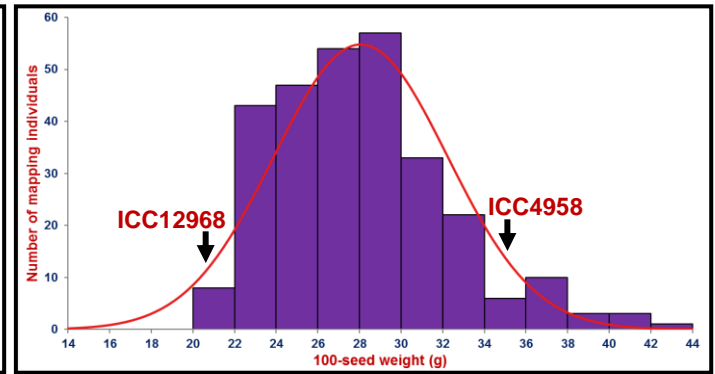

2013

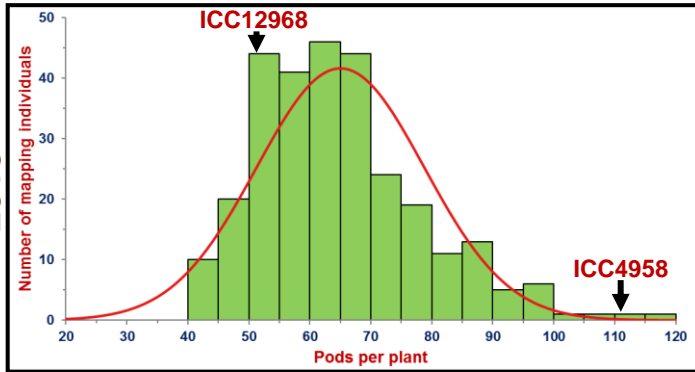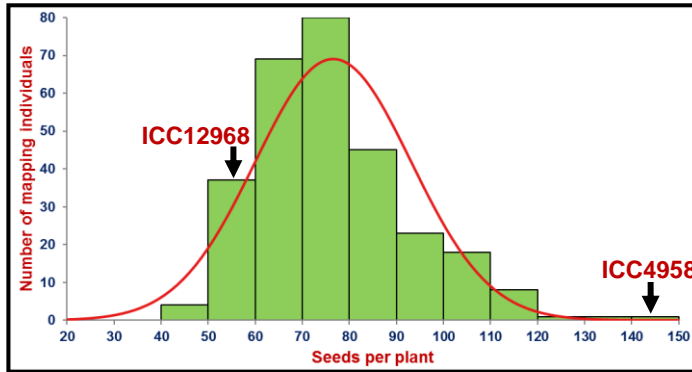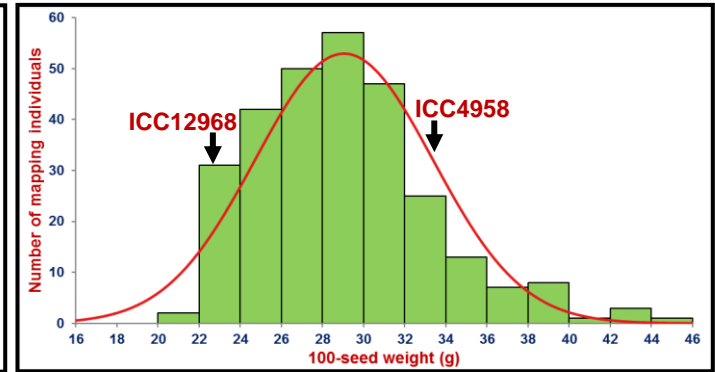

**Supplementary Fig. S1:** Frequency distribution of three quantitative agronomic traits, pod number per plant (PN), seed number per plant (SN) and 100-seed weight (SW) in 190 F<sub>4</sub> mapping individuals (ICC 4958 x ICC 12968) and parental chickpea genotypes across two experimental years (2012 and 2013) depicted a goodness of fit to the normal distribution.

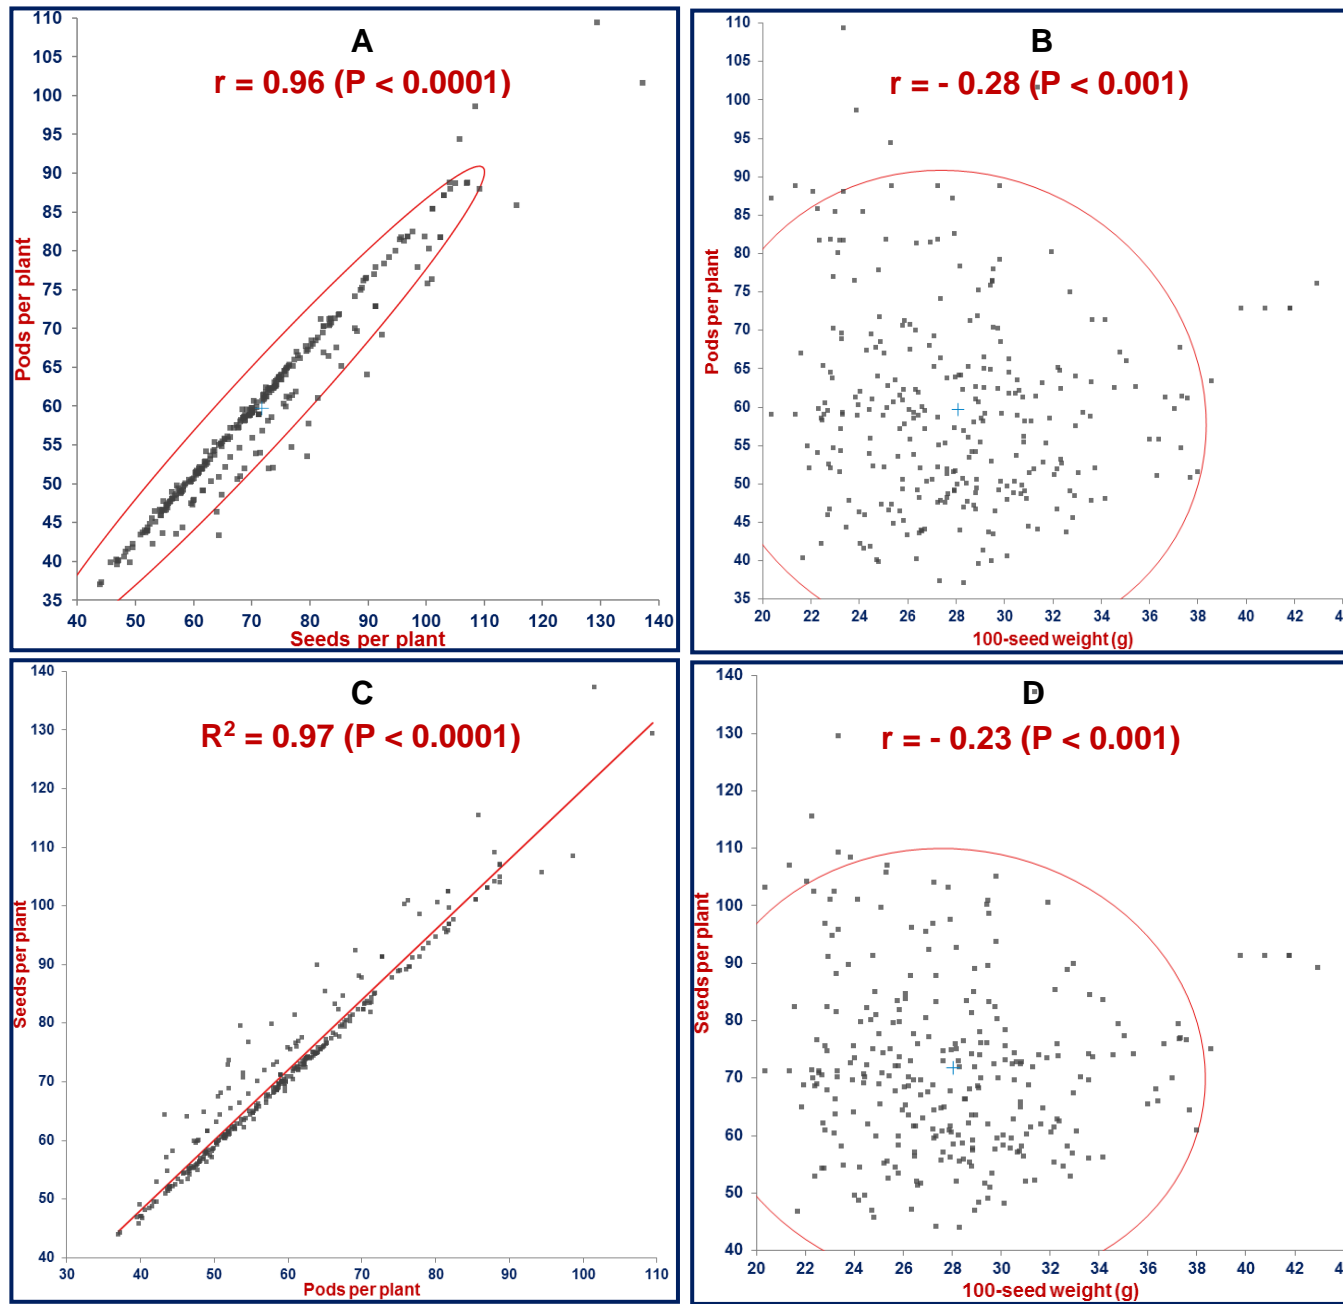

**Supplementary Fig. S2:** Pearson's correlation coefficients estimated among three quantitative agronomic traits (PN, SN and SW) in a mapping population (ICC 4958 x ICC 12968).

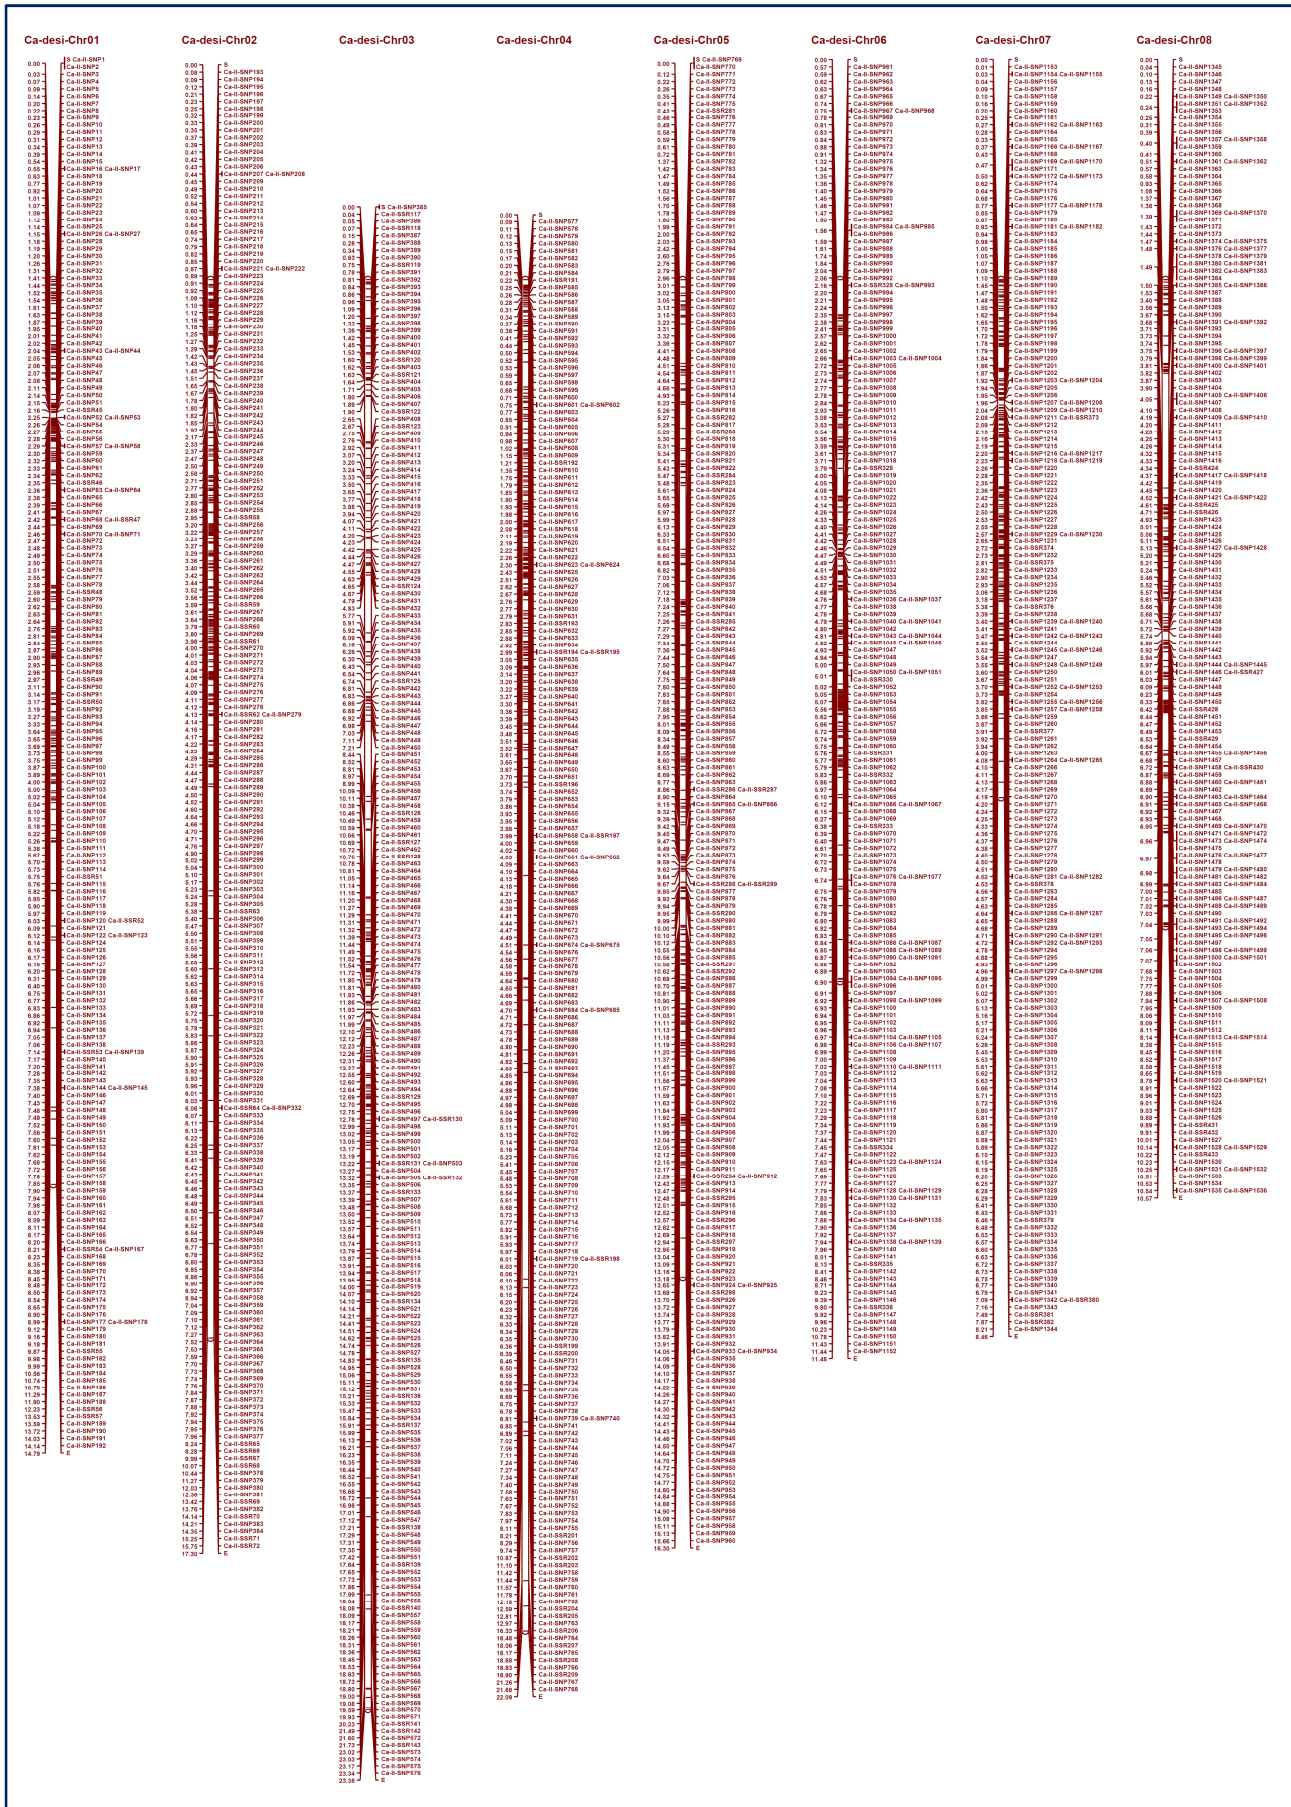

**Supplementary Fig. S3:** A physical map of *desi* chickpea constructed using 2008 markers (including genetic and genomic 1536 SNP and 472 SSR markers) showing their genome-wide physical distribution over eight chickpea chromosomes. The physical distance (Mb) and identity of the marker loci integrated on the eight chromosomes are indicated on the left and right side of the chromosomes, respectively. The identity of markers mentioned on the right side of chromosomes that corresponds to the marker IDs “Ca-IISNP” and “Ca-II-SSR” as mentioned details in the Supplementary Table S1. The size of the chromosomes (Mb) is based on the draft genome sequence (Pseudomolecule V1.1) of *desi* chickpea (Jain et al.<sup>47</sup>).

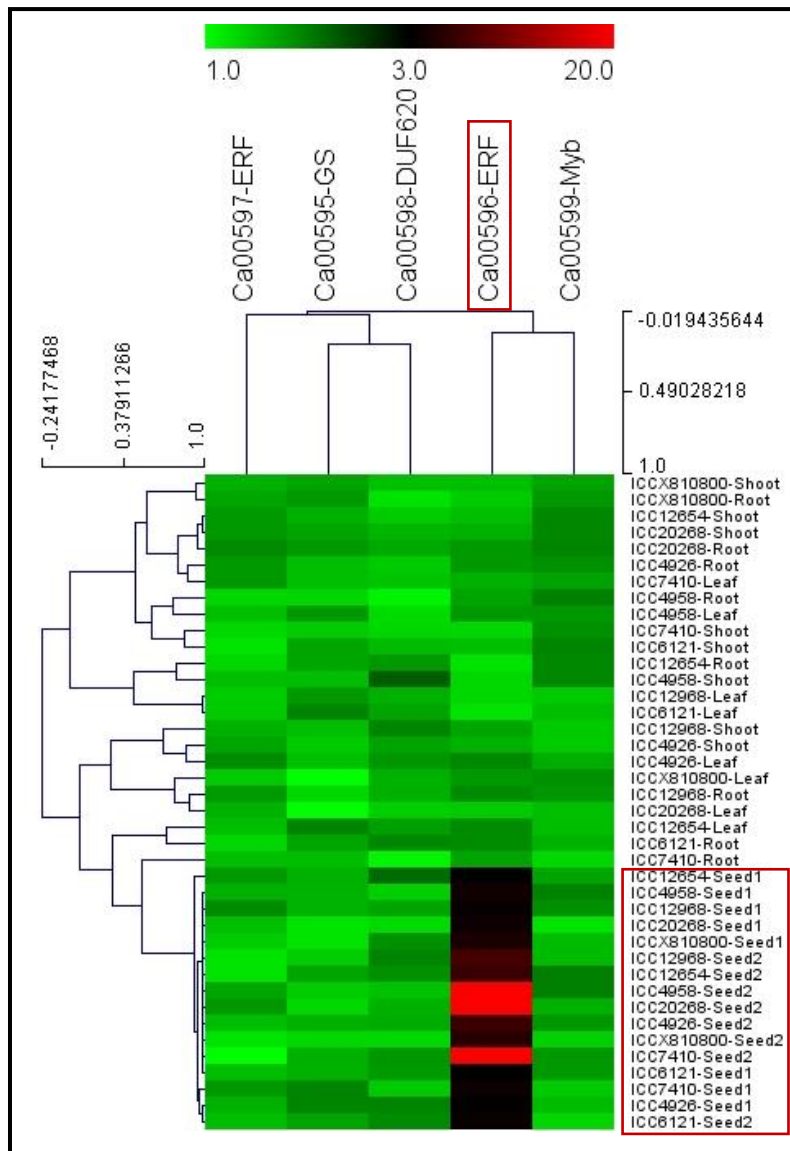

**Supplementary Fig. S4:** Hierarchical cluster display illustrated the differential expression profiles of five selected *desi* genes underlying a major SW-associated QTL (*CaqSW1.1*) exhibiting pronounced seed-specific expression at two seed developmental stages (S1 and S2: Seed development stages 1 and 2 occurring at 10-20 and 21-30 days after podding, respectively) compared to vegetative (shoot, root and leaf) tissues of eight low (ICC 12968, ICCX-810800, ICC 4926 and ICC 12654: 100 seed weight 8.9-20.8 g) and high (ICC 4958, ICC 20268, ICC 7410 and ICC 6121: 30.7-47.0 g) seed weight contrasting chickpea genotypes as well as parents of mapping population. The colour scale with green, black and red colours at the top signifies the low, medium and high average log signal expression values of the genes, respectively. The genes and tissues/seed developmental stages of the chickpea genotypes and mapping parents used for the expression profiling are mentioned on the top and right sides of the expression map, respectively. Details on the genes are provided in the Fig. 5. The endogenous control elongation factor-1 alpha was used in quantitative RT-PCR assay for normalization of gene expression values across different tissues/developmental stages of genotypes used. One seed-specific *ERF* TF gene revealing a higher differential up-regulation in eight chickpea accessions during seed development are indicated with red boxes.

**Supplementary Table S1: Summary of SNP and SSR markers mapped on an intra-specific chickpea genetic linkage map (ICC 4958 x ICC 12968)**

| Marker IDs | Genetic positions (cM) | Chromosomes      | Physical positions (bp) | Flanking sequences/Forward primers                                                                     | ICC 12968 | ICC4958 | Flanking sequences/Reverse primers                                                                       | Annealing temperature (0C) | Amplified Product size (bp) |
|------------|------------------------|------------------|-------------------------|--------------------------------------------------------------------------------------------------------|-----------|---------|----------------------------------------------------------------------------------------------------------|----------------------------|-----------------------------|
| Ca-II-SNP1 | 0.00                   | Ca-desi-LG(Chr)1 | 262                     | TTTTGAGATACTTGAGTATGATCGAAAATATTGATCTTTTGCTTGGTGCTGATTGTTGTGTTTTGTTCTTCAACTTGACGCTGCATTTATAGACTCCAAG   | A         | G       | TTGATGCAGCTCATCAATCTTGCTTTTGGCAGAACTTATCCAACAACCTTTTATGACAGTTGGTCCTTTCCAACCTGACACATGAGCTGTCTAAGCC T      | NA                         | NA                          |
| Ca-II-SNP2 | 0.95                   | Ca-desi-LG(Chr)1 | 509                     | GTACTTTGTGATTTGTGTCAGTATGTCAGCCTTGA GTATAGGATGAATATTGTTCCAGGATTGATCTTTGTTTTCCAGAAGCTTCAAGATCAATCTG     | C         | T       | TTGAGTGTGTTAAAAACAAGATAGGAATCAAACA TCACAAATCAGATCAAAGAAAGCAATTCTGGAA AACGCAGATTGATCTTGAAGCAGTTCTGGAAAA C | NA                         | NA                          |
| Ca-II-SNP3 | 2.85                   | Ca-desi-LG(Chr)1 | 27315                   | TCCGCAGAAGTCAGGCAGCTAGTAGACCACCTCA GTGAGCAAGCCAGGGAGGTGGCCAGTGAAGCTT CAATGGAAAAGAACCAGAGCTCTTGCAATGT   | A         | G       | TTTCCAGAAAATTCAGGCTCGTATTAATAACC AGTATAACCCCGACCTTTTGAGCAAGCGCTAT GGAGATAGCGAATGCTAGCGTTAGCCCAGCCA TC    | NA                         | NA                          |
| Ca-II-SNP4 | 3.80                   | Ca-desi-LG(Chr)1 | 66474                   | GTAGAACTCTGATACAAGTTGTCTATACTAGGTTT GTCTGGGCTATTTTATCTTGGGACTTCGTGGTTAA TAATCTGTCTTGACAAATTTGAGCAGTGCC | G         | A       | TGTTTTGAGTTTCAAAAAATAATTTCAAATAA ATTTGTGCAATCAAAGATATTATTGGGTTGAGT CCGGAGACTAAGTTGCTTTCTTTAAGACGTTTTG    | NA                         | NA                          |
| Ca-II-SNP5 | 4.75                   | Ca-desi-LG(Chr)1 | 93741                   | CAACTACAGATGGGTCCTAAATGCAAACAAAAG TTTGGAAGGAGCCCTTACCTTCGCGGTAGCTCTA ACGTGCGATTACGGCACCGTGAGTAAATCCG   | A         | G       | TAAACGTCGTTTCAAGAAGTGATAGAAGGGAAG GTTGCTCACCTCCGTGCTACGGTGCTAGTGAA CTAAATTTGGAAGCGGCGTTGCGAGCGGAGATT TTA | NA                         | NA                          |
| Ca-II-SNP6 | 5.70                   | Ca-desi-LG(Chr)1 | 137009                  | TTCTTTTGGGTTGCGTTTTATTTTTAAACCGGAAGA CTGTAATACTTTTGTATGTTAATATTTGAATTCA TGGATTGAGAACTTTTTCCGCTGCTTGAA  | T         | A       | TTTTCAAAGCGAGGGTGTACTTTTTTTTCAAAA GAAATTAATAAAAACAGAGAAATAAATAAGGTA ACACCTTTGGATAAGTAATTAAGTCATTATAAT    | NA                         | NA                          |
| Ca-II-SNP7 | 6.65                   | Ca-desi-LG(Chr)1 | 199705                  | AGAATAACATATTTTTTTATGAAGTTCAATTTA TCTCGTTGATTCTGGGTATCCATATACTAGAGGTT TGCTTCTCCTTATAGGGGTGAAAGATAT     | T         | C       | AAACAACGTTCAATTGTCATCCGTAGAGATGAG TGTCTGTAGTTAAATAACTCTTCGGGACTCCTA GGTTGTCTACCTTGGCCTTTATATTTTTGGGCA T  | NA                         | NA                          |

| Marker IDs  | Genetic positions (cM) | Chromosomes      | Physical positions (bp) | Flanking sequences/Forward primers                                                                           | ICC 12968 | ICC4958 | Flanking sequences/Reverse primers                                                                                                                                                                                                                                                               | Annealing temperature (0C) | Amplified Product size (bp) |
|-------------|------------------------|------------------|-------------------------|--------------------------------------------------------------------------------------------------------------|-----------|---------|--------------------------------------------------------------------------------------------------------------------------------------------------------------------------------------------------------------------------------------------------------------------------------------------------|----------------------------|-----------------------------|
| Ca-II-SNP8  | 7.60                   | Ca-desi-LG(Chr)1 | 216154                  | GCACTTGGTTTGACTCCAATTGGACATCTACAAC<br>CAAGATATGGCTGAAATACTCTACATATGTCATGT<br>TGATTTCTCACCAAATTCAGCACTGCACT   | G         | A       | ATATTTTGTGTATTTTGTCTTTGAGTTAATAA<br>AATGTTTTGTGTTTTATTTTCATTGATTAAGTATG<br>AATTTTTCGTAATTTTACATTGCGTTGTGTTT                                                                                                                                                                                      | NA                         | NA                          |
| Ca-II-SNP9  | 8.55                   | Ca-desi-LG(Chr)1 | 232647                  | CATGCTTCACATATTTTATCTTTATCAAATTGAGT<br>TTGGGTAATCCTCTAACATGATCTAACTTTGAGAT<br>TTTTGAAATTGTTTTCATGCTGATATGTC  | T         | C       | TAGAAAGAAAAATTTATACGTTTTATATCTTGAA<br>GAACTACCTAATGAATCTTGTTTTATGTCATCA<br>ATAAAGATAAATGGATATGGCATAAAAAGAGCT                                                                                                                                                                                     | NA                         | NA                          |
| Ca-II-SNP10 | 9.50                   | Ca-desi-LG(Chr)1 | 263358                  | TGCAAAGTAGAAGTTTGAAGGAGCCCTTACCTTA<br>GCGTTAGCTTTAACGTGGTTTTCCGGTACCGCGA<br>GTAATTCGGTAAAATCTTCGCTCGCAACGC   | C         | A       | ACCCCTCCGTTTCTTCTAGATCCAAACCTCATT<br>TCTCAAAGAGATAGAAGGAAAGTTGCTCACCA<br>CCACACTACGGTGTAGTGAACATAATTTGGAAG<br>C                                                                                                                                                                                  | NA                         | NA                          |
| Ca-II-SNP11 | 10.41                  | Ca-desi-LG(Chr)1 | 290259                  | TTGAAAAAGAAAAATTTGTCATCATCTTCTCAACT<br>CTCTAAATCCGTTATTTGTTTGAAGATCTATGTGA<br>CATACTCTGATCATGATATCCTCTACTCT  | A         | C       | GATATTGATTCGCCATTAACCTTGTCCAACAA<br>TAGTCCTTGTAAATGATTATGTGTATCTTGATAT<br>GGATGATTTTGTGTATCTTGATATGGAGATAGA                                                                                                                                                                                      | NA                         | NA                          |
| Ca-II-SNP12 | 11.32                  | Ca-desi-LG(Chr)1 | 307564                  | GTTTTACTACTACCGTTTTTGTGTTATTACTA<br>GTTTCAGTTTTATGTTGATGATTATATTAAGTTTT<br>TTCCATGATTATCCTTTTATATGTTGCC      | A         | T       | AATATAAAAAAGTATATGACCAAGACGTTCTCT<br>CCACTGAATTAATAAATAAATAAATTAAGG<br>ATTTCAACTTGGGTTACTTGTGTTGATATGA                                                                                                                                                                                           | NA                         | NA                          |
| Ca-II-SNP13 | 12.23                  | Ca-desi-LG(Chr)1 | 342387                  | TGTTTGTGTTTGACTGGCTTGGCCTTGCCTTTCG<br>GAAATCGCAGTTATTACAAGTTAATGAGTCTTGAA<br>GTTCAAGTTTGAGAGAAACCTCGCTCTGATA | A         | G       | TTAATTCAAAAATTTACTAGTACTAAGGTTTTTC<br>ATATAAAAAGTCATTTGTAATTACATAACTAAAA<br>TATAAATTACAACCTCTAAATTCCTGGTATCAC                                                                                                                                                                                    | NA                         | NA                          |
| Ca-II-SNP14 | 13.14                  | Ca-desi-LG(Chr)1 | 388218                  | CCATATGCTTCCCTTGTATATGCCTTTAAGCAAGTG<br>CCACAAGTGAGATTGAACGTCGTCCAAACAATGTT<br>TTTCAATCATACTTGTGCAACAGCGGAGC | G         | A       | AAGGTGTTCCAGATAACATTATGAGACGGGATAT<br>GGACAGGCATTGTATAACTGTTTGTCCAATGAA<br>GCTTGTAATTTGCTTTTTATGCAGTCGGTTG<br>T                                                                                                                                                                                  | NA                         | NA                          |
| Ca-II-SNP15 | 14.05                  | Ca-desi-LG(Chr)1 | 544347                  | TGCAAAGTAGAAGTTTGAAGGAGCCCTTACCTTA<br>GCGTTAGCTTTAACGTGGTTTTCCGGTACCGCGA<br>GTAATTCGGTAAAATCTTCGCTCGCAACGC   | G         | A       | CTGCAACATCCGCAGAGCAGTGTATAACTTAGC<br>TGACAGATTCAAGTCTACTTCAGTTTGATGTTG<br>GTCAGGAATGTCAAAGGGAAGATTGAGTTCC<br>CAGATGTCAGAGAACCTTTGGCTGGAGTTGGA<br>TCACATTTCCCTGGCTTTGATGCTTTCACAAGA<br>GACGGGAATCTCAATATAATTTGTTGCCACCA<br>AACAGCACATTCTGAACCTTTGCTTCATTTACC<br>TTCAATCTTCATCATCTCATCCATAAAAATCAC | NA                         | NA                          |

| Marker IDs  | Genetic positions (cM) | Chromosomes      | Physical positions (bp) | Flanking sequences/Forward primers                                                                          | ICC 12968 | ICC4958 | Flanking sequences/Reverse primers                                                                                                                                                                                                                                                                                                                                                                 | Annealing temperature (0C) | Amplified Product size (bp) |
|-------------|------------------------|------------------|-------------------------|-------------------------------------------------------------------------------------------------------------|-----------|---------|----------------------------------------------------------------------------------------------------------------------------------------------------------------------------------------------------------------------------------------------------------------------------------------------------------------------------------------------------------------------------------------------------|----------------------------|-----------------------------|
| Ca-II-SNP16 | 14.96                  | Ca-desi-LG(Chr)1 | 547496                  | TTGAAAAAGAAAAATTTGTGCATCATCTTCTCAACT<br>CTCTAAATCCGTTATTTGTTTGAAGATCATGTGA<br>CATACTCTGATCATGATATCCTCTACTCT | G         | A       | GCACGACTCCAGCAGAGCCAAATAGACAGCAT<br>TGAACACCCATGCCAAATAATTACTTGGGTGTA<br>GAGGGTGGCTTCTGACAATTTTGGGTGTAGA<br>GGGGTGGCTTCTGGTTTGGGCTTTATTTAAGT<br>TTGCTCCATGCTATTGTCTGTTATGGAATGTT<br>GATGGTAGAAGAGCTCATATGTCCAACCTCCCT<br>AGTGATATACAAATCAAG                                                                                                                                                        | NA                         | NA                          |
| Ca-II-SNP17 | 15.87                  | Ca-desi-LG(Chr)1 | 549097                  | CAGTCATTGAAAGTCCATTTTTCTGCCACTGTTCT<br>AACAGCACATCTATAGCTTCCATTTCTGCATGTCT<br>AGTAGCCTGTAAAAATGATTTAGCAATAA | C         | T       | ATATTTTCATCACTTTATGCAATTCCTAATC<br>ATGCATTTGTTTTAGATTTTCTTACTACTATTA<br>TGTCTTTTTCGTACCTGTGAATTTCTTCTGTT                                                                                                                                                                                                                                                                                           | NA                         | NA                          |
| Ca-II-SNP18 | 16.78                  | Ca-desi-LG(Chr)1 | 627392                  | TTCTGACTGTTCTCTCCTAAATAGTGAATGTTTGG<br>TTGAGCTTGTATGGGCTTAACTTATTGCATAAATT<br>TGCATACATGCTTGAAAAACTTATGAAAA | G         | C       | AAATCCAGCATAAACTGAAAACAACCTTATGACA<br>ATAAGCAAGCAAACCTGGAGGAGCTTTCTGAAAA<br>TAAGTTGAAAACAACCTTATGGAATATCACAAAGC<br>T                                                                                                                                                                                                                                                                               | NA                         | NA                          |
| Ca-II-SNP19 | 17.69                  | Ca-desi-LG(Chr)1 | 770437                  | GCTCATTCTCATTGAGTGGTTACATTAAGGT<br>TCCTCCATTTTTTAATTGAATTGCACCTTCACTC<br>TTCTATTCTAGTAATTAGTAACGATTAAT      | T         | A       | TTATTTCCAAACGCTGTCTAGGATAACTCTTTA<br>TAACAACTAATAGCTTATATGAAAATTGTTTGAC<br>TTAATGATTTATATGATAAGCACTTATAACTT                                                                                                                                                                                                                                                                                        | NA                         | NA                          |
| Ca-II-SNP20 | 18.60                  | Ca-desi-LG(Chr)1 | 923863                  | GACTTTGTGATGGCACTAATTGATTCTTCTTTTTC<br>ATCTCTTACTTTTACCCCATACAACCGCATACAA<br>GCCACATACTATTAACACTGCTCCAATGAT | G         | A       | TTGTTTACCTAATTTTTAGTTGAATAAAAAAGT<br>TATTATGGATCAAATTGATTGATTTAATGGCT<br>CACTTGAACCTTATTGATTTGTTAATTTTCAG                                                                                                                                                                                                                                                                                          | NA                         | NA                          |
| Ca-II-SNP21 | 19.51                  | Ca-desi-LG(Chr)1 | 1009711                 | CTTATGAAATATTAATCCATGTGTTAAATTTTCTG<br>ATGAAATCATTTATTTTTCTTCCATCTATGTCTG<br>CCAATTTTCAGTGAATTTGTTGAAGCCT   | T         | C       | ACAGGATGCAAAATCAATACCACAATCACTTAA<br>TTTTCTTACAACCTTTCGTAGAATAGGCTCCAG<br>TGACGAGCAAAGTTTCTGCAGACTGTCCACCTT<br>C                                                                                                                                                                                                                                                                                   | NA                         | NA                          |
| Ca-II-SNP22 | 20.42                  | Ca-desi-LG(Chr)1 | 1066513                 | GACTTTGTGATGGCACTAATTGATTCTTCTTTTTC<br>ATCTCTTACTTTTACCCCATACAACCGCATACAA<br>GCCACATACTATTAACACTGCTCCAATGAT | A         | G       | AAAGGATAAAGATAGATAGGTCCCAAGACAAT<br>TGATATACTTCTCACTTCTAGCAAGGAAAC<br>TCAATTCGCCAAGTGGAAAAGAAAGAAAA<br>ACTGATGATTTCTTACAACCTCATAGATCATG<br>TCTTCAAACAACATTTCTATTCAAGAATCCAAC<br>ACTACTATACAACATAGACAACACAACAAGC<br>CGAATAGCAGAAAAGAGTAAAGTACATAGA<br>ACACAGCTCAATTCAGTACTGCCCCAGAAAA<br>TCTAGTGAATAACTAAAGAAAATAGTAAAAAG<br>ATAGATGGGAGATAGAAGAGAACAATTTAATA<br>TAAACATCTCCATAAGTTCACTAATTTATGTTTT | NA                         | NA                          |
| Ca-II-SNP23 | 21.33                  | Ca-desi-LG(Chr)1 | 1089631                 | TAGTTTTTGTGTTTTTGTGTTGAAACGGTCTT<br>TCTTTACCCATGGGCAATGAGTCTCTCTTTCCG<br>GACAACACATACAAAGAGACCCGCCAACA      | G         | T       | TCTAGTGAATAACTAAAGAAAATAGTAAAAAG<br>ATAGATGGGAGATAGAAGAGAACAATTTAATA<br>TAAACATCTCCATAAGTTCACTAATTTATGTTTT                                                                                                                                                                                                                                                                                         | NA                         | NA                          |



| Marker IDs  | Genetic positions (cM) | Chromosomes      | Physical positions (bp) | Flanking sequences/Forward primers                                                                             | ICC 12968 | ICC4958 | Flanking sequences/Reverse primers                                                                                                                                                               | Annealing temperature (0C) | Amplified Product size (bp) |
|-------------|------------------------|------------------|-------------------------|----------------------------------------------------------------------------------------------------------------|-----------|---------|--------------------------------------------------------------------------------------------------------------------------------------------------------------------------------------------------|----------------------------|-----------------------------|
| Ca-II-SNP24 | 22.24                  | Ca-desi-LG(Chr)1 | 1120966                 | TGTTTAAATTATTTTTATGTCCTTTTTTTTTTTGTTGG<br>TGAAATTGCATTTCATTGAGTCACTTTAATGACA<br>TTAACACCCTCTAATTTGAGAAAACAA    | C         | T       | ATCAAACATGTTTTTGTACACTTATATATATT<br>TCACTATGTTCTTAATAGCACAAATTAATATATAT<br>ACACAATTTTTTAATAAGTATAGAAAAGGTC                                                                                       | NA                         | NA                          |
| Ca-II-SNP25 | 23.15                  | Ca-desi-LG(Chr)1 | 1136888                 | GTCCTACTAACATTAGTCTCTGAGTTTGTAGCAG<br>GGGAAACCATGGTTAATTAGGCTCATTGTCACATC<br>ATGTCCTTCTCTGCTTCAAAAATGAACAA     | T         | C       | CAATATTATAGTTTGCAAGTGTATCTGTGACCTC<br>AACTGCAAAATAGAAGTATGATTATTATTCGAAG<br>ATTTACCTGCAAGTTGGAAAATGATAAATGTGT                                                                                    | NA                         | NA                          |
| Ca-II-SNP26 | 24.06                  | Ca-desi-LG(Chr)1 | 1145410                 | TTTTGCAAAATACGTGCCACATGAACTGAGGGC<br>CACAAAGTGACATTGTGTTGGTGAGAGTGGTTTTG<br>CAGCTAGGACAAATGTAGGTCCTATCAAGAGC   | A         | G       | CTACCAGTACTCTGTCCAGAAGGTAACGAGA<br>AACTGAAGTTAAAGACACTTTCCCTGTCCAGT<br>TCACTGAAGTACTAGTGAGCAGAAAAATCCA<br>A                                                                                      | NA                         | NA                          |
| Ca-II-SNP27 | 24.97                  | Ca-desi-LG(Chr)1 | 1147254                 | TTGGGACGTGAAGTGGAGAAGTGGAGTATCTCAT<br>GAGAATCATTGAGTTAGTCATGGGCAGAGCAGAA<br>AGATCTGTTCTCTAAATGAGCCTAGCTCTGGG   | A         | T       | ATATATATATATATATATCTGATGATTGCCA<br>ACATATTACAATTCATAAATATATTTTTACTCTA<br>ATTCTTGAGACAGAGGAATGAATATTCCTGC                                                                                         | NA                         | NA                          |
| Ca-II-SNP28 | 25.88                  | Ca-desi-LG(Chr)1 | 1184107                 | TACTGGACTGGACAAGCGATTTAACATTATATGT<br>GGAATAGCTAGAGGGCTTCTTTATCTGCATCATGA<br>TTCAAGACTCAGGATTATCCATAGAGATCT    | C         | T       | ATGTATTTGCTTCTGTTGATCTTTGCCGAATAT<br>TCTAGCCATCCCAAAGTCTGATATTTAGGGTT<br>CATTTTCGCTGTCAAGTGAAGTGTGCTTGCCTT                                                                                       | NA                         | NA                          |
| Ca-II-SNP29 | 26.79                  | Ca-desi-LG(Chr)1 | 1188582                 | GTCCTACTAACATTAGTCTCTGAGTTTGTAGCAG<br>GGGAAACCATGGTTAATTAGGCTCATTGTCACATC<br>ATGTCCTTCTCTGCTTCAAAAATGAACAA     | G         | A       | GGCGTCGAGATTCGAGTAACATCATGGAAAAG<br>CCAAGATGATCCATCAAGTGGTATGTTATTT<br>CAGTCTTGATTATCATGGTATCCAGATATTTAC<br>TTGTGGACAAGCAACAAGGGTGTGTTAGAAGT<br>GGATCATGGAATGGTGAAGTTTTGGTGGAGT<br>ACCAATACTAAAT | NA                         | NA                          |
| Ca-II-SNP30 | 27.70                  | Ca-desi-LG(Chr)1 | 1203450                 | GTTACACCTTATGGTTACAGGAACATATGCAGGGGA<br>TGGCTCAAGACAGCCTAGTGAGTTAGAATTGGCT<br>CAAGCTTTTCATCAGGGGAAGTACTTTGCTGG | A         | T       | ATACATAATTATAAATGACAATATGTTAAGTGG<br>TACATAACTTAATGAAAGATTGAAGGACATA<br>AATCATTGTGGTCCCTGAGCTTCTTAGCAAT                                                                                          | NA                         | NA                          |
| Ca-II-SNP31 | 28.61                  | Ca-desi-LG(Chr)1 | 1262058                 | TTGGTGTTAGGGCTTTGGCTTCTATCCACTTAGG<br>TCCAATAAAAAGGTAAGTGGTGAAGCATGTTAC<br>TGCTATGTTGGAGGACTTTTATTCGTCA        | T         | A       | GTGAAAGCACATTTGAGCTCTGGTAGAGTCTA<br>GTATTTTCAGATAGACAACCTCAAAGTGAACA<br>ATGATACCATCATTATCTGCATAGAGCCATTCT<br>CC                                                                                  | NA                         | NA                          |

| Marker IDs  | Genetic positions (cM) | Chromosomes      | Physical positions (bp) | Flanking sequences/Forward primers                                                                         | ICC 12968 | ICC4958 | Flanking sequences/Reverse primers                                                                                                                                                                                                      | Annealing temperature (0C) | Amplified Product size (bp) |
|-------------|------------------------|------------------|-------------------------|------------------------------------------------------------------------------------------------------------|-----------|---------|-----------------------------------------------------------------------------------------------------------------------------------------------------------------------------------------------------------------------------------------|----------------------------|-----------------------------|
| Ca-II-SNP32 | 29.49                  | Ca-desi-LG(Chr)1 | 1306596                 | GGCAATCGATTGAGTGAGTATTGAGCTCCAGGT<br>TTTAAGCCAATCGATTTCCAATCGATTTGGTCGA<br>ATATGAATGAGTCCCTGACTTAAGGCCAAT  | C         | T       | TGGATGGTAGACAGGGACTTGGCCAAATGGAC<br>AAAATCGATTAGCCAATCGATTTGTAATCAGTT<br>TTCGAAAATCATTACGAAATCGATTGCCAAT<br>C                                                                                                                           | NA                         | NA                          |
| Ca-II-SNP33 | 30.37                  | Ca-desi-LG(Chr)1 | 1413807                 | AATGGTCATTTTTCTTCTTTCTTTATGGCTACCT<br>TTTTGAGATTATTACTGCTACAACCTGTAAGATTT<br>TTTTAGAGAGCTAATGAAAACAATTTAT  | G         | A       | TAAAATAAAGTCATACTTTTCTTATATAAACTAT<br>AAGTTGTTTTTAACTATCCTAGAGAGATTGT<br>AAAAATAAATTGAAAACAACATATTGACATGT                                                                                                                               | NA                         | NA                          |
| Ca-II-SNP34 | 31.25                  | Ca-desi-LG(Chr)1 | 1440076                 | ATTTCTCAAACCTCGTGTGATGATACTCACTACCT<br>CCATTTGTCCTTAGCAATTTGATAGTTTTTCCAATT<br>TGTTTTCAATTTTCACTTTGAAATCTT | G         | A       | CACTGGGAGGTAATAAGTACTTCATAATATTTG<br>TTGATGAATTTAGTAGAATATTGTTGATTTATTT<br>GATAAAGACCAAAGATAAAGTATTTGAAATATT                                                                                                                            | NA                         | NA                          |
| Ca-II-SNP35 | 32.13                  | Ca-desi-LG(Chr)1 | 1524692                 | AATGGTCATTTTTCTTCTTTCTTTATGGCTACCT<br>TTTTGAGATTATTACTGCTACAACCTGTAAGATTT<br>TTTTAGAGAGCTAATGAAAACAATTTAT  | G         | A       | GCGATTTTTACCAAACAGTTCCTGGCCCTC<br>CTGTCCTGCCTACGATCTCAACTGTTCTGTTTG<br>CTAAAAACCATGTGGCAAGAAAATGAAATGATA<br>GAAAGCAGAACTTGGGGAGTAAAGGCAGATTT<br>GGGTAAATCTAAACATTGCAGCGTCTATTTGG<br>TTTCAAAAAATTATTTTCTTTCTGTTATTGCTT<br>TTATTTGCGATACA | NA                         | NA                          |
| Ca-II-SNP36 | 33.01                  | Ca-desi-LG(Chr)1 | 1536229                 | CTATGAGTCTTGCCATACTATCCTTTTTCTCCTTT<br>TCTGGTAGTGCGGGTGCATGCTTTCTCTCCTC<br>CCAGTGCTCCTGCCAACCTTGATGAACCA   | A         | G       | TATTCGATTCAAAGGAAAGATGACATAAACAAA<br>GTATGTACTTGAAAAATTCGATGGGAAGAATGA<br>TTTTGTGTTACGGCGTCTCAAGATGAAAGCGTT<br>G                                                                                                                        | NA                         | NA                          |
| Ca-II-SNP37 | 33.89                  | Ca-desi-LG(Chr)1 | 1609264                 | AAACTCAAATGTTAATTTTTTCCCTAATCTGTAA<br>TCATCTATTCCATACATCTGTTACTATTACACAAAT<br>CATGCTCTCATGATGTCATAGGTGGTT  | C         | T       | TTTACTTTTCGGGTTAAAATTGTCGACAAGAA<br>GGTCCTCATCCCAAAGAAATATAAATTGTAGT<br>CGGCAACTATATCTGGATGCAAAAACCGTTTTG<br>C                                                                                                                          | NA                         | NA                          |
| Ca-II-SNP38 | 34.77                  | Ca-desi-LG(Chr)1 | 1628335                 | TCGGATTAAGATGTCAAATATTGATTTCCCTCCCT<br>TAGTCAATCTATTTCTGCATTTCACTTCTTTTATT<br>AATTTCCCTTTTTCTTGTTTTTTATTC  | A         | T       | TGTGTTGACACAATATTAATGAATCCTTCATG<br>AAACAATACATAAAAATGTTAGAAGTGTATGAT<br>GCTAATGGTATAGCCAAAAAGGAGTCAGACAT                                                                                                                               | NA                         | NA                          |
| Ca-II-SNP39 | 35.65                  | Ca-desi-LG(Chr)1 | 1870704                 | AATCGATCGGTGGGTTTGTGAGTCATTGCGAGTG<br>GGACTTGGTGTGGAAGGTATGGTGTAGAGTG<br>CCAATGATTGCATGGCCATTGTATGCAGAGCA  | G         | A       | AAAGTCTTCAGTTGAACTTCCAGTTTGAATGGC<br>CATATATGTAGAGTATGAAAATGTAAGAAGTG<br>ATGTAATAATTAGGCTACAAGTCCATGATAGCAT<br>G                                                                                                                        | NA                         | NA                          |

| Marker IDs  | Genetic positions (cM) | Chromosomes      | Physical positions (bp) | Flanking sequences/Forward primers                                                                              | ICC 12968 | ICC4958 | Flanking sequences/Reverse primers                                                                               | Annealing temperature (0C) | Amplified Product size (bp) |
|-------------|------------------------|------------------|-------------------------|-----------------------------------------------------------------------------------------------------------------|-----------|---------|------------------------------------------------------------------------------------------------------------------|----------------------------|-----------------------------|
| Ca-II-SNP40 | 36.53                  | Ca-desi-LG(Chr)1 | 1946438                 | GCCTCATTCCCACCTACCTCTAGAACATATTTTATTT<br>ATTTTAATTTGATTGTGAGTGAATAATGTCATGAG<br>ATTTATTTTCATATATTATGTGCACCTTCTT | G         | C       | TGTACACCACCATATGAAGCCATGAACTCAACA<br>GGAAACACCCACAACCAACATTGCATTACATCT<br>GACCTCCTTTTCATCATCACACATACCCTTGTA<br>T | NA                         | NA                          |
| Ca-II-SNP41 | 37.41                  | Ca-desi-LG(Chr)1 | 2008908                 | TGCTGTGATTGCAGAATGTGGTGATGCTTGTTTA<br>ATACTCAGAAATTGAACTTCCACAAGGATGCGG<br>GTAACCATTTTTTATTCAAATTCATTAAG        | A         | G       | ACCAATCGACCAACCTAATGATGCATATTGCAG<br>TTGAGCTTCAAACCTATAAAATAAAATAAAAGC<br>AATGAAATATTGGCATGATTTATATTACTATAT      | NA                         | NA                          |
| Ca-II-SNP42 | 38.29                  | Ca-desi-LG(Chr)1 | 2019308                 | AAGGCCATTGATATTTCTGGTGTCTCTATGCTGGT<br>AGGTTTTCTTTATAATGTCCATGTAGAGAAGTCT<br>TTCTTCTTTTGGCTACTATCATACACTTAT     | C         | G       | AACATGAAGTTAGAAGATAAAAAAGTTTGAAA<br>TGTGCTTGAAGTTCCTGTTTAAAGATGGTTGCT<br>TTCAGTCAAAATTTTCCCAATAATAACAACG         | NA                         | NA                          |
| Ca-II-SNP43 | 39.17                  | Ca-desi-LG(Chr)1 | 2036194                 | AACCACATTTTCATTCCTGAGACTGAAAATAGTTAT<br>GGCTTATATGGCCATGATGACTCTGATCAACTTCC<br>TTCCACCACCACTGCCACTTACCATCCTTC   | C         | A       | GGTATTCTCAAAGTGTCCTTGTGTAATACTT<br>TGTGTTATATGCATCATTATTGTAGTACTTGTTG<br>TTGATTTTGTGGTGTCTTCAAATTGAGTCTT         | NA                         | NA                          |
| Ca-II-SNP44 | 40.05                  | Ca-desi-LG(Chr)1 | 2040493                 | TATTTCAAAAATTAGTCCAATTTTTCTTTGAAAAA<br>ATGGGGCAGCCCGAAGTCTTGAGGGTTAGCCCG<br>ACCCGACCAATTTGTAACCTGATCAATTGG      | A         | G       | ATATGTAGAGCTATCAAAATGGTGTGGTCTATT<br>AGCTCACATTATAGGTCATCAGATTGTAATAAAA<br>GTTGATCCAAAAATAAAATCTTTTCTAGTCCAA     | NA                         | NA                          |
| Ca-II-SNP45 | 40.93                  | Ca-desi-LG(Chr)1 | 2050795                 | TCACCTGATATTGGAATAGATGGCCCTGGTTTTTC<br>AATGTGATTTAACTATGCTTTAGACAAAAGTAGCTA<br>ATCCAGACTATCACTCAATTGGTTGCTTTC   | A         | C       | TCGTTCTTGAGCAAAATCTAACCCTAATCAA<br>AATTATATAGAGAAGTTCATTTTCTTGCAATAA<br>GTTACTCAAAGTCAATAGGGTCTCATCATCTT         | NA                         | NA                          |
| Ca-II-SNP46 | 41.81                  | Ca-desi-LG(Chr)1 | 2056298                 | TTTCTATTTAAGTACCAAGCTAGGTGTTTGACTTT<br>GTTTTATTTAGTATTATTACTTTATTAATATATTAC<br>CATTATATAAATTATAGTCTTATGTGT      | T         | C       | GATATTGAATTTAATAATATCATTATGAATTGA<br>AGGATAGCTGAATGACTTCTTTTTCTTGAAAGG<br>TATACCTGAGTATTGGATGAACTCATTTTTTCT      | NA                         | NA                          |
| Ca-II-SNP47 | 42.69                  | Ca-desi-LG(Chr)1 | 2073370                 | TCTAATCCATAATTCCTTGAAGTTCGTAGAGTTTG<br>GATTTAATCTCATCAGTTTACGACATATTTCTCAA<br>CCCTAATTCCTTGAAGCTGTAGAGTTTG      | G         | A       | CATATAAAGACAAAGAAAGAGACATAAACACGA<br>TTCAAGGTGTTCAAAGGGAGTAATTTACACACT<br>TGAGAGAATATGTCGTAAACTGAGGAGATTTAA<br>T | NA                         | NA                          |

| Marker IDs  | Genetic positions (cM) | Chromosomes               | Physical positions (bp) | Flanking sequences/Forward primers                                                                            | ICC 12968 | ICC4958 | Flanking sequences/Reverse primers                                                                              | Annealing temperature (0C) | Amplified Product size (bp) |
|-------------|------------------------|---------------------------|-------------------------|---------------------------------------------------------------------------------------------------------------|-----------|---------|-----------------------------------------------------------------------------------------------------------------|----------------------------|-----------------------------|
| Ca-II-SNP48 | 43.57                  | Ca- <i>desi</i> -LG(Chr)1 | 2084773                 | CGCGAATCTCAGCTGCATAGCGTCCCCATGGTCG<br>CTTTCTAACACCTCTGTAGTGCCTTCGCGGTTAG<br>CTGAAGAAGATGAAGATGAAGAATCCATTA    | C         | G       | CGGCCAGCCGACAATTACGGGAGCAAATGTGG<br>GTCCCATCACTTTTATAAACATCCATCCATTCCA<br>ACACAATCACTTCAAATCTCTTTTCTTTCTTT      | NA                         | NA                          |
| Ca-II-SNP49 | 44.45                  | Ca- <i>desi</i> -LG(Chr)1 | 2109647                 | GTTGTGCGCATCGACAATTTGGTCCATATATATCTA<br>TAGAGGTGTCTACATATTGGTGGATATTACCAAGG<br>TAGTATTATCATAGTATAGCATCTCTATCT | T         | G       | TGGGAAACCTCACGTAAGCCCAAAGACAACC<br>GCAACAAGACAAAAATTTAAGATATAACTAGT<br>CTTTTTTAGGCTCATTAAAGATTTGACAATGACCT<br>T | NA                         | NA                          |
| Ca-II-SNP50 | 45.33                  | Ca- <i>desi</i> -LG(Chr)1 | 2140927                 | ATGGCTGTGTATATGTTTATTCATGCGGGTATTGA<br>CCGGCCCAAAGAAGGTTAATATTTGGCAGAAATTA<br>AATGGTACACCTGCGATGATAAATGTGTGA  | T         | C       | TGGTACTCTTGTGCAACGATCAAATATTAACA<br>ATAAGACATGTCAAACAATAAACCTTCTTTGG<br>GTGCGATTTACTGCTCATGTATACCAAATAATT       | NA                         | NA                          |
| Ca-II-SNP51 | 46.21                  | Ca- <i>desi</i> -LG(Chr)1 | 2148209                 | ATCATTCTCGTACCTTTCTCTTGCCTTTTGGCTA<br>CTTTTCTTCAAAGACCTTTCTTTAAACATTTTAAAT<br>AGTATTTTGTCTTTATTGAATGAATCAAA   | C         | T       | CTCGCTGATTTTAAATTCATTAACAAGGCATA<br>ATAGTATTAAAGAATGAATTTTGAATTCATT<br>ACAAGGGCAGAATAGTATTAAGAATGAATT           | NA                         | NA                          |
| Ca-II-SSR45 | 47.09                  | Ca- <i>desi</i> -LG(Chr)1 | 2162549                 | CTGTGAGAAAATGGTTGCCA                                                                                          | (CT)9     | (CT)10  | TCCAAAAGCAAAGCAACAAA                                                                                            | 59.69                      | 138.00                      |
| Ca-II-SNP52 | 48.87                  | Ca- <i>desi</i> -LG(Chr)1 | 2249502                 | TATTTTGGGAAATCCAACCCTTCCCTGTCTCA<br>AAGAGCCACAAAATTACTTTGATAACGTTGCAAC<br>TATTTTCTCTGTATACGGGCACTCTAAG        | A         | T       | AAAAGTGTCCCGTGTGGTACAATAGTTGAAAT<br>TGTTCAAACAAAATATGTGAAATCAAACAATTT<br>TTAAAGTTTGACTCATCGTAGGACATACAATAC      | NA                         | NA                          |
| Ca-II-SNP53 | 49.77                  | Ca- <i>desi</i> -LG(Chr)1 | 2251306                 | TGTTTGGGTGCTAGGTTTGGGCCTAAGCCCAATA<br>AGGGGGGTGAGTACGGAAGTGAGGGGAGAAATG<br>CTTATGGTGCAAGGGGTAAGCATCTGTATC     | A         | G       | AGGAACCCAAATCAAGGTGAAATTGATAAATTG<br>TATTATTGATTGAAAATAAGGAGAATGTATTACA<br>AGAGGATCTCTCTGTAACCTGTAACCTCTGAA     | NA                         | NA                          |
| Ca-II-SNP54 | 50.67                  | Ca- <i>desi</i> -LG(Chr)1 | 2261743                 | GGTTCTGCACCAGACCAATGTTCCGTCACGCTC<br>AAGGGAAGTTTGAATGCTCTAATACCTTGACAA<br>TTTGCCAGAAATCAGGCCTCTTATCTGGTTG     | T         | C       | CTGTTATGTGATAATGTACTTTTCTTCAGAAAT<br>AAGGCCGGTAATTCCTTCAGACTGTCCACCTG<br>CAATGCGAGCTTTAATCGAGCAATGTTGGTCGT<br>T | NA                         | NA                          |

| Marker IDs  | Genetic positions (cM) | Chromosomes               | Physical positions (bp) | Flanking sequences/Forward primers                                                                           | ICC 12968 | ICC4958 | Flanking sequences/Reverse primers                                                                             | Annealing temperature (0C) | Amplified Product size (bp) |
|-------------|------------------------|---------------------------|-------------------------|--------------------------------------------------------------------------------------------------------------|-----------|---------|----------------------------------------------------------------------------------------------------------------|----------------------------|-----------------------------|
| Ca-II-SNP55 | 51.57                  | Ca- <i>desi</i> -LG(Chr)1 | 2272101                 | AACACTGATGTTGGGTGACCCAAAACCTTCGATTC<br>ATCTCCTCATTGGTATGAGTTTGATCCTTTTCTTC<br>ATCATCATCATCATCGAAATCCATTTGAAG | G         | T       | ACACTAGTAGTACTATTGCTGATGTTGAGTTTC<br>AATTTCTTGATGATGATGATGAGGTATTATCTT<br>GTCAAAGTTCTAGTAGTATGATCAGTGCATT<br>C | NA                         | NA                          |
| Ca-II-SNP56 | 52.47                  | Ca- <i>desi</i> -LG(Chr)1 | 2282239                 | TAATTTTTTTCTTCGATTGTTGTTGTGATCTCT<br>TCGTTTGAATGCGTTTTTTTTGTCCGGATTCAC<br>AAAGTAACTTTGATCAATTAAGTTTTCA       | A         | T       | ATACTAACTTAATAATGTAAAACAACAATATATC<br>TACATATAACAATAAATTCAAGTGTCTGTTTCAG<br>ATATGTAACGTTGACGATTTCAAGATCATTGG   | NA                         | NA                          |
| Ca-II-SNP57 | 53.37                  | Ca- <i>desi</i> -LG(Chr)1 | 2289645                 | TTAACTATTTTTTTCTTTCATTGGATCCTTTGATT<br>AATACTACATGTACCACCTTCAATTCATATTTTT<br>ACTTTGCATTAATAATAATGATGAATTT    | T         | G       | TGATTGTCTCAATATTTAATCTTTAATATAGAT<br>TAACAAAAATGTATAAAATAAATGGAGAATAAT<br>AATGTTGCGAAAATATCATTATCAAGTATTGA     | NA                         | NA                          |
| Ca-II-SNP58 | 54.27                  | Ca- <i>desi</i> -LG(Chr)1 | 2293371                 | GGTTTGTGTGTTTGGGAGTACTTGAATGATGA<br>AAATTTTGATGAGGGGGTGTGAAATGCAATGAGA<br>GGAGGGTATGATCGTGAGGGTTTAGAGATAA    | G         | A       | ATTGCTTTCTTGCTGTTTGAATTGGTGACAAAC<br>CATTCTGTAGCTGTTTCTCAAAGATCCATAAC<br>TACTAGAACAATACCAATGACCCACCACTCA<br>T  | NA                         | NA                          |
| Ca-II-SNP59 | 55.17                  | Ca- <i>desi</i> -LG(Chr)1 | 2304660                 | ATTTTATGCACATATTTAGGGTTGAATTTCTCGAT<br>GGAAGAGGAAGTTTTCCATTGCACCATCTATAACT<br>GTTTCGAAACCTTGAACCTTGAAGTGGT   | A         | T       | CACACATGCAAAGGGATATAATATATTCATCTA<br>AAATTTAAGATATTTGAATATGAGACTTCTCT<br>CTTGTAACCATAGCCAATGCGGTATTCTATTTTT    | NA                         | NA                          |
| Ca-II-SNP60 | 56.97                  | Ca- <i>desi</i> -LG(Chr)1 | 2317643                 | ATTTTTTTAAATGGTTTTCTAGTTTTATTTGATCA<br>AAACGTCGCAATCCCTTTAGATTTTTAGTTCTTTTT<br>GGTTCTTGCCTCATGAGTTTGGATATAT  | C         | T       | GACTAGTGAGTACTTTCTCTAATCATTTTTCAAT<br>AAGAAAAGCAAATGAAAACAACAAATTTGAAG<br>ATAGTCATAAACTAAGCTGATAATATTTTGAAA    | NA                         | NA                          |
| Ca-II-SNP61 | 57.87                  | Ca- <i>desi</i> -LG(Chr)1 | 2325015                 | CGATTAAGCTCACAAATGAGATTTCTGCTGTGTTG<br>TCTTTTGAGAAAACAGGAGTACTGTTTTGGGCCAGAT<br>ATGGAGTGAGAACTTGTGGTGAATCTGG | C         | A       | AAGATTTTCTTACTCTGTCAATTTCACTTACTTT<br>GTATTGTAACCCAGGGAACCTCTTGATAACTT<br>CCAGTTACCCTCAATCCAACACTACCAAAGTA     | NA                         | NA                          |
| Ca-II-SNP62 | 58.77                  | Ca- <i>desi</i> -LG(Chr)1 | 2340803                 | AAGGAGATTGAAATTTTTTAAATAATTTTTATGTT<br>ATTTAATTCTTGTGTAGTACACCTAGGGTGTGTG<br>TGTGTGAGTTTGATAGAAAACCTTTGTGCT  | A         | G       | ACATATATTGGATTTGAATCATTATCAAATCA<br>TCATCCACTCAGCTTTTTGTGCACCAATTTA<br>AGAGAATTTTGTATTATTATGAATAAAAAATAA       | NA                         | NA                          |

| Marker IDs  | Genetic positions (cM) | Chromosomes               | Physical positions (bp) | Flanking sequences/Forward primers                                                                           | ICC 12968 | ICC4958 | Flanking sequences/Reverse primers                                                                               | Annealing temperature (0C) | Amplified Product size (bp) |
|-------------|------------------------|---------------------------|-------------------------|--------------------------------------------------------------------------------------------------------------|-----------|---------|------------------------------------------------------------------------------------------------------------------|----------------------------|-----------------------------|
| Ca-II-SSR46 | 59.67                  | Ca- <i>desi</i> -LG(Chr)1 | 2351367                 | GTTGCAGTTACTGGGCTTCA                                                                                         | (TTA)6    | (TTA)5  | AAGCATCAAGATGGCAAACC                                                                                             | 58.93                      | 136.00                      |
| Ca-II-SNP63 | 60.57                  | Ca- <i>desi</i> -LG(Chr)1 | 2358985                 | GACATGTGTGGACTTTGATGGCCTACACATGCTTT<br>TTGGTGCCGCTTTGTTTTAGTTCTTTCTTTTTGA<br>AATTTAAGGAGTTATTTACTTTGTAAAAA   | C         | T       | TGTTTCTAAAAATGTCGACAAATTATTCACTTAA<br>AAAATATATTTCTTTTTATTAACGAATAAAATTG<br>ACATAAAATTTTAAATATGAAAATATGAAAT      | NA                         | NA                          |
| Ca-II-SNP64 | 61.47                  | Ca- <i>desi</i> -LG(Chr)1 | 2363519                 | CTGGGACTTGGTGAATTTTTCTGACTGGACC<br>GACGACGGTCTTAACAGCTTCTTCGACGGTGTCTG<br>ACGCCGGGTTTGAGTGACCCGAACGTTCTTT    | A         | G       | AGGAAGAAACTAACCAAGAGCAAGAACTCAAGT<br>ACCTTGAATTCGTGCAATTCGCAACAATTC AAG<br>CTGTGATGCGTTGCGGATTCTCTATTCTACG<br>C  | NA                         | NA                          |
| Ca-II-SNP65 | 62.37                  | Ca- <i>desi</i> -LG(Chr)1 | 2381955                 | CATTGGGAAATTTGAGTCGAAATAATAATCCTTG<br>TGTTGTGGTGTGATTATGCTTGCAATGTAAGTTGG<br>TATCATATTGACTATTAACAAAGGGTCCA   | C         | T       | GTAGGAATCAAATTCATTATCTTGAAGTTATAAC<br>ACTCACACACCGTTCATCAGTTACTTATGCTAA<br>GGCTTATGTTAGTCTAATTTTTGGTTTCAGCA      | NA                         | NA                          |
| Ca-II-SNP66 | 63.27                  | Ca- <i>desi</i> -LG(Chr)1 | 2392790                 | TGTTCCAAAACGCGGGTGAATCGGAACAAAGCGA<br>GGTAGAAATGGGAGATGTTGAGCGTCTGATGCAG<br>AAGTCGTGAGTTGGTGGCACACAAATTCCTCG | C         | T       | TGCAACCAAATGAGTATACTACTTGCTATATAC<br>TAACAAAATACTCGTGCGTATGCACAAGTCGTG<br>CAACCTTAGTTACCATATCTAGAAGCTTAGTAC<br>G | NA                         | NA                          |
| Ca-II-SNP67 | 64.17                  | Ca- <i>desi</i> -LG(Chr)1 | 2407032                 | ATTTTAGAGTACCTTTGTTAATTAGTTTTAAAGTAT<br>TCCCTAGGATATTTTAGGTTGAAATTATGTTGGGT<br>TATGTTGTAGCGTTCTATTAGAAAATCTT | G         | A       | GAGCATAAAATCTAAGATATAAATCTATTCTAGT<br>TAGCTCATGATTTGTGTA CTCTTTCTGACTTT<br>GCAGCAATGTGTTAGAATGTTACACCATTT CAT    | NA                         | NA                          |
| Ca-II-SNP68 | 65.97                  | Ca- <i>desi</i> -LG(Chr)1 | 2422961                 | TACGCGGGCAAGTGCTGATGATGCTGTTACTGCT<br>TCTAATGATGTGAATACTTCTGAAATAGTCATCT<br>GGACCAGCCACTGAAATTAGTGGACGACGTT  | C         | T       | GAAGCTAGTGGAAAAATTTATCATGAAGAATCA<br>GACCTCTCTTTTCTTTTACCAGTCAAGGAAGAA<br>CTATTCTTCTCAATGACTTGGGAATCTAAGCTG<br>C | NA                         | NA                          |
| Ca-II-SSR47 | 66.87                  | Ca- <i>desi</i> -LG(Chr)1 | 2424978                 | GAGGATTTTGATGGCGAAGA                                                                                         | (GAA)5    | (AGA)8  | GTCTGAGACGAATCCGGA                                                                                               | 60.16                      | 214.00                      |

| Marker IDs  | Genetic positions (cM) | Chromosomes      | Physical positions (bp) | Flanking sequences/Forward primers                                                                             | ICC 12968 | ICC4958 | Flanking sequences/Reverse primers                                                                            | Annealing temperature (0C) | Amplified Product size (bp) |
|-------------|------------------------|------------------|-------------------------|----------------------------------------------------------------------------------------------------------------|-----------|---------|---------------------------------------------------------------------------------------------------------------|----------------------------|-----------------------------|
| Ca-II-SNP69 | 67.77                  | Ca-desi-LG(Chr)1 | 2435676                 | CCTTTTATGTGGCTTTCTTGTGGGACACTTCTTGT<br>TATATTGTTAAACATTAACTTTAGTTTTAGCTTTT<br>CAGTTTATTGTAGTGCTTTAATGCAACAC    | A         | G       | TTGATCCTTCAAGTAGCCTACACTTTATCCTGT<br>CTAGACTCTGCAATCATACAATACATAGTTGTTT<br>TAAGCCCTGATAGCAGCAGCAAAAAGCCACTTC  | NA                         | NA                          |
| Ca-II-SNP70 | 68.67                  | Ca-desi-LG(Chr)1 | 2455899                 | CTCCTTACAAATCTTTCCAATTTCTCCATAGGTT<br>GAAAACTCCAATCCCGTAGTTCACAACAATAACA<br>TCGTGTTTGATGAGGGATGCTACTTTGGCAA    | C         | A       | CTAATCATAGTTGTCTTGCATATTAAGCACAGT<br>CTCTTCAATTTAATTCGTTTTATTTACTTATT<br>TATGGCTTGCAACAACGCCGTGGAACCTCGCTC    | NA                         | NA                          |
| Ca-II-SNP71 | 69.57                  | Ca-desi-LG(Chr)1 | 2464479                 | CGCTTATATTTGGTTCCGATAATGGGTTTGGCAGT<br>CTCAAAAGTCCAATAAAGTTTTATTATTCATCTTCT<br>TTACATTTTTAGCTTCTTGAAGCCGCGCC   | G         | A       | CTAGAATTTTAAATACAATACACAATCTCAGTAG<br>CACACCAAAATGGACTGCTGAGAAGCTGAATTTT<br>AAATACAATACATAATCTCATTAGCACACTAAA | NA                         | NA                          |
| Ca-II-SNP72 | 71.37                  | Ca-desi-LG(Chr)1 | 2472975                 | CTTAGTTTTGAATTTGTGTGTTCTAGTGGTGATCAT<br>TGCCCTTTCACCCCTTTAGTGAAGTATGTTGCTCTT<br>TAGATGTGAGGAAGGAGAATTCATGAAGAG | G         | T       | GCAAAGAAATCTAATAAATTTGTTGCTTTCTAAT<br>CACTGTAATCACGTACTAGTATATCCTATAAAA<br>GTCTACATATTATTTCTCCTAAGTTAAGAAGAG  | NA                         | NA                          |
| Ca-II-SNP73 | 72.27                  | Ca-desi-LG(Chr)1 | 2476682                 | GCCTAGTTTGAAAAATCTTCCCTTTTGATTTGTGT<br>AGGTCTTTATCTCCTTTTCAAATTTCTCCACTTTT<br>AATTTAATATGTTTAGTTTACAAATCATA    | T         | C       | GTCAAAGAATAAAAATAACTTTTTGAACTACAAT<br>ATAATAATTATCAAAATATGTGTGACTATGAAAT<br>ACTCGGTTCAAATGATGAAGAGATGGATGGGG  | NA                         | NA                          |
| Ca-II-SNP74 | 74.07                  | Ca-desi-LG(Chr)1 | 2487961                 | AATTTGTTGGGTTTTATTCGTCATGAGGTGTCAG<br>AGCTTTTGATCTTGATGCTCAAGGGACGGAATTC<br>AAATCCCTTCGTAGATGATTGTAACACGAC     | C         | T       | AAAAAAAACAAGTTCATTTCAATGGTTAATCAC<br>GAGTAAACCTAACAAATTTTCTTTTAAATAGGAG<br>AAGGAGGAATGTTAATTAAGTGACACTAAT     | NA                         | NA                          |
| Ca-II-SNP75 | 74.97                  | Ca-desi-LG(Chr)1 | 2495031                 | TAAGTGCCACGGAAAAACATACTTACCTGGATGG<br>GGTCTATGGATGATCAATAAGGTCCATGTCTAAG<br>TTGGTGACCTCCATTGCACTTTGGAGGGGTG    | T         | C       | TATAAATTTGAACTGAATAGGAAGGGGGCCGG<br>GCCAACGCTGGCCCCACTGCAACAAATATG<br>ATGTAGGCTGTTCTACCTGAGAACACCTTAAGC<br>GG | NA                         | NA                          |
| Ca-II-SNP76 | 75.87                  | Ca-desi-LG(Chr)1 | 2506596                 | TTAAGTATAGAATCCAATTTTTGGTAGAGTGATGC<br>TGCCATTCTTATAGCTTCTAGCTTTTTGGAGGGGA<br>AACCTTCAAACCGTGATAAAACCTACACAG   | A         | G       | ATACAATACATAGCATTATCATATAAATTAATC<br>AACATTTTTTCAATAATTAATACCATAACATA<br>GACATATAAATAAATTCATTTTATGTATGTT      | NA                         | NA                          |

| Marker IDs  | Genetic positions (cM) | Chromosomes      | Physical positions (bp) | Flanking sequences/Forward primers                                                                           | ICC 12968 | ICC4958 | Flanking sequences/Reverse primers                                                                            | Annealing temperature (0C) | Amplified Product size (bp) |
|-------------|------------------------|------------------|-------------------------|--------------------------------------------------------------------------------------------------------------|-----------|---------|---------------------------------------------------------------------------------------------------------------|----------------------------|-----------------------------|
| Ca-II-SNP77 | 77.67                  | Ca-desi-LG(Chr)1 | 2547484                 | TACGACATGAAATTTCAAATTTTATGACTACGACTT<br>TTTATTTCTCCTATCCATTGCATTACATGCCATAT<br>TTTCTCTATTTTCTATTTATTTTATG    | A         | C       | AAAATTTGTAACAAAAACTTCACTATTGAAGGT<br>TGGGATATACCATTGGTGGCAGCATGCATC<br>GGAGGATACTCACGGAGGTGCATTGGTGGTGT<br>GC | NA                         | NA                          |
| Ca-II-SNP78 | 78.57                  | Ca-desi-LG(Chr)1 | 2577406                 | TCTCAACTTTGTTCTCTATCGAATTCACAAAAAC<br>AGTGTGGCTTTTACCTTCAAATGGACCAAGCTA<br>GGTTTCTTCCATTTGGGTGTTCCGACAA      | C         | A       | ACGATTGTGAACAATCAAGATCTAGCATTTTAC<br>AAGTGAATCATCAGAAAAACAGACACCTCCTA<br>CTCTTCTTTGGAAGAAGAACAGTGAAGAAG<br>T  | NA                         | NA                          |
| Ca-II-SSR48 | 80.30                  | Ca-desi-LG(Chr)1 | 2590753                 | ATAGTGGACCCCAATCCA                                                                                           | (CT)9     | (CT)7   | TCGCTGTTGTGTTTTGCTT                                                                                           | 60.05                      | 144.00                      |
| Ca-II-SNP79 | 81.13                  | Ca-desi-LG(Chr)1 | 2597468                 | GGCAATGTCATGTTATAAAGGAGGGTTATTTGTTG<br>TTGTTGGGCAGCAAGTATAAATCAACAACATGTG<br>TCACTCTTCAAAGATATTGGTCATTTTTT   | A         | T       | TTGAGACATAGCATTCTGTCCAAACAACCAA<br>TATCTTTAAACAACCCAAAGGCCAAAAACAACC<br>AATAATTTTGGGGTTACAACCAATATATCCGT      | NA                         | NA                          |
| Ca-II-SNP80 | 81.96                  | Ca-desi-LG(Chr)1 | 2615225                 | ATATATGTAGTTTTGAATTGTATAAAGCCACTGAAA<br>AGTGAATATTTTATATTCTATTATTCAGTTGCTG<br>TTGTGCGAGGAAGGACCCGTTCTCTGGT   | T         | G       | CTTCATTACAAATTTTTCCACCTGTTTCATTTAT<br>TGTGGGTAGGGATGGACTAATTTGATCTTCGCT<br>GATTTGAACTCTTCCCTTCTTCAAACCTCTC    | NA                         | NA                          |
| Ca-II-SNP81 | 82.79                  | Ca-desi-LG(Chr)1 | 2626185                 | AGGATGTTAGATATCTTAGTCGGTTAATTAGTTAA<br>GTTAGTTAGTTAATTACACTAGTCAGTTAGTTATTT<br>TACACAAGTTAGTTGTTTATCTAATTGAC | A         | T       | TTGAGTTAAGGTGTTGATAAAGAGAAATAGAG<br>ATAAGTAAATTGAATGATATTGATAATTGAGAGA<br>GTTAATTACATCAAGGGTTACAAACACTTATAT   | NA                         | NA                          |
| Ca-II-SNP82 | 83.62                  | Ca-desi-LG(Chr)1 | 2639056                 | CAAGGTATGAATAATGCTTTTGTCTCTCCCTCT<br>GCTGTTTTTTTTGAAAAACATATTATTTGATAA<br>GAAAGAATCAATATAACCTCGTGCTTTTG      | C         | T       | TAGCTCTAATTGTAATTCTATGATGTATCTCTGT<br>TGAATTTGGGTCAAGAGCTGGTTGTGATATCTC<br>CAAACCTTCTCCTTACAATTTTAAACGTATCT   | NA                         | NA                          |
| Ca-II-SNP83 | 86.94                  | Ca-desi-LG(Chr)1 | 2752133                 | TGACTTCTGTGTGGACGCCTGTGTGGCTGGTTAT<br>ATCCGGATCATATATGTTTAGGAGCATGCATGACT<br>TGCATACATTTTTATGTTATTTTATTTTATG | T         | C       | ATTTTAAAAAATTAGATCTTTAATAGTTCTTAA<br>AGATGTATCAAAGTCATAGAATGTATCTAAATA<br>AATCAAGTAGCAATCGTATAGCAAATAATTA     | NA                         | NA                          |



| Marker IDs  | Genetic positions (cM) | Chromosomes               | Physical positions (bp) | Flanking sequences/Forward primers                                                                           | ICC 12968 | ICC4958 | Flanking sequences/Reverse primers                                                                                                                                | Annealing temperature (0C) | Amplified Product size (bp) |
|-------------|------------------------|---------------------------|-------------------------|--------------------------------------------------------------------------------------------------------------|-----------|---------|-------------------------------------------------------------------------------------------------------------------------------------------------------------------|----------------------------|-----------------------------|
| Ca-II-SNP84 | 89.43                  | Ca- <i>desi</i> -LG(Chr)1 | 2808533                 | TTATATTTTTGAATCTGTTATTATAATACTTTGTAT<br>ATAGTTTTGGATTTCAATTATGGATAAATTAGGAG<br>ATGGGATTTTTCCAGATGAGGTTGTTAT  | G         | T       | ATAATTGAATGAAATAATTATCCAACTCAACCT<br>ATTCCACAATTTGCACACAGTTTTGGTCCTAAA<br>AAGGGATTTCACTGGTAACTAGCAAGAATTTG                                                        | NA                         | NA                          |
| Ca-II-SNP85 | 90.26                  | Ca- <i>desi</i> -LG(Chr)1 | 2843332                 | TCCATCCTAAAAAACTAGTGACTTAACTATTCT<br>TTTACTCTCCTTTATGACAAGATTTTATGACAATTC<br>ATGGTTTTTCTTGGCATAATGTGCATTA    | A         | G       | AAAAAGGAGAATAGTCATCTCTTAATTGCACAA<br>AAAAAGAACTCATAATTAATTTATAATCTTCC<br>TTTAAAAATAAATTAAGGTGTAAAAATGAG                                                           | NA                         | NA                          |
| Ca-II-SNP86 | 91.09                  | Ca- <i>desi</i> -LG(Chr)1 | 2865546                 | AATGATATCAATTTTCTTCTTGCATCTTATGTAATT<br>CCTTATGTTGGTCTTACTGGCTATGTTGGTGCCAA<br>TCCACTCTTGCAAAATGCTACTTCAAGGA | G         | A       | CAATAAGATCATAAGATCACAAGTACATGTCTA<br>CTTTTTGATAAATACTTTTTCTTTTAGTTTGAAA<br>AGTTTTCAAAGATTGAGCTTGAGATTATATACC                                                      | NA                         | NA                          |
| Ca-II-SNP87 | 91.92                  | Ca- <i>desi</i> -LG(Chr)1 | 2898518                 | TGCGTCCATAATTGGTTGGAGCCCAAAGTTGTGT<br>GGTGCGTCCATAATTGGTTGGAGCACACAGATCC<br>TTGCGGGAATTTTGGATTAGTGGTGTGCTTG  | A         | G       | AAGATACAAATCAACCAAAATGCACAATCTATTT<br>GTTGACTATTTGTCAATGCATGATTCCGGAAT<br>ATCACATCCTCCGCAAGGTTTTCGTGGTCTCT<br>T                                                   | NA                         | NA                          |
| Ca-II-SNP88 | 92.75                  | Ca- <i>desi</i> -LG(Chr)1 | 2927971                 | AGCGTGTAATATGCTTCTCATTGCGAACCATACG<br>AACAAATATTGCTTGTACTAACCTCATTACGTAA<br>ACTTCATACGCTTGTTCCTCTTCAATCT     | T         | C       | TTACGGCGCAGAAATACGAACAAGAAGAACA<br>CGCATAAATACGAATGGTTCGTAGGAGAGTAG<br>GGTTTCGAGAAACAAGATGGTTCGCAATGAC<br>AAG                                                     | NA                         | NA                          |
| Ca-II-SNP89 | 95.24                  | Ca- <i>desi</i> -LG(Chr)1 | 2958413                 | TTTGTGAATCGTTGAATGTTGTGGTGGCCTTAGA<br>CATTATTGATTGCTTTAGTTCATTATTGTGTTTTCT<br>TCCTTGAAGTGTGTGGAAGGAGCTTT     | T         | G       | GTAGAGGAATATTATTCAGAGATAGTGAGG<br>GTGCGAATAAGAATAGATAGCATGAGGAACACA<br>CACCAATCTATTATCCTATAATCAAACCTCAAAA<br>T                                                    | NA                         | NA                          |
| Ca-II-SSR49 | 96.07                  | Ca- <i>desi</i> -LG(Chr)1 | 2973501                 | GTTCCGTTCTCCACCTTCAA                                                                                         | (TAT)8    | (TAT)6  | TTTTGCGAGAGGTGTGTGAG                                                                                                                                              | 60.09                      | 146.00                      |
| Ca-II-SNP90 | 98.56                  | Ca- <i>desi</i> -LG(Chr)1 | 3109215                 | TCCATCCTAAAAAACTAGTGACTTAACTATTCT<br>TTTACTCTCCTTTATGACAAGATTTTATGACAATTC<br>ATGGTTTTTCTTGGCATAATGTGCATTA    | A         | G       | GAGAAATAATAGTAAGTGAGAATCTCTACTCTT<br>TGCATGCTCGATCACCCGAAAATTACACAACAC<br>TCCCCCTTATTGATTAATTAACCAAGCTTTTCCC<br>TTACTATATGGTTCATACCCCACTTCTTTTTCTT<br>TTTCTTTTTCT | NA                         | NA                          |

| Marker IDs  | Genetic positions (cM) | Chromosomes      | Physical positions (bp) | Flanking sequences/Forward primers                                                                           | ICC 12968 | ICC4958 | Flanking sequences/Reverse primers                                                                                                                                                                                                                                                              | Annealing temperature (0C) | Amplified Product size (bp) |
|-------------|------------------------|------------------|-------------------------|--------------------------------------------------------------------------------------------------------------|-----------|---------|-------------------------------------------------------------------------------------------------------------------------------------------------------------------------------------------------------------------------------------------------------------------------------------------------|----------------------------|-----------------------------|
| Ca-II-SNP91 | 99.39                  | Ca-desi-LG(Chr)1 | 3141981                 | AATGATATCAATTTTCTTCTTGCATCTTATGTAATT<br>CCTTATGTTGGTCTTACTGGCTATGTTGGTGCCAA<br>TCCACTCTTGCAAAATGCTACTTCAAGGA | T         | C       | TGTACATGAGAATTTGTTTAAAGCACAAAAACAA<br>AAGAGACACTCTCTCTTACATAGAAAACATCAA<br>ACCAATTAACCACACCCCTTCTCCTCCATCAA<br>CCAAAACAAAACAAAACACCTCCATTTTCGTTTT<br>TTCATTTCATCGATGGCGGACGTGCTTTCTCAA<br>AGGCAAAACACCATCAAAGAAAGAACATCGA<br>GTCTTTACTTGGTTCGATTCGAAATGGGAAGC<br>TCCTTCCCATCCAACTTTCCCAAGCTTACT | NA                         | NA                          |
| Ca-II-SSR50 | 101.05                 | Ca-desi-LG(Chr)1 | 3165102                 | CTGTTTTCTCGTTGCACCT                                                                                          | (TA)12    | (TA)11  | TCCATAAAGAACCAAGCATATCA                                                                                                                                                                                                                                                                         | 60.29                      | 134.00                      |
| Ca-II-SNP92 | 101.88                 | Ca-desi-LG(Chr)1 | 3192156                 | TAGGATAAGAGGCCATGTAATTGATTGCACAACT<br>CCATATTTAAATTAGTATTCCTTCTTATAAAATG<br>TACCCTTCTATTCCCAATTTGTTCCCA      | A         | G       | ATGGAGATTGCTCAAGTATCCAGATGATATTG<br>ATCATGCAGTTTTAATAGTAGGTTATGGATCAA<br>AAGGTGATGAAGATTACTGGATTGTAAGAATT<br>C                                                                                                                                                                                  | NA                         | NA                          |
| Ca-II-SNP93 | 103.54                 | Ca-desi-LG(Chr)1 | 3270298                 | TGCGTAGCATCTCCCTTACCTTTCAATCCTTAAT<br>AAGTATAGTCTTACTACTGTTACGAACCATAGAC<br>TGACCGCTTAAAAATGTATTAATCTCCCTC   | A         | T       | GTTTAATTATTGAGAGTATTATTGAAAAAAATT<br>AGATATTCTAAAGTGAAAATTATTTGAGATGGA<br>GAAATATTCCAAACATGACATTTATAATGATAC                                                                                                                                                                                     | NA                         | NA                          |
| Ca-II-SNP94 | 105.20                 | Ca-desi-LG(Chr)1 | 3329312                 | ATCCTAGATTAGTAATCCACTTAATGTTCACAATT<br>CATGATAACTGTAGGCCTAAAATGTCTCATGCA<br>ATCATTTCAATTTACTATAATTCGTTCTG    | T         | C       | TTTATGAATTTGTTGGTAAAAAGTAATATGATGA<br>CCCGCACAAATGTCCCAATAACACACATGTCT<br>CCATCTACTCAATGCAAGGAAATAAAAAATGCA<br>A                                                                                                                                                                                | NA                         | NA                          |
| Ca-II-SNP95 | 107.69                 | Ca-desi-LG(Chr)1 | 3635583                 | TCACAGCAGGACTAGTTATAGCATTTAGTCTAAT<br>TGGATCCTATCTTTTGTGATTCTAGCTGTGCACC<br>CTTGTTGCTCATACAAGGATACATTCAAAC   | A         | C       | AAAAAACAAATATATAAGTATACTTTCTATTGAT<br>GGAATCGACGAAAAAATTGTTCAATAGGCCAAC<br>CTTTGCATCAGAAGTGAATCCTTTGAGAACTT                                                                                                                                                                                     | NA                         | NA                          |
| Ca-II-SNP96 | 110.18                 | Ca-desi-LG(Chr)1 | 3654198                 | ATCCTAGATTAGTAATCCACTTAATGTTCACAATT<br>CATGATAACTGTAGGCCTAAAATGTCTCATGCA<br>ATCATTTCAATTTACTATAATTCGTTCTG    | C         | T       | GGAAGACAAAACACGACAACATCAAAGAACTA<br>GAGTCTTCTGTTAAAAACAGAGGAAATCTTAG<br>ACCCAAAAGATAGTGGCATTAAAATAAATGGC<br>TAAGTTTATTTCAAGTTATGGTACTCAAATTTT<br>GTTTATGAGGAGTCTTTTCTGGGTTTTTATT<br>TTATTATCACATATTTCTTCCAACCTTGCAACAT<br>GTGGCTCCGTAGTAAAGTTCTTCTCTGG                                          | NA                         | NA                          |
| Ca-II-SNP97 | 111.01                 | Ca-desi-LG(Chr)1 | 3693177                 | AGTTGCTCCTCCAGCGTGAATTAATTAACCTCCA<br>GTTTTTTGTGGGTTACCGTTGGAGTTGTGCAAG<br>ATGTCATCACGGTATTGTCAGGAAGGAACG    | G         | A       | GTTAACGGCTATAAATTAATAAAATGATAAAT<br>TTATTATTAATAAATTAATAAAAGGTAGCGG<br>TTATAATTTATTATTATAAATTTGTAAGCA                                                                                                                                                                                           | NA                         | NA                          |

| Marker IDs   | Genetic positions (cM) | Chromosomes      | Physical positions (bp) | Flanking sequences/Forward primers                                                                           | ICC 12968 | ICC4958 | Flanking sequences/Reverse primers                                                                                                                                                                                                                                                               | Annealing temperature (0C) | Amplified Product size (bp) |
|--------------|------------------------|------------------|-------------------------|--------------------------------------------------------------------------------------------------------------|-----------|---------|--------------------------------------------------------------------------------------------------------------------------------------------------------------------------------------------------------------------------------------------------------------------------------------------------|----------------------------|-----------------------------|
| Ca-II-SNP98  | 111.84                 | Ca-desi-LG(Chr)1 | 3734425                 | TTTTTTGGTTGTATTATTATTAATTAACATAAG<br>ACAAGTCTCCTTACATTCTTTCACTCAACTTATT<br>TTCTTCCTCCTACATCTCCTTAGCTTC       | T         | C       | ACATAAACAAAAACAAAACAGTACCTTTTTTTT<br>TTTTGTATGTTTCATATGTAAGTGTTCATTA<br>TTCCAATGCCTAACGTTACCTTTTGAATGAAT<br>GAAGTATAGAAAGTGAAAGTTAGAAGCTTTAA<br>TTGTTATTGAAGGTGAAAGGAAGAGTGGTGGTT<br>GGATTGAATCAAACCCAGATGGATTTTTCTTC<br>TTTCTTAACCTCTCTTGGTACTTCTTTTTGATA<br>TTTATCTTTTTCATCATTTTCTTCTTCTTCTTAC | NA                         | NA                          |
| Ca-II-SNP99  | 112.67                 | Ca-desi-LG(Chr)1 | 3754453                 | TGCAGAAGCAGAAGCTGACAAAAACATTGTTGGA<br>ATCCATGCTGCAATGGGAAGTGCAACTGGCATGA<br>ATATCTTCCTTCGCAGTTTCCCTTCAAGATGC | G         | A       | TGGGAGACCTAGAAAAATGGGAAGAGAAGTCT<br>AAATGTCCAATCTGTTGGAGTTTACTACATTCT<br>GCGGTTTCACTCACATGCAATCATCTTTCTGC<br>AACTCGTGTATAATTAAAGTCCATGAAATCTTCAT<br>CTTCTGTCTGTTTGTAAATACCTTCACTC<br>GTCGAGAGGTTTCGTCTGCTCCTCACATGGAC<br>AACTGGTTACCATCTACAAAAACATGGAAGCT<br>CCTTCGCAATCAATTTTCTTCTCACTCAAAAT    | NA                         | NA                          |
| Ca-II-SNP100 | 113.50                 | Ca-desi-LG(Chr)1 | 3867644                 | AGAAGTGTGAGACTGATCCTTACAGAGTGGAA<br>GACATGGATATGTACTCCAATGTGCTATATGCTAA<br>GGAATGCTTTTCGGCTTTGAGTTACCTTGCA   | C         | T       | AAATATACAAGTACTTTTTCATGTTGCCCTTCA<br>AACTGTAATAATTTCCCAATAATACAACAAGATT<br>AGGTCGTATTTATCAGTCATGAATACTCTAT                                                                                                                                                                                       | NA                         | NA                          |
| Ca-II-SNP101 | 114.33                 | Ca-desi-LG(Chr)1 | 3888320                 | TTTTTTGGTTGTATTATTATTAATTAACATAAG<br>ACAAGTCTCCTTACATTCTTTCACTCAACTTATT<br>TTCTTCCTCCTACATCTCCTTAGCTTC       | T         | C       | GATCAAAATATCCCAACTGAAATGCTAGTTAT<br>TTGCTTCAGTTTTTGGTATAAGTTACAAACAAAT<br>CAGTAGAAGAAAGTGAATTTAATCATAGCAATA                                                                                                                                                                                      | NA                         | NA                          |
| Ca-II-SNP102 | 115.16                 | Ca-desi-LG(Chr)1 | 4001436                 | TGCAGAAGCAGAAGCTGACAAAAACATTGTTGGA<br>ATCCATGCTGCAATGGGAAGTGCAACTGGCATGA<br>ATATCTTCCTTCGCAGTTTCCCTTCAAGATGC | T         | A       | TGCAAGAAGGATGAGTAAAGTGCACAAAAAGG<br>CTTAAGACCTTACAAGCCAGACCTGCAGCAAA<br>TGTAACAGCATGCTGTTCTGCTATCCCGACATC<br>AA                                                                                                                                                                                  | NA                         | NA                          |
| Ca-II-SNP103 | 115.99                 | Ca-desi-LG(Chr)1 | 4998121                 | AATCATGTTCTCTTTGGTTGGATTTTGGAGCAT<br>TCTTCTAAAATATGTTTTCTATCATACTTCTCAAT<br>TATGTGATTTACTTTCTCAAATAAGGAA     | G         | A       | CACTTAACAAGAGTCACTCGTAGAGAAAAAATT<br>GCATAGTTGCACTCCTTCCAAATTTCCAAAAA<br>GAAGCTAATCAAATCACTTGCAAGTAATTCTTG<br>A                                                                                                                                                                                  | NA                         | NA                          |
| Ca-II-SNP104 | 116.82                 | Ca-desi-LG(Chr)1 | 5016574                 | ATATCCCTTCTTAGATCCTTTCTTGTAAATTTCT<br>TTCAAACCTTGCCACCTTCTGTCTGCTACGCGC<br>CTTGATGTTGCTATAATTAATCCAACAT      | G         | C       | TATCTAATTAATAAATTAAGATGAAAAATTAAGAT<br>GAAAGACATATATATTCAAATATATTTTTATTAT<br>ATTTTGGTGATTTTTGTTGTTTACGATAA                                                                                                                                                                                       | NA                         | NA                          |
| Ca-II-SNP105 | 117.65                 | Ca-desi-LG(Chr)1 | 5041011                 | CTAACTAATTGTATCTCTTAGTTTGGAGATTGAA<br>TCTGTAAGTACTGTGTTTTGGAGTGTATACTGCA<br>ATACTAAATGGAACCTCATTTACTGTGTA    | G         | T       | ACTACACACTCAAATAGTGGAAATTAACCTCTT<br>GCAAAATGCAAGGTAAACAAAAACAATATATA<br>GATTCACCTTTCCATATGATGCATGGTTATCA<br>A                                                                                                                                                                                   | NA                         | NA                          |

| Marker IDs   | Genetic positions (cM) | Chromosomes      | Physical positions (bp) | Flanking sequences/Forward primers                                                                            | ICC 12968 | ICC4958 | Flanking sequences/Reverse primers                                                                                                                                                                                                                                                       | Annealing temperature (0C) | Amplified Product size (bp) |
|--------------|------------------------|------------------|-------------------------|---------------------------------------------------------------------------------------------------------------|-----------|---------|------------------------------------------------------------------------------------------------------------------------------------------------------------------------------------------------------------------------------------------------------------------------------------------|----------------------------|-----------------------------|
| Ca-II-SNP106 | 118.48                 | Ca-desi-LG(Chr)1 | 5101106                 | ATCATATTGTTTTACTATTTTCTTACATATTTCTTA<br>GCTGTTATTCTCACCATTCTTTAGTACTTTAATCAA<br>TATAGAGCCTTTTAAATGGGACCCCTTGT | T         | C       | ATAGACTTTGATCAATAGCATGCCAAAGCAACA<br>TTTTAAATAACACCTCCATTTTTGGGTGCGCAT<br>GTGAAACCCCAAGGAAATACTGGTGATTCTTT<br>T                                                                                                                                                                          | NA                         | NA                          |
| Ca-II-SNP107 | 119.31                 | Ca-desi-LG(Chr)1 | 5117310                 | ATTTGGAACAAGTCTAGCTTTGAATTTATCAATG<br>CTAGCATCAACTTTTCATTTTCTTTAAAGATCCAT<br>TTACAAC TTATGGTTTGGATCCAGGTGG    | G         | A       | AAGAGGAAATAAAGTCTCAAGACTTTTCCTTTT<br>GGAAAGAAGTCATCCAAGAGGAAATGGACTCA<br>ATTATGGGGAATAAACTTGGAAATTAGTAGAC<br>CT                                                                                                                                                                          | NA                         | NA                          |
| Ca-II-SNP108 | 120.14                 | Ca-desi-LG(Chr)1 | 5178186                 | TGCTTTGTCAAGGAAGGGGAATACATATGAGAATC<br>CTCTGGCTGCAAAATGAAGAACACCAAACCTCCT<br>TCTCACCCACCAGGCTTTACCCGACTACC    | C         | G       | TGTGATTGGTTTGGGTTTTGGGGTTGACGAC<br>TAAAGGTGGAGTATAACTGGGTGGAAGACCAT<br>ACATAGGAAATTGCATAGTTGTTGTATGAGGTT<br>GTT                                                                                                                                                                          | NA                         | NA                          |
| Ca-II-SNP109 | 120.97                 | Ca-desi-LG(Chr)1 | 5217919                 | TCTTAACTTCTAACTCAACTGATAAATGTCGATACT<br>GTTAAGTTAGATGCTTTGTTTCAGATTCGAATCCG<br>AGACCTCGCAGTTGTGTGAATTAATTTTG  | A         | C       | TGGAACAGCAAACAAAAAGAAAAAATAATCTT<br>ATTTAAATAAATAACTAAGGCTTGTGATAAAT<br>TATATATATATTTAGAAGATGATAAATCCA                                                                                                                                                                                   | NA                         | NA                          |
| Ca-II-SNP110 | 121.80                 | Ca-desi-LG(Chr)1 | 5260586                 | TGGTTAGTAAGATAACCATTGTAACAACCGTTTAT<br>TATAGGCAGCATTGGTCATGCTAATCCTATCAT<br>TTGGCAAATGGTTTTGTCAAGTAAACCGGT    | C         | T       | CTTCTTCTTAGTTCTTACTTACAACTATTCTTT<br>TCACTCTTACATTTTTCCCATCTTTTTCACTC<br>ACTCACCAAATCTATGGACCCACATCCTCCTA<br>TCACCGCGTTTTCCACCCTCCTCCGACCGCT<br>TACTCGCTGCTTCAATTCCTCTCCTCCTCCA<br>CCGCTGCCACCACCTCCTTCGCCGAAGAGCTC<br>AACGAAGCCGAACCTTTTTGGTCATCCGATAGC<br>TCCAAATCTGAAATGACCCGACCCGACG | NA                         | NA                          |
| Ca-II-SNP111 | 122.63                 | Ca-desi-LG(Chr)1 | 5382171                 | CACTGAGTTTCATTGTGAAATGGAAGGAATTGA<br>GTGATTTTCTCAGAGACTCCGCTGTACTTGCATT<br>CCATCAAGCGGAGCTGCTCTGAGGTACATGT    | T         | G       | TTTTTGTGAATTACAGACCAGCATGTTTCATTT<br>CTTGTTATGTGGATGATGCAGTTGCTCTCCTGA<br>CTGAGCGTTTGTCTTGGACCGCTCTCTCCCAA<br>CACCCTCATGTTTTTCAGGCAAACCTCCATCA<br>ATTCAAACAAAAGTAAAGCTACCACTAGAGATA<br>TGCT                                                                                              | NA                         | NA                          |
| Ca-II-SNP112 | 123.46                 | Ca-desi-LG(Chr)1 | 5667198                 | GAGACAGTGGTCCACCGGTTAGTTGACGATTCG<br>GGTTGTCTCTCAATTGGCTCTAGATACCATGTTGA<br>ATATAAAGAGTATTGAGAGACATTGAATAAC   | T         | C       | GGGCTGTAAGTATTCGGCCCGTTAGTATTACT<br>GTAATTAGGGTTGCTTAATACTTTTGTCTATA<br>TAAAGAAATTCGGTTGTAGTTGAAACACACG                                                                                                                                                                                  | NA                         | NA                          |
| Ca-II-SNP113 | 124.29                 | Ca-desi-LG(Chr)1 | 5701969                 | TATTGTATGGATTTGCTACTATTTGAAGTTTTTA<br>GTTGTTTTATTGTTTTGGAGACTGTTCTGGAGGT<br>GTTTAATTGTTTTAGTGTGATTTTGCTC      | G         | A       | AGGACCAGGGAAGATTCACAAGATCATGAATC<br>GTGAGATCGTAAAATCCTACCAAATTTGGGGTC<br>ATTAGATTCATAAAACAACATAAACTGAGAA<br>CA                                                                                                                                                                           | NA                         | NA                          |

| Marker IDs   | Genetic positions (cM) | Chromosomes               | Physical positions (bp) | Flanking sequences/Forward primers                                                                           | ICC 12968 | ICC4958 | Flanking sequences/Reverse primers                                                                               | Annealing temperature (0C) | Amplified Product size (bp) |
|--------------|------------------------|---------------------------|-------------------------|--------------------------------------------------------------------------------------------------------------|-----------|---------|------------------------------------------------------------------------------------------------------------------|----------------------------|-----------------------------|
| Ca-II-SNP114 | 125.12                 | Ca- <i>desi</i> -LG(Chr)1 | 5732484                 | AATCCTTTGTGACCATAATGACGAGTTCATATGTG<br>GTTTCTACTGCAATGTGGCAATCTGTAGCTCCTTA<br>TTTTCTGAAATGTGGACTTTTTGCAGTGGT | A         | G       | AAAGTAAACTGAGTATAACATTTCTTGATCATG<br>GAAGGGAGGGTTAGAGAGCCAGTTTAAAAAAT<br>AACATTACAAATCCCTTTATCACGAGCCAATAA<br>AA | NA                         | NA                          |
| Ca-II-SSR51  | 125.95                 | Ca- <i>desi</i> -LG(Chr)1 | 5754943                 | CCTCAATGAAGGGAGTTCAAA                                                                                        | (TAA)11   | (TAA)10 | TTGTCTGGTCAGCTTTCTGC                                                                                             | 59.16                      | 186.00                      |
| Ca-II-SNP115 | 126.78                 | Ca- <i>desi</i> -LG(Chr)1 | 5759582                 | GGATCTGGAAGTGGCAGTGATGGAATATATTAGA<br>TATATCCAAATTGTCTCAAACACCTCTATGGTCGA<br>TATTTCACTACCGTGTGCATAATCGAAGGT  | A         | G       | ACATATTATTGATGCATTGACACTTGCGAATGC<br>TATATGGAGACCATGGGAGAATCATAGGGGTG<br>TCATTCCCTTTGATGATATCATGCTTTATACTGG<br>T | NA                         | NA                          |
| Ca-II-SNP116 | 127.61                 | Ca- <i>desi</i> -LG(Chr)1 | 5815163                 | ATCAGACAGAGAAGGAAAACAAGAAATATTTTT<br>TTTACAAAGTTTTCTCGTGTGGTTCCTAAGC<br>GCAGTGTCTTCCCCCATGCCGCTATTG          | A         | G       | GACACAGTGAACATGATTACGACTAGTTCGTT<br>GTAAAACGACATTTTAACTATCAAATGAATATT<br>TACTGCTGCTTGAAGTTATTTACCCTAGTA          | NA                         | NA                          |
| Ca-II-SNP117 | 129.27                 | Ca- <i>desi</i> -LG(Chr)1 | 5854373                 | TGGTTAGTAAGATAACCATTGTAACAACCGTTTAT<br>TATAGGCAGCATTGGTCATGCTCTAATCCTATCAT<br>TTGGCAAATGGTTTTGTCAAGTAAACCGGT | T         | C       | GTTTGATATTACATTACAATTTATTTACACAATG<br>CAAAGATAAATAAAAAGCTGAAAACAGCTGTA<br>GTTAAACAAAGTAGCAGCAGAACATGATAATCA      | NA                         | NA                          |
| Ca-II-SNP118 | 130.10                 | Ca- <i>desi</i> -LG(Chr)1 | 5898347                 | CACTGAGTTTCATTGTGAAATGGAAGGAATTGA<br>GTGATTTTCTCAGAGACTCCGCTGTACTTGCATTCT<br>CCATCAAGCGGAGCTGCTCTGAGGTACATGT | A         | T       | TGCAATAAATAAATGCCAAGCACCAACAAGAAC<br>AAAAAGACATAATACCTCGGAGGCCGAATAACG<br>AAATTGATGAATTGATCAATCATATTCTTGCTTC     | NA                         | NA                          |
| Ca-II-SNP119 | 130.93                 | Ca- <i>desi</i> -LG(Chr)1 | 5970900                 | ATAAGAAGATACATGCCTTTTCAGATACCGATGAA<br>GACAGAGACGGTGGTTCGCGGTGGAAGTTGAAAC<br>GGCGGTGATGCTTTCTGTTCTTCTTCTTCT  | T         | C       | AAAACTCTATAAATACATCCTTTTTTACAAAA<br>GGGGGAGACATTTTTGAGGGGGAGAAATCGGA<br>GATTAATACTGATAAGAAACATAAAAAAGAAA         | NA                         | NA                          |
| Ca-II-SNP120 | 132.59                 | Ca- <i>desi</i> -LG(Chr)1 | 6029621                 | TTTTTTCCCTCTCCATGTCTTGACCGCCTTGGTG<br>CCTCGTCTTCGCTTTCACATCTTTCCTCTGAAG<br>TTGTTTGACAGGAGCCCCACTTTGCTGATAC   | T         | C       | CAAAGAACAATGATCGGAATGATAGGTACAGT<br>TCGGGACAAGAGCAAGGTAAGAGTCAAGACAT<br>GCTCAGTCAAAGTGGGGTCTGACGATGAAA<br>TGC    | NA                         | NA                          |

| Marker IDs   | Genetic positions (cM) | Chromosomes               | Physical positions (bp) | Flanking sequences/Forward primers                                                                          | ICC 12968 | ICC4958 | Flanking sequences/Reverse primers                                                                              | Annealing temperature (0C) | Amplified Product size (bp) |
|--------------|------------------------|---------------------------|-------------------------|-------------------------------------------------------------------------------------------------------------|-----------|---------|-----------------------------------------------------------------------------------------------------------------|----------------------------|-----------------------------|
| Ca-II-SSR52  | 133.42                 | Ca- <i>desi</i> -LG(Chr)1 | 6033499                 | ATACATAATTGGGCCGATGC                                                                                        | (AT)11    | (AT)10  | GGAACCAGAATTAGAGTTGAAGAA                                                                                        | 59.65                      | 150.00                      |
| Ca-II-SNP121 | 134.25                 | Ca- <i>desi</i> -LG(Chr)1 | 6088473                 | GATTTTCTATTCAAATTGGTGGTCCCGGTGCATT<br>TTATTCCTAGACTATAAGACCCAACATCAAGTGG<br>ATGCACCTTGCCCCAAAATTTGGAGACAGT  | G         | A       | GGCTTAAATTGCAACTACACTTCCAATCTCTA<br>CTGATCAGAAATGGGACTTCTTGGAAACAATGA<br>TTAGCAGAGTACCAACAAGGCTATGAACACA<br>A   | NA                         | NA                          |
| Ca-II-SNP122 | 135.91                 | Ca- <i>desi</i> -LG(Chr)1 | 6115794                 | TTATTTATTTTCTCGCTTCTTTTTAAATAATTTGC<br>TTTTTTTATTGGCATTGTAAAGTTCTCATTAGTTA<br>TTAGTTATTGAGCATATATTCTACTTC   | C         | G       | CATTAATAAATAATTGATAAATAAGATCAGGAG<br>AATAATGATTTTATCATATTATTTTATTAGTCTT<br>TGGTTTATTTAATATGACTATTATCTTAGGA      | NA                         | NA                          |
| Ca-II-SNP123 | 136.81                 | Ca- <i>desi</i> -LG(Chr)1 | 6122870                 | CATTTTATTCAAAAACAAAATACTTGTTGTTTGA<br>CCTAATCACATTTTATGTGTAGGATGATTTGGGTC<br>ACTTATATAGAATATCTCTTTTATCTTT   | C         | T       | GTTAAACTATTGATCTTTTATGATAAAAAAATAT<br>ATATTTTTAATAATAAAAAAATAATGTATTATT<br>CAAAGCTAACATATCAATATTTTTTCATGA       | NA                         | NA                          |
| Ca-II-SNP124 | 138.61                 | Ca- <i>desi</i> -LG(Chr)1 | 6140856                 | AGATGAAAGTTCGTGTATCTTCTGCTCAAATTC<br>CAATTGCTTTTTATCCTCTACTAACTCCTGAGAC<br>ATCTGATCAGCAAGACGTTTTGCTTCCATG   | G         | A       | GTTGAAAAACAGAAGACTGCTAGGGAAAATCG<br>GCGTGCAGATGAGGAGCATGTTAAAGTAGAGG<br>AGCAGAAGAAGCTTCTGAAGATAACAGGAAA<br>AGCG | NA                         | NA                          |
| Ca-II-SNP125 | 139.51                 | Ca- <i>desi</i> -LG(Chr)1 | 6161052                 | ATTGGTGGCGTATATATTTTATTGGGGGTGAGAT<br>GTTGAGGGTGATGAGGTAGATGTCATTGTAATAT<br>GTTTCTTTGGGAGAATGAGTTGGTGGTAAA  | A         | G       | AATCATATTTACATAGTACACCAATAGTAGA<br>ATTTTTCCAAAGCAACAAATCATTGATGATCC<br>TGCAAGTGAACGTTAGCTAACAAAACACACG          | NA                         | NA                          |
| Ca-II-SNP126 | 140.41                 | Ca- <i>desi</i> -LG(Chr)1 | 6173569                 | TTAATACTACGGTAGTTTTTTTTAAGTCTCATAAT<br>TTATTGTATTTATGTATAAACGATACAAGTTTTATT<br>GAGTGAGTGGATAAGTTACTGCGTCCTT | T         | C       | AATTGGCGCATGGATCTATTTGACAGATGAAAT<br>TCAAATTAAGGACGATTTTCTATTTCAATAAA<br>TTCAAATATTAATTGATTGATAATTCAAATT        | NA                         | NA                          |
| Ca-II-SNP127 | 141.31                 | Ca- <i>desi</i> -LG(Chr)1 | 6184142                 | CATATTGGCGGCTGAATTGATTACTGACTCAAAGA<br>TGCGTGACCTTACCTTCGACGTTTTTTTTACTGA<br>ATTATATTAGATGTTATCGAAACTATTTTC | T         | A       | CAGATAATTTAAATTATATTATAGATACAAAAT<br>AACTGATCTCCTTCGAGTATGCTATGTTAGATT<br>TTTTTAGTGAATTTTTTTGATGATTAAGATA       | NA                         | NA                          |

| Marker IDs   | Genetic positions (cM) | Chromosomes               | Physical positions (bp) | Flanking sequences/Forward primers                                                                           | ICC 12968 | ICC4958 | Flanking sequences/Reverse primers                                                                               | Annealing temperature (0C) | Amplified Product size (bp) |
|--------------|------------------------|---------------------------|-------------------------|--------------------------------------------------------------------------------------------------------------|-----------|---------|------------------------------------------------------------------------------------------------------------------|----------------------------|-----------------------------|
| Ca-II-SNP128 | 142.21                 | Ca- <i>desi</i> -LG(Chr)1 | 6200464                 | ATTAATATACCATCAGTATCAATGGCTCAAATATTA<br>ATGGTTCAATTATTGGTGCCAATCCTACTTGTGTT<br>GTTGGTAGGGGCAGGGGCTAAACCTGAGC | C         | G       | TCTACAATCCATAGTACAATCATAAGGACAATC<br>TTTAGGACAAGCATACACCACATTGTAGCAATA<br>TTTGTACTTCTTTATCTCGCACTTTGCATACCCT     | NA                         | NA                          |
| Ca-II-SNP129 | 144.91                 | Ca- <i>desi</i> -LG(Chr)1 | 6310910                 | TATACTGAACTCTGCAACGGTGGCTATGATGCCAA<br>AGACTTTTCGTGTGCTTTTCGACACTATTACTCAG<br>GAATGGACGAGCCTCTTGACCACTAAATTA | A         | T       | TAACAACACACTTTTTATCCAGTTTCATTGCATC<br>AAATTAATGGTCTTACCATACAAGAAAACAATA<br>CATAAAGAAGTTACATGATCTATAAGAATACT      | NA                         | NA                          |
| Ca-II-SNP130 | 145.81                 | Ca- <i>desi</i> -LG(Chr)1 | 6397062                 | GCAAGTAATCATTAAATAATTCACATGCTTTTTTTT<br>CTTTACAGGTTTCTGCTGCAACTACCACAGACAAT<br>AGCTGTGAGTCTGTGGTAATGAGTGGTCA | A         | T       | CATAACATAAAATCAATTCATGATGCAAAAAAAG<br>TTTGACTGACCCAGCTGGGTTGTTGGCATCCC<br>TTTGAGGATGCTGAGTTGGGTTTTGCTGTTGGT<br>T | NA                         | NA                          |
| Ca-II-SNP131 | 148.51                 | Ca- <i>desi</i> -LG(Chr)1 | 6745622                 | ATGATGTTTTAACATGTGGTTCCAAATGTTATTTT<br>TTGTTGTTTTGTCTTAGGTTCTTCTGAAACGCT<br>TGATGGCAAGCTTTTGAATTTCTGCGG      | C         | T       | ATGATACATTTGCTAATTAACAACCAATAGTCC<br>TTATAATGTACTAGTAGTAATAACCATAGAATCT<br>ATGCTTAAGAACAGCAAAAATGATCACCACAT      | NA                         | NA                          |
| Ca-II-SNP132 | 149.41                 | Ca- <i>desi</i> -LG(Chr)1 | 6773488                 | AACGAGACCCAATAGCACGTTTTCCAGGAGGAAG<br>AGGTAATAATCCCAAAATTTGGTTTTGTGCAATG<br>CAGAAAGTTCTTCTGCCATAGCCTGCTGCCA  | T         | A       | TTGTCTATTCCACTTACTCAACTTCATTTGTTTC<br>TTTCTTAACCTCTATTACAGTTTGTCTGAGCC<br>CTCTTCTATAAAGAGGTTGTCTTGATCCTCT        | NA                         | NA                          |
| Ca-II-SNP133 | 150.31                 | Ca- <i>desi</i> -LG(Chr)1 | 6829116                 | AGCTAACATGTAGGTCATGTTGCTAAATTTGATC<br>CCTACTTTAACTCTCTACACGAATTAAGGATCCT<br>TTTATCACTTGTGACTTGCATGTTATTGA    | A         | C       | TACACTCACCTCCTTAATATGAATGAATAAACAC<br>AAACATACCAATTAATCTCTCATTGATGATAGA<br>AGTCAACCCCAATGAATTGATAACCAACGAAA      | NA                         | NA                          |
| Ca-II-SNP134 | 151.21                 | Ca- <i>desi</i> -LG(Chr)1 | 6862783                 | TTGATTTATTTAGGAAAATTTGCTTGAGCAGGAG<br>AAGGATTTGCCATGATGCTGGAACAGCATGGC<br>TGCCCCACACATTGCTGGAATTGCTGCTCTT    | T         | A       | TGTGCTAGAATTGGGCTTCTGCTGTCTAGA<br>GTTGTTGATGTTGTAAGCAAGGCTGATTTAATG<br>GCTGCAGGGCTCCAACGTGGATGTTTCTGCTT<br>TA    | NA                         | NA                          |
| Ca-II-SNP135 | 152.11                 | Ca- <i>desi</i> -LG(Chr)1 | 6918109                 | AAATTCTCGCATTCTACATCACAGTAAGAACTTC<br>TTGATTCGCCATCGTGACATTCTCCTCTTTATGG<br>TTGTGTGTTATTTTTCCATTTACTTCTCAT   | T         | G       | TTGAAACTTTCCCATGGCTTGCTGTTGCAACA<br>AAAACATACACAGAGGAAGAGTTAGGGTTTCAA<br>AATAAAATTGGGTTTTAGTTTTTTTAATCAATT       | NA                         | NA                          |

| Marker IDs   | Genetic positions (cM) | Chromosomes               | Physical positions (bp) | Flanking sequences/Forward primers                                                                              | ICC 12968 | ICC4958 | Flanking sequences/Reverse primers                                                                                                                                                                                     | Annealing temperature (0C) | Amplified Product size (bp) |
|--------------|------------------------|---------------------------|-------------------------|-----------------------------------------------------------------------------------------------------------------|-----------|---------|------------------------------------------------------------------------------------------------------------------------------------------------------------------------------------------------------------------------|----------------------------|-----------------------------|
| Ca-II-SNP136 | 153.01                 | Ca- <i>desi</i> -LG(Chr)1 | 6942682                 | TTGATTTATTTAGGAAAAATTTGCTTGAGCAGGAG<br>AAGGATTTGCCATGATGTCTGGAAGTGCATGGC<br>TGCCCCACACATTGCTGGAATTGCTGCTCTT     | T         | C       | ACTGATAATGTATAATATAAAAGAAAACTATGG<br>GGCCTAGGTTAGAGCTCCTAAAGAATGAGACA<br>AAAGGGTAAATTTACAAATCAGGAGAAAGAACT<br>AGTATACAAAAAGAATGACACTAAACCACAATT<br>TCTAATCTACAAATCGGGTATATTTTGGGAGCA<br>TATACAAAAGGGTGACAGACATAATAATTT | NA                         | NA                          |
| Ca-II-SNP137 | 153.91                 | Ca- <i>desi</i> -LG(Chr)1 | 7046558                 | AGAAACGACGAGCAGTGACAACGGCGCGCAGTG<br>ACGACGGCGAGCAGTGGCGACGGCGAGCAGCGA<br>CCACGACGAGCAGCGACCACGAGAGCAAGTGA<br>C | C         | T       | AAGAATAAAGATTGATGAATGAAACACATAGAA<br>ATAAGATTAAGAACTTGAACCTGCGCCTGACGT<br>TATCCTGGTCGTCGTCGTTGTCATTGCTCGTCC<br>T                                                                                                       | NA                         | NA                          |
| Ca-II-SNP138 | 154.81                 | Ca- <i>desi</i> -LG(Chr)1 | 7062230                 | CGCCACCCTGTAACCATTCTGTATAGATTAGCTC<br>GTTCTTTTCGTTTGTGATGACGGTTGCCCCATT<br>TTTTGGTACCCTTGAACGGGGCTCACCCA        | G         | T       | AACACCAAAGAAGATGGAATCTGACAATGAAAT<br>AATTGATTAGGAAAAAGTGGTAAAGCTCATAG<br>AAGCTGGTCTCATTACTCCATCTCAGATAGCT<br>C                                                                                                         | NA                         | NA                          |
| Ca-II-SSR53  | 155.71                 | Ca- <i>desi</i> -LG(Chr)1 | 7137592                 | AACCTTCTCATGCACAAAATCA                                                                                          | (AT)14    | (AT)17  | TGGAGGTTTGTCTTTTCTTTTGA                                                                                                                                                                                                | 59.62                      | 176.00                      |
| Ca-II-SNP139 | 156.61                 | Ca- <i>desi</i> -LG(Chr)1 | 7141328                 | CAAAAAAATACTTCTTTTCTCAATAGCCTAGTAC<br>CTCTTTCATCGGAAGTAACTTTTATCAACAAGTA<br>GTTTGGCATTCCACCCTCCAGTGGCGGAT       | C         | T       | TATAGAAGGTTTTATGGCAGCTTAAAAATAAAAT<br>AATAGTATTATCCAAAGGATTTTTCGTTTTCCTG<br>TGGGGCAAGAGCCCCCATTAGTTACACAGTG                                                                                                            | NA                         | NA                          |
| Ca-II-SNP140 | 157.51                 | Ca- <i>desi</i> -LG(Chr)1 | 7166394                 | CGCAGATGACAATAAACCTTAGTATCTTCCTTG<br>TCAAGCAATCCCTATCTCTTTACCTGTTATTGTGC<br>TAGGGCTTCCCTTCTAACAGCAAAATAGGCC     | T         | A       | GTTGCAGTGTCTTTGATATTTCAAATTAGAAAA<br>TAAAAGTTACATTGTACAAGTGTTTTTTAGGAAA<br>GATTTTTGCTCGAAAAGACTTAGCGCTTGGTC                                                                                                            | NA                         | NA                          |
| Ca-II-SNP141 | 158.41                 | Ca- <i>desi</i> -LG(Chr)1 | 7204364                 | TCGTCTTCTGCTGCTGCACATTATTGTCTGACA<br>GTAATGGCCATTATGGTCATAAACTGCTCATTTC<br>TGCTGAACCGTTTTCTCCTATGAAATTCT        | G         | T       | TAGTAAGAGATTGTGAGTAGGAATGTGTGTGTA<br>AAACTGAGTATTTGGTAATTTTTATAGTCTAG<br>GTGCCCTCATGAGCTTTAATTACAAGAAACCAT                                                                                                             | NA                         | NA                          |
| Ca-II-SNP142 | 160.21                 | Ca- <i>desi</i> -LG(Chr)1 | 7282702                 | GGCAGGCATGTTGGGGTCGTAATCCCTCAGGTGG<br>GAGAAATACAAGCAGCAAAATGGCCAAACAAGCT<br>GCATTGGGATTTGTTAAACGGACATTGGAGCG    | G         | A       | CTAGACGAACAATACTAAGCTGGGAAGAAGCA<br>GCAAAGAACATATCCTTGAATGAAGGTTGTTG<br>AAGCAGCTTGGCTGTATCTTCAAATTGACGG<br>CA                                                                                                          | NA                         | NA                          |



| Marker IDs   | Genetic positions (cM) | Chromosomes      | Physical positions (bp) | Flanking sequences/Forward primers                                                                           | ICC 12968 | ICC4958 | Flanking sequences/Reverse primers                                                                                                                                                                                                           | Annealing temperature (0C) | Amplified Product size (bp) |
|--------------|------------------------|------------------|-------------------------|--------------------------------------------------------------------------------------------------------------|-----------|---------|----------------------------------------------------------------------------------------------------------------------------------------------------------------------------------------------------------------------------------------------|----------------------------|-----------------------------|
| Ca-II-SNP143 | 161.11                 | Ca-desi-LG(Chr)1 | 7349728                 | TCTATCAGTCACAATAACTTTAGAAATTAAGTCTC<br>AGATTTGAACAACCTTTCGTACCTTTTCAAATGCC<br>AGATGAAGTTATCTTGTGTCGCTCTTGT   | A         | C       | TGATAGCACATACAAAACAAATAGATATTGGTT<br>ACCACTACTTGAAATTGTCGGTGTACACATCTAC<br>TAGTTTGTATTTTCGGTTGGGTTTGTATT<br>G                                                                                                                                | NA                         | NA                          |
| Ca-II-SNP144 | 162.01                 | Ca-desi-LG(Chr)1 | 7380996                 | TTGATTTGGGGAACATCGAGTTGATCTCACGAG<br>GTTGCTTCTCTCACTCTAGAGGAGCTTGAGGAG<br>GAGAAGAGCTCGGGGAAGTGGACTACTAGTTT   | C         | T       | GAGCATTAAGTCCATCTCTTGTGAGCTGGTGT<br>TTTCCACCAACAACCGTATACCCGAAACTGACAT<br>TCATCACAGCACCTTAGCCTTTCTGATAACC<br>T                                                                                                                               | NA                         | NA                          |
| Ca-II-SNP145 | 162.91                 | Ca-desi-LG(Chr)1 | 7383209                 | TTATACCACCAGTCCAGATCAACCTTGATTTGTTA<br>CAATCTTCACCTTTCAACCTAGAAAGGATTTTAC<br>AATCACCTTTTCCAGCCTTGAATGATTGTTA | C         | T       | CGATGAAGTTGATGGGATAATGGAATATCATT<br>AACTCTTGATGAGTGGATGAGACTAGATTCGG<br>GTGAGATTGATGATATAGATGATATCAGTGAAC<br>ATACTTTCAAACCTTCTTGCAGCCCATCATGCCA<br>ACTCTTTCGACGTTGTCGGTGAAGTTCAAAG<br>GAAGGAAGAAAAAGGCAAGGTCATGGCAGG<br>AAATGTGGTTTGTAGGAAAC | NA                         | NA                          |
| Ca-II-SNP146 | 163.81                 | Ca-desi-LG(Chr)1 | 7404716                 | AAATTTTGGTTATTTTCTCTGTTGGAGAGATATG<br>TATTTTATAGTCGCACCTTTAATTAATTTCTTAA<br>TCCCACAAGGTACATTTGGATCACCATG     | T         | C       | AAAAATGGTATTTTCGTCTATATTTTATCAATGA<br>ATACAAGTTAATATGAATTTATGCAGGTTAAA<br>AATCATGTTTTATATGAAAATAAAATCTCTC                                                                                                                                    | NA                         | NA                          |
| Ca-II-SNP147 | 165.31                 | Ca-desi-LG(Chr)1 | 7432885                 | AGATAAGTCCCTAATGCAAACCTAGAAGTTTGAAG<br>GAGCCCTTACCTCAACGTTAGCTTAAACGTGCGTT<br>TCCGGTACCGCAGTAATTCGGTAAAAATC  | C         | T       | TCTAGATCAAACCTCATTCTCGAAGAGATAG<br>AAGGGAAGTTGTTCCACCACCGCTACGGTG<br>CTAGTGAACATAATTTGGAAGCGGCTTGCAG<br>CGG                                                                                                                                  | NA                         | NA                          |
| Ca-II-SNP148 | 166.06                 | Ca-desi-LG(Chr)1 | 7481763                 | TTATACCACCAGTCCAGATCAACCTTGATTTGTTA<br>CAATCTTCACCTTTCAACCTAGAAAGGATTTTAC<br>AATCACCTTTTCCAGCCTTGAATGATTGTTA | T         | C       | TTTATCTCAAACAAGTGTGAGAAGTTAAGAT<br>CCCAAACACTTTTATCATACACATATTTAACTC<br>AAGTCTATCTTTTATGTTAGATTGAGTGTGTTT                                                                                                                                    | NA                         | NA                          |
| Ca-II-SNP149 | 166.81                 | Ca-desi-LG(Chr)1 | 7490836                 | TTGAGATCACAAGGAAGTTTATGAACAAACCTGTG<br>AGGATTCTTGTGAAGCGTGATGAGCTCACCTTGG<br>AGGGTATTAAGCAGTTTATGCAATGTTGA   | T         | G       | GCCAATCAACCTTCCGTCTGGTGTTCACAAAA<br>TAACACTCTGGGTGATTGCCAATGCTCATAAA<br>GATCACAGAGGGTGTCAAGCTTCCATTCCTCT<br>T                                                                                                                                | NA                         | NA                          |
| Ca-II-SNP150 | 167.56                 | Ca-desi-LG(Chr)1 | 7515845                 | GCGATTTGTGTTTTAAATAATATTTTTGTGGTT<br>GTCTAAGTGGCTTGTGATTTGTGTTTTGAATATT<br>TATCTATATGGTTGTCTAAGTGAATTTGGT    | C         | T       | CCAGCCACTTAGGCAACCACAAAGATAACAATA<br>TTTTAAACACAAATCACCAGCCACTTAGGCAAC<br>CACAAAGATAAAAAATGTTTAAAATACAAACCACC                                                                                                                                | NA                         | NA                          |

| Marker IDs   | Genetic positions (cM) | Chromosomes      | Physical positions (bp) | Flanking sequences/Forward primers                                                                            | ICC 12968 | ICC4958 | Flanking sequences/Reverse primers                                                                                | Annealing temperature (0C) | Amplified Product size (bp) |
|--------------|------------------------|------------------|-------------------------|---------------------------------------------------------------------------------------------------------------|-----------|---------|-------------------------------------------------------------------------------------------------------------------|----------------------------|-----------------------------|
| Ca-II-SNP151 | 169.06                 | Ca-desi-LG(Chr)1 | 7558735                 | TCGATAATGTAATCCGAGACTCATTGTCCTTTTAA<br>GGTATCTCATGACTCTTTGATAGCGTGCCAATGC<br>TCCATACTAGGTCTACTAGTAAACCTGCAC   | C         | A       | GGTGAAGGTGTTAGACAAAATGAATATGCGAG<br>CATCATTGGCAGCCTCAAGTATGCCACTGACTG<br>TACTAGACCCAACATTGCCTATGTCGTTGGATT<br>GT  | NA                         | NA                          |
| Ca-II-SNP152 | 169.81                 | Ca-desi-LG(Chr)1 | 7595734                 | ACGAGTTTTAATGTGTTTTGATGCGCGTCGCGCA<br>CTTCAAGCGTGGATTGGCAGTGGCTTCAGCACGA<br>AATGCGTTTTAGGCGCGCTTCAAGCGCACAAAT | A         | G       | AAATGAAAGCTAGGATCCATAGATACAACTTTT<br>AGGAAGACCAAGAAACCAAAATTCGGAATCCAAA<br>GAGGAGAAAAATGTACTACACTCCAGACAAAAG<br>A | NA                         | NA                          |
| Ca-II-SNP153 | 170.56                 | Ca-desi-LG(Chr)1 | 7609528                 | TGGAATATCAAAATTGTTCTTCGTAATTTTACATC<br>ATTAGATATTGAATCTTTTTTTGTTGTTGAGAATTT<br>TGGTCTATTGAATCAACAAGTATGGTA    | C         | T       | AATGAGATGTCATCATTATTACGATACACGAGA<br>GAAATAATGAATTCAGAAAATATCATATGATTTA<br>GTGTTTCTTCTGAACTTTATGCAATTTCTCTT       | NA                         | NA                          |
| Ca-II-SNP154 | 171.31                 | Ca-desi-LG(Chr)1 | 7623150                 | TTTGTGGCGGCTTTGTAGCCACAAAATGCAAAAG<br>GCTCAGGCTTTTGTGGCGGTCTTTCAGCCACAA<br>AGTGTAAACATCCCTTCAGGAATTTGTGGCGGC  | C         | A       | TGATTTTGTGAGGGCTTAGGCAGCCACAAAATC<br>CACCTAAATTTTTAAGATTTTTGTGAGGGATTTT<br>TCAACCACAAAATCTAAATTTTGTGAGGGTAAA      | NA                         | NA                          |
| Ca-II-SNP155 | 172.81                 | Ca-desi-LG(Chr)1 | 7684333                 | TTTGTGATTTTGTATTTTTTAGTATTTTATGTTTT<br>GTTTATATACTGTTTTTAGGCCCTTCGCAATAGCGG<br>TCATCCCGCTATCCCATTTTTGGGATTC   | G         | A       | GTGTTGGTGCCGACATTAGACACATCTTTAAT<br>CTAAAGTGCAATATTACATAGAAGATAAGTCT<br>ATGTTGTCAAATCTTAGATAGAAGCGCGGAGCA<br>C    | NA                         | NA                          |
| Ca-II-SNP156 | 173.56                 | Ca-desi-LG(Chr)1 | 7721091                 | TAGTTCTAACACCATTGAAGGAGTTTTATCAAGAA<br>TTATTCATGAATCTTCTTGTAATTCTCTTTTATC<br>TCTATCTTTGTATCTCTGTCATGAGTAA     | C         | T       | TGAGAAAAATAATTCAAATAATTCATTTATATAA<br>ATAGAAATCAAATCAGACAAAATAAGAGTTTCAT<br>CTTGTTTCACTCATCCCTAACAAATAGAGTTTA     | NA                         | NA                          |
| Ca-II-SNP157 | 174.31                 | Ca-desi-LG(Chr)1 | 7780059                 | ATCCCAATTATAAAATTTAATATCAAAATGGCCCAT<br>TAGCTCAGTTGGTTAGAGCGTGGTGCTAATAACG<br>CCAAGGTCGCAGGTTTCGAGACCTGCATGGG | T         | C       | ACGCGGGTGACCCGGGTTTCGATCCCCGGCAA<br>CGCGGTTTGTATTTTTTATTATTATTATTATTTAT<br>CAGAAGTTAGAATTAATAAATGAAAAACAATTTG     | NA                         | NA                          |
| Ca-II-SNP158 | 175.06                 | Ca-desi-LG(Chr)1 | 7851353                 | GCCCTGTGTTAAAGCCAATCGATTGGGAAAATC<br>GATTTCTGAGGGTTTTTCGTGAAAACGTACTCT<br>GGGCTTAATCAATCGATTGGGAAATCGATT      | A         | G       | CGATTTGGCAATCGATTGGATGCATTACAGGA<br>GCTCAGCCATTTTGACAAAATCGATTTGGAAT<br>CGATTTGGCTTTAATACAGGCGCTCAGCTATTCA<br>TT  | NA                         | NA                          |

| Marker IDs   | Genetic positions (cM) | Chromosomes      | Physical positions (bp) | Flanking sequences/Forward primers                                                                          | ICC 12968 | ICC4958 | Flanking sequences/Reverse primers                                                                                | Annealing temperature (0C) | Amplified Product size (bp) |
|--------------|------------------------|------------------|-------------------------|-------------------------------------------------------------------------------------------------------------|-----------|---------|-------------------------------------------------------------------------------------------------------------------|----------------------------|-----------------------------|
| Ca-II-SNP159 | 175.81                 | Ca-desi-LG(Chr)1 | 7904001                 | TGGATGCATGGTATGATATATGTATGCAGGGTGAT<br>AATGCTGATTTTTTATCGATAATAGTGATTTATA<br>AAATTGTGATGAGTTTATATGATGATTAC  | A         | G       | CAATATTCTCATCACAATTTTATAACGTCATTAA<br>TCATACATAATCATAATCATCGTATAAACTCATC<br>ACAATTTTATAACGTCATAATCATACATAAT       | NA                         | NA                          |
| Ca-II-SNP160 | 176.56                 | Ca-desi-LG(Chr)1 | 7944510                 | TTCAATTGCAATTATGTTGTTGTTTATATTGTCAT<br>TTTGTGTTGTTGTTGAACTAAAGTAAATCATTTTT<br>ATACTTAATTCTGGAAACAATGTCTTGC  | T         | A       | GTAAACGATCAAAGTGAACAACAAGCATCGCA<br>CAAGTTCAACCATATCAATTCAGAACTAAACAA<br>AATTCAAACAAGATAATGTTTCAATTCATACTGA       | NA                         | NA                          |
| Ca-II-SNP161 | 177.31                 | Ca-desi-LG(Chr)1 | 7981054                 | TTTTCTTGCATGAATTTAGTTTGTCTGTTTTAAAA<br>ATTAAAATTAGAAAGCAGTTTTAATTTAATTTTGT<br>GCAGGTCGAAGCTGTTTGTGATGGAGCC  | G         | T       | AGCACCAATATCAAATTTGTTTACTTGTCTATAG<br>TAGATCAATTTTGTCCACTCTCTACAAGTGGCTT<br>TATTGATTTGTAAACATATGAAGTAAAGGACATC    | NA                         | NA                          |
| Ca-II-SNP162 | 178.06                 | Ca-desi-LG(Chr)1 | 8074774                 | CAGTCCTCACACTGTGAGATTTTCCACTAAGTGT<br>TAAACAAAGAACCTTCTTGATCTTACAACACCTA<br>GTCTAGATCAACCTTGATCTGTTCAATCT   | T         | C       | AACTCAAACATAAGAGTTTCTTTATAGTTTGT<br>TAGAGTACATTGAATCCTATCAAAGTTAGATAG<br>GTACTGTTATTGCTTTCTGGGTGGAAAGTAATA        | NA                         | NA                          |
| Ca-II-SNP163 | 178.81                 | Ca-desi-LG(Chr)1 | 8092533                 | TGTTGTGTAATGTTTTGGATTTATAATTGGAGAA<br>ACTTTTCCGCTGCTTGAATTTATAATGACTCAATT<br>ATTTATCCAATGCATTTTCTGATTTAAA   | C         | T       | AAGTTAGTCAAACATGAACTTGTGAAAGGCTGT<br>AACACCCCGTTTTTCAAAGCGAGGGTATATATA<br>TATTTTTTTTTAAAGTAATTAACGAAACAAAG        | NA                         | NA                          |
| Ca-II-SNP164 | 179.78                 | Ca-desi-LG(Chr)1 | 8111129                 | TAACATTATAATGTTTTGAAAAATGAAAAATTATAT<br>TTGACATGTTGGCACATTCATCTTATTTTTAGCTTC<br>CCTATATGCGCTCACTCTCTCTGTTCA | A         | C       | TCCAGTTTTAAGAAAAGTAACATTTTCTAAAAAA<br>CTCCCCCTTAATTTTTCAAAGATATCCTTCA<br>AAATTCAAAAACAAGTAAGATAAGATGGAT           | NA                         | NA                          |
| Ca-II-SNP165 | 180.54                 | Ca-desi-LG(Chr)1 | 8169336                 | GCACTGGCCCCATCTTCTTCCAAATGCACTGGT<br>ATCGAATAGGTCTCAGCACACTTTCAATAGTTTTG<br>GTAGTCCCTTTGCCAACCATCGTCAAGGTT  | A         | G       | CATCCAAATGAAACTGCAACAGTATTGGACTAG<br>ATGATGTCCCTTCACTTGAAACAATCAACTTAAG<br>TGGGACATGTCATCTGTGACTTGCACCAACGA<br>CT | NA                         | NA                          |
| Ca-II-SNP166 | 181.30                 | Ca-desi-LG(Chr)1 | 8196164                 | ACCATTTGAACACACGAGCAACTTCACTATCAGAT<br>CTACTATTGCTTCTCTCTGCATTTGAATGCTTT<br>GCTCGATGACTCCAGTTTGTGGGTAATA    | C         | G       | AGATTCACAACCATAGTCAACAAAATACCTTCT<br>CTTGAGAGATGTCGGAATGAGTTGGTATTTCAA<br>AATAAGATTGATAATAGTCACACAATGGCTGCC<br>A  | NA                         | NA                          |

| Marker IDs   | Genetic positions (cM) | Chromosomes               | Physical positions (bp) | Flanking sequences/Forward primers                                                                           | ICC 12968 | ICC4958 | Flanking sequences/Reverse primers                                                                                                                                                                                                                                                                                                                                                                               | Annealing temperature (0C) | Amplified Product size (bp) |
|--------------|------------------------|---------------------------|-------------------------|--------------------------------------------------------------------------------------------------------------|-----------|---------|------------------------------------------------------------------------------------------------------------------------------------------------------------------------------------------------------------------------------------------------------------------------------------------------------------------------------------------------------------------------------------------------------------------|----------------------------|-----------------------------|
| Ca-II-SSR54  | 182.06                 | Ca- <i>desi</i> -LG(Chr)1 | 8205909                 | CTTTTAAAGCAATGTTTACCTTTTC                                                                                    | (AT)14    | (AT)11  | GCGACCTAGTTCCTCGAAACATC                                                                                                                                                                                                                                                                                                                                                                                          | 57.06                      | 136.00                      |
| Ca-II-SNP167 | 182.82                 | Ca- <i>desi</i> -LG(Chr)1 | 8210526                 | TTCATACTCGAAAGAGAAGAAACATGCAATATGCA<br>CCGGACATCAGATAATGAGCGCTTGAGCGCGTC<br>TGAAGCGCTTTTCCAGCATCTGCTACTGCC   | T         | C       | ATAGTAAAAAGATCCCTAAAACAGTAAAAATC<br>TGTGTTTTTATGGTTGCTGGTGCGGGTCGCGC<br>TCCACAGGCGGAAAAACGCGCTCCAGACGC<br>GTTT                                                                                                                                                                                                                                                                                                   | NA                         | NA                          |
| Ca-II-SNP168 | 183.58                 | Ca- <i>desi</i> -LG(Chr)1 | 8232371                 | TAATTTAGTGAATTTTTTTGTTGCAGGAATTAATTT<br>ATTCATTTAATTATTGTTAGGGACTTAATTGTCTAT<br>TTTTAATTATTATCAAGGACCTAATTGT | C         | T       | TTTATGTGAACCACAGTTAAAAAATTGAGATTTT<br>TTTTACTAATTTGTCTGATGACTCGTCAACTTGA<br>TTTTCCACGTGTAATTTCTATATAAAAAAAG                                                                                                                                                                                                                                                                                                      | NA                         | NA                          |
| Ca-II-SNP169 | 185.10                 | Ca- <i>desi</i> -LG(Chr)1 | 8345900                 | AGTTTTGACATAGAGAATGGACCCAAGGCTGCTG<br>AGTATATTCAGGTTTGTTTTTATTATTTCCACTACG<br>GGAAATGCTGATTGTTACTAGAGATGTTTG | C         | T       | GGGTTTGGACTTATAAGCAATCGGCTGACCATA<br>CATGCGAGAGTGGGTAGTTATTATTTATAAGTG<br>TTAGATGTTGCCACATATTATTCTTCTTTTCTT                                                                                                                                                                                                                                                                                                      | NA                         | NA                          |
| Ca-II-SNP170 | 185.86                 | Ca- <i>desi</i> -LG(Chr)1 | 8383527                 | TCGCCACACAATAAGCGAAATCTTACCATCGGA<br>TTTGATGTACTCATAGTTGATATCAATGCCATCTAT<br>TATGTTAAAGCTCCAAGGATCCTTGACTT   | T         | A       | CGCACTATTTTGTATTATAAGCAACATTTTGG<br>GTGGGAATTGCAATGCTGCTGCTTGGCATCAA<br>TATACACAAAATGATCCATTCTACAATGTCCC<br>AATAAAGCATTACCTTACATGGCTTTTTATGGAA<br>ACAAAAACAAGTCACCTTATATAGATAGAGCAT<br>CTAGTAATTACACAAAAGCCATTTTATTAATGT<br>ATATACCCTATGACTTATCCATTTCTCTTCATT<br>CCATCATCATTCCCTCATTTCTGCTATAATT<br>CCTGACATTTGTGTATTTGTTAAAGAGTATTC<br>AAATCAGATAAAATTCACCTCACAAACAAAGGCC<br>ACCCTTGGTTCACATAAGTAACATTGGTACCTCT | NA                         | NA                          |
| Ca-II-SNP171 | 186.62                 | Ca- <i>desi</i> -LG(Chr)1 | 8453603                 | AAATCAAGTATGTGAACCAAGGGTGGCCTTTGTTT<br>GTGAGTGAATTTGGGGGTGACTTAAGAGGTACCA<br>ATGTCAATGGCAGTGAATTTGGGGGTGACTT | G         | A       | CGGTTGGTGTGATGATAAACATCCATTCCATCC<br>TGCTTCAAAGTAGATTGGGCTGACAATGCTGT<br>AAACTCACTCAAAGATCATCCAACAATACAA<br>C                                                                                                                                                                                                                                                                                                    | NA                         | NA                          |
| Ca-II-SNP172 | 187.38                 | Ca- <i>desi</i> -LG(Chr)1 | 8477054                 | TCGCCACACAATAAGCGAAATCTTACCATCGGA<br>TTTGATGTACTCATAGTTGATATCAATGCCATCTAT<br>TATGTTAAAGCTCCAAGGATCCTTGACTT   | T         | C       | CGGTTGGTGTGATGATAAACATCCATTCCATCC<br>TGCTTCAAAGTAGATTGGGCTGACAATGCTGT<br>AAACTCACTCAAAGATCATCCAACAATACAA<br>C                                                                                                                                                                                                                                                                                                    | NA                         | NA                          |
| Ca-II-SNP173 | 188.90                 | Ca- <i>desi</i> -LG(Chr)1 | 8501184                 | GGCATCGGGAGTCTGTTTTAAATATATATAAAGAC<br>TTATTTACGCTTTAAACCCCTCATTAACTATTCTT<br>GTGTGTGACACTATACGTTTCCGAAAT    | A         | G       | CGAATCACATGACATTCTCGTCACTTGATTAGT<br>AGTGATGCATTGCTAGATAATGTTGTTTTTTAT<br>AATATTAATAGATGATATAATATTATTATCAA                                                                                                                                                                                                                                                                                                       | NA                         | NA                          |

| Marker IDs   | Genetic positions (cM) | Chromosomes      | Physical positions (bp) | Flanking sequences/Forward primers                                                                           | ICC 12968 | ICC4958 | Flanking sequences/Reverse primers                                                                                                                                   | Annealing temperature (0C) | Amplified Product size (bp) |
|--------------|------------------------|------------------|-------------------------|--------------------------------------------------------------------------------------------------------------|-----------|---------|----------------------------------------------------------------------------------------------------------------------------------------------------------------------|----------------------------|-----------------------------|
| Ca-II-SNP174 | 189.66                 | Ca-desi-LG(Chr)1 | 8543377                 | AATGAAGTATATGCTCCAGTAGCTCGATGGGACA<br>CAATTCGGATCTTGTGGCTGTGGCAACTCAAAA<br>GGGATGGAATGTGTATCAGCTTGTATGTAAAA  | T         | G       | TTTGTGCAGCCTATATACCTTGTCTTCTCTCC<br>CTGCTTTATGAAGCCCTCAGGTTGATCTACATA<br>CACTTCTTCTCAGTTCTCCATATAAGAAGGC<br>A                                                        | NA                         | NA                          |
| Ca-II-SNP175 | 191.18                 | Ca-desi-LG(Chr)1 | 8653369                 | TATAATTTTCGTCGCTCGATGCGACGTTTTTTTGT<br>TTTAATATGGCATTTTATTTTTCTGTCTGTGGTG<br>CGGAGTGTTCCGTTTTGATTCAGCTATGCA  | A         | G       | TATGATAAAATTTAAATTCATAATATATATGTT<br>TTCAGATTTATAACGTTAACGACGTCAAAGTTAT<br>TGATTGAAATCTATAATAGATTAAAACACT                                                            | NA                         | NA                          |
| Ca-II-SNP176 | 191.94                 | Ca-desi-LG(Chr)1 | 8896611                 | ATGACTTCTCAATTGATGACCATATTAATTTTTAAT<br>TTTTTTTTTTTTGCATATTATAGACTTGGGATGG<br>CCCAATCGGTCATGTCAAACAACAAACT   | A         | T       | TTGACTACACTTTTATGCTTCTTTATGAATTG<br>TACTACACTTATATCATTACAATTGAAGCGCAT<br>GTAAATTATAAACCATAAAGTTTACAAATGATGAT                                                         | NA                         | NA                          |
| Ca-II-SNP177 | 192.70                 | Ca-desi-LG(Chr)1 | 8987902                 | CTTTTCTATCTGTTTCCCATTAACACAACCTTTTCT<br>TTTTTTCAACAATGGCTCCAAGAGACAGACCCACC<br>GCAC TACCCGGGCCAGCCATCAGCCCA  | C         | A       | AAGTACCAAGCCAAACTCGTGTTTTTTGGCCGG<br>GGTCACGGATCTCAGCGGCGTAACGACCCAC<br>GGACGTTTTCTAACGCCTCTAAAACGAATCTCT<br>TT                                                      | NA                         | NA                          |
| Ca-II-SNP178 | 193.46                 | Ca-desi-LG(Chr)1 | 8988178                 | ATTTTCCAACACCGTCGGAGATGCTTAATCTTAAC<br>ATTAGTAACAACAGCACAGCAGCCCAAGTCAGA<br>GTAGCACCCTTGAATCACCGTCACCGCCGCC  | G         | A       | GTCAAACGCGTCGAAAAATAAACAGGACGG<br>GATACCGGAAAAGCCAAAGAAACAGCACCGAC<br>GCCGGTGCGGAAAAATGGTGTGAGATTAGAT<br>CAAG                                                        | NA                         | NA                          |
| Ca-II-SNP179 | 194.22                 | Ca-desi-LG(Chr)1 | 9116083                 | TCAGAAATGAGTGAATGAGTACTCTTTGGAAAGCT<br>TATGGTGTCTACTTTATAGATAAAATTTATTTTAT<br>TTTTATTTAATCCAATCTTGCAATTTA    | C         | T       | AGTCGTGATGATTGATCGAGTATTGATGTTGAA<br>AAATGGGTTACAAGCTGGACCAGAGTTGCTGT<br>TACTGTTTTGTTTTATGTCATTTGTGTTTATGTT<br>A                                                     | NA                         | NA                          |
| Ca-II-SNP180 | 194.98                 | Ca-desi-LG(Chr)1 | 9161984                 | ACCGGAGAGAAAGTCTCTTTATAATCAATCCCTTC<br>CTTTTGAGTATAACCCTTAGCTACAAGACGTGCCT<br>TATATCTCTCCACATTACCATTGGAATCCC | T         | G       | TGAGGAGTACAAGTCTATGCAAGACAATTCAGT<br>TTGGAACTTATCCCATTACCCGAAGGAGTGAA<br>ACCCATTGGTTGCAAATGGATTTTTAAAACCAA<br>G                                                      | NA                         | NA                          |
| Ca-II-SNP181 | 195.74                 | Ca-desi-LG(Chr)1 | 9182446                 | TGTTGTGTAATGTTTTGGATTTATAATTGGAGAA<br>ACTTTTCCGCTGCTTGAATTTATAATGACTCAATT<br>ATTTATCCAATGCATTTTCTGATTTAAA    | A         | C       | TGCCATTACAGTGTCTACTTCTATCAATCAATC<br>AATGCTATTCTACATAAAAGTTTACAACAGGAT<br>GTTAACAAGCAAAGAAAACAAAAACAAACTGTG<br>TAACCTGCTAACTTAATTATGCTCCTCTATAATC<br>CCAATATCCGGCCAG | NA                         | NA                          |

| Marker IDs   | Genetic positions (cM) | Chromosomes               | Physical positions (bp) | Flanking sequences/Forward primers                                                                         | ICC 12968 | ICC4958 | Flanking sequences/Reverse primers                                                                                                                                                                                                                                                                                                                                                                                                                                                                                                       | Annealing temperature (0C) | Amplified Product size (bp) |
|--------------|------------------------|---------------------------|-------------------------|------------------------------------------------------------------------------------------------------------|-----------|---------|------------------------------------------------------------------------------------------------------------------------------------------------------------------------------------------------------------------------------------------------------------------------------------------------------------------------------------------------------------------------------------------------------------------------------------------------------------------------------------------------------------------------------------------|----------------------------|-----------------------------|
| Ca-II-SSR55  | 196.50                 | Ca- <i>desi</i> -LG(Chr)1 | 9870501                 | GGACCAAAACGGCAATTA                                                                                         | (TAT)15   | (TAT)19 | TAGGCATGTCTGGCATTTTG                                                                                                                                                                                                                                                                                                                                                                                                                                                                                                                     | 59.81                      | 144.00                      |
| Ca-II-SNP182 | 197.26                 | Ca- <i>desi</i> -LG(Chr)1 | 9983100                 | TAACATTATAATGTTTTGTAAATGAAAAATTATAT<br>TTGACATGTTGGCACATTCATTTATTTAGCTTC<br>CCTATATGCGCTCACTCTCTTGTTC      | T         | A       | CAGATGTCCAATTGAGAGTTGCCCTGTTGACTG<br>TATTCATTGGACATCTGCTGCACAATCATCATT<br>ACTCGAAGATGAAATGCACCGTATAGAAAGAGT<br>CAACGTTGCTCTAATGCTTTGAGGAATGGGATC<br>AGCTTCATTTGATGTTTTGAGAAATGGCGAGTTC<br>GCGATGGGAAAAGAGACAGTCAAAAGTCTTGA<br>GGATGAAGTTAAAGAAAGAGCAAAAGAGCTG<br>CTGCGCGCCGACACCATCAACCAATCACTCA                                                                                                                                                                                                                                         | NA                         | NA                          |
| Ca-II-SNP183 | 198.78                 | Ca- <i>desi</i> -LG(Chr)1 | 9986169                 | GCACTGGCCCCATCTTCTCCCAATGCACTGGT<br>ATCGAATAGGTCTCAGCACACTTCAATAGTTTTG<br>GTAGTCCCTTTGCCAACCATCGTCAAGGTT   | A         | C       | GAAAAAGGTGAGTCATCACTCAAAAACGAA<br>GCTCAGAAAAGGAAAAAGTACCTCTAGGAGTTT<br>GTGCGAGCTCGAGTTTAAAGAGCTAAAAGGTT<br>TTATGGATTTAGGATTTGTTTTGCTGAGGAAG<br>ACAAGGATTCAAGATTGTTTTCTTGATACCAG<br>G                                                                                                                                                                                                                                                                                                                                                     | NA                         | NA                          |
| Ca-II-SNP184 | 201.06                 | Ca- <i>desi</i> -LG(Chr)1 | 10562402                | TCTATCAGTCACAATAACTTTAGAAATTAAGTCTC<br>AGATTTGAACAACCTTTCGTACCTTTCAAATGCC<br>AGATGAAGTTATCTTGTCGCTCTTGT    | G         | C       | GGCGGTTGGGGTGCATTAGAAGAAGAGGA<br>AGAAGAAGAAGGTTGGGAAGATTGTAACCTGA<br>AAACGACGTCATCTCGTTAGTTGAGGGGC<br>GTGGAATTAACGAGAGGCGACGCGCGTGGG<br>GTTGGATGCCGAGGTAACGCTCCGCT                                                                                                                                                                                                                                                                                                                                                                       | NA                         | NA                          |
| Ca-II-SNP185 | 201.82                 | Ca- <i>desi</i> -LG(Chr)1 | 10739203                | TTGATTTGGGAAACATCGAGTTGATCTCACGAG<br>GTTGCTTCTCTCACTCTAGAGGAGCTGAGGAG<br>GAGAAGAGCTCGGGAAAGTGGACTACTAGTTT  | C         | T       | TCTCAATACAAATAGTCTCTCCATTATTTT<br>TTTGAATAGATACAACCAACCCCTCATATACA<br>TAAAGAAAACATACATATATATGTCTTTAAT<br>AATCACCATAAACCACCAACCTTACTTTCAT<br>GTGGCCTTGCCTAAGATAGTGAAGGAACCTACC<br>ATCCCTTTAATGAAATCGTACCTACGAAACAA<br>ATGTGCCACAATCAATGATGCGGTGAAGGTTAC<br>ATCTCTCTCCGCGACATTCATTATACAGAG<br>GTACAAGATGCACAGATTGATGAAGATCTCAA<br>GATCTTAAAAACTCAAATAGGCAGATCTTGCTG<br>GAGATAATAGCCAGCTGCTATGGGTGTGATTT<br>CCACATTTTGTGTTGCTCTTCTCATTCTTCT<br>TCATTATTTCTTCAATTTGATTTTTCAGTCTAA<br>ATGAGTGAGCAAAAGCTTCTAGTCTTTT                            | NA                         | NA                          |
| Ca-II-SNP186 | 202.58                 | Ca- <i>desi</i> -LG(Chr)1 | 10785548                | TTATACCACCAGTCCAGATCAACCTTGATTTGTTA<br>CAATCTTCACTTTCAACCTAGAAAGGATTTTAC<br>AATCACCTTTGAGCTTGAATGATTTGTTA  | A         | G       | GTACAAGATGCACAGATTGATGAAGATCTCAA<br>GATCTTAAAAACTCAAATAGGCAGATCTTGCTG<br>GAGATAATAGCCAGCTGCTATGGGTGTGATTT<br>CCACATTTTGTGTTGCTCTTCTCATTCTTCT<br>TCATTATTTCTTCAATTTGATTTTTCAGTCTAA<br>ATGAGTGAGCAAAAGCTTCTAGTCTTTT                                                                                                                                                                                                                                                                                                                        | NA                         | NA                          |
| Ca-II-SNP187 | 203.34                 | Ca- <i>desi</i> -LG(Chr)1 | 11291737                | AAATTTTGGTTATTTTCTCTGTGGAGAGATATG<br>TATTTTATAGTCGCACCCTTTAATTAATTTCTTAA<br>TCCACAAGGTACATTTGGATCACCATG    | C         | T       | TTTGCACCCCAACAAATGATTGGTATTTCA<br>AATACAGAATATCAAATACAGAATATCAAATCA<br>GGAAGGATTACAAAGAATAAATAAATAAAGG<br>TTGCCAATTGCCATTACAGCACCAATCAGAA<br>AACACCTACTAGCCTCGTGGGAAAAAATAACA<br>TCCTGCTACTTGTGATTTATCTCATTCAACACA<br>AGCTCATCAATGCGTTGATTTGCGTGCTTTTT<br>CAGAAATAAGCAACGCAAAATCACTTTCAGCT<br>CAGCAACTTTGCAAGCAATCATTTGTTTTGTTG<br>AAAATGGGGTGACCGTGTCAAATGGTGAGG<br>GCTGGAAGCATCAGGTGTTTTTCTCGTGAAA<br>GGACCAATTTACTTAGTCTGCATCAGCTGCACC<br>GAAGAGCCTTATGAGTCTTACGGAGGCAATTA<br>GATCTCATTATGGCCAGATGATTGTCATACTG<br>ACAAAATCAGTAACAGATG | NA                         | NA                          |
| Ca-II-SNP188 | 204.10                 | Ca- <i>desi</i> -LG(Chr)1 | 11899768                | AGATAAGTCCCTAATGCAACTAGAAGTTGGAAG<br>GAGCCCTTACCTCAACGTTAGCTTTAACGTGCGTT<br>TCCGGTACCAGGATTAATCCGGTAAAAATC | T         | C       | CAGCAACTTTGCAAGCAATCATTTGTTTTGTTG<br>AAAATGGGGTGACCGTGTCAAATGGTGAGG<br>GCTGGAAGCATCAGGTGTTTTTCTCGTGAAA<br>GGACCAATTTACTTAGTCTGCATCAGCTGCACC<br>GAAGAGCCTTATGAGTCTTACGGAGGCAATTA<br>GATCTCATTATGGCCAGATGATTGTCATACTG<br>ACAAAATCAGTAACAGATG                                                                                                                                                                                                                                                                                               | NA                         | NA                          |

| Marker IDs   | Genetic positions (cM) | Chromosomes               | Physical positions (bp) | Flanking sequences/Forward primers                                                                          | ICC 12968 | ICC4958 | Flanking sequences/Reverse primers                                                                                                                                                                                                                                                                   | Annealing temperature (0C) | Amplified Product size (bp) |
|--------------|------------------------|---------------------------|-------------------------|-------------------------------------------------------------------------------------------------------------|-----------|---------|------------------------------------------------------------------------------------------------------------------------------------------------------------------------------------------------------------------------------------------------------------------------------------------------------|----------------------------|-----------------------------|
| Ca-II-SSR56  | 204.86                 | Ca- <i>desi</i> -LG(Chr)1 | 12228747                | CGTCCAATCCTACCAAGTATTC                                                                                      | (AT)6     | (AT)7   | TGAAGACAAGAAAATGGCCC                                                                                                                                                                                                                                                                                 | 58.94                      | 169.00                      |
| Ca-II-SSR57  | 206.38                 | Ca- <i>desi</i> -LG(Chr)1 | 13530166                | TCATCTTCTATGGCTACTACTTCAA                                                                                   | (TAT)5    | (TAT)6  | TTCAAACATTCTCTTTACTAAGTGCA                                                                                                                                                                                                                                                                           | 57.88                      | 210.00                      |
| Ca-II-SNP189 | 207.14                 | Ca- <i>desi</i> -LG(Chr)1 | 13591156                | TTATACCACCAGTCCAGATCAACCTTGATTTGTTA<br>CAATCTTCACCTTTCAACCTAGAAAAGGATTTTAC<br>AATCACCTTTCAGCCTTGAATGATTGTTA | G         | C       | CCATTTTCAATGATTCATTTATAGGTGAACTTT<br>TTAAATTAAGTTGAAGCTCAACCATTTGAATAAC<br>CATGATCTGATTCTCGATCCTACGCATTTCGTIA<br>AGGTTTTGAGATGGCATGGTTAATGCGAAAAA<br>TGCATGGGGAACTTCCCTGATTTGGCGGGAG<br>CCGTGAATAAGCTTCAGGAGAGTGTGAAGAGT<br>ATTGAGAAGAATTTTGATACTGCTCTTGATTT<br>CAAGAAAACCCCAATCTACTAATCAAGCTTCA     | NA                         | NA                          |
| Ca-II-SNP190 | 208.66                 | Ca- <i>desi</i> -LG(Chr)1 | 13721651                | TAACATTATAATGTTTTGTAATAAATAATATAT<br>TTGACATGTTGGCACATTCATCTTTTTAGCTTC<br>CCTATATGCGCTCACTCTCTCTTGTTC       | A         | G       | TTAGGAAATTTCTAATGAGCAATCATCATCA<br>GCTCTTCAAAGTTCTCAAGGTGATATAGATCTG<br>CAATGTAAGATAATGTGACCTCTCAAAGTAGA<br>AATCTTGAGATTGTTGGACAAAAAGACAATCTT<br>CCTGCTGATCAACTCCTACTGCTGATGGAACC<br>CAAGGATTAGCATTCTTGTCTCAGGTCAGAGAA<br>AAACTCAGTCTGCAGAATATATAGACTTTGTG<br>CCTTATATCAAAACCCCTCAACACCAAAACATTC     | NA                         | NA                          |
| Ca-II-SNP191 | 209.42                 | Ca- <i>desi</i> -LG(Chr)1 | 14029689                | GCACTGGCCCCATCTTCTCCCAAATGCACTGGT<br>ATCGAATAGGTCTCAGCACACTTCAATAGTTTTG<br>GTAGTCCCTTTGCCAACCATCGTCAAGGTT   | C         | G       | TGATAATTCAGTCTCCTAAGAAGATCTCGAACG<br>ATAAAGGAAAAACGTGCTCGTCTTCGTGTA<br>GAGATGCAAAAAGTTGAGGAGGGGCAAGTGAT<br>CTGTTACATTGAACAGCTTGGTGGGAGCTGC<br>CAATTGAGTGTGATGTGTCCGGGGAGGTTATC<br>AAGATTCTAAGAAAGGACGGGGATCCGGTTGG<br>TTATGGTGACGCACTTGTAGCAGTATTGCCGTC<br>ATTCGCTCAATAAAGACCTTCAATAGATCTTT          | NA                         | NA                          |
| Ca-II-SNP192 | 210.80                 | Ca- <i>desi</i> -LG(Chr)1 | 14135090                | ACCATTTGAACACAGCAACTTCACTATCAGAT<br>CTACTATTGCTCTTCTCTCTGCATTTGAATGCTTT<br>GCTCGATGACTCCAGTTTGTGGGTAATA     | G         | A       | GCCGGACCCAAAAGTTTTAGAGCTTTGATAAA<br>GAATTTTCAATCTATAAATTTGAAGGTTTTTCAA<br>ATATCAATCTTAAAGAACCAATTTCTACTAAAGC<br>TTATATTATAAGCATATTAATAGCTTCAAATGG<br>TAATGATATTTATTCACAGCCTATCGGGAGAAG<br>AAAGAGGAGGACACACGAGCATCCTTCCAACA<br>CCCATAAATTCAGCAGCAAATTTCTCGTCATTTT<br>TTCCAGCATATCTCTTCAACTCATTCAATATT | NA                         | NA                          |
| Ca-II-SNP193 | 1.08                   | Ca- <i>desi</i> -LG(Chr)2 | 75212                   | TTTGTGTATAAATGGTATTTTACTGAGATAATT<br>TGTATAGTGCTTTGGCTGAGATGATTTGACTGTG<br>TTTTGCAAAGATAATTTTGTATTTTTC      | C         | T       | GCAACATGTTGACTGACACAAGCAAAAACAGT<br>GTTTCACCTCAGTAGAAGGTAACAGCATGGCA<br>TGACATAAAGTAAAACGTTTAAATCAATATGGT                                                                                                                                                                                            | NA                         | NA                          |
| Ca-II-SNP194 | 2.09                   | Ca- <i>desi</i> -LG(Chr)2 | 89296                   | AAACCAGCTCTCGCTTCTGCATAAGCCTTTCCA<br>TAAGCAGTGATGTGGTCGGTGAGATGCAACAGG<br>TGAATTACCCTTTGTGCGGCCGAAAGAGCG    | A         | G       | AAAAAACTCTTCAGCCACTGGTTTTAGGTAAAT<br>TGTTATTGATTATGGCTACTTATGAAGATTTT<br>TTCGGTGGGAAGAGTATTTTCAGAAGTCAAGTT                                                                                                                                                                                           | NA                         | NA                          |

| Marker IDs   | Genetic positions (cM) | Chromosomes      | Physical positions (bp) | Flanking sequences/Forward primers                                                                             | ICC 12968 | ICC4958 | Flanking sequences/Reverse primers                                                                                | Annealing temperature (0C) | Amplified Product size (bp) |
|--------------|------------------------|------------------|-------------------------|----------------------------------------------------------------------------------------------------------------|-----------|---------|-------------------------------------------------------------------------------------------------------------------|----------------------------|-----------------------------|
| Ca-II-SNP195 | 3.10                   | Ca-desi-LG(Chr)2 | 123972                  | AGGAACATTAACACTTTACCCAGAATGTCCTTGC<br>AACTAGCTTTGTTGCCCTCTTGATTTCCGAACTT<br>GGTTCGATATTCTCCTAAAATACATGTAGG     | G         | A       | ACTTTAATATTTTTAATATTATATTTATCACTT<br>TAATATTACACTTTAATATTTTTAATATTGTATT<br>TTAATAATGATATTGAACTTATCTTTTTAA         | NA                         | NA                          |
| Ca-II-SNP196 | 4.11                   | Ca-desi-LG(Chr)2 | 208901                  | GTATCGTACTTACGTTTACTAGACTTAATATTGCTT<br>ATGTTGTTTCATATTGTCGGTCAAAAATAATATTGAT<br>TTCAAGTACAAAAGATTCTACTTGTTTT  | G         | C       | ATATCATAATATCCTACAATGTTGTTTGTGGTCT<br>TGGAACTGCGCACTTAATAAACATTAGTGTCT<br>AAAATTGTTTCCACAAAAGTATTTTATTATCAT       | NA                         | NA                          |
| Ca-II-SNP197 | 6.13                   | Ca-desi-LG(Chr)2 | 232256                  | ACATGTCGTCCAAAGTAATCGTCATTTCCACCAATA<br>GGGAGATGAAAGCTACTGGTGTCCAGATGCCACC<br>TCTCTACGAATGCAGAAATGATCCCTTTGTCT | A         | G       | GGAAAAATTAAGAAGCTGTTATTGAAGACG<br>AAGAGGTTGAGCAACTAGTTAAAAGCTCGGGA<br>TTGTATTCTGTTACTAAAATGCAGCTATGAAATG<br>AT    | NA                         | NA                          |
| Ca-II-SNP198 | 7.14                   | Ca-desi-LG(Chr)2 | 249953                  | GTAGGGATTTTTAGAGTTTTGTTGTTACTTTG<br>TTTTAGTGAAGTGCCTGAAATTTGGTGAGAAATCAA<br>CATGACATATGTAGAGTATTTCCGCCATAT     | C         | G       | GAGTCTGAATTTGGTTCTGGTGTCTTCATGAAA<br>AATGTAGCTATGGATCTTGGCTTTCAATTTCCAC<br>TTGGTTTGACTCCAATTGGACATCTATAACTCC<br>A | NA                         | NA                          |
| Ca-II-SNP199 | 8.15                   | Ca-desi-LG(Chr)2 | 315499                  | AAATTTTATTGAGTCTTGGTATTTAGTTACTTCAA<br>GTCTTAGAGGCTTAACTTGTATTTCCCTTGACTT<br>TTGTTGGTATTTACATCTATCTGAAGAC      | G         | T       | TTCCCCCTTGATAGCTAGCTTTTAAAGGAGGGT<br>TCCCAAGTCTTAAATACTTATCACAAAGTTCA<br>TGAAATATTCATAATTAGCATTAAGCCACA           | NA                         | NA                          |
| Ca-II-SNP200 | 9.16                   | Ca-desi-LG(Chr)2 | 325842                  | AAGTCCAAGGGTACCTCATGAGTGGCTTACAATC<br>ATCCATCAATAGCCGAGTGAGGACATTACACTCTA<br>AGCTCTCGGCTTTAGTTCATACAGCTAGTC    | A         | G       | CTCACTTCGAACAATTTGTTCCCTTCCCTTTTCAT<br>TTCCAAAAACGACTATGTATTGTCTCACCTCCT<br>ACTTCTTATCATTATCTCCTCTTTATATCTC       | NA                         | NA                          |
| Ca-II-SNP201 | 10.17                  | Ca-desi-LG(Chr)2 | 354586                  | CCTAATGAAGCTGGTGCATGGACCTATGTTATG<br>GACTTAAATCCTTAATTATATGTATGAAAACAATTG<br>AACTATTCTGGCTTTGACCTATTGGTTATG    | G         | T       | TCGACCCAACCTTTAAATACGTCAAACCTAAATTG<br>GATTAACCTACATTTTTTAGATGCAAATTTATT<br>TAGTTTAAAAAAAATGCGTAAAAGAGTGACTC      | NA                         | NA                          |
| Ca-II-SNP202 | 14.21                  | Ca-desi-LG(Chr)2 | 371023                  | GACATGATTAATGATGTTCCCGAAGTATATCCCT<br>AGCATCTAAGAAATGAGCAGTGAAAAAGATGCTCT<br>GTGTAGTTGTGTTGAACTGCATGCATT       | C         | G       | AACTATATAAATGTTAATCCATTTTAAAAATTA<br>AGCAGCAACTAGTAGCCTATAGTAGTGAAGTAC<br>ATTACTACTGTAATATTATTTAATAGTGATAAT       | NA                         | NA                          |



| Marker IDs   | Genetic positions (cM) | Chromosomes      | Physical positions (bp) | Flanking sequences/Forward primers                                                                            | ICC 12968 | ICC4958 | Flanking sequences/Reverse primers                                                                               | Annealing temperature (0C) | Amplified Product size (bp) |
|--------------|------------------------|------------------|-------------------------|---------------------------------------------------------------------------------------------------------------|-----------|---------|------------------------------------------------------------------------------------------------------------------|----------------------------|-----------------------------|
| Ca-II-SNP203 | 15.22                  | Ca-desi-LG(Chr)2 | 392964                  | GCCTTACTGTTTGTATACCAATTGACATGATGGGT<br>AATGTGACATTATGTAGCTCACTGTCATTTTAGGT<br>ACACTATTTGGGCTGGCACTCAGAACAAAA  | A         | C       | TGTCTGGAGGACCCATAATTGTCGCTTGCCAAT<br>GAAACATATCTTCAGCAACAGGACCTGTAAAGT<br>TTTGAACAAAGACAAAACAAGATATCAGCACA<br>A  | NA                         | NA                          |
| Ca-II-SNP204 | 16.23                  | Ca-desi-LG(Chr)2 | 413593                  | GTGTGTGAATATATTAATCAAGTTTATGTGAAATG<br>GTGAAGGGTTGAGTCACCTCTTGACGGCGGTGAT<br>TGCGGTCGTTACCACCTTGGTGGGTCGTGTGA | G         | A       | CCGACTCACTAACAATCTAACTAACCATGCTCC<br>TATAAAGTTTAATTAACATATTTATATATTTTG<br>GAAGAAGAAAAATTGAGACCTCGATTATCGAA       | NA                         | NA                          |
| Ca-II-SNP205 | 17.24                  | Ca-desi-LG(Chr)2 | 420492                  | TTATTTAGTTTATTAGTAGTTAATGTAAGACTTTAA<br>CCACTCACATTTGAACTTAACAATCTCTCCCTCAA<br>GTGTGAGTCTTTCGCATCATATTTTGTGA  | C         | T       | GGTCTTATTGTCGTAACGTTTCCGTTTGTGGA<br>GGAGCGGAAATGGATCATGATATTGGATCCTT<br>GTATCAAATACTTCTTGTGAGTGTGTAACAA<br>CG    | NA                         | NA                          |
| Ca-II-SNP206 | 18.22                  | Ca-desi-LG(Chr)2 | 429417                  | CATTACCTTTTGGTTGCCATAAACTTCAGGTGAA<br>GCAAGGCAGCTGGCTTCATGTACATCTCCAACAA<br>AAGCAAGAGCTTCTTCAATGACTTTATATTT   | C         | T       | CCATTGAGACTCAGCAGCGCTTGAGAGAGAT<br>GCTGCAATTGCACGTTTGGAACAGAGTAGAATT<br>GTTCTTGAATGAGACTGGCAGAACCCTGG<br>AAA     | NA                         | NA                          |
| Ca-II-SNP207 | 19.20                  | Ca-desi-LG(Chr)2 | 436660                  | AGTTAATCGGAATAATGCATACCCTCGACCATC<br>CGGCCATATGATTGTTCTCCCGTCAGGTGCAACA<br>CCATGACTAGAATTGGAGCATCATGAGCCTT    | G         | T       | ACTGCTACAAAAAACTTTTATGATTTGTTAAC<br>TGCTACAAAAAACCTTATATGAGGGGGCTTC<br>TGATTCAAGGTTATCGTACTGGTAATAAGACT          | NA                         | NA                          |
| Ca-II-SNP208 | 20.18                  | Ca-desi-LG(Chr)2 | 441416                  | TTGAGCTGAATCTAGTGCTTCTAGGACTTCTAAT<br>GCCATTTTGAAAAATTAAGACTCTCAATTTGATTT<br>ATGGAATTGGTTAGTTATTTATGTGTTT     | G         | C       | AGCTAGCAAATCCCAATTTTCTTGTTCACATCT<br>CCTAAGATAACTTAGGATTAACGTCATTACA<br>ACATCAACATAGTTATAATAAGATATATAAGAG        | NA                         | NA                          |
| Ca-II-SNP209 | 21.16                  | Ca-desi-LG(Chr)2 | 451398                  | CTTAATGTTCCACCTTTAGTCCAATATCTTCTACAA<br>GATTTGCAGAAATATCTTGGTTGAGAAAGACTGTA<br>ATTGTTGTAGTAACAGAATTTGGTGTGG   | A         | T       | CGAATCATTGGAGAATATGTTGGCTTGTTCGAA<br>AGCACAAACAAGACAAAAACCAAAACCTCAGCC<br>AGAACAAGCTCTAAAATGTCCAAGATGCGACTC<br>A | NA                         | NA                          |
| Ca-II-SNP210 | 22.14                  | Ca-desi-LG(Chr)2 | 493799                  | ACACAAGAGTTGATACACTCCTACAATGGTATAAA<br>CCACTTAATTTGTGCTCTCCAAAATGGTATTTCA<br>ATTGGCTCAATGCTTTGTCTCTGTTCATCA   | G         | A       | GGAGCTGTCAAGTGCCTCCGTTTGAACAGT<br>TTACGGCAGACCCTGCCATCATTAAACAAGGTTT<br>GTACCTAGGGAAGCTTAGAAGCAGTGGTACAA<br>GAC  | NA                         | NA                          |

| Marker IDs   | Genetic positions (cM) | Chromosomes               | Physical positions (bp) | Flanking sequences/Forward primers                                                                           | ICC 12968 | ICC4958 | Flanking sequences/Reverse primers                                                                               | Annealing temperature (0C) | Amplified Product size (bp) |
|--------------|------------------------|---------------------------|-------------------------|--------------------------------------------------------------------------------------------------------------|-----------|---------|------------------------------------------------------------------------------------------------------------------|----------------------------|-----------------------------|
| Ca-II-SNP211 | 23.12                  | Ca- <i>desi</i> -LG(Chr)2 | 519934                  | TCTTATTGGATTGTAGGATCTAGTTTATAGTGAG<br>ATAGAAGGCACAATGCCTTTTCTTGGTTCAATCT<br>ATTTTTCAAATAAAAAATTCTCTAAACCTC   | C         | T       | ATAAAAAATAAAAAATAAAAAATTTACCCTTAG<br>ATGATTATGAGCCGATGAATTGAAAAGTGAAGT<br>AAGAAATCAAATTGAATTGAATTTGAAAGAAAT      | NA                         | NA                          |
| Ca-II-SNP212 | 24.10                  | Ca- <i>desi</i> -LG(Chr)2 | 539372                  | CGATATATGTCATCAAGTGTATTGGTGTGTTAGTC<br>ACGGGATTTAGTTGCATTATATGTCAGTAACGACC<br>GACGCAGTGGTCCCATTATTGATGTATGTG | G         | A       | TTTTACATGGGTAATATATTTTAATAATTATAT<br>CAGAATCTTTAGACGCACATCTGAATGCTATC<br>TATTTTAGATTTCTCCTTTACAATCTGGTCCA        | NA                         | NA                          |
| Ca-II-SNP213 | 25.08                  | Ca- <i>desi</i> -LG(Chr)2 | 604529                  | AAAGCTTCTAAAGATTTGCAGGATCCTCTTCTAA<br>AGTATAGGTCCGATATTTTGATCCATAATTTT<br>CAACTCTGACTCTTACTTCTTCAAGTTT       | C         | A       | TGACTTCTATGAAAATAAATTCCTTTCAAATGG<br>AGAAATAGTGGGGGAGCGAATCAAGTCACGT<br>TCCTATATCTATAAGCACCAACAAGGCGAATC<br>A    | NA                         | NA                          |
| Ca-II-SNP214 | 26.06                  | Ca- <i>desi</i> -LG(Chr)2 | 616399                  | TATGTTATATGAATATTTTTTTAAAGCCTTTTAC<br>AACGCTTTTTCAAATAAGCACTCTCAAAGGCCTCC<br>TTATTTATTTTTAAAGGGTCTTTTACA     | A         | G       | CTGAACTGAATATAAATTAGTAATTTACATGAAT<br>TGAAAAGAGCCTTAAATATAAAAATAAAACAAT<br>GAGGTTTTTACAGCGCTTATTTGAAAAGGG        | NA                         | NA                          |
| Ca-II-SNP215 | 27.04                  | Ca- <i>desi</i> -LG(Chr)2 | 642761                  | TTCTGATAGTGCAATTAACATTGATGGTGATCTC<br>CTAAATATAGTATTATTAGCAGAAGCTGAACCTGT<br>GTCGCTAGAGGAAGCACTGGCTCACCCCTCA | T         | C       | ACTTCACTCTATAGCCTTCTTATTTCTTGCAA<br>GCTTACCATTCCAGGTTTTGTTCTTGGAAT<br>TGATCTCAATTCCTCATCCATAGCATCCTTCCA          | NA                         | NA                          |
| Ca-II-SNP216 | 28.02                  | Ca- <i>desi</i> -LG(Chr)2 | 651196                  | TTTAAACAAGCGACTACATCACCGCGATTAATCCG<br>GTAAAATTTCCGCTTTGACGCTCGCTTCCGAAGTT<br>GGCTCACTAGCACCGTAGCAGGGAGATGAG | A         | C       | AAGAAAAACGGTATTAGGGTTTTTAAACCGT<br>CAAACACAAACCTCCACTTTTCTTCCGACGTTCCG<br>AGCTTCGTTTCGAGAAGTGATAGAAGGGAAAG<br>TT | NA                         | NA                          |
| Ca-II-SNP217 | 29.00                  | Ca- <i>desi</i> -LG(Chr)2 | 741960                  | ATTCTCATTTTATTTATTCTATTTTGACAGATTTT<br>TTTATTTTCCCTTCAGATTTTGTGCAAAATTA<br>TAAATAAATTTAATTTTATGATGT          | C         | T       | AAAATCTAGTAAAAGAATTTAAACTCGTGTTTA<br>ATCGAATATTTAATTGAAGTTCATTAATAATTTG<br>AATCAAATATTTAATTAATAAATAAGAG          | NA                         | NA                          |
| Ca-II-SNP218 | 29.98                  | Ca- <i>desi</i> -LG(Chr)2 | 794468                  | TGCAACCTCTAATGTTGCACTGACATTGATTATTA<br>ACAATGTGATTTGCCAAAGCCACTAATTTCTAAG<br>TCATGCAATTCTGCCTTCGACTTATATTAT  | C         | T       | GGTTAAATCTGTTCATAATTAATTTTTTCAA<br>TCAAAGCTTTTACTTTCCATTAGAGTCATTGAC<br>TTTCTCGTTTGAGTGAGATGTTGTGTTTTTGG         | NA                         | NA                          |

| Marker IDs   | Genetic positions (cM) | Chromosomes               | Physical positions (bp) | Flanking sequences/Forward primers                                                                           | ICC 12968 | ICC4958 | Flanking sequences/Reverse primers                                                                               | Annealing temperature (0C) | Amplified Product size (bp) |
|--------------|------------------------|---------------------------|-------------------------|--------------------------------------------------------------------------------------------------------------|-----------|---------|------------------------------------------------------------------------------------------------------------------|----------------------------|-----------------------------|
| Ca-II-SNP219 | 30.96                  | Ca- <i>desi</i> -LG(Chr)2 | 824124                  | GAGTTTGAGGAAGGAGATCATGTTTTTTGAGAGT<br>TACCCCCACCATTGGCATTGGAAGAGTGCTAAAG<br>GTCAAGAAGTTAAACCTCGTTTTGTGGAC    | C         | T       | CTTAACTGGGAGACGTGAAAAACATTGTGTAG<br>ATTGGACAGTTTGGGTGGCAAGGCTATTCTGTA<br>TGCAGAGGGACCAATCCTCTGCAATATTTGAAA<br>G  | NA                         | NA                          |
| Ca-II-SNP220 | 31.94                  | Ca- <i>desi</i> -LG(Chr)2 | 851921                  | CTATTA AACGGGCTACCAACCCATATAAGGTCG<br>GTCCTAATGGGTTGCACGCTTCTTAGGATCATGC<br>CAAAAAACCTGTTTTAATATGGGCTGATAA   | A         | T       | AAGAAATTAATAATAACGAGTCAAAAAAAT<br>ATTGTAATAATGTGCAGGTTACCCGCTCAATT<br>TGAAACTCGCCTAGGACCAGACAGATTAGTAT           | NA                         | NA                          |
| Ca-II-SNP221 | 32.92                  | Ca- <i>desi</i> -LG(Chr)2 | 865647                  | CAAGACACTAGCTTTTATCAAGATTCGTAATCTTAT<br>GCTCACAAATAATTTTTTTTTTTCAGTTTTAGAGA<br>CTTCAATTTTTATTGTTTGGTTCCTT    | G         | A       | AAAGAAAAACAAGTAGTGAATTTGTTGTTATTTT<br>GACTACCAACAAATTCCTTAAGTAAATGTCATAACT<br>TATAAATTTTTTATATACAAAAATAAGATTG    | NA                         | NA                          |
| Ca-II-SNP222 | 33.90                  | Ca- <i>desi</i> -LG(Chr)2 | 874315                  | TAGTCAATATATGAATTACTTGTAAATTTGTTTG<br>AAGAATGAGTTGAATTCATAACTTTGCTGTCACAA<br>GACTTGAGATAGATTAGTCTTTGAGTTG    | T         | C       | GAGAGACCTGACTATTAATAATTTGTTTCA<br>TTAACATATCAGATTGAAGAAATTTTTAGTTG<br>AATTTTTTAGTGTAAGTTGGGTATTTTCATAC           | NA                         | NA                          |
| Ca-II-SNP223 | 34.88                  | Ca- <i>desi</i> -LG(Chr)2 | 886887                  | AACAAAAACCGTAGAGCTTGACAATGTTACGATGT<br>TGAATTTCTATCAGAGTTTTGATCTCATTTGTGAAA<br>GCTTTCATAGTAGACATTTCTTCATTTGG | C         | T       | TTGATGACAAATATCTCATTGGAGTTGGAGGGA<br>ATGGAAGTGTTCACAAAGCAGACTTACCCACGG<br>GTCAAGTTGTTGCTGTCAAAAAAATGCATTGAG<br>T | NA                         | NA                          |
| Ca-II-SNP224 | 35.73                  | Ca- <i>desi</i> -LG(Chr)2 | 909741                  | GTATCATTGAATGGTTTTTCTTCACATAAATAAAC<br>ACGGTACTTGTGAGGTCGACGCGTCTGTTTTT<br>GTGTTAAATTTGTTGATTGTATACAAACA     | A         | G       | AAATTAAGGACCTCTTATACTAAAACATTTCAA<br>ACAAATATACAAGCACTTATGTCATAATACGAG<br>TTCAAATGAGCTATGAATAAGCTCTTAAAAAG       | NA                         | NA                          |
| Ca-II-SNP225 | 36.58                  | Ca- <i>desi</i> -LG(Chr)2 | 922816                  | GGAGTCTATAATACGTGTGAAAGTCATGTGTTGA<br>GTCGTGGTTATGGGTTATTATGTATGGGTGTCATG<br>TAAGCATCTGTGATTAATTATTAATAAAT   | G         | A       | GAATTTGATGCATTA AACGATAAGAACAGAAC<br>ACAAGATATTTGAAATATCTCAGTGAACCTTA<br>GGCTTACCAAACAAGTTTACGCACATATTTAA<br>A   | NA                         | NA                          |
| Ca-II-SNP226 | 37.43                  | Ca- <i>desi</i> -LG(Chr)2 | 1081581                 | AAAGTTACCTCTCTGTGACTCAGCTGACACACC<br>CTGTCTTGTGTAGAAACTGAGACCAGTCTGTAA<br>CCCATACCATACTGCAGGGGCGCTGCGGG      | T         | C       | CTCATTGACCGGTTCCACTCACATGATCTTGG<br>ATCATTGAAAAATGGATTCATTGGTGGAACTGA<br>AGACAAGTTGCTTGTCTCCACAGACCTCATTCAA<br>G | NA                         | NA                          |

| Marker IDs   | Genetic positions (cM) | Chromosomes      | Physical positions (bp) | Flanking sequences/Forward primers                                                                          | ICC 12968 | ICC4958 | Flanking sequences/Reverse primers                                                                               | Annealing temperature (0C) | Amplified Product size (bp) |
|--------------|------------------------|------------------|-------------------------|-------------------------------------------------------------------------------------------------------------|-----------|---------|------------------------------------------------------------------------------------------------------------------|----------------------------|-----------------------------|
| Ca-II-SNP227 | 38.28                  | Ca-desi-LG(Chr)2 | 1100915                 | CCTCTTGACTCATTATAAGCAAATTAGCTACTTT<br>CACACTTATTAATGATGATAGCCAAGTGCAATTTAG<br>GGTTTTTTGGATTAACCTATTTGAGCTT  | A         | T       | GGATAGCTTATGAAAATTAGCTGAAAACACCTT<br>ATTGACATGCCATAAGCTGTTTCCATAAGTTTC<br>CCCAAACAGTTTCGCAAGTGTATGTTGGTAG<br>A   | NA                         | NA                          |
| Ca-II-SNP228 | 39.13                  | Ca-desi-LG(Chr)2 | 1122632                 | TGAGGGAACAAATGGGTTTGTGTAGATGTTGAT<br>GCTAATGTTGGTATGGTGAAGTTTGTCTGCTGCTG<br>CTATGGGGTCCGTGTTTTGGCGTTTGAGCCT | A         | G       | ACTTCATCACCAACAACAACAACACTACCAACA<br>TTAGCACCAACATCCCAACTCTATTAAGTAA<br>ATTCTTTCACAAATCTTCTGCAAATTCAAAAA         | NA                         | NA                          |
| Ca-II-SNP229 | 39.98                  | Ca-desi-LG(Chr)2 | 1156903                 | CTTTTGATGATATCAGCCTTTATACTGGTCACATT<br>CGATTATGCAGCACTGTAGTAAATATCTACCAGA<br>GAGGTGTTTGAGACAATTCGGATATATCA  | A         | G       | ACTTGTGAAATAGCTCTGTCACTGGCATCACAT<br>ATCCCAACCATTCCACATCTACATCAAATAATCT<br>AGCATGATCTGGAAGTGGCGGTGAAGGAATAT<br>A | NA                         | NA                          |
| Ca-II-SNP230 | 40.83                  | Ca-desi-LG(Chr)2 | 1181100                 | CATATTTTTAATATTTTATAATAATATTTTTT<br>TGATTTTTTTAATATTTATAAGTACAATATTT<br>GTATTGTGTTTTTATGTATTAGTGA           | A         | T       | ATTAATAATATGATTAGTAAATATCTATAATTG<br>ATGCATGAAAAGCGCATTGACAAATATTCAATAA<br>TAATAATATAAAAAATTACGAGACAAATATTT      | NA                         | NA                          |
| Ca-II-SNP231 | 41.68                  | Ca-desi-LG(Chr)2 | 1245390                 | CGACGACGACGGCGCTGCGGTGCTGATGGC<br>GGCGTGCAAGAAAGTGAGAGTCGATAGAGAAGAG<br>GGACAGCGGCTGATATGTTGTCAGAGAACAATC   | G         | C       | AAACTTTTAAAACAAATTTGAAGTGGGCTGGGC<br>CACACACGTGCTACAATGGGAAGCAAGGCTGT<br>AAGGCGGAGCGAATCCGGAAGATTGCCTCAG<br>TTC  | NA                         | NA                          |
| Ca-II-SNP232 | 42.53                  | Ca-desi-LG(Chr)2 | 1272206                 | TCTACTTCATAGTGTGGTACCATTATAACTCTAAA<br>GTACTTGGTTAGGAAGTGTGATACTATGTCACCAT<br>CCCGGTGAACAGACAATTCAAATGTCCAT | G         | A       | GGAGGTGCAATCCAATGTCGGGAGCTATCA<br>TGCAACACACGTCTACCTCGATTGTCGCGTATA<br>TGTGTCTCGGTTGAGTTAAGGAGATCTATGA<br>GGA    | NA                         | NA                          |
| Ca-II-SNP233 | 43.38                  | Ca-desi-LG(Chr)2 | 1288366                 | ACAGTGAAAGGGTGGGATGGGATGTTTCTGCTA<br>TTGAAATGGTTAGTATTCTTGTCTGCATTATTGT<br>TCAAGAACCCTAAGACTGAAGGAGCTTCATG  | C         | T       | GGATAAATTGGTCTTTTTTTGTTTCCAATTCA<br>AAATAATAAAATTTGAATTTTTCATTAGTTCCATC<br>TCATTTTCATTGACTACTAGATATCCAATACA      | NA                         | NA                          |
| Ca-II-SNP234 | 44.23                  | Ca-desi-LG(Chr)2 | 1424536                 | TCGGTTATCGATAATTGTCCAAAAAATATTCTCC<br>ATTTTCTTCAAATTTTCAGTATGTTGTTCACTCAT<br>TTAATTATCAATTAACACACTTTCACG    | A         | G       | ACTCAAATTAGACTTACGATGAAGAATAACGGT<br>GTGCAATAACGAATTCATAAACTTATAAGTTG<br>AGTATTTTATAGAAAATTGAGATTGTTTAAAAAT      | NA                         | NA                          |

| Marker IDs   | Genetic positions (cM) | Chromosomes      | Physical positions (bp) | Flanking sequences/Forward primers                                                                            | ICC 12968 | ICC4958 | Flanking sequences/Reverse primers                                                                                                                                                                                                                                                              | Annealing temperature (0C) | Amplified Product size (bp) |
|--------------|------------------------|------------------|-------------------------|---------------------------------------------------------------------------------------------------------------|-----------|---------|-------------------------------------------------------------------------------------------------------------------------------------------------------------------------------------------------------------------------------------------------------------------------------------------------|----------------------------|-----------------------------|
| Ca-II-SNP235 | 45.08                  | Ca-desi-LG(Chr)2 | 1432725                 | TATGTTTATGGAACAAGAATTGTTGCCCTCCT<br>CCCGCTTCCATAAAAATTTAAATTTTTTCTCTTT<br>GGTTAGTTTACAATAACTCATGAGTTT         | G         | C       | AAAGTATTATGTAAGTTCAAAAACAAAACAAA<br>AACAAACAACAATCGTTTATTTATTTTATAA<br>TTCAATTATTACATATAAATGAGTCTTTTT                                                                                                                                                                                           | NA                         | NA                          |
| Ca-II-SNP236 | 45.93                  | Ca-desi-LG(Chr)2 | 1450638                 | GTTACATTGTGGTATTAGAGCACTATTTCTCGAC<br>CTTGGTGGGATGGGACGCTTCGTATGTCCGAT<br>GTTTTCTTGTGATATGTTATTCATGTTAAT      | T         | C       | TGTAATTCTTAAAAATTCAAATTCAGAAGGTTA<br>CATAATTAATGACATATAATGGACATTTAAATAA<br>TTAGTAAATCTCAATAATAGAAAATTATAC                                                                                                                                                                                       | NA                         | NA                          |
| Ca-II-SNP237 | 46.78                  | Ca-desi-LG(Chr)2 | 1506588                 | TTTTAAAAGTTTGATGTGTGAGAAAGATTTAATATT<br>GGGAATTTCTGTTGTGGTTGGATTAGTTTTATTGTG<br>AACAAATGTTATAAATATTTATGTTTTAT | A         | G       | CCATAAATCACCACAACAACATTAATATATCAGA<br>GTTCTCCCCATCTAACTCGGTGCTAATGGTC<br>TCGATTCTTTTTCGAGACTCAATGAGCTAACTA                                                                                                                                                                                      | NA                         | NA                          |
| Ca-II-SNP238 | 47.63                  | Ca-desi-LG(Chr)2 | 1649749                 | GAAGAGGCGTCATCAATTGCATTCCTTCTTCTT<br>GCATAGCTTCGTAGACATCCTATAGATAGAAAGTGA<br>AACGTTGCTCCTTTGCAACCATTAGAGGTC   | C         | A       | ATGTTCTTGATATTCGTCTCAAGTTGATTTTATT<br>GAAAGCTTTGGATATTAAAGGTTATCAACTTAC<br>TTTGGTAGTGGTGTATATGAAAATCACTAAA                                                                                                                                                                                      | NA                         | NA                          |
| Ca-II-SNP239 | 48.48                  | Ca-desi-LG(Chr)2 | 1673041                 | CGACGACGACGGCGCTGCGGTCGTGGTGATGGC<br>GGCGTGCAAGAAAGTGAGAGTCGATAGAGAAGAG<br>GGACAGCGGCTGATATGTTGTCAGAGAACAATC  | T         | C       | GTAGATAAGGTAGAATAGTTGCAACGGTTGTTG<br>TGTGTTGTGTTTGTGATAATGGCTTCTCCACA<br>TCAATTCATTGCTCTGTTTCACTTCTTCACTTC<br>CCAAACTCACC AATTTCAAACCAATAATTTCTT<br>CTCTTCAATCCAACAACCCTAACTCCATTCT<br>CTCATCATCCCTCTCCACCGTCAGATCCTCCGC<br>TTCTTCTCTTTCTCCTCAACAGCATTGGAAGA<br>TAGTCTATGACCATTCATTAAGTTACCCCTT | NA                         | NA                          |
| Ca-II-SNP240 | 49.33                  | Ca-desi-LG(Chr)2 | 1781378                 | GATTATCTCATTTGTTGAGTTTTATTGTAATATA<br>TTTGTGTTGAGTTTTGTTGTAATATATAATTGACC<br>CCCACAATGGTAAATATTTCTCTAAATTT    | C         | A       | TTGTATATTTACTTTATATTCTACTTTACAAAA<br>TATTGATTTTTAGTCTAAAAACAAAGATTTTTTT<br>TGCTTATAGTGTATTTTTCTCTTCAAAATTA                                                                                                                                                                                      | NA                         | NA                          |
| Ca-II-SNP241 | 50.18                  | Ca-desi-LG(Chr)2 | 1801000                 | CTGGACTATCACCTTCTTTTCTCAATCAAGTATGT<br>AAACTTGTAAATCTCTTTATGGCTGAAGCAGGT<br>TAGTAGACACTGGCATGCAAAACTTTTATA    | T         | G       | CATCAACATATATGGCCAAGGCATTAACGACT<br>TGCTAGTATGTTTAAATCAATAATAAATGGTCTG<br>GTGTGGCTTGCTTATAACCAATAATTAATGAAA<br>C                                                                                                                                                                                | NA                         | NA                          |
| Ca-II-SNP242 | 51.03                  | Ca-desi-LG(Chr)2 | 1818420                 | TCAAGTCATTTAAAGTTTTTTTTCTCGATTAGTTTT<br>GGTAAGTTATATTAGTTTACATTTTATTTTTTGT<br>CTCACTTTCACCGAGGATTAATGCATTT    | G         | A       | TGTAGATTGTTTATAATGTTAATGAATGTTTTT<br>TGAATAATTAATTTGAGGAACATATTGTTGCAG<br>CCTTTGACAGAGTTTCTAATAACCACATGCTTT                                                                                                                                                                                     | NA                         | NA                          |

| Marker IDs   | Genetic positions (cM) | Chromosomes               | Physical positions (bp) | Flanking sequences/Forward primers                                                                           | ICC 12968 | ICC4958 | Flanking sequences/Reverse primers                                                                                                                                                                                                                                                                                                                                                                                                                                                                                                                                                                                                                                                                                            | Annealing temperature (0C) | Amplified Product size (bp) |
|--------------|------------------------|---------------------------|-------------------------|--------------------------------------------------------------------------------------------------------------|-----------|---------|-------------------------------------------------------------------------------------------------------------------------------------------------------------------------------------------------------------------------------------------------------------------------------------------------------------------------------------------------------------------------------------------------------------------------------------------------------------------------------------------------------------------------------------------------------------------------------------------------------------------------------------------------------------------------------------------------------------------------------|----------------------------|-----------------------------|
| Ca-II-SNP243 | 51.88                  | Ca- <i>desi</i> -LG(Chr)2 | 1854096                 | TAAGCCTGCATTCTGTAATATATGTATGTATTGT<br>GTATTATGTTTTATTACTCCCTAGTTAACTCGACAG<br>CTTAACACGAATAACGCGGAGCTTTCTC   | A         | G       | AAATGAGGTATTTTTCTTTGGGAAGCGAAGCG<br>ACCTAGTCGAGCTATTGTCAAGTTAAGCAGTTCT<br>CTCTTGTCGAGCTAGACTCTACTCGCACTATAG<br>T                                                                                                                                                                                                                                                                                                                                                                                                                                                                                                                                                                                                              | NA                         | NA                          |
| Ca-II-SNP244 | 52.73                  | Ca- <i>desi</i> -LG(Chr)2 | 1918740                 | TCATGGATCTCATGGAAGAATGTTGGAAAAGTT<br>GGATCAAACGAATAGCGTTTTTCGCGTTTTGTTTTG<br>TTGGAAGAGAAGAATTTGTGTTTGAAATTTG | T         | C       | CTTCCTCTTTTCGCGCCTCTGCAACCACTGTAGA<br>ACCAACTAGAGATGAATACACTTGTCCGAGAAG<br>AAAACGCCGACGGCGAAGCCAGCACAAGAAGA<br>ATCCAAGTCCGTTTCATTACTAAGTTATCCGAA<br>CCTTTCAAAGTCCATCCTCAGCCATCGCCATC<br>CCCGCTGATCTCACCAGATTCGGCCTCTCATCT<br>CTCGTTAACGCCCTTCTCCAATCCAAATATGAT<br>CATTATCAAACCTCAACCTTTTCATTTTTGATC<br>GCTTTCTTATGTGACAAACTTTATTGAATAAGC<br>ACTTATTTAAATTGTTTTATTCAAGTACACCTCAT<br>ATCACACCGCACACAACACGAGAATTTCTATCAC<br>ATGGATTGAATCCAAATCAGTGATTAGCCTAA<br>TCTACTCCCAAATCCATTTTTATTATGATCAG<br>ATTCAATCTTTAGATTCATCATCTTCTTTCCATT<br>CTACTATTGCCAAAGTATGGCGGCCGCCACAA<br>CCAAACCACTTTCCCTATCCAAAGTCCCGCCCGC<br>TAATTAATTGGTTAAACATTAGGATAAAATAAGT<br>GTAGCAGAGTTGCGAATGTTGTATTGGATGTGT<br>GGAAAGACTAGACAAGATAGGATTAAGAATGAC | NA                         | NA                          |
| Ca-II-SNP245 | 53.58                  | Ca- <i>desi</i> -LG(Chr)2 | 2170610                 | TGCTGATCTATGAGAGATTGCACCTTGGTAACTAG<br>TGTTGGTCTGTGAGAGGCTGCACCTAGAAAATC<br>GTGTTGATTTGTGAGCGATTGCACGCTAGTA  | T         | C       | GCTTTCTTATGTGACAAACTTTATTGAATAAGC<br>ACTTATTTAAATTGTTTTATTCAAGTACACCTCAT<br>ATCACACCGCACACAACACGAGAATTTCTATCAC<br>ATGGATTGAATCCAAATCAGTGATTAGCCTAA<br>TCTACTCCCAAATCCATTTTTATTATGATCAG<br>ATTCAATCTTTAGATTCATCATCTTCTTTCCATT<br>CTACTATTGCCAAAGTATGGCGGCCGCCACAA<br>CCAAACCACTTTCCCTATCCAAAGTCCCGCCCGC<br>TAATTAATTGGTTAAACATTAGGATAAAATAAGT<br>GTAGCAGAGTTGCGAATGTTGTATTGGATGTGT<br>GGAAAGACTAGACAAGATAGGATTAAGAATGAC                                                                                                                                                                                                                                                                                                        | NA                         | NA                          |
| Ca-II-SNP246 | 54.43                  | Ca- <i>desi</i> -LG(Chr)2 | 2325857                 | GCAGAACTACAGGTCTCCTCCCGACATGCCAG<br>ACCACTTAAGCTGAGTTTCTACCATCTTTTCTACT<br>ATAGGTGCTACCTCAACTCTCTCTAATGT     | T         | A       | TAATTAATTGGTTAAACATTAGGATAAAATAAGT<br>GTAGCAGAGTTGCGAATGTTGTATTGGATGTGT<br>GGAAAGACTAGACAAGATAGGATTAAGAATGAC                                                                                                                                                                                                                                                                                                                                                                                                                                                                                                                                                                                                                  | NA                         | NA                          |
| Ca-II-SNP247 | 55.28                  | Ca- <i>desi</i> -LG(Chr)2 | 2366447                 | CGAGATTTTTACAATTTTACAATGACGTGAACTC<br>AGTTCAAGTATGTTTACGTGAACTCAGTTCAAGTA<br>TGTTTACGTGAACTCAGTCCACGTACACCA  | A         | T       | TGTAATATTACGTGAATTGAATTCACGTATATTG<br>TAAAATTGTAATAATCACAGGTAGTACGTGATT<br>TAAGATTGCGTAATTAATGGAGTTTGAGACTTA                                                                                                                                                                                                                                                                                                                                                                                                                                                                                                                                                                                                                  | NA                         | NA                          |
| Ca-II-SNP248 | 56.13                  | Ca- <i>desi</i> -LG(Chr)2 | 2470350                 | TTCCAATCGATTGTTTCTGATGAGTTTGGTTCTGT<br>GAATCACAAAATCGATTACTCAATGATGTGCAAA<br>TCGATTGTTCCAATTGATTTGTTAAACACA  | T         | G       | ATCGATTGAACAATCGATTGCCAGACTCACAGA<br>ATGAAGTTTTCACTAAGTTAATCGATTGGGAAA<br>TCGATTACTTAAAGTTTTATCAAACCTATGTT                                                                                                                                                                                                                                                                                                                                                                                                                                                                                                                                                                                                                    | NA                         | NA                          |
| Ca-II-SNP249 | 56.98                  | Ca- <i>desi</i> -LG(Chr)2 | 2502854                 | TTTGCTCGAACCGACCTATCAGCTCAAGCTTCCGT<br>TCAGATTTTTTCTGGGCTTTCCCCACATACCACT<br>GCTTTTTGTCAAATTTCTTTCCATTCAATG  | C         | T       | CATTACTAGTGTGTTTTGATGAGAGATGCAGA<br>CGGTAGGTCAAAGTGTGTTTTGGTTTTGTCAATTT<br>CGAAAATCCAGACAATGCTGCTAATGCTGTGGA<br>G                                                                                                                                                                                                                                                                                                                                                                                                                                                                                                                                                                                                             | NA                         | NA                          |
| Ca-II-SNP250 | 57.83                  | Ca- <i>desi</i> -LG(Chr)2 | 2576058                 | TGTTGGCATCCATTTAAATCTTATCCAAATATGCC<br>TTTAATTTGTGAGGATTTTTGTTGGAGATTAACA<br>CTTGACATTACTTAATCTGTGTCTTCTTTG  | T         | C       | TTCTGTATAATTAAGAATGCCAAATTTAGTTATT<br>AACATCTATAAACACATACTAATATGAAACCACA<br>TTTGACAGAAACACATGCTCAAAAACAGAAGG                                                                                                                                                                                                                                                                                                                                                                                                                                                                                                                                                                                                                  | NA                         | NA                          |

| Marker IDs   | Genetic positions (cM) | Chromosomes               | Physical positions (bp) | Flanking sequences/Forward primers                                                                            | ICC 12968 | ICC4958 | Flanking sequences/Reverse primers                                                                               | Annealing temperature (0C) | Amplified Product size (bp) |
|--------------|------------------------|---------------------------|-------------------------|---------------------------------------------------------------------------------------------------------------|-----------|---------|------------------------------------------------------------------------------------------------------------------|----------------------------|-----------------------------|
| Ca-II-SNP251 | 58.68                  | Ca- <i>desi</i> -LG(Chr)2 | 2705575                 | GCCACTTTTTCCCACAGCCACATTCTTTTCTTCTA<br>TGTGCCGTACCTTGTGGAGGTTTCATACAGCCAA<br>GCCTTTACATTGATTTCTCTTTCAACCCAT   | G         | T       | CAAACAAGACAACCTCTGTTCAAGAATTTCTCAC<br>AAAATTTGAGAAATATGCAGGATCTTTCAAGGG<br>GATTGATGAACATTATTTGATAGAGATCTTTATA    | NA                         | NA                          |
| Ca-II-SNP252 | 59.53                  | Ca- <i>desi</i> -LG(Chr)2 | 2765925                 | TCATGGATCTCATGGAAGAATGTTTGAAAAGTT<br>GGATCAAACGAATAGCGTTTTTCGCGTTTTGTTTTG<br>TTGGAAGAGAAGAATTTGTGTTTGAAATTGT  | C         | A       | GTCCGGTCCGTCGGATTAACATTTCCGGCGG<br>TTCATCCCTGCGTGAACATTGCTCCTTCCACTC<br>TTCTCTTCCCTCATCACTCTCTCCGACAGAA<br>TT    | NA                         | NA                          |
| Ca-II-SNP253 | 60.38                  | Ca- <i>desi</i> -LG(Chr)2 | 2803005                 | TGCTGATCTATGAGAGATTGCACCTTGGTAACTAG<br>TGTTGGTCTGTGAGAGGCTGCACCTAGAAAATC<br>GTGTTGATTTGTGAGCGATTGCACGCTAGTA   | T         | A       | ACTAGCGTGCAATTGCTCACAGATCAGCACATT<br>CTAGAGTGCAGCCTCTCATAGACCAACACTAAT<br>TACCAAGGTGCAATCTCTCACATATCAGCACGA<br>T | NA                         | NA                          |
| Ca-II-SNP254 | 61.23                  | Ca- <i>desi</i> -LG(Chr)2 | 2848860                 | ATTTGATCTTATCTATTGGCATAAATACTTGTGGG<br>ACTGTTTTGAAGAGTTTGTGAAAATAACTTATGAC<br>ATTTCCATAAACTGCTTACAACCTTATTTTC | A         | T       | CTTATGTATAAGTTATTCCTATTAGTAAAGATAA<br>AAATTATAGTCAATATTTTTTCATATAAACTAAA<br>AGTTGTTTTCATAAAGCTATTCTAGAGAGCTTA    | NA                         | NA                          |
| Ca-II-SNP255 | 62.08                  | Ca- <i>desi</i> -LG(Chr)2 | 2883759                 | TTAAGCTGGTTTCAATGGTGGGAGAGGTGCAATC<br>CAAATCCTTCATGGGATGCTTTCAAGGTGGCTGT<br>CATAAGGAGATTTCAACCATCAATGATTCAAA  | G         | A       | TTGATCAATTTCTCTTAGAGCGCCAACATACTT<br>CTCAAAATCCTCCACATACTTCCACTGTACC<br>AACCTGTTTCAAAGATAGCAACAATTCAAAAGG<br>A   | NA                         | NA                          |
| Ca-II-SSR58  | 62.93                  | Ca- <i>desi</i> -LG(Chr)2 | 2952192                 | CAATGTGCTAGATTCGCAGTG                                                                                         | (AT)8     | (AT)6   | AGGGAAGTTGGATTCCATGC                                                                                             | 59.50                      | 116.00                      |
| Ca-II-SNP256 | 64.63                  | Ca- <i>desi</i> -LG(Chr)2 | 3195855                 | TTGGTAACCTTCCCCTTTCTGTTAGTCTTTTTAAT<br>CGAATAAAATAAATAAATGTATACTTGGTGTGTC<br>ATGTTTTGCATTGTATTACATTTTTAG      | T         | A       | TCATTCTATGTTTCAATCCTTTCTACTGTATAGA<br>AATCTTCCAATAAATTAACCTAGTTTCTACATAA<br>TCAAAAATATAACAAGATAGTTCTCCACTACTAC   | NA                         | NA                          |
| Ca-II-SNP257 | 65.48                  | Ca- <i>desi</i> -LG(Chr)2 | 3220112                 | CGCTTACTGATCTACGTGTATCAGGACAGGATGC<br>CCAGTCTGAGTCAGAAAAGCCCTTCAGTTGGAGG<br>GCAGAATTTGCAGACAGAAAATGCCTAATGT   | A         | C       | ATCAGTTTTTTGTAGAACAACCTCAGCCAACATA<br>TGAATTCCTCTTCAATCACTCACTACGAGGCAG<br>CTATAAGAGTATTGAAATATCTCAAATCTTCTCC    | NA                         | NA                          |

| Marker IDs   | Genetic positions (cM) | Chromosomes               | Physical positions (bp) | Flanking sequences/Forward primers                                                                            | ICC 12968 | ICC4958 | Flanking sequences/Reverse primers                                                                              | Annealing temperature (0C) | Amplified Product size (bp) |
|--------------|------------------------|---------------------------|-------------------------|---------------------------------------------------------------------------------------------------------------|-----------|---------|-----------------------------------------------------------------------------------------------------------------|----------------------------|-----------------------------|
| Ca-II-SNP258 | 66.33                  | Ca- <i>desi</i> -LG(Chr)2 | 3229500                 | AAGCCACATCTACAGCCTCACATCGTTGCCGCCG<br>TCACTATCACCGTCTTCACCATCGTCGTCTCACCC<br>TACCCTTCACCATCGCCGCGCTTGCCCAT    | C         | T       | CTTTGAAGAGTTAATATGTTTTTTGAGCCGTTTT<br>TCATAAATAAATAAAGTTTTCTAATGGATCAAATC<br>CAAATACAAAAGAGTAACTTCGACGAGACCCA   | NA                         | NA                          |
| Ca-II-SNP259 | 67.18                  | Ca- <i>desi</i> -LG(Chr)2 | 3268614                 | TAGACTCAAATCACTCTCGTAATTTTTTCATATTTT<br>TTTGTCTCTATTATTTCTCTTCTACTCTCTTTCCAT<br>TATACGAATAAGATTATATATTTTTTTTC | A         | G       | ATTATTTAAAATTATCTTTGTAATAATTTCTTAAAA<br>ATATCATTTTGACATGTGTTAAGAGTAAAAACAT<br>AACTACATATTTTTATAGAAATGAGGAGAAA   | NA                         | NA                          |
| Ca-II-SNP260 | 68.03                  | Ca- <i>desi</i> -LG(Chr)2 | 3293949                 | ACCTATTATAGAAGATTCATTGATCACTTCCTTTAC<br>CATACTAGAATCAGTCCATATTGTAGTTTTTAGCT<br>CAACAGTTGAGCCAGTTCATGCAAGCTC   | C         | A       | TAGAACAAAAGACTAAGGCCAAGGATAGAGAAT<br>GTCTGTACTAGTGCAGATTTGATATACTTCAA<br>CACACGAGTAGCTGCAGAAAATTCGTCTTCGGT<br>G | NA                         | NA                          |
| Ca-II-SNP261 | 68.88                  | Ca- <i>desi</i> -LG(Chr)2 | 3356963                 | AAGATTATAACATTTTATGGTGGGTGGTGACACCT<br>GATAGGCTCCAACCACTGTGAGAGGCTCAATGGT<br>GGAAAACCTGTTATTTGACTATTTATTTTCAG | G         | A       | CCAAAATATTTTTATATTATACCATAACCTTTAA<br>AAATTTACATTGATACCCTTAATTTTGATATTA<br>AATACCTTAAAATTTTATTTGATCTTATA        | NA                         | NA                          |
| Ca-II-SNP262 | 69.73                  | Ca- <i>desi</i> -LG(Chr)2 | 3404662                 | AATTTGGCGATTTTTCTTCTTTCTTTTCTTTCT<br>TAGTTTTCTTCTTCTCTTTTCTTCTTCTTCTTT<br>TATACTATTTCTTTTCTTTTCTTCTTCTTCC     | T         | C       | ACGGTAATTTAACAAATATCTAGATATTTGGAG<br>ATATTTGTTAAGTTATATTTATCTATATATGT<br>TTGGTTGGAGGAAAAAGAAAGGAAAAC TAGA       | NA                         | NA                          |
| Ca-II-SNP263 | 70.61                  | Ca- <i>desi</i> -LG(Chr)2 | 3423711                 | GACAAGTTTATATTTATTTTTATAGAAGTAACCA<br>GTCATTTTGTGCTTATTTTGCTAAGTTCTCTTATTT<br>ATTTCTTTCACATTTTATCGGAGCAATT    | C         | A       | ATAAAAGGAAAGAAGAGATTAGAAGGAAACTCA<br>TATGAGATATTTTTATTTTGAATATAATTGGAGG<br>TTGAACTACATCCAAAACACATAAGAGAATGCA    | NA                         | NA                          |
| Ca-II-SNP264 | 71.49                  | Ca- <i>desi</i> -LG(Chr)2 | 3435770                 | AATATGGCCGCAACTCGGATCTATCGAGTTATATG<br>TCACATTTGAGGATGGTAATCCATTATACGATATT<br>GGTCAACCATCATCCTCAACCACACCTCAC  | C         | T       | TTGGCCTGATCAAAGTATGGTTCGGGTTGGTAT<br>GGGTCGGGCTGTAAGATTATAATTTTGAAAA<br>GAATAAGTATTTTGTGTTTCAAATGGTATTTAG       | NA                         | NA                          |
| Ca-II-SNP265 | 72.37                  | Ca- <i>desi</i> -LG(Chr)2 | 3524491                 | AGTTTGTCTCTTCTGCAATGTGATATGATCCTAA<br>TAGTCATAGTTCACCTTAAAGATCGTTCTAGGTCG<br>GAAACTTACAAATTTGAGTGAAAATCGCGT   | A         | T       | TTCAAAGCCTAACTTGCCTTTCAGAACGTCAT<br>CTTTCACCTCGATTTGGAATCGGCCGAATCGG<br>AGTTTTCGAGTGCCGTTTATCACGTTCTCCAGC<br>CA | NA                         | NA                          |



| Marker IDs   | Genetic positions (cM) | Chromosomes               | Physical positions (bp) | Flanking sequences/Forward primers                                                                          | ICC 12968 | ICC4958 | Flanking sequences/Reverse primers                                                                                                                                                                                                                                                               | Annealing temperature (0C) | Amplified Product size (bp) |
|--------------|------------------------|---------------------------|-------------------------|-------------------------------------------------------------------------------------------------------------|-----------|---------|--------------------------------------------------------------------------------------------------------------------------------------------------------------------------------------------------------------------------------------------------------------------------------------------------|----------------------------|-----------------------------|
| Ca-II-SNP266 | 73.25                  | Ca- <i>desi</i> -LG(Chr)2 | 3559005                 | ACTGAAGGTTTATATGTCTGTCATTGACGAAATGT<br>AATGCGGAGTCGGTATTATGCAGGTGTATGTAC<br>ATGTTATGGTGGTGGATCATAATATAGAATG | T         | C       | TCCTCATGTTCACTCAACCCCTAATCAACCTCA<br>CAAGAACAACCATGCACCAACGACATAATCG<br>TCTTCATAATCGCCTCACCTACATATTGAACCG<br>T                                                                                                                                                                                   | NA                         | NA                          |
| Ca-II-SSR59  | 74.13                  | Ca- <i>desi</i> -LG(Chr)2 | 3592267                 | TGTGTCCCCAATAGACATTTTG                                                                                      | (CT)6     | (CT)7   | TCAAAAGCTGTGCAGTGGAG                                                                                                                                                                                                                                                                             | 59.72                      | 179.00                      |
| Ca-II-SNP267 | 75.89                  | Ca- <i>desi</i> -LG(Chr)2 | 3610564                 | TGATAATACACAGTTTGAATCATCCTCGGGTTGA<br>GGATCGATCTGTTTGAAAGTTAGTAAATCTCACA<br>AGGGTGTGAGGACTGGACGTAGCCATCTTT  | A         | G       | CTCGCTGAGGATGAAATTTTTCAAATCGTTAGA<br>TCTAAGTTGAGCAAAAGAGTAGGAGCAGAATAT<br>GAGAGACAGACACAATTTTATACTGGTTCAC<br>C                                                                                                                                                                                   | NA                         | NA                          |
| Ca-II-SNP268 | 76.77                  | Ca- <i>desi</i> -LG(Chr)2 | 3641530                 | TTATTCATATGTTTCATACACTTTTTTTTTGCTTTA<br>GTATATTTATTTATCATTTTTTTCATGAATACTTAA<br>GGTACATTAATTAATTTAAATGCGT   | C         | T       | TTAAATGATTTTTAATCTATTTGTATACAATTTT<br>ATAAAAGTGATTTTTAAATTACAAAATTACCATA<br>AAAGCATGACTTTTTAATTATTATTTTAA                                                                                                                                                                                        | NA                         | NA                          |
| Ca-II-SSR60  | 79.41                  | Ca- <i>desi</i> -LG(Chr)2 | 3785925                 | TTGATGAGTTAAGGAAATCTCAAAAT                                                                                  | (AT)9     | (AT)10  | ATGTTTTAAGGAATAGATGATGTTTTT                                                                                                                                                                                                                                                                      | 58.73                      | 148.00                      |
| Ca-II-SNP269 | 81.17                  | Ca- <i>desi</i> -LG(Chr)2 | 3799571                 | TGCTTTGCATTTCACTTCAATTTAAATTAACAATTAC<br>AATTGCAATTTCTCTCATTTAGCGCACCTTTTG<br>ATCTATTTAAAGCTTGCTTCGCAACATGA | C         | A       | TTTTTTTTTGTCTAAATTTAGTAAAGCTTGA<br>TTAACTCAATTTTATTTAGGTGTTTTAAATGTA<br>TAGAAAAATGTAACCATATCCAATACATGTTT<br>GTCCTCAAAAAGCTATCGGCAGAACCAAGTAG<br>TCTCCTTATCACTTGCTCTTCTTTGGTTCTTTTG<br>TATATTGAGCTATCAGAGCTTCGACGTCCTTCC<br>AGAGGAGGCCCTCAACTAAGACTCCATCCTTA<br>CTAAAGCACTCACTAAGACTTTCTCTAAGATCT | NA                         | NA                          |
| Ca-II-SSR61  | 84.69                  | Ca- <i>desi</i> -LG(Chr)2 | 3978441                 | CGATTCACACCTTGTGTTCA                                                                                        | (TC)10    | (TC)11  | AGGCTCTGAAATGAATGATGC                                                                                                                                                                                                                                                                            | 58.08                      | 146.00                      |
| Ca-II-SNP270 | 85.57                  | Ca- <i>desi</i> -LG(Chr)2 | 3999295                 | GATGATTGACTCTCCTTTCTATTTAACTGCCTTTAA<br>ACCTTATATTATGTTTACTATGTATGTCAAGATTT<br>CAGTTTGACCATAAAGAATCTACTTTAA | T         | C       | CAGCATCACAGAAACCTACTAACCTGACTCAA<br>GGATGACTTATAACACATGTCCAAATTAGTAGT<br>TTGTCTTAGATATCTAAAGATCCTTTTAAACAATA                                                                                                                                                                                     | NA                         | NA                          |

| Marker IDs   | Genetic positions (cM) | Chromosomes      | Physical positions (bp) | Flanking sequences/Forward primers                                                                             | ICC 12968 | ICC4958 | Flanking sequences/Reverse primers                                                                              | Annealing temperature (0C) | Amplified Product size (bp) |
|--------------|------------------------|------------------|-------------------------|----------------------------------------------------------------------------------------------------------------|-----------|---------|-----------------------------------------------------------------------------------------------------------------|----------------------------|-----------------------------|
| Ca-II-SNP271 | 87.33                  | Ca-desi-LG(Chr)2 | 4012391                 | CTCCCTCTATTTATAGACACATGTTTCATGTTTATC<br>TCATTTCGATGTGGGATTCTTTAACACACCTATGAC<br>TGAACATTTGGAATGTGATTTCGAGGATCT | C         | T       | AGATAAAGTCTGAACATATGTTATAAGTAAGAA<br>TAATCTTTACTTTAAAAGTCAATTTTGTAAAGGAT<br>AAATTAACCTCAACTCAAATCTAAGATAGTAT    | NA                         | NA                          |
| Ca-II-SNP272 | 88.21                  | Ca-desi-LG(Chr)2 | 4031210                 | TGATCAATCCCCCTTCCCATTCTTAAAAAATCT<br>GGAAACTAATGAAGCAGGGCTATCTTCTGGTTATT<br>TTTCTGTTGTGGAGCAATCTTAAATACATA     | T         | A       | AAATCAATATAGCTTTACCTGTGATTGCCATGT<br>ACCACTAAAGTCATGTATAACATAGAATAAATGT<br>ATGTTGGCACATCAACGTAGGCATATTAGTTTA    | NA                         | NA                          |
| Ca-II-SNP273 | 89.09                  | Ca-desi-LG(Chr)2 | 4040689                 | TATGACAAAACTTATTTAATCATTAGAGTATTCGG<br>TATATTATATGGTATTTGTTCTACAATACTACTAT<br>TTTGTATTGATCCTCTTTCTATGTTTC      | A         | G       | GAAGAGATTGAGAAAAAGAGAGAACTGACAGT<br>GCCGCCGCGGCCTCCGAGGGTGATATTGTTGA<br>AGAGATGACCGTCAGTCATTATTCAAAACTGC<br>AAA | NA                         | NA                          |
| Ca-II-SNP274 | 90.85                  | Ca-desi-LG(Chr)2 | 4055778                 | TGCTTTGCATTTCACTTCAATTTAAATTACAATTAC<br>AATTGCAATTTCTCTCTCATTAGCGCACCTTTTG<br>ATCTATTTAAAGCTTGCTTCGCAACATGA    | A         | G       | CGAAGTGAGAACCAGAGAAGATTCCAGAAGCA<br>AAGCAAAGAAGAGAGAGAAAAACGGTTACGG<br>AGAGAGAATGAAATGAATTGAAACGGTTTTGGG<br>GTT | NA                         | NA                          |
| Ca-II-SNP275 | 91.73                  | Ca-desi-LG(Chr)2 | 4073623                 | CACATTCGTCTTTTTTTTTGTTACCAGAAGGAATT<br>CATTAAATAGTAAGTAGTAAAAATTTGTTGGTATAC<br>ACGTACTTATCATATCACCTTACACTTT    | A         | C       | ATACACAATTTACAAGAAAAATTTATGTCATAGCC<br>TAACTACCTCTTTGAACTAATATCCCACTAT<br>TAATAATCTAATCATAATTATAAGCTTTTCCT      | NA                         | NA                          |
| Ca-II-SNP276 | 92.61                  | Ca-desi-LG(Chr)2 | 4094950                 | TATTAATAATTCTACTTTTTTAACTTTTAAAGAGGT<br>CGCATCTCTACCTACGATTATCTGAAAGATGATT<br>TTGTTTTTATCGTATGAGGTGCGCATCAT    | G         | A       | GTGACCACGGATAATTTTTTTTATTTATAAATTT<br>TAATTTTTTATTTAACACCTCCGAAATGTTAAG<br>ATTAACCTGAAGCTTATAGATGATCGCATTTTC    | NA                         | NA                          |
| Ca-II-SNP277 | 93.49                  | Ca-desi-LG(Chr)2 | 4106081                 | CCATATTCATTTCGAGAAGTGGAAATGTCTTAATGG<br>ATTAAGATTTTGTGATTTTGTGACATAAGTATTT<br>CTAACTCTTGTGTTTGCACATTTATAT      | A         | G       | TTAAATTTAATATTGTTAAAATTAATAAAGATTA<br>ATCTGCGATTCCGCGAACAATTTTCGTAACATTT<br>AAATTAATAGCATATATAAACAGAAAGAATA     | NA                         | NA                          |
| Ca-II-SNP278 | 95.28                  | Ca-desi-LG(Chr)2 | 4120640                 | AATTTTTGTTGTTAATTGTGGCGGTTTGTAAATG<br>TTTTACTTAATTATAAAATTATAAAATGGATAAGG<br>AGCTTCTAGCATATCGATCTTAAATTGTA     | G         | T       | AATAAATAAATAAATAACAGAAGATATCTTTACC<br>CAATATAAGCAGGTTTTGCAATAATTGATTGTA<br>TATAAACATATTAACAATATCTTACTTAATGT     | NA                         | NA                          |

| Marker IDs   | Genetic positions (cM) | Chromosomes               | Physical positions (bp) | Flanking sequences/Forward primers                                                                           | ICC 12968 | ICC4958 | Flanking sequences/Reverse primers                                                                               | Annealing temperature (0C) | Amplified Product size (bp) |
|--------------|------------------------|---------------------------|-------------------------|--------------------------------------------------------------------------------------------------------------|-----------|---------|------------------------------------------------------------------------------------------------------------------|----------------------------|-----------------------------|
| Ca-II-SSR62  | 96.19                  | Ca- <i>desi</i> -LG(Chr)2 | 4129489                 | CGAAACCAAGGTAACGTGAAA                                                                                        | (ATA)5    | (ATA)11 | TGCTATGAGCTATGAATGGGAA                                                                                           | 60.02                      | 181.00                      |
| Ca-II-SNP279 | 97.10                  | Ca- <i>desi</i> -LG(Chr)2 | 4131868                 | G TTCACGCGCTATGTTGTTTTGTGAGATTACGCG<br>GCCTTGTTTAGGTATTTTTTCTTCTCTTTTTGT<br>GGTTGTGTATATTGTTATATTAGATTTAGA   | C         | T       | AAAATCAAACACAAAAGCAAGAGTTTACAATTT<br>GAGAATTCAAACTATATAGTAACAATTCAGTAC<br>ATAAACAGAGTTTCTTCACAAGAACAACACA        | NA                         | NA                          |
| Ca-II-SNP280 | 98.01                  | Ca- <i>desi</i> -LG(Chr)2 | 4139873                 | TTCTTTTAGTGTGTTCCCTTAGTGTGCAAGAGGCT<br>TCCTAACACTTTCTTATTTACTCATAATGTAATTA<br>GTGGTTCCTTTTGAGTTGCAATTAAGT    | T         | G       | GGAACATGGCTATGAACCTCTTCAATATGAAAC<br>CAGGAACCTGCTCTTTCTACTTATTGTTGCAT<br>AAAAGTGACAAGTGCAAAAGCACAAAAGAAAT<br>A   | NA                         | NA                          |
| Ca-II-SNP281 | 98.92                  | Ca- <i>desi</i> -LG(Chr)2 | 4158262                 | GATTATTCAAGACATCCTTCATTGTCAAGTTATCC<br>TTAGTTGGGAGTCGATTGTTCAAGAGACGCCTCA<br>CAAAGAGTGACACTTTCAGAAGAATCATTTT | G         | A       | GTCATGCTTTTAAATAGCAATACTCAGTAAAAT<br>GTGTGTATCACTATTTGGTAGAGGATGATAACA<br>TAGTTGAATCTCCATCGCGTGACTTCTTTTTGA<br>A | NA                         | NA                          |
| Ca-II-SNP282 | 101.65                 | Ca- <i>desi</i> -LG(Chr)2 | 4173568                 | AATTTTCTACATTTTATGATTGAAATTTTACCCC<br>ATATCCCCTGATTATACCTATACCTCAAATATGC<br>AAGAAAATGACGTTTTTGTCCCTCGTTTA    | A         | T       | ACTTGGATTCAAGTTCTCCGTAAGTTTAGAAAA<br>AAAAACTCACTTTTGATTTTCGAAAAGTTGAA<br>AGGAGAAATGGTAATTTTTTGGAGTTTATTAT        | NA                         | NA                          |
| Ca-II-SNP283 | 102.56                 | Ca- <i>desi</i> -LG(Chr)2 | 4221811                 | TCATAACTATTCAATTTCAAACATCACTTATCACTT<br>ATTTTGTCTTCATACTTTCTCAAAGAAAACGACCA<br>TGCACTTTTTGTACCCTTTCTTTTTCC   | T         | A       | GTAGTTATCTCTTGGAGTCTCGAAAAGAAATAA<br>AAAACATTGACATCAAGTTAGCGATGGGAGAG<br>GTTGTGAAATATTTATGTTGTTGTGTGAAATTT<br>T  | NA                         | NA                          |
| Ca-II-SNP284 | 103.47                 | Ca- <i>desi</i> -LG(Chr)2 | 4234380                 | CACTTTAAGTCTTAGGTTAATGTATGTTTAGATTCA<br>TGACTTATGGAGTTGGAACTTGATTTATGTCTC<br>CTTGTAATCATAACATGAATTAATTGTA    | A         | G       | ACCATCAATGGCAAAGAAGTTGTAAAAATAG<br>GAAGAAAGAATTTTTCTGAATGTGCTTGAGTGT<br>TAAAGCACTCAGCAACTTTGATATTATATACA         | NA                         | NA                          |
| Ca-II-SNP285 | 106.20                 | Ca- <i>desi</i> -LG(Chr)2 | 4291559                 | TAGACACACGACGTTCCACTTCTGTTTTCTGTTTT<br>TATCTTGGCTCCTCTTAGTCTCTTGAAAAGCAA<br>GAAACAGCCCACGTTTTCAGCTCTTCCCTC   | C         | T       | TCTGCACAGGTGCTGAATGAGAGATCTGAAA<br>TCAGCTAACAAATATAACAACCATTGAGCTTCG<br>CGTGTGGCGTGAGCAAGAGCACGATACTCCAC<br>TTC  | NA                         | NA                          |

| Marker IDs   | Genetic positions (cM) | Chromosomes      | Physical positions (bp) | Flanking sequences/Forward primers                                                                          | ICC 12968 | ICC4958 | Flanking sequences/Reverse primers                                                                              | Annealing temperature (0C) | Amplified Product size (bp) |
|--------------|------------------------|------------------|-------------------------|-------------------------------------------------------------------------------------------------------------|-----------|---------|-----------------------------------------------------------------------------------------------------------------|----------------------------|-----------------------------|
| Ca-II-SNP286 | 107.11                 | Ca-desi-LG(Chr)2 | 4305455                 | AAAGGAGAATTTCCCTTTTTCCCTCATTTTTATTC<br>TTCCAAGAAAATACTAATTCATTATCTCATTTTT<br>CCCTTCTCCTTCATATAACCAGACTGAA   | G         | A       | ATTTGGGGGACTTCAGTAACTTCTAGTCTTGG<br>AAGATTTGGAGAGAAGAAAAATGGACGATTT<br>GGAAGATAAGGTGAACATGAACAATGGAGTTAT<br>C   | NA                         | NA                          |
| Ca-II-SNP287 | 110.75                 | Ca-desi-LG(Chr)2 | 4444895                 | AACCCATTTTAGGTGAAGTAGTATAAATTTGTGTG<br>TGTCTTTTATATGTTTTATTCTGTACAAAC<br>GTTTCATCCTCATAAAATTTGATTTTCATC     | C         | A       | CGTGTGAAGTAACTGAAATCACTAGAAGAGG<br>GTTGAATAGAGATATTGTAGTTTTAAATTTTCT<br>AGTGAGCTTTTTAAAAATGTGTCTCTACGAGA        | NA                         | NA                          |
| Ca-II-SNP288 | 111.66                 | Ca-desi-LG(Chr)2 | 4468063                 | TTCTTCCCACACAACCACAGATAAGTCCCTAATG<br>CAAACAGAAAGTTTGGAAAGGAGCCCTACCTTAAAC<br>GTTAGCTTCAACGTGTTCTCCGGTACCGC | A         | G       | TCGCGAAGAGTTAGAAGGAAAGTTGCTCACT<br>ACCACGCCACGGTGTAGGTGACCAATTTGGA<br>GGCGACGTTGCGAGCGAATTTTACCGTTTT<br>ACT     | NA                         | NA                          |
| Ca-II-SNP289 | 112.57                 | Ca-desi-LG(Chr)2 | 4492319                 | CTTGAGTTGCAAGCTTTTGTCCAAGTGTATGGTG<br>TCTGCTTGTTCGCCTGAAATGTTTCTCAATCAAAT<br>CATTAGATCAATCAAATACTTCATATGTA  | T         | C       | CTCAAGTTAAACTGTGTGTTTGTCAATTAATC<br>AAAAAGGGGGAGTTTGTAAAGTCATGAGCTTCC<br>CTAATCATGTTTTGATTTAATCCCAAACATAC<br>A  | NA                         | NA                          |
| Ca-II-SNP290 | 113.48                 | Ca-desi-LG(Chr)2 | 4503024                 | TCGTGAAGTGGTATTCACGTGTGAAAGCTTCGAA<br>CTGGTATTTACGATTTTCATACAATTTGATAATAG<br>TCGGTCATATTTACGATTTTGAAAAGTTA  | C         | T       | CATTTCTTATTACTTTCAATTTATGTCAATCAAT<br>TATATGAGTAATATTTACGTTACCAATCCTCCT<br>TTCACCTTCATACACAATTACATCCCTTCGCG     | NA                         | NA                          |
| Ca-II-SNP291 | 114.39                 | Ca-desi-LG(Chr)2 | 4522978                 | TTGAATATTTAACCTTACCCTTGGGGAATTTCTT<br>GCAAGAATAACATTACCCTTAATCCTATTTGGT<br>GTCTCTTGTCTAGTAATACCTCCAGAA      | T         | G       | TTAAATCCATTGGGAATAACCTTGACCCAATT<br>GGGATGGAATAGCCTAAAGATATCAATAATAAG<br>AGGAATGATACATGCGATTTTGTCTCCATACA<br>T  | NA                         | NA                          |
| Ca-II-SNP292 | 115.30                 | Ca-desi-LG(Chr)2 | 4600246                 | TCCAACAAGATATCTAAATATGCGTTTTACTGCTG<br>TTAAATGGGATTCCTTTGGTGCTGATTGAAATCGG<br>GCACATAATCCTACTGCAACACGATATCT | G         | A       | CCATCCACTTCTTTAGAAAAGATGAAAATGGA<br>AAATATGTTTCTGAAAAGAGATATCGAGGAATG<br>ATTGGTTCTCTGCTGTATCTAACTGCTAGTAGA<br>C | NA                         | NA                          |
| Ca-II-SNP293 | 116.21                 | Ca-desi-LG(Chr)2 | 4642315                 | TGAAAATACCTATTTAGTTTTATCATGAGCTATG<br>GGTTCGAATTTAAGCAAAATCTTGAGAACGTTTG<br>CTTCTGAAATTTCTTGTCTTTTCTCAAT    | T         | G       | TTTTTAATTCGTACATAAAGATTCAGGAAATA<br>CAAGCAAATATCGACAAAATCTCAAATGACA<br>TTTTCTTTTACCCTATATTTTCCCTCCTTTT          | NA                         | NA                          |

| Marker IDs   | Genetic positions (cM) | Chromosomes      | Physical positions (bp) | Flanking sequences/Forward primers                                                                           | ICC 12968 | ICC4958 | Flanking sequences/Reverse primers                                                                             | Annealing temperature (0C) | Amplified Product size (bp) |
|--------------|------------------------|------------------|-------------------------|--------------------------------------------------------------------------------------------------------------|-----------|---------|----------------------------------------------------------------------------------------------------------------|----------------------------|-----------------------------|
| Ca-II-SNP294 | 117.12                 | Ca-desi-LG(Chr)2 | 4662459                 | TCTTCTAGTAAATAATTCATATCTTCTTGATGATAAA<br>TCTTGATCACATCTTCTTGTAATAAATCTTATCTT<br>CTTGATGATAAATCTTGATCAAATCTTC | C         | T       | TAATTGAAGAAAATCTTTGACCAAGTTGAAAAG<br>AAGATATGGTCAAGATTTGAAGAAGATATGATC<br>AAGATTTATCACAAATAAGATATGAATTATTACA   | NA                         | NA                          |
| Ca-II-SNP295 | 118.03                 | Ca-desi-LG(Chr)2 | 4699467                 | CTCTCTTATATCCCTTGCCCTTGATACTTCATGGA<br>AATTAATTCTGAAGCAAAGAATTGTTCCAGCCTTA<br>TCACTTTTTCAAAGCGTTTTTCCATCTCA  | A         | G       | CGCTCAAATCGCATAAGTCTTATGATCATAAAG<br>CATGGCATTCTGAGGTCTTTAGAGGTGCTGT<br>CTCGGATGAGATAGTTACAGCTAAAAATTTCT<br>TG | NA                         | NA                          |
| Ca-II-SNP296 | 118.94                 | Ca-desi-LG(Chr)2 | 4713211                 | TAACCATAACATTATTCATTTCTCAGGTTTGATCTT<br>GCTTCTTTCAAATGATCTTGCTTCTGATTTATAGCA<br>TAATGTGATCATTGATTGTTGTATGAAT | C         | G       | AATGAAATAATCTTAAAAGGAATGTATCATATAT<br>TAATCATTCAAGAGAATGATTATTACATCTTCAA<br>GATAACATCTTCATGAAGAAGATGATCAAATA   | NA                         | NA                          |
| Ca-II-SNP297 | 119.85                 | Ca-desi-LG(Chr)2 | 4758614                 | TCGCGTAAACCATTTATCGCGCAACTCAACATCGT<br>TCAAGGTTTTCGTTCAATGTTTGAGGATTCTGTCTC<br>CGGTAACCATTTATTCGACTGTGTTTTT  | A         | G       | GTGGATTATAACACTAATTCGTAGCAAATTA<br>AACTAATAGCAGAGCAAATAGGATTCGAAAAA<br>TTAGGGTTTTAGAGCAAAGATACAAAATACATA<br>C  | NA                         | NA                          |
| Ca-II-SNP298 | 120.76                 | Ca-desi-LG(Chr)2 | 4904211                 | TGAATAGCAGTTATATAATAGTTATATAGTCAATTA<br>CGTAGCAGTTAATGGCTTCTCTTCTGTTTTGTTT<br>AAGTTGTTGATGTGGCTTACATTCAGTT   | A         | T       | AGTTGAGAGAAAACCTCAGAGAGAAAACAATAAT<br>CTTATTCATCTTATTTGAGGCTATTCATCACCA<br>CCATTATATAGGTGCATGAAATAACAAAAATCA   | NA                         | NA                          |
| Ca-II-SNP299 | 121.67                 | Ca-desi-LG(Chr)2 | 5015705                 | ATCCTCTTTATGATGTTTTGCATGACCAGATTGCA<br>TCCACAAATCCATGTTGAATACATTTGGGGACATA<br>ACCTGGTGATTTCAAGCAAGTTGACTAAG  | C         | T       | TGGACTTCATTCGAAATCAATACAGGGATAGGG<br>GCTATCAAGAGGTAAAGTTTCACTATAGAAGTT<br>TCTTGATATTACTAAAAACAATCTTTTTCCAAGT   | NA                         | NA                          |
| Ca-II-SNP300 | 122.58                 | Ca-desi-LG(Chr)2 | 5036904                 | TTTTAAAAAGCGCTGTAATAGGTGCATATATAGC<br>ACGCGTGTATACTAGTTTTACCGCGCTTCTTTCA<br>AAAAACGTTGTAATAAAGGCTTTTTTTTTAT  | G         | A       | TTCAGAACTTCAAAGACTTTAATAGCACATCT<br>CAACCAAAAACCGTAAAATATTAGGTATATGAA<br>TCACCTTTTTTATATATCCAATATTTAATTCATT    | NA                         | NA                          |
| Ca-II-SNP301 | 123.49                 | Ca-desi-LG(Chr)2 | 5097670                 | ATGATGTTGTTGTGATTGTGTTATAAGTGCTAAGT<br>GTTATGTTTTGTTGGAATTGTGTATAGCATGTT<br>TGATTGCAAACTATTTGCAAGCTCATGAT    | A         | G       | TTTCCCTGAATTTTTTCTAAAAATACATAAAT<br>AACTCAATCACATTCACACACAATCCAACACA<br>TAACACTTAGCACTTATAACACAATCACTACAA      | NA                         | NA                          |

| Marker IDs   | Genetic positions (cM) | Chromosomes               | Physical positions (bp) | Flanking sequences/Forward primers                                                                          | ICC 12968 | ICC4958 | Flanking sequences/Reverse primers                                                                             | Annealing temperature (0C) | Amplified Product size (bp) |
|--------------|------------------------|---------------------------|-------------------------|-------------------------------------------------------------------------------------------------------------|-----------|---------|----------------------------------------------------------------------------------------------------------------|----------------------------|-----------------------------|
| Ca-II-SNP302 | 124.40                 | Ca- <i>desi</i> -LG(Chr)2 | 5166682                 | ATGTTTGCTTCTTCTAAAGGATGATGATCATATG<br>GTTGATTCTATTTGATCTACCCTTTATAAGCATTGT<br>TGGATTTTGTCTACATTTAATGAAGGAT  | G         | A       | CACAAGTTATCGGTGATGTTTTGTAAAGCAAAA<br>CAACAAAGGTTAAATGACAACAAGTTGAAGTTC<br>TGCAACATAACATGGATTGGAGGAGACTCAA<br>G | NA                         | NA                          |
| Ca-II-SNP303 | 125.27                 | Ca- <i>desi</i> -LG(Chr)2 | 5229329                 | AGTACTCTTAAAGCTACATAAAAAGGTATGTTTGT<br>TGGTCTGGTTTTGAATCCAATTTTTTCTTCTAA<br>ATCTGGGGATGTTACGTGAACCTCAGTTCA  | C         | T       | AAACAACGTACGTTTACGTTAATTAAGATTGCG<br>TACTTTCTGAAATTTTTATTTTTTAAACATAC<br>GTGAATTCAGTTCACGTAACAACAATGTTAC       | NA                         | NA                          |
| Ca-II-SNP304 | 126.14                 | Ca- <i>desi</i> -LG(Chr)2 | 5240432                 | TTCATTTTAAACACTTAGTGGAAAATCTCACAGTG<br>TGAGGACTAGACGTAACCCACGTTGGGTGAACCA<br>GGATAAATCTTTGTGTGGTATTCTCTTTCT | T         | A       | TTCTGGTTTATGTTATAAAACAGAGAACGTTCT<br>TAAATTAGCAGAAAATCAGTTTCTATTTATCTT<br>AAATGATTAAATGCAGTATAATAAAGAAGGAGA    | NA                         | NA                          |
| Ca-II-SNP305 | 127.01                 | Ca- <i>desi</i> -LG(Chr)2 | 5275879                 | TAGTTTTTGCATTGAAGATCTGGAGGCATTTTA<br>TATGGATGCACGTTACAGTGTTCAAGTACCAAAA<br>AAGTTTGAATATTTGTTTATCAGAAGGA     | G         | A       | TCAACGCATCAGCCACTACATTGGCCTTCCAG<br>GCTGGTACTACAGTGTGAAATCAAATCCTTGA<br>GAGTCTCCATCCATCATCTCTGACGCATGTTCA<br>A | NA                         | NA                          |
| Ca-II-SSR63  | 127.88                 | Ca- <i>desi</i> -LG(Chr)2 | 5381402                 | TTTTCGAAGTATATGTGCACGG                                                                                      | (AG)10    | (AG)9   | TTTCTATGCTCAACCAAAGTAA                                                                                         | 60.02                      | 126.00                      |
| Ca-II-SNP306 | 128.75                 | Ca- <i>desi</i> -LG(Chr)2 | 5398410                 | ATATTTTTAGGGAGACTTAAAGTACTTGTCTTTCT<br>AGTTTGGGCCTTAAAGCCGGCGCCCTGCCTATCT<br>TCTGTCAACCTATTCTACATGTGAGGGACT | A         | C       | ACCTCCCTTAAAGCTAGCTATTAAGGGGAA<br>GAACCGAGTGTCCCATACTGCTCTCAATGTGG<br>GAGTTAGGCACCCATAATAACCAAGCCCTAT<br>CA    | NA                         | NA                          |
| Ca-II-SNP307 | 130.49                 | Ca- <i>desi</i> -LG(Chr)2 | 5472382                 | TTTTGCCATCTTCTCGGCGTGAGACTCGCGAAT<br>ATATATCATTGTAGGTGTGCGTCTGGCAAGGAATA<br>ACACTAATTAGAAGCAATGTATTAAGATGAA | G         | T       | TGAGTTTGTTCGTTGATGTTTTTCTTAGTTATT<br>TATCTTTAGTAATTTTGTAAATATTGGAGGATTG<br>CTAATCCTCACAACTCTTTGTAATTATCAT      | NA                         | NA                          |
| Ca-II-SNP308 | 131.36                 | Ca- <i>desi</i> -LG(Chr)2 | 5495838                 | TTACGACTTCACTCCAGTCACTAGCCCTACCTTCG<br>GCATCCCCCTCCTTGGGTTAAGGTAACGACTTG<br>GGCATGGCCAGTCCCATAGTGTGACGGGCG  | A         | G       | CCTGTCTCAGTTCGGATTGTAGGCTGCAACT<br>CGCTACATGAAGCCGGAATCGCTGGTCAGCC<br>ATACGGCGGTGAATTCGTTCCAGGCCCTTGA<br>CACA  | NA                         | NA                          |

| Marker IDs   | Genetic positions (cM) | Chromosomes               | Physical positions (bp) | Flanking sequences/Forward primers                                                                            | ICC 12968 | ICC4958 | Flanking sequences/Reverse primers                                                                                                                                                                                                                                                         | Annealing temperature (0C) | Amplified Product size (bp) |
|--------------|------------------------|---------------------------|-------------------------|---------------------------------------------------------------------------------------------------------------|-----------|---------|--------------------------------------------------------------------------------------------------------------------------------------------------------------------------------------------------------------------------------------------------------------------------------------------|----------------------------|-----------------------------|
| Ca-II-SNP309 | 132.23                 | Ca- <i>desi</i> -LG(Chr)2 | 5510517                 | TTCCACCGCCCTATGTCTCAAAGCCTCCAAAAT<br>ACACCTCCGGATTAGCCAATGTGGATGTGTTTTT<br>GTCAATATACACCTTCGGATTGGCCAATCC     | G         | A       | GGACTTCATTACTCTTATTAATTTTAGGAGCTT<br>AGATTTAAGTATTTTACTATTGCTAAATTGTTTT<br>GAGAGTTTCTTCTCCACCCCAATGCTCTC                                                                                                                                                                                   | NA                         | NA                          |
| Ca-II-SNP310 | 133.97                 | Ca- <i>desi</i> -LG(Chr)2 | 5547268                 | CTCAACCTGTAGTTCAGGAGAAGTTCCTCATCTTG<br>AAGAGCCCTAGTTGCTACCAAAACAACAGTTTTCA<br>GAGTAGGAACATGTGATTCACTATTTCTTG  | G         | A       | GATTGAAAACAACATGAGAGCTTACATTCCTAA<br>TATATTATATGGAATGCAGAAGTAAATATGAA<br>GAAATTTGGCAGTTTTTGGTTCAAATCTAGAGT<br>T                                                                                                                                                                            | NA                         | NA                          |
| Ca-II-SNP311 | 134.84                 | Ca- <i>desi</i> -LG(Chr)2 | 5561407                 | TATATTATGATGTGACAGCCTTTAAAATTCGTCAT<br>GTTGCCACTCTTCTCTAAGACTACATTACATTCAT<br>TCTTCCATTAACCTATATTTCCCTTTTTATT | A         | C       | ATAAATGGGAGTTACCAATTTATTATATGATAT<br>AATTATGTAATAATGAGTTGGGAGAGAGTTGGT<br>TTTGGTTATAAAATGGTGCAAGAACAAATAAA                                                                                                                                                                                 | NA                         | NA                          |
| Ca-II-SNP312 | 136.58                 | Ca- <i>desi</i> -LG(Chr)2 | 5581383                 | CTTAGCGTAGTGTCTAGCTTTATAATTTAAAGA<br>AATCAAGATTCCTTAACCTTGAATTTCTCTATCTTT<br>AGTGACTTTGTTCTGTCTTCCACTTAAC     | C         | T       | AATCACTTAATTTTAGTATTTGGTAACTTTAGTA<br>TATTTTAGAGAGAAATTTATTGATTAATTAATTT<br>AATAAAATTTATTAGATGAGAGGAAATTTT                                                                                                                                                                                 | NA                         | NA                          |
| Ca-II-SNP313 | 138.32                 | Ca- <i>desi</i> -LG(Chr)2 | 5602332                 | AGTTGTTTAGTGAATCAATGCTAGTACATCTTATC<br>TTTTTTTTATAAAATTTAATGTAGCATTTATGAGT<br>TTAACTTTTATATACTTTCAGTGTAAATC   | A         | G       | GGTTAATTACAACATTTGGTCATATGAAATATTT<br>GACTTTTTATTTGATCATCTCTAAAGTCACAAAT<br>ATGATTAGTTGTAATAGACCGATAGTGTATAA                                                                                                                                                                               | NA                         | NA                          |
| Ca-II-SNP314 | 139.19                 | Ca- <i>desi</i> -LG(Chr)2 | 5616669                 | TTGCTCATTTTGTAGGGATATTTTTTAAATTATAT<br>TCTTTTTCAAATCTTTTCCATATATTTATTTTGA<br>ATTTTTTATATGTTATATTTTTTTTTA      | C         | G       | TATTTTTATTTAATATATTTTTCTATTTAATTTT<br>TTATTTAATATTTTAGTTTTTTAATTATTTTTT<br>ATATTTTATTTATTTACAAACTTTTAAAG                                                                                                                                                                                   | NA                         | NA                          |
| Ca-II-SNP315 | 140.06                 | Ca- <i>desi</i> -LG(Chr)2 | 5627315                 | AATTTTCCAATCGATTGTGCTGATCAAAGTGACTC<br>AGACATTTACGTCGAATCGATTTGCCAATCGATTGT<br>GCTTGTTACAGAACCTCAGCTATTTTGTCA | G         | A       | AGATTTCTTAAACTACAAGTTTGTGGCAATCGA<br>TTAGGCAATCGATTGCAGTTAATCATTATCAG<br>AACCCTTTGAATAAATCGATTGGCACATTGAT<br>T                                                                                                                                                                             | NA                         | NA                          |
| Ca-II-SNP316 | 140.93                 | Ca- <i>desi</i> -LG(Chr)2 | 5645696                 | TATATTATGATGTGACAGCCTTTAAAATTCGTCAT<br>GTTGCCACTCTTCTCTAAGACTACATTACATTCAT<br>TCTTCCATTAACCTATATTTCCCTTTTTATT | A         | C       | CTTCCAAGTTCCTTATATAAACAACATCTATTCC<br>AAAGTTTGAACACTTCAACTCGGGAATTTCTCT<br>TGGTGAAGCTAAGCTTTTGAACCATGGCTCT<br>AACTACCAACCTTTCATCCCTCCTTTGTGTTTC<br>CCTCATCGCCATTGCTCTACTTTGCTGATTC<br>ACAATCCTTCATCGGAGTAACTACGGCCAAGT<br>CGCCGACAACCTTCGGTCAACCGACGCCACGG<br>CCCCCTACTTAAATCCACCACTTCCCAA | NA                         | NA                          |

| Marker IDs   | Genetic positions (cM) | Chromosomes      | Physical positions (bp) | Flanking sequences/Forward primers                                                                           | ICC 12968 | ICC4958 | Flanking sequences/Reverse primers                                                                               | Annealing temperature (0C) | Amplified Product size (bp) |
|--------------|------------------------|------------------|-------------------------|--------------------------------------------------------------------------------------------------------------|-----------|---------|------------------------------------------------------------------------------------------------------------------|----------------------------|-----------------------------|
| Ca-II-SNP317 | 141.80                 | Ca-desi-LG(Chr)2 | 5657560                 | TTTACACACACCTATCTATGGGGCCGTTTAATTCC<br>AATCACGATAACACAAACTCAGGCTGCTTGAATCA<br>ACATATCTTGACTTGATTGAACTAGCCGCT | T         | A       | GGTTGTCTTTTGGACTTGATGGTGCAAAAGATG<br>TTGCAATGAAACTGGCTGTCAGATCCGATGATG<br>AAACTGTCAGCGATGCCATCCATGAGATTGTAG<br>C | NA                         | NA                          |
| Ca-II-SNP318 | 142.67                 | Ca-desi-LG(Chr)2 | 5685363                 | TTTCTTTATAGTTTGTTAAAGATTGCTTCCTATCAA<br>GGTTAGATAGGTGTTGTAATTGCTTTCTGGGTGG<br>AAAGTAATTAAGAAAGAAATAGATCAAGGT | C         | T       | TCACCAACGTGGGTTACGTCCAGTCCTCACA<br>CTGTGAGATTTTCCACTAAGTGTTTAAATGAA<br>GAGCCTTCTTAATCTTACAACACCTAGAATAGA<br>TC   | NA                         | NA                          |
| Ca-II-SNP319 | 144.41                 | Ca-desi-LG(Chr)2 | 5717662                 | TATATTGGTATCTTTTTGCGTTAAAATTTTATGTAA<br>TATTTTGTTGTTTCAGACAAAGGGATGAAGAGTTG<br>GATGCTGTTATGCTTTCTGCTCAGGCACT | A         | G       | CAGATACAAAGAGTGCTAGTAGTGATGCTGTCT<br>GCAATTTATCAACTTCACCCCGACTCCAGGGCG<br>TGTTCAAACCATTTAATTGCTTCAAATTAGAGAC     | NA                         | NA                          |
| Ca-II-SNP320 | 145.28                 | Ca-desi-LG(Chr)2 | 5753868                 | TAATTTTCTTTCCCTTCTTTTCTTTCTTTGTTTT<br>CCTTCCCTTTCTATTTCCCTTTCTTTATATAACC<br>TTTTCTTTTCTTTTCCCTTCTCTAA        | A         | T       | TATTTTGACACAGTTTAGAATTACTCGTCGATAA<br>ATAAATTTAAATTAAGTGCGGTAATCCATTACG<br>GAGAATTTAATGCGTTACGGGTGAATGGTAA       | NA                         | NA                          |
| Ca-II-SNP321 | 147.02                 | Ca-desi-LG(Chr)2 | 5783837                 | TGTACTTACATATCTAATATATTGTTTTGGGAT<br>ATTTGTCCTTTGATGGAGTGCCTTGCTAGTTTTGG<br>ATTTTTTGTTGCTGTTTCAGCAAGATT      | C         | G       | AACAGAACAAAAAATGACAAACCACTTAT<br>CCTTAATCCACATCCTCGGTGAGGAAAAAG<br>GTACACTCTAGAATCTTGATGCTTCAACACTC<br>TA        | NA                         | NA                          |
| Ca-II-SNP322 | 147.89                 | Ca-desi-LG(Chr)2 | 5834516                 | TATGGTAGCATCTTCAAGCACAAAGCTCTCATGGA<br>ATAACTTGAGGTGTTGTCCATTTACTTTGAACACT<br>TTATCGGTGTTTCACTTTTTATTCCACT   | G         | A       | AAAGTTTACTGTCAACTCCCGTCTAAAAATTA<br>TGGATGGGAAACCTTGATCCAAGTGATTGGC<br>CCTTTTGCTGTTACTAACACTTTTACTCATGGT<br>G    | NA                         | NA                          |
| Ca-II-SNP323 | 148.76                 | Ca-desi-LG(Chr)2 | 5857541                 | TTCAGTAAGAGTTCTATTTCTTTTTCAGCTTTACC<br>ATTCATTTCAGGTGAATATGGTGCAGTTGTTTCAT<br>GTACAATTCCTTGGGTTTTATAAACTCA   | A         | T       | CATGTTCAAATATTTGTGACTGAAATAGAAAAT<br>CAATTTAACAAAAGATTAGAGGTTTTCGTAGT<br>GATAGAGGAACAGAGTATGATTCAAACCTTTTA       | NA                         | NA                          |
| Ca-II-SNP324 | 149.63                 | Ca-desi-LG(Chr)2 | 5874928                 | AAACTGTCTTGGGCAAGGCCTTGGTAAAAATGT<br>CAGCCAAGTATCAGTTGTATTGACATATCCAGC<br>CTAATCTTGCCTGTTGGTATTGGTCTCTAA     | G         | T       | TACAGTGCCCATATGTGTGATAATACTAGTGC<br>TATTAATATCACTAAGAACCCTGTCATGCATTCT<br>AGGACTAAGCACATAGAGATTAGGCATCACTTC      | NA                         | NA                          |



| Marker IDs   | Genetic positions (cM) | Chromosomes      | Physical positions (bp) | Flanking sequences/Forward primers                                                                            | ICC 12968 | ICC4958   | Flanking sequences/Reverse primers                                                                                                                                                                                                                                                              | Annealing temperature (0C) | Amplified Product size (bp) |
|--------------|------------------------|------------------|-------------------------|---------------------------------------------------------------------------------------------------------------|-----------|-----------|-------------------------------------------------------------------------------------------------------------------------------------------------------------------------------------------------------------------------------------------------------------------------------------------------|----------------------------|-----------------------------|
| Ca-II-SNP325 | 150.50                 | Ca-desi-LG(Chr)2 | 5898120                 | ACCTCAGAAGGC AAAATGGCTGATCAATGCATG<br>GACTACCCAATAACATTGCAAGTGCTCTTTCCAAA<br>GATGTTGTACTTTGTCCATTGAAGGTCTAT   | T         | C         | AGCTGCAATTTTGGATCCAACCTTTGAGCCACC<br>TCATGATGTTGAAGCATTGAAAAGGATAGCTAA<br>TGTAGCTTGTAAATGTGTGAGAATGAGAGGGA<br>AA                                                                                                                                                                                | NA                         | NA                          |
| Ca-II-SNP326 | 151.37                 | Ca-desi-LG(Chr)2 | 5914388                 | TGCCCCACAATCATTGGCAGCACCATCCTCTTCT<br>CTTCTCTTCTCTTCTCTTCTCTTCTCCCGAA<br>TCCTATCAATGAAGTCAGTCTAGAAATTA        | G         | A         | TACATACCCAAAAAACAACCCCTTGTCTAAA<br>ACCAAGGAAAATGAAAGAAAAAACAACAAT<br>ACTTCTGTTTATAGTGGTAGTGTGACCCCTATT<br>CCTGACCATTAGTATCACATTACATTAATGTAAA<br>ACCAAGTGATAATCTAACCTGACTTAGATTAC<br>CATGTTGAGTAGATCTAAGTTGTTGAATAGAGA<br>TTGAATGACTCATCTCATCTCAAAGTGCCCAAT<br>TTTTATCATCCCTTCACATAATTCACTCAATAC | NA                         | NA                          |
| Ca-II-SNP327 | 152.24                 | Ca-desi-LG(Chr)2 | 5923861                 | TGTAGGAGCATATCCGCTCTTGTGTACTCTTTCT<br>TTGGAGTAATCTCTCTCTATTATTCTTATCATTTT<br>TCTAAATATTAGTGCCCTTCTCTAAATC     | C         | T         | ACTTCTTGGCCCAACCTTACATTTCCATGA<br>AAATTGGCACTCCCTCGAGATCCGGCAGGTGCG<br>AACCAATTGTTAGGAACCAATAATTTGATTCC<br>AA                                                                                                                                                                                   | NA                         | NA                          |
| Ca-II-SNP328 | 153.11                 | Ca-desi-LG(Chr)2 | 5933735                 | CTGGGAGTGATAAAATGATGATGCTTCTGCTCTC<br>TCCTTGTGGCACCACAATTTGAAGTTGCTCCTTGT<br>CACTCTTGGTGAATGGTCCAGATACTA      | T         | C         | TACTACTGTACCATACATAAGCTAAGATTGAAA<br>AACTATGAAGCTTAATAAGAAATAGGAATAATA<br>AGTAAAATTGAAGATTAGGCCTTTTACCTTGGT                                                                                                                                                                                     | NA                         | NA                          |
| Ca-II-SNP329 | 153.98                 | Ca-desi-LG(Chr)2 | 5957298                 | AGTTGTAGGCAATTATACTGCTACAACCTCAACTAC<br>CTAGCAGTTTGGAGTCTGACACTAGAGCTATTATT<br>CCTGCTAAGGTTTTTGTCTAGGAGGGATAA | C         | G         | ATTGACTCTTCAGCAGAGTTCCCTTTTCCAGG<br>TAGCATCTCCAACATCCATGCCTTCCATTGAA<br>TCAACCATCTCGCTTATGCTGCCACCATCCA<br>A                                                                                                                                                                                    | NA                         | NA                          |
| Ca-II-SNP330 | 154.85                 | Ca-desi-LG(Chr)2 | 6012474                 | TGTAACCACCACCACACTCAATATCCTGCTCAAAT<br>TTAATAGAATACTGAACCACCAGGGTCTGTTCTT<br>ATTGGTCAACTCTGGTATCTTTGCAGATAT   | G         | T         | GTAATTAGTGATTTTAGTTATGGTGTTATAGGC<br>TTGATTATCACTAGTGTCTACAATCTTGCAG<br>GTATTGAGACATATAATGATGCCAAGCATTTTT<br>C                                                                                                                                                                                  | NA                         | NA                          |
| Ca-II-SNP331 | 155.72                 | Ca-desi-LG(Chr)2 | 6034855                 | AAAATTTGAAATAATTTTGATAACAATTAATTGTTT<br>TAAGGCTTAATTTAGTTTTGGTCCCCTATTTTA<br>GTTGAATCGGAAAGTAGTCCCTCCATTT     | G         | T         | AAATCTATGATCATAAATGGTGTAGTACGATTTT<br>AAAAATAAAATTTTCACTCAAATTTTGGATCAAAA<br>TTCTGTTTGGGGACCAAACTGGGGAGAAAC                                                                                                                                                                                     | NA                         | NA                          |
| Ca-II-SSR64  | 156.59                 | Ca-desi-LG(Chr)2 | 6056181                 | AATCAGAAGATGCCCCACAA                                                                                          | (TCCTCT)9 | (TCCTCT)6 | GCATTGAGAATGCTCTAGTGGAA                                                                                                                                                                                                                                                                         | 60.46                      | 118.00                      |

| Marker IDs   | Genetic positions (cM) | Chromosomes      | Physical positions (bp) | Flanking sequences/Forward primers                                                                           | ICC 12968 | ICC4958 | Flanking sequences/Reverse primers                                                                                | Annealing temperature (0C) | Amplified Product size (bp) |
|--------------|------------------------|------------------|-------------------------|--------------------------------------------------------------------------------------------------------------|-----------|---------|-------------------------------------------------------------------------------------------------------------------|----------------------------|-----------------------------|
| Ca-II-SNP332 | 157.46                 | Ca-desi-LG(Chr)2 | 6056256                 | TGCCCCACAATCATTGGCAGCACCCTCTTCTCCTTCTCCTCTTCTCCTCTTCTCCCGAA<br>TCCTATCAATGAAGTCAGTCTAGAAATTA                 | C         | T       | CTTAAATTGAATTCAGTCTGCTTGGGGATACAA<br>TTGTTTTACTTTTCGTTTCATGTGAGATATGAT<br>GTCAGTTGCATTGAGAATGCTCTAGTGGAAAT        | NA                         | NA                          |
| Ca-II-SNP333 | 158.34                 | Ca-desi-LG(Chr)2 | 6067444                 | ATCATTGATGAATGACTTATGCTTTCAGTGGCT<br>AATATCTGATTGTATAAATAGATACCTTCCATCTC<br>ATCACACGCCTTTGGGACACATATCTGGC    | T         | C       | AAATATATTATTTAGTGAAGAGGCCAGAGTAA<br>GCTAGCTCACCGTTAGAAGGAACTGGCAAT<br>ATATACACTAAGAAGTCTGGTAAGGCATCTCCT<br>TC     | NA                         | NA                          |
| Ca-II-SNP334 | 160.10                 | Ca-desi-LG(Chr)2 | 6105613                 | ACATACTTTTTCGAATTCATTTCCCTTTATCTGTTA<br>TTAATTTGCAAGAGTGCATTGATGTGCAGCCTACT<br>TTGCATATCCCATAAATTAGACAAGCGTT | A         | G       | TTTTACCAACCATGATCTTATAATTCATAATAA<br>AATTCGAGTCACAATTCATAAGAAAACCTGTTCC<br>AATTCCTTAGTTTTGAATCACAAATTCGTAACAT     | NA                         | NA                          |
| Ca-II-SNP335 | 160.98                 | Ca-desi-LG(Chr)2 | 6133438                 | GGCTTTGGAACGTCGTTTAGCTTCAACTTCTCGAA<br>ATCCTGAGACTCCTCATGAAGCTTGGTTCCAAGG<br>AGAGTATAAAGACCAACTGAAATCAGCTATT | G         | T       | GATTTCTCTGGTAAGAAGCCAAGGATGCAGC<br>AATACCATCAAAAGGCCCGCCATACATCCCTAG<br>AGCTGAAGAAGATGGTGGAGGAGTCTTGAAG<br>ATA    | NA                         | NA                          |
| Ca-II-SNP336 | 162.74                 | Ca-desi-LG(Chr)2 | 6220860                 | AGTGTTTAAAATCTGGCGCGGAACCCGAATCAAA<br>GTTATAAATTTAGGGAAGAATGCTATTATGGTCT<br>CGCGGTCTCGATTTCATTTGGTCTTTTCGG   | A         | G       | ATAACTATGTTTCATGTTTCGCGCCAGATTTCA<br>AACACTAGCCATCGTTTGGTCCAAAAATACAGA<br>TGTTGGTCCATGTTTGTGCGAGGGGTACGAAAA<br>CG | NA                         | NA                          |
| Ca-II-SNP337 | 163.62                 | Ca-desi-LG(Chr)2 | 6246652                 | GTCCATATGTTGTGTTTTAGTGTATTTCAAAGT<br>GTCTTGTCTATAAGTCCCACAAATCATATATCGCT<br>CATGAGAACAAGGACGAAGCTCTAGCTTC    | T         | G       | AATGACAAATATTTTGAACAGTTTGTTTTTTCT<br>TTTTAATTGATATTTATTCTGAGATAGAGGAAAT<br>GTCAACGGTGGTAGATGTCACATAATTAACACT      | NA                         | NA                          |
| Ca-II-SNP338 | 165.38                 | Ca-desi-LG(Chr)2 | 6328392                 | CCTTTCTTTCACGGAAGGAAGAACCTCCCTGTTT<br>TCTGTAAGATAGCACTGTTAGACTCTAGCTATCTT<br>CACTATGAGAACACGGTCATCGGGACTGTC  | C         | T       | ACTTGGACTTTTAGCCGTGTTGGCAAGGTA<br>TCGTTAAGACTTACGTTGTAATTTAGGAAGATA<br>GTGAGAAGTACGCTTCTGCATGTAGTGAAGT<br>CA      | NA                         | NA                          |
| Ca-II-SNP339 | 166.26                 | Ca-desi-LG(Chr)2 | 6414438                 | CAATACAACCTTTTAGAACCAAGAGCGGCTTTAT<br>CTCATTGATAGCCCTCCTCCTAAGGGTGGCCT<br>TTCCCTTAGGGGCGGCTCCATCTAACGGATG    | A         | G       | CCTTACGAGAGAGGTCATCCGTAGGAGGAGAG<br>GGCTATCAACGAGATGTAAGCTCCCTAATTGAT<br>ATGTGCTGTTGCGTTGCGGAATTGAGGGGAGA<br>GGG  | NA                         | NA                          |

| Marker IDs   | Genetic positions (cM) | Chromosomes      | Physical positions (bp) | Flanking sequences/Forward primers                                                                           | ICC 12968 | ICC4958 | Flanking sequences/Reverse primers                                                                                | Annealing temperature (0C) | Amplified Product size (bp) |
|--------------|------------------------|------------------|-------------------------|--------------------------------------------------------------------------------------------------------------|-----------|---------|-------------------------------------------------------------------------------------------------------------------|----------------------------|-----------------------------|
| Ca-II-SNP340 | 168.02                 | Ca-desi-LG(Chr)2 | 6423896                 | TTGTTTCATAGCCTTAGTGTATAACACTCAATCCTTT<br>TACCCTTATCTTATATTTGTGTTATGCTTTTTAAAT<br>AATCAATAGTAAATCTTTTTGTTGTTT | T         | C       | TTTATCTTAAAACCATTGAAAAATTGAAAGTGG<br>GACAATGACATCAAACAATTATAAGATATATATT<br>TTTTAAAGGAATTATAAAATATATTGAAGAGAA      | NA                         | NA                          |
| Ca-II-SNP341 | 168.90                 | Ca-desi-LG(Chr)2 | 6434776                 | GTTGGACTGACATTAATTGGTTTTGTCCATTAAA<br>GACTAGCATTGGCTACTATGTAGGATTGCAATCGT<br>TAGGAACAAGAGAATCATCCTTAATTGGTT  | C         | T       | TAATTTTGATCCTTTAGTAAGAAATGTTTCATCT<br>TGAATGCTTCTGGTGTGGATTATCACTTTGCAT<br>CACTATTCTGCTACTGCTACCAATCTTTATGGA      | NA                         | NA                          |
| Ca-II-SNP342 | 169.78                 | Ca-desi-LG(Chr)2 | 6445277                 | TGTGGTAGCCGATCTTCAAATTTATCAAACGTGGT<br>ATTTCCCTTTGTAGGAATCATTCCAAATTTATCAA<br>CTATTGACTTGTAGATATGATTCCCTCAA  | G         | A       | GGAGTGGTTGGACCTATCAAGGAACCAAGTTGA<br>CAGGAGAGATTCCCTCGGCTTTGACAAATTTGA<br>ATTTCTTGTCTTTCTTGAACCTTTCACAAAACCA<br>G | NA                         | NA                          |
| Ca-II-SNP343 | 170.66                 | Ca-desi-LG(Chr)2 | 6455481                 | ATAATCATTATTTTTATTTTTACTTTTTATCT<br>TGAGTACTATAATTTCTATATTCTTTTTACTTAAA<br>CTAATATTTCTATATTTTATGTTTC         | A         | G       | CCAAAAAGATAATTAATCAAATATTTGTGAA<br>AAAAACTGGTGGCATAATATCTCTAATAAGAA<br>TTAGTTATCGGAAGTTAAGTGAAATGAAACA            | NA                         | NA                          |
| Ca-II-SNP344 | 171.54                 | Ca-desi-LG(Chr)2 | 6478674                 | CATCGATTCAAATAACATGTGCAATTACTTTGT<br>CGGTTTCTGTTCACTAAGCAGGAGTTTGGGTTAG<br>CATTACTCATGAATTTTATAATCTCAACA     | G         | C       | GTCAAATTTAAGGATGTTTGCATACGAGAATTA<br>AGAATGTAGCTTTTGAACAGAGATACTTCAAT<br>GGTCAATTCACCGAAGTACGGCTACAAAGAAA<br>A    | NA                         | NA                          |
| Ca-II-SNP345 | 175.94                 | Ca-desi-LG(Chr)2 | 6488476                 | CTATCTGAACAATGGATTTTGCACCAAAAAACCT<br>GTTGAGAAATCAAATATCTCTTGTGTGTAAGG<br>GTTGGATCCTGTAGGCACTTTTCGTTTTGC     | T         | A       | GGATCAAATTTCTCAAGTCTTCTACTTCAAATC<br>ATCACCAAAAATTTTCATATTCCATTTGTTAATTC<br>TCCGGTAAGAAGCAACGGTAGAGAATTCAAATC     | NA                         | NA                          |
| Ca-II-SNP346 | 176.82                 | Ca-desi-LG(Chr)2 | 6501665                 | AACATTAATGACTCTTCAACAGGGTTAATGTTCC<br>ATTCCCTTGTGATTGCCTCAATGGAGATTTCTTG<br>CTTACACTTTTCAGCATAAGCTTCAGTTGA   | C         | G       | TTCAGGAAGATTACTTGGTGAATAAACATTGAC<br>TCTCTATCCATTCCCTCAGTGGTCAAATGCT<br>AAAAATAAAATCAGCAATTGAGCCATAAGTTTC<br>A    | NA                         | NA                          |
| Ca-II-SNP347 | 177.70                 | Ca-desi-LG(Chr)2 | 6513092                 | TTTGTATGTAACGTCATATTCTTATTCATAAGAATT<br>CTTCTCTCATCTCTACTACCGATTTTTTAAAT<br>TCTTTTTGCTAATGGTGATGTTTAAATC     | C         | T       | CAACTGCAACCACAATTTAAATCATAGACCTC<br>ACCCTCTATAAATCTTAACTTTTTAAATGTTT<br>AATCATTATCCTCAATAGTTGAATCTATATAT          | NA                         | NA                          |

| Marker IDs   | Genetic positions (cM) | Chromosomes      | Physical positions (bp) | Flanking sequences/Forward primers                                                                            | ICC 12968 | ICC4958 | Flanking sequences/Reverse primers                                                                             | Annealing temperature (0C) | Amplified Product size (bp) |
|--------------|------------------------|------------------|-------------------------|---------------------------------------------------------------------------------------------------------------|-----------|---------|----------------------------------------------------------------------------------------------------------------|----------------------------|-----------------------------|
| Ca-II-SNP348 | 178.58                 | Ca-desi-LG(Chr)2 | 6524433                 | GAGCTTCATTTGGAAGATGTGAATATGTCTTCCAT<br>AAGAGAGAGTTCTTTGTTGCTTCTAAAGAACTTGT<br>CGTCCTCTTTGGTCTCTCTTAATCTAGCAT  | T         | C       | TTGACCGCCAAGTTTATTATCATAAGATGATGA<br>CAAATCTAGTAATTTTAGATTAGGTAAGAGAA<br>GAGATCACTAGACAAATTTCTTGCAACTCAGT<br>G | NA                         | NA                          |
| Ca-II-SNP349 | 179.46                 | Ca-desi-LG(Chr)2 | 6539044                 | TAACCCITTCATTTTCTTTTCTTCAAATTATG<br>TGTTCCAAGTGTGCTTTTCCATTCCAGCTGTGTG<br>ATACTATTCTAGTGCAACCCACCACCACA       | G         | A       | AAATTGGTGCCAAATGTGTACCGTATTCGCC<br>GGAGTTTGGCAGCGCAAAATACAAAAA<br>TGTCTATTGTGTTTGTGCGAGGATTGCGCGACG<br>GT      | NA                         | NA                          |
| Ca-II-SNP350 | 181.22                 | Ca-desi-LG(Chr)2 | 6625748                 | ATGATTTATGATTGGCTATTAGGGGTCATTTGATC<br>CATGCCAGTAGGAAAAGGCATTGGTTATTGTAAT<br>TTATTACTCGAGTAGTGCTAGCAACTCT     | T         | C       | TACATGTGGATCCACCACCTTTATATGAGACTC<br>ATTTCCCAAATGGTGGGACCTACATGATTTCA<br>TCCAATAAAGAATGAATGTTGAAAGAGAGAC<br>A  | NA                         | NA                          |
| Ca-II-SNP351 | 182.10                 | Ca-desi-LG(Chr)2 | 6765331                 | TCTCCAGAAAGTTCAAATGTCAAACCAGATTGA<br>TAATCAATCTTCGTTTCTGCCGAATTCAGTTTTGA<br>TCTCCTTACTTCTGCAGAGAATTATAATC     | A         | G       | GTTTGCCTTCGAGTTTAAAAAGCTTTGAAGCTT<br>CTCATTTAATCATTGATGATACAACCTTGTCTG<br>GAGCCTTGAATATGTCCAAAACAGTTTGAAGAA    | NA                         | NA                          |
| Ca-II-SNP352 | 183.05                 | Ca-desi-LG(Chr)2 | 6775211                 | CCAATCGATTGTGTTTAAAGACAGTGACTTAGCTAT<br>TTTCAAGTTAATCGAAGTGCCAAATCGATTGGTAG<br>TATTTGCCTGAAAAGTTCTTACCAGATGTT | T         | C       | ATAACTTGACCTGTGACAAACACAATCGATTGG<br>ACAATCTATTGTGAAAATTTCAATCATGTTAAGT<br>TTGGTTTTAATCGATTGGGAAATCGATTGAACT   | NA                         | NA                          |
| Ca-II-SNP353 | 184.00                 | Ca-desi-LG(Chr)2 | 6797334                 | TGCGTTTGAATTACAATATGAAGGATCTCCTGTAT<br>ACACTAAGGCTTTGTTGGCAAGGCCGAAGCTGCT<br>AGCTTATAGTGATAAGCTCGTATAATCAAAA  | G         | A       | AAAAAGCTAAAAATAATTTATAAGCTCAAACGC<br>TACTTGAGGTAGCATATCAAAAAACACTAAG<br>CTCGTGAGAGAAAACCGTTACCAAAACTCTA        | NA                         | NA                          |
| Ca-II-SNP354 | 185.90                 | Ca-desi-LG(Chr)2 | 6847648                 | TTTTATCCTGGTTCAACCAACGTGGGTTACGTCCA<br>GTCCTCACACTGTGAGATTTCCACTATGTGTTTA<br>AAAACAAAGAACCTTCTTGATCTTACAACA   | C         | T       | TGTTTAAAGATTATTTCTATCAAGGTTAGATAGG<br>TGTTGTTATTGCTTTCTAGGTGGAAAGTAATAG<br>AGATTGAAATAGATCAAGGTTGATCTAGACTAG   | NA                         | NA                          |
| Ca-II-SNP355 | 186.85                 | Ca-desi-LG(Chr)2 | 6862520                 | GTGTTCTTCTTACTTATATTACTATTAACATGAT<br>TTCAAAACCTCACCTCCTCGTTGTTTGTGTTTGAC<br>TGGCTTGACCCTTCATTTGCGAAATCGCA    | A         | G       | AGTAAAAGTAAAAACAATTTACAATTTCTTATTC<br>CCGGTATCACCTATCAGAGCGGTGTTTCTCCC<br>AAGTTGAACTTCAAGACTAATTAACCTGTAATAA   | NA                         | NA                          |

| Marker IDs   | Genetic positions (cM) | Chromosomes               | Physical positions (bp) | Flanking sequences/Forward primers                                                                           | ICC 12968 | ICC4958 | Flanking sequences/Reverse primers                                                                               | Annealing temperature (0C) | Amplified Product size (bp) |
|--------------|------------------------|---------------------------|-------------------------|--------------------------------------------------------------------------------------------------------------|-----------|---------|------------------------------------------------------------------------------------------------------------------|----------------------------|-----------------------------|
| Ca-II-SNP356 | 187.80                 | Ca- <i>desi</i> -LG(Chr)2 | 6904261                 | AAGGAATGCCCCATCTGTTTGTCTGAGAGGCTC<br>ACCACAAAACCAGAATACCGAGGTTCCACTTTGG<br>GGTCATGATGGTCCGGTACTTCACTTGCTTT   | C         | A       | CCCAGTCACTATGCCTCAGCACCACCACATACATT<br>TCATCGAGTGTGATCCACACACGAAACAGTC<br>GTATCCCAAGAGCCACTGTAATCCTCGTCAAA<br>TC | NA                         | NA                          |
| Ca-II-SNP357 | 188.75                 | Ca- <i>desi</i> -LG(Chr)2 | 6923340                 | GTTGTTTGTAGTTTGTATGTCAACTATAAGTTCTC<br>CCTCCGTTTCATATTGAATTATCTTTAAGGTTA<br>TGCACACTTCTTAAGAAAATCATCGAGTG    | T         | C       | AGACCATTATTTATTGAATCTCAACTCACCTAAC<br>TACTCCACTAAATACTATTAATAGTGTACTTTAG<br>TAAGTGAAACTTATTTTATCATAGAAATTAGT     | NA                         | NA                          |
| Ca-II-SNP358 | 189.70                 | Ca- <i>desi</i> -LG(Chr)2 | 6939183                 | ATCAAAGAATAAGACTTCACCATCCTCCGCACGTT<br>GTGGAGGATTTTCTTCAACTGCATCCTCAACTGAA<br>GGAGCGGCAGTATGTGTTGATGGATTGTTA | T         | C       | ACTGCCTCAAAGAACATAAGTCTGCCTCTCCA<br>CTATCTCATTCTCGCACCCCTCATTAACTCC<br>GCTGGCTCAACACTTCTCAATCTCCACATGTC<br>A     | NA                         | NA                          |
| Ca-II-SNP359 | 190.65                 | Ca- <i>desi</i> -LG(Chr)2 | 7044437                 | TAGGTTGTGAACTTTTTACTTTTGAGGAGTTTG<br>CAATCATTGTTAGGTTTTTCAAGGATTTTTAAGCA<br>CTGATTCGTGGTGAACCATATGTTGTGTTG   | G         | A       | TAAGTATAGCTTAATATCCAACTGAAGAC<br>AAAATAATTATAAAAAATAATAATCAACTC<br>TAATAATTATAATAGGCGAGTGATTCGGTGGA              | NA                         | NA                          |
| Ca-II-SNP360 | 191.60                 | Ca- <i>desi</i> -LG(Chr)2 | 7089449                 | TTGGAGACTGTTTAATTGTCCATAGTCATTAATTT<br>GATTTACAAAAGTGCATTCAACTATCCTTGAATA<br>CATATGCTTAGGAGGATGAGTTTGCAGT    | C         | T       | CAAGAAAAAGCAAGACTCTACAGTTCTTGAAAA<br>AGGAAAAAGTCAAAGCACAAGTCATGCTCTAA<br>TTTATGGAAAACCAATCCTCATTTCGATGAT<br>G    | NA                         | NA                          |
| Ca-II-SNP361 | 192.55                 | Ca- <i>desi</i> -LG(Chr)2 | 7100347                 | GTCAACAGGAATTGCATGCAAGTCGCAATAATGG<br>CCTTGATTGAGTGTGTGAAATTTGCCGACGTCTAT<br>TTGATATTATATTGAATGCAATAATGTCCTC | G         | A       | TTTTCATGAACATGTGCACTTATTGACATTCC<br>AAAGTCCAAACAGCATATCACAAAACCTCGGTTG<br>AGAGGACGTTATTGAATGCAATGCCCACTCAAT      | NA                         | NA                          |
| Ca-II-SNP362 | 193.50                 | Ca- <i>desi</i> -LG(Chr)2 | 7124069                 | CAAGATCAACAAAATCCAGTGACTTCTTCGAGTGA<br>ATACAGGTTACCTCTTGTCTGGATTGACTTGAAAA<br>TGACTGGTAAGCATGTAGAGTGTGTTATTT | T         | C       | TCCAATATTCTATCCACTTCAATATTCAAACCTG<br>CAAACACACAAAAAAAAGTTTAAACGGGAGG<br>TTCAATGTAAGTATCGAGAGCTTTGCACTCTC        | NA                         | NA                          |
| Ca-II-SNP363 | 194.45                 | Ca- <i>desi</i> -LG(Chr)2 | 7267988                 | TGGTGGCCCGCTGGCAAGACGTTCTTCTTCTT<br>AGCAGCAGGTACCAAGTACTCTTGACATGAGTA<br>GGCAATCAAAACCTCTACTTTTACAACAAGT     | T         | C       | GTGGTTAACTGGTTCAGGTACAAGTAGTGGT<br>GGAGGAACAACAAGTGTCAAGATTGTGGAAA<br>CCAAGCGAAGAAAGATTGTAATAATAGAAGATG<br>TAG   | NA                         | NA                          |

| Marker IDs   | Genetic positions (cM) | Chromosomes      | Physical positions (bp) | Flanking sequences/Forward primers                                                                           | ICC 12968 | ICC4958 | Flanking sequences/Reverse primers                                                                                                                             | Annealing temperature (0C) | Amplified Product size (bp) |
|--------------|------------------------|------------------|-------------------------|--------------------------------------------------------------------------------------------------------------|-----------|---------|----------------------------------------------------------------------------------------------------------------------------------------------------------------|----------------------------|-----------------------------|
| Ca-II-SNP364 | 195.40                 | Ca-desi-LG(Chr)2 | 7520753                 | TTTCCATAGCTAACTCGTGCACATAATGTTGTGC<br>GTGTTCAATGATAAAGTTAGAGATTTGTTATGTT<br>GTGCAACCAATCACATCAAAGTATATGGA    | C         | A       | ATTGAAGACCTTCAATCAATTAGTCCCTCCTTC<br>ATCTAACAGGGTCAATAATGTTGAGTTGGCAA<br>AACATTTAGGGCATGCTTAGTTTTGAAAAATT<br>GTTTAAGCTTTTGTGATCTCTATTCGCAATTC<br>AAATTCATCACAA | NA                         | NA                          |
| Ca-II-SNP365 | 196.35                 | Ca-desi-LG(Chr)2 | 7527128                 | AAATGTTCTACTTATCTTTTGAACCTTCCCTCTAGA<br>CATTCTATGTATCCTCTAAACCTTCCCTTTGGACG<br>TTCTATGTATCGCATGAACATTCCTTCTA | G         | T       | GTCCAAAGGGAATATTTAGAGGATAAGCAGAAC<br>GTCAAGAGGAAAGGTTTATAGGAGAGTAGAAC<br>AATCAAAGGGAAGGTCCAAATGATGCGTTGAA<br>CGT                                               | NA                         | NA                          |
| Ca-II-SNP366 | 197.30                 | Ca-desi-LG(Chr)2 | 7585433                 | ATATACTCTATGTCTCATTATAAGTGCCTTCTTT<br>CAAATATTTGTCTCAAATATTTGTTACTTTAGAAT<br>AACCATGCAATATTTATTAACCTTTTCC    | T         | A       | TTTTAGTGAATTACGTGTTAAGAATAAAATACC<br>ACATTAATTTGGAGTGGTCGAAAGTAAGAGTAGA<br>GACTTAGTTATTTAAATAAAATGAGTGATTTTT                                                   | NA                         | NA                          |
| Ca-II-SNP367 | 199.20                 | Ca-desi-LG(Chr)2 | 7701830                 | CCACTTTGGATTCTCTAGAGATAGAATTCCTTTT<br>CTTTATTTAGGGGTTCCAATTTTAGAGGAAACC<br>AAAAGCTAACCATTTAATACCCATTGTTGA    | C         | T       | CAACATAAAATTCGAATACAAGTATCTAAAGA<br>ATTAAGAATGTTAGTCCATGATCGAAAGCATGG<br>ACCCTTTCTAAGAGGAAAACCTGTTTTGATGC<br>G                                                 | NA                         | NA                          |
| Ca-II-SNP368 | 200.15                 | Ca-desi-LG(Chr)2 | 7726596                 | TCAAGGGTAATGTCAAGTTTCTATTTATCTTAATT<br>ACTCTCATGCTGCTTTTTATTTGTTTTGTTTTGTTA<br>TACTTAGTAAATTACCTTTTCTTATCTA  | C         | G       | GGCACCAATGACTCCAAGACTAGCAAGCCTCA<br>AAAACCTCATATGGTGCTGACATGTTGTGGTTC<br>GAAGGATCGGATACAAATAGAGAGGTATATAAG<br>CT                                               | NA                         | NA                          |
| Ca-II-SNP369 | 201.10                 | Ca-desi-LG(Chr)2 | 7736715                 | TTTCCATAGCTAACTCGTGCACATAATGTTGTGC<br>GTGTTCAATGATAAAGTTAGAGATTTGTTATGTT<br>GTGCAACCAATCACATCAAAGTATATGGA    | C         | A       | CCACCTTATACTGTTTACGTTGGTTGTCACGGC<br>AGAAACCAAATCCAACAAAATAAAATCACAAAG<br>AGAGAGGTGACTTTCAGCATTTTTTCATTTGTTA<br>C                                              | NA                         | NA                          |
| Ca-II-SNP370 | 203.00                 | Ca-desi-LG(Chr)2 | 7757375                 | AAGAAGAAGGGGTTAGGGCTCATAACGATTTCTGG<br>GTATGAAGGGGTTAGGGAAGAGGCGATTTCTGG<br>GTTTACCTTGACAATTTCTGGGTATAATCTG  | A         | G       | TATAAAAAATTTCTGTTAATTTTTAAAAAAGG<br>TCCCAAATAGAACTAAATTAATTTTATTAATTT<br>TAGTAGTGTTAACATAGGCTGCCTTCCAAAAC                                                      | NA                         | NA                          |
| Ca-II-SNP371 | 203.95                 | Ca-desi-LG(Chr)2 | 7839853                 | TAGGACATGACTTGTACTTTTACTTTTTCTTTTC<br>CAAGAGTTGTAGTGTCTTGCCTTCTGTCAAGTA<br>CAACACTTTTTTCTATTATGGTACTTTTG     | A         | G       | AACAGTAAAAGGATAAAACAAATCAAGAGGATTC<br>AAGACAGAGGATGAATAAATGAAAGGATGAAC<br>TCTGGTGTATTATCCTCTTACATAGGGAATG<br>T                                                 | NA                         | NA                          |

| Marker IDs   | Genetic positions (cM) | Chromosomes               | Physical positions (bp) | Flanking sequences/Forward primers                                                                            | ICC 12968 | ICC4958 | Flanking sequences/Reverse primers                                                                              | Annealing temperature (0C) | Amplified Product size (bp) |
|--------------|------------------------|---------------------------|-------------------------|---------------------------------------------------------------------------------------------------------------|-----------|---------|-----------------------------------------------------------------------------------------------------------------|----------------------------|-----------------------------|
| Ca-II-SNP372 | 204.97                 | Ca- <i>desi</i> -LG(Chr)2 | 7865097                 | CTTTCAGTTTTTTGGTTCTTTATTTTTGAATGCGGC<br>CCAATTA AAAATCTTTCACCTGAAATTAATGCGGC<br>CCAAGTTTTGAAACATATACTAAAGCCCA | A         | G       | TTGATGTCATGTGTTTGTCTTTTTTCGAATAA<br>TTTAATTTAATGTCATGTGAAATTAGTATATGTT<br>TCAATTTCACTGGAAGTTTTGGGTGGGCTTTA      | NA                         | NA                          |
| Ca-II-SNP373 | 205.99                 | Ca- <i>desi</i> -LG(Chr)2 | 7884187                 | GATATTTTCTTGAAAAGCCATGAACGGCTCCTTTT<br>TCCTCTTTTGATTGGCCAACCTCTTTATGTTGATT<br>TTCAATACTTCAGATATTTTATCCAAACT   | C         | A       | TTCAAGACTTTCAGTTGGCCCTGACATTAGAGG<br>AATTTGAACGAATATTGGGTACCCTTAGAGA<br>AAGGAAATCCTTATCGATATACTGGGCAACCAC<br>C  | NA                         | NA                          |
| Ca-II-SNP374 | 207.01                 | Ca- <i>desi</i> -LG(Chr)2 | 7916698                 | ACGATATCAAATACATTGTAAGTTCACCTACTTCGC<br>ACAATATCGCCAAATTTTTTTCTTTTTTTTTTTTTTA<br>GATTCAGAATCCTTTTTATATTTGTGAA | C         | T       | AATTGCTATTTGCCTGGGTCGAAAAAGTCTTTC<br>TCATCAGCTAAACCTACTAACACTCTCTATAGC<br>GTGCGATTTAAAAAAGGGCAAAATACT<br>C      | NA                         | NA                          |
| Ca-II-SNP375 | 208.03                 | Ca- <i>desi</i> -LG(Chr)2 | 7936003                 | CTCGTTGATGGATCATCGGAACTCTAAGGTATGCT<br>CTTGAAAGTGCAAACACGAGAATGGAGTTGAATT<br>GTGTTTGACTAAGTTGATATATTTTTCATTA  | T         | G       | AAGCAGGATAAATTACTTATGTCACTTTATTCTT<br>GCACTCCTTGGTTTTGTTATTGCTTCTACTCCA<br>AGTAAATCATCAAGTCTGAAGTATTTAATCAA     | NA                         | NA                          |
| Ca-II-SNP376 | 209.05                 | Ca- <i>desi</i> -LG(Chr)2 | 7949370                 | TCCAGGATGAGTTGTCAAGCATAAAGAAACAACCT<br>GCACAGGGGTTTTCTCCTGATGATGCATATCCACT<br>GGGACCTCCATTGTTTATGGAGACACCAAG  | A         | G       | TGAAACAGAGTTTTCAAAGCCACTTAAATGCCG<br>ATACAGTTATAAAGGATTTACCTCATCAAATC<br>TGAAACTCAATCTGAGCAAGTGGAGAACATG<br>G   | NA                         | NA                          |
| Ca-II-SNP377 | 210.07                 | Ca- <i>desi</i> -LG(Chr)2 | 7962223                 | TTGCTGCTGGTTTTATGTAACACTTATTGATTAT<br>GGCTACTTATGAAGATTTTCTTCGGTGGAGAGAGT<br>ATTGTCAGAACTCGAGTTCGGCTGTTTCC    | A         | G       | AGAGTCTTATTACCAGTAATGTGATCAGATGCA<br>CTAGAATCGAGAATCCATGGGCTATGAGAAAGT<br>GAGATGCAAACAGGTGAATTACCCTTTGTGCG<br>G | NA                         | NA                          |
| Ca-II-SSR65  | 211.09                 | Ca- <i>desi</i> -LG(Chr)2 | 8238017                 | TTATAATAAGCATGTGTGCATGTG                                                                                      | (AT)13    | (AT)17  | TGAAAAGGAGAGATGATCTACATTG                                                                                       | 57.79                      | 138.00                      |
| Ca-II-SSR66  | 212.11                 | Ca- <i>desi</i> -LG(Chr)2 | 8278851                 | CAACAAAACAGACACGCACG                                                                                          | (AT)10    | (AT)11  | CATTTGAGTGACCAATGTTTGAA                                                                                         | 61.35                      | 123.00                      |

| Marker IDs   | Genetic positions (cM) | Chromosomes               | Physical positions (bp) | Flanking sequences/Forward primers                                                                            | ICC 12968 | ICC4958 | Flanking sequences/Reverse primers                                                                                                                                                                                                                                                              | Annealing temperature (0C) | Amplified Product size (bp) |
|--------------|------------------------|---------------------------|-------------------------|---------------------------------------------------------------------------------------------------------------|-----------|---------|-------------------------------------------------------------------------------------------------------------------------------------------------------------------------------------------------------------------------------------------------------------------------------------------------|----------------------------|-----------------------------|
| Ca-II-SSR67  | 213.13                 | Ca- <i>desi</i> -LG(Chr)2 | 9991894                 | CATAATTGAATTGTTTCCGCTG                                                                                        | (AT)7     | (AT)8   | TGTGTGAGGTTGAGTGAATGC                                                                                                                                                                                                                                                                           | 59.49                      | 130.00                      |
| Ca-II-SSR68  | 214.15                 | Ca- <i>desi</i> -LG(Chr)2 | 10069811                | TGGAAAGGAAGAGAGCAACAA                                                                                         | (TCA)29   | (TCA)21 | GAAAGCATCAGCACTTGCAT                                                                                                                                                                                                                                                                            | 59.98                      | 205.00                      |
| Ca-II-SNP378 | 215.17                 | Ca- <i>desi</i> -LG(Chr)2 | 10438749                | TTTTATCCTGGTTCACCCAACGTGGGTTACGTCCA<br>GTCCCTCACACTGTGAGATTTTCCACTATGTGTTTA<br>AAAACAAGAACCCTTCTTGATCTTACAACA | G         | A       | GTCATATCATATCAATCCTATATATATTTTTCTT<br>TTTATGCAAAATCGTTGGTAGTTAAATTAACATT<br>TTTACACCTTACCTGGGTTTGAACCTGGTCTT<br>TCGACTCCTGCCTCTTCAACCCTCGGCTCAA<br>AGTAGTTGAGCTACCCAATCCCCATATCAATC<br>CTATATGGTTTGCCTAGGG                                                                                      | NA                         | NA                          |
| Ca-II-SNP379 | 216.19                 | Ca- <i>desi</i> -LG(Chr)2 | 11268840                | GTGTTCTTCTACTTATATTACTATTAACATGAT<br>TTCAAACCTCACCTCCTTCGTTGTTTGTGTTTGC<br>TGGCTTGACCCTTCATTTGCGAAATCGCA      | G         | C       | AAAGACATTAGGATACTCGGCGGAAAGGCTG<br>TCATACTATTGCTTCCATAGATAGGGCCTGCAA<br>CAATGTAGATTGTTGTAGTTGAAGGTATCCCA<br>TGGCCTTGAGAAAAATGGCTGCTTCTTTGGTG<br>ACATAGGCGATCCTCCTTGAATCGCCTTTCGA<br>CGCTATCGATCTCTTTTCTTTCCAATGCTTGA<br>CTCCATACCTCATAACCCTTAGTTCCTCAGCTT<br>CTCAACACTAAGATTATCGCTAAA           | NA                         | NA                          |
| Ca-II-SNP380 | 217.21                 | Ca- <i>desi</i> -LG(Chr)2 | 12031041                | AAGGAATGCCCCATCTGTTTATCTGAGAGGCTC<br>ACCACAAAACAGAATACCGAGGTTTCGACTTTGG<br>GGTCATGATGGTCCGGTTACTTCACTTGCTTT   | T         | C       | CGCGCAGACAAAAGCCGAACTCGGTTACTTTA<br>GTTTGTGATTATCTGCATGTGCTAGAATAGGA<br>GCTTTGACATGTGGAAAAGAGATTGATGCTCAT<br>GCATTGAGAATTGGAGTGAGTTATGATGTTTT<br>GTACCTAATGCAATCTTGGACATGTATGTAAGG<br>TGTGGAAGAATGGAATACGCATGGAACAATTT<br>TTCTCAACTGATCA                                                        | NA                         | NA                          |
| Ca-II-SNP381 | 218.23                 | Ca- <i>desi</i> -LG(Chr)2 | 12357547                | GTTGTTTGTAGTTTGTATGTCAACTATAAGTTCTC<br>CCTCCGCTTCATATTTAATTTATCTTTAAGGTTA<br>TGCACACTTCTTAAGAAAATCATCGAGTG    | G         | A       | TTTAGACTTTGAAACAACAAATGCAGTGTCTC<br>TGATCTCATTCTTTGTTTCTCACCCCTTTTCTC<br>TGCCGACCCATTTTCACTTACTCAACTCAACGT<br>CACGTGCCTCCACATGCTTCTTATTCTTTCTC<br>AGATCAAGTAATTTTGGGTTTTCTGTACCATG<br>GATGGCATTGTTGGGGGAGATTCTCGGATGCA<br>GATAAGCGACGGACAGCATCCTGTACATGTGC<br>CTTATCAACTATCCATTCCAGCATATCAACA   | NA                         | NA                          |
| Ca-II-SSR69  | 219.25                 | Ca- <i>desi</i> -LG(Chr)2 | 13422213                | ACCTGCAAAATGCACATAAAA                                                                                         | (AAT)10   | (AAT)12 | AGCATGGGGAACAAAAACA                                                                                                                                                                                                                                                                             | 57.53                      | 175.00                      |
| Ca-II-SNP382 | 221.29                 | Ca- <i>desi</i> -LG(Chr)2 | 13759775                | ATCAAAGAATAAGACTTACCATCCTCCGCACGTT<br>GTGGAGGATTTTCTCAACTGCATCCTCAACTGAA<br>GGAGCGGCAGTATGTGTTGATGGATTGTTA    | T         | C       | CTCATATGAATAATGTTATAAAGTGACAGAAAA<br>CCTATAAAAAAATTCTTTGAAGATTTAAACCAT<br>TCAATATTAATTACAATGGACCTAAAGTACTACA<br>AAAGTCAGGCCACTCAAGATTCATGAAAATTT<br>GGTTTAGGCACAGGACCACTGCTTTGATGTGA<br>AGGACTGAGCTTTTGAATCCAATGGTGAAGCC<br>CCTTTTATGATCTTGGCAAAAAGGGTTTGGCA<br>CCACCGAAATTTCTTCTCATCAGCAACCGAA | NA                         | NA                          |



| Marker IDs   | Genetic positions (cM) | Chromosomes               | Physical positions (bp) | Flanking sequences/Forward primers                                                                           | ICC 12968 | ICC4958 | Flanking sequences/Reverse primers                                                                                                                                                                                                                                                                                                                                                                                                                                                          | Annealing temperature (0C) | Amplified Product size (bp) |
|--------------|------------------------|---------------------------|-------------------------|--------------------------------------------------------------------------------------------------------------|-----------|---------|---------------------------------------------------------------------------------------------------------------------------------------------------------------------------------------------------------------------------------------------------------------------------------------------------------------------------------------------------------------------------------------------------------------------------------------------------------------------------------------------|----------------------------|-----------------------------|
| Ca-II-SSR70  | 222.31                 | Ca- <i>desi</i> -LG(Chr)2 | 14142854                | TTCTTTGTACCGTTAGCAATCAT                                                                                      | (ATT)22   | (ATT)28 | GAGCGATAAATATCCCCAAA                                                                                                                                                                                                                                                                                                                                                                                                                                                                        | 57.91                      | 238.00                      |
| Ca-II-SNP383 | 223.33                 | Ca- <i>desi</i> -LG(Chr)2 | 14207756                | CAATACAACCTTTTAGAACCAAGAGCGGCTTTAT<br>CTCATTGATAGCCCTCCTCCTAAGGGTGGCCT<br>TTCCCTTAGGGGCGGCTCCATCTAACGGATG    | G         | A       | CAGATGGTTGCTCTTCTTCCACATTTCTCTGC<br>TTGATTTTATTCATTCAACATTGTTGCTT<br>TCAAGGACCAACAATGGATGAAAGCCACTGCA<br>ACTTATGCTAAAGACACAGAAGGATCACTAATT<br>ACAGAAGGAGCTTGTGGTTATGGAGATCTCCA<br>CAAAGCAAGCTATGGAAAACACAGTGTGGATT<br>AAGCACTATTTGTTCAATAGAGGGAGTACATG<br>TCCAGCTTCTTTTACATAACATCTCTTCAACA<br>GTCTCTCCACCGCCGCCACAACAAACACAATC<br>GGCGTCAACTACGGCACCGTCGCCGACAACCT<br>CCACCGCCATCCACAGTAGCCACCTTCTCA<br>AATCCCAAACCCATCAACCACATCAACTCT<br>ACGACGCCAACCCAGACATTCTCCGCGCCTTC<br>GCCAACACCGGTA | NA                         | NA                          |
| Ca-II-SNP384 | 225.37                 | Ca- <i>desi</i> -LG(Chr)2 | 14348649                | TTGTTTCATAGCCTTAGTGTATAACACTCAATCCTTT<br>TACCCTTATCTTATATTTGTGTTATGCTTTTAAAT<br>AATCAATAGTTAAATCTTTTTGTTGTTT | G         | A       | GTCTCTCCACCGCCGCCACAACAAACACAATC<br>GGCGTCAACTACGGCACCGTCGCCGACAACCT<br>CCACCGCCATCCACAGTAGCCACCTTCTCA<br>AATCCCAAACCCATCAACCACATCAACTCT<br>ACGACGCCAACCCAGACATTCTCCGCGCCTTC<br>GCCAACACCGGTA                                                                                                                                                                                                                                                                                               | NA                         | NA                          |
| Ca-II-SSR71  | 226.39                 | Ca- <i>desi</i> -LG(Chr)2 | 15249055                | TTCTAAGTTTGGGGTTGCTCA                                                                                        | (ACA)9    | (ACA)10 | CCAAAGTGCACAAACTGATT                                                                                                                                                                                                                                                                                                                                                                                                                                                                        | 59.73                      | 114.00                      |
| Ca-II-SSR72  | 227.41                 | Ca- <i>desi</i> -LG(Chr)2 | 15754194                | TGGATTTGGATTGCATGTTG                                                                                         | (TAA)23   | (TAA)22 | GTCTCGCACTTAAGCGGTTT                                                                                                                                                                                                                                                                                                                                                                                                                                                                        | 60.32                      | 178.00                      |
| Ca-II-SNP385 | 0.00                   | Ca- <i>desi</i> -LG(Chr)3 | 4709                    | AAGAGTGGCTTGTACGAAACTTATTTCTCGACTTT<br>TTTTCCCTTCGATGAATTTCTTTATAATCCGTTT<br>TCGTTAACATTCAAGATTTTTATTGTTT    | A         | C       | CAGTGGATTAGAGAGTTATCTGCAACAAAATAT<br>TATAAATACAGTAGATTATTATATTACGTA<br>CGTACATAGGAAACCCGTTAAACACATGCATT                                                                                                                                                                                                                                                                                                                                                                                     | NA                         | NA                          |
| Ca-II-SSR117 | 1.15                   | Ca- <i>desi</i> -LG(Chr)3 | 41679                   | CGAGTACGTTTGGCAACAGA                                                                                         | (GT)6     | (GT)7   | CCAGGTAAGCAAGTTCAGC                                                                                                                                                                                                                                                                                                                                                                                                                                                                         | 59.90                      | 163.00                      |
| Ca-II-SNP386 | 2.27                   | Ca- <i>desi</i> -LG(Chr)3 | 45404                   | GTGTAGAGACCCGGGCTTTCAAATATAACTGAA<br>GAACAGATACTCTGGTTCATACTTTTGGAGCTAGA<br>TTTTATTTGGATGCATTATTTCCAATTAATG  | G         | A       | GTGATCTTAGAAGATCAATTGTTAACTAGTAT<br>TGTCATGAAGTAGTAAATGTTTAAAGCATTCTCA<br>TTACTAAAAGACAATGCACCTTTATGCTACGTGA<br>ACTGAAGGAAGGTTCAATTGTTGTGGCGTACAA<br>TGTTAAATTTT                                                                                                                                                                                                                                                                                                                            | NA                         | NA                          |

| Marker IDs   | Genetic positions (cM) | Chromosomes               | Physical positions (bp) | Flanking sequences/Forward primers                                                                           | ICC 12968 | ICC4958 | Flanking sequences/Reverse primers                                                                                                                                                                                                                                                             | Annealing temperature (0C) | Amplified Product size (bp) |
|--------------|------------------------|---------------------------|-------------------------|--------------------------------------------------------------------------------------------------------------|-----------|---------|------------------------------------------------------------------------------------------------------------------------------------------------------------------------------------------------------------------------------------------------------------------------------------------------|----------------------------|-----------------------------|
| Ca-II-SSR118 | 3.39                   | Ca- <i>desi</i> -LG(Chr)3 | 70241                   | TGTTGTGTGGTTTCCTCTCTTT                                                                                       | (AT)11    | (AT)12  | TGAGAGGCAAGAAGAGAAATG                                                                                                                                                                                                                                                                          | 58.74                      | 115.00                      |
| Ca-II-SNP387 | 4.51                   | Ca- <i>desi</i> -LG(Chr)3 | 145155                  | GATTTGGTTGAGTATATGAGTTACAGGGAGACATT<br>AGCCCATTCCCAATCGATTATGTTTGTAAACATG<br>AATCGACTGAGTAATCGATTATTTGATCTT  | A         | T       | TTTGCTAATCGATGTTTTAATGCATAAATCAGA<br>AATTTGATGCTCAGTTCATCTCAGAGTCGATTG<br>AGTAATCGATTATATTTGTTTTGTTCAAAGTG                                                                                                                                                                                     | NA                         | NA                          |
| Ca-II-SNP388 | 7.87                   | Ca- <i>desi</i> -LG(Chr)3 | 276679                  | ACTCCTCTCCTCTCTCATACCCCTTTTCTCTCTGTT<br>CACCGAACCCAGAAAGAGAGTCTACTCACCGAAT<br>CTAGAGAGACTCTTCTTTTCTTTCTCCTC  | C         | G       | CTTATAATTAAGAAGTAAATAAGCAAGAAGAAA<br>AAACCCCTAATAATCGGTGTAATGAAGTAGAAT<br>GAGAGAGAGAAATGAAAATACCGTAAAAATGG<br>AT                                                                                                                                                                               | NA                         | NA                          |
| Ca-II-SNP389 | 8.99                   | Ca- <i>desi</i> -LG(Chr)3 | 339706                  | CCTCTTCTACTACAGCTGCTGCCACTCAAGTTGT<br>TGAAGGGCTTCTTGAACATTTCTTGGAAATATATGT<br>GTTATCAAGTCTGCTACAAATGCCCTGTA  | T         | G       | TCAACTAACAAAGACGTTTCTATTTCACTAAGAA<br>AAGGGAAAGAGAACTTTTACTCAACCAATTGA<br>AATATTTGTGCTGATGAAAAATTATCACAAAA                                                                                                                                                                                     | NA                         | NA                          |
| Ca-II-SNP390 | 12.35                  | Ca- <i>desi</i> -LG(Chr)3 | 628033                  | GTAACGAATACAATCCGAGCTTTTAACCAGTTGC<br>TCAACCTCTTCGCTTCAATAACAGCTCTTTTAAT<br>TTTTTCCATTGCTGAACACCCTAATTC      | G         | T       | GGATGGCGAGGTAATTTTCTCAATCAAATTAAG<br>TTAAATTATATTTTTAACATTTATGTTTAACATA<br>TATTTTTGCTTAAATAATTCAGGATCGGGG                                                                                                                                                                                      | NA                         | NA                          |
| Ca-II-SSR119 | 13.47                  | Ca- <i>desi</i> -LG(Chr)3 | 748034                  | GTTCACTCGTATCCGAAGCC                                                                                         | (TCT)12   | (TCT)11 | TTGCTGTAGGAATGGAATTGG                                                                                                                                                                                                                                                                          | 59.70                      | 155.00                      |
| Ca-II-SNP391 | 14.59                  | Ca- <i>desi</i> -LG(Chr)3 | 776626                  | TTAATCATTCCATCGATGTTTACACTTTTCATTCAA<br>GCACGCGTAAAATATAGTTGCCGTTTCATCAGCT<br>GAACGAGTCTGAATTTCCATATAAGCAGCT | G         | T       | AGAGATATTGAGTAACTATGTAATCTTTGGTAT<br>ATTTTTATTGTTTCCATTTTCCCTTTCTTTTC<br>TGTAGTACCATGCCAAATTGCCGTCATGATA                                                                                                                                                                                       | NA                         | NA                          |
| Ca-II-SNP392 | 15.71                  | Ca- <i>desi</i> -LG(Chr)3 | 811886                  | GTGTAGAGACCCGGGCTTTCAAATATAACTGAA<br>GAACAGATACTCTGGTTCATACTTTTGAGCTAGA<br>TTTTATTTTGGATGCATTATTTCCAATTAATG  | T         | C       | GCTTATTTGGAGATTTATTTCTTGTTAATTTAGT<br>GATGGTCGTGAATGATTATGAAGCATAATCATG<br>TATTAGAGAGATTAACAGGGTAGTTGTGAAAG<br>AGTCATCCCATGGATTACCCCTCCAATCATCTA<br>GAAAAGGCATATCACGACAAGCCTTCAAACAA<br>CACTATTACACTTAAAACCTGACCCGAATGCAA<br>TTTGCCACACCCTATCTCCTTTTGAAACTCTAC<br>CTTACTCTCTCTAAGCAACTCATACCAA | NA                         | NA                          |

| Marker IDs   | Genetic positions (cM) | Chromosomes      | Physical positions (bp) | Flanking sequences/Forward primers                                                                  | ICC 12968 | ICC4958 | Flanking sequences/Reverse primers                                                                                                                                                                                                                          | Annealing temperature (0C) | Amplified Product size (bp) |
|--------------|------------------------|------------------|-------------------------|-----------------------------------------------------------------------------------------------------|-----------|---------|-------------------------------------------------------------------------------------------------------------------------------------------------------------------------------------------------------------------------------------------------------------|----------------------------|-----------------------------|
| Ca-II-SNP393 | 17.95                  | Ca-desi-LG(Chr)3 | 839950                  | TTAGATCAGTATGGCGGCTATAGCCGGTTTTATATGCTTTGTAATGTTTCTAATTGGGTCATCATGAGATCTCAATTTGGTATGTGTCATCAAAGTAT  | A         | C       | GATTTATTTTCTTCATTCTGCTGAGGCGTGCGATTACACAACCAACAAGATGTGTGAATTTATTCAATAAGAATAAATTAATGTCAAATGTTATACACT                                                                                                                                                         | NA                         | NA                          |
| Ca-II-SNP394 | 19.07                  | Ca-desi-LG(Chr)3 | 859723                  | TGGCCAGAGGTGTCACACGGGTTGGTGGAGGCGTGTGGGTCTCACGCCAAATAAGGAGGTGGCGCGTCCGTATGAGTTTGGCAGCGCAAAAATGTCA   | A         | C       | CTGCCATATATTTGTGTGCTCATTTTAGTCTCCGCCATAATTGTTTCTCACTTCTTTCAAAGCTTCAACATTTCCCAACAAGCAACACCATGGCTAACCCACCCCGGTTTCGTCCATGGTCCCGTTAACCTCCATTGCCCCGCACCTGCTCCTGCTCTGACACCTGCACCTGCACCAGCTCCAGCTCCAGGCCACGACCAAGTTGATTCTACCTACATCTACACTCTCTCAGCAACCACTCAGCTCATAAT | NA                         | NA                          |
| Ca-II-SNP395 | 21.31                  | Ca-desi-LG(Chr)3 | 955191                  | CACACAAGAGTGTGGAGTGCCTAGAATGTTCTTCTCAATAATCTGATATCCAACTCTATCTTTGTTACGTGGATGGCAAATACTTGAGCTATAAA     | C         | T       | ATGATGTTTCATCCTCAGAAGAGAAAGAGACTATGGGGTTAAATGTTTCCCATCACATTACTCCCAAGTTTGTCCCTTCCCTATTAGGTATGCTTGTGA                                                                                                                                                         | NA                         | NA                          |
| Ca-II-SNP396 | 22.43                  | Ca-desi-LG(Chr)3 | 1088367                 | GTGTAAAAGTGTGTCACACTAAGTGTGATGCTCTCATTTTTCTCATAGAAATTCATGTTGGCCATACCCAAATCAGTTGTTTGCCTTAGTGTTTGTTTT | C         | T       | TGGGAGAATCTCCAGTAGTTGGATCAACAAGATCCCCAGGTCTAGTGATGCACCTTCATTATACATTAGAGACTGAAAAATGATAAAATGTAAGACA                                                                                                                                                           | NA                         | NA                          |
| Ca-II-SNP397 | 23.55                  | Ca-desi-LG(Chr)3 | 1201004                 | GGTTTCCTGTCTCTGTAACCTTGGCACTAGCTCTCTTGATTACCCATGGATGCAACAAGATTCACATCAGTCAAGTCCACCTCAACAAGTGGAAATTC  | A         | G       | ATGAGCACGGGTGCAACAGAAAATCCAGAATAATGCTGCAATGGATAAATACCTGAGCTTCACCAGTGGAACTAGAAGGGGACTGGGCAGATGCAGATC                                                                                                                                                         | NA                         | NA                          |
| Ca-II-SNP398 | 24.67                  | Ca-desi-LG(Chr)3 | 1219565                 | AAGAGTGGCTGTGACGAAACTATTTCTCGACTTTTTTTCCCTTCGATGAATTTCTTTATAATCCGTTTTCGTTAACATTCGAAGTTTTTATTTGTTT   | C         | T       | CTTAAATCCCAAAAGTTTCTTCGGCCACAGCTCTTCAGTGAAAGGTGTCTGGACCGACGGATCTTGGGTGTTTTCGACTGGACTTGATCAGCGGGTCAGATGCTGGTATCTTACCAAAGTAAACTATTGAACGAGCACACCTAATAGTTAGTGTCCGGAGCCAGAAGCGTTATCTGCTAGGGCTGTAGCAGGAACCATTATCAGATTGCTGTTGCTGGAAGCCGATCCAAATACTCCACTTCTCCGATCCT | NA                         | NA                          |
| Ca-II-SNP399 | 25.79                  | Ca-desi-LG(Chr)3 | 1356024                 | ATAAAAAAGCACATTTAATAAAGGGGTGCACCGACCTTGAAAGGGGCTGTTTTAACGGCTTCTGACCGTACTTTCTCCATCTGTACCCATCTTCCA    | G         | A       | TGTGGTTGGTATATTTAAAGGTTGAAAGTTAAAGAACAAATGAGAAGAGACAGAGAGAAGCTAGAATAGCTTTCATGACGAAAAGCGAGGTGGATCAT                                                                                                                                                          | NA                         | NA                          |
| Ca-II-SNP400 | 26.76                  | Ca-desi-LG(Chr)3 | 1416213                 | GATAGTTTCTTTTTCTTTTCATCATGTGACACTTAATAGGAATTTGCATTGATTTATCCAGGTCCTTGGAAATAAATGTCTTTGGATTGGGACAC     | T         | C       | ATATGTTGGTGCCTTGAATCTCTGTGTATTACACACGGCTGTGAGTCTTCGTGCAGGTACGAAAGTCTCTTGCAGCATCAAGAGCAATCTTATTCT                                                                                                                                                            | NA                         | NA                          |

| Marker IDs   | Genetic positions (cM) | Chromosomes      | Physical positions (bp) | Flanking sequences/Forward primers                                                                           | ICC 12968 | ICC4958 | Flanking sequences/Reverse primers                                                                                                                                                                                                                                                                                                                                                                             | Annealing temperature (0C) | Amplified Product size (bp) |
|--------------|------------------------|------------------|-------------------------|--------------------------------------------------------------------------------------------------------------|-----------|---------|----------------------------------------------------------------------------------------------------------------------------------------------------------------------------------------------------------------------------------------------------------------------------------------------------------------------------------------------------------------------------------------------------------------|----------------------------|-----------------------------|
| Ca-II-SNP401 | 27.73                  | Ca-desi-LG(Chr)3 | 1447555                 | CGTATAGGCAAATATGTGTGGCTTTTGTCTCCTGT<br>TAAGTGTTAACTGCCATTGCTTTTTTATTTGGATG<br>ACTATTGCTGCTTTATTCTGATTCATCC   | T         | G       | CCCAAATCCATCCATTACTTGGAGAGTCATCA<br>AATGATGCTGTTGGAACTTGTCCATCAAGATA<br>AATCAGTTGAAAAAGCAAATCCAGGTGGAGAGA<br>ATTGTATCCATTCATGAAAAATTCAGAGGAAC<br>CAGAAGAAGCTACAATGTCATATTTTCAGGAATA<br>ATGTCAGCGGTATCAACCAGGGGCTCTTCACA<br>GATGGAGGAAAAAAGACACTTTCAATGCTTTTC<br>TTCAACAATGCACCATCCTTTATGTAATTCCA<br>TTTAAAAATATGTAACATAATTATCGGGTCGAC<br>GGATTCAAATGTTAAACCCATTATCCGAACCA<br>AATATAAGCGGATTTCCACCGGTTGAGTTGAGT | NA                         | NA                          |
| Ca-II-SNP402 | 28.70                  | Ca-desi-LG(Chr)3 | 1525532                 | TTTTTCATATTCGTAAATAGGGGTGTACATGGATG<br>CAGGTCGACCCGTCAATCTGATCACCAAATTTGAT<br>TTTTATCCGTATTCGATCACTTTTGGGTCC | A         | G       | TTTAAAAATATGTAACATAATTATCGGGTCGAC<br>GGATTCAAATGTTAAACCCATTATCCGAACCA<br>AATATAAGCGGATTTCCACCGGTTGAGTTGAGT                                                                                                                                                                                                                                                                                                     | NA                         | NA                          |
| Ca-II-SSR120 | 29.67                  | Ca-desi-LG(Chr)3 | 1602316                 | TGAGCAGCACACACTTAGGC                                                                                         | (GGC)7    | (GGC)5  | CCCAAGCCCATTTTCATTTAC                                                                                                                                                                                                                                                                                                                                                                                          | 60.21                      | 100.00                      |
| Ca-II-SNP403 | 30.64                  | Ca-desi-LG(Chr)3 | 1618294                 | TTCTTGGTGCAATCTTCTAACCCTTAACCTCTTT<br>GATTTACTATATTGCTATATTTGTATATGTTAA<br>AACTAGATGCATGTTAAACATATTCTGT      | C         | T       | CATGAGATCTTAACCAGATGTTTATGTTTGT<br>GATTTAGTCATTTTTCAGTACTAGTTCATATAAA<br>ACCCTTTTGTGAGCAGTTGATAATTGTCTGTC<br>GTTTGATTCTATTTTGATTTGATTTGATTTAAT<br>TCTTGCCCTGAAAATAAATTAGATGCAAAAAGA<br>AGAAGATGGTCTTCTGGGATGTGTTTCTTGTA<br>CACAAGTGGAAATGTAATAATAATAAGAATTTG<br>CTCCAGATTATCTTTGATTTCAAAACCATCAA<br>TTTTAGATCATGGACTCAAAAAGACA                                                                                 | NA                         | NA                          |
| Ca-II-SSR121 | 31.61                  | Ca-desi-LG(Chr)3 | 1632339                 | TTCTCGAGGATCCCTAATCC                                                                                         | (AG)6     | (AG)7   | TTTTAGATCATGGACTCAAAAAGACA                                                                                                                                                                                                                                                                                                                                                                                     | 58.13                      | 103.00                      |
| Ca-II-SNP404 | 32.58                  | Ca-desi-LG(Chr)3 | 1639432                 | AAACGTGATGAGTTGCGAGTTGACGAAACAACG<br>AATCGCGAATAGAAGGATGATAGCGACATTTTCT<br>CTGATAGGTTCTTAGTTTTTCAATTCCTTC    | T         | C       | ATTATTTTTCAAATAAGAAGTTGTATTATTG<br>TTTTAAAAAACTAACTATTTTTTCATTTCAAAAAC<br>AAAAAGTAGACTCAAGTCAAATAAAAAGAG                                                                                                                                                                                                                                                                                                       | NA                         | NA                          |
| Ca-II-SNP405 | 35.49                  | Ca-desi-LG(Chr)3 | 1705484                 | AGTCGGTTAGTCGGAGAAAGCTTCTACAGGCTGA<br>TGTTGGTGATGATGTTGTGGTGAGTAATATTGTGA<br>CAGTTAGTCAAGATGGAAGTGAAACTTTAC  | G         | A       | TAACTACTCTTCATAAACACCAGCCGTAAACAT<br>AAATCAAAAAGTATCCATCACTAGAAAAGAGATT<br>TATTCGGAGCAGCAGCAATAGCATCATTAAATCG<br>T                                                                                                                                                                                                                                                                                             | NA                         | NA                          |
| Ca-II-SNP406 | 37.43                  | Ca-desi-LG(Chr)3 | 1803646                 | CGAATATACAATTTTTCCATAAATCCATTACTTCT<br>TCTTGCTATCCTTTTTACATATTGTTGCATCTT<br>GCCCAACATTTTTTCAATATGAAAAC       | A         | G       | ATATGAGACTTTAATTTCTAAAGTTATTGTGACT<br>GATAGAGATCTTGCCATGATGAATGCCATTAGT<br>GTTGTGTTTCTACTTCAATACATTTGCTATGT                                                                                                                                                                                                                                                                                                    | NA                         | NA                          |

| Marker IDs   | Genetic positions (cM) | Chromosomes               | Physical positions (bp) | Flanking sequences/Forward primers                                                                            | ICC 12968 | ICC4958 | Flanking sequences/Reverse primers                                                                                | Annealing temperature (0C) | Amplified Product size (bp) |
|--------------|------------------------|---------------------------|-------------------------|---------------------------------------------------------------------------------------------------------------|-----------|---------|-------------------------------------------------------------------------------------------------------------------|----------------------------|-----------------------------|
| Ca-II-SNP407 | 39.37                  | Ca- <i>desi</i> -LG(Chr)3 | 1893159                 | GTAGATGAATAAGGAATGGTCTGAATTTGCTGTGAT<br>GGAAGCCTATGGTGGAGACATAGTCAGCAAACCT<br>CTGGTACCACGCTCGAGGAGCCTGTTTGAGG | T         | C       | CACGGCAATCTTCGTGAGACCATCTATATGCAT<br>CAGCCCATGTGTTTCGGCGATCCTGTTTCATCCA<br>GACTATGTCTGTCTTCTGCACAAATCATTATAC<br>G | NA                         | NA                          |
| Ca-II-SSR122 | 40.34                  | Ca- <i>desi</i> -LG(Chr)3 | 1900350                 | GAGCAGACTGTGAAGATTCTTTGA                                                                                      | (AAT)16   | (AAT)19 | TGAAAAACCATAAAGAAATTGAA                                                                                           | 60.06                      | 176.00                      |
| Ca-II-SNP408 | 43.25                  | Ca- <i>desi</i> -LG(Chr)3 | 2647451                 | TCCAGAAGAAGCTACTACAATGTTAGATCGAATTC<br>TTTCTCTTCTTACCTCCTCAACTGTTCTGTGCTTC<br>AAGATCAACAAAACTTGGATCCTATACAC   | C         | T       | ACCAGGCATCTAAAAATATTTATCATTAGTTAA<br>TGCTAACAAAGGAGCTAGTGAAGACCATCAGA<br>ATTAGGAGCAAAGATCTAGCAGCAGGAGCCA<br>T     | NA                         | NA                          |
| Ca-II-SSR123 | 44.22                  | Ca- <i>desi</i> -LG(Chr)3 | 2668158                 | CAAAGCCTGGTTCTTCATCA                                                                                          | (AAT)12   | (AAT)11 | CCGAGTCATAGCTACAGCGG                                                                                              | 58.85                      | 176.00                      |
| Ca-II-SNP409 | 45.19                  | Ca- <i>desi</i> -LG(Chr)3 | 2746674                 | TCGTGACGTGATCCATTGTGATTGTCATGGCATAT<br>GAAACGAGTCAGTCTCTCTATGTCACATTTCTACA<br>AATGTAGATATGAGACCAATATCAACTATC  | A         | G       | GGCTTACAGCGGAAGAAGTTTGTGACGTACTT<br>GTATCAAATGTTGTACAACATTGGATTCAATAAT<br>TTGGGCTGATACATTTGTCTTCAGTTTATTTGA       | NA                         | NA                          |
| Ca-II-SNP410 | 47.13                  | Ca- <i>desi</i> -LG(Chr)3 | 2757852                 | AAGCAAAGATTCTGATGTTTCTAECTCTACTGGG<br>ATGCAGATACTTCAAAAAATGATTTGCTTGAGCG<br>AAATGAGTCTGTTTTGTCTCTGGATGGAAG    | C         | T       | CCTCCAGCTCTTTATACAAAGCACTCATAAGTT<br>TCCTGTCATGATCAACTTGCTTTTAAAGCTTGT<br>CAACCAGACTTCTCCTTCAATTTGCTGACAA<br>T    | NA                         | NA                          |
| Ca-II-SNP411 | 48.10                  | Ca- <i>desi</i> -LG(Chr)3 | 2921225                 | AAATTTTACGTGAAAAACAACCTTCTTTGTTTGT<br>TTCATATATAAGTTTTTATTTCACTTGCAATATTA<br>CATATATTCTTAGCACCTCTCACCTGCC     | A         | G       | AGAAACAAAATGGGGGACTACTTGTGCGATT<br>CAGCTAAAATAGGAGACTAAAAGTCAATTA<br>ACCAAATAAAAAAGAAATACAAGGACCGATGTT<br>AA      | NA                         | NA                          |
| Ca-II-SNP412 | 50.04                  | Ca- <i>desi</i> -LG(Chr)3 | 3074678                 | ATTTTCTTATCATGATTGACAATGTTTATTTGTTT<br>TCAAGGAAATATTGATTGTGTTTGTATTTTATG<br>AAATTCATATCTTCTAAGTTATTTTTT       | C         | T       | CCATCCATCTATATGTTCCAGTTTCTGCAGTCA<br>TCACTCCTCCCTGATTTAGGAACCGGCAACTC<br>CAAAATCTGCCACTTTAACACCTAATTGAAAA<br>C    | NA                         | NA                          |

| Marker IDs   | Genetic positions (cM) | Chromosomes               | Physical positions (bp) | Flanking sequences/Forward primers                                                                           | ICC 12968 | ICC4958 | Flanking sequences/Reverse primers                                                                                                                                                                                                                                                              | Annealing temperature (0C) | Amplified Product size (bp) |
|--------------|------------------------|---------------------------|-------------------------|--------------------------------------------------------------------------------------------------------------|-----------|---------|-------------------------------------------------------------------------------------------------------------------------------------------------------------------------------------------------------------------------------------------------------------------------------------------------|----------------------------|-----------------------------|
| Ca-II-SNP413 | 51.01                  | Ca- <i>desi</i> -LG(Chr)3 | 3200806                 | CAAATTATTTAAACATACTGGTTGTGACTTTTGTG<br>GGGGAGCACATAAAAATGGAGATTGTGAAGTACC<br>GGATGATGATGCTTGTCTTGTCCAATTAGG  | A         | G       | CCCTAATGGACTAGAATAAACCTAGAAAGGAC<br>GAAAATGACCTAAATGTTAATCCAATGACACAA<br>ATGAACCTATTGGATGCACAAGATTGGTTAAAA<br>A                                                                                                                                                                                 | NA                         | NA                          |
| Ca-II-SNP414 | 51.98                  | Ca- <i>desi</i> -LG(Chr)3 | 3240315                 | TCTTCAGAAGATACATGTATTCACCTTTGAGATGT<br>TGTGCAACTCCCGCTAATCTTTTCATTTTCATGCG<br>TGGGACTAATTTACAAGAATTTGACTTTCA | C         | T       | GTTGTATTGAGTTGGCGTGTGGGGCAACAG<br>GAACAAAACCCCTGCCACCAAAAAGTGGACGC<br>ATAAATGCATCATCAAATTTACGCCATAAGTGA<br>TGAAACAGTGTGTGTTGGAGTAGTTAGTAAATCA<br>CGAATGCTGCTTGGACCTTGTGAATCATTGACA<br>TCAGTTTCAACTTCTGAATCTTGGTTATCTCCAA<br>GGAATGGCG                                                           | NA                         | NA                          |
| Ca-II-SNP415 | 52.95                  | Ca- <i>desi</i> -LG(Chr)3 | 3325103                 | TGAACACAATTTAAACACAATACATGTGACCTC<br>CACATAATCTCTATTTCATTTAAATTTCTTTTTCTTT<br>TATATTTCTTTTATTTATTTATCTTTTT   | A         | C       | CGTAATAATAATTTCTTTCAAAATGGTAGTATATG<br>ATAGATGGTGCATAAAGGTTTAGGTAAACAACT<br>TGTCCATTTATTTATGATATACAAAATGGGTT<br>TGGTTGAACCTGCACAACAGTTGCTATAAATT<br>CAACCTCATTGAAGGAAGTAAACAGTTGCGG                                                                                                             | NA                         | NA                          |
| Ca-II-SNP416 | 53.92                  | Ca- <i>desi</i> -LG(Chr)3 | 3495973                 | TGGCCAGAGGTGTACACGGGGTTGGTGGAGGC<br>GTGTGGGTCTCAGCCCAAATAAGGAGTGGCG<br>CGTCCGATGAGTTTGGCAGCGCAAAAATGTCA      | T         | C       | CACTGCAACGCAAACCTTTAATATGGAGTCCTT<br>TCAAACCTGAAAGGCATGAAAAGTAGCAGAAAGT<br>CATCACTCTTCCATCTCGGCCTTCCATCCAAA<br>TGCAATGATCTTTGTTTTCTAAAACAATGACATA<br>TACTTGTAGTGTGGAAATTAATGATTACTGA<br>CGAGGGAACGAAATCTGTGTTGAGG                                                                               | NA                         | NA                          |
| Ca-II-SNP417 | 54.89                  | Ca- <i>desi</i> -LG(Chr)3 | 3654605                 | TCGCATTTTCGCTACGTTCTTCATCGATGCAAGAGC<br>CTAGATATCCGTTGCCGAGAGTCATTCTATATTT<br>ATGTGTCAAAACACAACCCGCACGAAAAAC | T         | C       | CCCAATTGTGTTCTCCTCTGCGCCAAAACCTCAA<br>ACCCCGACGCTGAATGCGTCAAGGAATTAATA<br>CTTTGTGATGTGCGCACCTGCATGGAACCGGA<br>GAC                                                                                                                                                                               | NA                         | NA                          |
| Ca-II-SNP418 | 55.86                  | Ca- <i>desi</i> -LG(Chr)3 | 3765014                 | AAAATTTCTTTATATAGAGGATTCTACTCGATT<br>ATAAATTAACACTAAAACACTAAATAAATTCGAGTT<br>TTCTCTTTCTCCCTTTTTGCTTTGTC      | C         | T       | ATTATGGCGATTAAAGTACTCGTCGTAATATA<br>GCACTATGACCGCTCGAAAATTTGAATGGACAG<br>TTTTTTTTCAATAAGGAACAAAAAGAAAATTTG                                                                                                                                                                                      | NA                         | NA                          |
| Ca-II-SNP419 | 56.83                  | Ca- <i>desi</i> -LG(Chr)3 | 3879405                 | CGTGTGTGTTATTTGTCTAAGTCTTTTCATCAAAAA<br>ATTCCCCTCTACTCATTTAATTCTCAAATATATTT<br>TAGTATCGAAAAGTTGCTTAGCATTAGG  | G         | A       | AAAAAGGTCAGGTCAGACTAAAAAAAAGTCTA<br>TGATAGACTGAAGCCTAAAAAATAAATCGTAA<br>GACTCAGACATTTCAAAGTCTGGCCTATTCCCA<br>C                                                                                                                                                                                  | NA                         | NA                          |
| Ca-II-SNP420 | 57.86                  | Ca- <i>desi</i> -LG(Chr)3 | 3943513                 | ATTAAGAATTTGAAATTGAATTGGAATTAGAATG<br>GAATCCTCCCTCTTTTTGTGGTTTTATTTTTAT<br>TTATTTTTAATGGTAATTATGATGTGAT      | C         | A       | GTAAGGCAGCACACAGTATGTTGTTAAGGGAT<br>CACAGAAAGAGTTCCACAAGAGCTTCTTGAGG<br>AGTTGAAAATCATCTGTAAAGGATAACATATCAC<br>TTGATTATGACGAGAGATATATCCATGAAAAC<br>CACAAAACAGTTTTACAAGGCTGTTAATATCC<br>CAGATGTGATTGTTTATCCAAGATCTGAAGAGG<br>AGGTCTCCAAGATTGTCAAAGTATGCAACAGTT<br>ATACCATTCTATTCTACCTTATCTCCACCTA | NA                         | NA                          |

| Marker IDs   | Genetic positions (cM) | Chromosomes               | Physical positions (bp) | Flanking sequences/Forward primers                                                                          | ICC 12968 | ICC4958 | Flanking sequences/Reverse primers                                                                                                                                                                                                                                                           | Annealing temperature (0C) | Amplified Product size (bp) |
|--------------|------------------------|---------------------------|-------------------------|-------------------------------------------------------------------------------------------------------------|-----------|---------|----------------------------------------------------------------------------------------------------------------------------------------------------------------------------------------------------------------------------------------------------------------------------------------------|----------------------------|-----------------------------|
| Ca-II-SNP421 | 58.89                  | Ca- <i>desi</i> -LG(Chr)3 | 4071550                 | GCGGGATAGGAGAGGGAGCAGGAATGACACGAG<br>AAGTTAGTATAGTGTGGTGTGCCCACTGTAAGT<br>TTTGTCTCTGCATCAACTACAACACTCAA     | T         | C       | CAGGAGCCATTACACAACGAAATGGCGGTGAA<br>ACTTGGTTTGAAGTTGGACGATCAAAGACATAT<br>ACCCATCAGCTGATGACATTGGTCATGCCTT<br>AA                                                                                                                                                                               | NA                         | NA                          |
| Ca-II-SNP422 | 59.92                  | Ca- <i>desi</i> -LG(Chr)3 | 4112099                 | CCAAAAGCTATTAACCATGTCAATTTTTGGCC<br>TAATGATGTGATTTGTGATGAATCATTATTTGCAG<br>TGTTAGTGTGTTTGGTGTCTCAGCAGAATC   | A         | T       | TGTTACTACCTTAGGCCTTCTTGAGTATA<br>ATCTCTCTGCATTAGTAGCAGAATTGTGGGA<br>CGCTGTTTCCCTTTGAATCATACGAACATTGCA<br>T                                                                                                                                                                                   | NA                         | NA                          |
| Ca-II-SNP423 | 60.95                  | Ca- <i>desi</i> -LG(Chr)3 | 4198788                 | TTCGATTTACAGCTGTGGTATATGTAGTTACTC<br>CTAGTTTTGAATTTACTGGAACTGTTTCTGTTAA<br>ATAATGGTCTGTATGTTGTGACAGAAACG    | G         | T       | CATTGTAGACGCCAATAATGCTACCAATCATCT<br>CAGGCACAATAATCATGTTGCGGAGGTGAGTC<br>CTCAGTGGTCTGGCTTCTCACCAGCTGGGCG<br>CTC                                                                                                                                                                              | NA                         | NA                          |
| Ca-II-SNP424 | 61.98                  | Ca- <i>desi</i> -LG(Chr)3 | 4227862                 | ATAGAGCATTAAAGTTTACTTAATTTTTGGTGAATG<br>ATTTGAAGATTTTGTAGCAATATGAGGCTTCACA<br>AGCTCCTGTTTCATAGAAACATGATCTTT | C         | T       | GAGCAATTTCTCCTAGAGATAACTATGCATCAG<br>TAAGAAGAGAGAACAGAGAGCTGAAACTTGAA<br>GTTGCAAGAATGAGAATGAGATTGAATGATTTG<br>GA                                                                                                                                                                             | NA                         | NA                          |
| Ca-II-SNP425 | 63.01                  | Ca- <i>desi</i> -LG(Chr)3 | 4416213                 | AACTTGTGCTGGATCATGGACTATTCAAGGACC<br>ACAACCTTTGTGGCCCAACATTGTATACGGATACAA<br>AGATATTTGTACCATGTACCCCACTATT   | G         | C       | ATAATATGTTGAATATATTGGTTTTACGCGCAA<br>AAAGTCACGGCAATGTGAAAGCTACAGCTAGAA<br>GCTTCACTATCATCGTACATTTAGAATGGGTG<br>CTCCAATCAATTTACCAAACACATACTTAATCC<br>TGATCCCAAAGTCATGCACGCTTTATAATAAC<br>CAAGTATCCAG                                                                                           | NA                         | NA                          |
| Ca-II-SNP426 | 64.04                  | Ca- <i>desi</i> -LG(Chr)3 | 4441610                 | TCTATTACGCTTCTATATTCATACAGATCTATTGTA<br>TATCTTCAACAAATTTACTCTCACATATCTCTTC<br>TGTGCGAGAATTTGTCATGCGGTTTTT   | G         | T       | ATCAGAAAAATAAATACCTTTTCTCTCCCCCAA<br>AATCAAAACCCTAACCTTCGAAGCTCTCACGGA<br>AAGGCCACCGATCCCATTTCTCACCATCCA<br>AGAAAAAATGAGTAGACATTCGAGCAGAAGT<br>TCTATGTTGGGAATCTACCTGGCGATATCCGTG<br>AAAGAGAAGTTGAAGATTTGTTATGAAGTATG<br>GACACATTACTCATATTGACCTAAAGGTGCCAC<br>CAACAGCTGCTGCTATCAATTTCTACACTTC | NA                         | NA                          |
| Ca-II-SNP427 | 65.07                  | Ca- <i>desi</i> -LG(Chr)3 | 4469690                 | GTCATTGTTCAAACAACCGTTATCTCTCCTGTTTT<br>GGACGCATTTTCTTACTTTGATGATCATGGCTTCA<br>TTTCGTTAGAGTTGCGCTGCTTCTCTTTG | G         | A       | AATTCATATGTGGAAAAGAGACACCACCAGAA<br>TGATCGTGGTGGGAATAAAAGCCACTGTTGG<br>AATCTATTAGTAAAGACTAAATTCATGACAAAC<br>A                                                                                                                                                                                | NA                         | NA                          |
| Ca-II-SNP428 | 66.10                  | Ca- <i>desi</i> -LG(Chr)3 | 4548319                 | TAAAACCATTTGTTTTTCAGCAATTATCTTGAAC<br>TTTTAAGTATTTCAAGCACTTCATTCTTCTCTTGA<br>TTAGATATACCAAATTTTCCCTGTAAA    | G         | A       | GATCTTAAAGATGATGGAGATAATCTACTCTG<br>ATGTTTGGTCCTTTTGAAGAAGTATCAATAG<br>GAGGTAATCATTACTTTGTATCATTATTGATGA                                                                                                                                                                                     | NA                         | NA                          |

| Marker IDs   | Genetic positions (cM) | Chromosomes      | Physical positions (bp) | Flanking sequences/Forward primers                                                                           | ICC 12968 | ICC4958 | Flanking sequences/Reverse primers                                                                                                                                                                                                                                                                                                                                                                                      | Annealing temperature (0C) | Amplified Product size (bp) |
|--------------|------------------------|------------------|-------------------------|--------------------------------------------------------------------------------------------------------------|-----------|---------|-------------------------------------------------------------------------------------------------------------------------------------------------------------------------------------------------------------------------------------------------------------------------------------------------------------------------------------------------------------------------------------------------------------------------|----------------------------|-----------------------------|
| Ca-II-SNP429 | 67.13                  | Ca-desi-LG(Chr)3 | 4631479                 | CAAACCTTTGATGCCCTTTAACATGCATGTGTTGT<br>GTATAGCCAAGTCCAGTTTTAACATTTAGATTTCTT<br>TGATTTCTAAGAAGTCTATCTAAGTTGTT | T         | C       | AGATTAATGTGAAGCATGAGTCTCTTAGAGACA<br>TAAATGAAGAATTGAAAAAGAAGCATGTGCAT<br>TGAAATGTGATGTAGCTAAGTTTAAATTGGGTA<br>A                                                                                                                                                                                                                                                                                                         | NA                         | NA                          |
| Ca-II-SSR124 | 68.16                  | Ca-desi-LG(Chr)3 | 4650196                 | AATCCCTTCACACACACAAAA                                                                                        | (TA)12    | (AT)14  | TGATTCCGTGTTTCTTTTCG                                                                                                                                                                                                                                                                                                                                                                                                    | 57.97                      | 114.00                      |
| Ca-II-SNP430 | 69.19                  | Ca-desi-LG(Chr)3 | 4673307                 | GATTGAGTCAAATTCATGATACTCTTTAGTTCTTT<br>GTAAAATACAATCTTTGTAAGTGAAGGTTTAGAA<br>AATCCAGTTTGAAAAGTGGTGGCTATCTT   | T         | C       | CTCTCTATGCTATTCGGCGACCACTGTATCC<br>CAGAGTTCTCTACAAACTCTTCCAAGATCACA<br>GTAAAACCTCTTCTTGATGAGTCTCTCAACAA<br>C                                                                                                                                                                                                                                                                                                            | NA                         | NA                          |
| Ca-II-SNP431 | 70.22                  | Ca-desi-LG(Chr)3 | 4785882                 | CCAAAGAAGCTCTTTCATATGCCTCCAGGATACT<br>TTTTTTTCCAATCCCATACAAGTGTAAACACATA<br>ATCGGTGTTCCACATGGGCCTCAATGTTG    | A         | T       | CAGGGATCAAATCAACATGAAAGAAAGCCGTAT<br>ATTGTCTACATGGGAGAACTACCAACTGCAACT<br>GCAACAACATATACTACGGAACAACACCACCAC<br>AACATGTTGGAGACTGCGATTGGAGACAAGCA<br>GTTAGCAAGAGAGTCCAAAATACATAGCTATG                                                                                                                                                                                                                                     | NA                         | NA                          |
| Ca-II-SNP432 | 71.25                  | Ca-desi-LG(Chr)3 | 4832402                 | TAGAGTTCCAAATAAAATTAGGGTTTCAATGAATA<br>CCGGCGGTGACGAATCGGCATTGTACTGCATAC<br>GCTTGTGAGCACGGCCACGTGGCTTCTTCTT  | G         | C       | GTTTGCACGGCTTATTTAAGACTTGAGGTC<br>TTCTCTAGTTCGGTGGTATCATAGCAGGATTA<br>GAGGATAAAACTGTAAGTGTGCTGGAATTAGT<br>GGAGTAACATCAACAGTCAAGTCAATTCGCCG<br>ACCAAAGAGCACTTCTCCAATAACTGAAAGAAA<br>CCGGTTGCCTGATATTCAAAAGAAAAGCTGCT<br>TTTAATATTGTAAGAAGGAAAGGACTGGCTG<br>ACAAATCAACAGCATCTTCAATAAAGACTTT<br>GCCAAGGGAGAAATGAGTGGTACTTGGACTC<br>AAGTTGTTGACACATATGACGGGAAGAAATGA<br>TTGGTTGCGTGAATATCAATCAAGCCACGTGAAG<br>TA            | NA                         | NA                          |
| Ca-II-SNP433 | 74.34                  | Ca-desi-LG(Chr)3 | 5774493                 | CAACACATCTTTGATCAAGGAATGACCACCATCCC<br>TTCTTATGATCAAAACATCCCGATACCGTCCGGCC<br>GCTAATGTCGTGTCATCCGCGAATTTCACT | A         | C       | GCCAAGGGAGAAATGAGTGGTACTTGGACTC<br>AAGTTGTTGACACATATGACGGGAAGAAATGA<br>TTGGTTGCGTGAATATCAATCAAGCCACGTGAAG<br>TA                                                                                                                                                                                                                                                                                                         | NA                         | NA                          |
| Ca-II-SNP434 | 75.37                  | Ca-desi-LG(Chr)3 | 5913806                 | GTCTCTCGTTAATTTTAGGGAGCATCTCCAGCAG<br>AAATGATGATGATTATGATTGGGCATACCTCTA<br>CTCGACGTGCATATCAACTATCTAAAACATA   | A         | G       | CCCTTTTCAACGCGTTTTTCTTTTATCCATTCTT<br>CGCTTCTTCATCGCCTTCATCACAAATCATCTAT<br>TATGGATTAATTCTCATTATAGATTATCTATTCC<br>TATTCTTCTTTATAGATCTATTTCCGATGTTT<br>TTCGATCTCGATCGTTACGATCGAACAGAGA<br>GTTTTCGATTTTTGTTCTTTTAAACAATTAGGG<br>TTTTCGACGACACAAAATGATGCCTACCGTGC<br>CGCTTCCACTCTTCATTTTACCAATTTACTTC<br>GCGTTGAGACTTACAAGATTTACATCTTTAAGG<br>TCTTGAAGCAGGTTCCACCCTGATATCGGGATCT<br>CCAGCAAGGCTATGGGAATCATGAACAGTTTCA<br>T | NA                         | NA                          |
| Ca-II-SNP435 | 76.40                  | Ca-desi-LG(Chr)3 | 5916065                 | ATCTAACAGCGTTTTGGATCTCCCGAGAAGTAATT<br>GTAGGTTTTTTGTTATACCTAGCCAAACGGGAAGA<br>TTCTTGAGCGAGTTTCTCGAATATATCGTT | G         | A       | GCGTTGAGACTTACAAGATTTACATCTTTAAGG<br>TCTTGAAGCAGGTTCCACCCTGATATCGGGATCT<br>CCAGCAAGGCTATGGGAATCATGAACAGTTTCA<br>T                                                                                                                                                                                                                                                                                                       | NA                         | NA                          |



| Marker IDs   | Genetic positions (cM) | Chromosomes      | Physical positions (bp) | Flanking sequences/Forward primers                                                                           | ICC 12968 | ICC4958 | Flanking sequences/Reverse primers                                                                                                                                                                                                                                                       | Annealing temperature (0C) | Amplified Product size (bp) |
|--------------|------------------------|------------------|-------------------------|--------------------------------------------------------------------------------------------------------------|-----------|---------|------------------------------------------------------------------------------------------------------------------------------------------------------------------------------------------------------------------------------------------------------------------------------------------|----------------------------|-----------------------------|
| Ca-II-SNP436 | 77.43                  | Ca-desi-LG(Chr)3 | 6090281                 | TTTTAGTTTTGGCAGTTATGATCTATAATGGGCAT<br>GCGGTGTCCCAGTGTCTATGACGTGGCTGTCCT<br>CTTGTGGTTAGGTACACACAGACAGGCACA   | T         | G       | TTGAATATAACTAATGGAAGTAAATTAAGGGA<br>TAAAAAATGAAGAGACTAAAACACAAGAGCAC<br>ATGTGATATATAAAAGCCAAGGAGTGTAAGCA<br>C                                                                                                                                                                            | NA                         | NA                          |
| Ca-II-SNP437 | 78.46                  | Ca-desi-LG(Chr)3 | 6159447                 | CTATTTCAAGTTTCTTGCTGGAAGAAAATTCTACT<br>TCGTA CTCTTCGTTGCTTGTATTACTCCTTCACA<br>CCACTCCTCAATCAGCTCCTCCAGGTAGTA | G         | A       | AGCTGCAGTCTGCATTGATGCTACATATAAGAA<br>AATGGTCAGAATAATTGCTTCAGTTATGAAC<br>AGTAGTGTATGGTTATAGGTACAAACCCAATG<br>A                                                                                                                                                                            | NA                         | NA                          |
| Ca-II-SNP438 | 79.49                  | Ca-desi-LG(Chr)3 | 6259404                 | ACAGTTGTTCAAATCTGAGACTTTAATTCTAAAAT<br>TATTGTGACTGATAGAGATCTTGCCATGATGAATG<br>CGATTAGTGTGTTTCTACTTCAATA      | G         | A       | CAACACAAGAGTCACTGAGTGAGTGAAGCGTT<br>ACACCCAAAAAATAAAACCTTCCATTTCCCTA<br>ACCTTCAAATCAAATTCGTAATATCAAATTA<br>CACTCTTCGATTTCTCACATCTTAAACAATCT<br>CTTCTCGATTCAAACCTAATCAAATAAAACCTC<br>AAACACCTGTAGATCTGTACAAAACACCTCTC<br>ATCCTCCTCAAATTTCTCCTCAAATTTTCTG<br>TCAAAATCCCAACCTACCAATTTTTCGGC | NA                         | NA                          |
| Ca-II-SNP439 | 80.52                  | Ca-desi-LG(Chr)3 | 6298304                 | TCCTACTCTGAAACAATATTCTCTGAATGCCCTAC<br>TTTTTCGTTCCCTCAGGAAGTCGTTCCCTGGGGAA<br>GCGACCTCTTGAAGAGGAAATTTTTAATG  | C         | T       | TAAATTAATAATTCTAATAATAAACTAACTTTGA<br>AATATAACAAAAAATAAAACCAAACTAGTGG<br>GAGGTGCTTCCCGGAAACGACCCCATGTT<br>A                                                                                                                                                                              | NA                         | NA                          |
| Ca-II-SNP440 | 81.55                  | Ca-desi-LG(Chr)3 | 6427132                 | CTCATGTGTTTGCAAAAGTTTATTTTTAAAGTGC<br>GAACGTTATGCATGCAGGTATCTTATTGTTTCAT<br>AATCACCTGTCTCAAGCAAGGAGGGTCCC    | T         | G       | ATGAAACACAAGCATAAAATAAAAATCAAACA<br>TTAAAAAATCAAAGCCTTAAGAAATACTCCGTA<br>GCGGGACAAAGAGGCCCTCAAATATGAAAAG                                                                                                                                                                                 | NA                         | NA                          |
| Ca-II-SNP441 | 82.45                  | Ca-desi-LG(Chr)3 | 6541733                 | TGGTTTGTCCATCAGACCAATGAGTTATGCTATGT<br>GTTTGTGTTGTTCTGCCTAATTTGTTATTGCGTGT<br>GCAATTGCTTGACATTGTGTGAAATTGTCT | A         | G       | ATTGAAACAACAATAAGAAAATGACTCACAAA<br>GTTTTAAACAATTCATATAGTTTTATAACAATTT<br>CACACGACTACGTGATATATAACACACAAACAT                                                                                                                                                                              | NA                         | NA                          |
| Ca-II-SSR125 | 83.35                  | Ca-desi-LG(Chr)3 | 6739764                 | GGTGAACAACCTCAAACCTTGG                                                                                       | (AG)6     | (AG)7   | TCCATCAAACCTACTGTCCA                                                                                                                                                                                                                                                                     | 58.65                      | 142.00                      |
| Ca-II-SNP442 | 84.25                  | Ca-desi-LG(Chr)3 | 6811546                 | TACTCTTGTCCTGTTTGTGCCAAATACAAGAA<br>CCCAAATGCACCAACTATAGCCCGAGTTTCCCT<br>GCTGCTGATGATATCCATGACAAGTAGATC      | G         | T       | AGGATTTGTTGCATTGTATTCATTGACCTTCTT<br>CTTTGCAAAATTTGGCCAAATGCTACCACGTT<br>TGTTGTGCCCGCAGAGATTTTCTGCTAGATT<br>T                                                                                                                                                                            | NA                         | NA                          |

| Marker IDs   | Genetic positions (cM) | Chromosomes      | Physical positions (bp) | Flanking sequences/Forward primers                                                                  | ICC 12968 | ICC4958 | Flanking sequences/Reverse primers                                                                                                                                                                                                                            | Annealing temperature (0C) | Amplified Product size (bp) |
|--------------|------------------------|------------------|-------------------------|-----------------------------------------------------------------------------------------------------|-----------|---------|---------------------------------------------------------------------------------------------------------------------------------------------------------------------------------------------------------------------------------------------------------------|----------------------------|-----------------------------|
| Ca-II-SNP443 | 85.15                  | Ca-desi-LG(Chr)3 | 6830375                 | TTCCCGATTTTGTAAATCAGTCTCACAAAACATCGATTGCGCATTCAATTAAGCGTTGGATCGGGCTGATTTTTGGACAGAAGGTTGCAAAATTCAGG  | C         | T       | ATCACCGAGACAAAATAAATTAGGGATAATCTGTGCTGTGCGAGCCCGATTTCCTCCTACAGACGTCGTTTCGCCGATCCGACCGTTGAAGACGAAG                                                                                                                                                             | NA                         | NA                          |
| Ca-II-SNP444 | 86.05                  | Ca-desi-LG(Chr)3 | 6859122                 | GGAATTAGCATATAATTTAATTGCCTTAACCTAAATTTCCGGAATGATATTGCACCTACTAGTTGTGGAGCGATTAAGTTCATGATTGACCCGAA     | C         | T       | TATGATTAATAATATTAATTTAAATCTACGACATTTGATTTTGATCAAATGGCTACTAATATCTCGACTTTAAGAATGCAAAAATCCCTGCTATAGGA                                                                                                                                                            | NA                         | NA                          |
| Ca-II-SNP445 | 86.95                  | Ca-desi-LG(Chr)3 | 6877359                 | AACACGAAGTAACATATCTTGTTCACCTTGCTGCAAGGACCACCCCGAAAGGCTTCATTGTCTTTCTATGCAACTAACTTCTGATTACTTTGCCCTGAG | A         | G       | CAACCACCGCACATGCCAGAACATTGTCAGAGAAGACAGCATAATGATGAAGTTCCGTATCATGATCTTATTTTCATTTGGCAGCTTCTATCCTCGGG                                                                                                                                                            | NA                         | NA                          |
| Ca-II-SNP446 | 87.85                  | Ca-desi-LG(Chr)3 | 6921110                 | TAATGTATTGGACAGGTGAATATTCAGAAAGGGAAAGGTACAATGGATCTGAATATGCTCCTACTATTGAGGACAAGGATGGTATTGGATGCTTGTGG  | C         | A       | ACTAATTAATTTACTGATTTAATTAAGAAGAGCTGATTTAATTTATATATGATGATGAGGGGAGAAATCAATTAAGAAGTACTTCCATGGAACATC                                                                                                                                                              | NA                         | NA                          |
| Ca-II-SNP447 | 89.65                  | Ca-desi-LG(Chr)3 | 6978618                 | CCCCTAAAGTTGACACTAAATCTGGGTGCACTCAAAGTATTATTGACCTTTACCTACAGTTATAACTTTAGTGACACATTTTGCATGTCACGATAC    | A         | G       | TTCGGAAAACCTATGGTTTTAAATTTTTCAGTAAATGGTTGTGTTTCGAAAATGTTGAATTTATTTTATTTTTATTATAGTTCACTACAAAAAATTGA                                                                                                                                                            | NA                         | NA                          |
| Ca-II-SNP448 | 90.55                  | Ca-desi-LG(Chr)3 | 7029469                 | TGACTTACTCGTACAAGAAGGATTTGATTTGTTAAATCAGGAGGTAGATAGAGCATATCTTGTCTCCAATGCTTCTTCTCTTACAAGTGTGTTCTC    | C         | T       | CTCAGAAATTTCAACTCTCTATTTATTATAATATAAATAAATCGCATGATTGATAATTATTATTATAGAAAACATAATCATGTGGATCAAAAAGAAG                                                                                                                                                             | NA                         | NA                          |
| Ca-II-SNP449 | 92.35                  | Ca-desi-LG(Chr)3 | 7114370                 | GTATATAGACCAATTGATGCAGACTCAACCTAAACCTATGTGGCAACTCCTTTTATTTCAACATATTTCTAGTCGTGCTAGGATGGTCTATTCT      | T         | C       | AATATACATCACATGAGTTTGAAGAAATTTGTATCAAAAATGGGATTGAACATCAAGTACTGCCTCATATACACCTCAACATAATGGATTGGTTGAAAG                                                                                                                                                           | NA                         | NA                          |
| Ca-II-SNP450 | 93.25                  | Ca-desi-LG(Chr)3 | 7207094                 | ACAGTTGTTCAAATCTGAGACTTAAATTTCTAAAATATTGTGACTGATAGATCTTGCCATGATGAATGCGATTAGTGTGTTTCTACTTCAATA       | G         | C       | TAATAATTGTCTGTTAAAATGACGACGGTTCCTGTATTAGCGGTGCCAATTTCTGTCCTTCCGACGACCTTGTCTCCTCTTCTATGTCTAACAACTCAGTCTCACAAACCATCATTTCTGCAATCCCATTTCTCAAATTCGTCAAACAAGAAAATAACCGTAGTAGTGTGGTGTGAATCCCAGTAACTCAAGACAAGAAAATCCTCTCTTCTGGACGAAAACATACCTCTCCATCAGATCCATCTTACCTCAA | NA                         | NA                          |

| Marker IDs   | Genetic positions (cM) | Chromosomes               | Physical positions (bp) | Flanking sequences/Forward primers                                                                            | ICC 12968 | ICC4958 | Flanking sequences/Reverse primers                                                                                                                                                                                                                             | Annealing temperature (0C) | Amplified Product size (bp) |
|--------------|------------------------|---------------------------|-------------------------|---------------------------------------------------------------------------------------------------------------|-----------|---------|----------------------------------------------------------------------------------------------------------------------------------------------------------------------------------------------------------------------------------------------------------------|----------------------------|-----------------------------|
| Ca-II-SNP451 | 94.15                  | Ca- <i>desi</i> -LG(Chr)3 | 8442587                 | CTATTTTGGAACTTTTGCTAGGAAGGAATCTTGTA<br>TATTGGAACAAAAGGCTTTGTGATTATTTTATATTT<br>TGAAATATTTGCTCACAAATATATATTTTG | C         | T       | ATATACTTGAGAAAATTGTTATGCTACTAAATAA<br>ATATATATTATAAATGAGCTAAAAATATATATT<br>ATTAATAAGCAAAAACGTATATTATTAATGA                                                                                                                                                     | NA                         | NA                          |
| Ca-II-SNP452 | 95.05                  | Ca- <i>desi</i> -LG(Chr)3 | 8518037                 | AGGGGCAAGCATAAACTCATACTGAACTGAGTT<br>CACGTTCAACAACCTACGTGAACTGTGTTACGTA<br>CTTGAACCTCATCACCTACGTGAATTGAGTT    | C         | T       | AACTCAATTAACGTAGTCTGATGGAGTTCACGT<br>ACGTGAACTCAGATCACGTAGGTGGACGTGAA<br>CTCAGTTAACGTAGGCTGATGGAGTTCACGTA<br>CAC                                                                                                                                               | NA                         | NA                          |
| Ca-II-SNP453 | 95.95                  | Ca- <i>desi</i> -LG(Chr)3 | 8807727                 | CATTTCTCTTTGGATGGCTTCTTTCCAAAAGGAAG<br>AGTCTTGAGACTTTATTGTCTCTCATATGTGTTT<br>GGGTCACTCTCTAAATTGTAGCAAATGGT    | T         | C       | GAACCCAAAAGAAGTAAAAGAGGCAGAAAAGA<br>AAAAGATTATGGCTAGACTTCTTTATGTTCTCT<br>GTAGAAGGTACAAATGATTCCAGTAACAGTTAT<br>G                                                                                                                                                | NA                         | NA                          |
| Ca-II-SNP454 | 96.85                  | Ca- <i>desi</i> -LG(Chr)3 | 8974312                 | ACCATTGCCACGAGTTTCTTGTGTTCTGTTTCATCT<br>TTACTTATTGTAGCTATTAAGTGGCCACCATAGTC<br>TCCCTTCAAGAAACATGCATCCAACCCAAT | G         | A       | CTATAAAGGCTGAAATTAATGTGGCTACAATGT<br>TGATTATGAATCCTATTCCCATCTTTGTATGCA<br>TGTGATCCAGAAGGATTGTTGTGAATCTACG<br>AGTGAACGGGACGAAAAGGCGTTTCGTATAGAA<br>TAACTCCTATCATTGTAGTTATGACACTGAAAAT<br>TGACATGTTGGCTGGTGAAT                                                   | NA                         | NA                          |
| Ca-II-SNP455 | 97.75                  | Ca- <i>desi</i> -LG(Chr)3 | 8989700                 | GTTTCGTATAGAATAACTCCTATCATTGTAGTTATG<br>ACACTGAAAATTGACATGTTGGCTGGTGAATTTG<br>GAATGAGTGAGAGAGGTGACGATCCATTGT  | T         | A       | AACTAAAATCAATCATAAGAATCCTTCCAATTTT<br>ATCATCAGGAATATTACTCATAGCTGCTTCAGC<br>ACACCTACCTAGTTTCGTCTATTGAACAAGCTCG                                                                                                                                                  | NA                         | NA                          |
| Ca-II-SNP456 | 98.65                  | Ca- <i>desi</i> -LG(Chr)3 | 10086662                | TTGGAACTATTTCTCCATCCTCGGAGTCTGATCC<br>TTGAGGGATCAAGAATTGGCAATTTTAGTCGAAT<br>CATTTTTATCATTAGCCTTGCTGCTCCCAT    | T         | C       | TTCAACACACGTCAAAGGATGCAAGTAATAAAA<br>GTACAAAATATCAAGATGAAGGAAGATCCACC<br>AATATGGTAGATGCAAATTTGTATGTTCTAAAG<br>GAGAAGATAGAGATGGTGAAGGTGAAGGAAAAG<br>ATTGGAAGGTGTTGCAAATGTCAACATGTTG<br>GAATTATGTCCTACTTTCTATTAAATGATTACAA<br>AAAACCAAAAGAAAACAAGAATTGAACAACCTTC | NA                         | NA                          |
| Ca-II-SNP457 | 99.55                  | Ca- <i>desi</i> -LG(Chr)3 | 10106267                | AATCCATGTATGGCCTCAGACAAGCATCGCGACA<br>ATGGTTTTGCAAGTTCTCCACCACCTTGCTTGCTC<br>ATGGTTTTGCTCAGTCTAGAAAACGATTATTC | C         | G       | GAGTCTCAACAATTTTGTGGAATCTGGGCCTG<br>TCAACACAATATCATCTACGTAAACAAGTAGAA<br>TGATCAGGGAGGGATCTGAACCAAGTAATAA<br>AA                                                                                                                                                 | NA                         | NA                          |
| Ca-II-SNP458 | 100.45                 | Ca- <i>desi</i> -LG(Chr)3 | 10384363                | ACAAGTTACATAGTTTTTTACAATTAAGTGCTATGT<br>GAATTTGTTGTGCTTTGCTGATTGCAATGTGAA<br>TTATGCTTTTTCTTAACTCTCTGATTTT     | C         | G       | TGTTTCGAAAGAATCTGAATTTAAATATTGGTC<br>GGAATAATTTTTGTGACTATTTACCTCTCGA<br>TCAAATTTCTGATTGTGAGAACCCCAACTCT                                                                                                                                                        | NA                         | NA                          |

| Marker IDs   | Genetic positions (cM) | Chromosomes               | Physical positions (bp) | Flanking sequences/Forward primers                                                                          | ICC 12968 | ICC4958 | Flanking sequences/Reverse primers                                                                                                                                                                                | Annealing temperature (0C) | Amplified Product size (bp) |
|--------------|------------------------|---------------------------|-------------------------|-------------------------------------------------------------------------------------------------------------|-----------|---------|-------------------------------------------------------------------------------------------------------------------------------------------------------------------------------------------------------------------|----------------------------|-----------------------------|
| Ca-II-SSR126 | 101.35                 | Ca- <i>desi</i> -LG(Chr)3 | 10464064                | TTCCCCACAAATTGAAACTACA                                                                                      | (TATT)5   | (TTTA)5 | CTCTCTCTGCACATCTCCC                                                                                                                                                                                               | 59.36                      | 201.00                      |
| Ca-II-SNP459 | 102.30                 | Ca- <i>desi</i> -LG(Chr)3 | 10490580                | CTCCCCAGAATGTTTTAGGCAGCCCTACACTCAA<br>GATCATACTCTGACCATTCCAAGATTGTTATGT<br>TCATCCTTTCAGCAATACCATTTTGTCAAGG  | A         | G       | AATGTTTAAAGACTGACAATGGCCTGAAGTATC<br>TTTCAGAGCAGTTTAATAAGTATTGTAAGGACT<br>TAGGTATTCAAAGACATAGAACAGTTGCAGGTA<br>C                                                                                                  | NA                         | NA                          |
| Ca-II-SNP460 | 104.20                 | Ca- <i>desi</i> -LG(Chr)3 | 10590044                | GGAGGGAGAACGCAAGCTAATTGATCACCACACA<br>CGCGCGCGCCCGTCCATCCGGCCTGGCCTGG<br>CTTGGCTTTTGCTTTGTGGTGTATTATTTTT    | T         | G       | ATATGACTAGGTGGAAGGCAGTTACGTAATTA<br>CGTTTCAATTAGAGATGGAACGCAAGTAAATCAG<br>ATAATTAATTAATAATTGATTAATTAATTTTCAGG                                                                                                     | NA                         | NA                          |
| Ca-II-SNP461 | 106.10                 | Ca- <i>desi</i> -LG(Chr)3 | 10664843                | ATATTGATGAATTAGGTTATTCCTCTGACTTATG<br>GTCAAGTCATACATATACCGTGTATGTTTGGTTTC<br>ACCGTGAGAATGGCAAAATCCCGGCGACTC | A         | G       | GGGGGTTTCTTAACAGTATGATGCCAATTAATG<br>TTATATTTGCCTGTAACAAAAGGAGTATATGC<br>TTAGTTAGTTTCACGGTGGGATTACAAATCATG<br>G                                                                                                   | NA                         | NA                          |
| Ca-II-SSR127 | 107.05                 | Ca- <i>desi</i> -LG(Chr)3 | 10687153                | GAAGATGTGGGGACTACGA                                                                                         | (AAT)19   | (AAT)15 | GGAGGAGAAGAAGAACAAGAAGAA                                                                                                                                                                                          | 59.93                      | 232.00                      |
| Ca-II-SNP462 | 108.00                 | Ca- <i>desi</i> -LG(Chr)3 | 10723365                | TGTTCCAAAATATTTTTGGGAAGAGTTGTCCTCA<br>CATCAACATATCTTATTAATCAATAACCTTCTAGAG<br>TCTTGGGGTCCAAGAGTCTATGGATGTT  | A         | T       | GAAAATGATAATGGACATGAATTTGATGATGAA<br>AAAAGGGAAATTGCTCAGAAAAAGTTTGAGCAA<br>TCTCATGTCAATCAAAAATGTGACACAACGTAA<br>TGGTGGTTTTATGGTACATGATTATGAATTCTC<br>TTGTAGTAATAGCCCAAATCCTGTTTTTTTCAAC<br>ATGCCAAAAGGAAGCACCATTTC | NA                         | NA                          |
| Ca-II-SSR128 | 108.95                 | Ca- <i>desi</i> -LG(Chr)3 | 10755951                | AAAATAGAGTCGTTGGATTCAAAA                                                                                    | (AT)11    | (TA)11  | TTATGTTATCAAAATCCGTCAAAA                                                                                                                                                                                          | 58.33                      | 142.00                      |
| Ca-II-SNP463 | 109.90                 | Ca- <i>desi</i> -LG(Chr)3 | 10776247                | TACATAGATTGACTAGAATTGTCTGTAACATTTGG<br>ACAATATTTTTAGTATGACTATTTAACCGACATAG<br>TCCGCATTTTTTGCACATTTTTTCTCTAA | C         | T       | AGAATGATATTGTCCTTTGAAACAGTGTATCA<br>CAACTACTGAAATGCGAATAATTAACAAGTCCG<br>TCCAAAATTGTATTGATTAGAACTGAAATGGA<br>C                                                                                                    | NA                         | NA                          |

| Marker IDs   | Genetic positions (cM) | Chromosomes      | Physical positions (bp) | Flanking sequences/Forward primers                                                                          | ICC 12968 | ICC4958 | Flanking sequences/Reverse primers                                                                                                                                                                                                                                                            | Annealing temperature (0C) | Amplified Product size (bp) |
|--------------|------------------------|------------------|-------------------------|-------------------------------------------------------------------------------------------------------------|-----------|---------|-----------------------------------------------------------------------------------------------------------------------------------------------------------------------------------------------------------------------------------------------------------------------------------------------|----------------------------|-----------------------------|
| Ca-II-SNP464 | 111.80                 | Ca-desi-LG(Chr)3 | 10809526                | GATTTAAAGGCTTTAACATTTATATGCAGATAG<br>AGATATAGCTTTAACATTTAGATTCTTGTGATGTG<br>CTCTCTTCTCTCACTGGTCATTACATTA    | C         | G       | GTGTGTGTGTGTGACAGTGAAATGATAAAATAT<br>GAGTTTTAGAAGTGGAAGAAAATGTTTTCTAAA<br>TATTGCTTTTGGAGGTTAAAAAGGGAAAAAAGG<br>T                                                                                                                                                                              | NA                         | NA                          |
| Ca-II-SNP465 | 115.60                 | Ca-desi-LG(Chr)3 | 11051176                | CTGTTGGTGTGGCAGCTTTGCCATCTGGAGATCC<br>TGTTTCGGAACGAAGAGGAAGTTGGAATATCTT<br>GAAATGCAAGAGGAGCTAATCAAGGTTAATTT | G         | T       | CAATCACTTTAAAAATATAATAATAGAAAATGG<br>AAATCACCACACTCATGCCTCTTCGCAAAACAT<br>AACTATCTCAGATGATGGCAAATGTGATGCATA                                                                                                                                                                                   | NA                         | NA                          |
| Ca-II-SNP466 | 116.55                 | Ca-desi-LG(Chr)3 | 11138620                | TTGTTCAATTTTTAGATTGGCCAGCAAAGATGAC<br>AAGGGTGGACATTGATATTATTTGTATTGATTTTG<br>TATAAGGACATTGGTCATTTAGTTTAAGAT | T         | C       | ACTCCACCAATTTATAATTGAAATGCAAATATAT<br>TTATAATTTTAAACCATTAAAATGTAACCTAATAT<br>ACATTGTACATTGATTTATAAAATCTAAA                                                                                                                                                                                    | NA                         | NA                          |
| Ca-II-SNP467 | 117.50                 | Ca-desi-LG(Chr)3 | 11161639                | TGTTTTGTGTATACACTTGTCTGATTTTGAAGAA<br>CTTGATTATGTTAAACTGATTTGGTTAATATTGAGT<br>TTGAAGGAGAACAATTTATGTTTGGATAT | C         | G       | ACATTATGGCATAAGATATGGTATATAACATTAT<br>GGCATCATTTGGTTCATGTAGCCGAATCAACTT<br>AGTGGGATAAGGCTCAGTTGTTGTTGATGATA                                                                                                                                                                                   | NA                         | NA                          |
| Ca-II-SNP468 | 118.45                 | Ca-desi-LG(Chr)3 | 11201949                | TGGTTTGCCATCAGACCAATGAGTTATGCTATGT<br>GTTTGTGTTGTTCTGCCTAATTTGTTATTCGTGT<br>GCAATTGCTTGACATTGTGTGAAATTTGCT  | A         | G       | TTAGCATTATGCTTTCCAGTCTGTTGAAAAC<br>TCAAATTTGGCCTTTGGCATACAATTAGCATCA<br>ATTTTTTTGATAATAACGTGTTCCGGGATGGAA<br>TTCTAGATTGAGCTGCTAATTTGGGTTACTCG<br>GCTAGGGTTTTTTGAGTCTCCTATGTGTTCCGG<br>CTCCTTTTGGCCTATCTTGCCTGGGACCCTCAG<br>ACTTTGGTCAGAGCAATCGGGCTACAGTGAAT<br>CTCAAAAGCCGACCTAATGACCCCTCTTCC | NA                         | NA                          |
| Ca-II-SNP469 | 119.40                 | Ca-desi-LG(Chr)3 | 11267039                | CACATTTAAAACTTTTTCTATTAATGGTAGGGGC<br>GTACAAGACCCGGTTCGTCCCGCAATCCGACCT<br>GACCATAAGCAACGGGTTGTGTCTGACCCG   | A         | G       | TGATTTTGGGATGGGACAAGTAACCCGGAGG<br>ATGACTCAAACCCGATCATTTTTTTACCTTGCT<br>ATGTCCTGTCTTTTTTTGTCCTTGTTTTTTTTA                                                                                                                                                                                     | NA                         | NA                          |
| Ca-II-SNP470 | 120.35                 | Ca-desi-LG(Chr)3 | 11294090                | GGTAATTCCTTTTCTCTGTTTTATGTCTTTCTT<br>TTGTTTGGTTTAACTGTTTACTATTTAACGGTCAA<br>TATTATTGGTCCCTGTTCAAAGTTTAC     | A         | G       | TTAAGTAGCATTAAAGAATTTTTATAATTCATT<br>CATGAAATTCACATTAACCATCATATGGCTATC<br>AAGACAAGAAGATGTTTTATATCCAACCTGTC                                                                                                                                                                                    | NA                         | NA                          |
| Ca-II-SNP471 | 121.30                 | Ca-desi-LG(Chr)3 | 11306404                | AAATATTAATTTTTGTCTTTTCTTTGTCCGTAAT<br>TGGATGGTACGTACACTTGCATGTGTCTGTATG<br>TTTAAACGGCAAATTTTACTCAAAATAA     | T         | C       | GTTGCAACAAATATGTGGGAAGTGACGTTGACT<br>TTATCTTAATTCATTGTTGGAAGGAAAACTCA<br>TAAGTTGATAAACTCATTGCAATGATTTGCC                                                                                                                                                                                      | NA                         | NA                          |

| Marker IDs   | Genetic positions (cM) | Chromosomes      | Physical positions (bp) | Flanking sequences/Forward primers                                                                            | ICC 12968 | ICC4958 | Flanking sequences/Reverse primers                                                                               | Annealing temperature (0C) | Amplified Product size (bp) |
|--------------|------------------------|------------------|-------------------------|---------------------------------------------------------------------------------------------------------------|-----------|---------|------------------------------------------------------------------------------------------------------------------|----------------------------|-----------------------------|
| Ca-II-SNP472 | 122.25                 | Ca-desi-LG(Chr)3 | 11324258                | ATACATTTCTAAGGCATCATCCTTCATAATCACCT<br>GAAATCCTTTCTGAATTAGTTGTCATATGCTCAAC<br>AAATTGTTTTCTATTCTTGGCACATACAAC  | A         | G       | AGCAAGGTCAAGTTTGCTGATGACAGAACCTTG<br>AAAGCTGAGGAAGTTGACAACATAGTGATCAAG<br>AGAAGAAATGGCAAACACGGGTGATTGAAAT<br>G   | NA                         | NA                          |
| Ca-II-SNP473 | 123.20                 | Ca-desi-LG(Chr)3 | 11391242                | TGGCCAGAGGTGTCACACGGGGTTGGTGGAGGC<br>GTGTGGGTCTCACGCCAAATAAGGAGGTGGCG<br>CGTCCGTATGAGTTTGGCAGCGCAAAAATGTCA    | C         | T       | CCCTTCCTTTCTTTTTTTTTTTTTTTCTTCTCA<br>AAATTCTGTGTTCCAGCTGTGCCACCCACCACC<br>ACAGACCACCGCGCAATCTACGGCGAGCACC        | NA                         | NA                          |
| Ca-II-SNP474 | 124.15                 | Ca-desi-LG(Chr)3 | 11437128                | GTGTAGAGGACCCGGGCTTTCAAATATAACTGAA<br>GAACAGATACTCTGGTTCATACTTTTGAGCTAGA<br>TTTTATTTTGGATGCATTATTCAAATTAATG   | T         | A       | CTTTAAAGATGAAGCTGAGGAATATGCATATT<br>TCATCAAGGCAAAGGAATGAAAACACTCATCAT<br>GGAGTTGACTATTCAAGCAAAATGTTCAAGTCAG<br>C | NA                         | NA                          |
| Ca-II-SNP475 | 127.95                 | Ca-desi-LG(Chr)3 | 11485180                | GTCTCTTCGTTAATTTTAGGGAGCATCTCCAGCAG<br>AAATGATGATGATATTATGATTGGGCATACCTCTA<br>CTCGACGTGCATATCAACTATCTAAAACCTA | T         | C       | TTATTTTTTGGGTCTGATTGTAATATGCGGTCT<br>TCTTAGCAGATATGGTTGTTTGGGATTTTTTT<br>GTATAAATATACTGTAGTTGCAATTTAATTTTA       | NA                         | NA                          |
| Ca-II-SNP476 | 128.90                 | Ca-desi-LG(Chr)3 | 11517067                | ACAGTTGTTCAAATCTGAGACTTTAATTTCTAAAAT<br>TATTGTGACTGATAGAGATCTTGCCATGATGAATG<br>CGATTAGTGTGTTTCTACTTCAATA      | G         | C       | TTTTCCATAAATTCATTGCTTCTTGTCTAT<br>CCTTTTTCACATATTGTTGCATTTGCCCAAC<br>ATTTTTTCAATATGAAAACGCATAGCAAAT              | NA                         | NA                          |
| Ca-II-SNP477 | 129.85                 | Ca-desi-LG(Chr)3 | 11540671                | ATTAAGAATTTGAAATGAATTGGAATTGAAATG<br>GAATCCTCCCTCTTTTTTGTGGTTTTATTTTTAT<br>TTATTTTTAATGTAATTATGTATGTGAT       | T         | A       | TTTTATCTTTTGTACAGAATCCTTAATACATA<br>AGCACTTACATAATTAGTGCTTATTATAAGCCCT<br>TAATCAAGTTGTTCAATTCACAGTTACCACC        | NA                         | NA                          |
| Ca-II-SNP478 | 130.80                 | Ca-desi-LG(Chr)3 | 11719694                | AAGTTGGAAGTTGAGAAGATTTGACTTGTAGGTCA<br>ATGTGTTGTAGTACCTCAACGGTTTGTAGATTCA<br>GAATGGAAGTTGAGAAGACTGACTTGTAGG   | A         | G       | TAGTTCACCTACCAATGTGGCAGCTACGTCTAAT<br>CCTTCACATAATCCCCTCACATAGAAGGATTT<br>ATCCACTAATCAAACCTAAATTACAACACCTGA      | NA                         | NA                          |
| Ca-II-SNP479 | 131.75                 | Ca-desi-LG(Chr)3 | 11802421                | TTGGAATCACCAGTTAAGAATGCAGTCATTACTGT<br>ACCAGCTTATTTCAATTATCTCAGAGAAAAGCCA<br>CCATAGATGCTGGTGCTATTGCTGGCCTTA   | T         | A       | GTCAAAGACAAAATATTTGTTCTCCCATGCA<br>GTTAGGTCTTTGTCAAGTCCATAAGCAATAGC<br>TGCAGCTGTAGGCTCACTCATTATCCGCATAAC<br>A    | NA                         | NA                          |

| Marker IDs   | Genetic positions (cM) | Chromosomes      | Physical positions (bp) | Flanking sequences/Forward primers                                                                           | ICC 12968 | ICC4958 | Flanking sequences/Reverse primers                                                                                                                                      | Annealing temperature (0C) | Amplified Product size (bp) |
|--------------|------------------------|------------------|-------------------------|--------------------------------------------------------------------------------------------------------------|-----------|---------|-------------------------------------------------------------------------------------------------------------------------------------------------------------------------|----------------------------|-----------------------------|
| Ca-II-SNP480 | 132.70                 | Ca-desi-LG(Chr)3 | 11810843                | ATACATTTCTAAGGCATCATCCTTCATAATCACCT<br>GAAATCCTTTCTGAATTAGTTGTCATATGCTCAAC<br>AAATTGTTTTCTATTCTTGGCACATACAAC | A         | T       | TGCACCATAACCTATTGGAAGCAGATAATCTTA<br>TGTTTTAGACCTAACTCAGCCTCACAATACCAA<br>CACCTCTTGGGTTAGGGTCTACTGGGTTTG<br>GTGTGTGGACATTTGTTGGCCAAATAACGATT<br>CTAGTATATAGACTTTTTGTACC | NA                         | NA                          |
| Ca-II-SNP481 | 133.65                 | Ca-desi-LG(Chr)3 | 11828812                | AAATTCTCTCCGGAATTGGGAGGGGCTGCAGCAA<br>GCCCATCGGTGACGATGCAACGTACTTTTGTGCT<br>TGCCACACATCACAACTTCTAACAAATCTTG  | C         | T       | AAGAATTCATTCTCTCAAAACGGTAGTCATT<br>CCAGTTTCTATGAACATATCGAAGAATAGCAA<br>GTAATCTTTATTGGATAGGTATGACAAAAACGG<br>C                                                           | NA                         | NA                          |
| Ca-II-SNP482 | 134.60                 | Ca-desi-LG(Chr)3 | 11858356                | ACACTATTTCTCTGTAGTTAAATTTGATGTGAAAA<br>GTTGATAGTTTTCTTAGCATAAATTTATAGGGTA<br>GATGCTACAGTTGCTTTATTGGTGGGGC    | A         | G       | AATATTTGTGTTCAATTTGTAATTGAAACAACCT<br>TTAGGCCATTAGTTAACTTTTAAACACTAATCTA<br>TAATAAACCGCTTAGAAAGATTGTCCACGACA                                                            | NA                         | NA                          |
| Ca-II-SNP483 | 137.45                 | Ca-desi-LG(Chr)3 | 11925952                | AACTTTTGATAAATATCAAAGTTTCGAAATGCTATT<br>TTTCTGGATCCTCTGAAACTTTTCAAACCTTTCAT<br>GAATTTGAAAGTTCTGAAGTGTGATTTTC | T         | A       | ATTTTTGAAATTGAATTACTTCGGAATTTGAA<br>ATTTTCGAGCATTACGTTTCAGAAGTTTCAAATT<br>CATCAAAATTTTCGAAAGTTTGTAAATTTCT                                                               | NA                         | NA                          |
| Ca-II-SNP484 | 138.40                 | Ca-desi-LG(Chr)3 | 11974306                | CTTTGACGATCAGCAGTTGTTTTGATTGACTATT<br>GACAGTTCTAATCCCATTGCAGCATGGTTCTGGTA<br>CAGATGGACCTGGGCTCCTTAGATAACCAA  | C         | T       | TACATGCATGGCTATGATATGTTTTGTTATGGG<br>AAGTAGTATTATGAAGCCAATGGTGAATACC<br>ATGTGGTCAAGTGCAACTATATGTAGCATCATG<br>C                                                          | NA                         | NA                          |
| Ca-II-SNP485 | 139.35                 | Ca-desi-LG(Chr)3 | 11993781                | GTTAGTAGTCCCACAAAACAATCCCAAAGCTATA<br>CACATCAACCTTGTGTTATAGTGCTTTTCTCTC<br>CCTGGCGCAATGTTACGGTACTGTACAAC     | G         | A       | TCTTTTTGGAGCGTGATTTTATTGTTTTACCGA<br>CAACTATCCAAAAAGTGCACCAAGTGAAGTCAAGT<br>GTGTTTTATCGACTGAATAGAGCTTTGTTTTTA                                                           | NA                         | NA                          |
| Ca-II-SNP486 | 140.30                 | Ca-desi-LG(Chr)3 | 12104449                | TGGAGTTCTTAAGCCGTCATGACTTTTGTCCATCT<br>TTGAACCTTTTAAATTTGAGATCAAATAGCCTTTT<br>TGAGCTTGGATGAATCCTACTTGTTCCTT  | T         | G       | CAGCCTCAAAAAGTTCATCACACATGTTGTTT<br>AAAGTTTTATCTACATCATTAAACAAGAATCTGTC<br>CTGAAATTTGTTTATCTAATCAATCAGTACATGG                                                           | NA                         | NA                          |
| Ca-II-SNP487 | 141.25                 | Ca-desi-LG(Chr)3 | 12119959                | CGGAGGCTCCGACCCGAATCGACGAGTTGAGT<br>CCAGCTCCGAACACGTTCCAGTGCTTCTTCTCA<br>ATCGCATTTTCGCTCCATTTTCTTCTTCTCGTT   | A         | T       | ATAAAGAAAGAGAATGTTTTGAGCTTCAGCAA<br>TGGAGATTGTGGCATGAATCGAAATAGAATGG<br>AATCGAACGCTTACAGATTTCGGTGACGACGGC<br>GA                                                         | NA                         | NA                          |

| Marker IDs   | Genetic positions (cM) | Chromosomes      | Physical positions (bp) | Flanking sequences/Forward primers                                                                          | ICC 12968 | ICC4958 | Flanking sequences/Reverse primers                                                                          | Annealing temperature (0C) | Amplified Product size (bp) |
|--------------|------------------------|------------------|-------------------------|-------------------------------------------------------------------------------------------------------------|-----------|---------|-------------------------------------------------------------------------------------------------------------|----------------------------|-----------------------------|
| Ca-II-SNP488 | 142.20                 | Ca-desi-LG(Chr)3 | 12234970                | AAACTTTATATTTTGTGGTACATGTATGTATCAT<br>TACACATTAATATTTTGAATTTTTTTTTAAGTTTT<br>CCGGTATATAAACTGAAGGTGATCAAA    | C         | T       | TTTGATCCTTTAAAAATTTAAGTCACCTGCACT<br>TGAATTAGTTTAAGAATTCAAAAACAATAAAAT<br>TTAGACAAACACAATTCAACTTTTCTCTCGT   | NA                         | NA                          |
| Ca-II-SNP489 | 143.15                 | Ca-desi-LG(Chr)3 | 12256632                | CGCTCACTCTAATGTGTCGAATGGGTGCCTTTTC<br>GCGTTGCATGATTCTCTCAGCTATTGTTATGTT<br>ATCTCACATGCATAGTTTGTATTTATCTTTA  | T         | A       | CTCATAAATATTAATTTTTAGCTGCACCATCTTA<br>ATATTTTTTAATAATTTATTAATAACGTCTA<br>TATAACTTGCATTAGAATTGAAATTGACA      | NA                         | NA                          |
| Ca-II-SNP490 | 144.10                 | Ca-desi-LG(Chr)3 | 12310829                | TGAACATAATTGGGTTTCAATTGATTAGTTCGGAT<br>TATACCTGAACCTGAATGAGTTGGGTCAAATGCG<br>AGTTAGATTGGATTGGTGACCGGTTGCGG  | A         | G       | CCAAAAAATGTTTGTTCCTTAACTTCTATCAAC<br>ACCTTGTGCTCTTTTCATCATATTTCAATAAGCTA<br>TTAGTTAGGGGTTCATGTGTACGGTTAAAC  | NA                         | NA                          |
| Ca-II-SNP491 | 145.05                 | Ca-desi-LG(Chr)3 | 12367109                | CAGGGCGACACTTGATTTTTACGTCTTATGTTGTT<br>CATTTATTCATAATGATGATTAACCTTAACTCAAT<br>ATAGACACATTCAACTTCTCAGCATCTT  | C         | G       | ACTCTCAACATTTAAATTAATAGTATAAAAAAT<br>AAAATATCTATAAATTTGATAAAATTAAGTGAT<br>ATGAATATATGTCTCTAGATTTTCAATGTT    | NA                         | NA                          |
| Ca-II-SNP492 | 146.00                 | Ca-desi-LG(Chr)3 | 12551743                | AGAACAACTACTATGGTGTAAAGGAAACAACCTGA<br>GTCATTTCTCCCTTCTCCATTTATCCAATTCTCC<br>CAAGATTGTTAATGTTTCTCCCAAGCAG   | G         | A       | CAAAGATTAAGTTGACAACGCTTTCAATTTTCAG<br>TAACTAAATTAGAGAGTAGTTAAAAGTTTTGTT<br>TTGGCTCGTACTCTGTTTGTACCTTTAATAAC | NA                         | NA                          |
| Ca-II-SNP493 | 146.95                 | Ca-desi-LG(Chr)3 | 12599684                | CGAATACAGACATGCTGTTTTGCTGCTGACTTAT<br>GTGTAGTCGAATACAAAAGGCTGTATTGCAATACA<br>GACATGTTGTTTTGCTGCTGACTGCTGAA  | G         | A       | ATATGTTAAACATGCATAATCAAATTTGAAAAAT<br>GAAGTTTTTCACAAAACCTGCACTGTTGTATTG<br>AATACACATCTCTGTATTGCAATACAAGGCTG | NA                         | NA                          |
| Ca-II-SNP494 | 147.90                 | Ca-desi-LG(Chr)3 | 12640565                | GATGGCTCAGGCCGCCACAAAATCCCTCCTTTGT<br>GAGGGCTTAGGCCGCCACAAATGACCTCCAGATT<br>AAAAAAAATCTTTTGTGAGGGCTTAGGCCGC | T         | C       | TACAATTTAAATTTATATTAATTTATTATATATAA<br>AATTATAATACATAAGTAATTTGAAATTTAAAAA<br>AATTAATTTTTAATATGCGTAATATTTTGT | NA                         | NA                          |
| Ca-II-SSR129 | 148.85                 | Ca-desi-LG(Chr)3 | 12686141                | CTTGATCGACGCACAAGCTA                                                                                        | (AT)9     | (AT)8   | AACTGAATTGAGAATTTAACATGGA                                                                                   | 60.16                      | 189.00                      |



| Marker IDs   | Genetic positions (cM) | Chromosomes      | Physical positions (bp) | Flanking sequences/Forward primers                                                                          | ICC 12968 | ICC4958 | Flanking sequences/Reverse primers                                                                                | Annealing temperature (0C) | Amplified Product size (bp) |
|--------------|------------------------|------------------|-------------------------|-------------------------------------------------------------------------------------------------------------|-----------|---------|-------------------------------------------------------------------------------------------------------------------|----------------------------|-----------------------------|
| Ca-II-SNP495 | 149.80                 | Ca-desi-LG(Chr)3 | 12697957                | GATTAGAAAATCTGCAATTTAGGCCAGTAAAGTT<br>TGCCATTAGACTTTTATTCCAACACAAAAGTTGTA<br>GCTCTGATTTTTATCTTTCCAACGCTTGCT | T         | C       | ATTGCTCTTTGATAGTTTGCCCCAGCATTTTTTC<br>AATCCAAGTGACTCTTGCTCGCTCTGTAGGCCA<br>TAACTTGAGCTCTAGATATCCGATTGGTGCCTA<br>C | NA                         | NA                          |
| Ca-II-SNP496 | 150.75                 | Ca-desi-LG(Chr)3 | 12752594                | TCTGAGACTTTAATTTCTAAAGTTATTGTGACTGAT<br>AGAGATCTTGTATGATGAATGCGATTAGTGTGGT<br>GTTTCTACTTCAATACATTTGCTATGTC  | A         | G       | GAATATACAATTTTTTTCCATAAATCCATTACT<br>TCTTCTTGTCTAACTTTTTTACATATTGTTTGC<br>ATTTTGCCCCAACATTTTTTCAATATGAAAA         | NA                         | NA                          |
| Ca-II-SNP497 | 151.70                 | Ca-desi-LG(Chr)3 | 12781161                | TATTTATTGTAATTTTTTTAAGTCAACTTATTTT<br>TTTAGTGCAACTTATTTTTTAAAGTAACTTATTT<br>ATTAATAATCGTTGTTCCGTGCGACGC     | C         | A       | TTAACATATATTATATAAGAAACATTACGGGT<br>TTGTTGTTGGGAGTTCAGGAGGAGTCTCGAT<br>AGAAATTGCTTTAAATGTAAGTACTGTCTGAACCC<br>G   | NA                         | NA                          |
| Ca-II-SSR130 | 152.65                 | Ca-desi-LG(Chr)3 | 12784679                | TTGACCATATAACCATATAGGAATGA                                                                                  | (AT)8     | (AT)7   | TCAAAGAGATAGACGTCAACACA                                                                                           | 57.92                      | 103.00                      |
| Ca-II-SNP498 | 154.57                 | Ca-desi-LG(Chr)3 | 12991606                | TTTGTAATTTTTGTTCTTTGAGTTGATAAAATGTT<br>TTGTGTTTTTATTTGTTGATTAAGTAGGAATTTGT<br>CGTAATTTACATTGCGTTTTGTTTTAG   | C         | T       | TTTTCACTTTGTTGACCCCAATTGAACATCTAC<br>AACTCCAGATATGGCTGAAATACTCTACATATG<br>TCATGTTGATTTCTACCAAAATTCAGCACTGC        | NA                         | NA                          |
| Ca-II-SNP499 | 155.53                 | Ca-desi-LG(Chr)3 | 13021945                | TATTGTTGTTGGAGCGAGTAATTGATGATGAACAA<br>CCATCTTGTTTAACTATAAACTAGAACTATTTGG<br>GTGATGGTTTACAATCTCCCTTTGAAGCT  | T         | C       | TCATACACAAAAACAATTAGTTATGTGTGATTC<br>CTTTGGAAGTGTTCCTCATGTGTGCCGATGAT<br>TCTTCTTAGCTTCTTTGACATGGCCTCTGATCA        | NA                         | NA                          |
| Ca-II-SNP500 | 156.49                 | Ca-desi-LG(Chr)3 | 13047533                | CTTGAACCATTTTGATGCAAAGTATCCAACTTC<br>GCAAATGAACCAAGAAATGTAAGGCTTGGTTTATG<br>TTCTGATGGCTTACGCCATACATTCAGGC   | C         | A       | TGAGACAGGTCAAAAACATGAATGGTTTAGTCA<br>TGACATTTTCGGGCGGGAGATTATACGGGGTC<br>ACAACAACAGGCCAACAAGAATATGGGGTTGA<br>AGA  | NA                         | NA                          |
| Ca-II-SNP501 | 157.45                 | Ca-desi-LG(Chr)3 | 13165372                | AATGTTTTATTGTTTTATGTATCAATCCATGGTTT<br>TATTGAAAAATTAATTAATCTTATTGGTTTGA<br>AATTGACTTTATATTGGCTTGAGAATTG     | T         | G       | TTTTGAATTAATCAAATGATATTTATAATTATT<br>ATTAAGAGATTTGAAATCAGTACTTCGAAATTA<br>CAAAATTAACCTTAACAAATGATCTGTAC           | NA                         | NA                          |

| Marker IDs   | Genetic positions (cM) | Chromosomes               | Physical positions (bp) | Flanking sequences/Forward primers                                                                           | ICC 12968 | ICC4958 | Flanking sequences/Reverse primers                                                                                                                                                                                                                                                        | Annealing temperature (0C) | Amplified Product size (bp) |
|--------------|------------------------|---------------------------|-------------------------|--------------------------------------------------------------------------------------------------------------|-----------|---------|-------------------------------------------------------------------------------------------------------------------------------------------------------------------------------------------------------------------------------------------------------------------------------------------|----------------------------|-----------------------------|
| Ca-II-SNP502 | 158.41                 | Ca- <i>desi</i> -LG(Chr)3 | 13193734                | TTTTTGTGCATCAATAGATTAATTACCCTGTTTTGAA<br>GTTCAAACATCTTTTGAATTGTTTTATAACATGCC<br>ACTCACTTTTGTGATTTAAAGGTTTTT  | T         | G       | CTTTAGTACCTAACTTAAACCAAGAAAAACA<br>TTTTTCGAGCCTGATGATCTAGTTTGGATCTTT<br>GACGAAGTAAGGTAGAGGCAAAAGATAAACAA<br>C                                                                                                                                                                             | NA                         | NA                          |
| Ca-II-SSR131 | 159.37                 | Ca- <i>desi</i> -LG(Chr)3 | 13219360                | ACACCGACTCATTGACACCA                                                                                         | (AT)9     | (AT)8   | TGTTGGGTTGCCATTAGAT                                                                                                                                                                                                                                                                       | 60.01                      | 149.00                      |
| Ca-II-SNP503 | 160.33                 | Ca- <i>desi</i> -LG(Chr)3 | 13220353                | AAATATTAATTTTTGCTCTTTTCTTTGTCGGTAAAT<br>TGGATGGTACGTACACTTGCATGTGTCTGTATG<br>TTTAAACGGCAAATTTTACTCAAAATAA    | C         | G       | AAAAATGAATTTGACTTACTTTTCATTCATTTCA<br>ATCTCTCAAAGTTCTTTTGGTTTTTGTGTT<br>ATAACATTGTTTCTGAGCTTGTAGTGACATA<br>ACAAGGCACTATACATTTAATATTGAGTACTTG<br>AATGTCACAAGATTGTCCACACAAGAACATT<br>CTTAGTGAAATGGAAATCCAGGACCTCGT<br>TTAGTGGCAAGGGAAGGTGATAGATTTTGGT<br>CAAACTGCTTAATCATATCTCAAAACAATCTAAC | NA                         | NA                          |
| Ca-II-SNP504 | 161.29                 | Ca- <i>desi</i> -LG(Chr)3 | 13265079                | GATTGAAATAGCTAATTGATTGCTTGAATTTGG<br>ACTGTCCCAATTTCAATTTCCCTTAAATCCTACAC<br>ATTGCTTCATTGGGAGCTTTTGTGAATTG    | A         | G       | AATTTAATTGTTAAAATTAAGTTAAAAGAAAATG<br>AAAAACATAAGCAGCAATGAGAATTTATGATTCA<br>ACAAAAGCTTGAGCTCTAACTAAAAAACAGCC                                                                                                                                                                              | NA                         | NA                          |
| Ca-II-SNP505 | 163.21                 | Ca- <i>desi</i> -LG(Chr)3 | 13318452                | TTAGTATGAAGTTCAGAGTCAGATGCTTGTGTTGA<br>GTTGCTTTATTGGAGGCAATTCATTAGAACATGTT<br>ACACTTGACTTCATAGTCTCATCTTTAGAG | G         | A       | AACACGCACCTCTAAAGCAGATGCCTCTAAG<br>GATATGCCCTACCTCTAAGTAACCGAGTCTAA<br>GAATTTGAATCTGATGATCTCCCTCCAAGTTTT<br>TT                                                                                                                                                                            | NA                         | NA                          |
| Ca-II-SSR132 | 164.17                 | Ca- <i>desi</i> -LG(Chr)3 | 13319724                | AATCAATTAACAAGGCTCGCA                                                                                        | (TA)16    | (TA)10  | GGAAAAGATTGGCCAAGGTAA                                                                                                                                                                                                                                                                     | 59.73                      | 108.00                      |
| Ca-II-SNP506 | 165.13                 | Ca- <i>desi</i> -LG(Chr)3 | 13345747                | ATACAAAATGTGAAGTTTTAATGACATACCTATTAG<br>TCGTAGTATTTCTAGATGCAATACTCGATTGGTC<br>CATGCTTCAACAAATCTTTCTTATGCGG   | C         | A       | GTTCTGAAGAGAAGGAGTACGAGGAACTTTTG<br>CAAATTTTTGAGCAAGCATGTGTCGATAATATT<br>ATTTTCTTTGACTACGTACAGACACATGGTTG<br>AA                                                                                                                                                                           | NA                         | NA                          |
| Ca-II-SSR133 | 166.09                 | Ca- <i>desi</i> -LG(Chr)3 | 13372497                | TGGATCCACAACACGACAAT                                                                                         | (TA)19    | (TA)15  | TCCTTTAAGCGCAGAAAAC                                                                                                                                                                                                                                                                       | 59.81                      | 179.00                      |

| Marker IDs   | Genetic positions (cM) | Chromosomes               | Physical positions (bp) | Flanking sequences/Forward primers                                                                           | ICC 12968 | ICC4958 | Flanking sequences/Reverse primers                                                                             | Annealing temperature (0C) | Amplified Product size (bp) |
|--------------|------------------------|---------------------------|-------------------------|--------------------------------------------------------------------------------------------------------------|-----------|---------|----------------------------------------------------------------------------------------------------------------|----------------------------|-----------------------------|
| Ca-II-SNP507 | 167.05                 | Ca- <i>desi</i> -LG(Chr)3 | 13385275                | TGTAGATGGATCTTAGCTTTCATTAGCACTTGG<br>AGTGACACTAATTGGACATCTAGAACTCCAGATAT<br>GGCTGAAATACTCCACATGTATCATGTTGA   | C         | T       | TAATAAAATGATTTTTGTTTTATTTTCGTTGATT<br>AAGTAGGAATTTGTCGTAATTTTACATTGCGTTT<br>TGTTTTAGTGCAGTGCTGAATTTTGGTGAAAA   | NA                         | NA                          |
| Ca-II-SNP508 | 169.93                 | Ca- <i>desi</i> -LG(Chr)3 | 13478676                | TTTATCTAATGCTAACAGACTTAATTGGGTGAAGA<br>GGTATGCCATTGCTTTAGGAACAGCTAGAGTGTTA<br>GCTTATTTACATGAAGAATGTTTGAATGG  | A         | G       | TTGTTTCTATTTATTAAGTAAAGACCAAAAT<br>CAGCTAACTGGGATGCAAGTTAGAATCAAGAA<br>GTATATTTTGTGGCTTAATATCACAAATGCAAAA      | NA                         | NA                          |
| Ca-II-SNP509 | 171.85                 | Ca- <i>desi</i> -LG(Chr)3 | 13503033                | GATTATCTATTGGTTCGGAATCTTGAAGGGTGC<br>GAGAATGGGTCCTTCATTTCTCTGTTTGTGGTTTC<br>TTATTTCAAAGACATTTCCCTTCCAATAGG   | C         | G       | ATGATCAAATCTTGATCCCAATAATAATGAAG<br>GGCCACTTGAATGCCACAACATAATGACTCAT<br>ATATAGAGACACAAAGCAGGTTTATTACAATTG<br>A | NA                         | NA                          |
| Ca-II-SNP510 | 172.81                 | Ca- <i>desi</i> -LG(Chr)3 | 13520714                | TTGGACAATTATTTTTGTTGTTATATCCACGGTC<br>CAACCCAACGTATATCATTGTTGATTGACCATATAC<br>AAATACGGCTAAGTTTTGGATGATTCTTGA | G         | A       | TCAAATATAAGCCAAAACAATTATTAATCAAAT<br>TTACTTATCTTTAAATTAAGTAAATTTAAATTTAAA<br>TTTTCACTCTCCTAAGACAGTGAACAAAGTT   | NA                         | NA                          |
| Ca-II-SNP511 | 173.77                 | Ca- <i>desi</i> -LG(Chr)3 | 13570118                | CATCTATTTTTAACTTTCTTGCTCTTGGACCTTTAT<br>AGAGTACAAGTGTACCATTCAATTGGAGAACAG<br>GAGCAATGCTCTCCCGCTGGACTTGTGGA   | A         | G       | TTCCATGGATAGGCTCCCTGTTGGACTTATTCT<br>CTCCCTCCATGTCCAGAATGAAAAATCTACAG<br>GAAATATCAATTCATTAAGTGAACAGTACATC      | NA                         | NA                          |
| Ca-II-SNP512 | 174.73                 | Ca- <i>desi</i> -LG(Chr)3 | 13635021                | TTCTTTCCTTACAATTGGCAAGAAAATGTTGAAATA<br>CGTCTTCATGCTTATTAGAGTTACATGTCGAATTT<br>TCAATTGATGTTGAAGTATGATTACTTTT | C         | T       | AATAAATCAATGTTTTAAAGAATCAAAGTGTGA<br>AGTAAAAATAGAAAATGCAACTCTGAGAACTGA<br>TATTGTTGAAGTAAAGTTGAAAATCTAACTCC     | NA                         | NA                          |
| Ca-II-SNP513 | 175.69                 | Ca- <i>desi</i> -LG(Chr)3 | 13739225                | CGTGTAACACTTTTTCTCTCAACAACTCAACATCG<br>TTCAACCCTTTGAGTATTTTTGCATCTTGAGAGACT<br>TCCACCGTATTTTTGGTATGATTTTGTAT | C         | A       | ATAACAACCCAGTTTGATTATTAGAACCAACTT<br>CTTTTTAATGGTATGAGTTTTATCACCCCTTTTA<br>ATGTAGGAAAAATAAATCTAATAGCAGAGCAAA   | NA                         | NA                          |
| Ca-II-SNP514 | 176.65                 | Ca- <i>desi</i> -LG(Chr)3 | 13794278                | AAACTGGGTTTCCACTGTGACTTATCCAATCGATT<br>TCCCAATCGATTTATTTCAATCAGGTTTACTTTGTG<br>AATTGTATAATCGATTTGTCAATCGATTA | A         | C       | AAGGAACACAAGTGTGTTGTTGGTATAATCG<br>ATTGGCAATCGACTGACTGAATTAGAAATGA<br>AAATGCATAAGTCAAGTGGCACCCAGTTTTGAG<br>G   | NA                         | NA                          |

| Marker IDs   | Genetic positions (cM) | Chromosomes      | Physical positions (bp) | Flanking sequences/Forward primers                                                                           | ICC 12968 | ICC4958 | Flanking sequences/Reverse primers                                                                                                                                                                                                              | Annealing temperature (0C) | Amplified Product size (bp) |
|--------------|------------------------|------------------|-------------------------|--------------------------------------------------------------------------------------------------------------|-----------|---------|-------------------------------------------------------------------------------------------------------------------------------------------------------------------------------------------------------------------------------------------------|----------------------------|-----------------------------|
| Ca-II-SNP515 | 177.61                 | Ca-desi-LG(Chr)3 | 13874492                | CTTTCTCTCAATGTGCGATTACGATTTCTTGAA<br>GCTTCAGGAAGAAAACGGGATTCAGGAAGATTCA<br>GATCATTAAATTTACGATTTACGGAGATTCA   | C         | G       | TTCTGTCTTCTTATCTCATCTCCACTAATTTCC<br>CTCTTCTCATCTCCATCGTTTTCTCTGCGTCT<br>TCCGTGAAATGCTATCGTCTTCGCGTTTTCTTC                                                                                                                                      | NA                         | NA                          |
| Ca-II-SNP516 | 178.57                 | Ca-desi-LG(Chr)3 | 13914902                | CAGATTCACGCCCGAGGATGAAGAAAACGGCGAG<br>CGGCGACAATGGCGGGCAGGGACCACGGCGAGC<br>AGTGACGACAGCGAGCAGTGACGACGGCAAACG | A         | G       | ATTAAAACTTGAACCTGCGCTTGAAGTTATCC<br>TGGTCGTCGTCGTTGTCATTGCTCGTCTGGT<br>CGCTTGCTCTCCGGGTGCTGCTCGCCGTG<br>GTGG                                                                                                                                    | NA                         | NA                          |
| Ca-II-SNP517 | 179.53                 | Ca-desi-LG(Chr)3 | 13936315                | TACATCTAGTCTTTAAATTTATCTCAATTTCCGTT<br>TAGGTCATTTAAGTTTACTTTTTCTTAATTTGGTCT<br>TTAACGTTACATTTGTTGTATTATTA    | A         | G       | GTCACTACGATGTTTAGTTTGAATTTAACATTT<br>AATGACACTAATCCGTTAAAAATGCAAAATATTA<br>AAGACTATATATAATTTAATATATCTAAAAG                                                                                                                                      | NA                         | NA                          |
| Ca-II-SNP518 | 180.49                 | Ca-desi-LG(Chr)3 | 13949576                | CCTTTAGTGATTTTGACTATTTAATGTGATTTTTTC<br>TTGATGGAATGTTTGTAAATGATACGGTTCTATT<br>ATGATTGTTTTGAAGACATGTGCTTCCC   | C         | T       | TCAGAACTCTTTGCCATTGCTATGTGAAGAAT<br>GAAACCGTGTGTTGAGGAAAGCATAAAAAAGACC<br>TAGCTGGGAGAAACCTGTTATGATGCTAAATGT<br>GCAAGTGCATGGGAAATTGAAAATGTATTCTT<br>TTTAGGTTCCGCATGTTATGCATCACAGTTCTT<br>CACTCACAACATGTCTTAATATCACAAAAGAA<br>GAAAAGATATCTACTAAGC | NA                         | NA                          |
| Ca-II-SNP519 | 181.45                 | Ca-desi-LG(Chr)3 | 14004716                | GGTGATTTTTCTATTGCAAAAATGCGACTTG<br>AAGTGATAGTAGTCTTTAATGTTTCAATGTCTG<br>CCCTTTGGCATTATAGGTTTGGACATGCCT       | A         | C       | GCCTGTTGCCACTCAATAAAAAATGTCAATCT<br>ACAAATCAAATATTTATTACAACAATAATAGGA<br>AAGTATTTGTGAAGCATATCTAACTTTGTAGAA                                                                                                                                      | NA                         | NA                          |
| Ca-II-SNP520 | 182.41                 | Ca-desi-LG(Chr)3 | 14069380                | AATTCCTTATTGAATTATTACCAAATCTCTTTAT<br>TATTCTTGCCCTAATGTCTTAGTGACATAACCTTTA<br>TTTCTAAAGTAACCCATAAATTCCTTAGT  | A         | G       | AGGGATAGATGCGGGTCATGAAACCAATTA<br>GTTGTTGCAAAAGGCAATAGTTTTAAAAGAGAAA<br>TCTTGAACTGTAACACAAATTTAACTTAAAT<br>T                                                                                                                                    | NA                         | NA                          |
| Ca-II-SSR134 | 183.37                 | Ca-desi-LG(Chr)3 | 14096792                | TCTGTTTTGGTTGGTGGTGA                                                                                         | (AT)8     | (AT)7   | CAGGCCGACCTACTTCTTT                                                                                                                                                                                                                             | 59.98                      | 128.00                      |
| Ca-II-SNP521 | 184.33                 | Ca-desi-LG(Chr)3 | 14141483                | TGTGGTAAGAAAAAGTTGTTAAACCACGTGTTGT<br>TAATGACCCATCTCATGCCGATCCGACGATT<br>GGTACTAGTGGTGGAGCTATTCCTCTATATC     | A         | C       | ATACCCATCTCCTTCTGGAATGATGACAATGCG<br>GTTGTAGCAATCAACACATCCGGTTCCATTAC<br>TTCGTCTATGGTATAAGGCTCTATAGGGACCTC<br>A                                                                                                                                 | NA                         | NA                          |

| Marker IDs   | Genetic positions (cM) | Chromosomes               | Physical positions (bp) | Flanking sequences/Forward primers                                                                          | ICC 12968 | ICC4958 | Flanking sequences/Reverse primers                                                                                                                                                                                                                                                            | Annealing temperature (0C) | Amplified Product size (bp) |
|--------------|------------------------|---------------------------|-------------------------|-------------------------------------------------------------------------------------------------------------|-----------|---------|-----------------------------------------------------------------------------------------------------------------------------------------------------------------------------------------------------------------------------------------------------------------------------------------------|----------------------------|-----------------------------|
| Ca-II-SNP522 | 187.21                 | Ca- <i>desi</i> -LG(Chr)3 | 14208354                | TTTAAAGGCATATATTTCAAACCTTTATTGGAATCC<br>ATGTGATGTTATTAGACTTTTGTTCGACATTGTA<br>GCACCTCTTTGAGCTCGAAAACTTGTA   | A         | G       | ATGTTTCGACGCGTAAGTAATATTCATTTATTTCT<br>TACATATATATAAATAATGTGTTTGTAAATGC<br>TATAATAATCACATTTATTTATTCGATAGTGC                                                                                                                                                                                   | NA                         | NA                          |
| Ca-II-SNP523 | 188.17                 | Ca- <i>desi</i> -LG(Chr)3 | 14405537                | AGTTTGGAAGGAGCCCTTACCTTAACGTTAGCTCT<br>AACGTGCGATTACGGCACCGTGAGTAAATCCGGT<br>AAATTTCCGCTCGCAACGCCGCTTCCAAAA | T         | C       | TCAAACACAAACCTCCCTGTTACACCTAGATCT<br>AAACGTGCTTTCAAGAAGTGATAGAAGGGAAG<br>GTTGCTCACCTCCGTGCTACGGTGCTAGTGGA<br>TCA                                                                                                                                                                              | NA                         | NA                          |
| Ca-II-SNP524 | 189.18                 | Ca- <i>desi</i> -LG(Chr)3 | 14513401                | ATTTGCGTCACATCGTTTATATTCTTATGTTGGCAC<br>CCTTCATATGTTCTATTATTCATCTCACATTTTCT<br>ATTCTCAATTTAGTCTCTGCATCTCACA | C         | T       | AAGAATTGGATGAGCCGCAAAAGTTGATTGAAG<br>TGAGAAGATGATAGAATTTATTTATGATGAGC<br>TTTTTTGAAAGGTTTTTAACCTTATGTATATGAT                                                                                                                                                                                   | NA                         | NA                          |
| Ca-II-SNP525 | 190.19                 | Ca- <i>desi</i> -LG(Chr)3 | 14615636                | AAGAGTGGCTTGACGAACTTATTTCTCGACTTT<br>TTTTTCCCTTCGATGAATTTCTTTATAATCCGTTT<br>TCGTTAACATTGGAAGTTTTTATTTGTTT   | T         | C       | AAACCAATAATCTTTGGTCATCTTCAATACAGAA<br>ACCGATCAATTTAACGAGATTCGAGTGGACAAT<br>ATCACCAGAAGATGCTAACTCAGCCTGGAAAGG                                                                                                                                                                                  | NA                         | NA                          |
| Ca-II-SNP526 | 191.20                 | Ca- <i>desi</i> -LG(Chr)3 | 14739635                | ACCATTGCCACGAGTTTCTGTTTCTGTTTCTCT<br>TTACTTATTGTAGCTATTAACGGCCACCATAGTC<br>TCCCTTCAAGAAACATGCATCCAACCCAAT   | T         | C       | ATATTAAGTGTGGTATGTCTTGTGTTGGACTAG<br>TTTTTGAGAGAATATATGTATGTTGGAGACTT<br>GTAAGGTTGCATTTGCTAATACATGTAGACCTT<br>T                                                                                                                                                                               | NA                         | NA                          |
| Ca-II-SNP527 | 192.21                 | Ca- <i>desi</i> -LG(Chr)3 | 14776422                | CCTTTAGTGATTTTACTATTTAATGTGATATTTTC<br>TTGATGGAATGTTGTTTAAATGATACGGTCTATT<br>ATGATTGTTTTGTAAGACATGTGCTTCCC  | G         | T       | GTTTGATTATTTTCTGAAATGTTTCTCAATTCA<br>AACCATTAGATCAATCAAATAATTCATATGATT<br>GTATGTTGGGAATTAATCAAACATGATC                                                                                                                                                                                        | NA                         | NA                          |
| Ca-II-SSR135 | 193.22                 | Ca- <i>desi</i> -LG(Chr)3 | 14825740                | GCTCAACATTGGTTGCCTTT                                                                                        | (CT)8     | (CT)9   | CCATTGGAGACCAAATGACA                                                                                                                                                                                                                                                                          | 60.12                      | 183.00                      |
| Ca-II-SNP528 | 196.25                 | Ca- <i>desi</i> -LG(Chr)3 | 14949792                | ATACATTTCTAAGGCATCATCCTTCATAATCACCT<br>GAAATCCTTTCTGAATTAGTTGCATATGCTCAAC<br>AAATTGTTTTCTATTCTTGGCACATACAAC | A         | T       | AAAAATGGGTGAAGAAGTTCATATTCAAAATCA<br>ACAACAACAAGAACAAGAATCCTTTTTCATCCC<br>AAATTCCTCAATCTCTCACAAACAAAACAATCC<br>ATTATTATCCAGCTTCATCAATGCTTGATCTTG<br>ATCATATTGTAATCATAATCATCATCATCA<br>ACAAGAACAATCAATTAACAACAATAACAACGA<br>TTTTTCATCAATGCTGCATCTCAACAGCACAA<br>TTCAACCTCAACTCCGACCTCAACCAACTC | NA                         | NA                          |

| Marker IDs   | Genetic positions (cM) | Chromosomes               | Physical positions (bp) | Flanking sequences/Forward primers                                                                           | ICC 12968 | ICC4958 | Flanking sequences/Reverse primers                                                                                                                                                                                                                                                                                | Annealing temperature (0C) | Amplified Product size (bp) |
|--------------|------------------------|---------------------------|-------------------------|--------------------------------------------------------------------------------------------------------------|-----------|---------|-------------------------------------------------------------------------------------------------------------------------------------------------------------------------------------------------------------------------------------------------------------------------------------------------------------------|----------------------------|-----------------------------|
| Ca-II-SNP529 | 197.26                 | Ca- <i>desi</i> -LG(Chr)3 | 15061743                | TAGAGTTCCAAATAAAATTAGGGTTTCAATGAATA<br>CCGGCGGTGACGAATCGGCGATTGTAATGCATAC<br>GCTTGTGAGCACGGCCACGTGGCTTCTTCTT | C         | T       | TAATCAACAATGGAATCTATTTGTAGGTAAGG<br>TTCACGGTTCACCTTGTCTGTGCCGAAAAGTG<br>AGAGGCCAAACACCAAAAGTGGCCAAGCAGGA<br>CAA                                                                                                                                                                                                   | NA                         | NA                          |
| Ca-II-SNP530 | 198.27                 | Ca- <i>desi</i> -LG(Chr)3 | 15111898                | TTGGAACATTTCTCCATCCTCGGAGTCCTGATCC<br>TTGAGGGATCAAAGAATTGGCAATTTAGTCGAAT<br>CATTTTTATCATTAGCCTTGCTGCTCCCAT   | G         | C       | GAGGACTGGTCTTCAAAAAGAAGGATCAAGAG<br>TGATTTTTGGAATTCCTAAACCTGGGAAGAAAA<br>GGAAGTTTATGGAAGTAAGCAAGCATTATGATG<br>CA                                                                                                                                                                                                  | NA                         | NA                          |
| Ca-II-SNP531 | 199.28                 | Ca- <i>desi</i> -LG(Chr)3 | 15124677                | CTATTTCCAGTTTCTTGCTGGAAGAAAATTCTACT<br>TCGTAATCTCGTTGCTTTGTATTACTCCTCACA<br>CCACTCCTCAATCAGCTCCTCCAGGTAGTA   | T         | C       | AGAGAGGGAAGGAATTGATTATATCTACTTGT<br>AACTTCTCTCTTGATATCATGTGTTTCACTAAAG<br>CAACTAGCCTACTTACAAAATGACTTTATTGT<br>GGGATCGGAGAGGCAATTCCTGAAACAACCTT<br>CATCAATAATGCAAACTTTTGAAGCATCTTAA<br>GTGAAATCACACGGAAATAGTAGAAAATAGTT<br>ATACATGAAAAGAAAACAATGGGTTTGGAA<br>ACCATATCTTTCCCTTTTCCGACATCCATCT<br>GCTACTCTCTCAACCCCT | NA                         | NA                          |
| Ca-II-SSR136 | 200.29                 | Ca- <i>desi</i> -LG(Chr)3 | 15207234                | GGATTGAAAAACCTGGAAA                                                                                          | (AG)8     | (AG)9   |                                                                                                                                                                                                                                                                                                                   | 58.86                      | 102.00                      |
| Ca-II-SNP532 | 202.31                 | Ca- <i>desi</i> -LG(Chr)3 | 15327978                | TCTTCAGAAGATACATGTATTCACCTTTGAGATGT<br>TGTGCAACTCCCGCTAATCTTTCAATTTTCATGCG<br>TGGGACTAATTACAAGAATTTGACTTTCA  | A         | T       | TGAAAAAAGGAATTATTAATTATAGTGAAT<br>GATTTAGTTTTACAATGTGATCAATTAATCATA<br>AGCTATTTTTTCATCATCTTTAAATTAGATATA                                                                                                                                                                                                          | NA                         | NA                          |
| Ca-II-SNP533 | 204.33                 | Ca- <i>desi</i> -LG(Chr)3 | 15465535                | TTTGTGTTGACTTTCTTACAGGTAATCAACAAGAA<br>AAAAATGTTACAGTTATGACATTTGGACAACCTCG<br>TATTGGGAATGCTGTTTTGCATCTCTCT   | A         | G       | TTGGTATGCTTTTTCGGTAATAGTAATAGTA<br>TGAGGCAAAATGAGGAACAATATCATGCTCATG<br>TGTGACTCGGATTGATTTGGAAC TAGTTTGTCT<br>G                                                                                                                                                                                                   | NA                         | NA                          |
| Ca-II-SNP534 | 205.34                 | Ca- <i>desi</i> -LG(Chr)3 | 15837875                | AACTTGTGCTGGATCATGGACTTATTCAAGGACC<br>ACAACCTTTGTGGCCCAACATTGTATACGGATACAA<br>AGATATTTGTACCATGTACCCACCTATT   | C         | T       | TTCGAATGGGGCGTGTGGAATGGAGTGGTAA<br>ATTTTTTTTTTTTCATAAAAAGGTAAAAAGGACA<br>ATATAGTCTTTCCATTGAAATGGGGGTGGGA<br>G                                                                                                                                                                                                     | NA                         | NA                          |
| Ca-II-SSR137 | 206.35                 | Ca- <i>desi</i> -LG(Chr)3 | 15914984                | TGCACACAACAAGTGTGCTT                                                                                         | (AT)12    | (AT)13  | TCTACAAAATGTTTAAGATACGCACT                                                                                                                                                                                                                                                                                        | 58.92                      | 179.00                      |

| Marker IDs   | Genetic positions (cM) | Chromosomes      | Physical positions (bp) | Flanking sequences/Forward primers                                                                            | ICC 12968 | ICC4958 | Flanking sequences/Reverse primers                                                                                                                                                                                                                                                | Annealing temperature (0C) | Amplified Product size (bp) |
|--------------|------------------------|------------------|-------------------------|---------------------------------------------------------------------------------------------------------------|-----------|---------|-----------------------------------------------------------------------------------------------------------------------------------------------------------------------------------------------------------------------------------------------------------------------------------|----------------------------|-----------------------------|
| Ca-II-SNP535 | 207.36                 | Ca-desi-LG(Chr)3 | 15992284                | TGTTCCAAAATATTTTTGGGAAGAGGTTGCCTCA<br>CATCAACATATCTTATTAATCAATAACCTTCTAGAG<br>TCTTGGGGTCCAAGAGTCTATGGATGTT    | G         | C       | TTTCCCCAATCATGACCATGAACATGGACAAAT<br>GAGACACACCCCAAAGATTTGGTGGGAAGATTA<br>ATGGTAGTGGACAAGTTCAGATAGAATGAAGAA<br>A                                                                                                                                                                  | NA                         | NA                          |
| Ca-II-SNP536 | 209.38                 | Ca-desi-LG(Chr)3 | 16125396                | CGTATAGGCAAATATGTGTGGCTTTTGTCTCCTGT<br>TAAGTGTTAACTGCCATTGCTTTTTTATTTGGATG<br>ACTATTGCTGCTTTATTCTGATTCAATCC   | G         | A       | AACAACCCAGGGTTCACATTACCATTTACACT<br>CTTTGATGTCAATGCATTCTTCAAGATTTC<br>CAGACCTATAACATCAACAACAAAAGTTCAACA                                                                                                                                                                           | NA                         | NA                          |
| Ca-II-SNP537 | 210.39                 | Ca-desi-LG(Chr)3 | 16211241                | TTCCCGCGTTACCTTCCTCATACTTATAACAGA<br>AAATCCCTTAAATCATGGAAGACTCTAACCGACT<br>ATTATCCCTCGCTTTCTAGAAACTGTTAG      | A         | G       | TGTATCATTTTCTTTGCAGAGATTCTCTCCATT<br>ATTTCTATATTTTTTCAAATATTAGTGTCTTTC<br>CTCTAAATCCTTGGAAATCAAATCTTGGGTT                                                                                                                                                                         | NA                         | NA                          |
| Ca-II-SNP538 | 211.40                 | Ca-desi-LG(Chr)3 | 16234484                | AATGCATCCAAAACAGGAGAGACAGTGGTTGTTT<br>CGGAAAACTTTTCTAGCAGCGACGGCAGGCAGCA<br>GCAGCAAACGGCGCGCGGCAGTAGCAGACG    | T         | G       | ATTAAGTCTAGCTTCTTTTGTGTATCTTTGGAG<br>CCACTTTACAAAGAGATTGGACAAAGTCAATT<br>TGGGCTGTTATGACTGTTGTGGTTGTGCTTGA<br>GTTCACTGCTGGGGCAACTTTATGCAAAGGGC<br>TCAACAGAGGATTAGGGACACTGATAGCTGGA<br>TTACTAGCATTCTTTGTTGGCTATATAGCAAAT<br>GCGTCATCTGATAGAGTCTCTCAAGCAGTTATC<br>ATTCCCGCCC         | NA                         | NA                          |
| Ca-II-SNP539 | 212.41                 | Ca-desi-LG(Chr)3 | 16346213                | CTGAAAAAAGCTCTCACAAAAGACTTCAAATTTAGTT<br>GGATTTTGTGGTTGCCCTAGCCCTCACAAAATCAC<br>AACGTTGTTATTTTGTGAGGGCTTAGGCC | A         | G       | CGGATCAATGCTTTTGTGGCGCCTTTACCGT<br>CACAAATGGTTGATTTTGTGGCTGAAAAGCCC<br>TCACAAAGGACTTAAATTTTAGCTGGATTTTGT<br>GG                                                                                                                                                                    | NA                         | NA                          |
| Ca-II-SNP540 | 213.42                 | Ca-desi-LG(Chr)3 | 16443044                | AAATCTCATTGTGTCCCTTAGGTTTGTGGATT<br>GAGACTTAATTAAGCCTTAGGCTAGGTTTGGATTG<br>ATGGTATGAGATGGAATAAGTTTATGTTCC     | A         | T       | AATTGGAGGGGAACAAAAGTGAAGGTAAGTGA<br>TGGAATAGGATGGAAAGTATCCATTATATCC<br>ACTTCATTTTCTCTTTTTGACAATCCAACA<br>A                                                                                                                                                                        | NA                         | NA                          |
| Ca-II-SNP541 | 214.43                 | Ca-desi-LG(Chr)3 | 16522022                | TGATTTTACTTAGATGATGCTTTTCCAAAATAATT<br>GTTATGATTGATGAGTAAGAATGTGAACACCCCG<br>GCCATTACCGTTACCGACGGTGCCACCTC    | A         | G       | GGAGGCGGTATTATCCCCTAGGTACCGGGCTC<br>GAATCCCACGGAAGGCAAAAAGCTCGTCAGATTT<br>CCATTGGGGGCGAAAGAGGGGACGAGAAG<br>GTCG                                                                                                                                                                   | NA                         | NA                          |
| Ca-II-SNP542 | 215.44                 | Ca-desi-LG(Chr)3 | 16545023                | TACTCTTGCTTGTGTTTGTGCCAAATACAAGAA<br>CCCAAATGCACCAACTATAGCCCGAGTTTCCCT<br>GCTGCTGATGATATCCATGACAAGTAGATC      | T         | G       | GCGCAAGAGTGGAAAGGGAGGGAAGAGGA<br>GGAGGTGTGAAGAAGAAGAAGGAAGGTG<br>AATTTGGATGCAACGAAGCCTTAGAAGATCTT<br>TCTTTCTTCTATCTCTCTACAGAGGAATCGT<br>AGATCTGATTTCTTTCTTTCTTTTCGATCA<br>ATTTCTTTGTTAATCAGAATTTACTTCAAGAAAA<br>ACAATGGGATTGTGGGAAGCTTTTCTGAATTGG<br>CTCCCAAGCTTTTCTCAACAGCAATGAC | NA                         | NA                          |

| Marker IDs   | Genetic positions (cM) | Chromosomes      | Physical positions (bp) | Flanking sequences/Forward primers                                                                           | ICC 12968 | ICC4958 | Flanking sequences/Reverse primers                                                                                                                                                                                                                                                                                          | Annealing temperature (0C) | Amplified Product size (bp) |
|--------------|------------------------|------------------|-------------------------|--------------------------------------------------------------------------------------------------------------|-----------|---------|-----------------------------------------------------------------------------------------------------------------------------------------------------------------------------------------------------------------------------------------------------------------------------------------------------------------------------|----------------------------|-----------------------------|
| Ca-II-SNP543 | 216.45                 | Ca-desi-LG(Chr)3 | 16680965                | ACTTTGAAAAGGTTAAAAATGTTAACTCTTCCCATA<br>TGATGTATCCTCAATTCCTTCATGGTTTTTGTGG<br>CTCCAAAATCACACTAGTTGGTTCTTAA   | T         | G       | CAACCACCAATATCAAATATTATTGGTCAGAA<br>ATATTATGAATGTACAGGACATAAAACCAATAT<br>GGCTATGGCCAGTCTCTGACATTTGATTCAGG<br>G                                                                                                                                                                                                              | NA                         | NA                          |
| Ca-II-SNP544 | 217.46                 | Ca-desi-LG(Chr)3 | 16719937                | ACTCTGCTGTATAAGACCACCAACTGCGTGACAC<br>CGTGTACACCTAGTATCGGGACCAGCATCATGAC<br>TAGGACCAGCATCAGGACCAGGACCAGGACCA | G         | A       | GAGTGTGTTGAGGGATACATTCAGTGGTATTAT<br>AAGATATCTCATCCTCGGATGATCCCTTATGTT<br>GCTGCATATGCTTGTCTTGTATGATGCTGAT<br>G                                                                                                                                                                                                              | NA                         | NA                          |
| Ca-II-SNP545 | 218.47                 | Ca-desi-LG(Chr)3 | 16978563                | GTAATTTTATCGTACTCTAAATATTTTGTACTCT<br>TTGTTGAGAAATTTCTGATACTAACATTAATTA<br>GGAATTGTTGTTATCTTCTAAATTGATG      | T         | A       | ACCGATACTAAAACAAGAGACTTCTGAATTTGG<br>ATTCCAATTCGAATTCAGTGCATATCATCGTA<br>TTAGAATTACAAAATTCCAATTTAAAAGCTAA                                                                                                                                                                                                                   | NA                         | NA                          |
| Ca-II-SNP546 | 219.48                 | Ca-desi-LG(Chr)3 | 17008520                | AATTGGTCATTCCATTTCTCATGTAATAGAAGTTT<br>ATTTTTGTCTTAAAAAATCTTTTATTTTTAATTTA<br>TTTTCTTATTTTTAATTGGCCATTA      | G         | A       | ACGATCTTTGTCCACGATACAATTTAATGGTCA<br>ATTAAAAAATTTAAAAATAAATACAAATACACCAC<br>GACTTACAGTTTTTTCATGTATCCGTTGAGAAG                                                                                                                                                                                                               | NA                         | NA                          |
| Ca-II-SNP547 | 220.49                 | Ca-desi-LG(Chr)3 | 17116615                | CACATTTAAAACCTTTTTCTATTAATGGTAGGGGC<br>GTACAAGACCCGGTTCGCCGCGAATCCGACCT<br>GACCCATAAGCAACGGGTTGTCTGACCCCG    | T         | C       | TTTTTTTTTATGCAGACACTACCTCTCATTCTG<br>AAAATAGACAATTTCAAAAATCTGCATTACAAAT<br>ATGAAAGTTAATCATTATCATACTTAAAAATAA<br>AGTTAAACTCTGAAAGAAATAGTTTCAAAAAGTT<br>CAGGTCGCCAATCCCGCTGCCACAAAAGCTG<br>CTTAACGATTCCGCTTAGCAACTCTCTCAATTT<br>CATCTTTTTCTTATTGATGCATAGCTGTTGGATG<br>AAGCTTTCTCTCAATTAATACTTCATACCAAA<br>GTGCCAATTCAGTCCTTGT | NA                         | NA                          |
| Ca-II-SSR138 | 221.50                 | Ca-desi-LG(Chr)3 | 17212326                | TTGGCATCATCAAACCATGT                                                                                         | (AT)9     | (AT)11  | GTGCCAATTCAGTCCTTGT                                                                                                                                                                                                                                                                                                         | 59.78                      | 114.00                      |
| Ca-II-SNP548 | 222.51                 | Ca-desi-LG(Chr)3 | 17288468                | TAAAGCCTACTATCCAAAAATGTTCTACCTTTACC<br>TAATCCCCATTACAACCCGAAAGTCTCCAAAAGT<br>GTATGTGTTTGTGCATTGTGATTGCTAAC   | T         | A       | ATCTCACAAAATTTCTCTCAATTGTTTAGCAAA<br>GGTTATGAATTTTACTCAATCCTAAAAACATG<br>CATCACACTACCATTGCCATAAAAAAATTCT                                                                                                                                                                                                                    | NA                         | NA                          |
| Ca-II-SNP549 | 223.52                 | Ca-desi-LG(Chr)3 | 17313806                | AATCTCACGGTTGTGAGGATTAGATGTAACCCGG<br>GTTAGATGAACCAGAATATATCTGTGTGATATC<br>TTTTCCCTTATCTCTATTTATTTCTAGTCTT   | A         | T       | TTTAACTCAAGATTAATCTTGATTATGAAAATAG<br>AAAACGGAGAACGTTATTGGTTAGTAAAAACAC<br>ACAAATTAACCTTATCTATTTAATTTGATAATCA                                                                                                                                                                                                               | NA                         | NA                          |



| Marker IDs   | Genetic positions (cM) | Chromosomes               | Physical positions (bp) | Flanking sequences/Forward primers                                                                          | ICC 12968 | ICC4958 | Flanking sequences/Reverse primers                                                                                                                                                                                                                     | Annealing temperature (0C) | Amplified Product size (bp) |
|--------------|------------------------|---------------------------|-------------------------|-------------------------------------------------------------------------------------------------------------|-----------|---------|--------------------------------------------------------------------------------------------------------------------------------------------------------------------------------------------------------------------------------------------------------|----------------------------|-----------------------------|
| Ca-II-SNP550 | 224.53                 | Ca- <i>desi</i> -LG(Chr)3 | 17346792                | GGATTAATCTAATAGCTCCAAAGTGAAGTTGTG<br>TATCCTTCATTTTTCCAATGATTTATAAGATTCTGT<br>GAAATCTCTAAATCAACATACTGCTCTTG  | G         | A       | TCACCAGATCTATCAGAAACCTAATCACAAC<br>GCCGTCCTCACATGAAAGAATATGTACAATCTT<br>CACGACTTGATCAGTGCAAGCCTCAGAGCGACA<br>AA                                                                                                                                        | NA                         | NA                          |
| Ca-II-SNP551 | 226.55                 | Ca- <i>desi</i> -LG(Chr)3 | 17415276                | TTATAGGTTGTTATTGTTGATTGATTCCTTATT<br>GTTATTATGAAGACTCTCGGTGTACCCATTAATTA<br>TTATAGTGGAAGTTTTACTGGACTAGGTC   | C         | T       | ACAATTCGAAGCAATAATAATTGGCAGAAAA<br>TTAAATATGAGACAAACACAATTTAACGTGGA<br>AAACTTCCCTCAAATTGAGAGAATAAAAAACCAC<br>G                                                                                                                                         | NA                         | NA                          |
| Ca-II-SSR139 | 227.56                 | Ca- <i>desi</i> -LG(Chr)3 | 17637329                | TCATCAGCAAAATTAACACATTAATA                                                                                  | (TA)9     | (TA)10  | GGAGGGAAGAAAAATAAACAAACA                                                                                                                                                                                                                               | 59.09                      | 142.00                      |
| Ca-II-SNP552 | 228.57                 | Ca- <i>desi</i> -LG(Chr)3 | 17645419                | TTTGTGGTACTTTCTTACAGGTAATCAACAAGAA<br>AAAAATGTTCAAGTTATGACATTTGGACAACCTCG<br>TATTGGGAATGCTGTTTTGCATCTCTCT   | G         | C       | GACAGATTGGTTCGGAGCGAATTATACAGGCT<br>CGAGTGGACTACCCTCCGCTTCGGGTCCAAC<br>CAACTGGTCCGATTCCACATCAGCAGTGTAC<br>ACCCACGAACCACCAATTTGATCTCCTTGCTCG<br>AAAACCACCACGCGATGTCCTTCTCTCGGAG<br>CTCGCGCGCCG                                                          | NA                         | NA                          |
| Ca-II-SNP553 | 229.58                 | Ca- <i>desi</i> -LG(Chr)3 | 17729360                | AGATTTGTCAGTCATCCTATTTGTTAGGATTTTT<br>GGGAGTTCACCAGCAATAATAAGTCAATTGTTCA<br>AGATCTATAATAGACTTTGACACCACATCT  | T         | C       | AATTGTCAAATTTCAAGTGTGAGTGTTAGTCT<br>CATCTCAACAATGAACAGATATATAAATATGTA<br>ACTTATATATTAATGCCTTAAGATTTGGATG                                                                                                                                               | NA                         | NA                          |
| Ca-II-SNP554 | 231.60                 | Ca- <i>desi</i> -LG(Chr)3 | 17860954                | AAATATTAATTTTTGTCTTTTCTTTGTCGGTAAT<br>TGGATGGTACGTACACTTGCATGTGTCTGTATG<br>TTTAACGCAAAATTTTACTCAAAATAA      | G         | A       | CCAGGAAGCATTTCGAGGAATTTAGGTGAGA<br>CTACTAGAGACTGGAACAACCTCATAAGAGGA<br>TGCATCAGTCTATTTGCCTTGAATTAACCTCT<br>CCTTCAACAAGGTATGTGCTCTGTAGTTGATCA<br>GAAGAAGATTAAGTGGATTGGTTGAGGTCTGCA<br>GGCCAAAAGGGATACACTAACAAATGTTGCTAG<br>TTGTAGAAAATGATAGATGGAACGTAAG | NA                         | NA                          |
| Ca-II-SNP555 | 232.61                 | Ca- <i>desi</i> -LG(Chr)3 | 17992109                | CCAAAGAAGCTCTTTCATATGTCCTCCAGGATACT<br>TTTTTTTCCAATTCCCATACAAGTGTAAACACATA<br>ATCGGTGTTCCACATGGGCCTCAATGTTG | C         | G       | TGCGTGTGAAGTCTATGATGAATAATATGTTT<br>TTAAGCAATCTGTTTTAAGCAATTTGTTTGTA<br>ATATTCTGTTTCAGGAATTTGTTACCAGCCATTG                                                                                                                                             | NA                         | NA                          |
| Ca-II-SNP556 | 233.62                 | Ca- <i>desi</i> -LG(Chr)3 | 18039669                | TGAACACAATTTAAACACAATACATGTGACCTC<br>CACATAATCTCTATTCAATTAATTTCTTTTTCTTT<br>TATATTTCTTTTATTTATTTATCTTTTT    | G         | T       | AATTATTTCTGTCCAAAGGAAGAAGAAAGGAGA<br>AATTATGGAAGAAAGAAAAGATGAATGTGTGAG<br>GTTTTTTTTGTAGAGGAAGACAAAAAAAAGT<br>G                                                                                                                                         | NA                         | NA                          |

| Marker IDs   | Genetic positions (cM) | Chromosomes               | Physical positions (bp) | Flanking sequences/Forward primers                                                                          | ICC 12968 | ICC4958 | Flanking sequences/Reverse primers                                                                                                                                                                                                                                                             | Annealing temperature (0C) | Amplified Product size (bp) |
|--------------|------------------------|---------------------------|-------------------------|-------------------------------------------------------------------------------------------------------------|-----------|---------|------------------------------------------------------------------------------------------------------------------------------------------------------------------------------------------------------------------------------------------------------------------------------------------------|----------------------------|-----------------------------|
| Ca-II-SSR140 | 234.63                 | Ca- <i>desi</i> -LG(Chr)3 | 18078319                | GTAGTGGGGGCACAAAACAT                                                                                        | (TAA)9    | (TAA)8  | TGGGTGGGATCCATTTCTA                                                                                                                                                                                                                                                                            | 59.72                      | 167.00                      |
| Ca-II-SNP557 | 235.64                 | Ca- <i>desi</i> -LG(Chr)3 | 18086914                | TATTAATAATTTACAGTTTAACTTTTTGTATTATATG<br>CATGTATGGTTGTGTAGCTCAATCCCTTTTGTGC<br>TTCTATTTTTCATAGTGTGTCAAATAGC | C         | T       | AATTTCTTCAATTGAGGAAGCTAATAAGCTAGC<br>CTTATATATGGCTCAAGATCAATGTGGAGGAGA<br>TATATCAAATTCAAAGGGAAGCTTATCAGAGTC<br>TGTTTCACCACAGGGTCTTTAACTCCTCTTCT<br>CATTGGAGGATCTGTT                                                                                                                            | NA                         | NA                          |
| Ca-II-SNP558 | 236.65                 | Ca- <i>desi</i> -LG(Chr)3 | 18170249                | TCTATTACGCTTCTATATTCATACAGATCTATTGTA<br>TATCTTCAACAAATTTACTCTCACATATCTCTTC<br>TGTGCGAGAATTTGTCATGCGGTTTTT   | T         | G       | AAGTCAACAAAACATTTTTTAAACAGAAAAATAA<br>TTTATAATTTATATAAAAATAAAAAATAAAGAT<br>TCTCCACAAAATTTAAACAGCTTCAATTTT                                                                                                                                                                                      | NA                         | NA                          |
| Ca-II-SNP559 | 238.67                 | Ca- <i>desi</i> -LG(Chr)3 | 18207408                | GGGTACATTTGGGTTGTACACTCTTCTGTCTT<br>TTATTTGTCCCTATTCCTGCATAAAAGGACTGTATAT<br>ATGACTTATGAGTTGTCAAGCCAATAATT  | T         | C       | ATAATAAGAATTCAAAACATATACATCACTTC<br>GTTTCGTTCAACATTCAGTACTTGCATATTGAG<br>GAGCAACGTAGCTGCCAAAATAAGAATAAGTAT                                                                                                                                                                                     | NA                         | NA                          |
| Ca-II-SNP560 | 239.68                 | Ca- <i>desi</i> -LG(Chr)3 | 18262067                | TATTAATAATTTACAGTTTAACTTTTTGTATTATATG<br>CATGTATGGTTGTGTAGCTCAATCCCTTTTGTGC<br>TTCTATTTTTCATAGTGTGTCAAATAGC | G         | C       | ATTGAAATAGTGGCCGCTATTGTCTAAAATCG<br>AAACTAGGATGGCGTACGGTTTTTCATAGTGG<br>ATTCATCAAAATCCGCTATGCTATAGCGCTATC<br>GC                                                                                                                                                                                | NA                         | NA                          |
| Ca-II-SNP561 | 240.69                 | Ca- <i>desi</i> -LG(Chr)3 | 18313268                | TTCTTGGTGCAATCTTCTCTAACCTTAACTCCTTT<br>GATTTACTATATTGCTATATTTGTATATGTGATTA<br>AACTAGATGCATGTTAAACATATTCTGT  | G         | A       | TTAAATTATGGCATAAAGATTAGCAAGTTTTAT<br>TAGATTGATATGAGATTAACCAAGATGCATACA<br>AGTCAAATTAACAGATTAACAATATTACTTAT                                                                                                                                                                                     | NA                         | NA                          |
| Ca-II-SNP562 | 241.70                 | Ca- <i>desi</i> -LG(Chr)3 | 18363296                | ATTAAGAATTTGAAATTGAATTGGAATTAGAATG<br>GAATCCTCCCTCTTTTTTGTGGTTTTATTTTTAT<br>TTATTTTTAATGGTAATTATGTATGTAT    | G         | T       | CGCGCATCAACACTCTCTCACACACCACCAC<br>ACCTACCTTCTCTTCTCTCTTTTCTGAAAAAT<br>CGCAGAAAGCACTAACACCTGAAAAGTGATTGT<br>GAGGTGTGTGGAATCGCAGTCTCAGAAGCACG<br>TACTTGCTGAGTTAAATCAATGGAGATGGTTC<br>AGGTAGGTGTCAGGACACGAGCTCAAGCGGCA<br>TTAGCCATGGAAGCTTCTAGTTCAAGTGCACGA<br>ACTAGAAAGCAGCAAGCAAAATTCAGACACACA | NA                         | NA                          |
| Ca-II-SNP563 | 242.71                 | Ca- <i>desi</i> -LG(Chr)3 | 18445099                | AATGCATCCAAACAGGAGAGACAGTGGTTGTTT<br>CGGAAAACTTTTCTAGCAGCGACGGCAGGCAGCA<br>GCAGCAAACGGCGGCGGGCAGTAGCAGACG   | G         | A       | TTCCCAACAGTTTTGGGAATATAATCCTAGTTTC<br>TCTTTTCTAGCATGATCATTCTTTTTCTGATGA<br>CTATCACTTCCGTCCACAATCGTCTGCTGCTGCC                                                                                                                                                                                  | NA                         | NA                          |

| Marker IDs   | Genetic positions (cM) | Chromosomes               | Physical positions (bp) | Flanking sequences/Forward primers                                                                           | ICC 12968 | ICC4958 | Flanking sequences/Reverse primers                                                                                                                                                                                                                                                     | Annealing temperature (0C) | Amplified Product size (bp) |
|--------------|------------------------|---------------------------|-------------------------|--------------------------------------------------------------------------------------------------------------|-----------|---------|----------------------------------------------------------------------------------------------------------------------------------------------------------------------------------------------------------------------------------------------------------------------------------------|----------------------------|-----------------------------|
| Ca-II-SNP564 | 243.72                 | Ca- <i>desi</i> -LG(Chr)3 | 18525106                | TGAGTTTTAACTACAATTAGAAAATCGATTGTTCA<br>TCCTTCTGTTTTCTTAAATCACTTCTGATTCTTTCA<br>TCAACTCAATGATTTCTTCTCACCT     | A         | C       | ATCCCCATATGTTTTACCTGTCTTTCAGGAATA<br>AAACGTGTACAGTCATTCTTAAGGAAGCTTACT<br>GCGATGAAGCAGCTATCGAAAACATCCTCTAT<br>T                                                                                                                                                                        | NA                         | NA                          |
| Ca-II-SNP565 | 244.73                 | Ca- <i>desi</i> -LG(Chr)3 | 18630974                | CTGACTCTCAGTGTTTTTTTTCTTCTGTGAGAT<br>GGCTATTTTTACTTCTTTTCATGTTGGCCGCGTC<br>TGTCTTTTTCTGCATTCCITCTCTTTCAG     | A         | C       | ATAAGTGATCAGGATTTGGTCAAGGAAGTTACT<br>AAAACTAACCTAATTTAATAAATGAAAAGCAA<br>GGCAAAATCGTACCCTAAAACAAACATAAGCGCC                                                                                                                                                                            | NA                         | NA                          |
| Ca-II-SNP566 | 245.74                 | Ca- <i>desi</i> -LG(Chr)3 | 18732969                | GGAACATATTCTCAAACCTCTGGTATATAACTTGA<br>GAAATAACTTGATTTATCTTTGCCCTTTAGTTGA<br>TTCGACCAATCCATATCGAGGTTAAATG    | C         | T       | ACTGTCCTGGTTAAATTGGCAAATTTTCCCAG<br>AGCAGAAACTGCATTGTCATATGCCATTACATT<br>ATCTGAATGAAGTGCATAAGGATGTTGGATCAC<br>A                                                                                                                                                                        | NA                         | NA                          |
| Ca-II-SNP567 | 246.75                 | Ca- <i>desi</i> -LG(Chr)3 | 18804984                | CTAGTTAGGACTTAGGACTACTGAATTATTAGT<br>TATTTTGAATTTGGGATTTAGGGCTGTAGGCAATAT<br>ACACTTTCAAATTTCTATTTAGGGCTGTAG  | A         | G       | AAAAAGGCTCATATTAATCAAAGCAAAAAAC<br>CTCACATTAATCAAAGCAAAAAACCTCAATAA<br>TTCAAACAACATAATAAAGATGTTGCATCCTA                                                                                                                                                                                | NA                         | NA                          |
| Ca-II-SNP568 | 247.76                 | Ca- <i>desi</i> -LG(Chr)3 | 18996239                | AAGCTGCGAACGACACTAATGAAAATAGGCACTCT<br>AATGCTAGTTACTTCGTCGACGACACATCTGAGAT<br>CGTCGTTTCGATGTCGCGCATGTCATGTAA | A         | C       | ATTATTAGTATTATTGTAACCCCTAATTATTG<br>AAAAATAAATAAATTAAGTAAATAGAAACCTTT<br>TTGCCATAAAAAAAGTAGAGAGTATCTATGC                                                                                                                                                                               | NA                         | NA                          |
| Ca-II-SNP569 | 248.77                 | Ca- <i>desi</i> -LG(Chr)3 | 19078905                | GGTAATTCCTTTTCTCTGTTTTATGTCCTTCCCT<br>TTGTTGGTTAACTGTTTACTATTTAACGGTCAA<br>TATTATTGGTCCCTGGTTCAAAGTTTAC      | T         | A       | CTTCCCTTCTCGTCGTCCTGCCCATCCCTT<br>CCTCTATTTCCCTCTCTTAATCATGTACACCT<br>CAACACGCTTTTCTATCTCTCTCTCTTTCAT<br>TCAAATGTGAATGATAATTTCTCTTATATCCA<br>AATTTTTCCCTTGCTATTGATCCACCATTTTATT<br>ATTTTATTTATTTAATTAATCCCAATCATGGG<br>TATATGTTTCTTCAACAAAGTTGTTAGCGG<br>CTTAACACTAACCAACAAACAGCCACAGC | NA                         | NA                          |
| Ca-II-SNP570 | 249.78                 | Ca- <i>desi</i> -LG(Chr)3 | 19594047                | AGATTTGTCAGTCATCCTATTTGTTAGGGATTTTT<br>GGGAGTTCACCAGCAATAAAGTCAATGTTTCA<br>AGATCTATAATAGACTTTGACACCACATCT    | C         | T       | GTTGCTTTAGCCTTATTAGTAACATTTGTTAGA<br>ACAAAACCCTAGTTCAAAGAGTATAGATACAA<br>AAAACGCAAAAAACAGCTAGATTTGACCGCG<br>GAGTTTTGTGTCCTGATGCTTATCAATAAAC<br>TAGAGTCTTATATCCAAAAAAA                                                                                                                  | NA                         | NA                          |
| Ca-II-SNP571 | 250.79                 | Ca- <i>desi</i> -LG(Chr)3 | 19929129                | TCCTACTCTGAACAATATTCTGAATGCCCTAC<br>TTTTTCGTTCTTTCAGGAAGTCGTTCCCTGGGGAA<br>GCGACCTCTGAAGAGGAAATTTTTAATG      | G         | A       | AAACAATGGCGGGACCTGACCCCTCTCCTTCT<br>CCAAAGATCCTTAGCAAAGCCAGCACTCGTC<br>ACCGGAGGTACAGTCGCGGTAATTCAGTCG<br>TGGCGGCGCCGCGAAGAAGATTCTTCCGAGC<br>TCCGTTCCCGTCTTCTTCCGTCCGATCCCTCA<br>ACCTTCTCTCCGATTCTGGGATTTCCACTTGG<br>ATCGCTTCTCCCTTTTTGACTGAGAATACTG<br>ACTCACTCTCATTCCACTGATTCACCAACC  | NA                         | NA                          |

| Marker IDs   | Genetic positions (cM) | Chromosomes               | Physical positions (bp) | Flanking sequences/Forward primers                                                                            | ICC 12968 | ICC4958 | Flanking sequences/Reverse primers                                                                                                                                                                                                                                                                  | Annealing temperature (0C) | Amplified Product size (bp) |
|--------------|------------------------|---------------------------|-------------------------|---------------------------------------------------------------------------------------------------------------|-----------|---------|-----------------------------------------------------------------------------------------------------------------------------------------------------------------------------------------------------------------------------------------------------------------------------------------------------|----------------------------|-----------------------------|
| Ca-II-SSR141 | 251.73                 | Ca- <i>desi</i> -LG(Chr)3 | 20233763                | TCITTTTCTCTTATAAATTGTTGACCT                                                                                   | (AT)12    | (AT)11  | CTTTCTCAAATAAAGAGATCTCACA                                                                                                                                                                                                                                                                           | 57.42                      | 118.00                      |
| Ca-II-SSR142 | 253.61                 | Ca- <i>desi</i> -LG(Chr)3 | 21486044                | TCGTTTCGAGTTCGATTTTCC                                                                                         | (AG)7     | (AG)9   | CCTTGC GTTGGTTCAATTTT                                                                                                                                                                                                                                                                               | 60.19                      | 128.00                      |
| Ca-II-SNP572 | 254.55                 | Ca- <i>desi</i> -LG(Chr)3 | 21603729                | GGGTACATTTGGGTTTGACTACTCTTCTGTCTTT<br>TTATTTGTCCTATTCTGCATAAAAGGACTGTATAT<br>ATGACTTATGAGTTGTCAAGCCAATAATT    | G         | C       | TAGCACTTATTTGGTGTAGTGCTATGATTTT<br>GGTTGAATCTCCATGTAATGTATTATTATAAATTG<br>GAGCAGATGACATTCTTGCCCATCTGCGCCAA<br>TAAGGAAGTCATGTATAGTTCGAGCGGGAATTA<br>AAATGTAATAGTTCAATTAATAGACTCAGTTCC<br>TGTTTACTTTCAGGAAAAAGTTCAAGTTCTTA<br>GTTAAAATAGCATGTTTGTAGTAATAGTGGTTTAC<br>ATGCTTCTCTACATCAAT               | NA                         | NA                          |
| Ca-II-SSR143 | 255.49                 | Ca- <i>desi</i> -LG(Chr)3 | 21727270                | GGGTTGAGAAATTACGGGTG                                                                                          | (TG)14    | (TG)12  | GGGAGGAAACATTTTCGTTTT                                                                                                                                                                                                                                                                               | 59.29                      | 174.00                      |
| Ca-II-SNP573 | 257.37                 | Ca- <i>desi</i> -LG(Chr)3 | 23020307                | TTTTAGTTTTGGCAGTTATGATCTATAATGGGCAT<br>GCGGTGTCACACTGTCTATGTACGTGGCTGTCTC<br>CTTGTTGGTTTAGGTACACACAGACAGGCACA | A         | G       | GCAAAAATGGTAATATTACAATATTAGCCCAA<br>AACCTGAGGGGAATATGATATGAACTACATTAA<br>GTGATAATATATACAGCTTCTCATGGATGGGAA<br>TGTGGTTCTTATTTTCAGCTGTGTACATAAAAG<br>TTGGAAGACTAAGCCTTCAAACAATACTAGT<br>TAAACTCGCTGATAAATAAATTTCTCTAGGA<br>GCAACTACAATCTTACTTTACATTCATCCATCAGTA<br>GCTTTTCCACATGATTTTCCAGCCTCCATGCA   | NA                         | NA                          |
| Ca-II-SNP574 | 259.25                 | Ca- <i>desi</i> -LG(Chr)3 | 23034508                | TTCCCGATTTTGTAAATCAGTCTCACAAAAACAT<br>CGATTGCGCATTCAATTAAGCGTTGGATCGGGCTG<br>ATTTTTGGACAGAAGGTTTCGAAAAATTCAGG | G         | T       | TTAAACAACAATGTGGCTCCTGTTATTGAATTAT<br>AAATAATATTGCTCCTGCTAAGAATGCCATCAT<br>CTCATCTCATACATACATCTCTCACACATGACT<br>ACTACAATACTACTATACTATTATCAAGCACT<br>CTTACCAAGAACATCATGGACAAACCCCTCATG<br>AATAGGATTAGTGGTAATGCTTTTATTAACCATA<br>TGCAAATCTCAAATAATAAGACACTGACTGAAC<br>TATAAATAGACATACATGATCTTACCAATCT | NA                         | NA                          |
| Ca-II-SNP575 | 260.19                 | Ca- <i>desi</i> -LG(Chr)3 | 23165300                | CTCATGTGTTTGCAAAGTTTATTTTTTAAAGTGC<br>GAACGTTATGCATGCAGGTATCTTCTATTGTTTCA<br>AATCACCTGTCTCAAGCAAGGAGGGTCCC    | A         | G       | ATGAAGTCAATAAGCATACATGAAAGAAAAAAC<br>CCTAGCTCTCACCTAATAATAATAATAATAAT<br>AATAATAAACAGCTCTCCACATAGCAACATTTT<br>GTACAGTCATCGCGTCAACTTATAAACTACTAG<br>CTCATATCACCACCGTTTCATGAAAACTTTAC<br>ATTCTTAAAAACCAACCTTGCTTCTTGATTAG<br>TCATTTTTATCTTCCACTGCAGGGGACCTCACC<br>TCACTTAAATTTCTATCTATAAAGTACACAACTCA | NA                         | NA                          |
| Ca-II-SNP576 | 261.13                 | Ca- <i>desi</i> -LG(Chr)3 | 23338444                | GTCTCTCGTTAATTTTAGGGAGCATCTCCAGCAG<br>AAATGATGATGATTATGATTGGGCATACCTCTA<br>CTCGACGTGCATATCAACTATCTAAAACATA    | A         | G       | CTAAACTTCTGAGAATCTGTAACATATTTCCAA<br>GAAATACCAACCAACCAAAAGCTTATTCAAAG<br>AAATCTATCCCAATACAACAGAAAGTTGTACA<br>GACAGAGAGACCTGAATCAGGAATCATGAGTTT<br>CTCGACTAATGATTGCAGGCAGATACATCATTT<br>TATAACCATCCACTGAGCAAAAAACAACTATGC<br>CGTGGATTACCTTCTTCCCTTGCATCAATTC<br>CATCTACTACACCCCATCTCCAGCCCTCTC       | NA                         | NA                          |

| Marker IDs   | Genetic positions (cM) | Chromosomes               | Physical positions (bp) | Flanking sequences/Forward primers                                                                            | ICC 12968 | ICC4958 | Flanking sequences/Reverse primers                                                                               | Annealing temperature (0C) | Amplified Product size (bp) |
|--------------|------------------------|---------------------------|-------------------------|---------------------------------------------------------------------------------------------------------------|-----------|---------|------------------------------------------------------------------------------------------------------------------|----------------------------|-----------------------------|
| Ca-II-SNP577 | 0.91                   | Ca- <i>desi</i> -LG(Chr)4 | 86182                   | CTCGTCGCGATCTCTATTTGCGCTCCCTTTCTATC<br>TGTTGAGGTTTGGATTGATAGAAAGAATACGGTGT<br>TATTCCTTGACGAAAGTAGAAAGAAGACTGG | C         | G       | TTATTGATACATTTATTATATTAATATATTACTCT<br>TGCTATGTGTTTTTCACTAAAAGTGTGAGTCCC<br>TACTCACACTTTTATTTGTAATATAATAAAA      |                            | NA                          |
| Ca-II-SNP578 | 2.12                   | Ca- <i>desi</i> -LG(Chr)4 | 107312                  | TACAATAAATATTTATCGGTAGAATAATCTTATTC<br>GCCAGAACATTATAGCCTTGTCTGCTGCTTGTCTA<br>TTATTCTATAAGTAGCGTGTTTATGTGT    | G         | A       | ATGGAGCACGAACATAGGTTGGCATGCATACG<br>TGGATAAAGGAAACATCGCGATATAGAGGAAAA<br>TCAGACCAAACGTGAAGGCCACGTACACTCA<br>GTT  |                            | NA                          |
| Ca-II-SNP579 | 3.33                   | Ca- <i>desi</i> -LG(Chr)4 | 115020                  | AATTTTATCTATATTGCAAAAGTTTTGCTCTCAT<br>AAATTTTGACTCGGTCAAGTTGCTTTAGATATGTT<br>TTTATGATTTAATAGACTCATTTTTAAAA    | T         | C       | ATAAAGGTGTATAAAGAGTTACAATAATATAAA<br>CTTTTTAATGCATTTTTGGCTCCCTATTTCAATTT<br>TATATTTAAAAAAGATGAGTTGTCAATTGTT      |                            | NA                          |
| Ca-II-SNP580 | 4.54                   | Ca- <i>desi</i> -LG(Chr)4 | 130269                  | AATTTAGTGTTCATTTTCATAGTTTGGTATACA<br>AGTATATGATTTTTATCGAATCACAATTTCTATTCTA<br>TCCTTTTTATTTCAATTAGCAGTTATA     | T         | A       | TGACACAAATTTGCAATACCATGATGAAAGATA<br>TCTATCTATGTGTTTACATATCACAAATTTATTC<br>GGATTTGATTCTTTAAAGAGGATAAAGTGAAT      |                            | NA                          |
| Ca-II-SNP581 | 5.75                   | Ca- <i>desi</i> -LG(Chr)4 | 152022                  | ATGCTGATTGTTGTCTTCTTGTGTTGTTGTGAT<br>TTCTTTGCATGTGTGGTGAAGGTGAATTGCTTCC<br>AGCAGATAGAGGATTAGCAAGCCTCCTTT      | A         | G       | CTAGACAAGCAACTAGTGTAGAATTATCAAAGA<br>GAAAATCTTTAAAGATTGAGCCTCAGGAAAGC<br>CTCCTCTAAGCACACATCAGGGTGTCTGTTGAG<br>AA |                            | NA                          |
| Ca-II-SNP582 | 6.96                   | Ca- <i>desi</i> -LG(Chr)4 | 173850                  | GGTTTAGGGATAGAGCTGTGATAAAAATGTCTA<br>CAGTTTGTGGGAATAAGACTGCCACAAATATCTC<br>TTTGTGAGGGCTTAGACCGCACAAATGAT      | G         | T       | ATATAATATTTAATTTAATTTAATTTTCAAATTAT<br>ATAAATATTAATTTTTATATATAATATTAATTTT<br>GAAGTTTATAAAATTATTATTTATTTATTA      |                            | NA                          |
| Ca-II-SNP583 | 8.17                   | Ca- <i>desi</i> -LG(Chr)4 | 197709                  | AACCTGCATATATGATCATGCCCAAGGATGTTTCA<br>TTTTCTTTATTTAAATGGATTTTATGTGGAATGACA<br>ATATTTGCTGATTGTCAATATAGTAATTC  | A         | C       | CTGTGCAGAGATCATTGAACAAGACTAGATAAAA<br>AAGAAATCACTTGTCTTTTCTTTTGTGTTGTTAA<br>CATTAAATCATTCTAGAGTTGAACAACAAAAGTT   |                            | NA                          |
| Ca-II-SNP584 | 9.38                   | Ca- <i>desi</i> -LG(Chr)4 | 212618                  | TTTTATCTTAAGTCTTTGTGAACCTGCTCTAAGTA<br>TGATGTTCAACACATTGTATTCATTTTTTTCAATTT<br>TAATAAATTAGGTATATTTAGTACATTT   | C         | A       | GTAAAGATCTAAAAAATGGTTAGATTAATAATTT<br>ATGATGGATTATAGTTAATATATATAATCTGTTT<br>CTTACTGTTATTACATAAAGAAAGTTGGAAA      |                            | NA                          |

| Marker IDs   | Genetic positions (cM) | Chromosomes               | Physical positions (bp) | Flanking sequences/Forward primers                                                                           | ICC 12968 | ICC4958 | Flanking sequences/Reverse primers                                                                                | Annealing temperature (0C) | Amplified Product size (bp) |
|--------------|------------------------|---------------------------|-------------------------|--------------------------------------------------------------------------------------------------------------|-----------|---------|-------------------------------------------------------------------------------------------------------------------|----------------------------|-----------------------------|
| Ca-II-SSR191 | 10.59                  | Ca- <i>desi</i> -LG(Chr)4 | 217545                  | TCCAAACAAGTGGAGATGC                                                                                          | (AT)6     | (AT)8   | TTTATAAGTGTAGGCAATGACCTG                                                                                          |                            | 58.70                       |
| Ca-II-SNP585 | 13.01                  | Ca- <i>desi</i> -LG(Chr)4 | 246041                  | GGTTTCTGGAAATTGCCTGATGATTGGAGTTTGG<br>CTCAGAAATTGATCTTGAAGGGTGTGAGCCTTTA<br>CCTAGAAGAAGGTGTTTGTCTAAAACCTGTT  | C         | T       | TCAAAACCTCTACAATTTAAACCACTCCAATTA<br>CACTCTTATTATTATTACCAACACTTTTCCAAAG<br>AGAAATAGGAAAAGGAAAAAGACCAACCTTTG       |                            | NA                          |
| Ca-II-SNP586 | 14.22                  | Ca- <i>desi</i> -LG(Chr)4 | 258002                  | AATGTGCATACTGTCAGCTGAAAGTACCGACGAA<br>GGCAGCGTTGTCTGTTGACGTTAGCACGCCTTA<br>CACCAACTCGCAATTGCGATTTCTCATCCCTT  | A         | G       | ATAGGTAGAATAACTTCCGATCGGTAACCTTATT<br>ATTTTAAAATTTGACAAGTATCTTTACGCAATTT<br>ACTTCAAACATAAAGTGTGATGTGCAATTGTTA     |                            | NA                          |
| Ca-II-SNP587 | 15.43                  | Ca- <i>desi</i> -LG(Chr)4 | 282233                  | TCTTACTTATATATTGTTCAACATTCGCTTTTCAA<br>TCAATGCGAAACTTTTTACTCACACTTGATACCAA<br>TAAATCTTTGTGAGTACATCCATTCATAT  | G         | C       | AATGGAGTTCGGACAACGTGCTTGTGATGCA<br>GCTTACGATGGTGAAGTGAATGAAGATGGAC<br>AAAAAAAAAATCTTTATTTAAGGGAGAGCCTA<br>CC      |                            | NA                          |
| Ca-II-SNP588 | 16.64                  | Ca- <i>desi</i> -LG(Chr)4 | 307143                  | CTATCAATTCGACAACCTATTTATTTCCATGTTA<br>TCAATTTACGCTGTTATTTAGCTTTTTTTCAGTGG<br>TATACATAAAAGTGGTCAAGGACAACAA    | G         | A       | TTTATTTTTAAATAAAAACTATTAATGTTATTTT<br>TTGAGAAAACTATAATTTTGTGTTCCACTACAGT<br>TATTTAATTTAAACATTAACCTGAGTTTTTTA      |                            | NA                          |
| Ca-II-SNP589 | 20.27                  | Ca- <i>desi</i> -LG(Chr)4 | 337765                  | ATAGTGAAGGGGACATCTTGAACAGAGTGGGC<br>AACAAAAAGTTCACGTCCCTGTAGTTTCTCATGTT<br>CATAGAAATAGGATGTTTGATTGCTTGCTCT   | G         | C       | CATCATCTCCTTACTTGTGCTTCTGACGCT<br>TGATCTTTCCACTTGTGCTGAAGAGAGATTA<br>AATAACAGTTAAAAACACAAGCAAGAACTACT<br>T        |                            | NA                          |
| Ca-II-SNP590 | 21.48                  | Ca- <i>desi</i> -LG(Chr)4 | 365713                  | ATTTCTTCACTTCTCATCTTCGTTTTCTTTTTCTT<br>TCTGTGTTAATGTTAGTTTCTCTTTGGTTTTGCGA<br>TTTGTAATCAAATCAAACGGTCTCAGGG   | C         | A       | TAATAGAAGCAAAAAATGAAGAAATCGAGGAAG<br>GAACTAGGGCGAAGCATGATGAATGTCAAAGA<br>TCAAACCTCAAATTTGTAACGATAACAACATCTAA<br>T |                            | NA                          |
| Ca-II-SNP591 | 22.69                  | Ca- <i>desi</i> -LG(Chr)4 | 376968                  | GAGGCCTTATCAATAATCTCTATGAAAAGTGTGT<br>CCAGCAGCAAGTATCGTCGAGGTTTAAATCTTTG<br>GGCTAACATCAAATCTCAAACCTTATGTTTCG | C         | G       | TTTCCTTTATTGTTGATGTCATCCATAATGTAC<br>TCAAGTTTTGGTATCAATCTCACATTGTTATGCT<br>GGAAATTACTCTCGTCAAAGCCTTGACAAAT        |                            | NA                          |

| Marker IDs   | Genetic positions (cM) | Chromosomes      | Physical positions (bp) | Flanking sequences/Forward primers                                                                             | ICC 12968 | ICC4958 | Flanking sequences/Reverse primers                                                                                                                                                                                                                                                  | Annealing temperature (0C) | Amplified Product size (bp) |
|--------------|------------------------|------------------|-------------------------|----------------------------------------------------------------------------------------------------------------|-----------|---------|-------------------------------------------------------------------------------------------------------------------------------------------------------------------------------------------------------------------------------------------------------------------------------------|----------------------------|-----------------------------|
| Ca-II-SNP592 | 23.90                  | Ca-desi-LG(Chr)4 | 405477                  | GTTTCGAGTTGTGTAAGTTCGAAAAGAACTCCACACT<br>TTGATCCTTCTTTGTAACATTCATGAAGCTTAGATT<br>CTTTGAAAACCTCTGCTTTGGTACTTCC  | G         | A       | CAATAATTAAGTGTGCAGATTTCTGAACCTGTT<br>ACTACTCATAAAAGATCAGAGAAAAGGTGTGCA<br>ACTCATGTTTACATCAGTCATACATCCAGACT<br>T                                                                                                                                                                     |                            | NA                          |
| Ca-II-SNP593 | 25.11                  | Ca-desi-LG(Chr)4 | 440093                  | AGTCAATGCCAGCTTGTGTATGTATCCTTTTGGG<br>ACAAGCCGACTTTATATTTGTCTAAGCTGCCATT<br>AGCCCTATATTTAGTCTTGTATATCCATCT     | G         | A       | AGAAACGGCGAAAGGCTATGGCAGAAGAGTTG<br>ACAACCTTAGAAGTCAATCAAACCTTGGAGCATA<br>GTGCCTCTACCTAAAGGAAAAAGGTTATGGGA<br>TG                                                                                                                                                                    |                            | NA                          |
| Ca-II-SNP594 | 26.32                  | Ca-desi-LG(Chr)4 | 496502                  | TTAGATAGTCAATCGCGATGGTTACATCGCAATC<br>GAGGTGGAGTGTGGCGATAAGGGCATGGCCACG<br>ACGATGCAATGCAGCGCGGGAGGAGACAGGT     | C         | G       | CGCGAGCATAGACCATAGTTTTTCTTACATCT<br>CTCTCTTTTTCTCTCTCTCCCCCAAAAAGG<br>GTACTATCTTGTGATCATAAGGGGTTGCTTG<br>GTTAATCAAATGATTTGAAAAGGAGAGTCAA<br>ATCATAACCAAGTTCTTCAATCTATCTCATGTT<br>TTTTTATCTATTCAATCAGTTGAAGTGAAA<br>TTGAAGAGCTTATTCTCTTTGCAAGTTGAAGA<br>CACTCATACATTCGAAACATACATACAT |                            | NA                          |
| Ca-II-SNP595 | 27.53                  | Ca-desi-LG(Chr)4 | 520748                  | TGCTTGGCATGCGAGTCATGCTTGTATACTATGA<br>TGATTGTATATACATACTCAGTTGTTGTTGTTATC<br>GTGCCGTAATTGCTTTGAGGTGTGAATTTG    | A         | G       | ATTAACACCAAAATTAATCTCCGCAAATTCACAC<br>CTCAATCACACATCAAACATTCATAACATCAATT<br>ATGAACACATAATTACATCGAACTTAATCAAC                                                                                                                                                                        |                            | NA                          |
| Ca-II-SNP596 | 28.74                  | Ca-desi-LG(Chr)4 | 533777                  | ATTACTGGCCATCTTACTGAATTTAATATTTCTGTT<br>GAGGGTGTTTTTCGATGTTTAGTTTATTATAAAGT<br>TGTTATAATATATAGTATGGAGAAACTAT   | G         | A       | GAATGGATGAAATTAAGTTCCACAGTATTTCA<br>TTTGTCCAATCTCACTCCAATAATGAAAGATC<br>CTGTTACTGCCATAACAGGCATAACATACGATC<br>GAGATAGCATTGAACATTGGTTATTCACAAACA<br>AAAACACTACTTATTGTCTGTCAAAAACAAC<br>CTCTCCATTAGATTCTGATTTAACACCAAAACCA<br>TACACTTCGTCGTTTGATTCAATCTTGGTGCAC                        |                            | NA                          |
| Ca-II-SNP597 | 29.95                  | Ca-desi-LG(Chr)4 | 592505                  | AATAATGGTCCCTCAAATATTTACATTTAGAATTT<br>TGGTGTTTCTTTTAAAGTCAACTCATGCGTATCAT<br>TTGAGTTTTTGAATGATTTTTTACAATTA    | T         | A       | TGAATTTTTAAGCACAAAAGTTAAAACCTTCAT<br>ATTTAATTAATCCCTTATTAATAATTTCCAATTT<br>TTATAGGGAAGATTCTTAAATATGCTCTGAAT                                                                                                                                                                         |                            | NA                          |
| Ca-II-SNP598 | 31.16                  | Ca-desi-LG(Chr)4 | 646933                  | GAGCAAGGTCTTCAGGGTGTCTTGTGAGGAAGA<br>TCACCAACCCATTGGCTCTATCATCATCATCCCA<br>GGATTTCAATCAATGGCAATCCACACAGGTAC    | G         | T       | AGACAATAACCGAATTTTCATCATGAATTAACAT<br>GGTAGGCTCTGATACCACTTGTAACTATCCAT<br>GCCAATTACATGATGAATAACCAAGGCGGAA<br>G                                                                                                                                                                      |                            | NA                          |
| Ca-II-SNP599 | 34.79                  | Ca-desi-LG(Chr)4 | 678912                  | TAGTTTTTTTTAATCTTCGTTTTGTTCTTGTAAAGT<br>TTGCACCTTAACCTTACAACCTATCTAATATTAGACA<br>TTAATCGTTAATGATTATAAATTATGCAA | T         | C       | TCTTTTATAAATATTTGTTTTGATTATTTATCTT<br>TTTTAAGTTCATTTATTTTTATAAATAATTAAT<br>GTTAGTCTTTTATCATAACCAATTTCAAATT                                                                                                                                                                          |                            | NA                          |

| Marker IDs   | Genetic positions (cM) | Chromosomes      | Physical positions (bp) | Flanking sequences/Forward primers                                                                          | ICC 12968 | ICC4958 | Flanking sequences/Reverse primers                                                                                                                                                                                                                                                                                                                                                                                                                                                                                                                                                                                                                                                                                    | Annealing temperature (0C) | Amplified Product size (bp) |
|--------------|------------------------|------------------|-------------------------|-------------------------------------------------------------------------------------------------------------|-----------|---------|-----------------------------------------------------------------------------------------------------------------------------------------------------------------------------------------------------------------------------------------------------------------------------------------------------------------------------------------------------------------------------------------------------------------------------------------------------------------------------------------------------------------------------------------------------------------------------------------------------------------------------------------------------------------------------------------------------------------------|----------------------------|-----------------------------|
| Ca-II-SNP600 | 36.00                  | Ca-desi-LG(Chr)4 | 706953                  | GAGCAACCATCAAAGTTTGCTTAGCGGGAGC<br>CTTCCACCATGGTTTGTGCGCTATACAGGTCCCTT<br>TATAGTCTTAAATAGTCTTCTAGAGCTTG     | A         | G       | AGATAAATGCATCTTTGGCTGAGTGACGATAAA<br>ATACAGAGTGATCGGCTTCACTACGAATTATAT<br>TAAATCTTGTACTACTGTGCTGAATCTGCCAA<br>A                                                                                                                                                                                                                                                                                                                                                                                                                                                                                                                                                                                                       |                            | NA                          |
| Ca-II-SNP601 | 37.21                  | Ca-desi-LG(Chr)4 | 745785                  | TTAATCTTCTACAGTCTGGATCTCACCCATCATGA<br>TCCGGTTACTCACAACTTAAATCCCAAACTAAA<br>GGGCTAACCTTTTCCCCTTCTTGCCCTTC   | T         | C       | AACGGACTTGGTGTGCTGCTGGTGGCATGGC<br>ATCAGCTAAAGCTGCAGATATACAGGATGTGGA<br>CCAAACTGAAGGATCCTCAAAGGAGGTGGAA<br>AGA                                                                                                                                                                                                                                                                                                                                                                                                                                                                                                                                                                                                        |                            | NA                          |
| Ca-II-SNP602 | 38.42                  | Ca-desi-LG(Chr)4 | 754303                  | CTGCTGGAATTATGTACTCCTGCCTATCCAACG<br>CTTTTGCAGCATGTTATCCTGCATAACTGCAACCT<br>CTGAACCTTGTGTACTTTATAGGTTGCTGC  | T         | A       | TGACTTGACAATGAATTCATTACGGTAAATCA<br>CAATATCTCATCATGACGAAATGTCAAAGCAAC<br>TAAATTTAGAGAACAAAATTGGTTAAGTTTGATC<br>TAAATGCTGCTACAGTCTGTGTAGGAAATAAT<br>ATCCTAAATCGAACAACAAAGCATTTACAATGTGC<br>GACCAAAATGTATGTACATCTACCGCAACAACC<br>TCATGCATAAAATTTAATTGTAATCTTATCTTAA<br>TCTTCTACACTCTGCATCTCAGCCATCATCATC<br>CAAAGTCCCACATTC AATATGGCAATCTTGGT<br>TTCTTGCTCCTCATTTCTTCTACACTTCTGTCC<br>CTCTTTCTTGCACTTCAACCTTGCAAAATCTGAA<br>CCATTCTCGGCGTGAACATGGACAAGTCGC<br>CGACAATCTTCCACCACCGTCAGCCACCGCGA<br>AACTACTACAATCACTTCAATAGAAAAAGTCC<br>GATTATACGGAACCGATCCAGCCATAATCAAAG<br>CAGTACCAACAGCCCAATCCCAATGCTAATC<br>GATTAACCTACATGTTCTAATCTAGACAAAATTT<br>CCTAGGCTATGAACTTTGTAATCATGATGAA<br>AGCATGCATAACACCAAAAGAAGGAAAATGAA |                            | NA                          |
| Ca-II-SNP603 | 39.63                  | Ca-desi-LG(Chr)4 | 769894                  | TTATCATAATTTAAGCATCAATTTATGCTAGTTAT<br>TTGACTTTTGAAGGAAGGCACCTTGAATTTAGGAA<br>GAAATCCCCTGCCTACCCATCTTTATCC  | G         | C       | CAAAGTCCCACATTC AATATGGCAATCTTGGT<br>TTCTTGCTCCTCATTTCTTCTACACTTCTGTCC<br>CTCTTTCTTGCACTTCAACCTTGCAAAATCTGAA<br>CCATTCTCGGCGTGAACATGGACAAGTCGC<br>CGACAATCTTCCACCACCGTCAGCCACCGCGA<br>AACTACTACAATCACTTCAATAGAAAAAGTCC<br>GATTATACGGAACCGATCCAGCCATAATCAAAG<br>CAGTACCAACAGCCCAATCCCAATGCTAATC<br>GATTAACCTACATGTTCTAATCTAGACAAAATTT<br>CCTAGGCTATGAACTTTGTAATCATGATGAA<br>AGCATGCATAACACCAAAAGAAGGAAAATGAA                                                                                                                                                                                                                                                                                                           |                            | NA                          |
| Ca-II-SNP604 | 40.84                  | Ca-desi-LG(Chr)4 | 846652                  | AGCGGGGCCAAACTTAAATACCTCTAATTTGCGG<br>TTGGTTCGGTTGCTGTTGCGGATAATCATGTGTTG<br>TGTTAATACATGTTTTTTCGTATATTTCT  | T         | A       | GATTAACTACATGTTCTAATCTAGACAAAATTT<br>CCTAGGCTATGAACTTTGTAATCATGATGAA<br>AGCATGCATAACACCAAAAGAAGGAAAATGAA                                                                                                                                                                                                                                                                                                                                                                                                                                                                                                                                                                                                              |                            | NA                          |
| Ca-II-SNP605 | 42.05                  | Ca-desi-LG(Chr)4 | 909120                  | ATTGCAACCTCCAAGGAGTAGGACAAGTTGTTTT<br>TGAGGGGGGGGGGGTGTATTGCTAGGATACAT<br>ATTAAGAGAGTTAGTTTCTAGTAGTTAGTTGG  | C         | T       | GAACTCTACTCAATTC AACAATGTTTACAATC<br>TTCAATGATATCCAATCCAACACAAAACCTCCCT<br>ATTTATACACAATAATCTTAAACAAAGCACATA                                                                                                                                                                                                                                                                                                                                                                                                                                                                                                                                                                                                          |                            | NA                          |
| Ca-II-SNP606 | 43.26                  | Ca-desi-LG(Chr)4 | 937976                  | GACTTTGTAAAGATTGCTCTATCTCCAACAAGCC<br>ATCACTGCTTCCATTGCATGGACTCTGACATGTTG<br>TTGTAGTTGTTCTTTGAAGGAACACAGCAA | T         | C       | ATATGTATCTGCGAACAAGTTCACAGCATCCAA<br>ATTATTTAAATACGATTGAATTTGCAATTTTGATGT<br>TTGCGGTTTGTGCTGCAGTCGCACTATGTTTT                                                                                                                                                                                                                                                                                                                                                                                                                                                                                                                                                                                                         |                            | NA                          |
| Ca-II-SNP607 | 44.47                  | Ca-desi-LG(Chr)4 | 984185                  | GGAACAAGCTGAGTTAAGTCAGCTACAATCAACT<br>GCAGTTGCTTCACTACCTAATGTTGTTCCAGC<br>GATTCTCCGTGAAGTCTATTATGCCCATC     | A         | G       | ATTAGAGTGAGACAAGGAACCTGATATGCTCTT<br>AAAAATAACTTTTTAAAGACTGGAAAACAGAAAT<br>AATAAGTTCACTGCAAAGGATTAAAAAATGT                                                                                                                                                                                                                                                                                                                                                                                                                                                                                                                                                                                                            |                            | NA                          |



| Marker IDs   | Genetic positions (cM) | Chromosomes               | Physical positions (bp) | Flanking sequences/Forward primers                                                                           | ICC 12968 | ICC4958 | Flanking sequences/Reverse primers                                                                               | Annealing temperature (0C) | Amplified Product size (bp) |
|--------------|------------------------|---------------------------|-------------------------|--------------------------------------------------------------------------------------------------------------|-----------|---------|------------------------------------------------------------------------------------------------------------------|----------------------------|-----------------------------|
| Ca-II-SNP608 | 45.68                  | Ca- <i>desi</i> -LG(Chr)4 | 1018306                 | CTGCTGGAATTATGTATACTCCTGCCTATCCAACG<br>CTTTTGCAGCATGTTATCCTGCATAACTGCAACCT<br>CTGAACTTTGTGACTTTATAGGTTGCTGC  | T         | A       | TTCTCCAAGCTCAACAGGTACAAGAGGGATG<br>AGGGAGTGTAGAACATCTGCAATCAGGGGGCG<br>GTAAATGGCTCTGGTTGCACACATAACACAGC<br>CAC   |                            | NA                          |
| Ca-II-SNP609 | 46.89                  | Ca- <i>desi</i> -LG(Chr)4 | 1147249                 | CCAAGGCTTAACAGATTGTTCTTCATGTTGGCAC<br>ATACAACACATCACATATGAATGATTGTTGTCAT<br>CTCTCCTTTGAATCATCACITTTCTACTC    | C         | A       | TTCAAATCACACGACTGACCATAAATATTGGTT<br>TGTGAGCATTGATGAGAAGGTGAAAAGGGAGA<br>TCAGATTTGCAGATAATAGTTCAATAACTACAG<br>AA |                            | NA                          |
| Ca-II-SSR192 | 48.10                  | Ca- <i>desi</i> -LG(Chr)4 | 1213958                 | TGGTCGTGCTGCTGTTAAT                                                                                          | (TA)16    | (TA)14  | TTCAGCTGTTTTCTCCACG                                                                                              |                            | 59.35                       |
| Ca-II-SNP610 | 51.73                  | Ca- <i>desi</i> -LG(Chr)4 | 1346021                 | TTTTTTGTGATTTGTTGCTGAGCGCGACGTTT<br>TTATTTTTTATTTTTTGTATAGTCCGATGCTTT<br>TGGGTTTAGATTGACGAAGTAGTTTTAGT       | T         | C       | AAAGGCACTCCTCCAACTCTTAACATGTCCT<br>TGTAATACTTATGTCTCGGATTTGTAATGTTG<br>ATGACGTCGAAGTCATTGATTGAAATTTGTAAT         |                            | NA                          |
| Ca-II-SNP611 | 52.94                  | Ca- <i>desi</i> -LG(Chr)4 | 1749663                 | GATGATGTCGCTGAGCCTGCACAGATGGAGGAG<br>GATGTCCCTGAACCTACACAGATGGAGCAGACTG<br>AGGAGCAGTATGTTGAGCCTGCACATGATGATG | T         | C       | ATTGTGTCAACACAGATATACCACCGATCCTC<br>CGGGGAATCCGGGTTACTGATTGTGCTTAGGC<br>TCAACATCATCAGCAACATCATCTCAACAT<br>CA     |                            | NA                          |
| Ca-II-SNP612 | 54.15                  | Ca- <i>desi</i> -LG(Chr)4 | 1785296                 | GGATGAGGACGGGTTATAATTATCGTGAGCTTGG<br>GCATTTTGGATTGACTAGGGGATCCGGATGAGTG<br>TTGATGGTGACAGTAATGAACCTACTCAGCGT | A         | T       | ACTCCTTCAGCTACTCCATTACACTTCACTTCAT<br>CACCCCTCGTGTAAACCGTGTTCCTTACCATCAA<br>CTCCTCTTTTAAAGTTGTTTTCCCATCTTGCA     |                            | NA                          |
| Ca-II-SNP613 | 55.36                  | Ca- <i>desi</i> -LG(Chr)4 | 1850658                 | CGATTTTTATGTAGGAGTAATGGTTTTCAAACCT<br>CAACACCACTGATTTAACAATTTGTTCCACCACG<br>ATTTGACGAGTTTTGTAAGTGTGTAAT      | A         | G       | TCATTAATTTTTCATTTCTTTGAAATTTACATGAT<br>ATTTAATAAATAATTTAGAATGTAATGTATAA<br>TAGATTAATAAAAATAGTAGTTTTAAAAAAT       |                            | NA                          |
| Ca-II-SNP614 | 56.57                  | Ca- <i>desi</i> -LG(Chr)4 | 1895597                 | CTCCATTCAAACGAGTTTTAGATATGCCAAAATTT<br>ACAAATTTCTGGTCTTTATTGCTGAGTTGGCTA<br>GTAGGTGGGATGGACGTAGTGGGGGATTTA   | A         | G       | TTCTCATTTTCATATTCTTTCAAAGACTCACCT<br>ACTATTGGTAGTCCTATAGCTAAACATACGTCA<br>CTTGAGTAAAATTAACATCCTACCTCTAATC        |                            | NA                          |

| Marker IDs   | Genetic positions (cM) | Chromosomes      | Physical positions (bp) | Flanking sequences/Forward primers                                                                          | ICC 12968 | ICC4958 | Flanking sequences/Reverse primers                                                                                                                                                                                                 | Annealing temperature (0C) | Amplified Product size (bp) |
|--------------|------------------------|------------------|-------------------------|-------------------------------------------------------------------------------------------------------------|-----------|---------|------------------------------------------------------------------------------------------------------------------------------------------------------------------------------------------------------------------------------------|----------------------------|-----------------------------|
| Ca-II-SNP615 | 57.78                  | Ca-desi-LG(Chr)4 | 1931418                 | AATAAATACTTTAAGTTTGTATCTTACTTAGTTTAAA<br>TATTTGCTTTTGAAGAGAGTGGTTACTGGGGT<br>GTTTGGTGCTATTTTTCCCAATAGTATACT | C         | T       | CATGTAATTCGGTTAAATACATTATTCTCAAACA<br>CACAAAGATTTCATACACCAAGATGGCGTGACTG<br>CTTCAAATGCGTGGAGGCTGCAATTCTAAGAGA<br>TCTGTTGATCCCCTTCTCAAGAATCTTGCTTTC<br>TTACACAATGGCATCGGTAGCAGTCACCAAGAT<br>ATATCCAGAAAACAAGGAATATCTTTTGCCATT<br>CA |                            | NA                          |
| Ca-II-SNP616 | 58.99                  | Ca-desi-LG(Chr)4 | 1983063                 | TGCGGCGGTGGAGGCTTCGTCGGCAGACAATGT<br>GCCGTAGCGTTTGAAGAGACTGAGGGAGTGGAA<br>AATGTTTGGATCAAGCGGTTTATGACGGCATCC | C         | T       | CAATACTCCATAACCGTTCCACCACCATCAACG<br>GAGGCTCCACCCTGCAACCAACCTTACCGC<br>CTCCTTCAGTATATGGCTCCACACAGCGCA<br>CTC                                                                                                                       |                            | NA                          |
| Ca-II-SNP617 | 62.62                  | Ca-desi-LG(Chr)4 | 1995574                 | CCTGGGGCGGTTTTAATCAACCGCGTCGTCGTT<br>TAGGGCATAAACGTTTATTTTCCAGATTTTG<br>TAAGTTCATTCTCACTCTCTTTTCGTTTA       | G         | C       | TCTTCGATTTGTTTTCTTCAGAAGTTTTAGGG<br>TTGACAGATTTGGGGTTTTCAGAAATTTTAGG<br>GTTGTGAAAGGATGTGTACGGGATAACAAAG<br>CA                                                                                                                      |                            | NA                          |
| Ca-II-SNP618 | 63.83                  | Ca-desi-LG(Chr)4 | 2083734                 | AATCGCTCGTAGGAAAATTTACCACGGACAA<br>GCTGTGGGACACACTTACCTAGGGATTGTCGCTG<br>GGTAATATGACCCACTGAGTATCTGTGGGTAA   | T         | C       | AAATAGTAGACTTGTCAAGGATGATCCGTGGG<br>TAACGTAACCTACGACTTTTCCGTCGATAACTA<br>TCTACTATTTTATCTACGGCAAATCTATGGGCA<br>AC                                                                                                                   |                            | NA                          |
| Ca-II-SNP619 | 65.04                  | Ca-desi-LG(Chr)4 | 2111259                 | CACACATATCCCTCTCTTTCTGTGAAATTCTA<br>AGCTTTCGTTTCTCATCTTTATGAGATTTTTGAG<br>GGCTATATAGTGTACGTGGAAGGAAAAAC     | A         | G       | CATTTTTCTTTAAGACATCCAGACATCATATCA<br>ATATCTTACGAACCGCTAATTTAATATCTAGCCT<br>AACTCTGCATGAGGTAAGTCTTACCTTGAA                                                                                                                          |                            | NA                          |
| Ca-II-SNP620 | 66.25                  | Ca-desi-LG(Chr)4 | 2192586                 | ATTATTTGCATAAATATGAGAGACAAGTGCAG<br>ATGAGACTTCTACTTTTGGTGGAGTCCAAAGTTAG<br>TGAAGATGAGACTTCTACTTTTTGATGCAG   | G         | T       | AAACTCATAAATCTATTCCAATAAATCTCATTGA<br>TATTTTAACAAAGTGTCCAATTTAAGCTTCCATG<br>TTTCCCTCCTTTTGAATCTTCACCAACTTTAC                                                                                                                       |                            | NA                          |
| Ca-II-SNP621 | 67.46                  | Ca-desi-LG(Chr)4 | 2220409                 | TTTGGAACATGAGCAAAAGCTTTGAGTAAATCAA<br>TGCCATATGTGTGAGTAAATCCTTAGCAACCAAGC<br>GTGCCTTGTATCTTCAACGGTGTAAACAT  | A         | G       | GATGAGAGCTCTTGAGAAGCATCAAACCTTGG<br>GAAGCATGACGTTACCTACATGAAAGAATATTG<br>TTGGCTATAAATGGATATTACTATGAAATATAA<br>T                                                                                                                    |                            | NA                          |
| Ca-II-SNP622 | 68.67                  | Ca-desi-LG(Chr)4 | 2259951                 | GCTCAGCCACATGCGAAGCTCAATGGTTGTAT<br>ATTTGTTAGCTGATTTCCAGATCTCTCATTGAGTA<br>CCTGTGCAGATTTTTGTGATAAATAAATCAG  | T         | C       | ATGAATGACCCCAACTTGCATTTTGTGCGGAAC<br>AATTTGGCAATCCATCTCAATATGTTTGGTGGC<br>CTCGTGAATACCGGATTGGAAGCAATATACAT<br>G                                                                                                                    |                            | NA                          |

| Marker IDs   | Genetic positions (cM) | Chromosomes               | Physical positions (bp) | Flanking sequences/Forward primers                                                                          | ICC 12968 | ICC4958 | Flanking sequences/Reverse primers                                                                                                                                   | Annealing temperature (0C) | Amplified Product size (bp) |
|--------------|------------------------|---------------------------|-------------------------|-------------------------------------------------------------------------------------------------------------|-----------|---------|----------------------------------------------------------------------------------------------------------------------------------------------------------------------|----------------------------|-----------------------------|
| Ca-II-SNP623 | 69.88                  | Ca- <i>desi</i> -LG(Chr)4 | 2295325                 | AAACTTTTTGTTTTAGTTCCTATAAACGTTTTACT<br>TTGTTTTAGTCCTTCCCCACITTTTTGATTTGGACT<br>TTGTTTTGTTTTAGTTCGTGAAATATTT | A         | G       | GTTGGAATTGATCCTTGTAAATTCATTTTAGTC<br>CTTATGTAGCTCATATTGGAGGGACTAAAATCA<br>AATGTTCTACATGGGGATCAATCCACACAAA                                                            |                            | NA                          |
| Ca-II-SNP624 | 71.09                  | Ca- <i>desi</i> -LG(Chr)4 | 2301546                 | GATAATTTGTTTATTTGTTTTACTAATCTTTCATTTT<br>AAAAACAATTTTTTTTTTCAAATCTGGTGCCGA<br>CTTGTTGGGTGTGGTGGGCTCAATA     | T         | C       | CGTGTTATGAAAGAGTTCTAACGAACAAGAAA<br>GCCACCCGGTCCAATCCTTCCAACATTGGTG<br>GGCCCATATGGCCCGCATCAAGCAACCTGAA<br>CGT                                                        |                            | NA                          |
| Ca-II-SNP625 | 72.30                  | Ca- <i>desi</i> -LG(Chr)4 | 2432885                 | TTCTACGGTTATTGATCTTGACTCCCTTTTTTTC<br>GTCTTTTTAAAATTCAGCCTGATTACAGTGATTTAC<br>ATACTTTTGGATGTGTGTTTTGTTCCAC  | T         | C       | GTTGTCAAATGTTTGGATTTTGAAGATTTATG<br>TAAATTTATTTGAAGGGTGGTAACTGATAGATAG<br>AATTTATCTGTCATGCTGTGCTATTTTCTTTGA<br>GAGCAAGATAGAGATGAATGGTGTGTGAAAG<br>CACGTTGAAGTGCCAAGT |                            | NA                          |
| Ca-II-SNP626 | 73.51                  | Ca- <i>desi</i> -LG(Chr)4 | 2510477                 | CCCAGATCTATCCTCACTTCTCTTCAACATTTTT<br>GTTCACTTCTCTTTTTCTGATCTGTCTTACCTC<br>TTCAGCATTTAATTTATTCTCACTCCCC     | G         | A       | GAGATAGAAAAAAGATAAGCAATGGTGTATT<br>GATGGGGAAAATGGAGGGCTAGTTGCTTCTCG<br>AGATATAGAAATTAAGTCGAAAAAGAGATACGA<br>AG                                                       |                            | NA                          |
| Ca-II-SNP627 | 74.72                  | Ca- <i>desi</i> -LG(Chr)4 | 2618893                 | CAATCCGCTCCGTCGACCGTCTGGATGTCGCCG<br>TGATGATCGTTATCTCTTAAGGTAAGTCACTGAAT<br>CGACTAATTTCTAATATCTTTTCATTTTCT  | A         | G       | TGACTTCATTGATGATGACTCCATTGAGTAA<br>ATGGTTAGGGTTTTCAATACAAATGGGGCTTT<br>TTCAGTAAGACTCGATTTCCGTAATAAATGATT<br>T                                                        |                            | NA                          |
| Ca-II-SNP628 | 75.93                  | Ca- <i>desi</i> -LG(Chr)4 | 2673525                 | CTATTTACATAATGTAAGTAAATTTGTTTTTA<br>CCATTTTCTCATTTTTAGAGCAGTAAACAATATTT<br>CAGTAGGTAAGAGTTTTCCGGTAACCTC     | T         | C       | GATTTTTAAGTTTTTCGGAATTCATTCTGTAC<br>CGGAGAACTTAAGAAAAGTTTTTCGGAAGTATG<br>CTGTGTACCGGAAATCTTGTTTTTGAGTTTTCC                                                           |                            | NA                          |
| Ca-II-SNP629 | 77.14                  | Ca- <i>desi</i> -LG(Chr)4 | 2761588                 | TAATAGGTATTTTTCTGTTTTAATGTTAAATTTG<br>AAATACCCACTACCTGCACTAGTCCCATTTGGCCT<br>AGTTTCAGGTTGCAGCTGGTGGTGAAGT   | T         | C       | CCAAGTTGACATCTAAGGGAGAATTAATAAAG<br>TGGTAGATTGTAGCATTTTGTTTTTCTTGGGA<br>TTAAATATTTGTCATTTGTCTGTACCATGAC                                                              |                            | NA                          |
| Ca-II-SNP630 | 78.35                  | Ca- <i>desi</i> -LG(Chr)4 | 2774441                 | TTTCCAGAACTGCTTCAAGATCAATCTTGGTTTT<br>CAGAACTGCTTTCTTGTGATGATTTGTGATGTTT<br>GATACCTATCTGTTTTAACATACTCAAAA   | G         | A       | TGTTGAGACAAAATCTCAATTTAATGTTTTGATG<br>AAAACAACAAAAGTTAATTAAGAATTCATTA<br>ATGATTTCAAGTGTGTTTTGATTTAACATGTTG                                                           |                            | NA                          |

| Marker IDs   | Genetic positions (cM) | Chromosomes               | Physical positions (bp) | Flanking sequences/Forward primers                                                                         | ICC 12968 | ICC4958 | Flanking sequences/Reverse primers                                                                                                                                | Annealing temperature (0C) | Amplified Product size (bp) |
|--------------|------------------------|---------------------------|-------------------------|------------------------------------------------------------------------------------------------------------|-----------|---------|-------------------------------------------------------------------------------------------------------------------------------------------------------------------|----------------------------|-----------------------------|
| Ca-II-SNP631 | 79.56                  | Ca- <i>desi</i> -LG(Chr)4 | 2792460                 | TAGTGGAATCTAATGGTTGTGAGGACTGGACTA<br>GCCCAAATTGGGTGAACCAAGTATACCTTTTTGTG<br>TCATTTTCTATCCTTATCTTTAATTATTG  | T         | C       | CGATTATGGAAGTGTTCATGGTTGAAGAAGGT<br>GGAAGAGGTTGACAAAATATGGAACAATAGAG<br>CAGCAAACGAGAGAGAAAAGCAGAAAGGTAA<br>GACTAAGAAGAACAAGAACGTCACTCTCCTAGT<br>GCATATCTTTGTTTCTT |                            | NA                          |
| Ca-II-SSR193 | 80.77                  | Ca- <i>desi</i> -LG(Chr)4 | 2828033                 | CGATTCTTTTGTCCATTTCCA                                                                                      | (AATA)6   | (AATA)8 | CCCATTTTGTGCAGATGTTG                                                                                                                                              |                            | 59.92                       |
| Ca-II-SNP632 | 83.19                  | Ca- <i>desi</i> -LG(Chr)4 | 2851816                 | ACGGATTTCCGGTCCATTTTGTGAGTTGTACAAA<br>AATCGCTCGAAAAGCCAGATGATAGCATTCTTCT<br>CCAAAATTTATAACTCTGTTTCGGGTTTCG | T         | C       | TTTCATCTGGGCTTTTCGGTTCGATTTTCAGACC<br>ACCAAGACTAATATGATCCGAAATTCGTATTTTC<br>CGAAAAGACAATTGTTAATGTTTAAATCTAGT                                                      |                            | NA                          |
| Ca-II-SNP633 | 84.40                  | Ca- <i>desi</i> -LG(Chr)4 | 2879232                 | TTGTGTTATTTGCACCATTTGCCCTTGAGAGCCA<br>ACTTGTCCTTGAACGGGAAATCTATGAAGGGAAT<br>GTTCAACTCCTGACAGATGACCGTCTGAAT | A         | C       | TCTCTCTCTCTCTTTAATCTAGTCTTTAACA<br>TAGTTATTTTCTATTAAGGCATGGGATGGGAG<br>GTGGCAAGCTATTGTTGATGATAAGGATCTGAA                                                          |                            | NA                          |
| Ca-II-SNP634 | 88.03                  | Ca- <i>desi</i> -LG(Chr)4 | 2919277                 | GTGGTGCCAGATTCACAGGTAGAACGGCAGGTA<br>ATGTTTTCGTTTGTGCGGATTTACATGTGACTAT<br>ATATCCGAGCAAACATTCACAATTTCTCTGA | T         | G       | ACTATTTTATTGGTATGACAATTCGCAAGAAAAT<br>CCGAGGAAATACCTGCGGAATTCGCTGTGA<br>ATATTTACAGCGGGAAACATTCGAGATAAAAT<br>C                                                     |                            | NA                          |
| Ca-II-SSR194 | 90.45                  | Ca- <i>desi</i> -LG(Chr)4 | 2986218                 | AAAACACGAATGCTCGCAC                                                                                        | (CA)8     | (CA)9   | TTCTGAATTGCATGTGAATGG                                                                                                                                             |                            | 59.86                       |
| Ca-II-SSR195 | 92.87                  | Ca- <i>desi</i> -LG(Chr)4 | 2993847                 | TCACTGACTAAGTGCATGTCCA                                                                                     | (TAA)5    | (TAA)6  | TATTTCAACCTTGAAGGGGC                                                                                                                                              |                            | 59.37                       |
| Ca-II-SNP635 | 95.29                  | Ca- <i>desi</i> -LG(Chr)4 | 3050876                 | GAATCATAATTAACCTTTCTTAATTAACATTTGTTA<br>TTTTCTCAAACCTTACATATGGAGTTTGTCTCAA<br>CACTCTCCCTTTTGTGATGATGACAAA  | T         | C       | TTTAAATCTGTCAATTTAAAACTGCATAAAT<br>GAGGGGAACTTTAAGCTCTTTAATACTTGA<br>TATTAGAATCAGAATTAATCTAAATTAATAT                                                              |                            | NA                          |

| Marker IDs   | Genetic positions (cM) | Chromosomes               | Physical positions (bp) | Flanking sequences/Forward primers                                                                            | ICC 12968 | ICC4958 | Flanking sequences/Reverse primers                                                                             | Annealing temperature (0C) | Amplified Product size (bp) |
|--------------|------------------------|---------------------------|-------------------------|---------------------------------------------------------------------------------------------------------------|-----------|---------|----------------------------------------------------------------------------------------------------------------|----------------------------|-----------------------------|
| Ca-II-SNP636 | 100.13                 | Ca- <i>desi</i> -LG(Chr)4 | 3089120                 | AATGGTTTAGGAGGTTTGTGATGAGGGTGTTCGGA<br>GCACAGAGGTCCTAGTGATGACACACTGTGAATA<br>CCATGTCTCAGATAGGCAGTGGGCTCCTTCAT | T         | C       | TTCAAAGGATCTAAAGGCATGACAAATTCAG<br>TATGGTACTGAAAGGGTTCATATGGAATTA<br>TCCACCACCTTTATGTCAAATACTTGATACGT          |                            | NA                          |
| Ca-II-SNP637 | 103.76                 | Ca- <i>desi</i> -LG(Chr)4 | 3142206                 | ATATTAATGACATACCTATTAGTCGTAGTATTCCT<br>AGATGCAATACTCGATTGGTCCATGCTTCAACAAA<br>TTTTTCCTTATGAGGATTCAACCATGTGT   | T         | C       | GAAAATTGTTTATTGTTCTGAAGAGAAGGAGTA<br>CGAGGAACCTTTTGCATATATTTGAGCAAGCATG<br>TGTCGATAATATTTTCTTTGACTACGTCAGA     |                            | NA                          |
| Ca-II-SNP638 | 104.97                 | Ca- <i>desi</i> -LG(Chr)4 | 3202194                 | AACCAACCTCCGGCCTTGATGCTAGAGCAGCTGC<br>AATTGTAATGAGAACAGTAAGGAACACCGTGGAC<br>ACCGGACGTACCGTGGTGTGCACGATCCATCA  | G         | A       | ATATTGAAGCAATAAATCTTTAATATGTAGTAC<br>TTAAACAAAATGATGAGACTGAGAGTTCCTTAC<br>CTCATCAAAGGCGTCAAATATGTCAATACTTGG    |                            | NA                          |
| Ca-II-SNP639 | 106.18                 | Ca- <i>desi</i> -LG(Chr)4 | 3220236                 | TGCTTTCTCCTCTCCAGACCTCTTTCTCCGATC<br>CGACCGTTGAATACGAAGACCTAAATGTTGGAAA<br>CCTGCTGTCCAAAAATCAGCTCGATCCAACG    | G         | A       | TAGGAAAGACAACCACAAAAGAGAAAAGATCA<br>GAAGAGTAACCCTATTCCCAATTTGTTAAACC<br>AGTCTCAGAAAAACATCGATTACGCATTGTTA<br>A  |                            | NA                          |
| Ca-II-SNP640 | 107.39                 | Ca- <i>desi</i> -LG(Chr)4 | 3270115                 | GTGGTTGATTGTACCTTCAAACATATGTGAGTT<br>TCAATAGTCCATTGACTCTACTCAATATTTCTTCTA<br>ATGATAACTTATGGGCATATCATCTATTT    | C         | T       | TATTGCATTGAACATACAAATGAGTTTACCTTGA<br>AATACAGAGGAAAAAGTTTGTGGTTTGATCGTA<br>GGTTCTTACCAGAAAAATCATGAGTTTAGAAATA  |                            | NA                          |
| Ca-II-SNP641 | 111.02                 | Ca- <i>desi</i> -LG(Chr)4 | 3301962                 | TACCATCCTTATGTTTTACATCTTTGCAACTCAAT<br>GGGAAGGGAAGGAAACAACCTTTTTGTGTATACG<br>TGATAGTGATGGTCAAGAACATTTTTGTAT   | A         | G       | AAAAATGATAAAATTTGTTAAATACAAGAGTC<br>ATAGAGTGGTGATATTGTGTGACTACTGATCAC<br>AACTTTTTATAGAAATAGTTGCTTGTTCATAAT     |                            | NA                          |
| Ca-II-SNP642 | 112.23                 | Ca- <i>desi</i> -LG(Chr)4 | 3363537                 | ATCTCATTATTTCAAGCAAGGTTCTTTTCATCCTTT<br>CAGCCATTCCATTTTCTGAGGTGTGTTTTTAAA<br>ATCCTATGTCTATTCACACCATGAGTTTT    | G         | T       | GATTGGACGTCTATAGTTGAGAATAAGACTGAA<br>AAAGGATTAACCTTTAAGAACAGACAATGGTC<br>TTGAATTTTGCAGTGAAGAGTTCAGTATTATT<br>C |                            | NA                          |
| Ca-II-SNP643 | 113.44                 | Ca- <i>desi</i> -LG(Chr)4 | 3390135                 | TACTATTCCTAACAGAATCATATTGGTTCTGGTTA<br>GGTATTGTTTCATTGATTCAACTCAGCTTAGTCATA<br>AATACCAGTGGTCTATCAAATAGGGATAG  | A         | C       | AGGTAGCCTTGTGATAAAATTTATCATTAGAG<br>AAGAGTGAAGAATCTAAAGAATATAATCAAAA<br>CATGATTAACGTATTATTGATTGTCATCATAGT      |                            | NA                          |

| Marker IDs   | Genetic positions (cM) | Chromosomes      | Physical positions (bp) | Flanking sequences/Forward primers                                                                             | ICC 12968 | ICC4958 | Flanking sequences/Reverse primers                                                                                                                                                                                                                                           | Annealing temperature (0C) | Amplified Product size (bp) |
|--------------|------------------------|------------------|-------------------------|----------------------------------------------------------------------------------------------------------------|-----------|---------|------------------------------------------------------------------------------------------------------------------------------------------------------------------------------------------------------------------------------------------------------------------------------|----------------------------|-----------------------------|
| Ca-II-SNP644 | 114.65                 | Ca-desi-LG(Chr)4 | 3450900                 | TGTGATGGTTCATAGTGTGGTGTGATGGTTCATAGTGT<br>TTGTGATGGAGAATAAAGTCGAGTTGATAAAGGTA<br>TGTTTGAGGCCGATGGTGGTCAATGTTTG | C         | T       | CGACGACAAAGATGTTGAGTTGATGTTTGTGATGT<br>GTATGCACAATGGTCACAACCTCGGCACCATCTA<br>GTTATATGTTACCTTTGAGTATGGTCCTCCATC<br>A                                                                                                                                                          |                            | NA                          |
| Ca-II-SNP645 | 115.86                 | Ca-desi-LG(Chr)4 | 3480006                 | CGATTTTATGTAGGAGTAATGGTTTTTCAAACCTT<br>CAACACCACTGATTTAACAAATTTGTTCCACCACG<br>ATTTGACGAGTTTTTGTAAAAGTGTGTAAT   | G         | A       | AAACGCAACGCAATGATGTACAAAATCATCCA<br>TGGCTGCTAAAGTTCATAAAAAACACAGCTCTT<br>TCTCAACAGATGATCAGGTGTGCGTTTACTCAT<br>TTCATAGACTCAGTGCGAATGGCAGAAAAAAC<br>TCTCTATGATGCATCAGTGAAGATGCCAGATCC<br>AAAGAGTTCTCCACCAGATTCTAACTCTAAAGA<br>ATTTTCAAATGGTCAATGGATTTCTCTAGCTC<br>CTGCTCAATCAT |                            | NA                          |
| Ca-II-SNP646 | 117.07                 | Ca-desi-LG(Chr)4 | 3510460                 | CACCCGCAGCCCGGATTAACCGAGCAGCCCGTA<br>GCCCAATTTCTATAACGGGCGGGTCAAAGCGGG<br>TACACGGGTCTACGGATAAATAACATGGATT      | C         | T       | TATAGTTAGATGATTTTTTTTCCATATAATTTGA<br>ATCGGGCGGGTGCAGATATCCGCAGTCCAAAA<br>ATCTTTAACCGAACCCGCCGTTATAAACCATG<br>T                                                                                                                                                              |                            | NA                          |
| Ca-II-SNP647 | 118.28                 | Ca-desi-LG(Chr)4 | 3524948                 | ACAAAGGCAGACGTTTGTGACGGCTTTTGCCTC<br>ACAAAAGGCAACGTACTTTTCAAACCTTTGTGGCCG<br>CCACAAATGTTTGTGACCACCGTATTTGTGG   | C         | T       | GAGTCTTCACAACAAAAACAAGGATTTTGTG<br>AGGGCCAAAAGCCCTCACAAAGGGGAAGAAGC<br>AGCCACAAAGGGGAATTTGTGGCGCCTTAG<br>ACA                                                                                                                                                                 |                            | NA                          |
| Ca-II-SNP648 | 119.49                 | Ca-desi-LG(Chr)4 | 3612793                 | ACGACATGTGTGCGTGTCCACCGACTTGTATC<br>AGACATCAAACAGTTTTCAACTAGGTGTTACAT<br>AGGTTAGGACTTCCACTAATAGACTAGTCAT       | T         | G       | CTCATTCACCTGAATCCTAGAAGATTTCTTCAC<br>ACAAAAATACTATTTTCATGTTACTTAACTTGTA<br>AGGAGCATAAGCCCAAAAAAAGTGTCTACCCA                                                                                                                                                                  |                            | NA                          |
| Ca-II-SNP649 | 120.70                 | Ca-desi-LG(Chr)4 | 3645705                 | GTTTATGTCCAAACTCGATATGGTCATTAGGAATT<br>AGTCAAGTTGATTTTCAAGTACTCGAAGAGGTACA<br>ATAGATCTTGGTATCATATTTGATTGCGGT   | T         | C       | TCATCTTGCAAGAGTAATACATATCTTGTGTA<br>GATTTCTTATCATTATGTCACCAACATAGTATA<br>ATCAACATATCATATAATTGAACGATCACCTT                                                                                                                                                                    |                            | NA                          |
| Ca-II-SNP650 | 121.91                 | Ca-desi-LG(Chr)4 | 3666024                 | TTGCTTCATATATTTGAATGAAAAGTGTGACTTTAT<br>CTTTATTTTCGCTCTTTTCGACACACTCAAATGAAT<br>CTTGGCACAACTTATACTTTGTCATATT   | G         | A       | TTAGTTTTTGTGTTGGAACACACAATCATGATG<br>GAGTGGATACTTTAGACGGTCAATTCATATTTGG<br>GGCATTAAATTAATGATTGAAAATTTGTTAA                                                                                                                                                                   |                            | NA                          |
| Ca-II-SNP651 | 123.12                 | Ca-desi-LG(Chr)4 | 3702341                 | AATTGAGTCATTGGCCAATACTATTTTATATGTTA<br>TTATCTTTTATCCATCTTTGTTTGTGAAATGAAA<br>GACTTGAAGTCTATATCTGATAAATAAT      | C         | A       | TTTATAAATATTTATCTAATCTTTTTTGTGTTT<br>TCTAGTGTCTAACAGCCATTAATATATATTT<br>ATACATAATGAATCAATCTTCTTAACGATA                                                                                                                                                                       |                            | NA                          |

| Marker IDs   | Genetic positions (cM) | Chromosomes               | Physical positions (bp) | Flanking sequences/Forward primers                                                                          | ICC 12968 | ICC4958 | Flanking sequences/Reverse primers                                                                              | Annealing temperature (0C) | Amplified Product size (bp) |
|--------------|------------------------|---------------------------|-------------------------|-------------------------------------------------------------------------------------------------------------|-----------|---------|-----------------------------------------------------------------------------------------------------------------|----------------------------|-----------------------------|
| Ca-II-SSR196 | 124.33                 | Ca- <i>desi</i> -LG(Chr)4 | 3728850                 | AATTTAACGGTTGTGATTAAGTAT                                                                                    | (AT)6     | (AT)7   | CCGACACAACGTTATTGAATG                                                                                           |                            | 57.34                       |
| Ca-II-SNP652 | 125.54                 | Ca- <i>desi</i> -LG(Chr)4 | 3735411                 | TTTAGTTTGACCGAATTTGGTTCAAACCGGTCTGA<br>TATGATTTAGTCAAATTTGGTTCGAATCATCTAGT<br>CCAATTTGGTTTATTAGTTCTGATTCAT  | A         | C       | CTTCTCGTGTTCACCTTCAAACCAATCACAC<br>TAAATCAGACCAAATCAAATCAAATGAATCATA<br>TCATACCATGCCAAATCAAATCAGGTTGGGTCA       |                            | NA                          |
| Ca-II-SNP653 | 129.17                 | Ca- <i>desi</i> -LG(Chr)4 | 3789814                 | GAGCTGCCTGAAACCAGTTCATCACAACTATTGTG<br>AGGGCCAAGCCAAAAGTGTATCCTAAAAATGCACT<br>CTTGAAATATTGGGCTGTTTTCTCTAGA  | A         | T       | CTTACATTTAATAATTTGGTTGGCACTCACTTGT<br>ATTTATTTTATGATGGTAAGTGTTCCTTCAGGT<br>ATCTTTGTAGCATTGGCCTTGCCTTTTGTATGT    |                            | NA                          |
| Ca-II-SNP654 | 134.01                 | Ca- <i>desi</i> -LG(Chr)4 | 3863231                 | TTCTACGGTTATTGATCTTGACTCCCTTTTTTTC<br>GTCTTTTTAAAATTCAGCCTGATTACAGTGATTTAC<br>ATACTTTGGATGTGTGTTTTGTTTAC    | C         | G       | GAAACATCATAACACACAAAACCTTATGAGAG<br>TGACTATATCCCATAAATGCGCATTGAGCAGAC<br>TGCGCTCTAAGCTTATGTCTTTCAAATGGAGGT<br>A |                            | NA                          |
| Ca-II-SNP655 | 135.22                 | Ca- <i>desi</i> -LG(Chr)4 | 3932848                 | ATTACTGGCCATCTTACTGAATTTAATTTTCTGTT<br>GAGGGTGTTCGATGTTTATTATAAAGT<br>TGTTATAATATAGTATGGAGAACTAT            | A         | G       | CGTATATAAAGAACATTAAGAGTTTCTTGG<br>TGCATAAAGACATTAATGTTTGGGGTATTACT<br>TTACCCTCACAATACATAAAACACTTGAAAAA          |                            | NA                          |
| Ca-II-SNP656 | 136.43                 | Ca- <i>desi</i> -LG(Chr)4 | 3954869                 | ACATGTATCTACCAGCTGCTACTGCAGCTAATGG<br>GATCAAATTCCTCTTCTCAATCAAGGCTGGAG<br>CAAACGCAGGAAATATGGCTCATATTGGAAT   | T         | C       | ACTGAGACACAGCAAGATCTTCATTTCCCGTGG<br>AGCTTCCAGTATTCAGTGTGCGACTAGGAGCG<br>TATCCACAGGTGGAGTGATAAATGATCCAGAA<br>GG |                            | NA                          |
| Ca-II-SNP657 | 137.64                 | Ca- <i>desi</i> -LG(Chr)4 | 3975881                 | TATCTTCTATTTCCATTTACGATTTTCAAGTCTTGT<br>TGTGTAGATTTTCAAGTTTTATTGTTATGTGAAAT<br>GTGTTTTCTGTTGCACTTTGGAGATTGT | T         | A       | GCAGCAACCATATAAATTAACACTTACATAATAA<br>TCTCCAAATAAGCCACTGTCACATACACAAATT<br>AGAGGTGTATAAATTAATAACTACTTGACAT      |                            | NA                          |
| Ca-II-SNP658 | 138.85                 | Ca- <i>desi</i> -LG(Chr)4 | 3989112                 | CATGAGACACCTCCTTGATCTTCTTTTTCTTCT<br>CCTCCTTTCTTTCTTCTACTTCTCAACTT<br>TACCCTCCTTCTTCTTCTTCTCTC              | A         | G       | GTCTTAAGGATTTGATCAAGAAGCATTCTGAAT<br>TCATCAGTTATCCAATTTCTTTGGATTGAGAA<br>AACCATTGAGAAGGAGATTTCTGATGATGAGGA      |                            | NA                          |

| Marker IDs   | Genetic positions (cM) | Chromosomes               | Physical positions (bp) | Flanking sequences/Forward primers                                                                            | ICC 12968 | ICC4958 | Flanking sequences/Reverse primers                                                                                                                                                                     | Annealing temperature (0C) | Amplified Product size (bp) |
|--------------|------------------------|---------------------------|-------------------------|---------------------------------------------------------------------------------------------------------------|-----------|---------|--------------------------------------------------------------------------------------------------------------------------------------------------------------------------------------------------------|----------------------------|-----------------------------|
| Ca-II-SSR197 | 140.06                 | Ca- <i>desi</i> -LG(Chr)4 | 3990820                 | GGGTTTCAACTTTTCTAGATCCTTC                                                                                     | (AAT)5    | (AAT)8  | CTCCCGAGGTAAGTGGACAG                                                                                                                                                                                   |                            | 59.91                       |
| Ca-II-SNP659 | 142.48                 | Ca- <i>desi</i> -LG(Chr)4 | 4003197                 | GTCTCTAAAATGTTTGAGATGACTCTGTCTTCCAC<br>CGAACCGAACTATGACCGGAATACTACTTACTTAT<br>TAGGAAGTTCGGAGGTGTAGGGTAACAACG  | G         | A       | GGTAAATGTTGGATAAGAAAAGTACTCATATAC<br>TTATTGTTTTAAGATTTTGGGTTGAAATGTTTTA<br>CCAAAATCTTTGTGGATTATAGAACATTTGAT                                                                                            |                            | NA                          |
| Ca-II-SNP660 | 143.69                 | Ca- <i>desi</i> -LG(Chr)4 | 4020449                 | TTTGTTCCTTCTAAACTCTTGATATCTGAACTAG<br>CGTGATATTTAACTAATTTGAGTTGAAATTGATAG<br>GCATTCTTAAGAGGGGAAAATCCTTCCA     | T         | A       | AACTCCTTTTCTATGATGAACAAAGTATAGCAAT<br>AAATGAAACCTATTGAATTTAATATAAATTTGTGA<br>GAAAACAAATGAAATAAAATATATAAAAATG                                                                                           |                            | NA                          |
| Ca-II-SNP661 | 144.90                 | Ca- <i>desi</i> -LG(Chr)4 | 4027639                 | ATTAGCTTTTGTGATTGATCACACACGCACAATAT<br>TTGACATGTAGTTTATGTGTTTACTTATTGAAGCG<br>TTGGTAGTGTCTCTGTTTGTAGCCACACGAA | T         | C       | GCAACAAATGCCACCCAAGAACAATATATGCC<br>GATACTCAACCATTGGTTAGATCTGCTTTAGAT<br>GGATAAATGCATGCATCTTTGCATATGGACAG<br>ACTGGCTCAGGGAAGACCTACACCATGAGTGG<br>ACCGGATCTGATGACTGAAGAGACATGGGGTG<br>TCAACTACAGGGCTTTG |                            | NA                          |
| Ca-II-SNP662 | 146.11                 | Ca- <i>desi</i> -LG(Chr)4 | 4030857                 | TTGAAATTAATCTATGCATATACATAATTAATCTAT<br>AATTCATACCTGCTTCTCTGCTTTCCTGTGAGCC<br>AATTCATGATCGTTGATTTCCCTCTGTTAC  | G         | A       | ATACTAGTATGCCTCAGGAGAGTAGCTTACCAA<br>ACTCAATTTTACATCTCCATCGAAGAGAATATT<br>GAACTTGAAGGCTTCAGTTTTAATAACAGTGA                                                                                             |                            | NA                          |
| Ca-II-SNP663 | 150.51                 | Ca- <i>desi</i> -LG(Chr)4 | 4085353                 | GATGTGGAGGAATTTGATGGAACCTCATCTTGTT<br>CATTGGGGCTGGATCAGATCCTTATGAAGTTATAA<br>CAAATGCTGTCAAGTGAGTTTACAATACC    | T         | A       | TCACTTCAAAGATTAAAACATGAAGCCTAATC<br>ATAGTAATTGAAAAAAGTCAAACTAACTTTTTA<br>AGCAAGAACAAAGAAGATTGAAAAGGTAAGGC                                                                                              |                            | NA                          |
| Ca-II-SNP664 | 151.50                 | Ca- <i>desi</i> -LG(Chr)4 | 4101088                 | CCAACAGTGGTTTTGTGAATAATTTCTACCAAATG<br>AAACTGCCTCTATTGCCAGCTTTTCAGCTGAACGT<br>GTTAAGGATATGTTTAGAACAACCTTATGT  | A         | G       | CTGGAATATATAGTCAATGGCCAAAATCCAA<br>AAGCTCCTAGCACTCCTAGAATTTGATTGAAGT<br>AAGGAAACATGATTGCAATTCAGTTGTGAAA<br>T                                                                                           |                            | NA                          |
| Ca-II-SNP665 | 153.48                 | Ca- <i>desi</i> -LG(Chr)4 | 4131111                 | ATATAATTTAAAAGAGTTATGTTGCATACCACCGTT<br>AGTCGTCGAGTTCTATCTGCCACCATCGAGAAACT<br>TATCGAAGCTTCCCGTCCATGGAGGTTG   | C         | T       | GGTTAAATCAGATTTATTGTAATTTGAGAATGA<br>AAAGAAATGGATCTAATAATTAATAACAGAGA<br>GGATGGTTGGTCGACCCGACGGCGGAGCTC<br>TG                                                                                          |                            | NA                          |



| Marker IDs   | Genetic positions (cM) | Chromosomes               | Physical positions (bp) | Flanking sequences/Forward primers                                                                            | ICC 12968 | ICC4958 | Flanking sequences/Reverse primers                                                                               | Annealing temperature (0C) | Amplified Product size (bp) |
|--------------|------------------------|---------------------------|-------------------------|---------------------------------------------------------------------------------------------------------------|-----------|---------|------------------------------------------------------------------------------------------------------------------|----------------------------|-----------------------------|
| Ca-II-SNP666 | 154.47                 | Ca- <i>desi</i> -LG(Chr)4 | 4176869                 | CACAAGAACCTGATTCAATATCTACATGCTTATGT<br>AGACCTGATCGGGGAGATTCATTCTGGAAC<br>CGAACCGGAGGGGCTGATCATTCTTCTGTTG      | G         | C       | TTCTGACCACAATATAAAGGTTTGGACATCTTC<br>TCATTGTGATCATAATAGATTTCCAACAAATAGA<br>CAACGAGAAGAAGTCATTACCCAATCATGGCAA     |                            | NA                          |
| Ca-II-SNP667 | 155.46                 | Ca- <i>desi</i> -LG(Chr)4 | 4207427                 | GAGTAAAGAGATGTCTCATCTAGTTATTCCGTTTA<br>AAAATATTTTTATTATTTTTGATTTTTATTGAGT<br>TTTAAAGCCACCAAGTGGTACAACCTGT     | A         | G       | CTCTCTATGTGATTTTGTTTAATTTAAAAA<br>CATTTACAATAAATAATATTAGATTAATAAGAT<br>GTGACATCTTTTTAATCTTTGAGTTGTAAAA           |                            | NA                          |
| Ca-II-SNP668 | 156.45                 | Ca- <i>desi</i> -LG(Chr)4 | 4299087                 | GGGTACCGTCATTTTCTCCATTTTGGAAATCAAG<br>AGGTGGGTTTCCCTTTTTCTATCTTTCATTTCATGC<br>ATGTAGGAAATAATGTGTTCCATAGGTTAG  | A         | G       | ATTTACTCAATCTACACTAATCTATTTCAAAT<br>CCCTAAATCCAACCAAGACTAAAATAAAAATCAT<br>TTTCTTCATTTCAAACCTTAAACCCCAAATC        |                            | NA                          |
| Ca-II-SNP669 | 157.44                 | Ca- <i>desi</i> -LG(Chr)4 | 4379030                 | TTTAAAGATTACATTCTATCAAGGTTAGATAGGTGC<br>TGGTATTGCTTTCTGGGTGGAAAGCAATAGAGGT<br>TGAAATAGATCAAGGTTGACCTAGACTAGGT | A         | G       | AGAGTTTATCATGGTTCACCCAACGTGGGTTAC<br>ATCTAGTCCTCACACAGTGAGATTTTCCACTAA<br>GTGTTTAAAACAAAGGCTTCTTGATCTTACA<br>A   |                            | NA                          |
| Ca-II-SNP670 | 158.43                 | Ca- <i>desi</i> -LG(Chr)4 | 4414547                 | TTTCTTTTTGTTTATGTATGATGATGCATTACATG<br>GAAATTTGAAAAGATTAATAACTAATTCACATTTAAC<br>ATTTCTTGAGAAAGTTGTCAGTGGGTTG  | A         | G       | CATTCAAATAATATTTGACTGTATTTGAAAACAT<br>AAAATAATGTTGATTTTGTGTTTGGAAATCTGCAA<br>ATATGATCAATTGGTCCACACAATGACTTCTT    |                            | NA                          |
| Ca-II-SNP671 | 161.40                 | Ca- <i>desi</i> -LG(Chr)4 | 4442373                 | TTTCTCTTTCTCCTCTCTCTTTTCCAGCCTTCTCTC<br>CCTCTCCCTCTCCCTCTTCTGCTTGCAAGTTACAGCC<br>TTCTTTCTCCTTCTCCAGAATCAAAT   | T         | C       | ACGACGAACGGCCACAGAGGCGGTGCGAGGC<br>CCGCAGCGAGCAGAGGAGCGATCTGGACTGG<br>AGGCAGAGTGAGGCGGTGCGACGTTTTTCATG<br>ATCCGT |                            | NA                          |
| Ca-II-SNP672 | 162.39                 | Ca- <i>desi</i> -LG(Chr)4 | 4466488                 | TTATTTATTCTGTTTTGTGCTTATATTTCAACTTAA<br>GTTTTAGATATTACATATTTGATCGGTACATTATAG<br>TGTATTTTGGCACCCCTGGGTATTCACGT | C         | T       | ACACAACTACGAACAATGGCAGAACTTGACTAA<br>AAAGCTTTCCACCGAATTGGAGTACGGAATCAT<br>CTCCAAAGATCTCGGTCAAAGCAGGCATATGC<br>CA |                            | NA                          |
| Ca-II-SNP673 | 163.38                 | Ca- <i>desi</i> -LG(Chr)4 | 4494394                 | GTATCAGTAAGGTACATTAGGCTTCCTATCATTG<br>CTTGTAAGGGTAATGTCAACATCTGCTCCTCCTT<br>CTTTCTTAGAGGGTTTCACTCTTGGTACTA    | A         | T       | GATGCAGACAAAAGGGAAATTTACATGTGTCA<br>ACGAAAGTTCACAAGAGACATTCTCAACATATT<br>TAGTATAGATAACATCAATGGAGTAAGCAATCA<br>C  |                            | NA                          |

| Marker IDs   | Genetic positions (cM) | Chromosomes               | Physical positions (bp) | Flanking sequences/Forward primers                                                                          | ICC 12968 | ICC4958 | Flanking sequences/Reverse primers                                                                              | Annealing temperature (0C) | Amplified Product size (bp) |
|--------------|------------------------|---------------------------|-------------------------|-------------------------------------------------------------------------------------------------------------|-----------|---------|-----------------------------------------------------------------------------------------------------------------|----------------------------|-----------------------------|
| Ca-II-SNP674 | 164.37                 | Ca- <i>desi</i> -LG(Chr)4 | 4507431                 | TATGCAGCCTTTCATTTTTAGTTCCAATTCCTAATT<br>TTATATGATATTATTATAAATTTCAATCATTCAAAC<br>ATGAGGAGAGGGCTCTTCTTCATGGAC | A         | G       | AGCAAAAATATGAACACACTTTTCTTTGTTCGA<br>CTCAATCAAAGCTACCAACTTTTTCCCTTAATT<br>AACTTAATCTCGTTTAGCTTCTTAATTAGCTA      |                            | NA                          |
| Ca-II-SNP675 | 165.36                 | Ca- <i>desi</i> -LG(Chr)4 | 4514512                 | TTTTTTAGGCTCTATAAATAGAAGATCAACATTGTT<br>TTCAATGTCAACATTTTTAATGCGAATTTATGGGC<br>CATCATTGTCAAATGATGTTGATTCTT  | C         | A       | ACGTTTCTAACACAGTTCAATTCTACGACAGGA<br>TTGATTAACAAGGAGATTATGTGATCGACCAAC<br>ACAAGCTAGAAATCACTTGTGAAGTATCTAGT<br>G |                            | NA                          |
| Ca-II-SNP676 | 166.35                 | Ca- <i>desi</i> -LG(Chr)4 | 4540552                 | AATAAGAAAGTTTCTTCTTTATCAACTGAACAAATG<br>TTGGTTTGTAGTGTTTATCAATGGAGCAAATATTG<br>TTTGTGCATTTCAATTTATACCTGTTAT | G         | T       | AGGGAATCATATATGGCTTGCTGTGACAATTTT<br>AACACATAACACTACATATATCATATCAAACCTTA<br>TTATAATAATTGTTGCATATTGATACAACATA    |                            | NA                          |
| Ca-II-SNP677 | 167.34                 | Ca- <i>desi</i> -LG(Chr)4 | 4563041                 | ATAGGTTATAAGTTATAAGCGTGTTTTTTTAAACAT<br>TCCAAATAGATGCATTCAAGTAACTTATGAGCTTA<br>TCATTTTTCTCCAATTTACTTTTATTA  | T         | A       | AGTAAAAGATCAAATGAGAAAACAAAATATAAA<br>TGACTAAAACCTTTAACTGAAATTAAGTTAAGGG<br>ATCACAGATGCTATTTATCCATTTTTTTATTA     |                            | NA                          |
| Ca-II-SNP678 | 168.33                 | Ca- <i>desi</i> -LG(Chr)4 | 4580896                 | AAGAGCTCTGGTTCGACTTGGTGGGGTAGTGAGA<br>GTAGATCCTGGTGTATTTGGTCTGTATCAAAG<br>TTTTCTAGCAGTGTAGTTAGGAGTCTGGTC    | A         | C       | CCTAGTCGATGTGGGATTAACCATCACATTTAA<br>ACCCAATAGTCTCCCCCTCAAATGTGAGTCACC<br>CATATTTTGTACTTGTACCACCATTATTACAAA     |                            | NA                          |
| Ca-II-SNP679 | 169.32                 | Ca- <i>desi</i> -LG(Chr)4 | 4590227                 | CAAAAAAAAAATCTTAATATATGAACGAGTCATGA<br>AGAGGTTGTCTTGTATAATCTCTGTCACTTGGTC<br>AAATGCTTAGCTCAGTTTTTTCTTCTC    | T         | C       | AGTAGAAAGTAGAGAAGAGAGATTATGCACCT<br>GATGCAACTAGAAATGAAGAACCAAAGCAATAT<br>TCTTAGCTGGTAAAAATTGATTGAAATAGAATA<br>T |                            | NA                          |
| Ca-II-SNP680 | 170.31                 | Ca- <i>desi</i> -LG(Chr)4 | 4635664                 | GCTAGTGCGGGGGCAGTATTGGAGTTGCGGGTG<br>CGGGGTTGGTAATGCTTAAACCGTCCATGCTCC<br>GCCTCGTTGCCATCCCTAACTTGAATGTGTGT  | T         | C       | TTTTTGTATTTCTTCCAGGAAATTTATTTGATAT<br>TTGATTGATGAATATATGGTAAGCCAATTTCA<br>ACAAAGGCTCCACTGAGTAACAAGAGAGTACT      |                            | NA                          |
| Ca-II-SNP681 | 171.30                 | Ca- <i>desi</i> -LG(Chr)4 | 4654094                 | TTCTTGTGCACGACCTAAATAGTTTGCCAAGTAC<br>TTTCGCTTAGACAGAGGCAGAGGCTGGACCATGG<br>TAGACCCAGCCCTGGTCATACCATCTTCGAC | G         | A       | CTTAAAGTTTGTCTTTGGCAAACCAATGTAGG<br>GGGATCGCACTGATAAGAGAGATACTAGTGCC<br>TTTAATACATGGAAAGATATCATCATTCCAGGT<br>AA |                            | NA                          |

| Marker IDs   | Genetic positions (cM) | Chromosomes               | Physical positions (bp) | Flanking sequences/Forward primers                                                                             | ICC 12968 | ICC4958 | Flanking sequences/Reverse primers                                                                             | Annealing temperature (0C) | Amplified Product size (bp) |
|--------------|------------------------|---------------------------|-------------------------|----------------------------------------------------------------------------------------------------------------|-----------|---------|----------------------------------------------------------------------------------------------------------------|----------------------------|-----------------------------|
| Ca-II-SNP682 | 172.29                 | Ca- <i>desi</i> -LG(Chr)4 | 4663824                 | GACTTGTTGATTTTTGAGACAACAATCTGGTTTTG<br>GTGCAAGGATAAATTGTTTGAATTTTTGTTTGTATTT<br>GTATTTGTTTTGATAATTGCTCATTATATG | G         | A       | AAAATCGAACTTTGTCAAACCTTGCCAAACACA<br>ATTC AACCATCCCCTTCTTGATTGCACATT<br>CAATCCACAAC TATTATGATATTGATTTTAGTAC    |                            | NA                          |
| Ca-II-SNP683 | 173.28                 | Ca- <i>desi</i> -LG(Chr)4 | 4688141                 | AAACGCAGGTATATGTTGTTGTATAGTGCATACCC<br>ATGCTACCTTTCAGGTATTTGCTGTACGTTTTGTC<br>CCCGACCAGGGTCAGTGTCTTTGTCGTATT   | G         | C       | ATTTGTGTAATTGTTGAGTTAAATGTATAAAAGA<br>GCTCTGTGAATCATGTAAGAAATAAATGATGGT<br>GAATAAATTATGACAGTAGCAATGAATGCTCTT   |                            | NA                          |
| Ca-II-SNP684 | 174.27                 | Ca- <i>desi</i> -LG(Chr)4 | 4698858                 | GAACTCTATTTCTCTCTTAATTTTTTAGGAAA<br>GAACTAACCTCAAACCAATTTGGTTCTCAATTTA<br>TATGCTACAATGATGAATCGTTGCGTCT         | A         | T       | CACCAACTTTGCACTTCACCAAAAAATAGAAGT<br>CTCATCTTCACTTGTCACTTCATAATTTAAACAA<br>AACAAACAAAAATCGAAATTCATTTATCTCA     |                            | NA                          |
| Ca-II-SNP685 | 175.26                 | Ca- <i>desi</i> -LG(Chr)4 | 4702919                 | GGTTATGATTTTTATTTTTGTTGGTGCTTAGCT<br>GTGAAAATAATGAATGTTGTGGGAGATATATGAG<br>GAAATTGGATTAGTGATTACCCTTTTTGT       | G         | T       | TAAAATCTTACAAATTTCCACCCTCTCACAAACCA<br>ATCATATCAATATCAATATCAATAAATAAATAA<br>AAACATAAAATGGCTTTTCTGTAATAATTCA    |                            | NA                          |
| Ca-II-SNP686 | 176.25                 | Ca- <i>desi</i> -LG(Chr)4 | 4710255                 | CACACTACTACTTTTAACTACATTCCTCATGGTTA<br>TGGTCCCTTCAACTATTAATCTTAGATCGGTTTT<br>CACTCGGAGTGAGTATTGTAATTTCTAAA     | C         | A       | TGAACTTAAATATATCCAATCATTGCCAAAATAT<br>TGAAACTAATAAAAACTGTACAATTACAATA<br>TATCATTTTTACAGAGAAGAATAAATTCATA       |                            | NA                          |
| Ca-II-SNP687 | 177.24                 | Ca- <i>desi</i> -LG(Chr)4 | 4719601                 | TAGTGGAATCTAATGGTTGTGAGGACTGGACTA<br>GCCCAAATGGGTGAACCAGTATACCTTTTTGTG<br>TCATTTTCTATCCTTATCTTAAATTTTGTG       | C         | G       | TAATTAGTAAGCTCTTAATTGATGAGAACATTAT<br>GTACAATTTAAATGAAATCAAGAGGTTGTAAT<br>AAAAACAATGATAATGAAGTGTGATATGTGTGT    |                            | NA                          |
| Ca-II-SNP688 | 180.21                 | Ca- <i>desi</i> -LG(Chr)4 | 4732975                 | ATTAGCTTTTGTCTTGTGATCACACACGCACAATAT<br>TTGACATGTAGTTTATGTGTTTACTTATTGAAGCG<br>TTGGTAGTGTCTCTGTTTAGTCCACACGAA  | A         | T       | GAAAGAAACACTATATATGATACATTGTGTCTC<br>GTCTTAACCTAACCATAGAATCACCTTAAGTGA<br>TCGTAGCTAACACTGACACATTCGATACAAC<br>C |                            | NA                          |
| Ca-II-SNP689 | 181.20                 | Ca- <i>desi</i> -LG(Chr)4 | 4778314                 | CCTTATCTCCTTTTTATTTTTACCTGCACAACACT<br>AATTATTTGTGAAGTTTTATTGTTACATTCTAAC<br>AAAGAACATTATGTCTTTATTAATCAA       | A         | G       | GTAATAGAAATGACAATGTTGATTACAAAAAT<br>GGGGTTTTGAATTTGATTCCCTTTTAAAT<br>AATTTATGTATTAATTTGTTAATTTAAATTTGAT        |                            | NA                          |

| Marker IDs   | Genetic positions (cM) | Chromosomes      | Physical positions (bp) | Flanking sequences/Forward primers                                                                            | ICC 12968 | ICC4958 | Flanking sequences/Reverse primers                                                                               | Annealing temperature (0C) | Amplified Product size (bp) |
|--------------|------------------------|------------------|-------------------------|---------------------------------------------------------------------------------------------------------------|-----------|---------|------------------------------------------------------------------------------------------------------------------|----------------------------|-----------------------------|
| Ca-II-SNP690 | 182.19                 | Ca-desi-LG(Chr)4 | 4795454                 | AATAAATACTTTAAGTTTGTATCTTACTTAGTTTAAA<br>TATTTGCTTTTGAAGAGAGTGGTTGACTGGGGT<br>GTTTGGTGCTATTTTTCCCAATAGTATACT  | G         | T       | TGGTTATTCCTTCCTCCAGCTGATTCATGTAA<br>ATATCGTGTATGCTAAAAGGATTGAAGGAACAT<br>CAAAGTTTTTATTAATATCCCTTTGGGTTTCAAG      |                            | NA                          |
| Ca-II-SNP691 | 183.24                 | Ca-desi-LG(Chr)4 | 4809998                 | TTATCATAATTTTAAGCATCAATTTATGCTAGTTAT<br>TTGACTTTTGAGGGAAGGCACCTTGAATTTAGGAA<br>GAAATTCCTGCTACCCATCTTTATCC     | G         | T       | TCCATTTGTGAACCAACAAAACGCTTAAGCCCA<br>CACAATAAATAACATAATAGAATATGTTATGATA<br>TGACATCCAGCAATCAATCCATTATGAAGGCTG     |                            | NA                          |
| Ca-II-SNP692 | 186.39                 | Ca-desi-LG(Chr)4 | 4821489                 | TTAGATAGTCAATCGCGATGGTTCACATCGCAATC<br>GAGGTGGAGTGTGGCGATAAGGGCATGGCCACG<br>ACGATGCAATGCAGCGCGGGAGGAGACAGGT   | C         | A       | AGGGTAAAATTGGTCTTTAAAAAAAAGAAAT<br>CACATTTTTAGAGTTTTGAGAACCCAGGACCCG<br>AAACACGATATGCGAACGCGTCCAATTGCAC<br>GC    |                            | NA                          |
| Ca-II-SNP693 | 187.44                 | Ca-desi-LG(Chr)4 | 4831174                 | CTCGTCGCGATCTCTATTTGCGCTCCCTTCTATC<br>TGTTGAGTTTTGGATTGATAGAAGAATACGGTGT<br>TATTCCTTGACGAAAGTAGAAAAGACTGG     | G         | A       | GATAATTTTTTATAAAGAGTAAATCATTAAATA<br>AATAAAATAATCATTGTTTTTAAAGTAATTTGA<br>GACGAAACGGATAACTTGAGAGGTAACCTAAA       |                            | NA                          |
| Ca-II-SNP694 | 188.49                 | Ca-desi-LG(Chr)4 | 4847066                 | CTCTTCCAATCTTTTGTAGAACTTCCAAGCTTGAT<br>ACCAAAAAGAGTACGTACCTCTCTTTCTTTTTTGA<br>AATTTGTTAGATATATAGGTGTTTGT      | C         | A       | TTCCACTTGAGATCAACAAATGCACTATCTAC<br>TAGAACATGTTCTTATGATTTAAGTAGTAATAA<br>ACAAATAAAATTAAGTTCCTACTTTCACCTTA        |                            | NA                          |
| Ca-II-SNP695 | 189.54                 | Ca-desi-LG(Chr)4 | 4864461                 | GATGCACTTACC GTTATGAGTGTGTTATTAATGT<br>TCTTACGCAGCGGTCTTGTCTCCAAAACATTACA<br>CATTACAAATTAATTTACTACTCATTAG     | T         | C       | GAGAATTGATATCTTTAAAAATATAGAGAAATG<br>ACGTGTCTTAAAACCTTAAGCCAACACCAAACC<br>TTGAATATGAATTAGAGATAGATGAGTTTTGAC      |                            | NA                          |
| Ca-II-SNP696 | 190.59                 | Ca-desi-LG(Chr)4 | 4880696                 | TACAAC TAGACTTATAGAGTGTGAGTTTGTAGGAC<br>TAGACATATGGGAGTGGTCTAATGGATCTAAGAG<br>CATCTCCAACGGTTGCAAAATGAGTTCGTCC | G         | A       | ATGAAAGTACCGTTCCTTCATGAGAGAACCCTG<br>ATGACAGCTTGACACATCTCCAATAGTGAACCTC<br>GCCAAAAACTGAATTTTACGTAACACACGCTG<br>G |                            | NA                          |
| Ca-II-SNP697 | 194.79                 | Ca-desi-LG(Chr)4 | 4971795                 | TTTTGTTGACTATTTCTCTTATATTTAAACTGAA<br>GAATATTTATTTAGCTGAGTTCGTTCCCAATTC<br>GACCTTTATCATAAATATCACTAGTTACT      | G         | T       | TGTATATTTTTATATCAACAAGATTGTGTATAA<br>ATGTGTGTATCTAGCATTGTTCTACCAAAAAC<br>CAGTGTTTTTATTTTTATTATGATTGAATGA         |                            | NA                          |

| Marker IDs   | Genetic positions (cM) | Chromosomes               | Physical positions (bp) | Flanking sequences/Forward primers                                                                             | ICC 12968 | ICC4958 | Flanking sequences/Reverse primers                                                                              | Annealing temperature (0C) | Amplified Product size (bp) |
|--------------|------------------------|---------------------------|-------------------------|----------------------------------------------------------------------------------------------------------------|-----------|---------|-----------------------------------------------------------------------------------------------------------------|----------------------------|-----------------------------|
| Ca-II-SNP698 | 195.84                 | Ca- <i>desi</i> -LG(Chr)4 | 4981638                 | TTTTGTTAAAGAGGTGGAGAATGATTGGTCAATAT<br>GCTGTGATGAACATTCTTGAAATGGAGATCATTCT<br>TCTGTTTTATGCAGAAATGTTCTCATTGCT   | A         | G       | TAATTAAGAACTTAATTATGATTCTAAAATGTT<br>AAGTTAATTTAACTTGTTTGGAGTGAATTTA<br>ATAAAGAACAAAATCAAGCAAAGCAGAAAAGA        |                            | NA                          |
| Ca-II-SNP699 | 196.89                 | Ca- <i>desi</i> -LG(Chr)4 | 5035097                 | AATATACCTATTGTTCTTTAAGTTTAGTCTAATTCT<br>TCCTTAGGTCATTTAAGTTTATTGCTTCGAGTT<br>GATTCTTTAAGTTACATGCATAACCTTAA     | A         | G       | AGATTTAGTCGAAACATCGCAATAAATTGATTG<br>TCCATTACTTTCAAATGAAACGAGTTAATGACA<br>TTGATTATATGGATATATTTTATTACTATGTT      |                            | NA                          |
| Ca-II-SNP700 | 197.94                 | Ca- <i>desi</i> -LG(Chr)4 | 5089894                 | AATTTATGAATGTCTGTGCAGGGACTTGATTTTAT<br>CAAAGATGATGAAAATGTGAACCTCCAACACTCTTA<br>TGTGTTGGAGAGACCATTTCATTTTGTG    | T         | C       | ACAGAACTCTTTATCATTCTACACATGTGTCT<br>GCAGTAGCATATAAATATGTCCTTTAATTTTAC<br>TTTTTCAACCTGTGATTAAATAAATTGCTTCT       |                            | NA                          |
| Ca-II-SNP701 | 198.99                 | Ca- <i>desi</i> -LG(Chr)4 | 5111270                 | CCCATTGATGCACCTTATGCCATCCGTAATGTATA<br>CAACCGCCTCATCAAATGAACCTCATTGAGGCTC<br>ACGGTTTTTGTGCATGCTAGAAAGAGTTG     | G         | A       | ATAGATTGATGATGGTATGTATCAGAAAACTT<br>GTATTAACGTTATCTATAATGTTGCTTTTAAACA<br>TTGCAAAAGAAAAAACCATAAATAGGCTTATG      |                            | NA                          |
| Ca-II-SNP702 | 200.04                 | Ca- <i>desi</i> -LG(Chr)4 | 5128637                 | GTGTGGCGAAGACTTGACTTGTAGGGTCAAAGTA<br>TTTGTGCTTAAAAAGTATGTAGGTGTTAGGTT<br>GTTTTGAGAAGACTGACTTATAGGGTTAGGT      | G         | C       | TCTAACATCTTTGTGCATGGTTTACCACCACTTT<br>GTAGCTACGACTAGTCCACTCTCTCGGAAGAAT<br>TTAATCCATTAATTCAAACCTGAATTACACAT     |                            | NA                          |
| Ca-II-SNP703 | 205.29                 | Ca- <i>desi</i> -LG(Chr)4 | 5144601                 | TCTAAATGTTTCCCTTCTCTATATTTGGACATTCT<br>GATTTGATAAGTCCAAATTTGTTGCATCCATAGTA<br>GATGATGCTTTTCTTGTGCGTTTATCAT     | C         | T       | AGAGGAATTGGCTTTCATATGTTAAAAATTTA<br>GAAGATGTGGCACAACAGAAAAATAAATTTCC<br>CCAAAGATATTCCAAGCAATCCAATAGAGGAAA<br>T  |                            | NA                          |
| Ca-II-SNP704 | 206.34                 | Ca- <i>desi</i> -LG(Chr)4 | 5164229                 | GAAGGGAGCGGAGCAACCTCTTGGTCAGTTTTAG<br>CTCTCCAAAAGTGGGAAGTTTTAGGTGAGAATATT<br>TGTTTAAAAATTTGAACCTTAAATATCCTTTTA | T         | G       | TGGTTCGACGAGGGGAGGGGAGGGAAGAGAT<br>TTTAATAGATGAAAGGTATGAACTATGAATTTAC<br>TTTTTCCACCCTTGAATATTTACTATCATATTA<br>A |                            | NA                          |
| Ca-II-SNP705 | 207.39                 | Ca- <i>desi</i> -LG(Chr)4 | 5228872                 | ATTGCAGAAAGTGATGTTGCCTCTGTTTTGCAGA<br>ATTTCAAGCTTAAGTGAGATTGTATTTGGTT<br>ACTTAGCACCTTGAATTTTTGCCTTCATAC        | G         | T       | TTCTAAAATAATGTTTTAGTCAAAAAAGCATGG<br>CCTCTCCAACAGCTATTTCTGACTTATCCAGTG<br>CATTCTCAGCTTATAAATAGAGGGATTCAATCT     |                            | NA                          |

NA

| Marker IDs   | Genetic positions (cM) | Chromosomes      | Physical positions (bp) | Flanking sequences/Forward primers                                                                            | ICC 12968 | ICC4958 | Flanking sequences/Reverse primers                                                                                                                                                                                                                              | Annealing temperature (0C) | Amplified Product size (bp) |     |
|--------------|------------------------|------------------|-------------------------|---------------------------------------------------------------------------------------------------------------|-----------|---------|-----------------------------------------------------------------------------------------------------------------------------------------------------------------------------------------------------------------------------------------------------------------|----------------------------|-----------------------------|-----|
| Ca-II-SNP706 | 208.44                 | Ca-desi-LG(Chr)4 | 5405499                 | ATGTTTCTTTGTTTTATCATGTTTGTCTTCATATCA<br>TCAAGTACAACCTTCTCTTCCTGAGACAACGACC<br>TAAGAAAGTATGATCAATAAGTTATTTGG   | T         | C       | TAGAAAATGTGAATGTCCATTAGATTGAGAGG<br>AACACCATCAAGTGTGGTGATAGATGGTATCT<br>ACATGTAATATGTGGTGTCCATAACCACAAATT<br>G                                                                                                                                                  |                            | NA                          | NA  |
| Ca-II-SNP707 | 209.49                 | Ca-desi-LG(Chr)4 | 5451471                 | TGGATTATGGTTTCAAGGTGCTGAAATTGCAATG<br>GCTTCTTATTGTTCTGAGTTGCAATATCTTGCTAA<br>CCCTGTCACTACACATGTTCAAAGTGCTGA   | A         | G       | CAATCAAGAAAGTTGAAGACATCAACTTTAAGA<br>TCTCAATAGCCTCATTGTTTTCTAGATGAAAT<br>CAAACCCAAAGAGTTAACATCTTGGTTATGTTG                                                                                                                                                      |                            | NA                          | NA  |
| Ca-II-SNP708 | 210.54                 | Ca-desi-LG(Chr)4 | 5483523                 | ACTTTATTCTCTAAAGTTAGTTGCTCATTITAGAGG<br>AGTCAAATCCTAAATATTATACCAACATTTAGGC<br>TTGTTGAATTGACTTATTTGAACTTAT     | C         | T       | ACTTATGAAAATAAACTGAAAATAGCTTATGGT<br>CATTTTCATTAGTTGTTTAGCTGTTTCATAAACTC<br>TCCTGAATAGTCTCACAAAGTTTTATGTTAATA                                                                                                                                                   |                            | NA                          | NA  |
| Ca-II-SNP709 | 211.59                 | Ca-desi-LG(Chr)4 | 5528932                 | GGTCTGGAGGATTCACACGATCAGGTACAGTGAT<br>TCCAATGCCAGCAAAGTATTCTTCTACTTTTTAAAC<br>AGGGCCGTGATATGCCGTAAGGCCACCTTT  | T         | G       | TGTTCTTCAAACATTCACACATAATTTAAATCT<br>TACTTTTGATTTATTGTGATACAGCTATACTTTG<br>TTCAGAAATGTTGATGATAAATTTCTAGC                                                                                                                                                        |                            | NA                          | NA  |
| Ca-II-SNP710 | 212.64                 | Ca-desi-LG(Chr)4 | 5544750                 | AATCAATTTGCTGACACCATATGGTTACTTAATGC<br>TAACTGGTTTTACTTTTTGAATAGTGAAGTGTTT<br>GGAAAGTCTTCATCATATATCACCTTCAA    | T         | C       | AAACACTTTCATCGCAACCTTACCAGAATCACAC<br>TGCATTTTCAAAAATGAAATAAAATAAGAAG<br>CATAAAGTCATTGAAAATCAACACAGCATCTAA                                                                                                                                                      |                            | NA                          | NA  |
| Ca-II-SNP711 | 213.69                 | Ca-desi-LG(Chr)4 | 5611371                 | GGACACATGGAGCAGAACCAGAGCTTTGTCAA<br>AATTTCCCTCACATTAGCCTCACTTTCTCAAACC<br>ACATTGTGAGTAGCTCAGGACCTTTGATACT     | A         | G       | GAATGTCACCTTCAAAGGGGTTCTGTTCTATG<br>GTCTCCTGGTTGTGGTAAAACCCTTTTGCCA<br>AAGCTATTGCCAATGAATGTCAAGCAAACCTCA<br>T                                                                                                                                                   |                            | NA                          | NA  |
| Ca-II-SNP712 | 214.74                 | Ca-desi-LG(Chr)4 | 5678633                 | TGCGGCGGTGGAGGCTTCGTCGGCAGACAATGT<br>GCCGTAGCGTTTTAGAAAGGACTGAGGGAGTGGAA<br>AATGTTTGGATCAAGCGGTTTATGACGGCATCC | A         | G       | CGGCGATGGCGCTGCGTGATGTTTTGTTGAGG<br>GGGATGAAGTTAGGGCGAAGGAAGCGGTGG<br>AAATGGGATTGTGAACACGGCGCACGATAGT<br>GAGGATGGGACAGTAGAGGCTGCAATGCGCAT<br>GGGGGAGGAGTTAGCAAGGAAGAAGTGGGTG<br>GGTGACGTTTATGGTGAATCAGGAAGAGATT<br>GTATCCTCAAGTTTGTGGTGTGTTGGGTTAAC<br>TCTCCAAC |                            | NA                          | NA  |
| Ca-II-SNP713 | 215.79                 | Ca-desi-LG(Chr)4 | 5726782                 | TTTTGAAACGCTTATCGACAACTGAGTTTCATTT<br>GTAGCTTCATTTGGATGATGCACTCATCTTTATT<br>AAAAACTATCTTGTATCCTTTGTCAAAAAG    | C         | T       | AAATTTTAGGCATTGAAAAGTCCGTACAACAC<br>CATCCCCCTCGATTGAAGATGTCTTATATGTCG<br>AAGGTCTAAAACATAATCTCATAAGCATCAGCC<br>A                                                                                                                                                 |                            | NA                          | 141 |

| Marker IDs   | Genetic positions (cM) | Chromosomes      | Physical positions (bp) | Flanking sequences/Forward primers                                                                           | ICC 12968 | ICC4958 | Flanking sequences/Reverse primers                                                                                | Annealing temperature (0C) | Amplified Product size (bp) |    |
|--------------|------------------------|------------------|-------------------------|--------------------------------------------------------------------------------------------------------------|-----------|---------|-------------------------------------------------------------------------------------------------------------------|----------------------------|-----------------------------|----|
| Ca-II-SNP714 | 216.84                 | Ca-desi-LG(Chr)4 | 5767017                 | GTTGACCTGTTTCATTACTCCTTGTGTAATAGTCA<br>TTTGGTGCCTGCTGAAAACGACCAGTGTGTTGAGT<br>AAGGTTCCCTTTCTGTCCCTGATACTCTAA | G         | A       | GCGTTGGAACGCATCCTAATGCTTTTATGAGA<br>AACATAATTGGAGACTAGATTCTGGAGAAAAGG<br>TTAAGTACCCCAATGCATATAGTTTACCTAGGC<br>C   |                            | NA                          | NA |
| Ca-II-SNP715 | 217.89                 | Ca-desi-LG(Chr)4 | 5817107                 | CACCTGAGGATACACCATACCACCTTATTCCAGAG<br>CCAACCTCTCCATTGCGTAACTCTCCTGATACTAC<br>TCCTTCTCATGCCTCACTTGTCCCTACAAC | C         | A       | CATCTTTCATATGTTGAGGAGAAGTTGATTTTG<br>AGGCATCCTCAGGGATAGGATCGGCTTCACGA<br>AGGGGAGTCAGTTTGTGGATTGGTGATAGACTG<br>AGT |                            | NA                          | NA |
| Ca-II-SNP716 | 218.94                 | Ca-desi-LG(Chr)4 | 5907659                 | GGTCGGTTACGGTTGCCGATGGATCCAATTTCTT<br>CATCCGAACCCGACCACGGTAGACCGTGTATATC<br>CATCGACGTTACCCGCGAGATCCGACAACCC  | G         | A       | GTGTTAGTCATAATCAAAATTTTAGGGGTGGA<br>CAGATTTTCCACACCCGCCATAATCGTCCAAC<br>CCATACGACCCACAAGCAAACGGGTGTTTGG<br>AT     |                            | NA                          | NA |
| Ca-II-SNP717 | 219.99                 | Ca-desi-LG(Chr)4 | 5934551                 | ATAAACCAGAATGTTCTTCTGATCAATCTGTCATC<br>AATCTGGAGATCAATATGCATGTTTGTGTTTGC<br>TTATGCCTTCAAATCTTGAATTTAATTGC    | T         | C       | TTATTC AATTAAAGAACAATTGACAAAATGGATC<br>TTTTTAGAATAGCAACATGTAGTAAATCAGCTG<br>GCATTTGCGACATGGTCTTCCCAACATTTAATG     |                            | NA                          | NA |
| Ca-II-SNP718 | 221.04                 | Ca-desi-LG(Chr)4 | 5971039                 | CGTAGTCAATCAGCAGACTCACACAAAATCAAAGT<br>ACGGCTCCTTCTTGATGAGGCCTCTACCCCAAGA<br>AGATCGCCACCAGTTTCTAGTTGGATTTCTA | T         | G       | TAACCAGATTCGTGAGAAGACACATTGTTCAAG<br>ATTGAAGACTTCTTTACTACTTCTTTTATTCTG<br>TTTGAAATAAATCTTTGTAGAGAAAACGACTG        |                            | NA                          | NA |
| Ca-II-SNP719 | 222.09                 | Ca-desi-LG(Chr)4 | 6005969                 | GTATTCAAACCTGGAATGGAGAATCTATTACC<br>AGCTTGAGGGGGAGTGTCAAATCTGTTTCTGTTT<br>AATATCCCTCAAGTATTGGGATTCAGTTGA     | C         | A       | CCTATTAGTACTGATATATAACTACATCCCTATT<br>AGTACTCATATAAATAAATCCCTATTAGTACT<br>CATATATAACTAAATCCCTATTAGTACTCCTA        |                            | NA                          | NA |
| Ca-II-SSR198 | 223.14                 | Ca-desi-LG(Chr)4 | 6006092                 | ATCAGTACTAATAGGATTTGGTTGTTT                                                                                  | (TA)7     | (TA)6   | CAACCCCTTAAACCTACACATTG                                                                                           |                            | 57.11                       | NA |
| Ca-II-SNP720 | 225.24                 | Ca-desi-LG(Chr)4 | 6031929                 | TTATCTTTAGTTAGAGGCAAATGATCATTGTAACG<br>TTCTTTTCTTTGTAATCAGATGATCATTCTTGAC<br>TTATATTTATTTTGTCTTTAATGCTTTGA   | C         | T       | TTACCTAATAAACAACAATTATGTTTACTAATT<br>ATTACAATAAGTCATGATATAGAAATAAGAAGC<br>GTTGCAACAAGCATATGATAATCTATAGTTCGA       |                            | NA                          | NA |

| Marker IDs   | Genetic positions (cM) | Chromosomes      | Physical positions (bp) | Flanking sequences/Forward primers                                                                           | ICC 12968 | ICC4958 | Flanking sequences/Reverse primers                                                                               | Annealing temperature (0C) | Amplified Product size (bp) |    |
|--------------|------------------------|------------------|-------------------------|--------------------------------------------------------------------------------------------------------------|-----------|---------|------------------------------------------------------------------------------------------------------------------|----------------------------|-----------------------------|----|
| Ca-II-SNP721 | 227.34                 | Ca-desi-LG(Chr)4 | 6062333                 | TTGTTTGAGATTGGTTTGTGTTTTAAAAACAAT<br>TTCTAGATTGATTTGTTTGCATTTGAAACTAGTTTA<br>CAGATTGATTTGTTTGCATTTAAAACTA    | T         | G       | AAACCAATTATCAACAAACCAATCTGAAAACCTA<br>GTTTTAAATGCAAAACAATCAACTTCTTACTTTC<br>AAACAAACCAATCTGGAACAACCAATTGTAA      |                            | NA                          | NA |
| Ca-II-SNP722 | 229.44                 | Ca-desi-LG(Chr)4 | 6098301                 | GCAATTTGTGGATCTCAGTTGTGTTGAGAAGACT<br>TGACTTGTAAAGTTAATTGAGTAGTTTGCATCTAA<br>CAATTTGTAGGTTTCAGGTTGTGTAGAGAA  | G         | A       | GAACACAACCACCTTGACTCTACTAGCCAAGTC<br>TTCTCCACACAATCTAACAGCCCCAGATTGTTG<br>AAGGCATACAACACCTTGACCCTACAAGTCAAG<br>T |                            | NA                          | NA |
| Ca-II-SNP723 | 232.79                 | Ca-desi-LG(Chr)4 | 6134862                 | TTTCAATATACGTGACTTTAATTTGTTTCTCAATT<br>TGTTTGAACCTAAATTCGAAGCCCTTTTTAATTT<br>ATTGATTCTAAATTCGGTTAATATAGTC    | T         | C       | TTTTGTGTTAAAAGATTGATCTATTGTCGCGC<br>ATAAGTCAAATACAAGCAATAAACGTTGCATA<br>GGGGCAACAACCTCGAGTCGTTTCGCAAGGACT<br>TC  |                            | NA                          | NA |
| Ca-II-SNP724 | 233.94                 | Ca-desi-LG(Chr)4 | 6152405                 | GACTTAAATGTACCTCCGCTCATTGTTAAATCT<br>GGTGGCACGTAACCGACTTAAATCTGCCGATTAA<br>AAGCCCAATTTCTACTAGTGTGTTAGTGA     | T         | G       | TATTTATACAATTGTTGCTAAGTTTTGGCTAAC<br>ATGTTGAAAACATTATGCCCTATGTAATGGGT<br>TCTTCTCATAGTGATTTTGTGCTATTAGAATC        |                            | NA                          | NA |
| Ca-II-SNP725 | 235.09                 | Ca-desi-LG(Chr)4 | 6204689                 | TGATAATGAGTAACCTAAGCTCTCTCTAAGGCTT<br>TGGTGAATCTCGTGATTAAGATAACTTTTTACTAT<br>GTCTTAGTTTTAAATCTAGTTTTATTTTA   | G         | T       | GTATCCCAAACATTTAAATAAAACAATAGAATA<br>ATGTAATTGAGATAAACAATCAAATCTAAAATA<br>AAACTATAATTTAAAACCTAAGACAACCAAAT       |                            | NA                          | NA |
| Ca-II-SNP726 | 236.24                 | Ca-desi-LG(Chr)4 | 6230253                 | CTGGGCTTTGCCCTCAGATGAGAGTCAGGACGAT<br>CCTACCGGTTTCGTACCTACGGACGGGAATGGAG<br>ATAGGAACGCTTGACTGCAGCTACGTTAGGAG | G         | C       | AATACAAAAGAAAGACATCTGATCCCTCTATGC<br>CAACCTAATCTGATCATTTTTACAACACAACATAA<br>CACCTGAGTGATCTCCACGCGCCCCGTGAGA<br>T |                            | NA                          | NA |
| Ca-II-SNP727 | 237.39                 | Ca-desi-LG(Chr)4 | 6316674                 | TTGAATTATAATTTTATTATTGCAATTTAATTTTAT<br>TATTTATATTTTGACTCTTTCTCGCTCTGTAGGTCA<br>TAACCTGAGCTCTGGATATCGGATTGG  | T         | C       | AAATTTGCAATTTGGCCTAGTAAAGTTTGGAA<br>TTGGTCTTTCCCTTCCAACACAAGGTTATAGCT<br>CAGAATTTTATCTTTCTAACGCCTACTCATATGT      |                            | NA                          | NA |
| Ca-II-SNP728 | 238.54                 | Ca-desi-LG(Chr)4 | 6331712                 | ATGTTATAATAGGTTAAGTTTGTGTTTTCTTAGTG<br>ATTGGTTTATAAACATCAATTTATGTTCTTTTT<br>TTTAGTATTTGTGTTGCAAAAACAATTTTA   | G         | A       | AAATGTAGTTTGGTTTTTTTTTTGTTTTTTTTTT<br>TTTTGTCTGTTTATGCAAAAATAAACTCATATGT<br>TAAGCTTCAATTTTCTTAAGTTGTTTGTTC       |                            | NA                          | NA |



| Marker IDs   | Genetic positions (cM) | Chromosomes               | Physical positions (bp) | Flanking sequences/Forward primers                                                                            | ICC 12968 | ICC4958 | Flanking sequences/Reverse primers                                                                              | Annealing temperature (0C) | Amplified Product size (bp) |    |
|--------------|------------------------|---------------------------|-------------------------|---------------------------------------------------------------------------------------------------------------|-----------|---------|-----------------------------------------------------------------------------------------------------------------|----------------------------|-----------------------------|----|
| Ca-II-SNP729 | 239.69                 | Ca- <i>desi</i> -LG(Chr)4 | 6341251                 | TTCTAACCCGAAAAATTTCAAACATCTGGTAGTTAA<br>TTTTATTTTTATTTTTATAATTTTTTTTAAATGTTTTT<br>GTTAATTTATTTTTTTTGAATAGAGAT | G         | C       | CGACCTCTCTTGCCCATGATATGACAGCTTCTC<br>GTGAATCAAAAATTTGATCAGTTGTGAATGCCT<br>CAGTTAAATCTATAAATACTGGTTGTGTCTTTTC    |                            | NA                          | NA |
| Ca-II-SNP730 | 240.84                 | Ca- <i>desi</i> -LG(Chr)4 | 6354569                 | AGACCAAACCTCATCTTGAGGTTGAAAGATCTC<br>TGGTGATAAACTAACCCAGCACCTATGATCTTGTG<br>AGCAAATGCAATACCTTTATGTGAGGGTTGT   | T         | G       | TCTCGAAATGCCGGTAGTTCCTTTATAGTTCC<br>CGAGCTTAACTTCGGCATAAGGATCGCAACTTC<br>CGGTGACATCCTTTGAAGGTAATTCCTTAGCCT<br>T |                            | NA                          | NA |
| Ca-II-SSR199 | 241.99                 | Ca- <i>desi</i> -LG(Chr)4 | 6361616                 | TTGAGATCAGAGGGTGCAAA                                                                                          | (TAA)9    | (TAA)7  | CGGAGACCAAAATAAATAAAAGG                                                                                         |                            | 59.37                       | NA |
| Ca-II-SSR200 | 244.29                 | Ca- <i>desi</i> -LG(Chr)4 | 6388052                 | TAAAATGGGTGTGCGAGACA                                                                                          | (AT)8     | (AT)9   | CCCATGGATTATATACGTGGAA                                                                                          |                            | 60.11                       | NA |
| Ca-II-SNP731 | 245.44                 | Ca- <i>desi</i> -LG(Chr)4 | 6455248                 | TTTTCATTTGATTGATGATGTCTCTTAAACTTTTCA<br>AATCAGGTTGCTTGAACCTTAAAGTAAAGTTTTT<br>GTTTTTCCCAATTCATTGTCCACTTTAA    | T         | C       | TTCATATCTCATGACATTGTTTCTTTTGAAAAAT<br>GAAATGGCATTTCATCAATTTTCAAGATTGT<br>GGGGAATCATAAGGACCTTAGTCACATGTTAA       |                            | NA                          | NA |
| Ca-II-SNP732 | 248.89                 | Ca- <i>desi</i> -LG(Chr)4 | 6499244                 | GTATTCTGCCTCAGCGCTGGATCTTGCAACACAT<br>TTTGTTTCTTACTTTTCCAAGATATAAATTTCTC<br>CAACAAGTACACAATACCCGGAAGTTGAT     | T         | C       | AAAAGTGCACCTGGAAAAGGTCTCATTATGAA<br>GATAGAGGACATACTCAAATAAATGGCTACTCA<br>GATGCAGATTGGGCAGGCTCACCCATAGATAG<br>AC |                            | NA                          | NA |
| Ca-II-SNP733 | 251.19                 | Ca- <i>desi</i> -LG(Chr)4 | 6547630                 | TAATTTATCACTTTTGGAGATTAATCCTGCTATTTA<br>TTCTTTATGCATTGCTTTGACTTTGTTGATTCTTTT<br>GACGAATCTGTCTAAAAAATCATGAGT   | A         | G       | AGAACAAAGCTTTCTTGAATTCTAGATCATTCTA<br>GGCTACGAAAATGCATCAAGCTACATGGCAAAT<br>CACCAGTATTTATTACAAAGGAACAAAATTGTA    |                            | NA                          | NA |
| Ca-II-SNP734 | 252.34                 | Ca- <i>desi</i> -LG(Chr)4 | 6576650                 | CGTGATAGTGGCACCTCGGTAAACAGTACGGAC<br>CCGTGATAGGTAGTACGTTTACGACTTACGTTTCT<br>GCGGGAATTGCGTTTGTCCGTGAGAGACTGC   | G         | A       | TACCAAAACACACATAAGTAAACGAGACATTA<br>GAGATTCCCCATTCTTAATCTCATCTAACTTAA<br>ACCAGTGCGTAGTCTCTCACGGACAAACCCT<br>G   |                            | NA                          | NA |

| Marker IDs   | Genetic positions (cM) | Chromosomes      | Physical positions (bp) | Flanking sequences/Forward primers                                                                     | ICC 12968 | ICC4958 | Flanking sequences/Reverse primers                                                                      | Annealing temperature (0C) | Amplified Product size (bp) |     |
|--------------|------------------------|------------------|-------------------------|--------------------------------------------------------------------------------------------------------|-----------|---------|---------------------------------------------------------------------------------------------------------|----------------------------|-----------------------------|-----|
| Ca-II-SNP735 | 253.49                 | Ca-desi-LG(Chr)4 | 6652484                 | ACTGTGAAAAATCCAGTATGAAACTGGTGGCGATCTTCGTTGATGTAAAGATCATCAAGAAGGAGCTG GACTTGATCTTGTGTGAGCTGACGAGTGAC    | A         | T       | AATAGAAGAATTGAGACTTGTTACAGATTGTCCAGTTTCCTCGAAACCTATCTATCTAACTCAATCTTTCTATTCTTAACCCCTTGATCCTTGC          |                            | NA                          | NA  |
| Ca-II-SNP736 | 254.64                 | Ca-desi-LG(Chr)4 | 6685518                 | TAAACCATTTCCTTCTCCCTAAATTTCTAACGAAATATGCATATGTGTGAGAATATCATGTAATTGTTCTTAATCATTTCCCTCTCTTGTGAGCATAA     | A         | G       | GTGCGGCAATGAGAAGAGGTGAGGAGTGAAAAGAAAAGGTACAAATGAAAGGGAAAAGAAAAGATGATCTAACTCTACTCATTATATTGTTTTAATTA A    |                            | NA                          | 157 |
| Ca-II-SNP737 | 255.79                 | Ca-desi-LG(Chr)4 | 6750199                 | CAACAAGTCCATACGTATCAATTGAAGTGATCTTAGGTTGATACAACATCTTGGGTTTGAAGGAAACCTTAGTTGCTTACTGATCATAGCATTGG        | G         | A       | ATAATTCAAATTCGACCCAAAGTTTAGAAACAA GCTAAAAATATTATTCTAATCTATAAAGAGCTTT TAAAAACCAAACATAAAAGCTAGAAACATGTG   |                            | NA                          | NA  |
| Ca-II-SNP738 | 259.24                 | Ca-desi-LG(Chr)4 | 6783507                 | ACCTTGTTGTTGACGGGGCTCAACATAATGGGGCATGGGATGGGGTTGTTTTAATATCTCCAAAA AAAAGGTTCCATACCTATCACAGCGCATTGT      | A         | G       | ATCTCCATATACTTCTAGAACTTTTGCTTTCGAT TCCAAAGCCGCCAAACCTCCCATGGCACAAAGC TTCATATTCTGCCATATTATTGGTACAATCAAAA |                            | NA                          | NA  |
| Ca-II-SNP739 | 260.39                 | Ca-desi-LG(Chr)4 | 6805570                 | TTGGATTTTATTTGATATGGTTTTGATTTTTCACT TCAATTTAGCAATAGGACATTGTTGGAATTTTCA GAATTGTTATTTGCAATTGCAATTGTTAT   | A         | G       | ACTAGCAGCTCTATTAAGTCTACGACGTAATAA AAATTTCTATCTATTTCAAGTTCAAAGGAATGA AGATTACAGAACTAGCCTTAGTCATGCATCAT    |                            | NA                          | NA  |
| Ca-II-SNP740 | 261.54                 | Ca-desi-LG(Chr)4 | 6813661                 | GGTTGAGATGCTTGCTAGTAGAAATCCCTTTGTG GGAAAAACCTCTGCCAGCTGTGTGATCCACTGC GATAGTACCGCAACTATTGCAAAATGAGAA    | T         | C       | TAATGGCAGATGATCCACTATAACAGCTCCTT CAGAAAGTAATTCTTAACAGTGTGTGCTTAC GACGTATTTGTCATCTCTTACCGTTGTAATAAT G    |                            | NA                          | NA  |
| Ca-II-SNP741 | 262.69                 | Ca-desi-LG(Chr)4 | 6852383                 | TCGAGGACTTAATCCACTATTTAGTAATAGCATA CAAGTATTGTTTACTCTACCTCTCAGGCTTTTAG TATTCCTCTAGCCTCTCTAGATTGTCAC     | T         | C       | TTATCCTGATAGTGGCAATAATCTTTTACCCTT AAGAGGTACAACAACACTTATGAACCTCAACAA CATGTTGTCAGAATGTTGAATAAAGGTTCTAAC   |                            | NA                          | NA  |
| Ca-II-SNP742 | 263.84                 | Ca-desi-LG(Chr)4 | 6886332                 | GGCAAACCTGGCCAGTACTATTTCTATCATATCTG AACTTTTTGGTCTTAAATATTACTCAACATTGTACA ATGTTGGGTTAATAGCAAATCCTATTGGG | T         | A       | AACTCCTCCCTGGATTCTCTTTATCCCTAAT GTTCCATTTGCCTTATGGCTTCTTATCATAAA GATGACCAGCAACCTCACATTTAACAAGTATG       |                            | NA                          | NA  |

| Marker IDs   | Genetic positions (cM) | Chromosomes      | Physical positions (bp) | Flanking sequences/Forward primers                                                                           | ICC 12968 | ICC4958 | Flanking sequences/Reverse primers                                                                                                                                                                                                                                                                     | Annealing temperature (0C) | Amplified Product size (bp) |    |
|--------------|------------------------|------------------|-------------------------|--------------------------------------------------------------------------------------------------------------|-----------|---------|--------------------------------------------------------------------------------------------------------------------------------------------------------------------------------------------------------------------------------------------------------------------------------------------------------|----------------------------|-----------------------------|----|
| Ca-II-SNP743 | 264.99                 | Ca-desi-LG(Chr)4 | 7022171                 | TAAAAGTTGAACCTTTTAGTTCCTCATTGTAAAAG<br>TTACTTTTTAGTTTCTCTATTAACATAATTATTAGAT<br>TTTTTTTAGTCTCAACTATTTTTATG   | A         | G       | ATAATAATAAAAATTAATTACAACAATAATAACA<br>TAATAAGTATTTTTATCCAACCTACAAGTGCAAT<br>TTAAGTACCATGTCATTAATGAGAATGTTACA                                                                                                                                                                                           |                            | NA                          | NA |
| Ca-II-SNP744 | 266.14                 | Ca-desi-LG(Chr)4 | 7062809                 | CTTTCACCTTATCCTTTTACCTTCTTATGAGGCTC<br>ATGTCTTAGTTTCATTTTTGTCCACTTCTTTTTCT<br>TTTTATCAATCTCTGTTAGTGCAAAAAG   | T         | G       | TAATTTCTACACTTAACAAATACAGTTAGTGGAT<br>AGTTGTTCTTTATTTGTTTGTTTTTGTTATCATC<br>AAAACATCAATTAGAGGATTGTAGCTAAAACC                                                                                                                                                                                           |                            | NA                          | NA |
| Ca-II-SNP745 | 270.74                 | Ca-desi-LG(Chr)4 | 7112402                 | TTCGAAATGCCTGGAAAATGTTGGAAGTTGAGGG<br>AAAGTTTCGAAGGTTCTGGGAAAGTTTCGAAACAT<br>ACTTTCGAAAGTTTGGATCTGGGAAAGTTTC | A         | G       | ATATAAATAATATTTCCCATTTAGTTTCAAAAA<br>TTATAAATAATATATAAAAGTATGTTTCGAAAT<br>TTGGGTTTATCCAACCTTTCGAATGTATGTTT                                                                                                                                                                                             |                            | NA                          | NA |
| Ca-II-SNP746 | 271.89                 | Ca-desi-LG(Chr)4 | 7235461                 | TTTAGTTTGACCGAATTTGGTTCAAACCGTCTGA<br>TATGATTTAGTCAAATTTGGTTCGAATCATCTAGT<br>CCAATTTGGTTTGATTAGTCTGATTCCAT   | G         | T       | AAACGTTCCAGGGCTTGAATAGCACGCTCAATA<br>GCCATCATAGTCACTTCCATTTTCTCCTCTGAA<br>GTAGTTTCCCGGCCTCCATTTCCATGCAAACGC<br>TTGTAATTTCAAACCCCTACATCATCCACCTTAA<br>CTCACGGTATTGCCGATCTAATTGTGAAATTG<br>AATACCCCTTTGAATGATCTGGTAGAAACATTG<br>AAAGGACTTCGT                                                             |                            | NA                          | NA |
| Ca-II-SNP747 | 273.04                 | Ca-desi-LG(Chr)4 | 7268764                 | AACTGATTGAGGACCTCTCAGAGACTTAGTGAAT<br>ACATCTGCCAATTGATCATTGGAATTAACAAAAC<br>AGTGGTATGTCACCTGATTGATCTTTTT     | A         | C       | TGACATTAATATGTGATAATCAAGCAGCATTGC<br>ACATTGCCTCTAATCCAGTTTTTCATGAGAGGA<br>CCAAGCATATTGAGATAGATTGTCACTTTGTAA<br>G                                                                                                                                                                                       |                            | NA                          | NA |
| Ca-II-SNP748 | 274.19                 | Ca-desi-LG(Chr)4 | 7344673                 | TTTTTTTCTAATTTAATCTTCTAGTGTATGAG<br>TCTGATGAAATCACGGTAGCACTGTGAATTTGTTG<br>AAGTTTCAAAGTGTAGCTTTTGCCAGAAT     | C         | T       | TACGTACCTACATGCATATACATTGAATAAA<br>GATAATGCTACATGGTACATGTTTGGATTAACA<br>GCGAGAGTTTTGCTGAATCACAGTTTGCCACCA<br>T                                                                                                                                                                                         |                            | NA                          | NA |
| Ca-II-SNP749 | 275.34                 | Ca-desi-LG(Chr)4 | 7395192                 | TTTTTTTGTGATTCGTTGTCTGAGCGCGACGTTT<br>TTATTTTTTATTTTTTGTCTAGTGCCATGCTTT<br>TGGGTTTAGATTGACGAAGTAGTTTTAGT     | G         | T       | TTCCATTGTTATATAATTTATTTGGCTTCTAT<br>AGTTATATCTAAAGTAGTATATATCTTAAATTTG<br>AAACCCAAAAAAGTATAAATGTTGTGATTCTGG<br>TTGCATACATATCTCAGTATACTGATTGTCAATA<br>TACAAGACAGTCATCTAACCCCTGTAACCAGCT<br>TGGCCCTCATGATAACTCGACTATCGCTGGAC<br>GTTTTTTGGAACCTAGGATTTCTCTCTGTTTTTC<br>ATCACCCTCATCTGTACCAGAACTACCTTTTTTC |                            | NA                          | NA |
| Ca-II-SNP750 | 276.49                 | Ca-desi-LG(Chr)4 | 7578257                 | AAGCATTTGTAACCTCATGGAGGGGCGAGATTTG<br>ATTATTTTTTTGTGAGGCTTTGCTCTAGAGTT<br>CTTGAAAGAATTCATCTTGAACCTATCAAGG    | C         | T       | AAAGGAAACTCAATATTTATTCAACAACGAAA<br>CAAAAAACAAAATGGCCCAATCTAGGGATT<br>GATAAGCCAAAAAGAACGCCACAAAAGATTAACA                                                                                                                                                                                               |                            | NA                          | NA |

| Marker IDs   | Genetic positions (cM) | Chromosomes      | Physical positions (bp) | Flanking sequences/Forward primers                                                                            | ICC 12968 | ICC4958 | Flanking sequences/Reverse primers                                                                                                                                                                                                                                                                                                                                                                                                                                                                                                                                                                          | Annealing temperature (0C) | Amplified Product size (bp) |    |
|--------------|------------------------|------------------|-------------------------|---------------------------------------------------------------------------------------------------------------|-----------|---------|-------------------------------------------------------------------------------------------------------------------------------------------------------------------------------------------------------------------------------------------------------------------------------------------------------------------------------------------------------------------------------------------------------------------------------------------------------------------------------------------------------------------------------------------------------------------------------------------------------------|----------------------------|-----------------------------|----|
| Ca-II-SNP751 | 277.64                 | Ca-desi-LG(Chr)4 | 7632834                 | AATTTCTCAAACCTTATGTTCTAAAGATGCATTTCA<br>CCAATAAGTATGTGAGTGCCTCAAGTGATCCACACC<br>CCAAGTCTACTGTAGCCTCTTCTGCAAG  | C         | T       | CCTTAAGTAAAAGGCGTTCTGCAAGTAGCTTCC<br>CAATCTTTGAAGCTGCAGCTACATCCCGAGTAG<br>TTTCCAAGTTTGATCTCAAGGCTTTCTCTTGTA<br>A                                                                                                                                                                                                                                                                                                                                                                                                                                                                                            |                            | NA                          | NA |
| Ca-II-SNP752 | 278.79                 | Ca-desi-LG(Chr)4 | 7672275                 | CCGAAGTAGGAGAACTAGAGTTCGGATGACTCTA<br>AACCATCGGAGAAAATCTCATAGTTTGTCCGG<br>GAGCCTTGTGGAGATGTTGAGTCTGAATAGT     | T         | G       | GTGAGCATTGTCAACAGCTTGACACACTATTG<br>ATCGTTGTTGGAAGTTGCATGGTAAGCCTTCGC<br>CTTCAATAAATGCAACTCTGCTTGATCCTTCTG<br>C                                                                                                                                                                                                                                                                                                                                                                                                                                                                                             |                            | NA                          | NA |
| Ca-II-SNP753 | 279.94                 | Ca-desi-LG(Chr)4 | 7834534                 | TTGATCTCTAGTATCTATCACTGTTTATGAACCAA<br>CAATACTATCATTTTCACTCAATCTCATTTTCTCC<br>CTTGATCTGTCTTCTCTGAATTTCTATG    | A         | C       | AGCCATACGCGATTTTCACTCAAATTTGTAAGT<br>TTCCGACCTATAACGATCTTTAAAGTGAACAT<br>GACTATTAGGATCATATCACATATACAATTAGAT                                                                                                                                                                                                                                                                                                                                                                                                                                                                                                 |                            | NA                          | NA |
| Ca-II-SNP754 | 281.09                 | Ca-desi-LG(Chr)4 | 7965918                 | TATACAATATGATTTGAATCTGTTATGAGGTTATT<br>GAATTTGGATTATTTTGTCTATAAATAAAAAGC<br>AGAAATTGATTTTGTGTGTGTGTTCTT       | A         | G       | AGGACACCACAATCAAACAAAAGTTTACATCTA<br>CAAATTTTACCTGAACAACATCCACATAAAAAAT<br>TGTTCTCCAGTCATTGCCAACACTTAATGCAT                                                                                                                                                                                                                                                                                                                                                                                                                                                                                                 |                            | NA                          | NA |
| Ca-II-SNP755 | 282.24                 | Ca-desi-LG(Chr)4 | 8112704                 | TTGCTTCATATATTTGAATGAAAAGTGTGACTTTAT<br>CTTTATTTGCTCTTTGACACACTCAAATGAAT<br>CTTGGCACAAAATTATACTTTGTCATATT     | A         | C       | GAGAGAGCGGCGCGATTTTCTGCGACGGCG<br>GTGCATCGGAATCTGTGGCATCGACGTAACCG<br>ACGGTGTAGAGTTGATCTAAAATTTGGTGCACA<br>ATTGAGTGTGTTGTCGATTTCTCCATGCTCTCT<br>CTCTGCTGTGATTTAGCAAAGCAGGACTCTCT                                                                                                                                                                                                                                                                                                                                                                                                                            |                            | NA                          | NA |
| Ca-II-SSR201 | 283.39                 | Ca-desi-LG(Chr)4 | 8205928                 | TTTAGGCCGCGACATTTATT                                                                                          | (AT)7     | (AT)6   | TCACCGATAAATATAAGTAAAACACGA                                                                                                                                                                                                                                                                                                                                                                                                                                                                                                                                                                                 |                            | 59.59                       | NA |
| Ca-II-SNP756 | 285.69                 | Ca-desi-LG(Chr)4 | 8290399                 | CTCCATTCAAACGAGTTTTAGATATGCCAAAATTT<br>ACAAAATTTCTGGTGCTTTATTGTCTGAGTTGGCTA<br>GTAGGTGGGATGGACGTAGTGGGGGATTTA | T         | A       | GAAAAATGTTACACATTTGAATTTCAAGTGAACAT<br>TACTCTATTATGTGGAAGACTTGAATGGTTTTT<br>GTAGAGATCCTTGGCATAAATGAAGGCTACTC<br>TTAGGCGTGATTATTGCAATAGTCTTTGGCAAA<br>CTGCTGCTTCTGTTGCTGGAATTTACTACTTG<br>TTCTCTTTTACTTCAATCAGTTTGTCTGTCTT<br>GCAAGTTGTACAGCAATATAATGACTCCTCAGA<br>TACTTACTTACTTCAATAATTTCTTCACTTCATAA<br>AAGGGCTGTTGAGGTAGAATGCAATTTGTTGCC<br>ATTGTAGGCTTTTCAATTTGGATCTTCTTGAACA<br>CATAACAAGCCAATGTGGACGTACTTGATTACT<br>TCTTCATGGGAATAAGTTCTTCTATATTAGGA<br>TCCAATAGTTCAAGAGGCGTTTGTCTGCCCAT<br>TTTATCCAAGCGTATCTTCGGATGTCATCAACG<br>CACTCTGAGTCAGTAGAACAACCTTTCTCTTT<br>CCACTCATAATCTCTACAAACATCATTTCAAAA |                            | NA                          | NA |
| Ca-II-SNP757 | 289.01                 | Ca-desi-LG(Chr)4 | 9740035                 | GGATGAGGACGGGTTATAATTATCGTGAGCTTGG<br>GCATTTTGGATGACTAGGGGTATCCGGATGAGTG<br>TTGATGGTGACAGTAATGAACCTTACTCAGCGT | C         | T       |                                                                                                                                                                                                                                                                                                                                                                                                                                                                                                                                                                                                             |                            | NA                          | NA |

| Marker IDs   | Genetic positions (cM) | Chromosomes               | Physical positions (bp) | Flanking sequences/Forward primers                                                                           | ICC 12968 | ICC4958 | Flanking sequences/Reverse primers                                                                                                                                                                                                                                                                                                                                                                                                                                                                                  | Annealing temperature (0C) | Amplified Product size (bp) |     |
|--------------|------------------------|---------------------------|-------------------------|--------------------------------------------------------------------------------------------------------------|-----------|---------|---------------------------------------------------------------------------------------------------------------------------------------------------------------------------------------------------------------------------------------------------------------------------------------------------------------------------------------------------------------------------------------------------------------------------------------------------------------------------------------------------------------------|----------------------------|-----------------------------|-----|
| Ca-II-SSR202 | 290.03                 | Ca- <i>desi</i> -LG(Chr)4 | 10865571                | TGACGATGGAATCATTAGTGG                                                                                        | (TA)15    | (TA)14  | ATTTCTCTTCATTATAATCCATT                                                                                                                                                                                                                                                                                                                                                                                                                                                                                             |                            | 59.82                       | 226 |
| Ca-II-SSR203 | 291.05                 | Ca- <i>desi</i> -LG(Chr)4 | 11096813                | TGTCACACATCAATGCTCCA                                                                                         | (TTA)18   | (TTA)19 | TCAGCATCAACCATCCTTCT                                                                                                                                                                                                                                                                                                                                                                                                                                                                                                |                            | 59.66                       | NA  |
| Ca-II-SNP758 | 293.09                 | Ca- <i>desi</i> -LG(Chr)4 | 11420245                | GTTTATGTCCAAACTCGATATGGTCATTAGGAATT<br>AGTCAAGTTGATTTTCAAGTACTCGAAGAGGTACA<br>ATAGATCTTGGTATCATATTTGATTGCGGT | C         | T       | AGCATACACAGGTTAGCTGCAAATTGTTACAAC<br>CACACAGTAGATGACTAGCGCTATCATCTTTGT<br>CTGCACAGCAAGTTACCTGCTATATGCATTAAT<br>TCGATCCAAGATGATTATGACATGAGAACTGCT<br>CACAATTGTCATCTGGTGGAGGCTTGAAAACCT<br>CAGAAAACAAGTGCACCGCATCAA                                                                                                                                                                                                                                                                                                   |                            | NA                          | NA  |
| Ca-II-SNP759 | 294.11                 | Ca- <i>desi</i> -LG(Chr)4 | 11444487                | CCTGGGGCGGTTTTAATCAACCGCGTCGTCGTT<br>TAGGGCATAAACGTGTTTTATTTTCCAGATTTTG<br>TAAGTTCATTCCCTACTCTCTTTTCGTTA     | A         | G       | TCTGGTGAGGCAACATAGCAATTGTGTTATTGA<br>ACAAAAGGCGTGGTATGTTCTTACTAATGTGAA<br>ACAAAAGGGACCGTAATCCCTGGGAAGACA<br>GAAAACTAACATAGTGATGAAATTGAAGCTGG<br>AAATGTCTCTGTAAAACACTAGCAGGCAGCTG<br>GACAATGTCATTCTCTCAAAATAAATGAAACA<br>CAGTTATATTGCTAGTAGTTGCTGACTTCTATTT<br>CCATCTCTTATATATGCTCACTTTTAA<br>CAAGGAACACAAAAACATTACAAAAGGCATTTGT<br>GATTGTGTGAGTACAATAGTTAAAGAAGAAGGA<br>GCTCATGCTCTATTTAAGGGTATTGGGCCAAGA<br>GTGTGTGGATAGGAATAGGTGGTTCAATATTT<br>TTTGGTGTCTTGAGAAGACAAGAAAATTCTT<br>GCTCAGAGGCAACCCCAACTGATGCTCAGAA |                            | NA                          | NA  |
| Ca-II-SNP760 | 295.13                 | Ca- <i>desi</i> -LG(Chr)4 | 11568614                | AATTGAGTCATTGGCCAATACTATTTTATATGTTA<br>TTATCTTTTATCCATCTTTTGTGTTGAATTGAAA<br>GACTTGAAGTCTATATCTGATAATAAT     | T         | C       | GAGGAGTGTATATGCTCACTTTTAA<br>CAAGGAACACAAAAACATTACAAAAGGCATTTGT<br>GATTGTGTGAGTACAATAGTTAAAGAAGAAGGA<br>GCTCATGCTCTATTTAAGGGTATTGGGCCAAGA<br>GTGTGTGGATAGGAATAGGTGGTTCAATATTT<br>TTTGGTGTCTTGAGAAGACAAGAAAATTCTT<br>GCTCAGAGGCAACCCCAACTGATGCTCAGAA                                                                                                                                                                                                                                                                 |                            | NA                          | 127 |
| Ca-II-SNP761 | 296.15                 | Ca- <i>desi</i> -LG(Chr)4 | 11777085                | GAGCTGCCTGAAACCAGTTCATCACAACTATTGTG<br>AGGGCCAAGCCAAAAGTGATCCTAAAAATGCACT<br>CTTGAATATTGGGGCTGTTTTCTCTAGA    | T         | G       | GAGGGTGCAGATGAAGCAGCTGAGCCTCCCCT<br>TGATGATACTGATTCTGCAATGGCACATCATAA<br>CAAAAGTTTAGCTGTAAGCCAATGGACACAAC<br>TTACAATTAGCTATCTGTAGAATCTTGAGAAG<br>CTGTTACAAATCC                                                                                                                                                                                                                                                                                                                                                      |                            | NA                          | 114 |
| Ca-II-SNP762 | 297.17                 | Ca- <i>desi</i> -LG(Chr)4 | 12182021                | AATCGCTCGTAGGAAAATTTACCACGGACAA<br>GCTGTGGGACACACTTACCTAGGATTGTCCGTG<br>GGTAATATGACCCACTGAGTATCTGTGGGTAA     | T         | C       | GGCACAGTTGTTTTATTATGATGGGCAGATGAAT<br>GATTCGCGGCTTAATGTTGGATTGGCTTGCACT<br>GCTGCTTTAGCTGGTGCCTCAGTCTGAACCA<br>TGCAAGAGTGGTATCCTTACTGAAGGATGATG<br>CTGGAAAACGGATAATTGGAGCACGAATTCGA<br>GACAATTTAACTGGTGAGGAGTTTGA                                                                                                                                                                                                                                                                                                    |                            | NA                          | NA  |
| Ca-II-SSR204 | 298.19                 | Ca- <i>desi</i> -LG(Chr)4 | 12587450                | TCACAAGAGACTCCCTGCATT                                                                                        | (TAAT)6   | (TAAT)5 | TCAGAAGTTTCAGAACCTTGTCAAT                                                                                                                                                                                                                                                                                                                                                                                                                                                                                           |                            | 59.86                       | NA  |

| Marker IDs   | Genetic positions (cM) | Chromosomes               | Physical positions (bp) | Flanking sequences/Forward primers                                                                          | ICC 12968 | ICC4958 | Flanking sequences/Reverse primers                                                                                                                                                                                                                                                                                     | Annealing temperature (0C) | Amplified Product size (bp) |    |
|--------------|------------------------|---------------------------|-------------------------|-------------------------------------------------------------------------------------------------------------|-----------|---------|------------------------------------------------------------------------------------------------------------------------------------------------------------------------------------------------------------------------------------------------------------------------------------------------------------------------|----------------------------|-----------------------------|----|
| Ca-II-SSR205 | 300.23                 | Ca- <i>desi</i> -LG(Chr)4 | 12811509                | AGCCCTTTAAGCAGCAACAA                                                                                        | (TAT)6    | (TAT)5  | GGATGTTGGGATCAAAGTGAA                                                                                                                                                                                                                                                                                                  |                            | 60.02                       | NA |
| Ca-II-SNP763 | 301.25                 | Ca- <i>desi</i> -LG(Chr)4 | 12970386                | CCTTATCTCCTTTTTATTTTTACCTGCACAACACT<br>AATTATTTGTGAAGTTTTATTGTTACATTCTAAC<br>AAAGAACATTATGTCCTTTATTAATCAA   | T         | C       | CAATGTGTCAAATTCATCATCATCTGTACCTT<br>AAGTCCAAACACCAAGGCTAGTTTTGACTCC<br>ACAATCAACTGTCTTCTAAGAGACATACTAAT<br>TTCATGCCATTTTTTTACACTCAATCCATTTC<br>CTATCAAATCCCATATAAACCATTTTTTACCTA<br>TT                                                                                                                                 |                            | NA                          | NA |
| Ca-II-SSR206 | 302.27                 | Ca- <i>desi</i> -LG(Chr)4 | 16332808                | AAAAATTATAAAAACAGGGCATAGAT                                                                                  | (AT)10    | (AT)12  | ATAATATTTACCAAGGTAGGTTTTT                                                                                                                                                                                                                                                                                              |                            | 57.17                       | NA |
| Ca-II-SNP764 | 304.31                 | Ca- <i>desi</i> -LG(Chr)4 | 16481864                | GGAACAAGCTGAGTTAAGTCAGCTACAATCAACT<br>GCAGTTGCTTCACTACCTAACTCTAATGGTTCACG<br>GATTCCTCCGTGAAGTCTATTATGCCCATC | T         | C       | CCTTGGAGGAGAGATTTGCCTCCTAGTCTTAA<br>TAAAAAAGTTATTTCTTAGGAATCCAATCCTGG<br>GTTCTAATAATTGGTATGACTCGGATTTTCGA<br>GGAGTGCCAGTGTTC AAGGAGACGGAAGCCGA<br>ACCAAATGGTGAAGTTGCCAACATTTACAGGGA<br>TAGACCCATTGGGCGGCTTGCAAGGGCTGAA<br>AGATTCTTTGTGAAGCATAAAACTCGTGAGTTT<br>CATAAATTCACCTCCCATTCATCACAACCCAT<br>TCCTTTCAATCTCCACAGC |                            | NA                          | NA |
| Ca-II-SSR207 | 306.35                 | Ca- <i>desi</i> -LG(Chr)4 | 18058917                | GTGCATGTACGCCACGTAAC                                                                                        | (TC)9     | (TC)8   |                                                                                                                                                                                                                                                                                                                        |                            | 60.07                       | NA |
| Ca-II-SNP765 | 308.39                 | Ca- <i>desi</i> -LG(Chr)4 | 18170443                | GACTTTGTAAGATTGCTCTATCTCCCAACAAGCC<br>ATCACTGCTTCCATTGCATGGACTCTGACATGTTG<br>TTGTAGTTGTTCTTTGAAGGAACACAGCAA | T         | G       | GACATAGGAAGGAACATAACCCAACAAAACATA<br>TGTGTGTGTCTGAGAGACAGAGGAGAGGACAA<br>CAAAATCCTTACTATCACTCGTCAGAAAGAAGC<br>ACAACCAGAAATCTTGGCTACAGATAATAATA<br>CAACCAATAAAACACAAATTACACTAGATGCCA<br>TTATTGCCATTACTCTCCTCCTCCTCCACAAG<br>GCATTCTTATCTTCCACGCAGCATGTCACAG<br>CCACTGACAAAAGCCCTGTGACCCCTCTCT                           |                            | NA                          | NA |
| Ca-II-SSR208 | 310.43                 | Ca- <i>desi</i> -LG(Chr)4 | 18680223                | GAATTATTATTCACGTATGATGTGC                                                                                   | (AT)9     | (AT)10  | TGAATGAGTTGAAGTAAATGCAGC                                                                                                                                                                                                                                                                                               |                            | 58.09                       | NA |
| Ca-II-SNP766 | 312.47                 | Ca- <i>desi</i> -LG(Chr)4 | 18833427                | ACGACATGTGTGTCGCTGTCCACCGACTTGTATC<br>AGACATCAAACAGTTTTCAATCTAGGTGTTACAT<br>AGGTTAGGACTTCCACTAATAGACTAGTCAT | C         | T       | CTGACCTCGTTCAAATCTAAGGTTTCATTTTCAT<br>CTGCTGTGATCTGGTCTGCGTCAGTACTCGT<br>CTGCTCACAGCTGTCCAAAACGACGCTCCTCT<br>CAGAAGCCGTGTGAGGTGCTCATGTCACITTA<br>CTGTCACITTCAGAT                                                                                                                                                       |                            | NA                          | NA |

| Marker IDs   | Genetic positions (cM) | Chromosomes      | Physical positions (bp) | Flanking sequences/Forward primers                                                                           | ICC 12968 | ICC4958   | Flanking sequences/Reverse primers                                                                                                                                                                                                                                                                                                                                                                                                                                                                                                                                                                                                                                                                                       | Annealing temperature (0C) | Amplified Product size (bp) |     |
|--------------|------------------------|------------------|-------------------------|--------------------------------------------------------------------------------------------------------------|-----------|-----------|--------------------------------------------------------------------------------------------------------------------------------------------------------------------------------------------------------------------------------------------------------------------------------------------------------------------------------------------------------------------------------------------------------------------------------------------------------------------------------------------------------------------------------------------------------------------------------------------------------------------------------------------------------------------------------------------------------------------------|----------------------------|-----------------------------|-----|
| Ca-II-SSR209 | 313.49                 | Ca-desi-LG(Chr)4 | 18897679                | TGGGGTGTGAATGTGAGAGA                                                                                         | (AATAA)26 | (AATAA)27 | CAACAGGAATTTGCAATCACA                                                                                                                                                                                                                                                                                                                                                                                                                                                                                                                                                                                                                                                                                                    |                            | 60.09                       | NA  |
| Ca-II-SNP767 | 315.53                 | Ca-desi-LG(Chr)4 | 21255529                | CCAAGGCTTAACAGATTGTTCTTCATGTTGGCAC<br>ATACAACACATCACATATGAATGATTGTTGTGCAT<br>CTCTCCTTTGAATCATCACTTTTCTACTC   | T         | C         | ACCTCTCAAAGAAAACTAGACATCAAACCTTA<br>AGTTAGAATAATTAATAAATAACAAATTAATCTCT<br>TAGTAAGCACTCTCAAATAACAACAAAAAATTA<br>CCCCCTTAAACAAAACCTGTAATCTTCAATTGT<br>ATTTGATCATTAAACATCAAGGTAGATCTGAATTC<br>TGTTGATGAAAATGAAAATGGATATATACACAT<br>ATTGACATACATGTGATATTTGCCTCAACTCTA<br>TCATTTACACTTTTACAAAACCTGTTAAAACCT<br>GCTTGAGTTCACAAAATCATATTTAATAATAAGT<br>TAGCCGCATCATAAATAAATAGGTGGAGTAA<br>AGCTAAAGTGGCTACAGCTTTTACTTGTAGAA<br>AGGGTGAGAATAATAGTACATGGCTTAGGAGG<br>GACTACATTACACTGTTGGTTCATTCCATTTCG<br>AGGGTCATACAAAACCCACCAGATTTCCAGG<br>ATAAAGAAAACAACTGAGAATGCAACAGTGT<br>CACTAGCCCTAAAGCATGCTCAACTCAACA<br>GTTGATGAGATCACAAAAGCAGTCGAAGAAGAT<br>CTTCGACATTTGCTCAAAATGTTTGAAAAGTTT<br>GTTGAGTGTGCAGAGAAAAGATTATATAATGG<br>T | NA                         | NA                          | NA  |
| Ca-II-SNP768 | 316.55                 | Ca-desi-LG(Chr)4 | 21675078                | GATGATGTCGCTGAGCCTGCACAGATGGAGGAG<br>GATGTCCCTGAACCTACACAGATGGAGCAGACTG<br>AGGAGCAGTATGTTGAGCCTGCACATGATGATG | G         | A         | GCTTGAGTTCACAAAATCATATTTAATAATAAGT<br>TAGCCGCATCATAAATAAATAGGTGGAGTAA<br>AGCTAAAGTGGCTACAGCTTTTACTTGTAGAA<br>AGGGTGAGAATAATAGTACATGGCTTAGGAGG<br>GACTACATTACACTGTTGGTTCATTCCATTTCG<br>AGGGTCATACAAAACCCACCAGATTTCCAGG<br>ATAAAGAAAACAACTGAGAATGCAACAGTGT<br>CACTAGCCCTAAAGCATGCTCAACTCAACA<br>GTTGATGAGATCACAAAAGCAGTCGAAGAAGAT<br>CTTCGACATTTGCTCAAAATGTTTGAAAAGTTT<br>GTTGAGTGTGCAGAGAAAAGATTATATAATGG<br>T                                                                                                                                                                                                                                                                                                            | NA                         | NA                          | NA  |
| Ca-II-SNP769 | 0.00                   | Ca-desi-LG(Chr)5 | 180                     | ATGAGTGTTAATAATTCTGTAAGCTTTTATCAGA<br>CCATCCATTACTCGCTTTTAAAGTTGTACAACTTAA<br>TATCACCGACAGTCTTGTGAATTTAGTAC  | G         | A         | GTTGATGAGATCACAAAAGCAGTCGAAGAAGAT<br>CTTCGACATTTGCTCAAAATGTTTGAAAAGTTT<br>GTTGAGTGTGCAGAGAAAAGATTATATAATGG<br>T                                                                                                                                                                                                                                                                                                                                                                                                                                                                                                                                                                                                          | NA                         | NA                          | NA  |
| Ca-II-SNP770 | 1.21                   | Ca-desi-LG(Chr)5 | 563                     | TTTTAAACAAGGACAAACGACTCTATTTGGATCCT<br>TTGCATTCTCGAAACTCAACAACTTTTCACT<br>CCATTTTCATACTCTTTTGACAATCGATTG     | C         | G         | TTGGTTTCTTTTTGAAACTTGTGATATGTTTTG<br>AAAGCTTATATTTTTGTAAGTGCATTTATATAG<br>GTCGTATAATATGGATAGGAAATGGATGTCTG                                                                                                                                                                                                                                                                                                                                                                                                                                                                                                                                                                                                               | NA                         | NA                          | NA  |
| Ca-II-SNP771 | 3.59                   | Ca-desi-LG(Chr)5 | 124382                  | CCCCAATGTTTCTCCTTACAAAGGAGCTTTCTCT<br>TTCAGTCAGAATATCAAACGGAGTTGCCCCAATG<br>GATTATATTACTCATAGGCAGTCAAACCTCTT | C         | A         | TTATCAACTCGAAGCACTCTTTGAAGCAGAGA<br>AATGAAGGTAACCTCCAAGCATCTCAATACCCT<br>CACCATTGCTGGTGTGAGGGAATCCTGACA<br>TG                                                                                                                                                                                                                                                                                                                                                                                                                                                                                                                                                                                                            | NA                         | NA                          | NA  |
| Ca-II-SNP772 | 4.78                   | Ca-desi-LG(Chr)5 | 217556                  | TCTTAACCCATTACAACGGGGTAGTTTGAAGATGA<br>TCGACAACAACCTGATATATGCTTTTGTGAAAGA<br>TGGCATTCTGAGACATCGTCATTTACATG   | T         | C         | GTTACTCTATCTACATCGGGTGGATTGTAGAAC<br>TCACCCTAATAGGCAATCCGAGAAGATTGGC<br>AACATCATCAAAGTAATCGTCATTTACCAAAT<br>G                                                                                                                                                                                                                                                                                                                                                                                                                                                                                                                                                                                                            | NA                         | NA                          | NA  |
| Ca-II-SNP773 | 5.97                   | Ca-desi-LG(Chr)5 | 264577                  | CCTCAAAAACGACATTGCAAATCCAACAACGAC<br>TTCTCAAAAACCTCACTTCCCTTCATTTGTT<br>CCCTTCTCCTCTTCCGCAACGCCACGAA         | C         | T         | AGCGTCAGAAAGCGGCGTTGTTGCTCGCGGCT<br>TCAATTTGCGGCGTGGACCGAGTTTAGCTTC<br>GGAGGTGGCAAAGATATTTGATTTCAAGGTGG<br>CTGG                                                                                                                                                                                                                                                                                                                                                                                                                                                                                                                                                                                                          | NA                         | NA                          | 115 |

| Marker IDs   | Genetic positions (cM) | Chromosomes      | Physical positions (bp) | Flanking sequences/Forward primers                                                                           | ICC 12968 | ICC4958 | Flanking sequences/Reverse primers                                                                                                                                                                                                                                                                                                                                                                             | Annealing temperature (0C) | Amplified Product size (bp) |     |
|--------------|------------------------|------------------|-------------------------|--------------------------------------------------------------------------------------------------------------|-----------|---------|----------------------------------------------------------------------------------------------------------------------------------------------------------------------------------------------------------------------------------------------------------------------------------------------------------------------------------------------------------------------------------------------------------------|----------------------------|-----------------------------|-----|
| Ca-II-SNP774 | 7.16                   | Ca-desi-LG(Chr)5 | 350477                  | TATAAGTTGGTTAATTGATTCTTATATACTACTTAA<br>TTTTTAACTTTTATAGGAGTTCCTTGATATTCTGCA<br>ATCCCCTTTCTTTGCTCTCCTCGTCTTA | T         | C       | AAATCACTAATGTTTGTATAGTGAATATAGT<br>GACAAAATGATGAGTTATTTGTTTATAATTTACC<br>ATACATAGTATTGAGAATCTTGAGAAACCAAC                                                                                                                                                                                                                                                                                                      | NA                         | NA                          | NA  |
| Ca-II-SNP775 | 8.35                   | Ca-desi-LG(Chr)5 | 408429                  | CCTAGCCTCATAGATTTCTCCTTTGAATAAAAA<br>CATAGATTTCTCCATCATATAGTGATGCCAATTC<br>AAAGTTTTATGACTTGGGATACAATGGCG     | C         | A       | GGCCTTTTATTTACTAAAGTTGTGAATACATCAT<br>ATACCACATGATGATCCACCTGGCCCGCCATAA<br>AGAAAAGCTTGCATAGTAGGATCCTTGATAG                                                                                                                                                                                                                                                                                                     | NA                         | NA                          | NA  |
| Ca-II-SSR281 | 9.54                   | Ca-desi-LG(Chr)5 | 434482                  | TCATATCACTCGATGCACGG                                                                                         | (TC)6     | (TC)7   | AAAAATGACTGAAGATATTTGTTGTG                                                                                                                                                                                                                                                                                                                                                                                     | 60.65                      | 111.00                      | NA  |
| Ca-II-SNP776 | 11.92                  | Ca-desi-LG(Chr)5 | 459827                  | TGACTTAGGAGGCCTAAGCCCAAATTTAAGAATA<br>ATCACCATTTTTACTTCTTTGAACATTTAATTTTT<br>CTGCTCTATTGATCTGTTCTTCTTCTA     | C         | T       | GAATTA AAAAATGGCAGAATTTAAAAACAAAAA<br>TTGAAAAACAATAAAAAAGTAAATAAAGAGAG<br>AAAAAAATTTACAAAAATTTGATATAGTTCCACC                                                                                                                                                                                                                                                                                                   | NA                         | NA                          | NA  |
| Ca-II-SNP777 | 13.11                  | Ca-desi-LG(Chr)5 | 494008                  | TGTTGACACTCATAGTTTCTGTATTGCTGCTGGGA<br>TGCTTGATTAACCAATTTACACATTTGTGATCATA<br>AATTATGCGGAGCATTGATATCATGAATG  | G         | A       | TGAAAGTGGTGAGGAAGGAAAACATAATAAAG<br>CATAATTAAGAATGTAACCTGACAGATCATATGC<br>AGCACATAATCAACTTTCACTGCATTTATGAAG<br>G                                                                                                                                                                                                                                                                                               | NA                         | NA                          | NA  |
| Ca-II-SNP778 | 15.49                  | Ca-desi-LG(Chr)5 | 576575                  | GTGCCTATGACTCTGAATTCAGCTTATGCACTACT<br>TCTAGCTATCACAACTGTTCTTCTCTCCAAG<br>TAACCATGTTTCCCCACACGAATGAGCAAT     | A         | T       | TAGAGGTCTTCATTTTCAGAAAAATACAAATAG<br>GAGTATCGAAGTATACACTGACTCAGATTGGGC<br>TGGATGTACATCAACAGAAAGTCAACTACTGG<br>T                                                                                                                                                                                                                                                                                                | NA                         | NA                          | NA  |
| Ca-II-SNP779 | 16.68                  | Ca-desi-LG(Chr)5 | 585987                  | AATGAAGTAAATGATTTATTTATATTTTGCTATAAC<br>AACTATATATGCATGCATATTTGCTCCGTGTTTGT<br>TATTTGGAGATGACCCTTACATTTGACAG | A         | C       | AAATCTAGTAAGCCGGATCACAATATTGTTCCA<br>TATCTTTTGGCATGCCATAAAAAACAAATGGCA<br>CTGGATGACATGGAACATATAACAATTTGGGTTG<br>GGTGACCAGGTTGTTCAATATACACACAAAAA<br>AGAACCAGATTTCTCACCCTATGGAATCTTC<br>AATCACCATTATTTGTGCAATCTGATTTTCTCTG<br>TTTAGCAGCAAGTCGGGGCCTCAGCATTCTAT<br>ATACTGACTTCTTACAACTTCACTCTCTCTC<br>GTTTACAATATGAATAATTCACACAATCAAAC<br>TAAACAAGACAAATAAATACCAAAATTAAGAACA<br>GTGAAACCAAAATAGTATTTCCAAATATATTA | NA                         | NA                          | NA  |
| Ca-II-SNP780 | 17.87                  | Ca-desi-LG(Chr)5 | 613252                  | GTTTTGGGTCCTTGGTGGTTCTTTCTGTTTTATT<br>AAGTTGGATTCAATGTGTTAACTTAGGTTTGTG<br>TTGAAGGTTTTATTTTCATTTTATATGT      | T         | G       | GTTTACAATATGAATAATTCACACAATCAAAC<br>TAAACAAGACAAATAAATACCAAAATTAAGAACA<br>GTGAAACCAAAATAGTATTTCCAAATATATTA                                                                                                                                                                                                                                                                                                     | NA                         | NA                          | 156 |



| Marker IDs   | Genetic positions (cM) | Chromosomes      | Physical positions (bp) | Flanking sequences/Forward primers                                                                           | ICC 12968 | ICC4958 | Flanking sequences/Reverse primers                                                                                 | Annealing temperature (0C) | Amplified Product size (bp) |    |
|--------------|------------------------|------------------|-------------------------|--------------------------------------------------------------------------------------------------------------|-----------|---------|--------------------------------------------------------------------------------------------------------------------|----------------------------|-----------------------------|----|
| Ca-II-SNP781 | 19.06                  | Ca-desi-LG(Chr)5 | 717330                  | ACTTTATTTACCTTTTCTTTGTTGGTATTTCATTT<br>TTTTTGTAAACATCAATTAATAGACTTATTAAGAAAG<br>TGAATTAGAGAATTGGATCACTTCATAT | G         | T       | GAACGCATGTTCAACATGTAATCTTAAGTGATT<br>TTATTTACAATTTTTGTATTTTCTACCAGAATATT<br>TTTTTAAATAGTAAAAATAAGATAATGGTC         | NA                         | NA                          | NA |
| Ca-II-SNP782 | 20.25                  | Ca-desi-LG(Chr)5 | 1367823                 | AATGAAGTAAATGATTTATTTATATTTTGCTATAAC<br>AACTATATATGCATGCATATTTGCTCCGTGTTTGT<br>TATTTGGAGATGACCCTTACATTTGACAG | A         | G       | TATCTCGGAGCCTCCAACATGCATGTTATTGTAC<br>TTTCTCGCATTTTCTCCTATTAGTTGATTGTGA<br>TATTATTCGCTCAAAATAACTATATGTGACGT        | NA                         | NA                          | NA |
| Ca-II-SNP783 | 21.44                  | Ca-desi-LG(Chr)5 | 1419904                 | CATAGTGTGAGAGAAACCCTTAGCAACAAGACG<br>TGCTTTGTAGCGCTCAATTGACTTATCTGACTTAG<br>TTTTGATCTTGATATACCCAATAGTTCCTATG | C         | T       | CTGCGATTGTTGATCCTCCTCGTTACCCCTCTC<br>GTCAACTTTGTCTGAGCCTTCTTCTATAAAGA<br>GGTTGTTCTTGATCATCTTTGGCAGCAAGCTAT<br>G    | NA                         | NA                          | NA |
| Ca-II-SNP784 | 22.63                  | Ca-desi-LG(Chr)5 | 1474370                 | ACTTGCTTTGCAATTCATGGATTCAATTCATACCTA<br>TCTAACCTCTCTCATTCTTTGTCTCCACACATTC<br>GACAGGTCAAATTCAAAACCTTAACTAA   | C         | T       | ATGAAGTAAAAGTTGAATAAAAGTCGATGCAGT<br>ACAAAACAGTGAATGGAATATAACAAAAAATTG<br>AAAGGGCTTAATTTAATGATGATAATCAAATTTG       | NA                         | NA                          | NA |
| Ca-II-SNP785 | 23.82                  | Ca-desi-LG(Chr)5 | 1492078                 | AATGTACATATCCTTGACCCTATGAGCGATAAAT<br>TCTGAAAGAATTGAACCTGATCAGTTCTTCAAGT<br>GTTTGAGTCTCTTTAGGAGACTCAACTTCT   | A         | G       | TCTGAGACTAATGTTTATAATTGGTTTCAGAAC<br>AGAAGAGCTCGTTCCAAGCGCAGGCAATTGGT<br>TTCTACAATAAATCAAACAGAGCCAGAGGCTGA<br>GA   | NA                         | NA                          | NA |
| Ca-II-SNP786 | 25.01                  | Ca-desi-LG(Chr)5 | 1523220                 | TGTTGTTATGTTTGCTCTTATATGAGTAGCCAAC<br>CATGCATTAATTGCAACTACTCTTGGTAGATAGTT<br>GTGTCGGTTATATGTTACATTGAGTCTTCA  | A         | G       | GCTAAAAGAGAAGTACTAGGAAACCACACATATA<br>CATAATGGAGCAAGGGATGTAATTATAAAGAA<br>GCTAAAAGAGAACAACAACTAACATGCGGAGAGTT<br>G | NA                         | NA                          | NA |
| Ca-II-SNP787 | 26.20                  | Ca-desi-LG(Chr)5 | 1562648                 | TTGACACGTCCGTTGAATATTTGCTTCTAATTATTC<br>TTTTATAAATGACTTTAATTTTTTTAATTGTAGCG<br>GATCAGTGCATACCAACTTAATTTTTAT  | G         | A       | CTGTTCCCTAGTTTATTTTTGGTAAAGATAGTT<br>AATAAATACTAAGTACTGATTTAGTGAGCCGGT<br>CCATTTAATCCATATTTACATATACCGGACTA         | NA                         | NA                          | NA |
| Ca-II-SNP788 | 27.39                  | Ca-desi-LG(Chr)5 | 1699761                 | AAGCATTATTCCTAATTTCCATTCAAAGAAACCA<br>TTGCTTCCAAGGAAGAAATTTGAACCATTTTCTTCG<br>TTTTCTTCTCGCATGGCTGCACCTTGATTT | T         | C       | AAACATGTAACGGTGTAGAGCATACCTTCGTC<br>CAGCTAATATTTAGCCATGTTACCATTGTTATT<br>GGTGACAAATACATCGCTTTCATCGCAAACAAT         | NA                         | NA                          | NA |

| Marker IDs   | Genetic positions (cM) | Chromosomes      | Physical positions (bp) | Flanking sequences/Forward primers                                                                           | ICC 12968 | ICC4958 | Flanking sequences/Reverse primers                                                                                                                                                                                                                                                            | Annealing temperature (0C) | Amplified Product size (bp) |    |
|--------------|------------------------|------------------|-------------------------|--------------------------------------------------------------------------------------------------------------|-----------|---------|-----------------------------------------------------------------------------------------------------------------------------------------------------------------------------------------------------------------------------------------------------------------------------------------------|----------------------------|-----------------------------|----|
| Ca-II-SNP789 | 28.58                  | Ca-desi-LG(Chr)5 | 1777675                 | TTGGTGATAGATAGGTGATTCTAGTGGTGTAGTA<br>GTTGTATTTTGTGGATTAAATATGAAACATAA<br>GTTTTTGAATTGGATCAAGAATCCCAATT      | C         | G       | CTTGAAAAATCAGATGGCAGTTGCACTCGGTG<br>GAAGGTCAGTGTACCATGCAATACACAGACAT<br>GCTTATTACCTTATTCGATTTTCGATCTTGATTT<br>TTGCAAAATGCAAGTTACTCTTGATCACAATTA<br>TGCACTACTTTAAATCGTTGCTTGGCCTACTC<br>CCGAGGGGATGTATAAGAACTGTTGTTTTAGTA<br>TTGGCCTACTC                                                       | NA                         | NA                          | NA |
| Ca-II-SNP790 | 29.77                  | Ca-desi-LG(Chr)5 | 1800042                 | ACTCAATTTTTCTGTGGTTAGTCTTTAGTCCCA<br>CTCTACCCCATCTTTTTAAATATAAATGACGC<br>GTTCAATAATTGAAAAATGTTATCATTACT      | T         | C       | CTGCGCCCTTTCTTATTATTGCATTGCACATG<br>TGGCCAGCAACCCTTTGTAAGTCTGAGCTACG<br>CAGCAAAATCAGTTACTACTCCGAATCTCTGAT<br>T                                                                                                                                                                                | NA                         | NA                          | NA |
| Ca-II-SNP791 | 30.96                  | Ca-desi-LG(Chr)5 | 1991486                 | TTTCAGGCCTTGCAAGCAGCATCAAAGCTCAGAA<br>CCCTACTTGGAGTCCCTCTGCAATCAGATCAGCA<br>ATCATGACCTCTGGTCAGGCTTTTCATTTTTA | T         | C       | AAATCAATTGACTTAAACGACCAATAATTTTTT<br>ATTTTAGAAAATCATTTTAGTATTCAAAATTACTG<br>ATATTTGGAGACTAAATTGATGATTCATTTGT                                                                                                                                                                                  | NA                         | NA                          | NA |
| Ca-II-SNP792 | 32.10                  | Ca-desi-LG(Chr)5 | 2003951                 | TTGGTGATAGATAGGTGATTCTAGTGGTGTAGTA<br>GTTGTATTTTGTGGATTAAATATGAAACATAA<br>GTTTTTGAATTGGATCAAGAATCCCAATT      | T         | C       | TGCATAAGATACCAACAAAGAAAACAACAAAA<br>ACACACCACAAAAATCCTTGACACAAAAGGAACA<br>CAAGAAAACATCATATCCACCAGTCATATTTAA<br>A                                                                                                                                                                              | NA                         | NA                          | NA |
| Ca-II-SNP793 | 33.24                  | Ca-desi-LG(Chr)5 | 2027873                 | CTTCTATTTTGTGCAGATAAATTTATATTATTTTC<br>ATAATCCCTCATGTTTTCCATGTAATAACACAT<br>TAATTCTATTTTATTAAACACTTTCTCT     | C         | T       | AATTATTTTATTTGATGTTATTAATATAATTTACT<br>ATTTTTAATTATAATTATTTACTATTATTTTT<br>TATTACTTTTTATTAGATTCGGATAAAAAAT                                                                                                                                                                                    | NA                         | NA                          | NA |
| Ca-II-SNP794 | 36.66                  | Ca-desi-LG(Chr)5 | 2423599                 | TTTGAGCTAGTGAAGAATAACCTGACCTCCAAAA<br>CCTCCTGCCCTGGCCCTGGCAAGGTACAGGGA<br>CCGGCTTTAATGGCAGCAGCTGAGTAAGCATC   | C         | G       | CGGGGCACTACTTATCCAGCCACAACCAGAA<br>ATTGAGCTGAAAAATGCAAAAACGAGCACAATA<br>ATCACCTCTACGGTTCCCTCCTTTTTTTATCCA<br>CGTGTCTCACCTCCTCATCTCAATTCACAAAT<br>AACCATCACACCGTCTTTATTCTCGACCGTCG<br>TCTCGCATTGCAATTTTGCGAAATATAAACCTC<br>TATTCATTCTTGTAAGGAATAATACTAGTATT<br>TCTTACATTTCTCAAGCAAAATCCATAATAC | NA                         | NA                          | NA |
| Ca-II-SNP795 | 37.80                  | Ca-desi-LG(Chr)5 | 2597436                 | TATTCCTTGTGTGTTGTGATCATTAAAAATGTA<br>CTACAGTTAAAGTAGGGAACATGGTGGCTTCTAAC<br>ATGGACTACCGTCCATGATACACTAGGCA    | C         | A       | GTAGAGAATGGTGACACAAGGTTGAGGATAGA<br>ATCAAAAAATATAATGTTGACAGACTATAATA<br>GAAACAATGTTCTGCTTAATCTAATGGTCAAA<br>AG                                                                                                                                                                                | NA                         | NA                          | NA |
| Ca-II-SNP796 | 38.94                  | Ca-desi-LG(Chr)5 | 2763336                 | CATGTGTTCTGCATGGTCTAGATCATATGTTTGT<br>TTTTGTTTGCATTTCTCTACCATGTAGACGAGTG<br>GGGAATATGTTTGTGATAAATTTTATGTGA   | A         | T       | ATAGCTGAAAATTTTCTGTTGACCTAAATAAAT<br>CATTAAATCCCTGTTCTGCAATTGAGCTATG<br>TTGCAATGCTACAAAGTATTCCAATAACAATTT                                                                                                                                                                                     | NA                         | NA                          | NA |

| Marker IDs   | Genetic positions (cM) | Chromosomes      | Physical positions (bp) | Flanking sequences/Forward primers                                                                          | ICC 12968 | ICC4958 | Flanking sequences/Reverse primers                                                                                                                                                                                                                                                                | Annealing temperature (0C) | Amplified Product size (bp) |    |
|--------------|------------------------|------------------|-------------------------|-------------------------------------------------------------------------------------------------------------|-----------|---------|---------------------------------------------------------------------------------------------------------------------------------------------------------------------------------------------------------------------------------------------------------------------------------------------------|----------------------------|-----------------------------|----|
| Ca-II-SNP797 | 40.08                  | Ca-desi-LG(Chr)5 | 2789253                 | GAATTTATTTGATATGGACCATTGGCCCAACCT<br>AAAAGGCACGTTGAAGGAAATGGGCTGACCCCA<br>AACCTTTTAACCATATTTTGGCCTCCCGTA    | C         | T       | CCATGGGTTGAGTATACAAATGAAATTTAAG<br>AAATTTTACGGAGAAGGGGTATAATTGTGAGA<br>TAGATGATAAATTTTTTAAACATAAAAAACAGCAGA                                                                                                                                                                                       | NA                         | NA                          | NA |
| Ca-II-SNP798 | 41.22                  | Ca-desi-LG(Chr)5 | 2958738                 | GCATTTTTCCTTCAACTACACTACCAAGCCTGC<br>TATATGGCATTGATAGTACCTCACATCACAATTGC<br>TTTGCAAAGTTGTTTGTGTCATTTCTTTG   | A         | G       | CCATGAACTTCACTCACTGCAACAAATGATAAA<br>CTCTTATCAGTCCCATATTCTGCAATGCATAT<br>TGGAATAACATTGAAATTACACAGAAGAACGC                                                                                                                                                                                         | NA                         | NA                          | NA |
| Ca-II-SNP799 | 42.36                  | Ca-desi-LG(Chr)5 | 3010287                 | CTCTATTTTGTACCTAGGATCCAAAACACCAGCAA<br>CCCTCATTCCCTCATGAACCACATCTAATATTTTT<br>CAAATTTTCCCAACATATTCTCTGCCATT | G         | C       | AATATAAAAATCAACAGAGTTAGCGTATTCGAG<br>CTACTTAAACTTAGTGATGAGTGATAACTTTTC<br>CCAAATTTCTTTTTAAATTTTTAATTGATTGGA<br>ATTATTCTTTCACAACAACACAATCCTATAGCT<br>ACTAACTCATGATGTTTGGGTGACTCCAGCTTT<br>AATTCTTGACAGGTTGTGACATTAATTAATTTA<br>AGAGTGAATTAATTTATCTCTAATAATGGA<br>CTTCAAAAAGCTCTCTCTAGCAAAAGACTACTT | NA                         | NA                          | NA |
| Ca-II-SNP800 | 43.50                  | Ca-desi-LG(Chr)5 | 3024118                 | AAATGACTATATATTTGTCTTGCCGCAATCCAA<br>GTTGCTCTTTGGTATTTTTTCAAGGCACCTAAT<br>CCCAGTGTGCTTTCTACCTGTCTCAATTT     | A         | G       | GTCCCATCGACTCAACCTTGGTTTTGGTTGGAC<br>GAAGGGACTATCATTGACTATTCACATTGTGCT<br>GAGACAAATGACTTGAAGTTGGCCAATAGAGA<br>C                                                                                                                                                                                   | NA                         | NA                          | NA |
| Ca-II-SNP801 | 44.64                  | Ca-desi-LG(Chr)5 | 3052692                 | GCATGGTTTTGAGAAATGTTAAGGAAGACGTAA<br>TTACCGAGCACCGTTGGCGATTCTGTGCATAGCG<br>ACCGTAGAGAAGAATGACGATCGGGAGCTCT  | A         | G       | CGGTACGTACCATCACTTTATTTCTCTATTTTAA<br>TTTTATCTTTTTACTTTTTCTAATTAATTAATTCA<br>ATATTTCTATTTATTCTGTATTGTATAGATTA                                                                                                                                                                                     | NA                         | NA                          | NA |
| Ca-II-SNP802 | 45.78                  | Ca-desi-LG(Chr)5 | 3134685                 | TTTGAGCTAGTGAAGAATAACCTGACCTCCAAA<br>CCTCCTGCCCTGGCCCTGGCAAGGTACAGGGA<br>CCGGCTTTAATGGCAGCAGCTGAGTAAGCATC   | A         | C       | TTTCTTTTATGCTCTTTTTCTGCTTGTAGAA<br>TGTTCTCCAGCTATTCTTCTAAGATTCTTGAG<br>GGAACACAGATCAGAATGGGCAGATACAAGTA<br>T                                                                                                                                                                                      | NA                         | NA                          | NA |
| Ca-II-SNP803 | 46.92                  | Ca-desi-LG(Chr)5 | 3153611                 | CTAATTCAGTTAAAATGGATCAATGGGATTTTT<br>CACATGTAGTTAGAGACTCAGAGCATCTCCAACG<br>GTAGCTAAAATGAGTTCTGTCAGGTGTA     | C         | T       | AAACAAATTTGATTTGGAGGCACTATATTGGCT<br>ATGTAAGTTTAGCAATTGTGATTATTTTTGCATG<br>TGCGTTTGTGGTTGGCTTAGCATTGGGGTGA<br>ATGTGAATGCTATGATGGACAGCCTTCATACGT<br>TGTTTACCGTAGATCAGTGCTTCAAATCATCT<br>TAAATCTAACGAATCAACTATACTTCTCGAA<br>ATAGTCTATTGTACTTTTGGGTGGGACAATG<br>ACTCCATCCATCC                        | NA                         | NA                          | NA |
| Ca-II-SNP804 | 48.06                  | Ca-desi-LG(Chr)5 | 3233511                 | CGAGATCTGCTCAGCCAGCCCTCTTTTGTGCT<br>CTGACTACATACAGAATCTTTGAACCATGTTGTGA<br>TCCATTCAATGCTTCCATTGCCCTTTGCATC  | G         | A       | CTTCGTTTCTCTTCAAGACAGCAATTCATGCAA<br>TTGAGCTGAAGAATCATTCTACCTTGAATGGAG<br>AAGCGACAAGGGTCATGTGGTCTGTGTTGTGAT<br>CC                                                                                                                                                                                 | NA                         | NA                          | NA |

| Marker IDs   | Genetic positions (cM) | Chromosomes      | Physical positions (bp) | Flanking sequences/Forward primers                                                                           | ICC 12968 | ICC4958 | Flanking sequences/Reverse primers                                                                                                                                                                                                                                                               | Annealing temperature (0C) | Amplified Product size (bp) |    |
|--------------|------------------------|------------------|-------------------------|--------------------------------------------------------------------------------------------------------------|-----------|---------|--------------------------------------------------------------------------------------------------------------------------------------------------------------------------------------------------------------------------------------------------------------------------------------------------|----------------------------|-----------------------------|----|
| Ca-II-SNP805 | 49.20                  | Ca-desi-LG(Chr)5 | 3310181                 | GAGGGGGACAACAGCTGGAACAATTGCTAATAC<br>CCCATAGGTTGAGGAGCAAAGGAGGAATCTGCC<br>CACGGAGGGGCTCACGTTTGATTAGCTAGTTG   | A         | G       | TCAGTAAAGAAGCGAACTATTGATTATCCTCTC<br>GTCCAGTGTGGTTGATCACCCCTCGAACTA<br>GCTACTGATCATCGCCTTGGTAAGCTATTACCT<br>CA                                                                                                                                                                                   | NA                         | NA                          | NA |
| Ca-II-SNP806 | 50.34                  | Ca-desi-LG(Chr)5 | 3319950                 | CAGGCCAGGCCAGGCTTTGAAAGGCTGAGCCT<br>GGCCTACGATTTATTTTTAGGCCTAAGCCTGGCC<br>TACGGCCTATCATAGCCTTTTTTTTCGGGCTG   | G         | A       | TGCAACTTTGAGGTGCAGCGAGAGATGTTTCG<br>GCAATTGGGATGGATTCTGACTCTACAAGATG<br>TGGACCAAATGCTATGGATGCAATTGAAGAGCT<br>TATGCAAATTTTTGTTGACCAGTGTGCCTTCAT<br>TGACTACTCAAGAGTCATAGTCTTGCTATTAT<br>AGATGTGTGGATTAATGGCATAAATTCGCTCCC<br>TGTGACAACTCTC                                                         | NA                         | NA                          | NA |
| Ca-II-SNP807 | 51.48                  | Ca-desi-LG(Chr)5 | 3364304                 | TTAGATATTGTGCAAATACACGGTTGTGCGACCTG<br>GTTGACACATACACTGTTCTTGACATACACTCTTTG<br>CTTAAACACTGTTTATTTGTGCGGTGAGA | A         | G       | AATAAAGCAACATTCAATAACCCTTAAAGGAGT<br>CAAAATTAATTTATAGAAGTTTCTATAGCTGGGC<br>TTGTGTCCCAAAGCACATTAGACATACGTTTAC<br>A                                                                                                                                                                                | NA                         | NA                          | NA |
| Ca-II-SNP808 | 52.62                  | Ca-desi-LG(Chr)5 | 4406861                 | TTTTCGGAAACGTGAGTATCGTTTAGGGTGAACG<br>GTCTTTGAGTTTTGATAATTTGTTCTAATTGTTTT<br>GTGTCGTTTACTTAATTCAGCGTTAAGAT   | G         | T       | AACTATTAACATGTTTGGTACCTTCATGATAAC<br>TTCATACACATCATCAGCAATCAAAGGTGCCTT<br>CTTCCAGATCTATGTTGAAATGATTGTACAT                                                                                                                                                                                        | NA                         | NA                          | NA |
| Ca-II-SNP809 | 53.76                  | Ca-desi-LG(Chr)5 | 4475969                 | CTCTATTTGTACCTAGGATCAAAACACAGCAA<br>CCCTCATTCTTCATGAACCACATCTAATATTTTT<br>CAAATTTCCCAACATATTCTCTGCCATT       | T         | A       | CCTAAATATTCAACTCCAATCAATATTTTCTT<br>AAAATTTGATGATCAAAATTGCAATAAATGAGT<br>GGATTAATCCTCTGATGCATTGATAAAAAA                                                                                                                                                                                          | NA                         | NA                          | NA |
| Ca-II-SNP810 | 54.90                  | Ca-desi-LG(Chr)5 | 4512060                 | TGTACAGATGCACACTGTGGAACAAGTTCAA<br>GTCTACCCCTATGATGCGAAGGGGCCATCTGGC<br>CCAAGGACACTTTGCAATGCTTGTGGGCTTTT     | C         | G       | TAAAAAGTTGAGGTCTACTTCAACAATTTATG<br>GACACTCGCATCTCTCAATTCCTCAGCTTACAC<br>AAAAACAGTGATGGATCAACAGTGGCAAGTTGA<br>GAGAAAGTTCTTGTGGTCACATTTTCATCAA<br>ACCTAGAGATAGATGCAAGTCACCTCTGCCTCA<br>ATATGTGGAGACACATCATGTTGCAGGATATCC<br>TATTCTGTCTGATCCTTACATGTTTGAAGTATCA<br>ATTCAAAGCCCTGGCACTAATTTCAACAAAA | NA                         | NA                          | NA |
| Ca-II-SNP811 | 56.04                  | Ca-desi-LG(Chr)5 | 4539668                 | TCTGTGTACTCACTGAGGCAATTAGTAGAACTGCAT<br>CCCAATGACAACTTACAGTGTATATCTGGATT<br>GGCAGTTACAACCTGTTTTTCAGCAGGAAG   | G         | A       | TTTGTAACTGATTTCTCAGAGAAATTTTTTA<br>AAAGTTTCCATGCTTTAATATATTTCTATTTACT<br>GCAGGTGACATGGAATTTAAACAGAATAAGTT                                                                                                                                                                                        | NA                         | NA                          | NA |
| Ca-II-SNP812 | 57.18                  | Ca-desi-LG(Chr)5 | 4643427                 | ATTGAATCCTCAAATTAAGTATTCATTGAAAAGG<br>TCCTTAACCTTGTATGGTTTCTCCATTGATCCC<br>GATGCATGCATCCGTATAAATACATAAGCC    | A         | G       | AGAAACCAATTACTGAACCAAAGTACATTTGCA<br>AATGCAACAGAAACAACTCTTTGGAGTATAAA<br>CTATTTTTTACAGCATCTGGCATTATTATGCAGA                                                                                                                                                                                      | NA                         | NA                          | NA |

| Marker IDs   | Genetic positions (cM) | Chromosomes               | Physical positions (bp) | Flanking sequences/Forward primers                                                                          | ICC 12968 | ICC4958 | Flanking sequences/Reverse primers                                                                                                                                                                                                                                                                   | Annealing temperature (0C) | Amplified Product size (bp) |    |
|--------------|------------------------|---------------------------|-------------------------|-------------------------------------------------------------------------------------------------------------|-----------|---------|------------------------------------------------------------------------------------------------------------------------------------------------------------------------------------------------------------------------------------------------------------------------------------------------------|----------------------------|-----------------------------|----|
| Ca-II-SNP813 | 58.32                  | Ca- <i>desi</i> -LG(Chr)5 | 4658083                 | TTGCCTTATACTGATATGCTGGAAAAATGTCATC<br>TTTTGTTTTTAAGCTTTTGGCAAGGGGCATAAATT<br>TGCGTTTTTCTTTATATTCTATCATCTTTC | T         | C       | CAACACTGAATTCATGTAAAGAAGCTTGTGTAA<br>GAAACTGTTCTTGCCTTGTGCTTTTCTATGAAA<br>ACAGTACTGGTAGTTGCTTTCATTTTATGATCAA<br>CTGGTAGCTTTTCAAAGATTTTAAAGGTAGCA<br>ATGGTGGTTATATTTTCAATATGAAGATTTCAAC<br>TGATAATGTTGAGAATGATGGAAAGAATAGTAG<br>TGGAAAAAAGAACATGCTGCTAGTTTTTCTCAT<br>ACTCATECTCACTCTTCTTCTTATACTTCTCT | NA                         | NA                          | NA |
| Ca-II-SNP814 | 59.46                  | Ca- <i>desi</i> -LG(Chr)5 | 4925461                 | GGTTTTTGTGACACATTTGTTACCCTTGCCTGGCA<br>TAAGATATTTTGAAGATGTTCTGGAACTTCTCT<br>GCTTCGTCCACTTATCCATTCAAATAAATG  | C         | T       | CAATGGTCCACAACATAAAATGGGCTGAGTGAAA<br>GTCCAAAGCACAAGAAAAACAATTTGTAGTTGA<br>TGCAAAACAACAAGTCAAAAACTGGTGTAAAG<br>T                                                                                                                                                                                     | NA                         | NA                          | NA |
| Ca-II-SNP815 | 60.60                  | Ca- <i>desi</i> -LG(Chr)5 | 5234822                 | TGTACAGATGCACACACTGTGGAACAAGTTCAAA<br>GTCTACCCTATGATGCGAAGGGGGCCATCTGGC<br>CCAAGGACACTTTGCAATGCTTGTGGGCTTTT | T         | C       | TTTTCCAATTTCAACTGCGCTAGATAGTTGAAA<br>TATGAACAGGAGGTTTCCCACCAAAAAA<br>CAGAAGGATGACAATACTTACCCTATTTGCC<br>A                                                                                                                                                                                            | NA                         | NA                          | NA |
| Ca-II-SNP816 | 61.74                  | Ca- <i>desi</i> -LG(Chr)5 | 5261100                 | CATAGTGTGAGAGAAACCCTTAGCAACAAGACG<br>TGCTTTGTAGCGCTCAATTGACTTATCTGACTTAG<br>TTTTGATCTTGTATACCAATAGTTCTTATG  | G         | A       | ACAGTATGTTGACATTTTATAGGGTTTCTTCT<br>GTTTTTCATTTTGCCTGGGAGGTAAGGCCAAAGT<br>TTTTCGTGTAAATGGTTAACGGATATCCACGTG<br>GACATCTGCTATGTAATCTTTGAATATAAATAC<br>CATGTG                                                                                                                                           | NA                         | NA                          | NA |
| Ca-II-SSR282 | 62.88                  | Ca- <i>desi</i> -LG(Chr)5 | 5265717                 | AACATGGTTCACCTTAATTATACGATTC                                                                                | (TTA)5    | (TTA)7  | AGACAAAAACGGGCTAGTTAAA                                                                                                                                                                                                                                                                               | 58.11                      | 164.00                      | NA |
| Ca-II-SNP817 | 65.16                  | Ca- <i>desi</i> -LG(Chr)5 | 5280375                 | ACTTGCTTTGCAATTCATGGATTCATTTATACCTA<br>TCTAACCCCTCTCTCAATCTTTGTCTTCCACACTTC<br>GACAGGTCAAATTCAAAACCTTAACTAA | C         | T       | CGGGTCAGGAAAAATACATACTTTCCCATTC<br>AGCTGGAGGATTCACGCTGACAAAATCGTAT<br>CAGATTTGGCATTGGGAAGACAGTTTTGAAAA<br>CCAAATACTTTGTTGTAACCGGAGAACACCAA<br>CATCCTTAT                                                                                                                                              | NA                         | NA                          | NA |
| Ca-II-SSR283 | 66.30                  | Ca- <i>desi</i> -LG(Chr)5 | 5290196                 | CTAACCCAGGATCCGGAGGA                                                                                        | (AT)8     | (AT)9   | GAGACGGGATAATAATTGAAAATGA                                                                                                                                                                                                                                                                            | 60.01                      | 164.00                      | NA |
| Ca-II-SNP818 | 67.44                  | Ca- <i>desi</i> -LG(Chr)5 | 5302276                 | GAACAGACAGCAATCTCTTTTAGGCCACCAGATCT<br>CTGTACAAATTTAGCATTTTGCATATCAAACAATG<br>CCACCTTTGTCACTGGCCGATTTTCTCCA | T         | C       | TGCTCTCTTGAATCTTCAATTCAGTTTGTG<br>CAGGAGCAAAGAGAAACAATCAACACAGATTGA<br>GCTTGAAGAGCCAGATCTATCTATCAGGAATA<br>T                                                                                                                                                                                         | NA                         | NA                          | NA |

| Marker IDs   | Genetic positions (cM) | Chromosomes      | Physical positions (bp) | Flanking sequences/Forward primers                                                                           | ICC 12968 | ICC4958 | Flanking sequences/Reverse primers                                                                                                                                                                                      | Annealing temperature (0C) | Amplified Product size (bp) |    |
|--------------|------------------------|------------------|-------------------------|--------------------------------------------------------------------------------------------------------------|-----------|---------|-------------------------------------------------------------------------------------------------------------------------------------------------------------------------------------------------------------------------|----------------------------|-----------------------------|----|
| Ca-II-SNP819 | 69.72                  | Ca-desi-LG(Chr)5 | 5312055                 | ATTTGCAAAATTGCCCTCCAGTCTTTATCCTTACG<br>GTAAGTATGTTATAAGGATGACATCTATTGTTTAT<br>CTCCATATCTAGTTTAAGTACGAGGGTCCA | T         | G       | GGGAAAACAAAACCCCTAGAAAGGGAAAGGGA<br>AAGGGGAATTGATATTTGAAAGCGAGGTGATC<br>GGAATTTGATTCTTCAGATCGGATCCGTGAGAT<br>GGTCCGGTATCGAGGAGAGTGTGTTGTTAGAG<br>GGAGAAATCATCGTCTGCTACGCGGGTACAGC<br>TTTGGGTTTGGAAACGTGCTGCGACTCAA<br>G | NA                         | NA                          | NA |
| Ca-II-SNP820 | 72.00                  | Ca-desi-LG(Chr)5 | 5337897                 | GATTGACTATTAAGTTGTGACCTTTAGATTTGGAT<br>TAGATGCATTCAAATACAAATTTGAATTCCTACA<br>GCCGACTTTATGGTGCAGCTGGCTGTAGA   | C         | T       | TTTTGAAGAACAATACTCTACATCCGATTTT<br>ATGGTGCAGCCAGTTGTAGAATGTTAGATTAGG<br>ACAGAGAGAAACTTTATCTCTTAATCTAATG                                                                                                                 | NA                         | NA                          | NA |
| Ca-II-SNP821 | 74.28                  | Ca-desi-LG(Chr)5 | 5409164                 | ATCCATAATTATTTTTATGAAGTTACAAGTCATAC<br>TGTAAGACCCATAATTTTAAAGTACCATTTTTGT<br>TTTTTGGTATATTTTGGATTTGGCTCG     | A         | G       | TTAAATTCATTTATTTATCGACGAGAAATCTA<br>ATTGGCATCGAAATATCTTTTTGATTATAAACT<br>CCAAAATATTAATAACTTTGGCTTAAAAGCCT                                                                                                               | NA                         | NA                          | NA |
| Ca-II-SNP822 | 75.42                  | Ca-desi-LG(Chr)5 | 5425955                 | GGCTAGGGTTATGGGTCGTGACTCCACAGCCTT<br>TTTAAAATAGATTTACAGTGATCTTTTTCTTAA<br>GCAGAAGATTGAATGTTCTTGAACAATCAA     | A         | G       | TCAAGGTTTTGAAATACACTTTTACATTTGTTA<br>GACGATTTCCGGAATTTCAATTCACAAACTTGT<br>CTGGTTTGAATTTGGGATATCCATTTTCTCATT                                                                                                             | NA                         | NA                          | NA |
| Ca-II-SSR284 | 76.56                  | Ca-desi-LG(Chr)5 | 5468760                 | CCGGAACCGAGTCTCAAAT                                                                                          | (TG)10    | (TG)9   | AAAAGCAGCATGGTCAGTTG                                                                                                                                                                                                    | 60.06                      | 171.00                      | NA |
| Ca-II-SNP823 | 77.70                  | Ca-desi-LG(Chr)5 | 5481759                 | GAGCAACGTCGCCTTGTTCATCTTCCAGAATG<br>TTGTGATCAAAAGGCAACATCTCGGAGCAAGTTGT<br>AGTCTTTAGAACGAGTGAACCTTGAGCTTCA   | G         | A       | TTAAAAATAAAAGTAATGAATGTAATCATAT<br>ATATATATATAGCATGCCCTTGAAGCGCCTACT<br>ATAGTAATCTGAAGTTTCTATTTGAGTTGCTT                                                                                                                | NA                         | NA                          | NA |
| Ca-II-SNP824 | 81.12                  | Ca-desi-LG(Chr)5 | 5611691                 | ATTTGCAAAATTGCCCTCCAGTCTTTATCCTTACG<br>GTAAGTATGTTATAAGGATGACATCTATTGTTTAT<br>CTCCATATCTAGTTTAAGTACGAGGGTCCA | A         | G       | AAATAGGTGATGTAATTTGACATGAGTGACACAC<br>TGGTCAAAGTGGTTCGAAAAGAGAAAACAAATA<br>ACAGCAATCATCAAACCTTAATAAAATAGAAA                                                                                                             | NA                         | NA                          | NA |
| Ca-II-SNP825 | 82.26                  | Ca-desi-LG(Chr)5 | 5650676                 | TTGATTATTTCTTACTCGAATTCATGTTTGGCAAG<br>TGCAGCTGCACGGATTGAAGTATATGAGTGGGTG<br>GAATTTCTATTGACTCTACTGGGATGAGAA  | G         | A       | ATACCAGTACCTAGAAAAATGATTGCAGTAAA<br>ATCCAATGACTGGGACACAATTCAACCTATAAA<br>TAAATTACTACCCCGCTAATCAGTTATTCTCAA                                                                                                              | NA                         | NA                          | NA |

| Marker IDs   | Genetic positions (cM) | Chromosomes      | Physical positions (bp) | Flanking sequences/Forward primers                                                                   | ICC 12968 | ICC4958 | Flanking sequences/Reverse primers                                                                                                                                                                                                                                                                                                                                      | Annealing temperature (0C) | Amplified Product size (bp) |    |
|--------------|------------------------|------------------|-------------------------|------------------------------------------------------------------------------------------------------|-----------|---------|-------------------------------------------------------------------------------------------------------------------------------------------------------------------------------------------------------------------------------------------------------------------------------------------------------------------------------------------------------------------------|----------------------------|-----------------------------|----|
| Ca-II-SNP826 | 83.40                  | Ca-desi-LG(Chr)5 | 5686299                 | CAGGCCAGGCCAGGCTTTGAAAGGCCTGAGCCTGGCCTACGATTTATTTTTAGGCCTAAGCCTGGCCTACGGCCTATCATAGGCTTTTTTTTCGGCCTG  | A         | G       | TTAGGGTTTTAAGGATGTTTGCTTCATATTTTTAAAAATTATTTAAGTAGGCTTTAAATAGGCTTCCAGGCCAGGCCAGGCTTTAAAAAGGCCAGG                                                                                                                                                                                                                                                                        | NA                         | NA                          | NA |
| Ca-II-SNP827 | 84.54                  | Ca-desi-LG(Chr)5 | 5973615                 | CACCTTCTGGGAGTTGGGGATTGCAGCTAGAATAGTCCGAAGTCCAGCCACAGCATTATACCGAAAACGGGCTTCTTCAAGAGCGCCACCAGCACCG    | C         | T       | ACTTCTCCTTCCGCTGCTACCTCTCCCAACGCTCCTTCTCAACGGAGACGCCAATTCTGATAGCTCCAGCCAACACGCCGACGGCGCTGCTCCCGGTG                                                                                                                                                                                                                                                                      | NA                         | NA                          | NA |
| Ca-II-SNP828 | 85.68                  | Ca-desi-LG(Chr)5 | 5992600                 | CATATCTTTTCTTCTCTATAATTTTTTCTCTCTATTTCTCTCTATTTGTATCAAGGAACCCTCCATGATACACATGTTTTGAAATTTAGTTCT        | T         | C       | GTTAATGCATGATTGCATAAAGCACTTGTGGAATTTGGGTTGGAGCATGTTGCAATAATTTGAACAAGTAGAAGATGAAGATGGATATGAGTATACGAG                                                                                                                                                                                                                                                                     | NA                         | NA                          | NA |
| Ca-II-SNP829 | 86.82                  | Ca-desi-LG(Chr)5 | 6134976                 | TCGAGGTTAAGGTTCTACATTTCACTGAGGCACACACCTTGGTGCTTTTGACATGCTTTTAGTGCCCCTTATTGATAACTGTAATTAATAAATCCCGTAG | T         | A       | TAGCTTTGGATCCTCATTGAACAAAACAGGGGACGTTTTGGCACATATGATTGAGGATCTTCCCTGAAGCAATGTTCTTTATGGATATCGGATAGATGACCTCAAGACTGGGGTAAGGGGCATCGATTTGACAGAAGCATTGTGCTTGTGATCCTTATGCAAACTTATTGAAGGTCGAAGACATTTGGGGATATTAGCATGAAGTTGTCTAAGTTCTAGGCACATATCATTTCACAGCTTCCCTTTTCACTCCGCAATGCGAGCATCATTGACAGCCTCAAGTATGTCCTGACTGATTGTACTAGACCCGACATTGCCTTCGTCGTGGGATTGTTGTGCAAGTTTTACTAGTAGACCTA | NA                         | NA                          | NA |
| Ca-II-SNP830 | 87.96                  | Ca-desi-LG(Chr)5 | 6333200                 | CCCTTCAAGGACGACGTGAAATCTTTGATACTATAATTCGAGACTCATTGTCTTTAAGGTATCTCGTGACTTTTCGATAGTGTGCAATGCTCCATA     | C         | A       | CTCACCAGACTCCACCGCATTAGCGTCCAGCATCGCCGCTCTCCCTCCACAGACATTGCCAAATTGCACAGAATCAGCAAAACCTACTCGCCATTG                                                                                                                                                                                                                                                                        | NA                         | NA                          | NA |
| Ca-II-SNP831 | 89.10                  | Ca-desi-LG(Chr)5 | 6509887                 | GGCGCTTGCACTCTATCATTAACTTTGGTTCAGAGTAACCGAGTCAAGCTTGTGAAACTTGGGATGGTACCCACGCTATTTTCGATGGTGAACGCGCG   | G         | A       | CTCACCAGACTCCACCGCATTAGCGTCCAGCATCGCCGCTCTCCCTCCACAGACATTGCCAAATTGCACAGAATCAGCAAAACCTACTCGCCATTG                                                                                                                                                                                                                                                                        | NA                         | NA                          | NA |
| Ca-II-SNP832 | 90.24                  | Ca-desi-LG(Chr)5 | 6543566                 | TTAGTTCCAAGTGGAGAAAATCTTGGGATGGTTTTAGTTCCAAGTGAAGTGTACTTTTGTGGTGGAGTAGATTGTCGGTAAGACAATGGAAGCGGAAG   | C         | T       | CCCAATATATAGCCTTGACCTTCTTTATTCTCCACACTAAAGGATGTGAGACTTGCAATCAACCACAACATCTCCACCTTGATTGTAAGAGTTCCA                                                                                                                                                                                                                                                                        | NA                         | NA                          | NA |
| Ca-II-SNP833 | 91.38                  | Ca-desi-LG(Chr)5 | 6596225                 | CTAATTCAGTTAAAATGGATCAATTGGGATTTTTCCACATGTAGTTAGAGACTCAGACATCTCCAACGGTAGCTAAAATGAGTTCGTCGGTCAGGTGTA  | A         | G       | AAGATAACCATATCAAAGTACCGTTCCTCCGTGAGAGAAGGGTGTGACAACTTGACACATCTCCAACAACGAACTCACCAAAACCTGAAGGTCACGTA                                                                                                                                                                                                                                                                      | NA                         | NA                          | NA |

| Marker IDs   | Genetic positions (cM) | Chromosomes      | Physical positions (bp) | Flanking sequences/Forward primers                                                                           | ICC 12968 | ICC4958 | Flanking sequences/Reverse primers                                                                                                                                                                                                                                                           | Annealing temperature (0C) | Amplified Product size (bp) |     |
|--------------|------------------------|------------------|-------------------------|--------------------------------------------------------------------------------------------------------------|-----------|---------|----------------------------------------------------------------------------------------------------------------------------------------------------------------------------------------------------------------------------------------------------------------------------------------------|----------------------------|-----------------------------|-----|
| Ca-II-SNP834 | 92.52                  | Ca-desi-LG(Chr)5 | 6675851                 | TTATACGATTTACGTGTATATACGCACACCCAAT<br>TATTATATCATTCTTTTATGCGTTTGACTATTATTA<br>AATGTGACTTAATTATATTTATTTAATT   | T         | C       | ATCATAATAAGTATATCAAAATAAAGAAAATCAA<br>ACGCAATATTACCACATCTCAAGATAATTATTT<br>ATAAAGTAATAATTAATAATAATATATTTA                                                                                                                                                                                    | NA                         | NA                          | NA  |
| Ca-II-SNP835 | 93.66                  | Ca-desi-LG(Chr)5 | 6815620                 | TTGCCTTATACTGATATGCTGGAAAATAGTGCATC<br>TTTTGTTTTAAGCTTTTGGCAAGGGGCATAATT<br>TGCGTTTTCTTTATATTCTATCATCTTTC    | A         | G       | ACTTAGATATCAAGTCAAACAACCTTAAGAAAA<br>GGTGAATTGATAGTTAAAGATATTCTAACTAAAA<br>CAAGAACAATAACGTTCAAGAGTAAGTTACAAC                                                                                                                                                                                 | NA                         | NA                          | NA  |
| Ca-II-SNP836 | 94.80                  | Ca-desi-LG(Chr)5 | 7026863                 | GCGTGAGGATGGGTTCTGCCTGGCCTAACAAGCT<br>GAATGACAGTTCGTAAATTATGATGAAAAACCTTG<br>GATCCTTTGAAAAATGATTTCCAACGGTCAT | A         | C       | TGCTTCTTGAAAACCTTAAAGATGCTTGATCTTTT<br>TATGCAATTGTGTTGTGTGTAATCCAATGGAGA<br>GCTTGTTAGCATTTTATAGAGATCCAAGCCCTT                                                                                                                                                                                | NA                         | NA                          | NA  |
| Ca-II-SNP837 | 95.94                  | Ca-desi-LG(Chr)5 | 7061392                 | AACCAGCACAGGTGGTAAGGTAAGTGTGCTTGTA<br>TCTTTGTTCTGCTTTAAGCCAATTTAATTGTGGAT<br>CGCAACTCAAAATTTAGTGTGTCAGAAT    | C         | G       | TCTTCCATTGTCTAAATTGTTTTGATTGAAGTTA<br>TATTGCACCGATGGTGAAAAGTTGATTTCTTGG<br>TTTGGTATGAGAATGCCTTAAGGTTATTTGGG<br>GAGTAATATAAGCTATTATGGGGGATGTTGG<br>GTTTATATGGATGCATAAGAATGTTGCACGTTT<br>TGTTGAAAAATATATTTTGTGGGCGTCA                                                                          | NA                         | NA                          | NA  |
| Ca-II-SNP838 | 97.08                  | Ca-desi-LG(Chr)5 | 7119562                 | TGGCTGAAACAATTTTAGCCGACTTTACTTATC<br>TCTAGGCCAACTCCAGATTACTAGGTTCTTTCC<br>CCTAAGAACCGGAGGTTAATACCAACAA       | A         | G       | CTAATAAGTACTATACAATATAGATTCTGGTTAA<br>TTACGTAGCCCTGAGTTGCAAATGGGATGCAC<br>CAGGATGGAACCTGATGCTGGTATTTAGTATTT<br>A                                                                                                                                                                             | NA                         | NA                          | NA  |
| Ca-II-SNP839 | 98.22                  | Ca-desi-LG(Chr)5 | 7177410                 | CGACCTGCCGATTTCGAACACGACCTAAGGAT<br>GACAACATGATTTTTCCAACACAGTCTCCGCTC<br>TACCAACTGAGCTAAGGTCGGTTCTGTTATG     | A         | C       | ACAGAGTCCACTCTCAACACTGCTTACTCTCTC<br>TTCTCCAATGAACAAAAACCTCACGGAAGCG<br>TGCGGCGCGCGCACCGGCACCGCCGCAACAA<br>CCACCGACGAACAGGCACTGTCTCAGGAAGA<br>CGAGTTTCTCGACGAAGACGTGTTCTCGGACG<br>AAACCCTCATTTTCGGAAGACGAAGAGTCCGCA<br>ATTCTCCGTGACATCGAGCAACGCCAGGCCCT<br>ACCTACTCTCTCTCAAACTCCACTCTCTCTCTC | NA                         | NA                          | 146 |
| Ca-II-SNP840 | 99.36                  | Ca-desi-LG(Chr)5 | 7236249                 | CCTTCAGAGGACGGAGACAAGGAAGGCTGAGGG<br>ATGGCTGGAATGTTGGAGGAAGATTACGCATAG<br>GTGGTTCAAGACCAAGCTTTGGGGCAAGCTGAT  | A         | T       | CTTACAAGAATATTCACAAAAATTTGATGCTCT<br>ACAAACTATCATTGCGCGCCAGGCCATCAAG<br>ATAAGGAACAGGCAATTTTGCCTGACTGGATG<br>GA                                                                                                                                                                               | NA                         | NA                          | NA  |
| Ca-II-SNP841 | 100.50                 | Ca-desi-LG(Chr)5 | 7253490                 | TTCGATTTATCCCACTGACGTTGAGCTGTTATG<br>TATTTTCTGAAGAGGAAGGTTATGGGTAGAAAATT<br>CCCTTATGATGTCATTGCTGAACCTTGACAT  | T         | A       | TGAGAAACATAAGTACTATTATAATACTCTACCA<br>TCCAAGAAAAATAACCACTCAGTGCCAAATC<br>CAAACCTGGTAGATCCCATGGAGCATACTTGTA                                                                                                                                                                                   | NA                         | NA                          | NA  |



| Marker IDs   | Genetic positions (cM) | Chromosomes               | Physical positions (bp) | Flanking sequences/Forward primers                                                                           | ICC 12968 | ICC4958 | Flanking sequences/Reverse primers                                                                                                                                                                                | Annealing temperature (0C) | Amplified Product size (bp) |    |
|--------------|------------------------|---------------------------|-------------------------|--------------------------------------------------------------------------------------------------------------|-----------|---------|-------------------------------------------------------------------------------------------------------------------------------------------------------------------------------------------------------------------|----------------------------|-----------------------------|----|
| Ca-II-SSR285 | 101.64                 | Ca- <i>desi</i> -LG(Chr)5 | 7263577                 | CGGCGACGATAAGAAGACTC                                                                                         | (TC)14    | (TC)15  | GCATTTCGATTACATTAC                                                                                                                                                                                                | 59.98                      | 145.00                      | NA |
| Ca-II-SNP842 | 102.78                 | Ca- <i>desi</i> -LG(Chr)5 | 7268725                 | AATATTGTTCCAGGATTGATCTTCGTTTTTCAAAA<br>CTGTTTCAAGATCAATCTGCGTTTTCCAGAAGCTC<br>TTCAAGATCAATCTGCGTTTTCCAGAAGCT | A         | C       | TTTATTTTACAACCGTTGGATTTTATATCAGCTC<br>AATGTCAGTGGTCTTCCAGGTTTATGCTTTCTT<br>ATATGGAAAACTTTATTTGTCAGTACTGAGTGGAGT<br>TGAGGCTGCTATAGTCAAGTTAGCTAGAAAGGAA<br>GGGAGACGATCCTTTGAAGGCAGCAATGGCTT<br>CGCAATCCCTTGTTCAAATT | NA                         | NA                          | NA |
| Ca-II-SNP843 | 105.06                 | Ca- <i>desi</i> -LG(Chr)5 | 7292924                 | TTCAGGGAGAAGAAACACTTCCGTTTATTTGGAA<br>TACGTCTCTGGAGGTTCTATTCAAATAACTTCA<br>GGACTATGGGGCCTTCAAGGAGCCTGTTAT    | C         | T       | GCTTAAATAAATACAACATCAATAGCAGAATTA<br>CCTATGCACTGTATTTCTCCCGTGAAGATAGGC<br>AAGTCCAGAGACAATCTGTCTGGTATAATTTG                                                                                                        | NA                         | NA                          | NA |
| Ca-II-SNP844 | 107.34                 | Ca- <i>desi</i> -LG(Chr)5 | 7336211                 | TTGACTTGTCTATGGAAATCAGGAAACTGTAGATG<br>TACTGTTGAAATTTTGTTTTTGTTAACTGCATTTT<br>ATTCCTCAAAGTCTGCAGTTTACGATGT   | C         | A       | TGTTTCCAACAAGCATCTTGATGCAGTCTGAT<br>TTGTTGAATAGAGGTCTATTTCTTAGCCCAT<br>CTTCAGAGAGATTTGTAATGTATCTCGCCGAG<br>T                                                                                                      | NA                         | NA                          | NA |
| Ca-II-SNP845 | 108.48                 | Ca- <i>desi</i> -LG(Chr)5 | 7359768                 | CTGCCTCTTCGCCGTCTGAGTGCACGTTGTTTT<br>GTATGTTGCTTGTATGCAACATTATTTTTCCATT<br>TTGTTGCGGTGTTGTTTATTGATCATATTGA   | G         | C       | GTGATATAATTAAGTGTGTTGAAATATTCATGCA<br>TTTGGAGTTTTAACGTTGAAGATGTCAAATAA<br>TTGCTTGAATTTATAATGGATAGAGGTTAATTT                                                                                                       | NA                         | NA                          | NA |
| Ca-II-SNP846 | 109.62                 | Ca- <i>desi</i> -LG(Chr)5 | 7440439                 | TTGTATCCCCTGATAAATTGATTGGTTGAAATAATG<br>CTATTAACGATGATATATTACTGATAAATTTGT<br>ATAAGATTGATTTGTTGCTTTGGGCGAG    | G         | A       | TACAATATCACATATTAATTCACCCGAAACTAGC<br>AGATACATTCATGACCATAATATCCACATCATT<br>ATTATTAACATTCTCATTATTGACATTG                                                                                                           | NA                         | NA                          | NA |
| Ca-II-SNP847 | 110.76                 | Ca- <i>desi</i> -LG(Chr)5 | 7498913                 | ACATTGTTCTTTTATTGTTTACTCCCAGGTGAAA<br>GGTTTGGATGTCGATGCTCTATACGTATCTCATGT<br>CCAGGTCAACCAAGCTCAAAGCAAAGACG   | T         | A       | ATATATAAGATTAAGAATGTAACAACAATATACA<br>TACATTAAGACATAAATAATATAAGCACAAACATA<br>CGATTGATTCTTCCGTGAGCAGGTTATGTACG                                                                                                     | NA                         | NA                          | NA |
| Ca-II-SNP848 | 111.90                 | Ca- <i>desi</i> -LG(Chr)5 | 7636893                 | ATCACATACCCTATCCTCGTCTATCATAACATGA<br>ATCTGCAACCTGGTTTAGCCCTGATCCATGAAAC<br>ACCAATGAACATCTTTTCCGGGTTTGGACT   | T         | C       | GCGGTGAAATTCAGCATCAACACCATGCCTGAT<br>GTAGAAAATGGAAGACAAGAAGCTTAAATCATGAG<br>AATGCAGAGAATGACGATACAGTATTGTTACG<br>A                                                                                                 | NA                         | NA                          | NA |

| Marker IDs   | Genetic positions (cM) | Chromosomes      | Physical positions (bp) | Flanking sequences/Forward primers                                                                            | ICC 12968 | ICC4958 | Flanking sequences/Reverse primers                                                                                                                                                                            | Annealing temperature (0C) | Amplified Product size (bp) |     |
|--------------|------------------------|------------------|-------------------------|---------------------------------------------------------------------------------------------------------------|-----------|---------|---------------------------------------------------------------------------------------------------------------------------------------------------------------------------------------------------------------|----------------------------|-----------------------------|-----|
| Ca-II-SNP849 | 113.04                 | Ca-desi-LG(Chr)5 | 7749351                 | TTCGATTTTCATCCCACTGACGTTGAGCTGGTTATG<br>TATTTTCTGAAGAGGAAGGTTATGGGTAGAAAATT<br>CCCTTATGATGTCATTGCTGAACTTGACAT | C         | T       | GTCACGACATGAACCTCCATATGATCCTCTTAG<br>AGTCAAATCATAAGCGCGTATTATATTGCAGA<br>ATACTATCTTTGACAGCAAGTTCTTCAAAGAA<br>GACAGTCTCAGGTAACCAATTTTCATGTTCTCAA<br>TGCTGAATATTTGGAGAAGCATTTTCCAGCCTG<br>GTTTTGATAATGAAGTTCCTG | NA                         | NA                          | NA  |
| Ca-II-SNP850 | 114.18                 | Ca-desi-LG(Chr)5 | 7800119                 | TTTTTCAAACCTTATATTTTAGAAGGCTTGGCCTA<br>TGATGGATCGACTATGTTTTGGTATTTTAGGAT<br>CTTGCACTTTGATTATTTTGATGCTTGCA     | T         | A       | ATACACATACAATAAATATCAAAGTTGTAATTT<br>TATCATAAAATCTTGCATGCATGAAAATATCA<br>AACTTGTAGAAGGCTAAAATAACATAAAATAT                                                                                                     | NA                         | NA                          | 140 |
| Ca-II-SNP851 | 115.32                 | Ca-desi-LG(Chr)5 | 7834440                 | ACTGTATGAGAGTTATAGATATGGCTAGTTATAGC<br>TTTAAGTAGAACACTTTTCAAGCTTGTAGTGCAT<br>GTCTGGTTTCAATTTTGAGGGGTCAAAAT    | C         | G       | TACAACTTAACTTCAAGTTGGAATCAATTCTG<br>GAGGCAGAATCAATTTCTACTCAACAACATCCAA<br>ACATGCCAAAATCAATTTTACACATTCAAAAT                                                                                                    | NA                         | NA                          | 118 |
| Ca-II-SNP852 | 116.46                 | Ca-desi-LG(Chr)5 | 7851698                 | TTGTTTCAAGTTGTGCCTTTTAAATTTGATCCTTT<br>TGAGTGATTATTTTGTCTCATATGAGAGTTGTATAT<br>TCCTAGTACATGAACTGGAATCCATTCA   | C         | A       | AAGATCTACTTCAAAGATTAACAAAGACAAAA<br>GCTAAGCATCAAGAACTAACAGCAAGATCAAA<br>TCTGTTTTGAATGCAAGGAAAACATGCAAAAT<br>T                                                                                                 | NA                         | NA                          | NA  |
| Ca-II-SNP853 | 117.60                 | Ca-desi-LG(Chr)5 | 7881404                 | GGGTTGAATAAGGATTTTGTCTGTTAAAAATTTTC<br>AAGTGTAAAAACTATCCTCTTGCAGAGGATGA<br>CAAGCCCGAGGATGGGTTTTTCAAACCTT      | T         | C       | GGGTGAGGACTGGAAGTAGCCATCTTTGGGT<br>GAACCAGTAAAAACAGTGTGTGCAATCTTA<br>TATTTCTCTTCACTCTTTAGCTCAGTTCAAATC<br>T                                                                                                   | NA                         | NA                          | NA  |
| Ca-II-SNP854 | 118.74                 | Ca-desi-LG(Chr)5 | 7952610                 | ACATGGCATATATAAATGTGCAGCGAGCTTAGTA<br>CAAACATACCTTTCTCGGCCTTTTGGCTAAGAT<br>CAAGTGTAGTATCTGTTCTTATCAGTTTAA     | T         | C       | AAGCAACACTTGAGAAATCCAATAGCAAGCTAT<br>TGAGTGAAATCTCCCCCTCAACAAATTAATTTA<br>ATATCGTGTGAACCATTTGGTTACATATCAGAT                                                                                                   | NA                         | NA                          | NA  |
| Ca-II-SNP855 | 119.88                 | Ca-desi-LG(Chr)5 | 8013361                 | TAGGAGGAATGCTAGCGAAACACTCTCTAACACA<br>CACTTTCTAACCCACTCTCTTTGATTGGTTAAAAAT<br>CATTTAGGTCTCACTAAATCATGTGGTCC   | C         | A       | CCAAATGCTAGAAGTTTCTTGATCTAATAAAA<br>AAATAATGCTAACCAACACTCACTTTGATTGG<br>TTAAATCCACATGGGTCCCAAAATTCATAT                                                                                                        | NA                         | NA                          | NA  |
| Ca-II-SNP856 | 121.02                 | Ca-desi-LG(Chr)5 | 8089920                 | TTGATCATATTAGCATTGATTCATGATCATTAAATC<br>TTTTGGCCGGCATGCCACCAATAAAATCAAGG<br>ATCGTGTGGAGAAAATGAGACTTGGTTCCA    | T         | C       | TAACTTTATTATTGGTCCAAATGAAATATATT<br>CACTCAAAAATAAAGTGCACATGAATATTTTAT<br>TAACATATTGATGTATACACACAATCATAAA                                                                                                      | NA                         | NA                          | NA  |

| Marker IDs   | Genetic positions (cM) | Chromosomes      | Physical positions (bp) | Flanking sequences/Forward primers                                                                            | ICC 12968 | ICC4958 | Flanking sequences/Reverse primers                                                                              | Annealing temperature (0C) | Amplified Product size (bp) |    |
|--------------|------------------------|------------------|-------------------------|---------------------------------------------------------------------------------------------------------------|-----------|---------|-----------------------------------------------------------------------------------------------------------------|----------------------------|-----------------------------|----|
| Ca-II-SNP857 | 122.16                 | Ca-desi-LG(Chr)5 | 8339399                 | TTTATTTGGTGTGTCAGTTTCAGTTGTGTAAGTCAAGT<br>TGTCCTTTCTGCATAGGTGCATTATCAATGTTCTCT<br>TTATCCTTGTGTCCTATTGCTACTTGT | T         | C       | CATCAAGGCAACTCAAACTATGATCAAGCACA<br>AAAGTTTAAAATAAGCAAAACAACATCTAGAAC<br>CAGAATAAAATCAATCTCCATATTGATGACCTAT     | NA                         | NA                          | NA |
| Ca-II-SNP858 | 123.30                 | Ca-desi-LG(Chr)5 | 8490412                 | AAAGAAATAAACTTAAAACAAAAGAGTCCTTGT<br>CTCTGTTTTGCCGATTTCTCTGCTTTGCCGTGTG<br>CTAGCTTTGACGTGTACAGTGCGTCTCCAT     | A         | G       | ATTTTACACTGCTATGGGTTGTTGTTCTGGATT<br>TTACTGCTGGTGGGTTGTTGTTATGGATTTTA<br>CACTGCTTTAACTCTATGTGGAGACGCAACCTC<br>A | NA                         | NA                          | NA |
| Ca-II-SNP859 | 124.44                 | Ca-desi-LG(Chr)5 | 8551737                 | TTATTATTTCTTAGAATTTTGTGTTTTGTTAATTTT<br>TTATATTTTTATATTACGCTCTGTGTTATAAAT<br>TTATAATTTTATTATTTAATACATC        | A         | C       | TAGATCCCAACCATTGTCATTGGAGAAATGAT<br>TGATTTTTTAGTATATCTAAAAATTAATCACTC<br>AAAATCACAACATTAATCTTTTAAACAATCAAA      | NA                         | NA                          | NA |
| Ca-II-SNP860 | 125.58                 | Ca-desi-LG(Chr)5 | 8598213                 | CGACCTGCCGATTTCGAACCGAGCTAAGGAT<br>GACAACATGATTTTTCCAACACAGTCTCCGCTC<br>TACCAACTGAGCTAAGGTCGGTCTGTTATG        | G         | A       | AAGACAAATTCATTGATATCAGATATCGATTAC<br>CTGCTCAAAATAAATCATTGGATTATCTTAATGCA<br>TTACATATTGTATAATCGCATTACCTGAGGGG    | NA                         | NA                          | NA |
| Ca-II-SNP861 | 126.72                 | Ca-desi-LG(Chr)5 | 8629542                 | ACTCATAGGCGAACCTCTTAAATCATCAACCTTAG<br>ATCTATCTTCTCAGCCTTTTCTCTTGAGGTTTC<br>AACCGCTCTTGATAAGCAACAACTCTTCC     | A         | T       | CTTGAAAATCCCTAACTCTGTTAGTTAATCCTT<br>CTTGGGTAAGTGAACAATAAGAAATGAAACC<br>TTCTAGAACGAGTGAAGGATTATCTGTTAATGG       | NA                         | NA                          | NA |
| Ca-II-SNP862 | 127.86                 | Ca-desi-LG(Chr)5 | 8685227                 | CCATCTCTTCTCCAATAATCGGTGCAACATGA<br>GATTGATGCATATACTACCATTTAATTTTTCTA<br>AATTTCAAAATATCGTTATCTTAGGTACC        | A         | G       | TAAAACACATCGCACACAAGAAGGTTCTCACAT<br>ATTAAGTGGGCCCTAGGTCCCCCACAAAAAC<br>AAAACATGTCACATTTTATATAGAATGTCCT<br>G    | NA                         | NA                          | NA |
| Ca-II-SNP863 | 129.00                 | Ca-desi-LG(Chr)5 | 8772605                 | AACTTTAGTTAATAGTATCTTACGATACATGCAAGT<br>CGTACCGCTTTTTCGATATAAACTGAACCCAATTG<br>ATACGTATCTACTGTGTATCTCACTGG    | T         | C       | AGGGGTAAGCACTGTTTCGCGCAGGTCGCGA<br>GAGCGGTGCCAAATCGAGGCAAACTCTGAATA<br>CTAGATATGACCCCAAAATAAGAATGGTCAAGG<br>TCG | NA                         | NA                          | NA |
| Ca-II-SSR286 | 130.14                 | Ca-desi-LG(Chr)5 | 8857368                 | GAGTCAAATTAACAAAGAAGCATAGA                                                                                    | (AG)6     | (AG)7   | AAAATGCCACAAGCAAG                                                                                               | 57.47                      | 124.00                      | NA |

| Marker IDs   | Genetic positions (cM) | Chromosomes               | Physical positions (bp) | Flanking sequences/Forward primers                                                                          | ICC 12968 | ICC4958 | Flanking sequences/Reverse primers                                                                                                                                                                                                                                  | Annealing temperature (0C) | Amplified Product size (bp) |    |
|--------------|------------------------|---------------------------|-------------------------|-------------------------------------------------------------------------------------------------------------|-----------|---------|---------------------------------------------------------------------------------------------------------------------------------------------------------------------------------------------------------------------------------------------------------------------|----------------------------|-----------------------------|----|
| Ca-II-SSR287 | 131.28                 | Ca- <i>desi</i> -LG(Chr)5 | 8858941                 | TGCCCAATATCTTATATCCAGG                                                                                      | (AT)10    | (AT)13  | TCCATTGATTATTGCTTTTCAA                                                                                                                                                                                                                                              | 57.99                      | 218.00                      | NA |
| Ca-II-SNP864 | 132.42                 | Ca- <i>desi</i> -LG(Chr)5 | 8895007                 | AACCAGCACAGGTGGTAAGGTAAGTGTGCTTGTATCTTTGTTCTGCTTTAAGCCAATTTAATTGTGGATCGCAACTCAAATTTAGTGTGTCAAGAAT           | T         | G       | ATAAGTGAACATGATTATAATTTTCTAATTCGTTATAAATGAAAGAGCAATTAATAGGACAATCTATACTATATCTCTTAGTCTCATCTAGTTGGAAGA                                                                                                                                                                 | NA                         | NA                          | NA |
| Ca-II-SNP865 | 135.84                 | Ca- <i>desi</i> -LG(Chr)5 | 9147463                 | CCATTCTTTTTCAGCATCTTGTATTACCATATCAA<br>GGTTTATTCTTTATTTTATTCCACCATATGTAGTTTACGATTTTACAAAAGTTGGTAATGTGATAG   | C         | T       | TGACAATATAGAGTCCACTCACCACCATCAGCGAATCATCTAATCCTCCACTCCAGTGTGTTTGA<br>GAACTACATTGTCAATCATCTTTCCACATGGCCATTTCGAACCCTATTCCTAGAAAAACCTAACCTCTATTCTCCGCAATGATCCAAACCAATTGTGCAGGCATAGCAGCATCAACTCAATCCCGTGACTTGCATGTCTTACCGCTACCCGATCTCGCTTACCACTATCCCGCTTCCAGCTCTCATCAGC | NA                         | NA                          | NA |
| Ca-II-SNP866 | 136.98                 | Ca- <i>desi</i> -LG(Chr)5 | 9152669                 | GGCCTTAAATCATCTCCTTTATAATCAGTGTGGAGCAAGAAGTGATCACCTTAACCAGATTCCGATGCCTAACATTTTTCAAAGTTTCACATTCTGCA          | G         | A       | GTGTTTCTAATAGTCATGATTCTAAATGTTTTTCCCTTATTTTTGGGTTACGTTACCTGTCTAGCCAGTAGTCCAGAAAGCTTGGTGAAGTTAGTGAAGAAATTAATTTTCCCTATTTGCATAGCTATGGTGGTGGTAGTGTGGAGGATATGGTAGTGGAGGACCTAGTTTTGGTGGTGCATTGGAGGTGATATGACCATGGAGGATCAATGGCGGAGGATTCGGCTTCAATACCAGCATCTACTCCCGC          | NA                         | NA                          | NA |
| Ca-II-SNP867 | 138.12                 | Ca- <i>desi</i> -LG(Chr)5 | 9317619                 | TGCTTAATTGCACTTTTGGTCCCTATTATAGGTGAAAATTAAGTAGTCCCTCCATTTGTTTATCCCCAGTTTTAGTCCCAAACTGAATTTCAAGT             | C         | T       | ATCAGAAATAATAATAATGAGTTTTATTCCACATAAGCGTTTCCACGTCACTATTTTATTGACATGTCATTTAAAAATAACAACCTCATCATGTTTTG                                                                                                                                                                  | NA                         | NA                          | NA |
| Ca-II-SNP868 | 139.26                 | Ca- <i>desi</i> -LG(Chr)5 | 9393004                 | AGGTGGTTTTGGTTACAGGTGATACCAGTGAATGACATGGGTTTTGGTTTTGGAGCCAATCATGGAGAA<br>GAGATGGGTTTTGGGAGAGTTTTCTTTGAAGTTG | G         | A       | ACCACCACCACCTCTCTCTTTCTCCTCCTCTCTCTATTCTCCTCCACTTATCACCATCCCACTCTTCTCTCAAAAAGACCCAACCTACTTCACAACCTTA                                                                                                                                                                | NA                         | NA                          | NA |
| Ca-II-SNP869 | 140.40                 | Ca- <i>desi</i> -LG(Chr)5 | 9415820                 | TTTGAAAAAACTGTGTTTTCTGGAAAATACGGGACGGTCTGACAGGATCGGGATGTGACAGTGGTGC<br>AAGATTAGGGCAATTCGCGGCCGCGAGCACC      | A         | G       | GTGTCATAATCACATAATCTGTGCATCAATTCCGGAATCCCGGTGCAGTAGACAGACTTACTGCGACGCCACCAGCGTGAAACGCCTTCGACGGGTG                                                                                                                                                                   | NA                         | NA                          | NA |
| Ca-II-SNP870 | 141.54                 | Ca- <i>desi</i> -LG(Chr)5 | 9447895                 | GCTTTGTCTCTCTCTGAATAGCGCCACTGTGAA<br>GAGAGATTTTAGACAGAGAAAAAGAAATGAAAGAA<br>TCTCGTTTTCCCTATGCATATGTTTTGTGGC | G         | A       | TAGTTTGAATGAGATGATTAGTAAAGTAAAAACGGCACCGTTTTTAGCCATTATTGTTGCTTTCCCTTTAGTACGAAAGTAAAAAGCCCAAACTCT                                                                                                                                                                    | NA                         | NA                          | NA |

| Marker IDs   | Genetic positions (cM) | Chromosomes      | Physical positions (bp) | Flanking sequences/Forward primers                                                                              | ICC 12968 | ICC4958 | Flanking sequences/Reverse primers                                                                               | Annealing temperature (0C) | Amplified Product size (bp) |     |
|--------------|------------------------|------------------|-------------------------|-----------------------------------------------------------------------------------------------------------------|-----------|---------|------------------------------------------------------------------------------------------------------------------|----------------------------|-----------------------------|-----|
| Ca-II-SNP871 | 142.68                 | Ca-desi-LG(Chr)5 | 9467589                 | TCGAGGTTAAGGTTCTACATTTCAAGTGAAGGCACA<br>CACCCCTTGGTGCTTTTGACATGCTTTTAGTGCCCC<br>TTATTGATAACTGTAATTAATAATCCCGTAG | A         | C       | TGTTGCAAAACATAGTCCCACGGATCAGATAAC<br>TTTTTAACAACATTCAGACTATTTTACTTCCCTT<br>ATAATTATTCATATTACATTATGTGGCTGAGCT     | NA                         | NA                          | NA  |
| Ca-II-SNP872 | 143.82                 | Ca-desi-LG(Chr)5 | 9486442                 | TACCATTGTTTTATTATTACATTATGTAAGCCATAA<br>CATTCTTTCTATCTCCATCTTCTGCCTCACACTTA<br>TATTCATCATTTTCTCTCACACCCTCTT     | A         | C       | AACATATGTTGAAATCAAGCATAATTATTGACAA<br>AGCATAAATGGGGGTCAATAAAGATGATTGAAG<br>ATGTTGAAGTGTGTTGAAATGAAGGAAGAAAGA     | NA                         | NA                          | NA  |
| Ca-II-SNP873 | 144.96                 | Ca-desi-LG(Chr)5 | 9533963                 | TATTCCTTTTTCTGTCTTGTACGGTATTTATTT<br>TCCTCTTTGAATAAAAGATCAAGCATTGAAATGGA<br>GGTTTGGTGTGTTGAACTAAATTTATTG        | T         | G       | TGAAATTTGCTTGAATCCTAAATAAACGTCGGA<br>TAAATTTTACTAATCGATCACCCAAAAGAACGT<br>TCTATCCATGTGCTTTTCTCTCATGCTATTTT       | NA                         | NA                          | NA  |
| Ca-II-SNP874 | 146.10                 | Ca-desi-LG(Chr)5 | 9591040                 | TCTTAGATCGGTTTCATTAAGAGGTTTCCAATATAT<br>ATTTTTTATAACAATGATACACATATACTCCTAAT<br>TTTTTGTACTCATTCAACATTTCAATTT     | C         | A       | CACCTATAGAAGTGATACACTTTGAAAAATAAA<br>GAGATAAAAAAGTAACGTGCTAATATAATATA<br>TTGATAATGTGATAGAAGAGAGACATAAAGA         | NA                         | NA                          | NA  |
| Ca-II-SNP875 | 147.24                 | Ca-desi-LG(Chr)5 | 9616056                 | GTTGTTTTGTTTGAACGCTATATTGCATCAATTTTT<br>GAAACACTTCTTTTTCGTTAGTTATGGTAAATTTG<br>GACTTTTCATTGCAAAGTATTGGATTCA     | G         | C       | GTTCCAGAACTTATTTTGTCTCAATTAAGTTTTTT<br>TTTCTCAAGCAGAGGATTGAATCTTCTTGACTA<br>ATCAAGAATGAGAAAAATTTGTATCCCAACAGGT   | NA                         | NA                          | 103 |
| Ca-II-SNP876 | 148.38                 | Ca-desi-LG(Chr)5 | 9639080                 | GGCCTTAAATCATCTCCTTTATAATCAGTGCTGG<br>AGCAAGAAGTGATCACCTTAACCAGATTCCGATG<br>CCTAACATTTTTCAAAGTTTACATTCTGCA      | C         | G       | GTTTACAAGGGTGTGTTCAACATCAGCACTTGT<br>GAAAAATCAAACCACACTTGCTGTTAAAATTCTG<br>GACCTACAACAAAGCAAGCATCTCAGAGTTTT<br>A | NA                         | NA                          | NA  |
| Ca-II-SSR288 | 149.52                 | Ca-desi-LG(Chr)5 | 9669602                 | AAAAATGACCCAGAAAACCTTTATTT                                                                                      | (AC)8     | (AC)7   | TCAAAATCTTCGTCTCACTTTGA                                                                                          | 57.85                      | 127.00                      | NA  |
| Ca-II-SSR289 | 150.66                 | Ca-desi-LG(Chr)5 | 9669764                 | AAACCCAGAGAGAAATGAAAA                                                                                           | (AG)12    | (AG)11  | CAAAAAGTCAGTGACGCGAA                                                                                             | 59.11                      | 164.00                      | 129 |

| Marker IDs   | Genetic positions (cM) | Chromosomes               | Physical positions (bp) | Flanking sequences/Forward primers                                                                           | ICC 12968 | ICC4958 | Flanking sequences/Reverse primers                                                                               | Annealing temperature (0C) | Amplified Product size (bp) |     |
|--------------|------------------------|---------------------------|-------------------------|--------------------------------------------------------------------------------------------------------------|-----------|---------|------------------------------------------------------------------------------------------------------------------|----------------------------|-----------------------------|-----|
| Ca-II-SNP877 | 152.94                 | Ca- <i>desi</i> -LG(Chr)5 | 9849475                 | AATATTGTTCCCAGGATTGATCTTCGTTTTTCAAAA<br>CTGTTTCAAGATCAATCTGCGTTTTCCAGAAGTGC<br>TTCAAGATCAATCTGCGTTTTCCAGAAGT | T         | G       | AAGATAGGTATCAAACATCACAATCAGATCAA<br>AGAAGCAGTTCTGAAAAACGAAGATTGATCTTG<br>AAGCAGTTTTAGAAAATGCAGATTGATCTTGAA<br>G  | NA                         | NA                          | 247 |
| Ca-II-SNP878 | 154.08                 | Ca- <i>desi</i> -LG(Chr)5 | 9929528                 | TAACTTCCTTCTCTCTCTCTCTATATATATA<br>TATATATATATAGTTAGGGATGGGTAGGGTTTG<br>GGTAGGGTACTATAGTATCCGTTCTCATA        | C         | T       | TCAATTATCTCAAATAATATTGTCATATGAGTTG<br>CAACTTCACAAAATATTATTATGGATATTTAAAT<br>ATATACAGTATGAATATTTTTTAAATCGCAG      | NA                         | NA                          | NA  |
| Ca-II-SNP879 | 155.22                 | Ca- <i>desi</i> -LG(Chr)5 | 9941575                 | ATGAGATTATGTCTAATTGTCATCCCTACTTTTGC<br>GCTATTTGTTGTTGCTACTTCTTACATTTAGGGG<br>CGGAAATATGTCCATTGATTTATAGGAGTT  | C         | G       | TTTCCAATTGAGACATGGGTCCACAATGAAATG<br>AGAAAAATATGGTGTAGTAAAGTATATGTTTAAAT<br>ATGAATGACAAACTACAAAAAACTTGGCTAT      | NA                         | NA                          | NA  |
| Ca-II-SSR290 | 156.36                 | Ca- <i>desi</i> -LG(Chr)5 | 9946606                 | CCGGCTTAATGAAAGAGGAA                                                                                         | (AT)9     | (TA)9   | GCTTCTGCTATGCTCTTCTGG                                                                                            | 59.29                      | 138.00                      | NA  |
| Ca-II-SNP880 | 157.35                 | Ca- <i>desi</i> -LG(Chr)5 | 9988382                 | CTAATTCATCATTCTTCTTGAACATTGCCTCCA<br>CTTTATATTAGAGTTAGACATTACATTACATATTAT<br>CATTCAAGATGGCTTTTCAAGGGTCTC     | A         | G       | GCTTGCTTTTCAATGCTATGCTTTAAATTATGAA<br>CCCCTAAAAAGTTCAATAATTAATCTATCAAGG<br>GCTTATAATATGAATGAGTGATTTTTTGTCTTA     | NA                         | NA                          | NA  |
| Ca-II-SNP881 | 159.33                 | Ca- <i>desi</i> -LG(Chr)5 | 10001294                | TATCCTAACCGTATCATGCAAGCTTAGAAAATT<br>TATAGTTGATGATGAGATCCTATGATGCTCTCCAC<br>TTACAATAAGATCCTATGATCTTGCTACCC   | T         | C       | CTAGTGTAAATATTACAAATCAAATCCTTATCTT<br>AACAGAGCAAGGAGAATATTGCTTTGTCAGGTT<br>GTCAAGATTGATATTTTATGATCAAGATCAGGAAG   | NA                         | NA                          | NA  |
| Ca-II-SNP882 | 161.31                 | Ca- <i>desi</i> -LG(Chr)5 | 10104591                | CCTCTTCACTTCTATTATAATCATTGAATTTGGCTC<br>CTCTAAAGTGAGTGAATCAATGGTTGATCATCACC<br>CATGATTGGTCATGCATGTACACATAATA | T         | C       | AGTGAGCAACTCACTTTAGAGAATAAAGTGAGT<br>AATATCAACCATTGATGATCAAATGAATGGTTG<br>ATATTATGTGCACATGCATGACCAATCATGGTT<br>G | NA                         | NA                          | 134 |
| Ca-II-SNP883 | 162.30                 | Ca- <i>desi</i> -LG(Chr)5 | 10115516                | CCTTTACTATTACTAGGTCTAGGACTAGGACTTGG<br>ACTTTCTCTTTTCCCCTCTTCTCTTCAACCAAA<br>TTTTACTCCCTATGGATTTTTTCGATATA    | C         | A       | TTCGTCTGCTGGTGGTACTTTTTGGACAATTGT<br>GGATTCTAGAATTGGCTTTGAATTAGATTTTT<br>CTTCTTGGCGTAGAAAATTAAGGAATTTAGGGG<br>A  | NA                         | NA                          | 175 |

| Marker IDs   | Genetic positions (cM) | Chromosomes      | Physical positions (bp) | Flanking sequences/Forward primers                                                                      | ICC 12968 | ICC4958 | Flanking sequences/Reverse primers                                                                                                                                                                                                                                              | Annealing temperature (0C) | Amplified Product size (bp) |     |
|--------------|------------------------|------------------|-------------------------|---------------------------------------------------------------------------------------------------------|-----------|---------|---------------------------------------------------------------------------------------------------------------------------------------------------------------------------------------------------------------------------------------------------------------------------------|----------------------------|-----------------------------|-----|
| Ca-II-SNP884 | 163.29                 | Ca-desi-LG(Chr)5 | 10554811                | CTCAAATCTATCCTCGAATTTGGATACTTCATCCTCTAATTTTCATATAGACACATCTTGACTCATAATTC TTCTGGACTTCTTCCAAGAGATTTTATGT   | G         | A       | TACTTAACAATAATAAAGATTTGAAAAGCCTAATTCATAAATATAAATATGATTGCCCTTAAGTCGATGATGATCATCGCAATATGTTGCATCTCAATCA                                                                                                                                                                            | NA                         | NA                          | NA  |
| Ca-II-SNP885 | 164.28                 | Ca-desi-LG(Chr)5 | 10563588                | ATGAGATTATGTCTAATTGTCATCCCTACTTTTGC GCTATTTGTTGTTGCTACTTCTTACATTTAGGGG CGGAAATATGTCATTGATTTATAGGAGTT    | C         | T       | TGTGAGGCTGTCTATACATATGAATTTAATGTTTAAAAATTAAATAAAAAAATTTATATAAAAA CTGAAAAGCTACATTAATAAGCTGACTTTGCTA TTTACCAGAAAGAGTAAGAGACAGAGCCTCACA TCTTTTCAATTTTACAATTTTAAACCACATCAGTA GTTTAATTTTATCAAATGATTCAAGCACTTGAT CGTGTGGTTTCTGAAAACGCTGGAGTGATTCT TCTCTATCAATCTTTAAGCTCTTTTCTCAACTTAC | NA                         | NA                          | 121 |
| Ca-II-SSR291 | 165.27                 | Ca-desi-LG(Chr)5 | 10581198                | AAAAAGTCTATTAGGTCTGATAGGTCG                                                                             | (AT)9     | (AT)10  | GGAACGACTACTTAGTGATTGCCT                                                                                                                                                                                                                                                        | 58.87                      | 140.00                      | NA  |
| Ca-II-SSR292 | 166.26                 | Ca-desi-LG(Chr)5 | 10615669                | TCTTGTAAGCTTTAGCCGGA                                                                                    | (AT)11    | (AT)12  | CTCCCACTCAAAGTTTGTTC                                                                                                                                                                                                                                                            | 57.81                      | 183.00                      | 172 |
| Ca-II-SNP886 | 167.25                 | Ca-desi-LG(Chr)5 | 10689098                | CTAATTCATCATTCTTCTTGAACATTGCCTCCA CTTTATATTAGAGTTAGACATTACATTACATATTAT CATTCAAGATGGCTTTTCAAGGGTCTC      | T         | G       | GTCTATCGTTCCTCCACTTTTTGCAATAATGT AATCAAACCCCCCGCTGGCTGTTACTGTAAA GAAACTCAGTTTTTACAAGCTCTAGTTTCCTT CCTTGGAGGTCTGTTCTCCATTTATCCTTGA GATCAACAGGAGTGCAGTATTATCAAACACAC GACAACCAAATCTAAAATTTTCTCCAAGGGA TATTCTGATTCCCGTTGAGAAGTTCAACACTC CTGCTTCAACACTTTTTCTTCTCAAGCTCTCC            | NA                         | NA                          | NA  |
| Ca-II-SNP887 | 168.24                 | Ca-desi-LG(Chr)5 | 10700325                | GAAGGGTCCAGCACCAAGAACAAGAAGCCACGA TGGATATTTCCGTGCAGGAATTTCCCTTGGAACTCT GATTGGTCCGTACAGGATATTCAATTTGGCTC | T         | A       | CTGGCGCATACCCATTCTTGTATTTTGGAGC TGTTCTTCTCTGGTTCTGTATTTTCAAGTACCTC TGACCCTCATTGGAGGATTTATGGGAACAAAAG C                                                                                                                                                                          | NA                         | NA                          | 183 |
| Ca-II-SNP888 | 169.23                 | Ca-desi-LG(Chr)5 | 10814276                | GAGTATCAAAATTTAGGTAGAGTCATTTCTTCTG AAATATGCCAACCCCTCAGCAACTTAATTCTCTGTT AATTTTTCTTATTTCATTCAAAGGTCTCC   | G         | A       | TTCATATGTATCAAGAAAGTACCCCAAATTTTCA ACAACAAAAAATCATGTGTTATCATCATGTTTAT AAACATTAAGTATATTGTGATGTTT                                                                                                                                                                                 | NA                         | NA                          | NA  |
| Ca-II-SNP889 | 170.22                 | Ca-desi-LG(Chr)5 | 10901334                | CCATTCTTTTCCAGCATCTTGTATTCACCATATCAA GGTTTATCTTTATTTTATTCACCATATGTAGTTTA GCATTTTACAAAAGTTGGTAATGTGATAG  | T         | C       | ATCTTGGTAAACTTGTGACCCTAGGCTTGGTG AAAATTACCCTCTTGACTCAGTATTTAAGATGTC ACAGCTTGCCAAAGCTTGACACATGAAAATCC TCAACTTAGGCCAAGCATGAGATCAATAGTAGT TGCCTTAATGACACTTTCATCTGCAGCTGAGGA TTGGGATG                                                                                               | NA                         | NA                          | 242 |

| Marker IDs   | Genetic positions (cM) | Chromosomes      | Physical positions (bp) | Flanking sequences/Forward primers                                                                            | ICC 12968 | ICC4958 | Flanking sequences/Reverse primers                                                                                                                                                                                                                                                                                                                                                                             | Annealing temperature (0C) | Amplified Product size (bp) |     |
|--------------|------------------------|------------------|-------------------------|---------------------------------------------------------------------------------------------------------------|-----------|---------|----------------------------------------------------------------------------------------------------------------------------------------------------------------------------------------------------------------------------------------------------------------------------------------------------------------------------------------------------------------------------------------------------------------|----------------------------|-----------------------------|-----|
| Ca-II-SNP890 | 171.21                 | Ca-desi-LG(Chr)5 | 11006689                | CTGGACAGCAGTGAATATCAGTCTCCAGATTGAT<br>AAATATTCTCCAGCTTGTACACTTGATCTTCAGC<br>AGCAAATATTTTTCTCCAGAATGACCAGAC    | T         | C       | GTCCAAAACAGCTTGGTGAATGATTATACATTT<br>CTATAGAAATAAGGAGATCAATGCTGAAATTCT<br>GCATAATGAAGATTGATAATCAATCTGGAGAC<br>T                                                                                                                                                                                                                                                                                                | NA                         | NA                          | NA  |
| Ca-II-SNP891 | 172.20                 | Ca-desi-LG(Chr)5 | 11029004                | CACTTGCCACCACGAAACCCACATGTGCAGTTCT<br>CTCTGGCTACCGTTTTTCGAGCGCCGACCAGATCA<br>GGTGCCCTCTGCCACATCTGAGGTGTTTAC   | C         | T       | GAAACTGAAGGCACCAGAAAAAGCAGCAACCG<br>ATACAGTGTCCGACATGACAATCTATACGAAGG<br>GAAGATGAAAGGTTGCGAAAAATCACCAAAA<br>GAT                                                                                                                                                                                                                                                                                                | NA                         | NA                          | NA  |
| Ca-II-SNP892 | 173.19                 | Ca-desi-LG(Chr)5 | 11107994                | GGCCAGACCAGGCTTTGAAAGGCCTGAGCCTGG<br>CCTACGATGAATTTTTAAGGCCCTAAGCCTGGCCTA<br>CGGCCACAAATAGGCTTTTTTTTCGGCCTGAG | T         | C       | CATATTTTTTTTTAAATTTTTTTGTTAGAAAAATT<br>ATTTTTAATGTGAATAAGGCTTTTAAATAGGCTT<br>ACAGGTCAGGCCATGATAGGCCGTAGGCCAG                                                                                                                                                                                                                                                                                                   | NA                         | NA                          | 171 |
| Ca-II-SNP893 | 174.18                 | Ca-desi-LG(Chr)5 | 11131133                | CACTTGCCACCACGAAACCCACATGTGCAGTTCT<br>CTCTGGCTACCGTTTTTCGAGCGCCGACCAGATCA<br>GGTGCCCTCTGCCACATCTGAGGTGTTTAC   | T         | C       | GTGGACCTAGTTGGCGGTTATTATGATGCTGG<br>TGACAACGTTAAGTTTTGGGTTACCAATGGCATT<br>TACAACACTATTATTAGCATGGAGTGTCTTGA<br>ATTTGGAAGCTCAATGCAAGACCAAAATTGAAAA<br>TGCTAGAAGTCCATCCGGTGGAGCAGCGGATT<br>ACCTTCTTAAGGCGGCCGTCAACACCCCGAC<br>ACATTATATGTTCAAGTTGGAGAGGCTAACATG<br>CATCACAAGCTTTGCCAAGCCGACAGCATAT<br>GTGCAAAGAACAATTTATCATTCTCTATATTTCC<br>TAATAAGATATCTACAATGATTTCTTTACATTC<br>ACTAGATCAAGTTTACGCATCGAAAGCTTATG | NA                         | NA                          | 102 |
| Ca-II-SNP894 | 175.17                 | Ca-desi-LG(Chr)5 | 11184670                | TATTGGTAATTAATCTAATTTGAAATTTTCATTTAA<br>GGTTTTTGTATGAGAAGTTGGTGTGCACGCACAA<br>ATTGTCAAATAGATATTCATTCTTGTCTCC  | T         | G       |                                                                                                                                                                                                                                                                                                                                                                                                                | NA                         | NA                          | 109 |
| Ca-II-SSR293 | 176.16                 | Ca-desi-LG(Chr)5 | 11185022                | CCATTGCACAACAATTACAACA                                                                                        | (AT)10    | (AT)9   | GAGCTCGAAAACTTGTAAGCA                                                                                                                                                                                                                                                                                                                                                                                          | 59.39                      | 168.00                      | 149 |
| Ca-II-SNP895 | 177.15                 | Ca-desi-LG(Chr)5 | 11199544                | CGCAGCGGTCCTTTGCTCCAAATATATGACACCTTC<br>ACAAATTAATTTACTTCTCACCTTAGTGCAAAACTT<br>TTTAGTTTTATTTTTATAGATTGACGTA  | C         | T       | TTACACAGTAAAGGGAATGAAAGTTCTTAATAC<br>CATATATTATTAGGAACTCTACTATCTCATTATT<br>ATTGTAATAACGATCACACTAGTAATAGATTTT                                                                                                                                                                                                                                                                                                   | NA                         | NA                          | 144 |
| Ca-II-SNP896 | 179.13                 | Ca-desi-LG(Chr)5 | 11366972                | AATTTTACATTGCGTTTTGTTTTAGTGCAGTGCTG<br>AATTTTGGTGAGAAATCAACATGACATATATAGAG<br>TATTTCAAGTCATATCTGGAGTTGTAGATGT | T         | C       | ATTTTTCTCCTCTTTAGAGTCTGCATTTGGTTCC<br>GGTGTCTTCATGAAAGTTGTAGCTATGGATCTT<br>AGCTTTGATGTGCATTTGTTTGACTCCAATTG                                                                                                                                                                                                                                                                                                    | NA                         | NA                          | 142 |



| Marker IDs   | Genetic positions (cM) | Chromosomes               | Physical positions (bp) | Flanking sequences/Forward primers                                                                           | ICC 12968 | ICC4958 | Flanking sequences/Reverse primers                                                                                                                                                                                                                                                                    | Annealing temperature (0C) | Amplified Product size (bp) |     |
|--------------|------------------------|---------------------------|-------------------------|--------------------------------------------------------------------------------------------------------------|-----------|---------|-------------------------------------------------------------------------------------------------------------------------------------------------------------------------------------------------------------------------------------------------------------------------------------------------------|----------------------------|-----------------------------|-----|
| Ca-II-SNP897 | 180.12                 | Ca- <i>desi</i> -LG(Chr)5 | 11452105                | CCATTCTTTTCAGCATCTTGTATTACCATATCAA<br>GGTTTATTCTTTATTTTATTACCATATGTAGTTTA<br>GCATTTTACAAAAGTTGGTAATGTGATAG   | G         | T       | AGAAAAAATGTGCGAGATTGCAGTCATTTAGG<br>CATTTAATCAAACAAGTATATACTCATGAAGTT<br>CAAATTTCAATTAAGTAAATAAAAACTATTA                                                                                                                                                                                              | NA                         | NA                          | 157 |
| Ca-II-SNP898 | 181.11                 | Ca- <i>desi</i> -LG(Chr)5 | 11514809                | GAATTGACTGACTCAATGGTCAATAAGAAATAT<br>GTTACCTGATGTTTTAGAGTAGCTAAGCTCTTGGT<br>ATGCATTGGAGATTGTGGAATCACACCATT   | G         | T       | ACTAATACTTTTACTCCATCTAGTCAATATTTT<br>ATTTCAAATCTTGTGCGATTTTACTTTCCAGACC<br>ATATTGTGTGGGCTAATTGGAATCCCTCCTTC                                                                                                                                                                                           | NA                         | NA                          | 163 |
| Ca-II-SNP899 | 182.10                 | Ca- <i>desi</i> -LG(Chr)5 | 11563778                | CACTTGCCACCACGAAACCCACATGTGCAGTTCT<br>CTCTGGCTACCGTTTTCGAGCGCCGACCAGATCA<br>GGTGCCCTCTGCCACATTCTGAGGTGTTTAC  | C         | T       | CCCGTTTCAGGGTGGTCTTCAATGTTGTAGTAT<br>TAAATTAACAAAGAGATGGATGGAGTGTGAAAG<br>AGAAGTTTGAGAGTCCAATCGACTGCCTTGGT<br>GCGTTATGTGTGTTTTGTGTGCGACACGTCAT<br>GAAAGCTTTAGGATTTATATATGATGTAACATC<br>GAGGAAGATATGATAGTTG                                                                                            | NA                         | NA                          | 146 |
| Ca-II-SNP900 | 184.08                 | Ca- <i>desi</i> -LG(Chr)5 | 11567462                | AAGATAATGTTTAAAATCAAGAATCCACCTTGAA<br>GCTCTTTATATGATTCTCCTCAATTTGTCGTATATTC<br>TCTCAATGGCCTTTTGTGTTGCAATCCAT | A         | G       | AGCATCTTACAAATGGTAAACAACAGATCCACA<br>ATATCAGTTTCAGTATTGATTGCACATATACGAT<br>CTCGGTACACATATACCACTACTTATAGAAAA                                                                                                                                                                                           | NA                         | NA                          | 119 |
| Ca-II-SNP901 | 185.07                 | Ca- <i>desi</i> -LG(Chr)5 | 11592149                | GAACAATTTTAAAGGGTGAAGTCAACTTTTATTTCA<br>GTCCGTCCAAGAGTTTATGAATGCATAAAAGTTCA<br>CAGATTCTTGAGCCATTGCTCTGAATTCA | T         | G       | GATAGAAAATCCACCACTGGATATTGTGCCTAT<br>GTTTGAGGAAATTTAGTACTTGGAGAAGTAAG<br>AAACAAGGGGTTGTTGCCGAAGCAGTGCAGA<br>AG                                                                                                                                                                                        | NA                         | NA                          | 160 |
| Ca-II-SNP902 | 186.06                 | Ca- <i>desi</i> -LG(Chr)5 | 11629355                | CACTTGCCACCACGAAACCCACATGTGCAGTTCT<br>CTCTGGCTACCGTTTTCGAGCGCCGACCAGATCA<br>GGTGCCCTCTGCCACATTCTGAGGTGTTTAC  | C         | T       | ATTTTACTCGAAGAAATAGAGAAAACATATATGA<br>GACGTGTATGAGAAAATACTACATAATTTCTCA<br>TTTCTGCTGTCAAACCTAGCTTCTTTGCTTAACTC<br>TTAGTAGTCTCCTCTGAACATCGAAACAGGTAG<br>CCCTGGTTTTCCGGACTCTAAAACCTTCGTTT<br>TCCC GCCATACACCTCAACGGCCAAACCCCTA<br>GCTTCCACGAATACACCGTGCAACCTCCATTAT<br>CTACATTTCAATCTTAAACCGTAATTCCTTAC | NA                         | NA                          | 208 |
| Ca-II-SNP903 | 187.05                 | Ca- <i>desi</i> -LG(Chr)5 | 11842074                | GAAATAGAGACTGAGTCTATTAGAAGTCAAGAAA<br>CTGGGAGTAAGTTGTTAATTCATCGTTGTTCATT<br>AATTGAGGATGGTTATTGTAACCTGTTTTT   | A         | G       | TCAATGTTAATGTGCAAAATTTTCAAATAAAAAATC<br>TTAATTTAATATTTTTAATCTTAATTAATGAAAAAT<br>AAAAAATAGTATTTTTTAAATAAATAAAAA                                                                                                                                                                                        | NA                         | NA                          | 133 |
| Ca-II-SNP904 | 188.04                 | Ca- <i>desi</i> -LG(Chr)5 | 11915491                | AAAACCAATATGTAGTTACGTCCAATCACTTCCAT<br>TTTGTTAAATATATTTAATATCTATGTGACTGTGT<br>CTATGTTGTGTTTCGATGCTACGTCAATG  | C         | T       | GTAGTATAATTTAATTAAGGCAAAAAAATTCATG<br>AAGTTCCTCAGCAATGGGTATGTGCAGAAAAG<br>CATCTCTTGCTTTGAAACTCACCACATAACTA<br>A                                                                                                                                                                                       | NA                         | NA                          | 105 |

| Marker IDs   | Genetic positions (cM) | Chromosomes               | Physical positions (bp) | Flanking sequences/Forward primers                                                                           | ICC 12968 | ICC4958 | Flanking sequences/Reverse primers                                                                                                                            | Annealing temperature (0C) | Amplified Product size (bp) |     |
|--------------|------------------------|---------------------------|-------------------------|--------------------------------------------------------------------------------------------------------------|-----------|---------|---------------------------------------------------------------------------------------------------------------------------------------------------------------|----------------------------|-----------------------------|-----|
| Ca-II-SNP905 | 189.03                 | Ca- <i>desi</i> -LG(Chr)5 | 11926984                | TGTGGTTGCTAAAGTAGTGTAAAAACAATTA<br>AAAAGTGCACTGGTGGGTGAATTGAACGTATTT<br>TGCTGTATTCTTTTCTTTTAAAGTGAC          | T         | C       | GCGTCAGTTGAAAAGTTAGTGGCCAATTA<br>ATAAAAAGAATTAATTAATAATAACTACTACA<br>CCACTACTACGTTCCACCGTTGAGAATTTAGT                                                         | NA                         | NA                          | 184 |
| Ca-II-SNP906 | 190.02                 | Ca- <i>desi</i> -LG(Chr)5 | 11993105                | TATCCCTTGGTTATTTAATCTAACGGCATCCACA<br>TTGATCATAACCATGTACTCCAGAAAATATATT<br>CGCTAAGTCCCAAAGGATGCAGGGTTTTTC    | A         | G       | CCTTCAAACCTATGTTTCTCATTTTAAAGTCAGT<br>AATCAATCACCCGTGAAAAAGGACGCATTTTATT<br>AGGTACAACCTGGTTGACTACTCTCATCAAC                                                   | NA                         | NA                          | 143 |
| Ca-II-SNP907 | 191.01                 | Ca- <i>desi</i> -LG(Chr)5 | 12035418                | GAGGTTTATCATATCCTCTCAATTTCTTGATATAG<br>GCAAAAAATCATATCAAGCTCGATTGAGTCTTT<br>CAATTCTCGTGATATCATCAGAGATTTTA    | C         | T       | TGAAAAAATACTCGGTTGCTACGCCTAGCA<br>GCAATCATATCAACATTTTGTAAATATCTGCTT<br>GTGATCTATTGACAACCAACCCAGGGATACT<br>TTAACCTATAAGCTCTCCCCTCCAGCATTTCAA<br>CAGCATCAGTACCC | NA                         | NA                          | 140 |
| Ca-II-SNP908 | 192.00                 | Ca- <i>desi</i> -LG(Chr)5 | 12052770                | AAGTTTATACTATTAATAATAAGTCTTATGAGTTGT<br>TTGCAGATTTTTTAAATTATATTAACATTTATTTTAC<br>CCCATCAGATGTTATTTTAAATCTG   | A         | G       | TAAATTTTTTAGTCCGATTGCAAGGTCTAAATA<br>TAAATAGTAAGTATGAATCATAGTTCTAATACTT<br>TAGAAATTTATTTTCTATATTTTGTGCT                                                       | NA                         | NA                          | 156 |
| Ca-II-SNP909 | 192.99                 | Ca- <i>desi</i> -LG(Chr)5 | 12117536                | GAGGTTTATCATATCCTCTCAATTTCTTGATATAG<br>GCAAAAAATCATATCAAGCTCGATTGAGTCTTT<br>CAATTCTCGTGATATCATCAGAGATTTTA    | T         | C       | ATTGTGAAACTCAATGGATATGTATAAGAATTG<br>ACAGACCAAATGTGAGTTTATGGTTGATGACC<br>CTAAAGTAGATTGCATATGAAATTATTCTTACT                                                    | NA                         | NA                          | 146 |
| Ca-II-SNP910 | 193.98                 | Ca- <i>desi</i> -LG(Chr)5 | 12150221                | CAAAAGAGAGAATGCATGATGTTTGATCAGGGAG<br>TTCAGTTAATTGTGTCAAAGTCTCCGCCTGTAGAG<br>TGGCTGCAATACCTTTGTATAATGATTCAAG | A         | T       | TATGGCTCATAGTAAAGTATAAATGGATAAGTC<br>GCTTGAGCTTAAATGTTGTAAATCTGGACCGTAG<br>TATTTAAATACAAGTTGTACACTGTAATCCTAA                                                  | NA                         | NA                          | 138 |
| Ca-II-SNP911 | 194.97                 | Ca- <i>desi</i> -LG(Chr)5 | 12171539                | TTCTCTTTGTTTCTCTTATACCAAATAACTTCA<br>AATCTATTTTTTTTCTTTTCATATTTTCTATCTTA<br>TCACACTCTCTCAATTTCTCTCT          | C         | T       | CCAATATGTGGCCGGAGCCAATAATTAGAGG<br>GTTTGTCAAATAAATGGACAACACTATTCTTTTC<br>TTTTCAAGTGTGATCGGTTGTAAGAGAAATTG<br>G                                                | NA                         | NA                          | 151 |
| Ca-II-SSR294 | 195.96                 | Ca- <i>desi</i> -LG(Chr)5 | 12287423                | CAATATAATTGTGGAGGATGATAGTTT                                                                                  | (AT)20    | (AT)15  | GTCACCTATGCCAAATCGGA                                                                                                                                          | 58.06                      | 112.00                      | 177 |

| Marker IDs   | Genetic positions (cM) | Chromosomes               | Physical positions (bp) | Flanking sequences/Forward primers                                                                               | ICC 12968 | ICC4958 | Flanking sequences/Reverse primers                                                                                                                                          | Annealing temperature (0C) | Amplified Product size (bp) |     |
|--------------|------------------------|---------------------------|-------------------------|------------------------------------------------------------------------------------------------------------------|-----------|---------|-----------------------------------------------------------------------------------------------------------------------------------------------------------------------------|----------------------------|-----------------------------|-----|
| Ca-II-SNP912 | 196.95                 | Ca- <i>desi</i> -LG(Chr)5 | 12294571                | TCTTTATATTACTTTATTCTTCTACTTTCTCTCT<br>CTTCTCTGCCACCTGACTTTATCTCAAGACGAAAA<br>TCTGAGTAATATTCTGAACATTCATGAA        | A         | C       | TCTTCTTCTTCTATATTTTGTCAAACCTCATT<br>TGTAGTTGCATCATAGCTACTTATGTATGTGGG<br>AGCTATTAATATTTTAATAATATTTGTTGTGAT                                                                  | NA                         | NA                          | 157 |
| Ca-II-SNP913 | 198.93                 | Ca- <i>desi</i> -LG(Chr)5 | 12433033                | CCACCAATGCCTAGACCTCTTCCTGTTTTGATGGA<br>TGGGATTACATTACCATGGTTGCAATGGGAGACA<br>AACAAATAGCCCTTCTTCTCCTATGACAAACC    | C         | A       | AAAATAGCACAGAAAATGATAATGATGATGGAA<br>GGGGTAAAACATGCGCACATTAGAACAATTG<br>TAGACACATGTTGCATAACATCCCGTATGTATC<br>AAAATGATGTAGATTTTTTAAACATTGATCCTAT<br>GTTCGAAGAGGTGTTGGGTACAGG | NA                         | NA                          | 126 |
| Ca-II-SNP914 | 199.92                 | Ca- <i>desi</i> -LG(Chr)5 | 12466514                | GTTGAAATCCTATTCAAATCAAACCTAAGGATTCTT<br>GTGGTTCTGGAGGATCCAATTACAGGAGAACCGG<br>GAACGAAGAGCTTCTCCCCCCTTTTTACG      | T         | C       | CACATTAGTTATTTGCTCTCAGCTTGAACAGTT<br>AAAGGTCGGAGAAAGTGAATTAATCATTCTTAA<br>CTTAAAACCCACATTCTTAAGACTAAGAGTCT<br>G                                                             | NA                         | NA                          | 210 |
| Ca-II-SSR295 | 200.91                 | Ca- <i>desi</i> -LG(Chr)5 | 12483205                | TGGAACAGGTTTTCTAGCTGC                                                                                            | (CA)8     | (CA)9   | AACGATTGGTGCTCCAGACT                                                                                                                                                        | 59.51                      | 124.00                      | 147 |
| Ca-II-SNP915 | 201.90                 | Ca- <i>desi</i> -LG(Chr)5 | 12510260                | CCACCAATGCCTAGACCTCTTCCTGTTTTGATGGA<br>TGGGATTACATTACCATGGTTGCAATGGGAGACA<br>AACAAATAGCCCTTCTTCTCCTATGACAAACC    | A         | T       | ACAAATGCCTTTCTTTGTAACAATTAATAGT<br>TCAGTGATAACCTGAGTGGAACTTCCAGTTGCA<br>CTATTCGGAGTCGATGTCAAAGTGTCTTATTC                                                                    | NA                         | NA                          | 101 |
| Ca-II-SNP916 | 202.89                 | Ca- <i>desi</i> -LG(Chr)5 | 12520180                | AGGAGATGAAAAATTGGAATTTTCTTCTTCC<br>TTTCTTTTCTTCTTCTTCTTCTTCTTCTTCTTCTT<br>TTCTTCTTCTTCTTCTTCTTCTTCTTCTTCTTCTTCTT | C         | T       | TTTAACAAATATCTAGATTTTGTAGATATTTGTTA<br>AGTTATATTTATATATGTTTGTGGAGGGAAAA<br>AGAAAGGAAAAGTGAAGGAAGGAAAAGGAAA                                                                  | NA                         | NA                          | 217 |
| Ca-II-SSR296 | 204.87                 | Ca- <i>desi</i> -LG(Chr)5 | 12567943                | AAATAGTCGTAGAGAAAGGATGCAA                                                                                        | (AT)10    | (AT)11  | TTCTAAAATTGAGGAATATGACAAAA                                                                                                                                                  | 59.73                      | 208.00                      | 148 |
| Ca-II-SNP917 | 205.86                 | Ca- <i>desi</i> -LG(Chr)5 | 12619537                | TTTGTATCTATCAGCTCTGCACCTACTACGGGACC<br>CACGATGTGGTGTGCAGAAGAGCCAACCTCAACC<br>ATCACACCGACAAGACGTAATAGACCTCGC      | T         | C       | TGCTTGGTGGTTCAAATGTTGTTGTGTTGGG<br>GTGAAAGAAAATGAATGACGATGTGGTTATGGC<br>GCTTCATTTTCAATAGAAACAGGGTGAGTCTGT<br>A                                                              | NA                         | NA                          | 154 |

| Marker IDs   | Genetic positions (cM) | Chromosomes      | Physical positions (bp) | Flanking sequences/Forward primers                                                                           | ICC 12968 | ICC4958 | Flanking sequences/Reverse primers                                                                                                                                                                                                                                                                    | Annealing temperature (0C) | Amplified Product size (bp) |     |
|--------------|------------------------|------------------|-------------------------|--------------------------------------------------------------------------------------------------------------|-----------|---------|-------------------------------------------------------------------------------------------------------------------------------------------------------------------------------------------------------------------------------------------------------------------------------------------------------|----------------------------|-----------------------------|-----|
| Ca-II-SNP918 | 207.84                 | Ca-desi-LG(Chr)5 | 12688787                | TCTTAGATTTTAAATTTATTTTTTAAATAAATTTT<br>ATTTTTATTTTTATTTTTTTGTTATTTTCTTAGTTG<br>TTTACTCTTGTGTTCTTGGCTCATA     | A         | C       | CTATTGTACTTTATTAACCAATAATGTTTACATT<br>ATTAAGTAGAAAAAGAAATACAAAAAATAAAC<br>CAGAAAACTGTGATAAGCCAAGAAAACCGTT                                                                                                                                                                                             | NA                         | NA                          | 163 |
| Ca-II-SSR297 | 208.83                 | Ca-desi-LG(Chr)5 | 12944505                | CGGAGGTGGTTCTTGATGAT                                                                                         | (GTT)5    | (GTT)6  | GTGATGATCCTCCTCTTCGC                                                                                                                                                                                                                                                                                  | 59.93                      | 168.00                      | 209 |
| Ca-II-SNP919 | 209.82                 | Ca-desi-LG(Chr)5 | 12950426                | ACTGAAGGGTAAGAACGAAGCATGAGTCTCTTT<br>TATTTTCTCCAAGTAGCCGAATGCTTTCTAACAA<br>TAATGCTCTGACCAGGATCAAGGTTGTCCAA   | G         | A       | AAAACCTAACTAAACCCTCACTCCCAATTTTCATT<br>CATCACCAAAACCTCACAAACAAAATAAAAAAAT<br>TTTTTTCTTCAACTGAAATAAAAACAAAGAGAAA<br>AAAATCCGAACAACAATGGCTCCGAACCTGGAA<br>TGTCGCATGTACGAGGCAAGGTACCCAGAGGT<br>AGACATGGCAGTAATGATACAAGTGAAGAACAT<br>CGCCGACATGGGTGCTTACGTGTCACCTTCTCG<br>AATACATAACATCCACCTATCATTCTTCTCT | NA                         | NA                          | 175 |
| Ca-II-SNP920 | 211.98                 | Ca-desi-LG(Chr)5 | 13042726                | CGTCTTATATTTGGTATTTATCTCTCTCTTTAGT<br>ATTCTTAAAAGTCTTAAACTATGTTTGGATTTGGT<br>CACCACCTTAAATTGAGTTTTCTAGCA     | A         | C       | TGTCATTCGAAACTTTTGAATATTCAGAAAAATT<br>TGCCAAGTTAAAAGATTAATAATTGATTTTTATA<br>TGGATTGGGGTGGCAGTTTTATGTAGGGGTGC                                                                                                                                                                                          | NA                         | NA                          | 189 |
| Ca-II-SNP921 | 213.15                 | Ca-desi-LG(Chr)5 | 13086919                | ACTGAAGGGTAAGAACGAAGCATGAGTCTCTTT<br>TATTTTCTCCAAGTAGCCGAATGCTTTCTAACAA<br>TAATGCTCTGACCAGGATCAAGGTTGTCCAA   | C         | A       | CATCTAATGTGTGCCTAAGGTTGTTTCGAAACA<br>GAACAAAGGATCCAAGAACACATAATGCCAT<br>CATGTGATGAGGTTGCTGCTTAAATAGTTGGTG<br>A                                                                                                                                                                                        | NA                         | NA                          | 145 |
| Ca-II-SNP922 | 214.32                 | Ca-desi-LG(Chr)5 | 13163827                | TGCTCTGTAGTACGCAACATTTTCAGATGTTTGGT<br>TTGCAGTCCATCAAACATCTGTGACATTGAAGATA<br>TAGACTCATCCATATCTCGTTTACAAATGT | T         | C       | ATTTGTTACTTATTATATTATTACGATAAT<br>ATTCTTATTTAATTATTTGATTTTTTAAATTAT<br>TTACAGACATGGATTTATGAGCATTTCCT                                                                                                                                                                                                  | NA                         | NA                          | 162 |
| Ca-II-SNP923 | 215.49                 | Ca-desi-LG(Chr)5 | 13175432                | ACTGAAGGGTAAGAACGAAGCATGAGTCTCTTT<br>TATTTTCTCCAAGTAGCCGAATGCTTTCTAACAA<br>TAATGCTCTGACCAGGATCAAGGTTGTCCAA   | C         | T       | TTGCAAGATGGTAGAAATGCTCCTGTGAGGAACA<br>TGATAAAGCAGCTGCGAAGAGCCAATTTATCAC<br>ACACACAATAGGCAGGCGATTGGCAGAAATGG<br>ATGTCAAACCCACCCTATTGACACTAAGGGCT<br>TTCAGGCACCTG                                                                                                                                       | NA                         | NA                          | 112 |
| Ca-II-SNP924 | 216.66                 | Ca-desi-LG(Chr)5 | 13648236                | CATGTTCAATTCCATTCTGACACAAAATCCTTGA<br>ATTCATAGGATGTATATCTCCTCCTCCATCTATC<br>CTTAGCACGTTGACAACCTTCCACTTTAA    | T         | C       | TAAGTATTCATAACCTTTGTTGATGAATTAAGT<br>AGAATGTTATGGATTTATTTGATTAACCAAG<br>ATGAGGCATTGGACAAATTCAGAACCTCAAG                                                                                                                                                                                               | NA                         | NA                          | 160 |

| Marker IDs   | Genetic positions (cM) | Chromosomes      | Physical positions (bp) | Flanking sequences/Forward primers                                                                            | ICC 12968 | ICC4958 | Flanking sequences/Reverse primers                                                                                                                               | Annealing temperature (0C) | Amplified Product size (bp) |     |
|--------------|------------------------|------------------|-------------------------|---------------------------------------------------------------------------------------------------------------|-----------|---------|------------------------------------------------------------------------------------------------------------------------------------------------------------------|----------------------------|-----------------------------|-----|
| Ca-II-SNP925 | 217.83                 | Ca-desi-LG(Chr)5 | 13652905                | TTGATGCAAATGGATTACACCTTCCAAAACCATCTC<br>AGATTTTCATGGCTTGGTAGATTTTCTCCCATGCTC<br>TTTGAAATCTATCCAAGACTCATTAGAGC | G         | A       | GTGTTCTGTGTTTGTATTAAATTAATCTTGA<br>TCCTGTTTGATTATTGGTACTTGAAAGCCTGC<br>TTGGCGTAATAAATCATTGTTCTTCTCCTTT<br>TTCTGTTTTCCCCCTATGCAGTAATCACTCGAG<br>TATCATGCTTTTGAACC | NA                         | NA                          | 139 |
| Ca-II-SSR298 | 219.00                 | Ca-desi-LG(Chr)5 | 13691148                | AATTGGTTGCTAAGCCGTGT                                                                                          | (TAA)9    | (TAA)10 | TGGGGAGAAATAAAATGGGA                                                                                                                                             | 59.64                      | 182.00                      | 192 |
| Ca-II-SNP926 | 220.17                 | Ca-desi-LG(Chr)5 | 13702262                | GGTGGTTGTTTCTAGATTAACCTGTTCTACAATT<br>ATAACTTCTCGGTATTTATTGAACCACCAAGTGT<br>TGCTTTTATCATCAGTTTGTGAGCATAGT     | G         | T       | AAACGTCTACATATAGCACACATAACCTAAAAAT<br>GAATACACAAAAACTTCAAGTGTATAAAATATAA<br>TTACATCGAGTAAATTTTGTGAGAAAAATC                                                       | NA                         | NA                          | 131 |
| Ca-II-SNP927 | 221.34                 | Ca-desi-LG(Chr)5 | 13715122                | ATTTAATGGTTGGATATATATTTTCTTGGTATAAAT<br>AGTTAGAAAGTCTACATCTTGGTCTGCTCCACCA<br>CCAACCTGTTTTACCTTCTCCCTTGAAT    | A         | C       | AGAAGGATTAATTTTTGGTTATGCTTATGAATTA<br>ATTGTCTCACAATCACAACCAACTCTATAGGTA<br>TTTTTCTAAAGTAAATGGTAGTGAGAGAAAA                                                       | NA                         | NA                          | 172 |
| Ca-II-SNP928 | 222.51                 | Ca-desi-LG(Chr)5 | 13739071                | CCTTGTTATACACCTTGAAAAAGATAGTGGCTGTT<br>GTATCTGGTATTTACTGAATTTTTATGTTTTCTCA<br>AATTAAGTCCCTTTCTCTTTTGCAGGC     | C         | T       | GGGAAAAGAGCTCCTGTGAATAAGGTACAACCT<br>ATTGGGAAAAAGAGTAAAAAAGACCA<br>AACATACCAAGTAGCTTCAAGTGTGAGTAAAT<br>GT                                                        | NA                         | NA                          | 134 |
| Ca-II-SNP929 | 224.85                 | Ca-desi-LG(Chr)5 | 13768754                | GAATGTTGTGTTGCCTATGAATCCATGTTTATGT<br>TGTGTTGAACAAATCTTTAAATTATCATCTTATTAT<br>CATGATGTTTATGATGTTGTTAAATCAT    | A         | G       | AAAGATAAAATGTTTATGCTCCCTCAATCAT<br>ATGTGTAATAATTTTTAAACTAAAAATCATTAC<br>TCCCTAAATGATGCCAAAGTGTGAAATAA                                                            | NA                         | NA                          | 198 |
| Ca-II-SNP930 | 226.02                 | Ca-desi-LG(Chr)5 | 13790950                | CTCAAATTTGGGTGATCATGAGTTGAGTTGTATAA<br>TCTCCATTTTAGATGATTATGAGAGACTTATGGT<br>ATCCCAACCATGCTCTAGTGAGAGGAGGG    | C         | T       | AACCCAACTAATATGTGATCACCTACAATA<br>TTATCTCACATCTAAGAGTTACAAGGATGATAA<br>CACTCACATCTCACAACAACAAATAATCACCCA<br>C                                                    | NA                         | NA                          | 126 |
| Ca-II-SNP931 | 227.19                 | Ca-desi-LG(Chr)5 | 13824239                | AATCTTAATTTATGACAGATTTTATTCAACAGCTCT<br>TTCATGACAGTTGGTCCCTTTCCAACGGCCACAT<br>GAGCTGTCCCTAAGTCTTCTGGAGTCTATA  | G         | A       | AACTATAAGAAAGATTTTGGAGACTTGAGTAT<br>GATCGAAAAGATTGATCTTTTGTGGTGCTAA<br>TTGTTGTGTTTTGTCTCAACTTGCAGCTGCA<br>T                                                      | NA                         | NA                          | 138 |

| Marker IDs   | Genetic positions (cM) | Chromosomes      | Physical positions (bp) | Flanking sequences/Forward primers                                                                                 | ICC 12968 | ICC4958 | Flanking sequences/Reverse primers                                                                              | Annealing temperature (0C) | Amplified Product size (bp) |     |
|--------------|------------------------|------------------|-------------------------|--------------------------------------------------------------------------------------------------------------------|-----------|---------|-----------------------------------------------------------------------------------------------------------------|----------------------------|-----------------------------|-----|
| Ca-II-SNP932 | 228.36                 | Ca-desi-LG(Chr)5 | 13913861                | ATTTATATTTATTTTTGTCTTTCATTTCATTTTCT<br>CACATGTTCCATCTAGTGAACAACAAGGGGC<br>GTATTGATACTCAATCAATCTTACTTTG             | T         | A       | AGAGGCATCAATTTTGGGAATTTGAAGATTT<br>AATGAAAGCCAAAATAAAATTTAAAATTTAAAAT<br>GAAAACAATAAGTTTATCATGTCTTGTAAACC       | NA                         | NA                          | 204 |
| Ca-II-SNP933 | 229.53                 | Ca-desi-LG(Chr)5 | 14047868                | TTTACAATTATGGTTTATTTTTATAACTAGCATTT<br>TCATCTTGTTAAGCTTCTATGATCAGGAGCATCT<br>TTTTTGTTTGTGGCTCAGAGCAAGAAGC          | C         | A       | AGGCAGAAGCTATTGAAAGTAAACACTTTGACC<br>AAAACTTAAAAAACGTGCATAATACAATCAAC<br>AAAATACTCATAGAACTTAACCTTACATTATA       | NA                         | NA                          | 201 |
| Ca-II-SNP934 | 230.70                 | Ca-desi-LG(Chr)5 | 14048205                | TTTTTTAAACTCGAGTTTGTGTTTATGAACCAAT<br>GAATAATTTCTAATTTCTATGTTTGTATGGTTATGT<br>GTATATGATATTGTGTGTTTGTATGGTA         | C         | T       | CATTTTCAACAGAAAATAAAATATCAACATACA<br>GTTATTTAGAAAGATAACTTTCTTGTGGCACC<br>AGTATGCACTTTATGAGATACTGTGATATATGC      | NA                         | NA                          | 205 |
| Ca-II-SNP935 | 231.87                 | Ca-desi-LG(Chr)5 | 14063987                | TTGATGCAAATGGATTACCTTCCAAAACCATCTC<br>AGATTTTCATGGCTTGGTAGATTTTCTCCCATGCTC<br>TTTGAAATCTATCCAAGACTCATTAGAGC        | A         | C       | GTCCTGATAGCCTGGAGAATCCCTAAAAGTCA<br>TGGAAATTTTCTCCCTTTAACTTCAGACTCAAA<br>TCCAAGTCTGTGAGTGTGAAGTTTGAGTAGAA       | NA                         | NA                          | 149 |
| Ca-II-SNP936 | 233.04                 | Ca-desi-LG(Chr)5 | 14087402                | GTTTCAGTGATTTGGGATGTTATTAGGTTAGATCT<br>TCAAGTCCATTTAAAAAGATGCAGTGTGATGTA<br>AATAGTTTACACAGTCGGCAAATCATGAC          | C         | T       | ATAAATGAATTTAATTTATATACACTGTCAATTA<br>TAACCGTTACATCATTAGCAATGTTGATTTCTG<br>ACAAAACACTTATAAAGTCACCCACATGATT      | NA                         | NA                          | 143 |
| Ca-II-SNP937 | 234.21                 | Ca-desi-LG(Chr)5 | 14100567                | ACAATGTGACCAATGGTCTCCAGGAAATCCAC<br>GTTGTTGGACTTGTCTTCAACTGTGGCTCCTCA<br>GCTTTCTCATAGTACATTTGATCAGACTCCT           | G         | A       | ACCCATTGCATCTCATAGACAATGAATGGAGC<br>TAACCATCCACCTCATCAACATCGTCGTAGGCG<br>TAGTTTCAGGTCTCACGAACCTGATGAAGATGT<br>T | NA                         | NA                          | 147 |
| Ca-II-SNP938 | 235.38                 | Ca-desi-LG(Chr)5 | 14165429                | AAATCAGTATTAGAAAAATATCGATTGCGCATTG<br>TTAACCGTTGGATCGGGTTGATTTTTGGACAGCAA<br>GTTTCGCAACATTCAGATCCACGTTTTCAAC       | A         | G       | TCTAGAATTATGCTTCACAAATTTGTTCTCACT<br>CATTTTACACCTGCTGCTGTGCACGCACGGTTT<br>CTCCCTCTCTGAATGTCATTTGCTGATCAGAC      | NA                         | NA                          | 157 |
| Ca-II-SNP939 | 238.89                 | Ca-desi-LG(Chr)5 | 14222770                | GCACGCACGCACGCACGCACGCACGCACGCACGC<br>CACGCACGCACGCACGCACGCACGCACGCACGC<br>ACGCACCCACGCACGCACGCACGCACGCACGCAC<br>C | G         | A       | CCTAATTTGCACTTTAAGTGCTTGAACATTACA<br>CTCCTAATGTGTGTGTGTGCGTGCGTGGGT<br>GCGTGGGTGTGTGTGCGTGTGTGCGTGTGCGT<br>CGTG | NA                         | NA                          | 171 |

| Marker IDs   | Genetic positions (cM) | Chromosomes      | Physical positions (bp) | Flanking sequences/Forward primers                                                                  | ICC 12968 | ICC4958 | Flanking sequences/Reverse primers                                                                | Annealing temperature (0C) | Amplified Product size (bp) |     |
|--------------|------------------------|------------------|-------------------------|-----------------------------------------------------------------------------------------------------|-----------|---------|---------------------------------------------------------------------------------------------------|----------------------------|-----------------------------|-----|
| Ca-II-SNP940 | 240.06                 | Ca-desi-LG(Chr)5 | 14259428                | TGAGTGAAATCAATGTTTTATGATTACTTGTATGTTGAGTTTTAAGTCATTAGATTACTCATGTCTAATGGCTTAAAGTATTTGAAAGATTTGTGGCTA | G         | A       | TGCCAGTATGCTAAACATAGAAAATCCTCTCGGCAAACATACTTCAATTTAATAATAACTATTTCTCGTAGGCTATATTCAAATACCTCTTCTACCT | NA                         | NA                          | 181 |
| Ca-II-SNP941 | 241.23                 | Ca-desi-LG(Chr)5 | 14270809                | CAAATCCATGATATCAGGTATTTTAATTTGAGAAAGTGATTTGAGGCTCTAATAAATTGTCATTTGTGATCCTCTTGAGTTTGATTATTCAGTTGCTCT | C         | G       | GAAGTTTTGAATTTCTATCCCGGGTCTTTTGTAGTCTTTAATAGAAAAAATGTTTGAAACTTATTAGAGCCTCAAATCACTTGAATAATTAATTA   | NA                         | NA                          | 192 |
| Ca-II-SNP942 | 242.40                 | Ca-desi-LG(Chr)5 | 14297283                | GATTTTGTAAATCAGTCTCAGAAAAACATCGATTGCGCATTGCTTAACCGTTGGATCGGGCTAATTTTTGGACAGCAGGTTCCGAACATTTAGGTCTTC | G         | A       | ACACAATCACTGAGACAAAGTAAATTAGGGATAACCTGGTGTGTGCGAGCAGATTCTCCCTCTCCAAATGTCGTTTCGTCGATCCGACCGTTGACGA | NA                         | NA                          | 174 |
| Ca-II-SNP943 | 243.57                 | Ca-desi-LG(Chr)5 | 14322733                | TGGCCCTCTCCTCTCAATCCTGCAACGCATCGTCACTATCAATTAGGGAGCTTACATCAGTTGATAGCCCTCTCCTTACGGATGACATTTCTCATA    | T         | G       | TGGGAAATCGATGTTATTGTTATTAATCGTTAACTGCGTTAGGTGCACCTAGTTACCTCGTGTGATTAAGGAGAGTTACCGTTAGATGGAGCCGCC  | NA                         | NA                          | 141 |
| Ca-II-SNP944 | 244.74                 | Ca-desi-LG(Chr)5 | 14412697                | AATAATGCAAACATGCTATATGTAAGACCCATAATTTTAAAGTGATTTTATGTATTTTGTGATTTTGGATTTTGGCTCAGAGGCTTTTAGCCAAAG    | A         | T       | GTAAGGATTCACCGCAGTTAATTTAATTTATTTATCGACGAGTAATTTCAATCGGCATCAAATATCTTTTGATCATATAAACTCCAAAATATTATTA | NA                         | NA                          | 145 |
| Ca-II-SNP945 | 245.71                 | Ca-desi-LG(Chr)5 | 14425204                | AAAACCTTGTGCTCATGCGAGCGATCCAGAACCTACCAATCATGAAGCTGATGCCACTCATGCAGCTGATGGCGCTGATCCGCCGATGAAGCAGTTGAC | G         | A       | TTTGATTGCTCGATGCTGCAATAAAAAATAAATAAATATGAATAGTTAAAATAAATTAATATGACTAAATAAATATGACTAATTAATATACCGTTA  | NA                         | NA                          | 125 |
| Ca-II-SNP946 | 246.68                 | Ca-desi-LG(Chr)5 | 14463140                | TATATATATTACCTTACAATGTGTATATTTGTAGTGTGTACATATATAAAATATTACAATCCTTTTCTTGTCCTTTTATAACATTTTTTTCACCTTTTT | A         | T       | GGCCCAATGTCGATCCTACTAAATCCATCCTTGTATATAAAACCCAAAAAAGTATATAAATTAATGAAAGTTTCGTAATAAATAATTAACACAAT   | NA                         | NA                          | 100 |
| Ca-II-SNP947 | 247.65                 | Ca-desi-LG(Chr)5 | 14497965                | TTGATTTGTGTTATCATCGTTTTTCTCCTTTGCATTACACTTGCTTGTCTCTTTGTCTTCTGTTCTATTCCTAAAACCTACAGGTGAAGCATTATCCCA | T         | C       | ACCCGACTAAAGACTTCCCATGAGGTAAGGAAACAGTCCCAAGTACCCTGCTTTGTAGAGCACACATCTCATCAAGCATTGCTTGCCTCCACTCAGG | NA                         | NA                          | 103 |

| Marker IDs   | Genetic positions (cM) | Chromosomes      | Physical positions (bp) | Flanking sequences/Forward primers                                                                            | ICC 12968 | ICC4958 | Flanking sequences/Reverse primers                                                                               | Annealing temperature (0C) | Amplified Product size (bp) |     |
|--------------|------------------------|------------------|-------------------------|---------------------------------------------------------------------------------------------------------------|-----------|---------|------------------------------------------------------------------------------------------------------------------|----------------------------|-----------------------------|-----|
| Ca-II-SNP948 | 248.62                 | Ca-desi-LG(Chr)5 | 14640464                | ATTGTGATGAAATGACGGTGAGAAGGAATTAGCA<br>AGAGATGAATGGTTTTAGGGTTTCAGATGGGTTG<br>AGAAAGAAATGTTTTAGGGTTTTAGGTGGGTT  | G         | A       | GAGTTTGAATTTTAGCGACTAACTTTCAGTGC<br>TAACTATTTTTTAATTACATAGTTCTATTTTTCTC<br>ACCACCACACATATCAGTTCCTCTTTCTTTCT      | NA                         | NA                          | 101 |
| Ca-II-SNP949 | 249.59                 | Ca-desi-LG(Chr)5 | 14700126                | AAGCTAGTCCAAAAGACGATTTTCCTTTCGCTCAC<br>ATTGATGTCCTAGTTGATAGCACTGCTCAATATTC<br>TCTTTTCTCCTTCATGGATGGTTTTCTCAGG | A         | G       | TCTTCAATCCAAATGGCATCACTTTGTAACAGA<br>AAGTCCCCCATTGTGTAATGAATGTAGTTTTCT<br>CCATATCTTCGGGAGCCATCTTGATTTGATTAT<br>A | NA                         | NA                          | 216 |
| Ca-II-SNP950 | 250.56                 | Ca-desi-LG(Chr)5 | 14721876                | TCAAATTACCCCTATTGGTTGTCCAGATTTTCT<br>AGAACTTTTGTGCTTGAACATATGCTTCTAGTAA<br>AGGGATAGGAGCAGTTTTAATGCAAGAAGG     | T         | G       | ATTTCTGGACTGCCTGTACCAATGCCATTAATT<br>CCCTCTCATATACTGATTTTCATTTGTGCTCTAG<br>GTGAAAGACCTTTACTCCAAAAGCTAAAGGTT<br>T | NA                         | NA                          | 201 |
| Ca-II-SNP951 | 251.53                 | Ca-desi-LG(Chr)5 | 14749055                | TATCTTATTGACTTTTTTGGTTTTCTATTTATGTTT<br>ACTGAATTGATTAATTATAGTTTACTGAACTTTTT<br>TTTTTCTCCTGATTTATTTGTTTTCTA    | A         | C       | ATAAATAGTAATAAAAAATAACATTAATAATAA<br>TAAAAATATATAGGCCGACCTTTTCAGGCCTAA<br>TAGACAAACCAACAAACCAGAAAAACCATTAAA      | NA                         | NA                          | 168 |
| Ca-II-SNP952 | 254.44                 | Ca-desi-LG(Chr)5 | 14772066                | AATACTAGTCAAGAAAAAGATGGATGCCATATGTA<br>GGGATGGGAATAGGCTAGGCCGTCCGACAGGGG<br>CCTATGGCCTGGCCTACTTATGGTCTGGCCTG  | G         | A       | TCAGGCCTAATAGGCTTCTTTATAAGCCTGAGC<br>CTGATCTATTTAAATAAATAGACTTTAAAAATAG<br>CCTGAGCCTGGTCTTTTTATTAATAGGCCAGG      | NA                         | NA                          | 142 |
| Ca-II-SNP953 | 255.41                 | Ca-desi-LG(Chr)5 | 14795209                | TTTATACAATCAGTATGCGTCCAAAATATATCTCTC<br>AAAACATCTGAATCTCCCGTCTTGTGTTCAATA<br>CACATAATTTCTTGTGTTAATACTTCA      | G         | A       | GAGAAATAAAGCTAATCTCTCAATTCCTAGTCA<br>AATATATAAAGCAATGAGTACTTATCGAGCTTC<br>ATTGAGAGGTTCTGACACAGAAATGCAGCATGT<br>G | NA                         | NA                          | 218 |
| Ca-II-SNP954 | 256.38                 | Ca-desi-LG(Chr)5 | 14837148                | GGTGGTGGGTTGATTATCGTCCGATGTCGCTTGT<br>TGTTAGTGATCGAGTATGTTAAGGTTAAGGTTAT<br>GGGTTGATGGGAAGAAGTATGATGCCAGATT   | C         | T       | TACAACCTTCTCCTCGTTTTTGTCTATATATTGAA<br>ACAAAAATTCAATAAGAGAGGGGAGAGAAATCA<br>GACGATAAAATTGGGGATAATATCAAAGAAGAA    | NA                         | NA                          | 152 |
| Ca-II-SNP955 | 257.35                 | Ca-desi-LG(Chr)5 | 14883642                | TTTTAAATTTTTCTCAATTCCTTTTATGTCTCTAT<br>AGGTTGATTTATTTATTTTAAATTTAGTCATTTTAT<br>TTATCTCATTAGCCACTTTAACTTTTA    | C         | A       | ACCACATCAAACATTTATGCACACATTAACATCT<br>TAAGGGTCACGTTATACTTTTTAACGAACTTAT<br>AAAAAATAATATTTGGGTAAGTGATTATAAC       | NA                         | NA                          | 102 |



| Marker IDs   | Genetic positions (cM) | Chromosomes      | Physical positions (bp) | Flanking sequences/Forward primers                                                                            | ICC 12968 | ICC4958 | Flanking sequences/Reverse primers                                                                                                                                                                                                                      | Annealing temperature (0C) | Amplified Product size (bp) |
|--------------|------------------------|------------------|-------------------------|---------------------------------------------------------------------------------------------------------------|-----------|---------|---------------------------------------------------------------------------------------------------------------------------------------------------------------------------------------------------------------------------------------------------------|----------------------------|-----------------------------|
| Ca-II-SNP956 | 258.32                 | Ca-desi-LG(Chr)5 | 14900249                | ATAATTTGAAACTGATTTGACTGAGTCTGTTACAG<br>CCTTGCTTAATCAGTTGTCTTCTACTTTAAGGG<br>CCTTTGAAGCTTCTCACTTAATCTTTGATG    | T         | C       | TTCTGCATAATTACAGTAGCGTTCGGTTTACTT<br>CTGCAATGGCTTATAATCTTTCTCAAACATTT<br>TGGCTAGATTCAAGGCTCCAGATCGAAGCTGT<br>A                                                                                                                                          | NA                         | NA                          |
| Ca-II-SNP957 | 259.29                 | Ca-desi-LG(Chr)5 | 15075698                | CCACACTACGGTGTAGTGAACATAATTTGGAAGCT<br>GCGTTGCGAGCGAAGATTTTACCGAATTACTCGC<br>GGTACCGGAAAACACGTTAAAGCTAACGCT   | A         | G       | TTTCCCCAAATCAACTCTCAAACCTAACTAG<br>ATCCTTTCCACACAATCACAGATAAGTCCCTAA<br>ATGCAAACATAAAAGTTTGAAGGAGCCCTTACC<br>T                                                                                                                                          | NA                         | NA                          |
| Ca-II-SNP958 | 260.26                 | Ca-desi-LG(Chr)5 | 15107815                | GTTGACTGGTTGTCATAGTAAACAGATGTTGGTTT<br>GCTAAAAGTAATGTGAAGATCTTTGAAGAGGTAGT<br>GCAACCATTGTATTTACAGGTTAGGTTGG   | T         | C       | ATGTTATGATGTCTTCTCAAGCTCACCTTTAATC<br>TCTTGAAATCAAAGAAACAGTCCAATGTTTCA<br>AGGCTAGTTCTGAGGATGAATATCGCGATTG                                                                                                                                               | NA                         | NA                          |
| Ca-II-SNP959 | 261.23                 | Ca-desi-LG(Chr)5 | 15129853                | TTTGAGCTGAAGTACTAGGCTTGTGAAGAAATG<br>ATGAGTTTTGTATCCGAGGGAGGAGGGATCATGG<br>GTGCAGGGTCAGAGGGAGGAAGAATAATGTTT   | G         | A       | AGAGGAAGAAATGGAAGGTACATTCAAACATA<br>AGCAACTATTTATGTCCTCCACATTGAACCTG<br>AACCAAACCTATTTGTTACCCTCTCCCAACCA<br>A                                                                                                                                           | NA                         | NA                          |
| Ca-II-SNP960 | 262.20                 | Ca-desi-LG(Chr)5 | 15656274                | ATAATTTGAAACTGATTTGACTGAGTCTGTTACAG<br>CCTTGCTTAATCAGTTGTCTTCTACTTTAAGGG<br>CCTTTGAAGCTTCTCACTTAATCTTTGATG    | C         | T       | CTCTAATATCATCTATTTTCATATATAACTTGTAG<br>TGCAGGACAGTGCAATAAATCAATGATTCAAT<br>GCTTTGTAATTTGTTTGCACATGACTTGGGAA<br>CACATTCAAAGTTGGTCACATGATGTGATTTT<br>CAATTTTTTAATTTGCCAAAGGAATTTGAGGA<br>AGTTGGTTTGGCCATATTGACTTCAAGTTGTCC<br>ATTTGAGAAATCACTAATGTCTCCAAG | NA                         | NA                          |
| Ca-II-SNP961 | 1.88                   | Ca-desi-LG(Chr)6 | 566924                  | AGAGATCACACAATGATATATCTGGCTCATCCAA<br>TCTGGGTTACGTCCAGTCTCACAAACCGTGAGAT<br>TTTTCACTAAGTGTCAAAATCGGAGAATGTT   | T         | C       | CCTTTCAAGGCTAAAAGGTGATTGTAATAATCC<br>TTTCTAGGTTGAAAGGTGAAGATTATAACAGAT<br>CAAGGTTGATCTGGACTGGTGGTGTAAAAACC<br>AA                                                                                                                                        |                            | NA                          |
| Ca-II-SNP962 | 2.82                   | Ca-desi-LG(Chr)6 | 593723                  | CTAGTTTCTGAAAACCCACTTGGTTCAAATAATGT<br>TCTTCTTTGGTCTAGGTACTAGATCCCAACATCA<br>TTCTCTTAAATCTTGAGAACCTGCAAAA     | C         | T       | AACATACAGGTGATATCTTTCTTAAATTAATT<br>ATTGTTTGATATTATGTTTATTGTGATAACAAGA<br>AGCTTGATCTTAAAAATTAAGCTAGATAAGT                                                                                                                                               |                            | NA                          |
| Ca-II-SNP963 | 3.76                   | Ca-desi-LG(Chr)6 | 615409                  | GCCTTCGTATTGGTTACCAATGTGTAGATCGACAT<br>GAATAAAAGAATGTTTCATCTTCAGATTGGTGCGTA<br>GATCGGCAAGAATGAAAGGATGATCGTCTT | T         | C       | CTAATTTTCTTATTCTTATTGATCTACGCATTA<br>GTACCAATTGAAAGACGATCATTTATTTTCA<br>TCCATGTCGATTTACACATCGGTAATCAATCA                                                                                                                                                |                            | NA                          |

| Marker IDs   | Genetic positions (cM) | Chromosomes      | Physical positions (bp) | Flanking sequences/Forward primers                                                                           | ICC 12968 | ICC4958 | Flanking sequences/Reverse primers                                                                                                                                                                                                                                                                                                                                                                             | Annealing temperature (0C) | Amplified Product size (bp) |
|--------------|------------------------|------------------|-------------------------|--------------------------------------------------------------------------------------------------------------|-----------|---------|----------------------------------------------------------------------------------------------------------------------------------------------------------------------------------------------------------------------------------------------------------------------------------------------------------------------------------------------------------------------------------------------------------------|----------------------------|-----------------------------|
| Ca-II-SNP964 | 4.70                   | Ca-desi-LG(Chr)6 | 627292                  | ATCCTGATTTGAAGAAATGTGTGATGATGTGGAA<br>CTTAATTTTGACGCTATGAATGACGAAGTTGAACC<br>TGTTATGATTGATTTGACTGATGTGTTAC   | C         | T       | CAGTTTCAGATCTAAAAATCACAAACAATTTC<br>CATTTTCCCTTCCAACATTTCTAGCCATTTC<br>TAATTCATCTCGTGTATCAACATCATGCCGGT                                                                                                                                                                                                                                                                                                        |                            | NA                          |
| Ca-II-SNP965 | 5.64                   | Ca-desi-LG(Chr)6 | 671394                  | GATTGTAGAGTAACTCTTTTGACAATCATTCCAAT<br>GTGCAAGTGAAATGTACAATGCATTCTCTATCA<br>TTTGTTTTTGTGTTTAGAATACCCCCATAC   | T         | C       | ATAGTACAAGCAATCAAAAAACAAGTCAAACAA<br>ATACCTTGCTTGCATCTAGCTGACCCATTACCC<br>CAAAAAATTGTTGAAACAGATGCTTTAGATATC<br>G                                                                                                                                                                                                                                                                                               |                            | NA                          |
| Ca-II-SNP966 | 6.58                   | Ca-desi-LG(Chr)6 | 737931                  | TGATATTTGGACGAAAACGGAAAACTTTTCTGGA<br>ATAGTTATCGATACCAATGGCAAACGATAGGTTG<br>TTGTTGTGTTCCACTTTGGTTTTAGAGCT    | A         | G       | GGTTTTATTTAAAAATAAATAAAGGGACCAATG<br>GGTTTGACCATGGACTCTAATTGTTAATAAAAA<br>AAAACAACCAAAATAAAAAATGGAATTGGATGG<br>G                                                                                                                                                                                                                                                                                               |                            | NA                          |
| Ca-II-SNP967 | 7.52                   | Ca-desi-LG(Chr)6 | 745730                  | TCTATTGTTCCCTTCAATGACAAGGTGCGATGCAT<br>TGGTTTGATATATACGTAGAAAACAAGAGATTATCC<br>TGATGTAAATCTTGCAATTGGGATATAAC | G         | A       | TTATTTGAGATACATAAAATTAAGACTGACAC<br>ACTATTTGTTTACTTACTCCATTGGATAGCAACA<br>TTACCCTTTGTTACCATGCATGGTCTGATTG                                                                                                                                                                                                                                                                                                      |                            | NA                          |
| Ca-II-SNP968 | 8.46                   | Ca-desi-LG(Chr)6 | 749404                  | CATTCTTATACAATATTTTCTATATCTAGATTATT<br>CGCTTTCGTAAAAATACAATGTCTATGTTAATTA<br>TCGCGAAATTTCTCTGTTATGTGCAAT     | A         | G       | CGTTTTCAATTTACAATGAACGATTAACTCTAA<br>ATCTCCTTTAAACTTGTATAAATTTCCATGTCC<br>AATCCAACAACATTATACATCCACATTAATGT                                                                                                                                                                                                                                                                                                     |                            | NA                          |
| Ca-II-SNP969 | 9.40                   | Ca-desi-LG(Chr)6 | 779347                  | AACATCCTCTTGAACCTATTATCATTTGACCTTTTG<br>GTCCCATCAAACCTCCAAGTCTTAGTGGTAAAAGA<br>TATGGTTTTGTATTGTTGATGATTTCTC  | A         | C       | ATTCACTCAACAAGTGTGTTGATTGAAGAGGG<br>TTTCATCTCTGTAGTTATATCTGAAAAGGGTCTT<br>GACTTTGTCAAAGATATTCTAATAGACCAAGCT<br>ATATCATCTATAGTTCTTCTCAGCTTCCACAAA<br>TTGAGAAATCTGTTCAAGTACCTCTTGTGGAA<br>AAGCTCGTGTGATTCTTCTGAGATCACAAATCA<br>AAGATATCCAAGTCAGTTCTTCTGTTGAAA<br>CTCCACATACAAACCTTCTCTCTCTCTCTCTC<br>CTTGTGCGCTATCTACTTTTTGCTGAATACAA<br>GTGCTACTCAACGTGTTAAATTAGTTGCATAG<br>GGAAATGGTGGTTGTGTTACTATTATGGAA<br>T |                            | NA                          |
| Ca-II-SNP970 | 10.34                  | Ca-desi-LG(Chr)6 | 810210                  | ATCATGTTTAAAGCTCTATAACTCCATTTGAAA<br>GTTGTTGATATCTGATCTTAAGACCAGATACCAA<br>CTTTTCAGTTATCATTGCTTATATTT        | C         | T       | CTTGTGCGCTATCTACTTTTTGCTGAATACAA<br>GTGCTACTCAACGTGTTAAATTAGTTGCATAG<br>GGAAATGGTGGTTGTGTTACTATTATGGAA<br>T                                                                                                                                                                                                                                                                                                    |                            | NA                          |
| Ca-II-SNP971 | 11.28                  | Ca-desi-LG(Chr)6 | 829507                  | CTAGCCCTGCCTTTATTACTAAGATAAAAAGT<br>AAATCTCATTCAATCTTCAATTTTTTACTTTTTAC<br>CGAATTCTCGTTCGGATCTTAGTTTTTCG     | G         | A       | AAAGTCCACTTTCAAACATTACATGAACATTTCA<br>GAAAAACAACATTATAAGAAAGAAAATGCTCAT<br>CTGACATTTTTTTCCGCATCTCAAATACATTA                                                                                                                                                                                                                                                                                                    |                            | NA                          |

| Marker IDs   | Genetic positions (cM) | Chromosomes      | Physical positions (bp) | Flanking sequences/Forward primers                                                                            | ICC 12968 | ICC4958 | Flanking sequences/Reverse primers                                                                               | Annealing temperature (0C) | Amplified Product size (bp) |
|--------------|------------------------|------------------|-------------------------|---------------------------------------------------------------------------------------------------------------|-----------|---------|------------------------------------------------------------------------------------------------------------------|----------------------------|-----------------------------|
| Ca-II-SNP972 | 13.16                  | Ca-desi-LG(Chr)6 | 839044                  | TAATTTGACTATTTTGGTTTTATAAACTCGTATCT<br>GTTGCCATGGCCTAGATCAACCTCTAAAATATCAT<br>AATGCCTTGCTCTATAATTTTATATATGG   | C         | T       | AACTATATGTCAACTTAAATAATTTTACCTAAAA<br>GATACTCACACTTGTCACTTTTGACGGTGTAA<br>TTTTTTCAGTTGAAAACATAATATAAAAACAAT      |                            | NA                          |
| Ca-II-SNP973 | 14.10                  | Ca-desi-LG(Chr)6 | 880921                  | TCACGTTTCCCGTTTTAGTACTACGTTCCCCACTTT<br>CCCTCTCACTTAATACTACGTTCTCCATTTACCCA<br>TTTAATGTACGACTCCACTTAATATCAC   | A         | G       | TTTTCTATCAAAATGGTCTCCCTCTCCTTCTCTC<br>CTAAACCTTCCCTCTATATCCTAGATGGAATG<br>CGTCCGTTTTGTTTTATTCAATTTTATGGGTAA      |                            | NA                          |
| Ca-II-SNP974 | 15.04                  | Ca-desi-LG(Chr)6 | 907028                  | AACATCCTCTTGAACCTTATTCATATTGACCTTTTTG<br>GTCCCATCAAACTCCAAGTCTTAGTGGTAAAAGA<br>TATGGTTTTGTTATTGTTGATGATTTCTC  | C         | T       | CAATTTTTGATCCTTTTTCGTTTTGAATCTTTTT<br>GCAAAAATGGTGGAACGCCTCAAAGGCTTCAT<br>CTTTATGTTTTAAAAATAAACTCAAGTAAAATG      |                            | NA                          |
| Ca-II-SNP975 | 15.98                  | Ca-desi-LG(Chr)6 | 1324148                 | TTGAAATTGTTAGGTTTAAAGCTGTCACCATTGTT<br>TCAGCATATGGTTTCTCTCTACTACCATTATGTC<br>ATATGAAAAGTTGTTGACTTTACATAGTC    | G         | T       | ACACTGCTCAACTGATATTCACAGGTACAACAA<br>TTCTCGGTGCTATAAAAAATACAGTTGACAAGG<br>ACACCAACATAATCTACAAGGAGTATCCAGATC<br>T |                            | NA                          |
| Ca-II-SNP976 | 16.92                  | Ca-desi-LG(Chr)6 | 1336769                 | CTTGTTATTACTTGAACCTTATGCAATTTCCCTGAG<br>CATTGACCTTTCTTTATAAGCGTTTTAGAGCAATT<br>AATAATGGTCAAAAGAGTTGTTGGTAGTG  | T         | C       | CAAGAACGAAGAAAAATGCACAGTCAAACATAT<br>TTCATAAACTGTTCAAAGGCTGAAATATTTTTAT<br>TCGTATATATTGATTTGGTGAAAACCTGACAGA     |                            | NA                          |
| Ca-II-SNP977 | 17.86                  | Ca-desi-LG(Chr)6 | 1350303                 | CATCCACCGGCCATTCTTTATGACTTGTATATGA<br>TTAGAACAACCATTTATCAACAAATCAGAATTGGGA<br>CGAAGAATGTTCTTCTGTTTGTGGTAGCCAT | T         | C       | GTTGATGAATGTTGGGCTGGAAAAGAAGGAAA<br>ACAAAAGAAAGAAGAAGATGAAGCATGTGTTGC<br>TCAAGAAGATGACTTAAATTAGAACAATCTTG<br>TT  |                            | NA                          |
| Ca-II-SNP978 | 18.80                  | Ca-desi-LG(Chr)6 | 1363682                 | TTAGTCCAAAGTAGGTTGAAGACTTCGATGAGAGT<br>TATGCACCTCGGCCGCTACCCTTCCCTGTGAAT<br>TTTGTGTTTAGCTGAAGTGATTACGACTT     | A         | G       | AAGTTGGAAGTATGTAAGAACATTTCCAACCTTG<br>GACAAAACAATAAAGAAAAAGAAAAATACAAT<br>GAACTAATGAAAGAAAAATATAAGAAAAAATA       |                            | NA                          |
| Ca-II-SNP979 | 19.74                  | Ca-desi-LG(Chr)6 | 1399426                 | GCTCAACAGAAATGGGAAGTTGAAACACTCACAG<br>CCTTCTGAACAGCCTCATTAGTCACTCTGGAGAG<br>GACTTCTTGAAGCCTGAGCTGCAGCATTAG    | A         | C       | ATTAACCTTCTTTCTTTATCCTATATCAGAGA<br>AAACTATATGTTTTCCTGTTTGTTCACAT<br>TTTTATGGTTTCAATTTGCAGGCCTTCTCTCT            |                            | NA                          |

| Marker IDs   | Genetic positions (cM) | Chromosomes               | Physical positions (bp) | Flanking sequences/Forward primers                                                                           | ICC 12968 | ICC4958 | Flanking sequences/Reverse primers                                                                                                                                                                                                                                                                | Annealing temperature (0C) | Amplified Product size (bp) |
|--------------|------------------------|---------------------------|-------------------------|--------------------------------------------------------------------------------------------------------------|-----------|---------|---------------------------------------------------------------------------------------------------------------------------------------------------------------------------------------------------------------------------------------------------------------------------------------------------|----------------------------|-----------------------------|
| Ca-II-SNP980 | 20.68                  | Ca- <i>desi</i> -LG(Chr)6 | 1448279                 | TGGGGAGTTAATTGGTGTATTCCTTCACTTCCATG<br>TATTTATAATTCAACACAGTGTGTCAAATAGCAATT<br>ATAGTGCCGCTATAGTGTATAGCGTAGC  | G         | A       | AAAATTCGCTACGCTATAGTGCTATAGCACTA<br>TTATACCTGCTATGATGACACTTTAGTACTAAAT<br>AGCATATTGCAGAGCAATAGCGATTTCAAATTT                                                                                                                                                                                       |                            | NA                          |
| Ca-II-SNP981 | 21.62                  | Ca- <i>desi</i> -LG(Chr)6 | 1455782                 | GCATTTTTCTACCTTCAAAGGAGTTATTCCT<br>CTTCATAACCATCCAGGAATGACTGTTTTTCAGTAA<br>GCTTCTATTGGGACAAATGCACATTAAGTC    | A         | T       | GTTAATTGAATTTGATGATATGAATAGAGATTA<br>GAAAATACACACATTGAGATGGTTGTTGCAACA<br>AATTGTGAGAGACCTCAGGATCAACCCAATCAT<br>A                                                                                                                                                                                  |                            | NA                          |
| Ca-II-SNP982 | 22.56                  | Ca- <i>desi</i> -LG(Chr)6 | 1471831                 | CCAGCTTATAATTTTGTATCTCGCTTGTTCCTTAC<br>TTAAAAATGATACATTTTTATTGGCAATATATCTTT<br>TGATTCATAATAAGATTCAATTCACGAT  | C         | T       | TCAAATTAATTTAGCATGCAATTTAACATCGGT<br>TGTCATGTCATAGGCCATAGAATCAAATCGAG<br>ATTCAAATCATGAATTAGAAGACCTATTTTCG                                                                                                                                                                                         |                            | NA                          |
| Ca-II-SNP983 | 23.50                  | Ca- <i>desi</i> -LG(Chr)6 | 1498906                 | TTCTTGGTTTTACTTGTATGCAGAGTACAAGGATA<br>CAAAGCATAGTCACATCAGTGAATATATGTGCTTT<br>GATGTTTGCATAGTAGCTGGTGGTACTT   | A         | G       | TTAAGATACCAAAATATATATGGAGAAGGGG<br>TATTGAAAAATATGATGTAATTACCCTGTAG<br>GTAGTTGATATCCAATCCAACCGATTTTGAATC<br>C                                                                                                                                                                                      |                            | NA                          |
| Ca-II-SNP984 | 24.44                  | Ca- <i>desi</i> -LG(Chr)6 | 1558305                 | CAATATGAATAATATGTATCTAAATTTGAGATCTTT<br>GTAGTTGTTCCAAGCGTATAGGGATAGTTGAGTC<br>AAAATGAGTGCTTTGTGGATTCTCTGCATA | A         | G       | CATATGAAATATTTATAGAAATATATAACTCT<br>ATATGTTTTGCAGGTTGATTGGCTATGGCATG<br>GCCACAAGCATGTGTTTCTGCTACTATGTTGC                                                                                                                                                                                          |                            | NA                          |
| Ca-II-SNP985 | 25.38                  | Ca- <i>desi</i> -LG(Chr)6 | 1558359                 | GCATTTTTCTACCTTCAAAGGAGTTATTCCT<br>CTTCATAACCATCCAGGAATGACTGTTTTTCAGTAA<br>GCTTCTATTGGGACAAATGCACATTAAGTC    | A         | T       | GTTCAATTTAGTACCAATTTTCAACCTTTAG<br>AGGCTTTGCTAGGTCAACAAAATTGTTGGTGG<br>AGATATTGATGAGTTCATGTTTTTCATGTGTTAG<br>TTGTTATATGGGAATTGCATCAATTCCTGTGAG<br>TTGTGGAAATAGATGGGTTTTGTGCATGTTGG<br>AGTTTATAATAAAGGGTTTGTGCAAGCTTCTAA<br>GGATACATGGGACATTTTTAATAGGGTTGGATT<br>GCAACAATTTATACAGCTTCATCTAACTCCATC |                            | NA                          |
| Ca-II-SNP986 | 26.32                  | Ca- <i>desi</i> -LG(Chr)6 | 1559819                 | CCAGCTTATAATTTTGTATCTCGCTTGTTCCTTAC<br>TTAAAAATGATACATTTTTATTGGCAATATATCTTT<br>TGATTCATAATAAGATTCAATTCACGAT  | C         | T       | GAAGAATCAAAGCAATGACACCAATTGCAAGA<br>CTTATTGGAGATTCAATGTACACAACATAATA<br>GCCATTGAACATGTAAGCAAAGGGCTAATCCAA<br>AATGCTACTTTGATGGCATTGTTGGTGTCTTG<br>AAAGTGAACCATGCCAAATGAAACCAAG                                                                                                                     |                            | NA                          |
| Ca-II-SNP987 | 27.26                  | Ca- <i>desi</i> -LG(Chr)6 | 1593638                 | TACGATATGGTACTGTTCGTCCTCAATCTCTACCA<br>CCACCCCTGACTTGCATCATCAAATTAACCTC<br>ATTAATGAGTGGCATGCCATCAGGTAATAT    | T         | C       | TTTTTAATTAATTTAATTCATTATTGATTTAAT<br>TTATTTATTTTTTATTACAGCGTCGAGCAATAC<br>AAATTGTTGAAGAGCTGATTGGCCGACAACT                                                                                                                                                                                         |                            | NA                          |

| Marker IDs   | Genetic positions (cM) | Chromosomes               | Physical positions (bp) | Flanking sequences/Forward primers                                                                 | ICC 12968 | ICC4958 | Flanking sequences/Reverse primers                                                                                                                                                                                                                           | Annealing temperature (0C)     | Amplified Product size (bp) |
|--------------|------------------------|---------------------------|-------------------------|----------------------------------------------------------------------------------------------------|-----------|---------|--------------------------------------------------------------------------------------------------------------------------------------------------------------------------------------------------------------------------------------------------------------|--------------------------------|-----------------------------|
| Ca-II-SNP988 | 28.20                  | Ca- <i>desi</i> -LG(Chr)6 | 1606173                 | CATGCTTCTCGTCTCATACGCAGCAGCTCCAAGCGTGGAATTCAGGGCACAGGATCGGTGCTCTGATACCAGTGTAACTACTGGTATCAATTAGGAAT | G         | A       | CTTCTCTACAATTCCTTGTATTCTTCTATTCAATCAATAATACAAGAGATTAGGGTTCATTGATCCTAATCCACCATTAGTTCAATTACGCTATT                                                                                                                                                              |                                | NA                          |
| Ca-II-SNP989 | 29.14                  | Ca- <i>desi</i> -LG(Chr)6 | 1740238                 | CTTGTTACTTGAACCTATGCAATTTCCCTGAGCATTGACCTTTCTTTATAAGCGTTTTAGAGCAATTAAATAGTCAAAGAGTTGTTGGTAGTG      | G         | A       | TGTTGATGGTGTCTGGTTTTCATATTGATCCCTTAATGGAGAAGAATCAAGCAACAAAATTGCTGATTTCTTTGAAAAATGTAAGTGGATTCAACAATTGGAAATATGATTTCTGTGACCGGATTGCAGCGCATTAAATGAAAGTTATACTTGAAGATCTATGCAAACAAGTTGCTGAATATGGAAACATTTATACCTTTGGAGACAAGTGAATAATGAACCAAAAATGAAAGCATACATTTGATCTTCTAT |                                | NA                          |
| Ca-II-SNP990 | 30.08                  | Ca- <i>desi</i> -LG(Chr)6 | 1840672                 | CGGTTGTTGTTGCTCTCAAACCGTGCAATAATACCAAATTCCTATCTCTCTCAAATCTTAGATCGAA TTGATGTTTAGAATGTTGAAAATGGGTTT  | C         | G       | TATATTAATATGAATTCATTTTATTACAATAAACATATATATCTAATAATTTGACATAATTTTCAGGTA GGACCTATAAAAATTTGCATATTTCAATCTC                                                                                                                                                        |                                | NA                          |
| Ca-II-SNP991 | 31.02                  | Ca- <i>desi</i> -LG(Chr)6 | 2035499                 | TCTATATTTCTACATGAATCTATTATAACAACCAACATTTGGTCAGGGCAGGCTTTGATTTTTGTGTCAA TTACTTTCATATGGAATATCTTCATTG | G         | A       | ACATACTTGTGGATGAACAACAACAACAAAAAT TGATCCATCTTGATAGTACTATAGTATTGGCA TAACAAGACATGAAATGAATCTTGAAGCCGT                                                                                                                                                           |                                | NA                          |
| Ca-II-SNP992 | 31.96                  | Ca- <i>desi</i> -LG(Chr)6 | 2058649                 | GCCTTAACACTATTGTTGGTCCCATGGATTGCCCTTCGCTTTCTTATAGATAGAGTTATAGATG ATACAAAAATGACTTCAACCTAGTATTTAC    | C         | T       | AACAAATAATTGAGAAGTGTGAGTATTTACTTAT AAGATTTTTAATCTCAACTTTCAAGTTACGTAA GACATTTTTGTTTATGCTGAAAAAATTTGAAA                                                                                                                                                        |                                | NA                          |
| Ca-II-SSR328 | 32.90                  | Ca- <i>desi</i> -LG(Chr)6 | 2160721                 | TCTTAAGAATCACTCGAATATTGAAA                                                                         | (TAT)16   | (TAT)29 | ATCTAAATTTGTTATTTTAAATGGGATTCACA CATATAACGACGATAATAACAATAACAATAATAA TAATAATAATAATAATAATAATAATAATA                                                                                                                                                            | GGGATTCACA<br>CATATAACGA<br>CG | 57.75                       |
| Ca-II-SNP993 | 33.84                  | Ca- <i>desi</i> -LG(Chr)6 | 2161729                 | CGATTTGCTTCTTCTCTCAAAGAGAAGAGCTTATTCGAAAAGTTGCTTCTGCTTTCAACGGCAAGCTC AACATACTTGTAGTCATTTCTTTCTATA  | T         | A       | TCTTATAATTTATGCTAAAATTGTTAAATATAAAT AACTAGTTTAGGGATTTGAAAGCAATTTGAAAAAT TATAATTTTTATGATTTATGCTAAAACACAC                                                                                                                                                      |                                | NA                          |
| Ca-II-SNP994 | 35.72                  | Ca- <i>desi</i> -LG(Chr)6 | 2203748                 | CTTGTTACTTGAACCTATGCAATTTCCCTGAGCATTGACCTTTCTTTATAAGCGTTTTAGAGCAATTAAATAGTCAAAGAGTTGTTGGTAGTG      | T         | A       | GATAAACAGTAGTAGAAGAAGTTGGAGTTGGGCAAGTTGCCAAGTATTACATCAGGCGAAG AACAGTATGCTGTTGCTGGGAAAAGCTGACT GATACTTATCCTAACCTTTATTGGAGCGCTCT GCAGCTCATTGCATTGATTTGATACTTGAAGAT TTTGAAATCTTGAGTGGATTAGTACAGTAG                                                              |                                | NA                          |

| Marker IDs    | Genetic positions (cM) | Chromosomes      | Physical positions (bp) | Flanking sequences/Forward primers                                                                          | ICC 12968 | ICC4958 | Flanking sequences/Reverse primers                                                                                                                          | Annealing temperature (0C) | Amplified Product size (bp) |
|---------------|------------------------|------------------|-------------------------|-------------------------------------------------------------------------------------------------------------|-----------|---------|-------------------------------------------------------------------------------------------------------------------------------------------------------------|----------------------------|-----------------------------|
| Ca-II-SNP995  | 36.66                  | Ca-desi-LG(Chr)6 | 2208003                 | CTACAAAATCAGACAAGTATTGTTGAGTGGGGAA<br>TTTGCTGATCCAAATATTTGCAAGCCAACCTTTGTT<br>TGCTCGTGTTTTTAAGACAGTTTGCCTCG | T         | A       | GTGAAAAAGAAGTATGATCATGCAGGGCAAATG<br>TAATGGCATAACGTTTTGCCAAACAAGTCATAA<br>GGGAAGTTGAATCATCATAAGCATAACTATAAG<br>C                                            |                            | NA                          |
| Ca-II-SNP996  | 38.54                  | Ca-desi-LG(Chr)6 | 2235926                 | CTTGTTACTTGAACCTTATGCAATTTCCCTGAG<br>CATTGACCTTTCTTTTATAAGCGTTTTAGAGCAATT<br>AATAATGGTCAAAGAGTTGTTGGTAGTG   | C         | T       | ACTGAAACATATAAGAAGTAAAGTTGTAATGGA<br>ACATTGGAGAAGATACAGAAAAGGAAATTAGCA<br>ACATAACAAATTATAAAAGAACTTATTTGAGA                                                  |                            | NA                          |
| Ca-II-SNP997  | 39.48                  | Ca-desi-LG(Chr)6 | 2348827                 | CTCTTCTGCCAACTTTTTCTTCAGTTTCATTATG<br>TGCATCACGCTTTTCCAATTCAAATTTCCGTGACT<br>CAAGCTCCCTTTTCTGAGATTCAGTTGC   | G         | A       | TTTTATGCAATGATTCCTCTGTATTTAGAGATAA<br>AGAAAATACAGACAAGTGCTAAGGATCACTTCC<br>AAAGGATTTTTAACGATCACGAAAAGCTTAAAT                                                |                            | NA                          |
| Ca-II-SNP998  | 40.42                  | Ca-desi-LG(Chr)6 | 2376749                 | CACTGTTTTCTTTCTTTTCGAGGGTTTTTTCTTT<br>TTCTCTTTCTTTCTTTGAGGTGTCGACGACTGC<br>CATATTGAGAGTGAATATAGAACGGTT      | T         | C       | CGATGCACTGCCAAATGTGCAAGACAGACT<br>ATCAATCATGAAGTCCCAGGATAAAACAGTCC<br>AGATACTTTGTATTGGAGTTCTATTGCACTGTA<br>GA                                               |                            | NA                          |
| Ca-II-SNP999  | 41.36                  | Ca-desi-LG(Chr)6 | 2408161                 | CTTGTTACTTGAACCTTATGCAATTTCCCTGAG<br>CATTGACCTTTCTTTTATAAGCGTTTTAGAGCAATT<br>AATAATGGTCAAAGAGTTGTTGGTAGTG   | A         | G       | TTGGAACCGGTGATGTACTTGTTCGTGTCAT<br>GGTGAAGTAAGTTTCTTGTGATAAATCCCG<br>CCCCCTTCTGGAAAAAGAACTTTCCATTTT<br>CTTTTGACAGGACTACAAGCTTGAACTACTT<br>CAAGTAGCATTCCGAAA |                            | NA                          |
| Ca-II-SNP1000 | 42.30                  | Ca-desi-LG(Chr)6 | 2565245                 | GGTGGAGCCTAACGTGCAGTTGGTTGTGATCCG<br>ATAGAGGAAGCAACAAAGTCGGGTCCAGCTGCTT<br>CTTCATCCTCAGTGGATGCAGCTAGTATGTC  | A         | G       | ATCAATAAGAATGTATCTGAAAAAGTTTATGCAT<br>TTTTTTAAAATGTATTTTGACAAAAGTAAATGAAG<br>TTTTCTTTACCTTTATCTTCCCTCCACCATTA                                               |                            | NA                          |
| Ca-II-SNP1001 | 43.24                  | Ca-desi-LG(Chr)6 | 2624838                 | CTTTTTCAATTTAAAGATAAACCAATTTTCCCTGAT<br>ATTTTCCCATTTGATTTGGGTACCTCCTTTTGA<br>AGCGTTGCAAGACTGACTCTGCCTTTTT   | C         | A       | AGTGTAGTAAACAAGCTCATCTATTGTAAGGA<br>TACAAGTTAGACATTTTAAACCTCCTAACCACTT<br>AAAATTGACAAGAAAATATAGAAACAGCAAAAT                                                 |                            | NA                          |
| Ca-II-SNP1002 | 44.18                  | Ca-desi-LG(Chr)6 | 2648414                 | ATCGAGATGCTCTAATTTTGCAGGTCGCTTTT<br>TCAGGTTTTCAACCTAGCGAGCCATTTTTCGATC<br>ATCATTTTTCTAAGCATAATATTTTTTGA     | T         | C       | CGAAGGACCATATGTTGTAAAAAGCCTTCTC<br>TGGTGGAGCTCTAATACTCGCAGAAATGGATG<br>GAGAGGACCTTCCACTTCCAGTATATTGAGATG<br>CA                                              |                            | NA                          |

| Marker IDs    | Genetic positions (cM) | Chromosomes               | Physical positions (bp) | Flanking sequences/Forward primers                                                                             | ICC 12968 | ICC4958 | Flanking sequences/Reverse primers                                                                               | Annealing temperature (0C) | Amplified Product size (bp) |
|---------------|------------------------|---------------------------|-------------------------|----------------------------------------------------------------------------------------------------------------|-----------|---------|------------------------------------------------------------------------------------------------------------------|----------------------------|-----------------------------|
| Ca-II-SNP1003 | 45.12                  | Ca- <i>desi</i> -LG(Chr)6 | 2657388                 | CTCATGCAGCGGTCTTTTGGCTCCAATTGCACTAC<br>ACTTGATGAGATGAATTACCAACTCCTTCTTGAAT<br>TCCTTCTTTTCTATCTTAAACTCTTTTGG    | T         | C       | CCCCACTCCTGCCTTAACGTTCCCACGGCTTAA<br>CGTTCCTCGTAAAAGAAAAAACAACAAAAGGG<br>ACGTCCTCCATTCAAAAACACGTTGTGCGATAT<br>A  |                            | NA                          |
| Ca-II-SNP1004 | 46.06                  | Ca- <i>desi</i> -LG(Chr)6 | 2661720                 | TGTTGGGCGTGTACTTCTTGGCATTGAGTGGAG<br>GCTTCTGCCTTTGGTCTTTGCAATCCCTGGCTA<br>GATGTCGGGCTTCTGGCATTAAAAACATAACA     | C         | T       | CTCCATTTCAAATGATAGACATAGGACTTTAGA<br>ATCAAAGCCACTACTGTTTCGTTGTGGAGACCCA<br>AGACACCTTACGACTAAGTGCCTCTCAACGG<br>CA |                            | NA                          |
| Ca-II-SNP1005 | 47.00                  | Ca- <i>desi</i> -LG(Chr)6 | 2720364                 | GTGTGAAGTAGAGGTTGCATGTACCTCACTTTTGA<br>ATTCTTCAAGTGATTACCCAGAGATATCTTGATGC<br>AGAAACCTCTTACAGCAACTTCTACAAA     | T         | C       | TATTTCACTTGTGAGTATCAGTACTTTTATGGGT<br>AATATTGTATTATGCTGTAATAACAGATTTTAG<br>TATGTATATTTTATGATGTTTCTGCTCTTTG       |                            | NA                          |
| Ca-II-SNP1006 | 47.94                  | Ca- <i>desi</i> -LG(Chr)6 | 2725154                 | ACTGAATGCAACCAATTCGAAAGCTTTTTTCGAGT<br>AGTAGGCGATGAAGATGAACCATTGAGACTTGG<br>TTGTTCTTTCTGCAGCAGACCTTGTACAT      | C         | T       | AGAGGTTTTCACTTCTTTAACATTGACTACTGTT<br>ACAACAAGGTGAAAAGTTATGAAGAACATTCTT<br>AAGAAGCTTCATATAATGTCTAATCAATCAGAA     |                            | NA                          |
| Ca-II-SNP1007 | 48.88                  | Ca- <i>desi</i> -LG(Chr)6 | 2742457                 | AAATCAAGCTCTTGCCTTGGCTACGTCATCCTGAT<br>ATTGTAGAAATTAGGCATATTATGCTTCTCCTTC<br>CCGCCGAGAGTTGAGAGATATCTATGTTGT    | C         | G       | GACCCCGAAGAAGTTGGTACAAGAAAAATTGG<br>TGGTGCTCAGGAGTAAGATCATCTTTGCCTTA<br>ATGACTTGATGTAGATCAGATTCCATCAACTCA<br>AA  |                            | NA                          |
| Ca-II-SNP1008 | 49.82                  | Ca- <i>desi</i> -LG(Chr)6 | 2771903                 | CATATGAGCACAAAGGCTCCATCTTATGAGTACAAG<br>TCACCCCCACCTCCACCACCTTACATTTACAAGTC<br>TCCACCACCTCCACCCTATGAGCACAAAGTC | A         | T       | GTGGTGGAGGTGATGGTGTGGAGGAGGTGG<br>TGACTTGTACACATAGGGTGGTGGGGGTGATG<br>GTGTAGGAGGCGGGGAGACTTGTACTCATAA<br>GATGG   |                            | NA                          |
| Ca-II-SNP1009 | 50.76                  | Ca- <i>desi</i> -LG(Chr)6 | 2775649                 | ACCAGTGTGGCAGCCACCCCTACGCACACATT<br>ACATGTTATCTCATGCACTATTTAACAACAACTCTT<br>ATTTGTTTTAGGTTATAGTTTTCTTCGAG      | T         | A       | AATATCGTAGCTCAAAGATGATAAATTCAAACG<br>TTTATTTAAAAGAATATGGACAGGAAGCTAGATG<br>TTTCACTTTTCTCCAATGGAGCTTGCCTTTATT     |                            | NA                          |
| Ca-II-SNP1010 | 51.70                  | Ca- <i>desi</i> -LG(Chr)6 | 2844907                 | ATAGCACATAATACCCCATGAAGGTAGCCCTTATA<br>GGTAGGGCAACAATTGGGTGGTAAAGTTTACTT<br>TGAGAATCATTATTATTTGCATGTTAGTGG     | A         | G       | TGGTTTACCCCCACAAAATGAGTCATAAGTAG<br>CCACTATGATCACCAAAACCAGGATGATAATTC<br>TCAATCATCTTTCATAACAATCAACCAAAATCC       |                            | NA                          |

| Marker IDs    | Genetic positions (cM) | Chromosomes      | Physical positions (bp) | Flanking sequences/Forward primers                                                                            | ICC 12968 | ICC4958 | Flanking sequences/Reverse primers                                                                                                                                                                                                                                                                                                                                                                               | Annealing temperature (0C) | Amplified Product size (bp) |
|---------------|------------------------|------------------|-------------------------|---------------------------------------------------------------------------------------------------------------|-----------|---------|------------------------------------------------------------------------------------------------------------------------------------------------------------------------------------------------------------------------------------------------------------------------------------------------------------------------------------------------------------------------------------------------------------------|----------------------------|-----------------------------|
| Ca-II-SNP1011 | 52.64                  | Ca-desi-LG(Chr)6 | 2931598                 | TGAGTTTATTTGAATTTTGAGTTATGTATTTGATG<br>AATACATGAATTTTCTTAAAATTGGTATTGATATTT<br>ATGGATTTTGGTGAATTTTCTAAATTTA   | T         | A       | AGTCATTTTTTTTTTTTTTTTTATTTGTTTATTTAT<br>TTAATTTTAAAGTAACAATCTAATTATTGATATCT<br>TAAAATGTCAATAATATTATCATTGTTTAC                                                                                                                                                                                                                                                                                                    |                            | NA                          |
| Ca-II-SNP1012 | 53.58                  | Ca-desi-LG(Chr)6 | 3080317                 | GAAAGAATTGTGAATTGTTTACAGATTGTCCAGTT<br>TCCTCGAAACCTATCTATCTCTCACAACTCTTTTC<br>CTATTGCTCACCCCTTGATCCTTGTAGTCA  | C         | A       | AACGACTGTTAGAATCCAGGTAGAACTGGTG<br>GCGATCTTCTGGGTGAGAGGCCCTCATCAAGA<br>AGGAGCCGTACTTTGATTTTGTGTGAGTCTGCT<br>GA                                                                                                                                                                                                                                                                                                   |                            | NA                          |
| Ca-II-SNP1013 | 54.52                  | Ca-desi-LG(Chr)6 | 3532503                 | GCTCGCAGCGTCTAGGATCAGCAACAAGAAGAGT<br>ACGGTCATAACGAACAAGAATGTCCTTGATCTCCT<br>TCTTACTCTGTTTCATCCACATATTTCTGATA | G         | A       | GTTTCGCCGGCGTTGACATGAGGATCAGAGTG<br>AAGGGAGGAGGACATACTTCTCAGATCTATGC<br>CATCAGACAGAGCATCGCAAAGGCCCTGGTTG<br>CATA                                                                                                                                                                                                                                                                                                 |                            | NA                          |
| Ca-II-SNP1014 | 55.46                  | Ca-desi-LG(Chr)6 | 3542345                 | ATTCTTCTCCACCGTTGCTTTGTTCCGGTTCAAGG<br>AAACTCTACCTTATGGAATGAACTCTTATGGACTC<br>GTTCCATTGGTTTATCTTTTACCCTT      | T         | G       | ACAATTGAGTGCTTCATCAATTAGTTGTGCATC<br>GGAGTCACAAATCTTGTGAGGAATTGGAAC<br>TATTGATGAAGAAGAAGTAGCGTCTTGAATG<br>A                                                                                                                                                                                                                                                                                                      |                            | NA                          |
| Ca-II-SNP1015 | 56.40                  | Ca-desi-LG(Chr)6 | 3557055                 | GTGTGAAGTAGAGGTTGCATGTACTCTACTTTTGA<br>ATTCTTCAAGTGATTCACCAGAGATATCTTGATGC<br>AGAAACCTCTTACAGCAACTTCTCAAAA    | T         | A       | AAGTACCACCAAAGTCAGGTGACTTGATCTCTA<br>GTCTATTACAATAAATGATAATATGATCTATTAC<br>ATCTGTTTATCCCACTCCACAAAATTAATAATA<br>CAACCAAATAATGCCTTGAATTCACAAATTA<br>TGGGAATTAACGTTGCTACCCCAACCCAA<br>CCATAAAAAACATAAAATCTCACTCAACATTCA<br>GCAACGCTGCATTATATCATATTAGACCGTTTG<br>TCAAAATTTCTTACACTTCTCAACTTTCATCA<br>GAACAAACAAGCATAAATAGAGCAAAAAGAGCT<br>GCTGTACCTTGTCTGACCCCGACATCCCAC<br>ACAGTGAAGCTGATGTTCTTGTACTCCACGGTT<br>TC |                            | NA                          |
| Ca-II-SNP1016 | 57.24                  | Ca-desi-LG(Chr)6 | 3591192                 | ATGTGGCCGACACAATGTGTTTCTAATGCTCCTA<br>ATGCACCTTATGGCTGTAATCTATAAAATAATTGA<br>GTCAATTTTTCTATCTACAGGTTCAATGT    | T         | G       |                                                                                                                                                                                                                                                                                                                                                                                                                  |                            | NA                          |
| Ca-II-SNP1017 | 58.08                  | Ca-desi-LG(Chr)6 | 3613223                 | TATCTTTTTACATTTTTTTGTTTGAAAATATTGCA<br>AATTTATTTAGTTTTAAATCCATCTTCTGAAG<br>CCTTTCATTTCACTTCTCTTTATC           | C         | T       | TGCCATTGTTGTTGTTGTTTTTTTGTGTTGT<br>TGTTGTGTTGGAATGAAAGATGAAGAGAAGAAG<br>AGAAGAAGATAATGAAAAGGGATAAGAAAAT                                                                                                                                                                                                                                                                                                          |                            | NA                          |
| Ca-II-SNP1018 | 58.92                  | Ca-desi-LG(Chr)6 | 3712916                 | CAGAATCTTTATACACATCAGAATCTTTTCATCT<br>TTAGATTTCTCTTTACAATCTAGTCCACCATATAT<br>GACCATATTATGGGTCAACCATGACTGT     | T         | C       | TGCATAAAATTTTTATGCAACATATCCATATCGA<br>TCTATATCATCAAGTACATATTAATGTGGTGGC<br>CATTTGAAATTTAGTCACATTATATGTTAGTGAC                                                                                                                                                                                                                                                                                                    |                            | NA                          |



| Marker IDs    | Genetic positions (cM) | Chromosomes               | Physical positions (bp) | Flanking sequences/Forward primers                                                                            | ICC 12968 | ICC4958 | Flanking sequences/Reverse primers                                                                                                                                                                                                 | Annealing temperature (0C)         | Amplified Product size (bp) |
|---------------|------------------------|---------------------------|-------------------------|---------------------------------------------------------------------------------------------------------------|-----------|---------|------------------------------------------------------------------------------------------------------------------------------------------------------------------------------------------------------------------------------------|------------------------------------|-----------------------------|
| Ca-II-SSR329  | 59.76                  | Ca- <i>desi</i> -LG(Chr)6 | 3786461                 | TCTTGCACAACACTATTCGG                                                                                          | (TAT)15   | (TAT)17 | GTAATCAAACATAGGCTAATTCCTTTACATTT<br>ATCAAACAAAATAAATAAGATAATTTAAATAAAA<br>TGAAGAGAAAAATAAACACATAAAAAATAATA                                                                                                                         | TCAAACATAG<br>GCTAATTCCT<br>CTTACA | 59.84                       |
| Ca-II-SNP1019 | 62.28                  | Ca- <i>desi</i> -LG(Chr)6 | 3998825                 | AGCATCATCCATTCCATAGCTAACAGTCCCATCTC<br>CAATTCCTTCTCACCTCGCTCAAGCTCCTCCAAT<br>AATCTGAAATTCCTAGGAATGCATTGATA    | G         | C       | TGTCAATGTAACTATCATTGACTACATTCATCT<br>GATATTGTAAGTGTCTATTGCACACATAGATTT<br>GTAATTTTAACTTATCTTGTAAAAATTTGGT                                                                                                                          |                                    | NA                          |
| Ca-II-SNP1020 | 63.12                  | Ca- <i>desi</i> -LG(Chr)6 | 4052251                 | CATCCAATATAAAACGTCTATCACATTATTCTTTT<br>ATTTTTTTTTAAGTTGTATAATTTAAATATCATAGC<br>CTTGTA AAAAAGTTTTTTTTTTTTTTTT  | G         | A       | ATTTAATGAATTAAGTAATTGGACATTAATCTC<br>ATTGCCTAGCAAAAACATAACAGATTTTAAAGA<br>TTTTCGTTTCTGTCTTCTCACAAAGTTGTGTG                                                                                                                         |                                    | NA                          |
| Ca-II-SNP1021 | 63.96                  | Ca- <i>desi</i> -LG(Chr)6 | 4077783                 | TTGCGGCCAATGCGATCACTGACAACAAGACCA<br>GCATTTCGTAACATCACGAATCACAACTCTCGTCTTC<br>CCACGACATTGTGAATTGGAGAGCTGCAATT | A         | G       | CTCTCCACGGTCTTCTTCTCCTTTCCCGC<br>TCTCTCCCTAATTTGATTCTCCATTTGTTTATCG<br>GGAAACAAAAGAGGGCTTCAATTTGATTCCACC                                                                                                                           |                                    | NA                          |
| Ca-II-SNP1022 | 64.80                  | Ca- <i>desi</i> -LG(Chr)6 | 4132081                 | GTGTGAAGTAGAGGTTGCATGTACCTCACTTTTGA<br>ATTCTTCAAGTGATTACCAGAGATATCTTGATGC<br>AGAAACCTCTTTACAGCAACTTCTACAAA    | T         | C       | ATTTATTGCTGGTGAAGCAAGACGTGTCTTCCA<br>ACTTGGGGCCATCAGAGCTCAAGAATCACTTG<br>GATGAACCTGGAGATCAGTTATTTAGTGGGACA<br>TGCAATTTCTTCCCAAAAATAAAGACCACAAA<br>CACAAAGGTACCGTCCGCTTTCATGTCTTCAAC<br>GACTCAACATCCGTTTGTGCAAAAGATGGAATA<br>ACGGTG |                                    | NA                          |
| Ca-II-SNP1023 | 65.64                  | Ca- <i>desi</i> -LG(Chr)6 | 4135764                 | TATGCGAGTTTTTTTTTTTTAAAGGGTAGAAAAGA<br>GGAAAAGGAAATGATTTTTTCTGTTTACATATTT<br>GATTCATTATTTGCATAAGTCATAGGT      | T         | C       | CCTTCGACAAGCCACTTTAATGAATTTAATTA<br>GGTTAAACCATATGGTAATAACCAAGACTCATT<br>GTAATTCACAAGTCCTATTTAAAGTAACAGTC<br>A                                                                                                                     |                                    | NA                          |
| Ca-II-SNP1024 | 66.48                  | Ca- <i>desi</i> -LG(Chr)6 | 4260700                 | GAGCATAAAATAATTTATGCGAGAAGAAGATGGTT<br>TTGGTCTCCAATATGTGTATCTATTTCTCTATTA<br>CTAACTATTATCGTTGCTTTGCAGTTTGA    | T         | G       | TTTTATCTTTACATTGAACACCAAGCTGTAAGC<br>CACCTGTTAAGTTGTTAATAAAAAACGGTTAC<br>TCTTGGTTTTGGAGCAGATTGCTTTTAGAGCC                                                                                                                          |                                    | NA                          |
| Ca-II-SNP1025 | 67.32                  | Ca- <i>desi</i> -LG(Chr)6 | 4331449                 | TTGTTGTGGGACAGGTGAGGCAGGAGAAGGAG<br>TAGGTTCCAGGAGGTTACGCAGTGGAGAGGTTGG<br>TAGTGGTGATGGTGTATCCTCAGGTGGAGGATG   | G         | A       | ACATTAACAGATGAAGATTCAAACTGATGACC<br>GTCCTGTCTCAAAGAAAAGAAAACCTGTCCTT<br>CCTCTGTTTCTCAAACCTGGAAGATGAACCAT<br>C                                                                                                                      |                                    | NA                          |

| Marker IDs    | Genetic positions (cM) | Chromosomes               | Physical positions (bp) | Flanking sequences/Forward primers                                                                            | ICC 12968 | ICC4958 | Flanking sequences/Reverse primers                                                                                                                                                                                                                                                             | Annealing temperature (0C) | Amplified Product size (bp) |
|---------------|------------------------|---------------------------|-------------------------|---------------------------------------------------------------------------------------------------------------|-----------|---------|------------------------------------------------------------------------------------------------------------------------------------------------------------------------------------------------------------------------------------------------------------------------------------------------|----------------------------|-----------------------------|
| Ca-II-SNP1026 | 68.16                  | Ca- <i>desi</i> -LG(Chr)6 | 4403765                 | CCACATACAACCTCCATAATGAAATGTGATGTTGAC<br>ATCAGGAAAGACCTGTACGGTAACATTGTCCCTTC<br>AGGAGGTACAACCATGTTCCCTGGCATTGC | T         | C       | AACCACCAATCCAGACACTGTAATTTCTCTCAG<br>GGGGTGCACCACCTTGATCTTCATGCTGCTT<br>GGGGCCAATGCAGAAATTTCTTGCTATTCTA<br>TC                                                                                                                                                                                  |                            | NA                          |
| Ca-II-SNP1027 | 69.00                  | Ca- <i>desi</i> -LG(Chr)6 | 4407916                 | TTGTTTTGATTTTATGCAATGGATGTGTTAAGATT<br>GTTTGTTATGAAAATATTTAATGGTTTAAATTTGA<br>ACATTTGAATTTTCGTGAAATAAAAGTTGT  | A         | C       | AATTGGATTATAATAAGATATGATAACATATATA<br>TCATTTCCCTTTTCTATCTCGACTAGTAAAAAA<br>TTATTGCAGTTAAATTAACCTGTATTTGAAA                                                                                                                                                                                     |                            | NA                          |
| Ca-II-SNP1028 | 69.84                  | Ca- <i>desi</i> -LG(Chr)6 | 4421550                 | ACAAGAATGATTCATGGATGATTCTTGATAAAACG<br>GCTTCAATGGCGTTAGAAACGGCCGCTTTGAGT<br>TTCTATGCTAGGGCACAAGTCTCCCAAGTTC   | T         | C       | CGCGCGCCTGGAGCGCACCCCTGCACGCCTGG<br>GGCGCGTGACGCGCATCAGCAATCATAAAAAC<br>GCAAAATTTTACTGTTTATGGATCTTTTGACTC<br>TTG                                                                                                                                                                               |                            | NA                          |
| Ca-II-SNP1029 | 70.68                  | Ca- <i>desi</i> -LG(Chr)6 | 4459719                 | AGCTTTAGCAATGCCCTTCTGTAGGATTTGTTA<br>ATGGAAAACTTAGGTCAAGTGCTAAGATATTTGT<br>TACTGTTTTCCATAAAAATTACCCAGTAGA     | T         | C       | ACAGAACTTAATATACTGTGTTTAGTACTATTTT<br>TACTCTTTTGTGTTTTCACCTTTTCAACTTCCAGCA<br>AGCAGATCTCAATGGGTGCACCGGATGAAACC                                                                                                                                                                                 |                            | NA                          |
| Ca-II-SNP1030 | 71.52                  | Ca- <i>desi</i> -LG(Chr)6 | 4472854                 | TCCCTTATCTTGAATTTTTTTGAAGATGTTGATGTT<br>ATAGGTTGGATAAATAGTCTGTTGGATTAGCTTA<br>TTTTAATTTATCAAAATGGCATAAATATTT  | G         | A       | TTTTACATGTTATTCATCTTAGAAAATTTATAAA<br>AATTAGTTAAAAATAGCTTATGAATATATCATAA<br>ACTGTTTCTACAAAATTTCTCAAACAATCTAA                                                                                                                                                                                   |                            | NA                          |
| Ca-II-SNP1031 | 72.36                  | Ca- <i>desi</i> -LG(Chr)6 | 4485447                 | GATATAATTTTCCAATTTTACTATTCTATTTATGAA<br>TGCTGAGACTTTATCATTGTTATTTCTTTTCAAAT<br>GTTTGCGCATGAAAGATTTGTGCAACTG   | T         | C       | CAGAAACATCTAATATAATAAAAAGAGAAAGCA<br>ACAGAAAGTTAATGGTATTATGAATTAACAAGA<br>GTTGAAAGACAGAGTGTGAGGGAGAATATGGT<br>GATGATGGTGGTGGTATGATAGGGTGTAGAT<br>TCTTTGTGAATTCGCCAACGGAGATGAAGAAAA<br>TCATCAACGGAACAAGGTAGCTTGAGGGGACC<br>ATGAGCGTTGTAGCCATAAACATCGTAAGCTTT<br>CTCCAGAACAGCTTCAAAACAGCATCTATAA |                            | NA                          |
| Ca-II-SNP1032 | 73.20                  | Ca- <i>desi</i> -LG(Chr)6 | 4514928                 | ATAGCTGTAACAACCTGCTCCTAAGAAGTTACCTTT<br>TGAGTTCAGACACTTGAAGCTTGATTGAATCTG<br>CTTGTTCTGTTCTTGAATTTGAGGTATGTA   | G         | A       | AACACAAATCATATAGAACTCATATAAACAT<br>ACAATAAATTAATATCAAAGATAATTTTATATATA<br>AATGAACAAAATAAATAATGAAATTATTACA                                                                                                                                                                                      |                            | NA                          |
| Ca-II-SNP1033 | 74.04                  | Ca- <i>desi</i> -LG(Chr)6 | 4528042                 | GGTGCAACTGGCAAATCATTTTCAACACGCACC<br>GTTGTTATTGTTGCCTTACGCTTGTGATCATCAA<br>TACAAGAACAATAGCCAACACATTATTTCATT   | G         | A       | CAAACCTGTTGGCCATGGATTATAAATAGACAA<br>TTTAGAGTATAGGATAATGCATAAACTTGATTT<br>TTAAAATTGTGATAGTTGAGTAAAAAAAATGA                                                                                                                                                                                     |                            | NA                          |

| Marker IDs    | Genetic positions (cM) | Chromosomes      | Physical positions (bp) | Flanking sequences/Forward primers                                                                             | ICC 12968 | ICC4958 | Flanking sequences/Reverse primers                                                                                    | Annealing temperature (0C) | Amplified Product size (bp) |
|---------------|------------------------|------------------|-------------------------|----------------------------------------------------------------------------------------------------------------|-----------|---------|-----------------------------------------------------------------------------------------------------------------------|----------------------------|-----------------------------|
| Ca-II-SNP1034 | 74.88                  | Ca-desi-LG(Chr)6 | 4567143                 | TTTGGGAAGGTTCTTGCCTTTCAACATACTCCTAA<br>CCATGTTCAATTATGGTTCCTGTTCCCTTTCAACA<br>ACACCATTGTGTTGAGGTGTGAAGGAGCA    | A         | G       | GGAAAACAATTGAAGATACTCAGAACTGATGGT<br>GGAGGGGAATTTACTTCCTCTGAACTTGAAAGA<br>TTTTGCACTGAAAATGGTGTGTCATGAAGTG<br>A        |                            | NA                          |
| Ca-II-SNP1035 | 75.72                  | Ca-desi-LG(Chr)6 | 4683999                 | GGTGATAGAATTC AAGCAACAGTGC GAAAACTCT<br>TATTCCTCGATTGAGACTACTATTCGTGAGGGAG<br>TTGTGTACAAC TTT CGTTCTCTCGGTGTTG | C         | T       | GGCTGTGACCAAAC TGGTTTCTAATTCTCGGAC<br>CATTGTA CTTTTGCAAATTC AATTTGAATTGA<br>TTTCCGGTTGTTCTATATGCTCCAGAGTTAGAC         |                            | NA                          |
| Ca-II-SNP1036 | 76.56                  | Ca-desi-LG(Chr)6 | 4756280                 | ACTGCTTCTCCCACAGAGCTTTGGGAAGGTTCT<br>TGCC TTTCAACATACTCCTAACCATGTTCAATTATG<br>GTTCTGTTCTCCTTTCAACAACACCATTGT   | A         | G       | CAGA A CTGATGGTGGAGGGGAATTTACTTCTCT<br>ATGA A CTTGAAAGATTTTGCACTGAATATGGTG<br>TTGTGCATGAAGTGACTGCTCCTTACACACCTC<br>AA |                            | NA                          |
| Ca-II-SNP1037 | 79.92                  | Ca-desi-LG(Chr)6 | 4763248                 | TCCTCTTTTGTATGGGATAGATACAAACAATGC<br>TATCAAAGGCGGACTATGGCGGCCAGCCTAA AAT<br>TCGCCAAATAAACATGGCATTGCTGCCATGG    | A         | G       | TTCCACCATGGTGGCACCATGGCCTTATGTGCG<br>TGGTGGATTTTGTGTCAGCCGCCATACGTTGC<br>AAGCTGAAACAGTTGTTATATCAGCCATGTTT<br>CCG      |                            | NA                          |
| Ca-II-SNP1038 | 80.76                  | Ca-desi-LG(Chr)6 | 4767445                 | TTATGGTTCAACCACCTCACCTACAAAGCCTTA<br>CAAAAGCTCCATATTATGGTCCACCGCCACCAGAT<br>GCACATATCCTTGCAGAAAATGTCGACTTC     | A         | G       | ACTTAGGAGTTGTGCATTGAGTCCAAAATAAAT<br>TAAAGAAAATATCGCGTTTAGTTAAGTGACCGG<br>GGATTTGATTTTCAGGCAATGAAATAACATAAT<br>A      |                            | NA                          |
| Ca-II-SNP1039 | 81.60                  | Ca-desi-LG(Chr)6 | 4782646                 | GATATAATTTTCCAATTTACTATTCTATTTATGAA<br>TGCTGAGACTTTATCATTGTTATTTCTTTTCAAAT<br>GTTTGCGCATGAAAGATTTGTGCAACTG     | G         | C       | ACTTTTCGCGGATAATTC AAGTCGTTGGCTAAT<br>AGCAGATCAAGGTGTGCAATCAITTTTTTTTCT<br>TCCACTTTCACTGTAGTGTTAGGAAGGAATTA           |                            | NA                          |
| Ca-II-SNP1040 | 82.44                  | Ca-desi-LG(Chr)6 | 4787645                 | AAAGATGATCCATATACCATATTTGTTGCCTTTT<br>TTTGTTAGTAGACAGAGTGT TAAAATGACTTAAAT<br>AATTTTTCACTTCCCCTCTCTACCTGTA     | G         | T       | CAAATGTATGAGGAAAAAGT GAGTATAAAAAA<br>ATTTCAACTTTATATATAGTAAAAAGGATTA A<br>AAATATATTTTCAATATATTGAAAGGTGAGAC            |                            | NA                          |
| Ca-II-SNP1041 | 83.28                  | Ca-desi-LG(Chr)6 | 4792295                 | GACCCGCTATCCAGCCTGAACCGCTCTAGGGCT<br>TTTTAAAAATGCAGATTTTGT TTTCTCCATTTT<br>CATTATAATAAACCCACGAAGGGTGTGTT       | T         | C       | AACGGAGCAAGAAAAGA CAAAAACAACAAGC<br>AAGAGCGATGGTGACGGAGCAAGAATGACCAG<br>AGGAAGAACGAAAACAATTTCTTTTTCATGATG<br>TC       |                            | NA                          |

| Marker IDs    | Genetic positions (cM) | Chromosomes      | Physical positions (bp) | Flanking sequences/Forward primers                                                                           | ICC 12968 | ICC4958 | Flanking sequences/Reverse primers                                                                                | Annealing temperature (0C) | Amplified Product size (bp) |
|---------------|------------------------|------------------|-------------------------|--------------------------------------------------------------------------------------------------------------|-----------|---------|-------------------------------------------------------------------------------------------------------------------|----------------------------|-----------------------------|
| Ca-II-SNP1042 | 84.12                  | Ca-desi-LG(Chr)6 | 4799707                 | TTCTTCATGCTGAGGATTAATACTAATAAGTAACTT<br>TGTAAGTTGAAGCTGTCTGGATGTCATTGTCAA<br>CTATTCCACAACATCTTCTTACGCATC     | T         | G       | AACAACAAAGTTTCAAGTTAGCTGCTAGTAACT<br>CAGTAAAATGATGAAACAGCACTCAGTGTCAAG<br>GTAACATAATTTCAAATGCCAAAATATAATGTA       |                            | NA                          |
| Ca-II-SNP1043 | 84.96                  | Ca-desi-LG(Chr)6 | 4807428                 | AGCAAGTCCTCTATGATTTGCATTTTCAACAAAAT<br>ATCCAGCTGCTGTGGAAGCTGTGTGAGTCCATG<br>GCCAATAGCATCTCTAGCTGAGAGATATTCT  | A         | G       | TGTCAAGTAGGACAACACTTCAACTCAACAAAC<br>TGCAACAAGAAGATAATTGGTGCTAGATGGTTC<br>CTGAAAAGGAATAAGTGATCACACTAATCACACA<br>T |                            | NA                          |
| Ca-II-SNP1044 | 85.80                  | Ca-desi-LG(Chr)6 | 4811236                 | TGCAATTTTATTCTATTCAATTTTGTATTGTATTA<br>AAATTGGCTACACTCCACGTGGAAATTTTATTAT<br>AATTTTCTGAATCGTACATAAGTACATT    | G         | C       | CAAAAAGAGAAAAGAAAGAAATGATTTTAATT<br>TGATTGATGTAATGTTACGCAAATACACGTTG<br>GAAATATCATGTGTTAACATTTGTCTAACACT          |                            | NA                          |
| Ca-II-SNP1045 | 86.64                  | Ca-desi-LG(Chr)6 | 4818263                 | ATAATGGAGTTTAGAAGGGATGGTACTACTTGAT<br>TGGGTTTGTGAGAAGGACATGCCATTAATATTGT<br>TGAAGTGCCCTTCATTGCTTGCCACCTTTG   | T         | C       | CAGTGAATGTTTTGGTCCCCTTGTGGAGCTAT<br>GGAAACCTATCACCCATACAGAAGATACAGTT<br>ATGGCATTGACAATCAGAGTCTTCTCAAGCAC<br>T     |                            | NA                          |
| Ca-II-SNP1046 | 87.48                  | Ca-desi-LG(Chr)6 | 4822927                 | ACGCTCTTCGTTGACTAAATATTTTTTCAATGAA<br>ACCAGTTTTCAATTTCTTTGTACATCCTCATTGTGA<br>TTTTTCACCTAAGTCTTCATTCTCCTCC   | T         | A       | TCATACTCATGTGTAACGTAAAACATACTCATG<br>TCTACATGATGGATATGAAGGGCCAAGGAAAA<br>AAAACATAATAAGTGGTATCAAGATATTCAACC<br>A   |                            | NA                          |
| Ca-II-SNP1047 | 88.32                  | Ca-desi-LG(Chr)6 | 4930794                 | AGTAACTGAAGTTGACGGTTAAATGACCTGTAAT<br>TTTGGGTTGATGAGTATATGATGCTGATTGAGTTT<br>GTTAGGCAGGTTCCATCCAGACATATGGTAC | T         | A       | CTAAATGTCTCCTGATATCACGGGGGAATCT<br>TTGATGAATGTTTTGTTTACACAAAATTACATC<br>TTGACCTCCACAGACATACCTACTACTATGTG          |                            | NA                          |
| Ca-II-SNP1048 | 89.16                  | Ca-desi-LG(Chr)6 | 4939660                 | TGGATATTGAGTCAAATTTCAAATAATATGCT<br>TATTCGTGTTTGGCTTATGATGCAGGTGATTTT<br>ATTAACCACAGATACGACGGACTTCAGCT       | G         | C       | CCTCTAAAAGGTTAAAGGTTGAAGGATACAAGA<br>AAAGGAAGGAGATGAAGTTAGAAATCCACACAA<br>GTTGATGAACCTCCAGGAACACTTTGGAGCTGC<br>CA |                            | NA                          |
| Ca-II-SNP1049 | 90.00                  | Ca-desi-LG(Chr)6 | 4996054                 | TGCATTCAACCTTCAATGTACATTTTTCTTGAATT<br>CGATCATCTATATGTTATTGTAGCAGTTGCCATG<br>ACCACCTGTGCTGTTGTTTCATGGCAGGG   | C         | A       | CAGAAAATACTAAATACTATTATTATGCTTATCT<br>GTAATCATGTTCTAAAGACTAACCTCACTAGTG<br>TCTCTGTAATGCACGAGAACAATATGGTCAAAT      |                            | NA                          |

| Marker IDs    | Genetic positions (cM) | Chromosomes      | Physical positions (bp) | Flanking sequences/Forward primers                                                                              | ICC 12968 | ICC4958 | Flanking sequences/Reverse primers                                                                                                                                                                                                                                                                                                                                                                                    | Annealing temperature (0C) | Amplified Product size (bp) |
|---------------|------------------------|------------------|-------------------------|-----------------------------------------------------------------------------------------------------------------|-----------|---------|-----------------------------------------------------------------------------------------------------------------------------------------------------------------------------------------------------------------------------------------------------------------------------------------------------------------------------------------------------------------------------------------------------------------------|----------------------------|-----------------------------|
| Ca-II-SNP1050 | 90.84                  | Ca-desi-LG(Chr)6 | 5007515                 | CCATTTCTGGCATTGAATATCCATGAAACATGCG<br>TCGAACTGATGAGGTGGCTTCAGCGAAGAGATAG<br>CATCTTTCCACTGCTAACACAAACCACATC      | T         | A       | TGTCTCTTAGCCATCTTCTTTTTGGGAGGAAAA<br>TTCTTATTGTTGATGACAATGGCGTGAACCGCG<br>CAGTAGCAGCCGGTCTTTGAAAAAGTATGGA<br>GC                                                                                                                                                                                                                                                                                                       |                            | NA                          |
| Ca-II-SNP1051 | 91.68                  | Ca-desi-LG(Chr)6 | 5010930                 | GCTCCAAAGTATCCATTCTTTAATAATCCAACCTT<br>GTTGCTTCTCAAATTGTTCCCTTTTCCAGAAATGTAAC<br>ACTCTTACAGCATATGCAACACCACCTTGT | T         | A       | GGTGATAGTGCAACTCAAGTGCAGAGATGAAT<br>CTAACTTGTAAAACCTACAGAGAACATTTGCTA<br>GGTACACAGAAAGGACAGCTTTTGAGAGGCCCT<br>CT                                                                                                                                                                                                                                                                                                      |                            | NA                          |
| Ca-II-SSR330  | 92.52                  | Ca-desi-LG(Chr)6 | 5013080                 | TTGTTTAGCAGTGAATTAACGGT                                                                                         | (TA)10    | (TA)11  | TATGAACACAAAGCATATAAAAGTTGTATTCT<br>GCTCAGTGGAAAGTGAACCATACCTTTCTCTTC<br>TCTACATTATTAACCTACCTTACTAAAAGTAT                                                                                                                                                                                                                                                                                                             | TCTGCTCAGT<br>GGAAAGTGGAA  | 59.19                       |
| Ca-II-SNP1052 | 95.04                  | Ca-desi-LG(Chr)6 | 5022799                 | GATTAACATGAGTATATTCTATCTCACTTGCAC<br>CAACTATTAACCTCATGTATTCCGTCATGTGTA<br>ACATGTGTGATCAGTGACCCATTATAACTC        | A         | G       | TTAGAAAGATATGATGTAAGCTCAATGTATTAA<br>TGTTGGGAAAATCAGTTGACCCGACCGAAGT<br>CGAGCCACTCGAATAGGAGAATTTGATAGTTG<br>GA                                                                                                                                                                                                                                                                                                        |                            | NA                          |
| Ca-II-SNP1053 | 97.56                  | Ca-desi-LG(Chr)6 | 5054753                 | TTCTCTCACTTTGTTGCCATTTCTTTTCTCCATC<br>GCTTCTTCTTCAAATTCACCTCCACTACTCCTTC<br>GAAGATCTAAAATTGGAATTTCACTCTCA       | G         | A       | AGTGTCTAGTCACTGTATATATATAGATGTA<br>CTTGAGAGAAAAACAACATAATCCACAT<br>ATCGAAATACGGTAGAAGAAAAGAAAATGACTA                                                                                                                                                                                                                                                                                                                  |                            | NA                          |
| Ca-II-SNP1054 | 98.40                  | Ca-desi-LG(Chr)6 | 5069429                 | TAATGTGGGTCACTAAGATAATTGAGTCCTAATTG<br>GTAAAGGTGGTCTGACCAAACCCCAATCAGTGTC<br>ATGATTGTTCTCCTTTACCTGTTATTCCATG    | T         | C       | TAATAAGTGCAATTTATACAAAATATTTCAAGTT<br>TTGTACAATATCATTAAATTAGATCATGCATGACC<br>TTATTCACGGTGGACATTTAGATTATTCAG                                                                                                                                                                                                                                                                                                           |                            | NA                          |
| Ca-II-SNP1055 | 100.08                 | Ca-desi-LG(Chr)6 | 5557511                 | GATTAACATGAGTATATTCTATCTCACTTGCAC<br>CAACTATTAACCTCATGTATTCCGTCATGTGTA<br>ACATGTGTGATCAGTGACCCATTATAACTC        | T         | C       | CGAGAAGAGTTGAGTGCAAAATGAAGGGACCC<br>GAAATATCAAATTGAGAGAAGGCAGTAGTAGTC<br>TCTGCAACAACAATAACACAATATGGCTTTCT<br>CTGCAACAATTACTTCTACGCACTATTCTCCCC<br>AATTCTTTCGCGTTCCATCTCCGTTCCACTTT<br>CTCAAACCTCACACATCACTCTTTTTCCGGTCTT<br>CAACACCAATCCTCAATCGCCGAATTCGTACAC<br>CTAAACCTCTCTCAATTCCTCACTTTCCATTCT<br>AGTTGACAAAGCAAGATTCTGCTTCTAAAAA<br>CTGCAATTTGAAAACCTCAAACCAATAATATTAG<br>AGATGCGTGCTTCAAGGAGAGAAAGACAATGC<br>CA |                            | NA                          |
| Ca-II-SNP1056 | 100.92                 | Ca-desi-LG(Chr)6 | 5624131                 | TTCTCATGCAATTTAGTTTAGTGACTTCTATTCTCA<br>CTGACGATCATTCTGCATGGCAATTTGCCCAAAT<br>GCATTGGCCCAATCTTTGTCCAGATGTA      | G         | C       |                                                                                                                                                                                                                                                                                                                                                                                                                       |                            | NA                          |

| Marker IDs    | Genetic positions (cM) | Chromosomes               | Physical positions (bp) | Flanking sequences/Forward primers                                                                           | ICC 12968 | ICC4958 | Flanking sequences/Reverse primers                                                                             | Annealing temperature (0C) | Amplified Product size (bp) |
|---------------|------------------------|---------------------------|-------------------------|--------------------------------------------------------------------------------------------------------------|-----------|---------|----------------------------------------------------------------------------------------------------------------|----------------------------|-----------------------------|
| Ca-II-SNP1057 | 101.76                 | Ca- <i>desi</i> -LG(Chr)6 | 5663010                 | GATTAAGTATGAGTATATTCTATCTCACTTGCACCT<br>CAACTATTAACCTCATGTATTCCTGCATGTGTAA<br>ACATGTGTGATCAGTGACCCATTATAAAGT | G         | A       | AAAGTACAAAAAAGTGTGTTCTTTATC<br>TTTCTCTTCTCATCTCTCTATCTAAAAAAGT<br>TCTATTAGCTTCTCATTCCACTACCAATTTTC<br>TCTTATCA |                            | NA                          |
| Ca-II-SNP1058 | 102.60                 | Ca- <i>desi</i> -LG(Chr)6 | 5722880                 | GAATTTTCGATTTGTTGTTGTATGTTAGGAAA<br>TGATGTTTCAACTTGATTCATCTTGTATATTT<br>ATCCTCATCGACCAATTCTGCAGATCTT         | C         | A       | TTTTAGGAATTACTGAGTTACTATAATGATAATT<br>GATAACTGAGGAGTTGAAGTGTGTACGAGGT<br>GCGAGATTAGTATTGAAGATGAAACAAGT<br>C    |                            | NA                          |
| Ca-II-SNP1059 | 103.44                 | Ca- <i>desi</i> -LG(Chr)6 | 5737988                 | ACTTCATGCACTTAGAATTTCTCCTGCCTCTCCA<br>ACATAGAGTGGATAATACCTAGATAACTCCTCAA<br>CTTAGTGGCATACTCCACTACTGACATATT   | C         | T       | CAATTAAGTGGCTATATTCAAGAACATGTTCC<br>TAGTCAAGTATTTCTTAAAGACATCCGCTATA<br>GGAAGGAAATGGAATTTGTCAAATGGAACAG<br>GG  |                            | NA                          |
| Ca-II-SNP1060 | 104.28                 | Ca- <i>desi</i> -LG(Chr)6 | 5748573                 | TTTCACTAATATAATCGATTTGGCAATGAGCTAATT<br>TCTCACTGTAACCTCAGACACTTAATCAAATCGATT<br>TGCCAATCGACTGATTTGTCCTGTAAGT | A         | C       | ACTAATCAATTAGTTAATCGATTGCATGAATGAA<br>TTAGTTCATCATTATCAGAAACATATTGCATAA<br>TCGATTGGCAGATCGATTTAATTAATATCT      |                            | NA                          |
| Ca-II-SSR331  | 105.12                 | Ca- <i>desi</i> -LG(Chr)6 | 5762498                 | CGTTTTGAAAAATCGGTGGT                                                                                         | (TG)7     | (TG)6   | GTTCTTATTCTCCCTCTCAGTTCCCTCCAGA<br>ACATGATTTCCAAACCTCCAGAAGTAAAAAC<br>AATAACAAACAAGTCAAAATCAAACTCAAAAT         | TCTCAGTTC<br>CCTCCAGAAC    | 59.84                       |
| Ca-II-SNP1061 | 105.96                 | Ca- <i>desi</i> -LG(Chr)6 | 5766119                 | AAAAGGCTTCTCCTCATGCTGCCATTTTTGAGT<br>ATTTTTACTTTATTTCAAACCGCTTGAGTATTTATT<br>AGCATTACTAGGGAACACACAAGTATTTT   | T         | G       | AACAAGTGGAGAAACCGTTAAAAAAGTGCAG<br>AAAGAGAATCCTCTTTTCTCCTACTATTCAACC<br>TAACGAAATAAAAAAGCTTCTAAACATAAGT        |                            | NA                          |
| Ca-II-SNP1062 | 107.64                 | Ca- <i>desi</i> -LG(Chr)6 | 5794645                 | CCACTAGTTTATAGAGGACAGCTTATAGCGTGTGA<br>ACTCATATGCCCAAATAGAGCTTCTGGTAACCA<br>TTTTTTGTTGGAACCTACAAGTGTTC       | T         | C       | TGCTATAAAAAAGATAATTTAATTAATATATACA<br>TTTTTTCAATTAAGATGATGAAGGTGAAATGA<br>GAAAAGATGTGATATGTTATAAGCTCAAACTCT    |                            | NA                          |
| Ca-II-SSR332  | 109.32                 | Ca- <i>desi</i> -LG(Chr)6 | 5830798                 | GGAGACCTTCAATTCGATG                                                                                          | (TAT)11   | (TAT)10 | ACCAATTTTATCAGATGGTGGAAAAGGTGATAC<br>AACCTGTTACAGAAAGAGTTGAGATAGTTTTTA<br>CAATTAATCAAACTTAAAAATAAATTAATAA      | TCAGATGGTG<br>GAAAAGGTGA   | 58.63                       |

| Marker IDs    | Genetic positions (cM) | Chromosomes               | Physical positions (bp) | Flanking sequences/Forward primers                                                                          | ICC 12968 | ICC4958 | Flanking sequences/Reverse primers                                                                                                                                                                             | Annealing temperature (0C)      | Amplified Product size (bp) |
|---------------|------------------------|---------------------------|-------------------------|-------------------------------------------------------------------------------------------------------------|-----------|---------|----------------------------------------------------------------------------------------------------------------------------------------------------------------------------------------------------------------|---------------------------------|-----------------------------|
| Ca-II-SNP1063 | 110.16                 | Ca- <i>desi</i> -LG(Chr)6 | 5856064                 | CTTGATAATGAGTTGTTAATCCTCTAACCTTTATTT<br>TAGTCCAAGAGACCTTGTGTTTTAGTCTATACT<br>TAAATATATGATTAGCCTTATAAATATG   | A         | C       | CAGCCTTATTTC AAGCACAGAGCAAGTCACAAA<br>CCTCAATGTGGACAACGGTGGTACTTACTTATC<br>AATGAAACCAACAAACAATAATCACACCTATGA<br>CCTTTGAGTTGGAGCAGTTTGAACATACGACTA<br>AAGCAAACCCTGATATCACTATTTTACGTAATG<br>AGCAAAAAATTTCACTTCAA |                                 | NA                          |
| Ca-II-SNP1064 | 112.68                 | Ca- <i>desi</i> -LG(Chr)6 | 5970165                 | ATACTGTTTTGTGTGTTGAGCATAACTATGACTCT<br>ATCTGATGTTGTTGGAGGTTTGTATGTAACCTTT<br>GGTGAGCTTTGATTTAAGGCTTTGAGCTA  | A         | G       | ACCTGGTTTAGCCATTTTCAACTACTATCCCAA<br>CCATCCAATGAGGTCACCACCAACACCTCCAC<br>CATCTCCACCAGCTTGGGACAATGTTGATTCAA<br>GG                                                                                               |                                 | NA                          |
| Ca-II-SNP1065 | 113.52                 | Ca- <i>desi</i> -LG(Chr)6 | 6096482                 | GCATTAAGTGCATTTCCATAATGTGACAGTCATT<br>TGCTTAGACTGGTTTTAGATCAAATATTTGTACTA<br>TTATTTATATAGATTCTAGCTAGGTTTGA  | A         | T       | TTCAATATGAAAAATGAAACACCTTTTCTATACA<br>TGGGACAGAGGATACCTTCTTTCTTTTATAT<br>CACCAAACCTGCATGTGATGAGAGAACAATT                                                                                                       |                                 | NA                          |
| Ca-II-SNP1066 | 114.36                 | Ca- <i>desi</i> -LG(Chr)6 | 6118607                 | GTGTATGAATTTTCTAAATATCATTGTTATATC<br>AACGTGTACAATTCTGAGTTTTTCATCTCCAGGAG<br>ACTTAGTATTATTAATTAAGGTATATTT    | G         | A       | ATCAATATTCAATAGTACCTTTGTCCCAATTTAT<br>TAGCCAAAAAATGTCTCTAAATATAACATTTCAT<br>TTCAAATTCCTAATATATATTATTTTTTTTC                                                                                                    |                                 | NA                          |
| Ca-II-SNP1067 | 115.20                 | Ca- <i>desi</i> -LG(Chr)6 | 6123476                 | ACCTTCTCTTTTGTCTATATCCACTAAATCCAC<br>TTTATCCTATGATAAATGTGCCCTACTTACAACA<br>GTTTTGTCTTAGTGTTCCTCCATCAAA      | G         | T       | ATAATAGTCCAAGTGTGGTGGTCTGCAATGCC<br>TCTAATTCATAATGCATGGCTTGCTTGCAACAT<br>TCATGCTTAGAGGATTGAGTATAGGTAAGGAT<br>T                                                                                                 |                                 | NA                          |
| Ca-II-SNP1068 | 116.04                 | Ca- <i>desi</i> -LG(Chr)6 | 6149552                 | TGATAGTGGAAATTTAAAAGAATCGGTTATTCGC<br>TTGAATATTGGTGTCAATTTCAATGTTCTATGTCTTC<br>TCACCCTAATCCTTTAATACCTAAAATT | C         | T       | TGAAAAAGAGTGTCTTAACACTTCTCTCAA<br>GTAATAACACCTTAATTTATCTCAAAGTAATAAC<br>ACCCTAATTTAAGTCTGCAAACGAACCTCAAAGAA                                                                                                    |                                 | NA                          |
| Ca-II-SNP1069 | 116.88                 | Ca- <i>desi</i> -LG(Chr)6 | 6270775                 | CATTCTCGTACCTTAAATAGTTTTGTCTCGAAA<br>CTGGCATCAGAGAAAAGTTGAGTATTGCTCTCTCA<br>TTTTGTCTTAGTTCCTCAAGTGGTGTCTC   | T         | C       | ATCTTTTGAAGTACCTCCGGCAAGAATTGAAGA<br>TAGAAAAAGTCAAGTTGCTTCGCAACAAAGAAAT<br>TCCCTTGGTGAAGTAGTTTGAATCAAGCCAC<br>T                                                                                                |                                 | NA                          |
| Ca-II-SSR333  | 117.72                 | Ca- <i>desi</i> -LG(Chr)6 | 6378408                 | TTTTAGTAGTCGTGTGGCAATG                                                                                      | (AT)6     | (AT)7   | TATTCAAATAATACAATCGGTCACTTATTGTAAA<br>ACATTTATAATACTAACAACAAAACCGTGAAAA<br>GAAACATTCATAATACTCTAATATTTTGATA                                                                                                     | AACAAAAACC<br>GTAAAAAGAA<br>ACA | 57.92                       |

| Marker IDs    | Genetic positions (cM) | Chromosomes               | Physical positions (bp) | Flanking sequences/Forward primers                                                                           | ICC 12968 | ICC4958 | Flanking sequences/Reverse primers                                                                                                                                                                                                                                                                            | Annealing temperature (0C) | Amplified Product size (bp) |
|---------------|------------------------|---------------------------|-------------------------|--------------------------------------------------------------------------------------------------------------|-----------|---------|---------------------------------------------------------------------------------------------------------------------------------------------------------------------------------------------------------------------------------------------------------------------------------------------------------------|----------------------------|-----------------------------|
| Ca-II-SNP1070 | 119.40                 | Ca- <i>desi</i> -LG(Chr)6 | 6386917                 | CTTGATAATGAGTTGTTAATCCTCTAACCTTTATTT<br>TAGTCCAAGAGGACCTTGTGTTTTAGTCTATACT<br>TAAATATATGATTAGTCTTATAAATATG   | A         | T       | CTTCAATACAAACACAAAATTCACCCCTCATAAA<br>AAATGGATTTTCAGTAGCAATGAGagTGAAGAAag<br>TGAActGTATCATGCTCAAATCCATTTgTACAAAC<br>ATTtATaAGTTTTATAAGCTCTGCTGCTCTCAAA<br>TCTGCTGTGGAACCTGGCATAGCAGATGcAATC<br>CACAAccATGGAAAACCAATGACTCTTAAATGAA<br>TTAGCTTCATCTTTGAAACTTCACCCCTTAAAG<br>TTaTATTCTCTATCGTTTTCTTACCTCTTTAAACA |                            | NA                          |
| Ca-II-SNP1071 | 121.08                 | Ca- <i>desi</i> -LG(Chr)6 | 6402258                 | CATGCTATTGGTTTTCTCGCATTTCCTCTCTAG<br>GTTGATTGCAACATTATTTGGTCAAGTAATACTAT<br>ATGTGACGTCCTATCAAATGTGGTCACGTA   | C         | T       | AGTTGAATAATTTTGGACGCTCTGATTCAGTGA<br>CCTATTATGTTACTAACTAAGGTGATGGATATT<br>CATGCATGCATTGGTGGTCTTAATCTAGTCGCG<br>A                                                                                                                                                                                              |                            | NA                          |
| Ca-II-SNP1072 | 123.60                 | Ca- <i>desi</i> -LG(Chr)6 | 6611519                 | CCTGCTTCTCTCAGGAAGGATGCACTCTTCGTGA<br>TCTCACGCAATGGCTTGTAGTGACTCTCACAGTG<br>TTGTACACCCATGCTCCGGCCACCGCTCCTA  | A         | G       | ACCAATAACAGGAGCATCAATGAATCCAGCTAG<br>AAGTTTAGGACCTGCATTTGTACACAATAAATA<br>CAGAGGAATATGGATATATTTGGTGCACCGAT<br>T                                                                                                                                                                                               |                            | NA                          |
| Ca-II-SNP1073 | 124.44                 | Ca- <i>desi</i> -LG(Chr)6 | 6699208                 | AGCTGGAGTTTTAAAGGTATGTGCAAATCTTG<br>CAAATGTATGCCATTGCACCTTTGGGGGACTAGAA<br>TAACCTGTACTTTGTATTTTACTGCTCAAA    | C         | T       | AAAGTTGACAAAAAATTCAGTTTACCTTTGTTC<br>TGATACTTGTAAAGCCACCATTATTTGCCGTTG<br>AAACAACCTGGAATACACACAAGACTCTATT                                                                                                                                                                                                     |                            | NA                          |
| Ca-II-SNP1074 | 125.28                 | Ca- <i>desi</i> -LG(Chr)6 | 6719297                 | CTTGATAATGAGTTGTTAATCCTCTAACCTTTATTT<br>TAGTCCAAGAGGACCTTGTGTTTTAGTCTATACT<br>TAAATATATGATTAGTCTTATAAATATG   | C         | T       | GACTAAAATAAAAAAATAAGAAAACAAAAA<br>ATATTTACATAAATCAAATCAAACAAATCTTT<br>TTTAAATTCAGTGATTAAATTAATAAATAAC                                                                                                                                                                                                         |                            | NA                          |
| Ca-II-SNP1075 | 126.12                 | Ca- <i>desi</i> -LG(Chr)6 | 6725031                 | TTTTGAAGTATGAACGTTTCCCACCACTAATGGCT<br>TAATATTCATGTCGCTCTGCATCTAAATCATCTCAA<br>GACTATTGTCATTGATATGGGCTTGTCA  | G         | T       | AGGTCTTTTAgTTAAGATCAAAAATTAactCAAC<br>TTCAAAATGAGGGATTTAAGTTTCAAAAATTAactC<br>AACTTTCGTCaAGTTTCAAAAATTAactCGactT                                                                                                                                                                                              |                            | NA                          |
| Ca-II-SNP1076 | 126.96                 | Ca- <i>desi</i> -LG(Chr)6 | 6735402                 | TATCTTCAATTTTTCTAGTTTTTAATATATTTATTCT<br>TGGTATTTTTTAACTTCTGGATACAATAATTTGTTT<br>TTTTTTAAATAATATTCTTTTGAAGCT | C         | T       | GGGTGAGAATTGAGAAAGCATGAGAAAATAAA<br>GGAATTGAAAATGTCAAATATCAAATAAGAAAA<br>ATTATTTTGTGGTTTAAAGAAATTTGAGAGTGTTC<br>A                                                                                                                                                                                             |                            | NA                          |
| Ca-II-SNP1077 | 127.80                 | Ca- <i>desi</i> -LG(Chr)6 | 6741902                 | GAGGAACGGGTGGCACGAAAAGGGAAGAATGG<br>TTAGGACAGAGTTTTTCTTCTCCGTCGGTTCGA<br>ATTGACACGAAAACGAATTTGAGGAGATGCG     | C         | T       | TTATATTTTgATTGTATCATAAAACTTGTCTAT<br>TTTTAAACTCTGTTTGAAGACGCATTATTTTTTC<br>CTTATGCTCCCTCGTCTATCGCAGGCGAAGCT                                                                                                                                                                                                   |                            | NA                          |



| Marker IDs    | Genetic positions (cM) | Chromosomes      | Physical positions (bp) | Flanking sequences/Forward primers                                                                            | ICC 12968 | ICC4958 | Flanking sequences/Reverse primers                                                                                 | Annealing temperature (0C) | Amplified Product size (bp) |
|---------------|------------------------|------------------|-------------------------|---------------------------------------------------------------------------------------------------------------|-----------|---------|--------------------------------------------------------------------------------------------------------------------|----------------------------|-----------------------------|
| Ca-II-SNP1078 | 128.64                 | Ca-desi-LG(Chr)6 | 6744604                 | CCAAAGCGAATATGCTGTTGATCTTCTTTTCATATGTAGCACTAGCAGTGAGCACCACTGCACAAGCAA<br>TACGTCTTGCACTCTTTTTTGGTCAACATC       | G         | C       | TATGTGAGTATATATTCATATTCATAGAGATCGA<br>ATCTGATCTTTTTGTGGGAGAGAAGAAATTCCTT<br>GTATAGTTGATTATGTAGGTTGAAAAGATACA       |                            | NA                          |
| Ca-II-SNP1079 | 129.48                 | Ca-desi-LG(Chr)6 | 6753701                 | AATGTTTATACTTGAGATTAATGAATCTTATTGTAC<br>AAGTATGGTGAATTAGCATGCATCGGTGTATGTC<br>GTGTATCTCAGATTTGAGTCATTTTATTGG  | G         | A       | TCITTAAGAGGGGTACAACAGTTGCCTAGTGC<br>TTATATACTTTGTCTTCTGTCATGAGCAAGCTG<br>TTGCCAGTATGCCATCCATGCATTATGGTCTCT<br>A    |                            | NA                          |
| Ca-II-SNP1080 | 130.32                 | Ca-desi-LG(Chr)6 | 6764579                 | TATTTCTTAAATTATTTATAAAGTTATTTATTATCTT<br>TTAAATGTTTACAAAGTTACTTTCTATCTTTTTTT<br>CTCTCATTAAAGATTTTTATCTTTTAA   | T         | C       | TGAAATCTTATATAAGAATGACATAATTCTA<br>CATTAACTTGTCAATAAGCATTAAAAATTCTTG<br>TCAACATTTTAAAGGGATAATTTGTAGACAT            |                            | NA                          |
| Ca-II-SNP1081 | 131.16                 | Ca-desi-LG(Chr)6 | 6783139                 | AGTGTGATGACAGTTTTATGATTCCATCAAGCCT<br>CAATTTATCTTCTCTCGGTACATCAATAGATAT<br>CTGAACAGGAGTTCCATTGCGTACTCCT       | T         | C       | ATACTGCACTACTTTGGAGAGATTAGGTCTAGG<br>AAATCTTTCAACTGATATTTGAAAAATAAGGC<br>GTCTGTAATGGGATTGCGATTTACGAAAGCAG<br>CG    |                            | NA                          |
| Ca-II-SNP1082 | 133.68                 | Ca-desi-LG(Chr)6 | 6790995                 | TGGTTTTCTTTATTATGAGAACTTTCTATGAGAGA<br>TTTCATGGTAATTTTCATTGGTGGGTATGTAACGGG<br>CTTTTGATATTCTAGAAATAGAATATTTT  | G         | A       | TCAAAAATAAGGACTTTATTGATATAGACATGAG<br>TTCAATTTGCTAAGACATGTAGACAACATGTACA<br>TGATAACGCATCACCTAACTGAAATCGAAAGAG<br>A |                            | NA                          |
| Ca-II-SNP1083 | 134.52                 | Ca-desi-LG(Chr)6 | 6800800                 | TAACTTAACTAATTTGGTTAACTAAATGAGGTAGTT<br>ATAGCGTGTTCACAAACAGTTTCGAATTATTTGTG<br>CAACCATCGTCAATTTGATTTTTTTGTTTA | A         | G       | GCAAAAACTAATAAGCACCTCAGTTCGGCCAG<br>CCAATTAGTTATGTTACAGATGAGCCATGAGTG<br>AGTTAGATCTTGAGTTGGGGAATGTTGGAATAA<br>A    |                            | NA                          |
| Ca-II-SNP1084 | 135.36                 | Ca-desi-LG(Chr)6 | 6815781                 | TCTTTTTGACCTTATGAGCAATTCATGGCGTTTC<br>TGAGATCACCCATTTTCGCATAACTTGCAAATTTTA<br>GCATTTTGGTCAGCGTTACGTTGTGAGTG   | A         | G       | TTCATCTTCTTCAAACAGCCTCGTACACCATCT<br>CTGCTACATTCCAAATGAACATTTTTTGTGCGTA<br>GCAGTGTGCGGCTCTTTCATCTTTAGCCAACA        |                            | NA                          |
| Ca-II-SNP1085 | 136.20                 | Ca-desi-LG(Chr)6 | 6825600                 | ACCCAAATCGATCATGTTTGGGTTGGGTTAAGTTC<br>TAAACCTGATTTTTTTCATTTAACCCGAACCTGACC<br>CAACCCGATCAAGAACGGGTTGGATTGACG | G         | A       | ATTGAAATTTTATAATTTTTGAGACATTCAAATA<br>TTAAATATATTTTTCATTCAATATATTTCCCGTA<br>AAATAAAGAACATGTTATTATTTATGTATGAC       |                            | NA                          |

| Marker IDs    | Genetic positions (cM) | Chromosomes               | Physical positions (bp) | Flanking sequences/Forward primers                                                                           | ICC 12968 | ICC4958 | Flanking sequences/Reverse primers                                                                             | Annealing temperature (0C) | Amplified Product size (bp) |
|---------------|------------------------|---------------------------|-------------------------|--------------------------------------------------------------------------------------------------------------|-----------|---------|----------------------------------------------------------------------------------------------------------------|----------------------------|-----------------------------|
| Ca-II-SNP1086 | 137.04                 | Ca- <i>desi</i> -LG(Chr)6 | 6839524                 | TGTCATATTTAGTGTCAACCCCGATACCGACGCT<br>AGTTAGCGTTGGTGTAGCGTCGGCTGAGTCGACG<br>CTAAGTTAATTTTTATTTTCTATATTAAT    | T         | A       | GGCTCGTGTTCGAATTAGAATCCGATCTTACTA<br>ATATGATTTTTATTAATAATTTAATTTTTAAAAAT<br>CATAAACCTAGCGTCGGCCCGTCGACGCTAAC   |                            | NA                          |
| Ca-II-SNP1087 | 137.88                 | Ca- <i>desi</i> -LG(Chr)6 | 6843142                 | GCATGGAAGTTCATCCTCGGTGGGATTCTCTGT<br>CCTATGCTCCCCAAAATCAAAGAAAAAATATAT<br>TAAACTATTATCCTTGCCATCCATTCTGTCT    | C         | T       | GAGTGTTTTTAAATTTTATACAATTTAG<br>GATTTTTGGTGTATAAAACACATGGCAATGTG<br>GGAAAAAGTAAAAGGTGACAAGGACGAGAAAA<br>T      |                            | NA                          |
| Ca-II-SNP1088 | 140.40                 | Ca- <i>desi</i> -LG(Chr)6 | 6850697                 | AACTTCAGTCACAGCTCCTTTTTCTCCAATCTA<br>TAGAAGCAGGAAGGTTGTCACAATCATCATCA<br>TCTTTAAGTTTTCTATCATCCAATTAGAT       | G         | C       | AAGAGAACTCACCTTTGCAACATCGTTGGGT<br>CTCAACAAGTTTGGTGATATGAGTCCTGAGGA<br>GTTTAGTAAAACATACTTATCAGAGATTCAGAT<br>GA |                            | NA                          |
| Ca-II-SNP1089 | 141.24                 | Ca- <i>desi</i> -LG(Chr)6 | 6853416                 | CATGTAACATTGCATCTCGTACTTTTTGGTTGCGA<br>TTTCTCAAAAATGATCTGTATTGATCAGATGTTAG<br>GTAATTTGAACCTGTAATTCGATGTGTGAT | C         | G       | CAAAAAATTTTTGAAACATTGACAGTTTCTAGA<br>GCCAATTTCTTGAAGTAAAGCAACTATTCATTA<br>GTTAATTTCTTTGAATTGCAATACCAATTT       |                            | NA                          |
| Ca-II-SNP1090 | 142.08                 | Ca- <i>desi</i> -LG(Chr)6 | 6866046                 | AAATACTAACGTTTCTATCATGAGAATGAATATGG<br>CCACAATTTTTTTGGGTATGGCCTATTTTTTTTA<br>TAATTAATATAAGTTTACATTAGTTGGGT   | T         | A       | TTACAAGACTTTTAATTGATTCACACTATTGATG<br>TAATAATTTTATAACGTATATCTTCTTTAAGTC<br>TTGAATTCATCTTAATTTAATGAACTACATA     |                            | NA                          |
| Ca-II-SNP1091 | 142.92                 | Ca- <i>desi</i> -LG(Chr)6 | 6872681                 | GGATCCCATTACCATCTTTCACAACACTACAAAA<br>CTTAGCTACTTCTTCCATTTTTTCAATTACCATT<br>TAACATACACTATCTGTATCACACTCA      | A         | T       | TACAACCAATAATATTTGTTGTAGTGGTGG<br>GTTAATTACCTGAAAAATGAAGAACAAAAACA<br>AGGAAGGGAATAAGAATATGTAGTGTTGAGA<br>T     |                            | NA                          |
| Ca-II-SNP1092 | 143.76                 | Ca- <i>desi</i> -LG(Chr)6 | 6875034                 | CTGGAGGAGCTACATCTTCTGCTGGGAGATTGGT<br>GATTGAATATGGTGTTTTGAAGGTATAAATCTGTC<br>AAAAGTCTCATATTTTTTCACTCTTTTGAT  | A         | G       | GGTAATGACCGCTGTGAGGCCAACAGCCTGT<br>TTAAAAGAAACAATCAAATCATTCTTAGCCGAA<br>CACATAAAATCGAAAAACTAGCCACAATGAG<br>TC  |                            | NA                          |
| Ca-II-SNP1093 | 144.60                 | Ca- <i>desi</i> -LG(Chr)6 | 6886340                 | CATCCACTTTACATTATTATATTGGAATCAACAAAT<br>AGTTTCCAAAATAGTTTGGTAAACTTGTCTTCTT<br>CTTTCATTTATTATTTTTCTTAATCTG    | C         | T       | GAGGATATTTGCTCTTCAATGTTATTGTGACAT<br>AGGGATATTAATTTAGCCAATATACTCCTCC<br>GTCCCTAAATAATTATCATATTTGTTATTTTAT      |                            | NA                          |

| Marker IDs    | Genetic positions (cM) | Chromosomes               | Physical positions (bp) | Flanking sequences/Forward primers                                                                              | ICC 12968 | ICC4958 | Flanking sequences/Reverse primers                                                                            | Annealing temperature (0C) | Amplified Product size (bp) |
|---------------|------------------------|---------------------------|-------------------------|-----------------------------------------------------------------------------------------------------------------|-----------|---------|---------------------------------------------------------------------------------------------------------------|----------------------------|-----------------------------|
| Ca-II-SNP1094 | 145.44                 | Ca- <i>desi</i> -LG(Chr)6 | 6896141                 | TATTGCATTTAATAACTTTTTAGCATTGTTCTACTT<br>AGAATTTTATATCTGGTTTATGCTTGACTTAAGTAA<br>AGTTCTTCACTTATAACTTCATATATCA    | C         | A       | ATATACTGGAGCACTTCCTCCAACACCTCCTAA<br>AGAACAACCTTATGGACAGGTAAGTAACCCACAT<br>AAGATATATTTCTACATGGAAGTTTCAATTTCT  |                            | NA                          |
| Ca-II-SNP1095 | 146.28                 | Ca- <i>desi</i> -LG(Chr)6 | 6901525                 | GGATTTTCATACCTATTTACTTTCCTCCTTTTTTTGG<br>TTTTAGACATACCAAATAAAAAGAAGCTTGGATGTT<br>GGAGCAAACCTTTTTCATTGGCAATCTAGA | T         | C       | ACTCAATTTCAAATAAAAAATCCTAATCATTAA<br>AAATGTTGTTACATATCAAGTACATTTGAATTTA<br>TTCAAAGAAAAAGTTGCATATTTGGTGACTC    |                            | NA                          |
| Ca-II-SNP1096 | 147.96                 | Ca- <i>desi</i> -LG(Chr)6 | 6904308                 | CCTCCGCCGTGCGCGCCGCAACAACCTCCGCGCG<br>TCACCGAAGCTCTAATCGAAAAAACGAGGAGCA<br>AATCATCACCAATTCACATCCCCGGTCTTTC      | A         | C       | AAATAGACTTGAATGCGCGAAGGTTGAATCTCT<br>GGATAGCGATAAGAACCGGAGGATCGGAGCAA<br>TTTAGGGTCCGATTAGGTCATCATGAAGAG<br>GA |                            | NA                          |
| Ca-II-SNP1097 | 148.80                 | Ca- <i>desi</i> -LG(Chr)6 | 6909604                 | AATTTTATTTGTTGGTTTTATTATGGCTGTGTCG<br>AGACATCATATAACACTACAAGGAGGATTCATTA<br>GATGACATATGATTGTAAGTAATTTT          | C         | G       | AACTATTATTTGGTGAATGTAATTTGAGTGAA<br>AATACACAACCATCATCATTTAATTTTTGAGAAT<br>TTCAAATGATATTTGAAAAAATACCTTT        |                            | NA                          |
| Ca-II-SNP1098 | 149.64                 | Ca- <i>desi</i> -LG(Chr)6 | 6917240                 | TTTCTTTGTTGTTTTCAAAGTGGTACCAATCATTT<br>ATCGCTCACTTGTAGGACAAGGAGGACTATGAG<br>CTTTTACTTCGACAGGTACCATGATCCGTT      | G         | A       | TGTGAAAATTTTATATTATCTTGTGCGGAAATTC<br>TACAGCAAACCATTATGATAGGTGGACCACAGT<br>GCACCAGTACTGAAAATCACTTGAACCTCCAA   |                            | NA                          |
| Ca-II-SNP1099 | 150.48                 | Ca- <i>desi</i> -LG(Chr)6 | 6924077                 | GGTATTGTTACTTTTTTAGCTTATACTGCTTGAC<br>GTTAATGCTTATTTCTGATACTTCATTATCCAATTA<br>TTAGCAATGCTTAAAAATGTCTTCTCTCA     | T         | G       | TAAGTAAAAATGGTGTTCAAAAAGTTAATGTAT<br>CTGGTTAGAAAATTAATCAGACACATCAACTT<br>TGAGTTAACTTTTTGCTTATATTTTATGAAAGT    |                            | NA                          |
| Ca-II-SNP1100 | 151.32                 | Ca- <i>desi</i> -LG(Chr)6 | 6927099                 | ACTCTCAACAACCTTCGACACCAAGTCATGTATGT<br>CACCTCTCATCACTCTCAAACCTCCCTTATGAAGTT<br>GTTTTTCTTTTTGTTTTAATGTTTTTGCG    | G         | T       | TGACAGCATTGACTGTCAATTTGCATGTCAATTG<br>CAATTGCATCACCTTTGAGAAAATTTGGCATCTA<br>TTGCATTGCGCACCAACCTTAAAAATAATAATA |                            | NA                          |
| Ca-II-SNP1101 | 152.16                 | Ca- <i>desi</i> -LG(Chr)6 | 6938851                 | TTTGGATTTTTTTATGTACAATAGTATAGTTATTG<br>TAATCTCTAATTTTTATATATTGTTATTTTTATCAC<br>TAGAGCAGTCAATTAGTAATGTAATTTT     | C         | G       | GCAGAAAATTTGGATATTAATGCAAATTCATAT<br>CTATAATGCTAAGAAAATTCACATTTTCGATTT<br>AGAATATAATCATATTCTATTAATATTTATTT    |                            | NA                          |

| Marker IDs    | Genetic positions (cM) | Chromosomes               | Physical positions (bp) | Flanking sequences/Forward primers                                                                            | ICC 12968 | ICC4958 | Flanking sequences/Reverse primers                                                                                                                                                                                                                                                              | Annealing temperature (0C) | Amplified Product size (bp) |
|---------------|------------------------|---------------------------|-------------------------|---------------------------------------------------------------------------------------------------------------|-----------|---------|-------------------------------------------------------------------------------------------------------------------------------------------------------------------------------------------------------------------------------------------------------------------------------------------------|----------------------------|-----------------------------|
| Ca-II-SNP1102 | 153.00                 | Ca- <i>desi</i> -LG(Chr)6 | 6947535                 | TCCAAGTCGTGGTTCTCGCCGGTGGCGTCTCCAA<br>AAAACCTCCTTCCCCTCGTTTCAAAGGTACTCTCAT<br>TTTCAATCCCCTTTCTCTTTCTTATTTTTTC | C         | A       | AAAGCCTTCGGAAGCTCCTGCGAACCAAAAAG<br>AAGAAATGTTTGAATGTAATTGCAATTCCTTATTT<br>TTCCATTCCCATTTCATCACCAAGCAAACAG<br>A                                                                                                                                                                                 |                            | NA                          |
| Ca-II-SNP1103 | 153.84                 | Ca- <i>desi</i> -LG(Chr)6 | 6957538                 | ATTTCTTTAACTAACTCTTCAAATCTTTACTTTTC<br>ACGTTTGCTTCAAATAAAGGATTTAATTGTTCTC<br>TTTATTTTGGGATTGATTAATATCTGA      | A         | C       | GTAGTTATAATCAAGTGGTTAATAAGCTTCGGC<br>TAAGGTAATAATCGATTAGGAGTATTTCTTTCTTT<br>GTTTCCAGTTGATAACATAATATCACAAAAACG                                                                                                                                                                                   |                            | NA                          |
| Ca-II-SNP1104 | 154.75                 | Ca- <i>desi</i> -LG(Chr)6 | 6965550                 | TTCTTTGAACACCGAGGTTAAGGGTTGTGTGAAA<br>GAGAGGGATTTGGGAAGAAGGGTTGAGGCATTG<br>GTGTAGAGAAAAGAGGAGGTGATGGTGGAAAC   | C         | A       | ATTTGAGTGCTAGTTACTACTAAGAGATAAAAT<br>GGTCTACTACTTTTGAACCTAATACATGACAGA<br>AAATTATGACTTTGTATATGCAGTTGACCCCAT<br>CTAGTAGGAAAAGGCTTAGATAATAGGTATTGC<br>TGTAACCTAATTCACTAATGCCGTTGTTTCTT<br>GTTGATCCATGAACCAATTGCGAGTGAAAAAC<br>ATAAGCTATGACATGACAACAATCTAGCATTTT<br>CTTTAACTATTAGCCTATTAGCACCAAACT |                            | NA                          |
| Ca-II-SNP1105 | 155.53                 | Ca- <i>desi</i> -LG(Chr)6 | 6968625                 | ACGGGTCTTAGGTTAGAAATTATGATAGCTGCAG<br>CAGGAGTCCTAGCAGATACAACTGCCTGTTGC<br>TGAAACTCCAATAAGGCATTAGCTGACTTCA     | T         | G       | TCATAGTGCCACTGTTATGTGGACCGACAATGA<br>TGGAACAAGCAGCCCTGGTTTTGTGCTGAGA<br>GCCTGGTCACCAGAGGAGCAGTCGACTACTT<br>CGT                                                                                                                                                                                  |                            | NA                          |
| Ca-II-SNP1106 | 156.23                 | Ca- <i>desi</i> -LG(Chr)6 | 6975916                 | GTGAATGTGTGGCTTTTGTGTAATGAAATGCTTTG<br>ACCCTAAAAAGCATAAGGTGTAGCGTTTTATAAG<br>TTTGCACGCATGCATTTAGCATCGGCTCA    | T         | C       | ATAAATGAAACTAAGAAGATCTTTAGTATATTTA<br>CCTTGAAAAGTGATGATTTAGCCAAATTGATAG<br>AAATATCTATGATATGTGAATTTGAATACTCT                                                                                                                                                                                     |                            | NA                          |
| Ca-II-SNP1107 | 156.93                 | Ca- <i>desi</i> -LG(Chr)6 | 6982306                 | AACTTAAGATTTCTTAATGGGAAGAAGCCCTCTT<br>TTATTTTTAGGGTTCTTTATCAAGATTTTCATCTT<br>ATATGTATATTGTTATCTCAGCATTTCATT   | A         | G       | TGTTGGTTAACAAGGACTTGATTATATTATTAT<br>TATTATTATTAGTAGGGCTCTCTGAAAATTTTA<br>GTATTACAGTTAGAATTTAAGAAGCCAGCATA                                                                                                                                                                                      |                            | NA                          |
| Ca-II-SNP1108 | 157.63                 | Ca- <i>desi</i> -LG(Chr)6 | 6988975                 | TACCATCCTCTTCTCTCTGGTATTTTCTCTCTCTT<br>TTTTAAATTGTTCAAATTTCAATTTATTTAATTG<br>GTCATTTGTTATTTATTTTTGGATT        | G         | T       | TTAACATTAGCTCTAACGTTTATATAATAAGCAC<br>TTCACTAAGATGTTTATCCAACATGCCCTAA<br>TCTAGTGTTCAAAAACTTTAACCTAAAAATCCA                                                                                                                                                                                      |                            | NA                          |
| Ca-II-SNP1109 | 158.33                 | Ca- <i>desi</i> -LG(Chr)6 | 6995984                 | TTTTGTCTATGTCCAAATTGATAACATTTACTT<br>GAATTTCCAGCAATGGTCTTGTTCAGAGCTTGA<br>TAACATGGTTAAATTTGGCAGAAAAGTGCA      | A         | G       | GTTTCAAAACATATTATGTCGTATAAGAAAAAC<br>ATAGAATCACCGAAGCACATAAAAAGTAAAAG<br>ACTCACTTTACAACCTCCATAGGAACCTGAATG                                                                                                                                                                                      |                            | NA                          |

| Marker IDs    | Genetic positions (cM) | Chromosomes      | Physical positions (bp) | Flanking sequences/Forward primers                                                                         | ICC 12968 | ICC4958 | Flanking sequences/Reverse primers                                                                                                                                                                                                                                                                  | Annealing temperature (0C) | Amplified Product size (bp) |
|---------------|------------------------|------------------|-------------------------|------------------------------------------------------------------------------------------------------------|-----------|---------|-----------------------------------------------------------------------------------------------------------------------------------------------------------------------------------------------------------------------------------------------------------------------------------------------------|----------------------------|-----------------------------|
| Ca-II-SNP1110 | 159.03                 | Ca-desi-LG(Chr)6 | 7015537                 | TTCTTTGAACACCGAGGTTAAGGGTTGTGTTGAAA<br>GAGAGGGATTGGGAAGAAGGGTTGAGGCATTG<br>GTGTAGAGGAAAGAGGAGGTGATGGTGAAAC | T         | G       | CTACTCTCCCCAATAAATATCGATTCCCAT<br>CTCTCAAAATACAAAAGTCGAACAGTGTAGT<br>TGCTTCACAGAATAAACCAACATAACATGGCTT<br>C                                                                                                                                                                                         |                            | NA                          |
| Ca-II-SNP1111 | 159.73                 | Ca-desi-LG(Chr)6 | 7022331                 | GGTTGTGATGGTTCGTAGGTTAGGACAACGTAT<br>TAAATTTGTTTTATTTATTTAAAGTGAATGATTTTT<br>ATTTAAAGCGCAAGCCTTTTACAGCGCTT | C         | T       | GATAAAGAGAACAAAAACTAGCGGTGTTGGT<br>GTTACCATATCCATCACACTCACACCTATCTC<br>TTTAATTTCTCTCACTTTTTAGAAACTCTTTCA<br>TCATCATGGGTTCCAAAAGTGAACAACAAATC<br>CATCACTCTCTTTTCTACCTTGATTTTCCTCGT<br>CCTTATGTTTGGTCTTGCAAACCTCAGATGTGAA<br>CCAAGACAAAGCTGAATGCACGGACAACTCC<br>TACCTTCCGTAATTTCTACCTTTTCTAACTC       |                            | NA                          |
| Ca-II-SNP1112 | 160.43                 | Ca-desi-LG(Chr)6 | 7028534                 | CATCCGAATGAATCCTTCCAAGGGAGTGTGAAT<br>CTCAGGTAATATTTAAGTGTCTTTTGAAGTCTGG<br>TGCAACATATTCATTTATCTCTATGGATTG  | C         | T       | AATGCATACATGTCGTATTTGCAGTTAAAGTCT<br>TATCAGCAGCAGTGGTAACAACAATCAAACA<br>ATAAGGTTGTGACATGCAATTCATAGCTTCA<br>C                                                                                                                                                                                        |                            | NA                          |
| Ca-II-SNP1113 | 161.13                 | Ca-desi-LG(Chr)6 | 7040121                 | TTCCACGTGGTTCAGTGTGAATGCAACATTCGT<br>CTTGCCATGTCTCCTATTTTAAAGTGAACCATTTT<br>TAATGTATAACGGTGCATAAAACGGAACAT | A         | G       | TGACTACTTCTTCATCCCTAGAGAAATCTTATG<br>CAATTCATATGCACAAACAATATGGAATTTAAT<br>CAAAATACTCTTATTATATCACATTATATCA                                                                                                                                                                                           |                            | NA                          |
| Ca-II-SNP1114 | 161.83                 | Ca-desi-LG(Chr)6 | 7082685                 | GGTTGTGATGGTTCGTAGGTTAGGACAACGTAT<br>TAAATTTGTTTTATTTATTTAAAGTGAATGATTTTT<br>ATTTAAAGCGCAAGCCTTTTACAGCGCTT | G         | A       | CCACCTTATGTTACATGGCTTTTAAAGCGCTTT<br>TTGTGAAAGCGCTGTAATAATTCATGCGCTTCA<br>TATAATTAATGACCTATTAGAGCGTTTTTTATA                                                                                                                                                                                         |                            | NA                          |
| Ca-II-SNP1115 | 162.53                 | Ca-desi-LG(Chr)6 | 7097471                 | TCCTTTCTTTTATTCAGTTTATGTTTTTTCTTCAA<br>TATCATATTTCTTCGCAATTAACAATGTAATGTA<br>ACCAATTAATCACTTCTTATAAGGTCT   | T         | C       | GCTGCAACCAAGAAGCCATCAAACATAAATGG<br>AGAGTAATGGATGATAAATACCCACAAAACCA<br>ATAAGGGTAACAACCTGAATGAAAGATGAACAAA<br>ACAATTTGTGACTAAGACAATTATGAGAAATCT<br>GAATGAAAGATGAGGGTAATCTATGTACCACAT<br>ATACCGACACAAATACCAGAGACTATATTGACA<br>CTGACATGTCGGCACCAGGTAGTAATTTGAGAAA<br>ATGTAATCTTCAATCTCCACATCTATTTCATC |                            | NA                          |
| Ca-II-SNP1116 | 163.23                 | Ca-desi-LG(Chr)6 | 7219012                 | AAAAGTATCATCTTTATTATAGTTATAGCTTATATA<br>TTGTGATCCTATCGTGAAGCAAACAACTCGTGAA<br>GCTGTTGGGTTGATTGCAAGTCCCACAT | C         | T       | TTACATGGAAGGTTGGTACCCGGAGGCTGAT<br>ATATCTGCTTTCAGAGAATGCATGCTCTTTTCA<br>TGAAAAATCCTTATGTTCTTCGTCTTCTTTTT<br>CTGCTGGTATTGGTGGCCTTCTCTTTGGCTAC<br>GACACTGGGGTCATATCTGGG                                                                                                                               |                            | NA                          |
| Ca-II-SNP1117 | 163.93                 | Ca-desi-LG(Chr)6 | 7231361                 | CAAGAGCCATACTACAATGGCTTCCTGATTATC<br>AACCCTTCTCTTTTCAATTTACATTTTTCTGGTT<br>CATTTAACAACCAAGTTTTAAGATTTTCA   | A         | G       | TAATGACTTAACTACTATGACCAATTACTTGTT<br>ATTTTTGTTTTAAATTTTGAATATAAAAATTT<br>TCTACTTATAATTAGTGAGTGATAGAGAAAA                                                                                                                                                                                            |                            | NA                          |

| Marker IDs    | Genetic positions (cM) | Chromosomes               | Physical positions (bp) | Flanking sequences/Forward primers                                                                           | ICC 12968 | ICC4958 | Flanking sequences/Reverse primers                                                                              | Annealing temperature (0C)   | Amplified Product size (bp) |
|---------------|------------------------|---------------------------|-------------------------|--------------------------------------------------------------------------------------------------------------|-----------|---------|-----------------------------------------------------------------------------------------------------------------|------------------------------|-----------------------------|
| Ca-II-SNP1118 | 164.63                 | Ca- <i>desi</i> -LG(Chr)6 | 7288581                 | GGCCTAAGCCTGGTCTACGGCCTATCATAGGTTT<br>TTTTCCGGCCTGACTTGACCTTTTTATAAGTCTA<br>GCTTGACCTGACCTTTTTAAAGTCTAGCCT   | A         | G       | ATAGATATGTACATTGATATTGGTATGTGGAGA<br>GCATATGGTATGAGTAGAGCATTAAATGTTTT<br>AATATGAATAAGGGTTTTAAACAGGCTCCAGG<br>T  |                              | NA                          |
| Ca-II-SNP1119 | 165.33                 | Ca- <i>desi</i> -LG(Chr)6 | 7337556                 | ACATTGTTGAGACGGCACTTGAATTTGCTGATGA<br>TCTACAACCTGTTGCTGCTGTTGATTTTTGTTG<br>TTGTTGTTGCTGCTGCTGCTGCTGCTGCTGCTG | C         | T       | CTCAATCTCAGCCTCAAACCTCAATCACATTTCC<br>AGCAGCTTCTTCAGCATCAGCACTCATTCACTA<br>ATCAAAAATCATCATCTACAGCAGCAGCAAC<br>A |                              | NA                          |
| Ca-II-SNP1120 | 166.03                 | Ca- <i>desi</i> -LG(Chr)6 | 7366952                 | TAATGTGTTTGTATTTGCCATTTAATTTGATAAG<br>GTATGATTTTTGTATGTTTTCTTTTTAAAGTGATAT<br>GTTATGATAACAAGTATTGAATAGATAA   | A         | T       | TCAATACATCATTAACTAAACCATAACACTTTTT<br>ACATTGCATTGTATCAACATAGAATTAATGTTCA<br>CTCATGTTGCCTATGAACCACATCGTTCTAAC    |                              | NA                          |
| Ca-II-SNP1121 | 166.73                 | Ca- <i>desi</i> -LG(Chr)6 | 7435189                 | AAAAGTATCATCTTTATTATAGTTATAGCTTATATA<br>TTGTGTATCCTATCGTGAAGCAAACCTAATCGTGAA<br>GCTGTTGGGGTTGATTGCAAGTCCACAT | C         | T       | ATACAAGCTTAAAGTGCTATTGCTGACTGGTGC<br>ATTTGAAAACAAATGACCAAACCTCAATATATAG<br>CTTTGGCCTTCTCCTTATTCTCCCACTAGAG      |                              | NA                          |
| Ca-II-SSR334  | 167.43                 | Ca- <i>desi</i> -LG(Chr)6 | 7446833                 | TGCTTATAGCATAGCAAATGTGGA                                                                                     | (AAG)12   | (AAG)11 | AGTCTCACCATAATGTTTTACATGCATTCTGA<br>GTCTGAAATGTTGAGATGCATTTTCTTTTTATA<br>GTCAAATGAATTGTCTCAGAAGGGGGGATTTT       | TGAATTGTCT<br>CAGAAGGGG<br>G | 60.06                       |
| Ca-II-SNP1122 | 168.13                 | Ca- <i>desi</i> -LG(Chr)6 | 7470585                 | CGATGGAATACTATGTTTTGTGTATCATAAGAT<br>CGTATGCACCCATGTTGTGTTGTGCATATGAATG<br>TAAACAAAGTTTAGCTTATTTGTGATATA     | A         | T       | GACAACCTGCTTTTTTCATCAGTTTTCTGGAC<br>TCATTTTGGAAACAATAAACTTCAAACATAAAAC<br>TAGGTATCGAGGTAACAGGGAACCTATGCAA<br>A  |                              | NA                          |
| Ca-II-SNP1123 | 170.23                 | Ca- <i>desi</i> -LG(Chr)6 | 7628458                 | TCCCATTGCAAGCGTAAAGATTGACATGTTTCATC<br>GTGAGGTTGGTTCTATTGTTACTTATTATCTCTCT<br>GATTGTGTGGGCCACTGGGTAAGTAA     | A         | C       | CTGTGGAGCTTAGGAAGCGTTAGACTTTGACA<br>CACAACTTTTGAGTGAAGAGGCTGTTTAGGCG<br>GATACTGCTGCCACAATCAAGTACAAGGCATC<br>AAC |                              | NA                          |
| Ca-II-SNP1124 | 170.93                 | Ca- <i>desi</i> -LG(Chr)6 | 7634446                 | TCCTTCTTTTATTCAGTTTATGTTTTTTCTTTCAA<br>TATCATATTTCTTCGCAATTAACAATGTAATGTA<br>ACCAATTAATCACTTCTTATAAGGTCT     | C         | T       | ACGCTTCCAACCTCATATAGTTTCCACAGTTTG<br>TGAAACTAATGACACTTTTTGAATTACATAGCAT<br>GAGATAATTGAAGATCGAGCTTGGTAGCTGT      |                              | NA                          |

| Marker IDs    | Genetic positions (cM) | Chromosomes      | Physical positions (bp) | Flanking sequences/Forward primers                                                                            | ICC 12968 | ICC4958 | Flanking sequences/Reverse primers                                                                              | Annealing temperature (0C) | Amplified Product size (bp) |
|---------------|------------------------|------------------|-------------------------|---------------------------------------------------------------------------------------------------------------|-----------|---------|-----------------------------------------------------------------------------------------------------------------|----------------------------|-----------------------------|
| Ca-II-SNP1125 | 171.63                 | Ca-desi-LG(Chr)6 | 7653975                 | GAGCCTATTTCTTTTATTGGTAGATGAATAAATAT<br>GTGCTCCAATTTTTCTGGATTGATGCCATA<br>AATGGTTCACCATTCTTTGGTTTCATGTT        | T         | C       | CTGCAGATTCAACTGAAAGACTAGAGGCAACTA<br>AAGAATTTGTAAATTCTCGATTGATGAAGGAG<br>AGTTCAGTCAATTTGATTCATTGCAAGATAGCT<br>G |                            | NA                          |
| Ca-II-SNP1126 | 172.33                 | Ca-desi-LG(Chr)6 | 7686474                 | GATGATTTCTTTAGGGCTTCTTCATGTAGTTCTAC<br>ATATGGTAGACTTGTGGTGATACGTATGGTAAAT<br>TTGTCAAAGTTTTTACAATAAATTGGTT     | C         | A       | GTGTAGAGTCTAATTTAAAAATAATTGAAGTAA<br>GATAGAGTTGTTGTGCAAGCTTAATGCACAAC<br>TTAAAGTCCAAGTTCAACCCATCCGCATAACA<br>A  |                            | NA                          |
| Ca-II-SNP1127 | 173.03                 | Ca-desi-LG(Chr)6 | 7774516                 | TTAAGCACCACAACACCCCGAGAAAGCTTGGCTA<br>ATCTTTCCTGTAATTTTTCTGTGATAATCTGAAG<br>TGCTATTTGGATTGCCGACCTAATCTGTA     | G         | A       | AGATTTCAATTTACCATTGTTAGTGTATTTTGCT<br>TTCATATCAAGAAAGTTTGATTGTTCAATTGAT<br>GTTTTCTGACTTGTCTTGTATGAATTTTTAT      |                            | NA                          |
| Ca-II-SNP1128 | 173.73                 | Ca-desi-LG(Chr)6 | 7788148                 | TTATTGTTTTCTATTACGTTGAACATTTTTCAAAC<br>ATTGTGCCTATTTTGTGAAGGAGGAGAAGATATTT<br>TTTTCAAAAATTGTGATTTCTTTTAAATG   | G         | A       | AAGATATTTGGTGCCTCAGGGAACCTCTAAAAA<br>ATAAACCTCGTGATAGTTTTATTTTACTTGCAA<br>AAATATTAATAATTTATTCATTATAATCAAAT      |                            | NA                          |
| Ca-II-SNP1129 | 174.43                 | Ca-desi-LG(Chr)6 | 7794972                 | AGCAGCTGACTGGGTTAACCATCGATCTCCTGAG<br>GCACCTAGTTCTTTCTTCTTTGGTCTCTGGATAG<br>TATTCTTGCCGACTTGGGTAGCCAGCAAACA   | G         | T       | ATAAAAAGAAAAATAAATAAAACAAAAGAATTA<br>GACTAGTCTAAGTTACCTGAGATTTTGAAGTTA<br>CTTGTTCACAGCCTTTTTGGAAACCCTTGGACA     |                            | NA                          |
| Ca-II-SNP1130 | 176.53                 | Ca-desi-LG(Chr)6 | 7829769                 | CTTAAGCCTTTTCACTGTGTGTGTATGTATATA<br>TATACAGACCATCTTTTCTTAATTAATTAATGATT<br>ATATTTTTGTAAACTCACCTTCTCTCCA      | A         | C       | CATTCAAAAAGACCTATATCCCATTTCAAATGA<br>TAACTATTAAGCTACATATCATGAAAATAACGTC<br>CTTTAATTAGACTCTACGTCTACTTTTTTCATT    |                            | NA                          |
| Ca-II-SNP1131 | 177.21                 | Ca-desi-LG(Chr)6 | 7833350                 | TGAAACTTCTTTGTTTCTGTATTTTCGGAATATGA<br>GTGTGTGACTTTTTATAAATTGTTTCTATTGATAATA<br>CTTATCTAAAAATGTATCCATCATCTTAT | T         | C       | ATGAATCATAGTTCTAATATTTTAGAGTCTATTT<br>ATTTTCTATATTTTCGTGCTTCAGATATTAGAATA<br>AATATCTGACGAGATAAAGTCATCTCTATCAA   |                            | NA                          |
| Ca-II-SNP1132 | 177.89                 | Ca-desi-LG(Chr)6 | 7853727                 | GACTCTATGAAGTATTTAAACTTTTTCTTTTGT<br>TTGCTGGTGGATTCAACATAGAAAACCAACATGTG<br>TCGTTTACCTTTGCTTGAGTTTGTTCGTG     | T         | C       | CAATAAGTCATGACACATCTACAATCCAAC<br>AACATTATCTTTCTTTTCAAACCTATATAAGCA<br>AATGCTACTAAATATGTCTCTCAATAGACGTG         |                            | NA                          |

| Marker IDs    | Genetic positions (cM) | Chromosomes      | Physical positions (bp) | Flanking sequences/Forward primers                                                                            | ICC 12968 | ICC4958 | Flanking sequences/Reverse primers                                                                             | Annealing temperature (0C) | Amplified Product size (bp) |
|---------------|------------------------|------------------|-------------------------|---------------------------------------------------------------------------------------------------------------|-----------|---------|----------------------------------------------------------------------------------------------------------------|----------------------------|-----------------------------|
| Ca-II-SNP1133 | 178.57                 | Ca-desi-LG(Chr)6 | 7863456                 | CTAGAGCTTGCAATCAGTTTGACTGGCGTTATTTA<br>GTGAATTTTCGTGCATGACTAGTTTCAGTAAGTC<br>TAATTTTAAGCGAGGAAACTCAAGAGTTGT   | G         | C       | TTCCCACTATGTTATAATTACATCTCCTATAAAA<br>GCTTTTATTAATCAACTAATATATTGACCTTTAT<br>TTATTGTGGTTGAATATTGGTCCAACAAGTTT   |                            | NA                          |
| Ca-II-SNP1134 | 179.25                 | Ca-desi-LG(Chr)6 | 7876356                 | AATACAAATATGAATGTGATATCTTTCATATTTGTC<br>CGTGAATTTATGCTTCCCTTTTTTTTTATTGTTGT<br>TGCGTTCACAAAATTATACCTCTAGAGC   | T         | G       | ACGAAAAAACTAAATTAGTATAAAAACTACTT<br>ATTTAAATAAAAAAGAAAAAGATTTGATAAGTG<br>TTTCTAAATAAAAAAATAGTATGGAGAGAC        |                            | NA                          |
| Ca-II-SNP1135 | 179.93                 | Ca-desi-LG(Chr)6 | 7880374                 | AACCCACCTACCTCTTTAATCAAATAGAATGATG<br>CTTAACACACAACTACTCTTCTTTGTTACTCGG<br>CCTGTACTTCATTTGCTAAAGTAATTGATC     | G         | A       | TTATAAATATAGTAGTTAATCATGTTCACTTTAT<br>GTGTTTGTGCTTGAGTGTTCATGGAATAA<br>ACACTAGAAAATTTGTTTAGGACTGATAATATG       |                            | NA                          |
| Ca-II-SNP1136 | 180.61                 | Ca-desi-LG(Chr)6 | 7895882                 | AGCCGAAAGCATTTTACATCCACTACCTCCCTAAC<br>ACACTTATTCTAAATCTATAAATACTTTATCTATTC<br>TTAATTGGACTCCGGACCCAGTTTACTGC  | A         | G       | AAAAAAGTTCGGTTTAGTTCAGTTTAAAAACA<br>GTTTCGATTGAGTCTACAATTTAGATCAATTTTT<br>AATTTTTTAAACCCCTATCCTAACTATGCAT      |                            | NA                          |
| Ca-II-SNP1137 | 181.29                 | Ca-desi-LG(Chr)6 | 7917856                 | TACATTTTTTTTTAGTTAGTGTGAACGGATGAAAA<br>ATAAAAAACCAGCCGTGCTTGAATAATAGCTTCT<br>ACGCGTGCTGTGTTGTGCTGCGCTGAAAA    | T         | A       | CACAAAGACAACATAAAGTTACTGTTTTTGT<br>TTTTTTTTTTTTTAAAGATAAGGACAGTAGTTT<br>CTAATCAGAAAATAAAGTTGATTTGGTTGG         |                            | NA                          |
| Ca-II-SNP1138 | 181.97                 | Ca-desi-LG(Chr)6 | 7936608                 | ACTAAGAACGATTTTCGATATAGTTATTTATCGATG<br>ATTCTTGTTGATGCAATGAAACATTTTTCTCGAAC<br>AACC GGGAATAATATTGCTTATGTGTTG  | G         | T       | AATCTTGCTGATTAATATGATTTTTCTCTCTTG<br>ATCCACTGATTTATAACATGATTCACCTACCAAT<br>TAGATTGCTATTGGATTGTGATAAAAAATTC     |                            | NA                          |
| Ca-II-SNP1139 | 182.65                 | Ca-desi-LG(Chr)6 | 7943468                 | TTTTCGCCTTGTGCAGATTTTATGTGGATAATATT<br>CCTATTCGTGAAGTTACGCGAACAGAAATCTATGG<br>GAGGAGACTTCCCCGCCAAGCCTATGACTCT | G         | C       | CAAGGTCGGAGAACTTAGCAATATATGGTGCAT<br>ATTTGTAATTTACTCTGATTTTTCCACCATTTGGT<br>AGCCCAATCGGATGCATCCCATTATTGTAGCATA |                            | NA                          |
| Ca-II-SNP1140 | 183.33                 | Ca-desi-LG(Chr)6 | 7958054                 | AACCTTGTTACCCTTGTTAACAAACCCTAATTCCT<br>GTGCGTGCAATTTCCGTTCTTCATTCTCACGCC<br>GCAGTCGCTGCACACACACACCCGGAGCCAA   | A         | G       | TTGGTGTGGAATCGAGTGCATACGAGAGTA<br>ATACCTCTCGATAACTTGACGAGAGGATTTCTT<br>CACTGCTTTGTGCGTACTCGTCCCATGGTTAC<br>GG  |                            | NA                          |



| Marker IDs    | Genetic positions (cM) | Chromosomes               | Physical positions (bp) | Flanking sequences/Forward primers                                                                           | ICC 12968 | ICC4958 | Flanking sequences/Reverse primers                                                                                                                                                                                                             | Annealing temperature (0C)    | Amplified Product size (bp) |
|---------------|------------------------|---------------------------|-------------------------|--------------------------------------------------------------------------------------------------------------|-----------|---------|------------------------------------------------------------------------------------------------------------------------------------------------------------------------------------------------------------------------------------------------|-------------------------------|-----------------------------|
| Ca-II-SNP1141 | 184.01                 | Ca- <i>desi</i> -LG(Chr)6 | 8006246                 | GAGATTCAAATTGTAGAATAGCAAATGTTTCCTA<br>TAGTCACTAGTCATTGTCTTTCTAGACTCTGTGTG<br>AACCATTGGGAAGAAGTGGTATTTTGTCTCT | A         | G       | CTGCTTAAGCACAGGTCTCCCTTTAAAGTCAAC<br>CGAGCCATCTCCTGTGTATCGCTTACTCTCTTC<br>ATCCTTCAGATAAAAAATAACCAATAGTTCATCA                                                                                                                                   |                               | NA                          |
| Ca-II-SSR335  | 184.69                 | Ca- <i>desi</i> -LG(Chr)6 | 8126601                 | CAAACAAAGTCATGATGCAAAA                                                                                       | (AT)12    | (AT)14  | ACAAAAATAAATTGATGAGAAGAAATAAAATAAG<br>GCATATCTATTTGTTTTGTTGGTTTTACACAC<br>AAAAAACACACACGAAAAAAAAAAAAATAATATA                                                                                                                                   | TGTTTTGTTG<br>GGTTTCACAC<br>A | 58.72                       |
| Ca-II-SNP1142 | 186.73                 | Ca- <i>desi</i> -LG(Chr)6 | 8407081                 | TGACTGAATTGGCCCTGCGTTTGCGAAATCGTAG<br>TTGTTACAAGTTAATGAGTCTTGAAGTTAAGTTT<br>GGGAGGAACCTCACTCTGAAAGGTGATATCG  | A         | G       | TATTTGATTTAATTTAAAACTTACTAGTACTT<br>GTAAGGTTTTTCATACCAAAGTCAATTTCAAATTA<br>AATAAGTAAAAACAAATTACAATCCTTATTC                                                                                                                                     |                               | NA                          |
| Ca-II-SNP1143 | 187.41                 | Ca- <i>desi</i> -LG(Chr)6 | 8455952                 | GTGCCTCACATTGAGCATTATGGTTGTATGATTGA<br>CCTTCTAGGAAGGGTTGGACTTGGATGAGGCT<br>GAAAATTTGATCTTCTGTGTTGTCGCTCTGT   | C         | T       | GAACTAAACAAAATAAATCATATCAAACCAAAC<br>TAAACAAAGAGAGAAGCAACAAAGCAAATCACT<br>AGAGAGATTAGCAATCAACAGAAGAAGCCACA                                                                                                                                     |                               | NA                          |
| Ca-II-SNP1144 | 188.09                 | Ca- <i>desi</i> -LG(Chr)6 | 8709503                 | TTAGTCCAAAGTAGGTTGAAGACTTCGATGAGAGT<br>TATGCACCTCGGCCGCTACCACCTTCTTGTGAAT<br>TTTGTGTTTAGCTGAAGTGATTACGACTT   | A         | G       | AAAAAATGCCTGGCCTTACTATTGGAGACACTA<br>TTCCTGATCTTCAAGTTGATACAACCTCAAGGCA<br>AGATCAAACCTCATCAATTTCTGTTCTGATACAT<br>GGACCATTCTTCTCTCATCCAGGTGATTTCA<br>CCCCAGTTTGTACCACGGAACCTGGTAAATGG<br>CTCAG                                                  |                               | NA                          |
| Ca-II-SNP1145 | 188.77                 | Ca- <i>desi</i> -LG(Chr)6 | 9229603                 | GCTCAACAGAAATGGGAAGTTGAAACACTCACAG<br>CCTTCTGAACAGCCTCATTAGTCACTCTTGGAGAG<br>GACTTTCTTGAAGCCTGAGCTGCAGCATTAG | T         | C       | AGTTAAATCCTCTTTTTGACAATATTATGTCATG<br>TGTTACAGATAGTTCAAATTACAATATCTTGCAG<br>GCCATATCAGAGGAGTGATGCAAAATCCATCT<br>GATGTTGGAATCCAATATCAGTCTCCATGGAAA<br>GTGTCAACACGGAATAAGGGAAGAAGAAGTA<br>TTTACCTGACAAACCAACATCAATTGACTGTAT<br>GCAATGACTCCAACACT |                               | NA                          |
| Ca-II-SNP1146 | 189.45                 | Ca- <i>desi</i> -LG(Chr)6 | 9392890                 | TGGGGAGTTAATTGGTGTATTCCTTCACTTCCATG<br>TATTTATAATTCACACAGTGTTGTCAATAGCAATT<br>ATAGTGCCGCTATAGTGTATAGCGTAGC   | T         | C       | TGTAGCCATGGCGGATTACTGGTGTATTATTG<br>AAATGAAAGTCCAACATAAGAAAAATAACTAAG<br>AATACAATCACAACATAGTTCACGTGCTGTATT<br>ATTAGTAGGTCGTATAAGCACAAGTTTTACCGT<br>TACTGGATTTTATGCAACAACT                                                                      |                               | NA                          |
| Ca-II-SSR336  | 190.13                 | Ca- <i>desi</i> -LG(Chr)6 | 9802459                 | TTTGTTTTCATTCAAGTGACACG                                                                                      | (AAC)12   | (AAC)11 | TTTCCTTCACTTAACCTCTATTTTGTCTTTCT<br>TTATGCTACTGCCACACCGTTTTCCAACTCAT<br>ACTGTATACAAATTAAGGAATTTTATTTTAG                                                                                                                                        | TATGCTACTG<br>CCACACCGTT      | 58.73                       |

| Marker IDs    | Genetic positions (cM) | Chromosomes      | Physical positions (bp) | Flanking sequences/Forward primers                                                                           | ICC 12968 | ICC4958 | Flanking sequences/Reverse primers                                                                                                                                                                                                                                                                                                                                                                                                                                                                                                                                                                                                                                                                                     | Annealing temperature (0C) | Amplified Product size (bp) |
|---------------|------------------------|------------------|-------------------------|--------------------------------------------------------------------------------------------------------------|-----------|---------|------------------------------------------------------------------------------------------------------------------------------------------------------------------------------------------------------------------------------------------------------------------------------------------------------------------------------------------------------------------------------------------------------------------------------------------------------------------------------------------------------------------------------------------------------------------------------------------------------------------------------------------------------------------------------------------------------------------------|----------------------------|-----------------------------|
| Ca-II-SNP1147 | 192.17                 | Ca-desi-LG(Chr)6 | 9923291                 | GCATTTTTTCTACCTCAAAGGAGTTATTCCTCTTCATAACCATCCAGGAATGACTGTTTTCAAGTAA<br>GCTTCTATTGGGACAAATGCACATTAAGTC        | T         | C       | AGTTTTCTGTTTCTGAATTTTCAGGTACATTGG<br>CAGACTCATAAGTAGATTCTCAATTTGTGAGAT<br>GAGCAGTATTCTTGTATTTGGCTATAGGAAT<br>AAGCATAGGCTTTGTGGTGGAGTTGGTTTAA<br>CATTTTTCAATTTAGTCATATTCAAGGTGGAA<br>GGAAGAGAATAGACGTGGAGAAGAATGGTCCT<br>CGGAGAACCAAGTCCGTTCTGTTTCATGTCAA<br>CCGCTTCATTCTACTCCAGCATTATCAGACTCC<br>GACCGATCCTGCAATTCCTTATTAAAGATCTCTT<br>GTATCATTAAAGGCTCTCAACAATGATTGCTTTC<br>TCCATTTCAAGTCGTCTATATGCCCTCGTTAGCT<br>GATTTGAGGTCTGATTGAAGACTACTATTGCAC<br>TGTTGTAGGTTCAAATTATCATCAATTGCTACC<br>AACTTTTCTGACTTTTCCTTTGCAATTTATCTCTT<br>CTAAGAAAGAAATGTCT                                                                                                                                                                  |                            | NA                          |
| Ca-II-SNP1148 | 192.85                 | Ca-desi-LG(Chr)6 | 9955114                 | TCTATATATTCTACATGAATCTATTATAACAACCAA<br>CATTTGGTCAGGGCAGGCTTTGATTTTTGTGCAA<br>TTACACTTCATATGGAATATTCTTCATTG  | A         | G       | AGTTTTCTGTTTCTGAATTTTCAGGTACATTGG<br>CAGACTCATAAGTAGATTCTCAATTTGTGAGAT<br>GAGCAGTATTCTTGTATTTGGCTATAGGAAT<br>AAGCATAGGCTTTGTGGTGGAGTTGGTTTAA<br>CATTTTTCAATTTAGTCATATTCAAGGTGGAA<br>GGAAGAGAATAGACGTGGAGAAGAATGGTCCT<br>CGGAGAACCAAGTCCGTTCTGTTTCATGTCAA<br>CCGCTTCATTCTACTCCAGCATTATCAGACTCC<br>GACCGATCCTGCAATTCCTTATTAAAGATCTCTT<br>GTATCATTAAAGGCTCTCAACAATGATTGCTTTC<br>TCCATTTCAAGTCGTCTATATGCCCTCGTTAGCT<br>GATTTGAGGTCTGATTGAAGACTACTATTGCAC<br>TGTTGTAGGTTCAAATTATCATCAATTGCTACC<br>AACTTTTCTGACTTTTCCTTTGCAATTTATCTCTT<br>CTAAGAAAGAAATGTCT                                                                                                                                                                  |                            | NA                          |
| Ca-II-SNP1149 | 193.53                 | Ca-desi-LG(Chr)6 | 10232264                | GCCTCTAACACTATTCGTGGTCCCATGGATTG<br>CCCTTTCGCTTTCCTTATAGATAGAGTTATAGATG<br>ATACAAAAAATGACTTCAACCTAGTATTTAC   | C         | A       | CCACATTTCTAACCTCATCTTGCAATTTTTGCAT<br>CACAATTTGGGTGCTTTAGTAGTTCAGCCATTGC<br>CCATTCTAGGACTGTGTAGGTAGTGTGAGTACC<br>TGCAGCAAACATGTCCAGTATCAAAGCCTTTAT<br>AGCAGTTCTATCAATTGGGAATCCAACAGCATT<br>AGTCTTTTGAACAGAAAGCAAACATCCACAAA<br>ATCACTATGCTCCTCATCACTATCTTACCACCT<br>CCTTAACCTAGCAACTATATCATCTCTCAATCACT<br>AATTACAATGGCAAGTAGACAACATAGATGTAA<br>CCAATGTGGAATACTACTAATGGTTCCACAAGA<br>AAGCCAAGCCTTTAAGTGTCAATATGCAATGG<br>CATAACCTATTTTTCAATCCACAGGTCCATTGAA<br>TCAGGCCTACA                                                                                                                                                                                                                                             |                            | NA                          |
| Ca-II-SNP1150 | 194.21                 | Ca-desi-LG(Chr)6 | 10782792                | CGATTTGTCTTCTTCTTCTCAAAGAGAAGAGCTTA<br>TTCGAAAAGTTGCTTCTGCTTTCAACGGCAAGCTC<br>AACATACTTGTTAGTCATTTCTTTTCTATA | T         | C       | AGTTTTCTGTTTCTGAATTTTCAGGTACATTGG<br>CAGACTCATAAGTAGATTCTCAATTTGTGAGAT<br>GAGCAGTATTCTTGTATTTGGCTATAGGAAT<br>AAGCATAGGCTTTGTGGTGGAGTTGGTTTAA<br>CATTTTTCAATTTAGTCATATTCAAGGTGGAA<br>GGAAGAGAATAGACGTGGAGAAGAATGGTCCT<br>CGGAGAACCAAGTCCGTTCTGTTTCATGTCAA<br>CCGCTTCATTCTACTCCAGCATTATCAGACTCC<br>GACCGATCCTGCAATTCCTTATTAAAGATCTCTT<br>GTATCATTAAAGGCTCTCAACAATGATTGCTTTC<br>TCCATTTCAAGTCGTCTATATGCCCTCGTTAGCT<br>GATTTGAGGTCTGATTGAAGACTACTATTGCAC<br>TGTTGTAGGTTCAAATTATCATCAATTGCTACC<br>AACTTTTCTGACTTTTCCTTTGCAATTTATCTCTT<br>CTAAGAAAGAAATGTCT                                                                                                                                                                  |                            | NA                          |
| Ca-II-SNP1151 | 194.89                 | Ca-desi-LG(Chr)6 | 11431448                | GCCTTCGTATTGGTTACCAATGTGTAGATCGACAT<br>GAATAAAGAATGTTTCATCTTCAGATTGGTGCAT<br>GATCGGCAAGAATGAAAGGATGATCGTCTT  | T         | C       | GCTGAATCTGTGAATAGCAATGAAATTTATTAT<br>CTGCAAAGCTTAGCAATCTCAGTTTTGAGTCTT<br>AATACACAAAAAATCTCGTCATCGAAGATTCAA<br>GCCTGACAATGCAACCAAGTACCAGCGATAT<br>GTATAAATGTTAGACATGGCTAATTGGTCACA<br>CAAAGCTGTACAGGTACATAACTAGCATGGTT<br>TTTTTGTACATCTTTGAAATTATGGGGGCTTT<br>ACTCCAGATTTTCTATCCCAATCTCCCTCCCT<br>TTTTAATCCTCTCCCAATCCCACTCCCACT<br>TTGCTTTTTCTCCTCTTTCTTTTTTTCCCCCTC<br>TAACTTCTTCTCCTGCATTCTTTCTTCTATCTAA<br>ACCCTAGATTTCAAATCTGGGGTTTTCTTTTCT<br>CTTCAGATATGATTATACCAACTTTACACCTTCTG<br>ATTTTCTACATTTTGCCTATATATTTCCCAT<br>TTTTCTGTCTGCACTGTTTTAGTTCTAAAAAA<br>ACTCTTTTCTCCTCTTTTCTCTGTTAGCACTT<br>TCAAACCTAGCCTACTACAACCATGTCGTGATG<br>AAGTTGAAGTTGTTCTCAGCTAGGTTTGCAGAGA<br>CCGACTTTAATTCGTGAAGAATCTCAAGTTGA<br>T |                            | NA                          |
| Ca-II-SNP1152 | 195.57                 | Ca-desi-LG(Chr)6 | 11443399                | ATCCTGATTTTGAAGAAATGTGTGATGATGTTGAA<br>CTTAATTTGACGCTATGAATGACGAAGTTGAACC<br>TGTTATGATTGATTTGACTGATGTTTTAC   | A         | G       | TTTTAATCCTCTCCCAATCCCACTCCCACT<br>TTGCTTTTTCTCCTCTTTCTTTTTTTCCCCCTC<br>TAACTTCTTCTCCTGCATTCTTTCTTCTATCTAA<br>ACCCTAGATTTCAAATCTGGGGTTTTCTTTTCT<br>CTTCAGATATGATTATACCAACTTTACACCTTCTG<br>ATTTTCTACATTTTGCCTATATATTTCCCAT<br>TTTTCTGTCTGCACTGTTTTAGTTCTAAAAAA<br>ACTCTTTTCTCCTCTTTTCTCTGTTAGCACTT<br>TCAAACCTAGCCTACTACAACCATGTCGTGATG<br>AAGTTGAAGTTGTTCTCAGCTAGGTTTGCAGAGA<br>CCGACTTTAATTCGTGAAGAATCTCAAGTTGA<br>T                                                                                                                                                                                                                                                                                                   |                            | NA                          |
| Ca-II-SNP1153 | 0.00                   | Ca-desi-LG(Chr)7 | 7906                    | CGTTAACTTCTCGCTCTGTCTAAAACCTCTCATGC<br>TTCATGGCGGCAAGCTCTTCTCAATCATATGTC<br>TCATATGTTCCAATGTTTCAATGCAACCTA   | G         | A       | TCAAACCTAGCCTACTACAACCATGTCGTGATG<br>AAGTTGAAGTTGTTCTCAGCTAGGTTTGCAGAGA<br>CCGACTTTAATTCGTGAAGAATCTCAAGTTGA<br>T                                                                                                                                                                                                                                                                                                                                                                                                                                                                                                                                                                                                       | NA                         | NA                          |
| Ca-II-SNP1154 | 2.10                   | Ca-desi-LG(Chr)7 | 26916                   | CTAAGCATTACATTTGACCCAGTGGTGACTGCAGA<br>AAACCCCTAGATACAGGAAGTGGATTTGTGGTTG<br>CAACTTTAGAGTTTGTGACTCAATTCGCTTC | A         | C       | CAGCACGTGGCAGAGGCATGCACACTAGGGCC<br>TCAGCTTGGCTAGATTTACACATATGCACATAT<br>TCCAGGAAGACTTCTTTGTTGCTTTATGCAAAT<br>AT                                                                                                                                                                                                                                                                                                                                                                                                                                                                                                                                                                                                       | NA                         | NA                          |

| Marker IDs    | Genetic positions (cM) | Chromosomes      | Physical positions (bp) | Flanking sequences/Forward primers                                                                            | ICC 12968 | ICC4958 | Flanking sequences/Reverse primers                                                                               | Annealing temperature (0C) | Amplified Product size (bp) |
|---------------|------------------------|------------------|-------------------------|---------------------------------------------------------------------------------------------------------------|-----------|---------|------------------------------------------------------------------------------------------------------------------|----------------------------|-----------------------------|
| Ca-II-SNP1155 | 3.04                   | Ca-desi-LG(Chr)7 | 32994                   | TAGACCTAATATTCTATTAGTGTGAGTGTGTGTC<br>AGATTTTAGTTTATGATCCTAAAGAAACCACTTGG<br>TTTATATATCTGAAAGGCACTACTAACCTT   | G         | T       | TAGTTTCCTCTGGTGCTTTTCCTTTCTACCTTGT<br>CTCTCGTATAGTCAGCATTGTAGAAACCAACTA<br>ACATGTACTCAGAGGATGGCTAAAAACACAAAC     | NA                         | NA                          |
| Ca-II-SNP1156 | 3.98                   | Ca-desi-LG(Chr)7 | 41554                   | CTGCCTAAGATGATAGGCGCCCTGTTGGACTTAT<br>TCTCTCCCTCCACGTCCAGAATGAAAAATCTGCA<br>GGAAATGTCAAATTCATTAACCTGAAGAAGTA  | C         | T       | TATTTTAACTCTCTTGTCTTGGACCTTTACAG<br>AGTATAGGTGTTACCATTCAATTGGCGAACAGG<br>AGCAATGCTCATCCTGTTGGACTTATGGAGGAT       | NA                         | NA                          |
| Ca-II-SNP1157 | 5.86                   | Ca-desi-LG(Chr)7 | 86750                   | AAGGACATAGATGTTATGTTGTTGGTGGTAACTCG<br>AAGATGATGGGTATGGATGGATTAACGTTATACGA<br>ATAGGCGATTTCATGTAAGGATCTAAGTGG  | C         | A       | AATTCAGGGTATTACACCTCTTTGACAGTTA<br>TCAAACCTCATCCAGTCTCATCCTGAAAACTAT<br>CAGGCGAACATCTAATATTCTTTAAAAAGCT<br>C     | NA                         | NA                          |
| Ca-II-SNP1158 | 6.80                   | Ca-desi-LG(Chr)7 | 102757                  | TTACAAGCAAAGATCTAATTTAATTAATCACTT<br>TACTTGGAGTTAGGTAGAAAACTTTTGTCTCGTC<br>TTGGTACAGTTCTAAGTTTGGAGTGGTGG      | T         | C       | GAAGATGTTATTCATCAAAGTACAAAACTGAT<br>TTTTTTTTCTTTTTCTTTTTATTTATTTTATT<br>TTTCTTGATAATTTTTATTTTATTTTGGAGA          | NA                         | NA                          |
| Ca-II-SNP1159 | 8.68                   | Ca-desi-LG(Chr)7 | 155116                  | ACTCCATCGAAAGTTTCGACTCTTCCCGAAATAC<br>GATTTGAGTCTTTGTCCATTGACCTTGAAGTTCCG<br>ATCGGAGTGATATATCTTCAATTTCGACGGC  | A         | C       | AACTAGTTCTCCTATTCAACTCAAGATTGAAGTT<br>GTTTCCCGGAAAACTAAAGTCAAGATGGTCGG<br>GCCCTTTGAAGGTAACCAAGGATTTCCACACG<br>G  | NA                         | NA                          |
| Ca-II-SNP1160 | 9.62                   | Ca-desi-LG(Chr)7 | 196707                  | GGACCTGCACCTGAATCAACAGCAGGACCTACAC<br>CTACACCTGCACCTGAACCTGCACCTGAACCTAACA<br>GCAAGGCCTGCACCTGAACCTGCACCTAATG | G         | A       | TACCTCATGCAGTATGATGGGTTGGATTCTTG<br>GACATTTCCAGATTCTAGAATGGCCTTTTCTCT<br>CCTTGATATGCCAGATTTTCCCAAATTTTCCA        | NA                         | NA                          |
| Ca-II-SNP1161 | 10.56                  | Ca-desi-LG(Chr)7 | 253246                  | TTTTCTTCTTTATCTTTCATCTTTTTCCCTTGATT<br>GATCTCTCTTTAGGAACCTGCAATTTCTTTTATGT<br>GACCCGTTTTGCCACAATGATAGCATAT    | C         | A       | CAAAGTCACGGGGGAGAAGTCAATCTAGAAAC<br>TTCCATAGACGCGACAACCTGAAAAGTTGTAGC<br>AAGTCAAGAAGCAAGTCGAGGACTAGAAAAGA<br>AGT | NA                         | NA                          |
| Ca-II-SNP1162 | 12.44                  | Ca-desi-LG(Chr)7 | 268136                  | TCTAAGTACACTTCTTCTTTTACCATGTCAAAC<br>AAGATTGACTTCAAATATTGAACTTTTTTTTCAT<br>TTACATGGCAATTTTACCTGTCAATGGA       | T         | G       | CTGTTACATACGTAACATTCACCAGTTAAATA<br>GAAATGTTATAAGTCTTCGTTCTCTATCAAGA<br>GTGAAAGAATGTTCAAGAGCTACATCAATGAAAC<br>A  | NA                         | NA                          |

| Marker IDs    | Genetic positions (cM) | Chromosomes      | Physical positions (bp) | Flanking sequences/Forward primers                                                                          | ICC 12968 | ICC4958 | Flanking sequences/Reverse primers                                                                              | Annealing temperature (0C) | Amplified Product size (bp) |
|---------------|------------------------|------------------|-------------------------|-------------------------------------------------------------------------------------------------------------|-----------|---------|-----------------------------------------------------------------------------------------------------------------|----------------------------|-----------------------------|
| Ca-II-SNP1163 | 13.38                  | Ca-desi-LG(Chr)7 | 272276                  | TTAAATACGTTACTCATATCCCACCAATAAATGTGT<br>CGCTGCCTTCTGCTTTTTCCACTCAAATCTCAGT<br>ACACTTCCTCTTTTTCCACCATGTCAAA  | T         | C       | AGTGAATAATGTTCAAGAGCTACATCAATGAAA<br>CACCCATTGACAGGTAAAATTGTCATGTAAATG<br>AAAAAAAAAGTTTCAATATTTCAAAGTCAATCTC    | NA                         | NA                          |
| Ca-II-SNP1164 | 14.32                  | Ca-desi-LG(Chr)7 | 276790                  | GGATTTAAGCCAGGTTAAAAAAGTAAAAGATGTC<br>GTGTATTTAGCGTTTTATCTTCTGCTCTCATAAC<br>ATCTGCGCTCTAAACCTCTTCTTTCCATTTC | C         | G       | AATCAAACATGTCTTAATGAATTGATGAAGTGA<br>TGATGATAAACCGGCAACGGTTGTAAGTCGAA<br>TCCAAGTTGTAGGTGCTTACGATACAGAGGTT<br>A  | NA                         | NA                          |
| Ca-II-SNP1165 | 15.26                  | Ca-desi-LG(Chr)7 | 333608                  | CTCTTTTTCACTTTTTTTTTAAAGTCATTATTCAG<br>ATTTATATTGTTTATTAGAAATTACCAAACCTTCTG<br>TTCAAATCAATTAACCAAGTTTTTCAAG | G         | A       | ATTGTGAACAATTTGGATAATGAATTTGAACTAA<br>AAACTTGGTCATTCTAATTAACAAAATAAAT<br>TTGGTTAATGACTTAAACAATATGGTTAATT        | NA                         | NA                          |
| Ca-II-SNP1166 | 16.20                  | Ca-desi-LG(Chr)7 | 366332                  | ATCGAAACCCGGGTACACCCATTTAGTAGAAACT<br>GCCCTAAGCCGGTAGGTCTCGTTCAAAGCCAC<br>TTTAGTTGATGTGTCCAAACCATGTGCTCG    | A         | G       | TTAGTGTGTTGGGTGTGTGTACACTTTTCTT<br>CTCATGTCCCTATGTAACCAACAAAATTTCA<br>GCAACTTGCGCATCAACGATGACAACATCATT          | NA                         | NA                          |
| Ca-II-SNP1167 | 17.14                  | Ca-desi-LG(Chr)7 | 370425                  | TTGCACCTTGGTAATTAGTGCTGATCTGTGAGTGA<br>TTGCACTCTAGAATGTGCTGATATGTGAGCGATTG<br>CACTCTAGAAAATCGTGTGGTCTGTGAGC | G         | A       | ACTGACCAATATTAATTACCAAGTGCAATCTC<br>TCATATATCAACACGATTTACTAGCGTGCAGTC<br>GCTCACAGACCAGCACGACATACACGAGTGCA<br>GT | NA                         | NA                          |
| Ca-II-SNP1168 | 19.96                  | Ca-desi-LG(Chr)7 | 425722                  | AATGGTGTCCGGAATGCCAATTACCATGCAAGCA<br>TGCATCCTGAACGCGAAACCTTACATCGTTGGAA<br>CCGCTTTCGCCGCCGGAATTTGGTGTCTTCT | C         | A       | CACATAAACTCTGATCAAGTCCAATAGCATCA<br>ACATCATAAATGAAGCTAGTAGATATTGAATTG<br>AATCTACATAGACCAGACCTGTATCGTAGCCGA<br>A | NA                         | NA                          |
| Ca-II-SNP1169 | 20.90                  | Ca-desi-LG(Chr)7 | 465928                  | TATAATTATCGAAATGTTCAACAACGTTGCTCTTTT<br>TGTATAATTTAATTATTTATGGTTTATTGTACCCAC<br>AAATCATAATTTACTGTGTCTTTTTCC | A         | G       | ATACACTTAACCACATTGACATAAACATCTTCT<br>CAACTTCACTTATCAGATGTTACTTAAACTTAC<br>GTTGAATTTAAATGTTATAAGTTGATTTATT       | NA                         | NA                          |
| Ca-II-SNP1170 | 21.84                  | Ca-desi-LG(Chr)7 | 468231                  | CGAGATTGACATTGATCAGGTATGTTGGACACCAT<br>ATGAGGAGCATCGGGTGAAGTGACCGTTTGAATA<br>ATATTTTTTATTTGAGGGTGGATACGTTGG | G         | A       | GTCGTCTGACCCATTATCTCTAACGGTGAGCTA<br>GAAATGGTTTGTACATGATCGTATTGACGCAAT<br>ATTCTGTATAACAAATGAACATACATTTTTGAAC    | NA                         | NA                          |

| Marker IDs    | Genetic positions (cM) | Chromosomes      | Physical positions (bp) | Flanking sequences/Forward primers                                                                               | ICC 12968 | ICC4958 | Flanking sequences/Reverse primers                                                                                                                                                                                                                                                          | Annealing temperature (0C) | Amplified Product size (bp) |
|---------------|------------------------|------------------|-------------------------|------------------------------------------------------------------------------------------------------------------|-----------|---------|---------------------------------------------------------------------------------------------------------------------------------------------------------------------------------------------------------------------------------------------------------------------------------------------|----------------------------|-----------------------------|
| Ca-II-SNP1171 | 22.78                  | Ca-desi-LG(Chr)7 | 470261                  | TTCTCAATATTTATTTCTCCCCTTGTTAGCTTAGA<br>CTATTCATTAAAGAGCATCATCTTTAGGAATCATC<br>ATTATCTCATCAAGTATGAGGTACTTCAA      | T         | A       | GTGATAATAAAAGATGGATGCATGGTATGATAT<br>ATGTTTACGTGATGATAATGATGATTTTTGATTG<br>ATGATAGTATGTTATAAAATTGTGATGAGAAT                                                                                                                                                                                 | NA                         | NA                          |
| Ca-II-SNP1172 | 23.72                  | Ca-desi-LG(Chr)7 | 500019                  | TTATTTTAGTGATTAAGTAGGAATTTTCGTAATTT<br>TACAGTGC GTTGTGTTTTGGTGCAGTGC TGAATTT<br>TGGTGAGAAATCAACATAACATATGTAGC    | T         | G       | TCTGGTGTCTTCATGAACATTGTAGCTATGGAT<br>CTTAGCTTTTCATTTGCACCTTGGTTAACTCCAAT<br>TGGACATCTACAACCTCCAGATATGGCTGAAATA                                                                                                                                                                              | NA                         | NA                          |
| Ca-II-SNP1173 | 24.66                  | Ca-desi-LG(Chr)7 | 502609                  | TGCATCTGGGTTCC TTAATTGTT CATA CATGCATG<br>TTGATTTTCTGAGATTGAATAGGTGTTAATGTTGC<br>ATATATGTGAGTTGTT CATGTGTTTTATGA | T         | C       | GTGGTTGTGCATTTTAAACAAACAGTTGGAGTG<br>CAGTCATGTTTTGTGGGAATTAAGGTGCAAAAAG<br>TGGTTGTGCATTTTAAACAAACAGTTGGAGTGC<br>A                                                                                                                                                                           | NA                         | NA                          |
| Ca-II-SNP1174 | 25.60                  | Ca-desi-LG(Chr)7 | 618120                  | TATTTATGTTTATGTAGTTAGCTCCTTGAGTCTCG<br>AAAAGGAATCGAGACCGTTGGCACCAGTTAGCG<br>GTGGGGAGAACTCTGATATATTAATGTTGTT      | A         | G       | TAATTATGAACACATTAATTTCAACAAACATGAA<br>TCACCAAAATTTCCAACATTAATCACCCATATT<br>CAATCTCCAAAATTTCAACCATAAATTACCA                                                                                                                                                                                  | NA                         | NA                          |
| Ca-II-SNP1175 | 26.54                  | Ca-desi-LG(Chr)7 | 642019                  | GATGACTAGTAAATAATTCTATGGTTTGTCTAGA<br>ACTAGGAGTCGTCTCAGATTCATGTGCAGGATTG<br>AATTCATTTAGTTGATTATTTGATTTCTGTC      | C         | T       | CGGAGAATCTTGGGTTATGTTGTGTTGTTGGGT<br>TCCATGTCACTCTTTGTGGAGAACTTACAATAT<br>TAGTGCCTCTAGTCGTCACTCGCGTCTGCTCTC<br>TTTTCCCTAATCCTGAAAATAAGCTGCATGGA<br>CGCCGGCGGCTCAGATTC AATGGCCGCGAAT<br>ACAACACCGCCGACGAGATGTGGAGTGAACAA<br>GCCGGCGACCTCAATAAGAAGACTCTCTGGTA<br>CGCCAACTCTCTCTTACTCCACCTCTTA | NA                         | NA                          |
| Ca-II-SNP1176 | 28.42                  | Ca-desi-LG(Chr)7 | 684110                  | TTCTTCTTTTCGGTGTGTACTCTCATGTTTGT<br>GTTCTATTATCTATCCTTATTTATATTTCACTGTTA<br>AAATAAAAGGATACATTATATGAAGTTT         | A         | G       | AAACAAACGTAAACATATCCAACAAAGCAAGCC<br>TCAATTTCAAAAAAAAAAACTCAGTTTCAATAAAT<br>CAACCTAAACAAAATTTATTTTAAATCCTAAAA                                                                                                                                                                               | NA                         | NA                          |
| Ca-II-SNP1177 | 29.36                  | Ca-desi-LG(Chr)7 | 765277                  | TGCAATTCTCTGTATACAATTTGAGTTTTACAATA<br>TGAATTTAAAATTCATATTGCAATTTATTTTTAGG<br>GACATCAATTTCAAGTTTGCATTGGGCT       | T         | C       | CAAAACGTGAGCTTATAGTTGATGACCATAAAT<br>TAAATTACACTATGAAATTCATTATCATATTGTA<br>AAACTCGAATGATGATACATAAGAATTGATG                                                                                                                                                                                  | NA                         | NA                          |
| Ca-II-SNP1178 | 30.30                  | Ca-desi-LG(Chr)7 | 770412                  | CACCTTAGAACTACCATGCCTATCCAGAAACTA<br>TACTGCTATCCTTTAAATCTTCATCAGACTCCAGG<br>GGAAGACCCTAAC TTTTACCATCTACCT        | A         | C       | TTGGTTAAGGCATGGATTTGGTTAGATCATGTC<br>TTGTGGCCTCTGTT CATAGAGTCTGAAATTTGGT<br>TGCAAGAGAAATGTTCTGAGATATATATTAT<br>G                                                                                                                                                                            | NA                         | NA                          |

| Marker IDs    | Genetic positions (cM) | Chromosomes      | Physical positions (bp) | Flanking sequences/Forward primers                                                                             | ICC 12968 | ICC4958 | Flanking sequences/Reverse primers                                                                                                                                                                                                     | Annealing temperature (0C) | Amplified Product size (bp) |
|---------------|------------------------|------------------|-------------------------|----------------------------------------------------------------------------------------------------------------|-----------|---------|----------------------------------------------------------------------------------------------------------------------------------------------------------------------------------------------------------------------------------------|----------------------------|-----------------------------|
| Ca-II-SNP1179 | 31.24                  | Ca-desi-LG(Chr)7 | 845234                  | ACTGATGTCAGTATGTGATTGAAATGAAAATTATT<br>TGATTTGCTGGGAAATAGCATGCTGCAAGGATC<br>TGAATATATGGTAGTTATGTTCTATGTAGTT    | T         | C       | TATTCATATACATATTCATATATTGACAACAACA<br>CATATTCATATAACTACATATTCACAACCTTTTCA<br>AATGTGCCCTATTCATATACATATAACTAACA                                                                                                                          | NA                         | NA                          |
| Ca-II-SNP1180 | 32.18                  | Ca-desi-LG(Chr)7 | 870350                  | TCTTGTGTATAAATAGATTTGTTGTCAATCTGCTC<br>CATTATTCGAATGATTTTGAAGTGTGGTTTTGGT<br>TGACAACCTCAGTATTTCTATGGCCAATTTT   | T         | A       | CTAGTGCTAGATTTTGGAAATGCCTCTTCATAT<br>TTCCAGTAAATCTGGAGTTAATTGATCAATTA<br>AAGGTTTGTATTAAGGCAATCCAAAACAGTTAA                                                                                                                             | NA                         | NA                          |
| Ca-II-SNP1181 | 33.12                  | Ca-desi-LG(Chr)7 | 925631                  | CAAAGACTATGTTCCGGTCTACTAGCTGTTAAATAT<br>AGGAAGGATCCAATCATCCCTCTATACTCTTTTTCT<br>AGATATTGGAGTTCCTTCATCATCTTTGTG | G         | A       | TCTTCATATCTCAAGAAAAATACACCAAGGATC<br>TACTCAACAAATACAAAATGAGTTGAGCCAAAA<br>GTATGGGAACCTCTATGCATCCATCCTCCATAC<br>T                                                                                                                       | NA                         | NA                          |
| Ca-II-SNP1182 | 34.06                  | Ca-desi-LG(Chr)7 | 929639                  | ATTGACACACTGTTTTTATACTGGTTCACCCAA<br>AGATGGCTACTTCCAGTCCCTCACACCCTTGTGAG<br>ATTTCACTAATGTTCAAACAGATCAACCTCT    | A         | G       | TCACACTGTAATTTCCACGTGAGGTACACTTGG<br>AAATATTTGAAATCTGATTGTAAGCTTGGTAA<br>GCTTGAGAATACACAAGTTGTAATCATCCTCGG<br>T                                                                                                                        | NA                         | NA                          |
| Ca-II-SNP1183 | 35.00                  | Ca-desi-LG(Chr)7 | 944691                  | GATGACTAGTAATAATCTATGTTTGTCTCTAGA<br>ACTAGGAGTCGCTCAGATTCATGTGCAGGATTG<br>AATTCATTTAGTTGATTATTTGATTTCTGTC      | A         | T       | ATGCATCACAACTGGAATGATACGGTAAAATTA<br>AATTTTAAAGTAAATGGAATAATATATAACCAA<br>TTATCATTGAATCCCAGATCCAGAATAAGAAAA                                                                                                                            | NA                         | NA                          |
| Ca-II-SNP1184 | 37.82                  | Ca-desi-LG(Chr)7 | 975862                  | TAACTTTTTGTTGTTTTTCATCAAACATTAATTTG<br>AGATTTTGTCTCAACAATCTCCCCCTTTTGTATGA<br>TGACAAACATGTTAATTTAGATTTTAATT    | T         | G       | GGGAGCTTTGTTAACTTGGACGAAAATGGAGA<br>AGAAGTATAACATAGATGAATACAAAGGCCAAA<br>CAAGATTACCCAATTTTGAATTCAAAAAAATA<br>TGAACCTCACTTACTACCTGATTTTTCAGCATG<br>CACTTTTTCTGGCACTGTGCAAATTACTCTTTCT<br>ATCAAAGAAAACACCAAGTTCATTGTCTTAAACT<br>CCTTGGAA | NA                         | NA                          |
| Ca-II-SNP1185 | 38.76                  | Ca-desi-LG(Chr)7 | 1003445                 | TACAAATCTTACATCCTCCAATATTTGTCAACTCG<br>CCAAAATCTGATGTGGCACATTCCAAATTCATCT<br>TCTATTCGAATATGTTTTATTTCTTCAATA    | C         | T       | TTTTTAAAGTATTGATGAGTCATTGAGTGATAA<br>GTTAAAATTAATTAATATAATGATGAAATAAT<br>TGACTTGGGCAAGTGAATGGTTTGCATTAT                                                                                                                                | NA                         | NA                          |
| Ca-II-SNP1186 | 39.70                  | Ca-desi-LG(Chr)7 | 1045780                 | TCTTAGCATTTAGATATGATGCCATTATAGTTGG<br>TGATATACTGATTTATCAATTTTGTGTACGGCTATT<br>GTGTTTGTATGTCTAGCGATGTTCAATTTGA  | G         | A       | CAAAAAGAATGAATTAACATTTAGATCAAGAAAT<br>TTCCCTAGTTCTGAAATACATATAGAATGAAT<br>GCATCATTATTTAATACAGCCCTAAGGAAGA                                                                                                                              | NA                         | NA                          |

| Marker IDs    | Genetic positions (cM) | Chromosomes      | Physical positions (bp) | Flanking sequences/Forward primers                                                                           | ICC 12968 | ICC4958 | Flanking sequences/Reverse primers                                                                               | Annealing temperature (0C) | Amplified Product size (bp) |    |
|---------------|------------------------|------------------|-------------------------|--------------------------------------------------------------------------------------------------------------|-----------|---------|------------------------------------------------------------------------------------------------------------------|----------------------------|-----------------------------|----|
| Ca-II-SNP1187 | 40.64                  | Ca-desi-LG(Chr)7 | 1066575                 | TCGTGGATTGCCATATCACTCTTGAATCACAAAAG<br>TAGTCTCCCATTTTATTCTCCCAAGTTTTGGTC<br>CCTCAAACAGAATTTGGTCTAAAACCTTGA   | C         | T       | TTGAATTAAGTTACACCATCATCAAGATCTCGT<br>GGTGTAACAATTGTACCTGAAATCTATGATCAT<br>AAATGGTGTGGTGTGACTTAAAAATGACATTT<br>C  | NA                         | NA                          | NA |
| Ca-II-SNP1188 | 41.58                  | Ca-desi-LG(Chr)7 | 1090742                 | CAAGGGCTTCGTGGGTCTTCCAAGCAACACCAC<br>TAACTCGAGCTTCGTGGGTCTTCCAAGCAACAC<br>CACTAACTCTAAATCCCCGCAAGGATCTGTGG   | A         | G       | TGATTTTGGACGCTCTGGTTGAGTGATCTATAT<br>TGTTACTAACAGAAGTGTCTACATTCATGCATT<br>CATAGTTGTGTGGTGCCTCCATAATTGGTTGGA<br>G | NA                         | NA                          | NA |
| Ca-II-SNP1189 | 42.52                  | Ca-desi-LG(Chr)7 | 1095355                 | TAACTTTTGTGTTTTTCATCAAAACATTAATTTG<br>AGATTTTGTCTCAACAATCTCCCCCTTTTGTATGA<br>TGACAAACATGTTAATTTAGATTTTAATT   | C         | A       | ACAAAGGGGGAGAATTATTTTAGATTTTATGTT<br>GGTTCAAATATATGAAGCATTTCTGAGGGGGA<br>GTTTTTAAGCTCTCTTTGATTAATAATTAGAATCA     | NA                         | NA                          | NA |
| Ca-II-SNP1190 | 43.46                  | Ca-desi-LG(Chr)7 | 1451148                 | TTCTTAAATCTACACTTTTCAAACCCACCAACAA<br>TCTCCTCAACATTTTTTTCATACATCTTCAACCGT<br>ATCACTGCTCCCTCTCTAGATTTGTTCT    | T         | C       | TAAAGATAAATGAAAAATAAAATAAAATTAATA<br>ACTATATAAAATAATTTAAAAAATCAGAATAGA<br>TTTCGGTATCACACAGATCTAGCTAATCCCTC       | NA                         | NA                          | NA |
| Ca-II-SNP1191 | 44.40                  | Ca-desi-LG(Chr)7 | 1468684                 | TAATTATCTCCATTTGTTGATTCCCTTTAGATGATA<br>GTGTTGAATATAATGTCTTAATTTATGATATCATG<br>TGCTAGTTTTTCATTTGAGTATCTCTAA  | T         | C       | AAGTTGGTCACAGCACTTGTCCCTGAATTTA<br>ATTGCTGCAATATCATATGCTTCTGCAGCCTCC<br>TCTTGTGTGCTATAGGATTGTTATGGTTCAAC<br>A    | NA                         | NA                          | NA |
| Ca-II-SNP1192 | 45.34                  | Ca-desi-LG(Chr)7 | 1483940                 | ATTATGATGAAACATTTGCTCGGTAGCCAAAATG<br>ACAATTGTTCCGATTGTACTCTCTATAGTTGCTTC<br>TAATGGGTGGACTCTTTATCAAAATGGATGT | G         | C       | AGGTTTTGAGCTTGACACACCATGAGATGAA<br>GAAAAATAGACCTTGAGGAGGAGTCATATAAATA<br>TCTTCAGTGAGATCACCGTAAAGAAATGCATTC<br>TT | NA                         | NA                          | NA |
| Ca-II-SNP1193 | 46.28                  | Ca-desi-LG(Chr)7 | 1503761                 | AATGATCATTTTGATCATTACCCCTTATCTTTGGTT<br>CAAAATGTTCTAAACACTTGTTCATTTGATTCCTG<br>AGACAATATTTGACTTGTGGTTCTCA    | T         | C       | AGAGAACATTCTCCTTTTTCAAAGGTGAATATT<br>GGTTTAAGAGTTCATGGGTATTGTGCCTACATT<br>GTGTTAGCACTTTTCAAATAGGTTTATAAACT<br>C  | NA                         | NA                          | NA |
| Ca-II-SNP1194 | 47.22                  | Ca-desi-LG(Chr)7 | 1617972                 | TTTTCTGGTTGACCAGATTTTTAATTTGTTGACTA<br>GATTCCTGGTGAACCTGGAACACTAGAAATCGAA<br>TTGGAAATGTTAGTCGGAATTGAAAATGA   | T         | C       | AGTGAAATTGAAGCTAGTGATTGGGAATTGGTT<br>CAAAATGATAAATCAATTGTTCCGTTATCAACG<br>AATTGAATTCTCATTATCAATTATCAGATCCG       | NA                         | NA                          | NA |

| Marker IDs    | Genetic positions (cM) | Chromosomes      | Physical positions (bp) | Flanking sequences/Forward primers                                                                            | ICC 12968 | ICC4958 | Flanking sequences/Reverse primers                                                                                                                                                                       | Annealing temperature (0C) | Amplified Product size (bp) |    |
|---------------|------------------------|------------------|-------------------------|---------------------------------------------------------------------------------------------------------------|-----------|---------|----------------------------------------------------------------------------------------------------------------------------------------------------------------------------------------------------------|----------------------------|-----------------------------|----|
| Ca-II-SNP1195 | 48.16                  | Ca-desi-LG(Chr)7 | 1649012                 | TGTAAC TGATGATCATGTGCCTCACCATGATGAGC<br>AGGTTCCAGTTGAGCCACCAGTCGAGTTTGAGTT<br>GAGAAGATCTACTAGAGAACGTCACCTTCT  | A         | C       | TTTAACCACTTTTCTTATCAACATTTGTAATAG<br>GTTCTTGATAAATACTCTGGCTCTCCACTATCAG<br>TGATCATCACATACTCATGTGGAGGATATCTTT                                                                                             | NA                         | NA                          | NA |
| Ca-II-SNP1196 | 49.10                  | Ca-desi-LG(Chr)7 | 1698235                 | GAACTGTGCTGCAAATATTTCTGCATGAAAAGTCG<br>TAATAAAATGCTAAAGTTTTCTTAACTTTGCTGC<br>GGATTGTATTCAATTTTCTGCGGATTTA     | G         | T       | GTTACCTGCGGATTTGCCGGCAGAACCTTATC<br>CCCACGTA AACCTTCGTGGATAATTGTTACCT<br>GAGGATTTCACTATCCGCAGGTA AATTACCTGC<br>GG                                                                                        | NA                         | NA                          | NA |
| Ca-II-SNP1197 | 51.92                  | Ca-desi-LG(Chr)7 | 1721640                 | GCTGTTGTAGGGTCATATAGGGTCACATAGCGTT<br>TGCACATAATGCTTACAACCTTTTACAACGCTTT<br>TTGTA AAGCGCTGTA AATTGAAGCGCTCTC  | T         | C       | TTCACAAAAGCGCTTTAAAAGCCATGTAACAT<br>AAAGTGGGAGCGCTACATTTTACAACACTTTG<br>TTTAAAGCGCTCAAAAAGCGCTGTA AAGCTAT<br>G                                                                                           | NA                         | NA                          | NA |
| Ca-II-SNP1198 | 52.86                  | Ca-desi-LG(Chr)7 | 1776493                 | ATCAATCTTTATAACTTTAGGGACATATTTGTATAC<br>TCAGTCATTTTTTTTTATCTCAGACTTCCA AATTGG<br>TTTAATTTAATGGTATATATCAACAGCT | C         | T       | AAGCAAAAATGAGAGTGCTAGGATTAGAATATT<br>TGACCTTGTCTTTCTTAAAGAACACAATTAGC<br>ACAAGACTATAGATAATTCAATTGTCATCTTTAGT                                                                                             | NA                         | NA                          | NA |
| Ca-II-SNP1199 | 53.80                  | Ca-desi-LG(Chr)7 | 1791302                 | TTAAACATAATTTCCAGATTTTAAACAATCGAAT<br>TTCTCCCTGAAATCCCGATTCTCCGTTTACAGAA<br>TTCTCGTTATTTGCATCGTTCTTCTCA       | T         | C       | TTAAGGAAAATTACCATAATCATAAAACCAATC<br>AGTGGATAATATAGCCACTTTTTACAGATCGT<br>TTTGGCGTTAGTTTCACTCAAATCGGACTTACA                                                                                               | NA                         | NA                          | NA |
| Ca-II-SNP1200 | 54.74                  | Ca-desi-LG(Chr)7 | 1842420                 | ACTGCGTTTTGGAGCATAAACCTAAATTTGCAG<br>TTCCA ACTCTAGCTCGTGATTCGATCAAGTTCATC<br>CACTTCATTCCTCTTCTTGATCATTGTTG    | T         | C       | AAAAATAAAATTCATTTAAAACCCAAATTCAAA<br>AAAACCGTAATCGAAAGAAAGAAAAGAAAAC<br>TAACCAAGAAATATCAGAGAGAAATGAAGAAC                                                                                                 | NA                         | NA                          | NA |
| Ca-II-SNP1201 | 55.68                  | Ca-desi-LG(Chr)7 | 1855882                 | TCTAAGTACACTTCTTCTTTTTCCACATGTCAAAC<br>AAGATTGACTTCAA AATATTGAACTTTTTTTTCAT<br>TTACATGGCAATTTACCTGTCAATGGA    | T         | G       | ATTCATCACTTGATCTACAATAGTCTCAGACAA<br>CAACTTTTTAAGCATCTTAGAACACTTTCCAAG<br>CTTCTTCTTTTATTCTCATCAATTCATAACCA<br>ATGCAATCAACACATTTCTTCTTGAGGCATA<br>GATCCCATTGCTCTTATCACACAGTTTCTACAA<br>TACTTTGCACTACAAACA | NA                         | NA                          | NA |
| Ca-II-SNP1202 | 56.62                  | Ca-desi-LG(Chr)7 | 1868303                 | CATTGATTGTA AATGAAATTTAAAGGCATATATTT<br>CAAACCTTTATTGGAATCAATGTGATGTTATTTGA<br>CTTTTGCTTCGACATTGTAGCACCTCTT   | T         | G       | AATATTCATTTATTTCTTATATATATATATAAT<br>GTGTTAGTTAATGCTATAATAATCACATTTATTT<br>ATTCGATAGTCTTTACAAGTTTTTCGAGCT                                                                                                | NA                         | NA                          | NA |



| Marker IDs    | Genetic positions (cM) | Chromosomes      | Physical positions (bp) | Flanking sequences/Forward primers                                                                           | ICC 12968 | ICC4958 | Flanking sequences/Reverse primers                                                                               | Annealing temperature (0C) | Amplified Product size (bp) |    |
|---------------|------------------------|------------------|-------------------------|--------------------------------------------------------------------------------------------------------------|-----------|---------|------------------------------------------------------------------------------------------------------------------|----------------------------|-----------------------------|----|
| Ca-II-SNP1203 | 57.56                  | Ca-desi-LG(Chr)7 | 1916451                 | GATTAAATTTAGTTTGATTAATACCATGATGATCTG<br>ATGGATGATACTCTATATTATTCATTTTTCTCGGT<br>ATTATATTGGAGTCAGGCAAAACATCTG  | G         | A       | TTATTCATCAGATCATAATGGTATTAATCAAAT<br>GCATTTATGGCTAGAACAATAATTTTTCCATGA<br>TTGGATATTTGAATCAAACAGATTGGCATGT        | NA                         | NA                          | NA |
| Ca-II-SNP1204 | 58.44                  | Ca-desi-LG(Chr)7 | 1922382                 | CAATCTTCCTTTTTTTTACAACAATTTCCCCATT<br>TTTTTGACAACATTTTGTATCATAAAAGTGTGCAA<br>CAAACCTCATTCTTGACTCATTAAATTG    | A         | G       | TATTTATGATATTTTTAAAATTCATTTTGAGATG<br>ATAAAATAAGTCAAATTTGGTCAAATTTACTATGT<br>TTTTAGTGAAAAAATATCAAATTTAATATT      | NA                         | NA                          | NA |
| Ca-II-SNP1205 | 59.32                  | Ca-desi-LG(Chr)7 | 1938849                 | CAAAGCCTCCTCTTTGTTGATGTTTTCTCTCA<br>ATTTATAGACTAAAATGATGAATCTTTATATTCATT<br>AGATAAAATTGAGTTCTAGATTATTACTT    | G         | A       | CCCTAAAACAACACTACAATTTTACCATGTATACA<br>AGAAATAAAAAAGTGCATTCTCTCTTTCTGGG<br>TTTACCTTAGGAAATCAATTTTTCTTCAAAAA      | NA                         | NA                          | NA |
| Ca-II-SNP1206 | 60.20                  | Ca-desi-LG(Chr)7 | 1949027                 | TTCTATTAAGTTTGAGATTACTTTAGTGGTTGATTT<br>TTTAGTTTCCTTTTATTTTTGTTTTATTTTATTAT<br>TATTATTATTATTATTATTATTAT      | A         | T       | TTTATTCGAAGATTAATAAAGCAAAAAATACT<br>CAAAATATTGAAACAATAAAACTCAAATCAA<br>TTATCAATAATGATAATAACAATAATAAT             | NA                         | NA                          | NA |
| Ca-II-SNP1207 | 61.08                  | Ca-desi-LG(Chr)7 | 1958630                 | GAGTCTTCGTCGCTGGCAAACCTCGAAGGAAT<br>CATCATTACTCAAACCTCCTGGGAAGTCACTTTCA<br>AGGCAGATGTCCTATCAGGAGAGGGTTTCAT   | T         | C       | TGAAAAACAACAACAATTTCTTTAACCACAAAC<br>GGGGTTGAGGGATGAAGGAAGTGTGAGAAGG<br>ACACCTAAAAAGCAAAAGAGTAAAAGAAAATGT<br>TTC | NA                         | NA                          | NA |
| Ca-II-SNP1208 | 61.96                  | Ca-desi-LG(Chr)7 | 1962522                 | ATGAAATAAATATGTTTTGGTATTAAGTGGGGGA<br>AAATTGGAGTTTGTACATGGTTGTGGTTTGTGAT<br>GTGAGTATGATCTAAAACCTCAATGTAGGC   | T         | A       | GAGGAGATGGCCTACCTGTTGAGAATTGCTG<br>CATGCATCACTTTCTTCAACCTAAATCTATAATG<br>AAATCTTCAATTGAATAAACTCGTCTATTGCTT       | NA                         | NA                          | NA |
| Ca-II-SNP1209 | 62.84                  | Ca-desi-LG(Chr)7 | 2036771                 | AAAATTCACCCACACTTTCTTAATAAGAAGGTTG<br>GTGGTCAAAGAATATTTTGCAACACAGCTGTTTTTC<br>TTATTCGGCTCTAGACTGGCCAGCACGTGA | C         | T       | CCAATGCACAGCAGCCAAAACCTTTTGTGGAA<br>TGATTCTTATCCTCATCTTTGCTGAAGCTCTTG<br>CCCTTTATGGTCTCATTGTTGGTATTATCTTGT<br>C  | NA                         | NA                          | NA |
| Ca-II-SNP1210 | 63.72                  | Ca-desi-LG(Chr)7 | 2042539                 | TCAATTTCCATACCAAGGATTCTCTAGCTGCTCC<br>TAAGTCCCTCATTTCAAATTCAGAATTAAGTGATTT<br>CTTCAAACCTGTTGATAGCATTATATCAG  | A         | C       | CAATAGAAGCTCTTATGACTGTTGTGTCTATTT<br>CAAAAAAGAAGGTTCAATCAACTTCATATATCTA<br>TTACTCTATGTAGATGATATGTTAATAGCTAGT     | NA                         | NA                          | NA |

| Marker IDs    | Genetic positions (cM) | Chromosomes      | Physical positions (bp) | Flanking sequences/Forward primers                                                                          | ICC 12968 | ICC4958 | Flanking sequences/Reverse primers                                                                               | Annealing temperature (0C) | Amplified Product size (bp) |    |
|---------------|------------------------|------------------|-------------------------|-------------------------------------------------------------------------------------------------------------|-----------|---------|------------------------------------------------------------------------------------------------------------------|----------------------------|-----------------------------|----|
| Ca-II-SNP1211 | 64.60                  | Ca-desi-LG(Chr)7 | 2075045                 | TAATTTTCTGAGATGGCTCAATGAAAGTCCTTCT<br>ACATAGTGTGACCTTATCAGCCCTTGCTGAAAAGG<br>AACACCAGCTTTTGCAGCATAACCAAGTGC | T         | A       | CTGTTTACGAGTCTCGTAGACGTTTCGGGGAG<br>ATACTTGCTACCGAGAGTCTGTTGATTGTGAT<br>GTTGTCATAGCTGTTCTGACTCTGGTGTGTT<br>GC    | NA                         | NA                          | NA |
| Ca-II-SSR373  | 65.48                  | Ca-desi-LG(Chr)7 | 2084209                 | GGATGCAACCTCATAAAGTTATAAAAA                                                                                 | (AT)9     | (AT)10  | TAAACTCATTGACCAGCGG                                                                                              | 60.05                      | 181.00                      | NA |
| Ca-II-SNP1212 | 66.36                  | Ca-desi-LG(Chr)7 | 2091776                 | CAATCACAATGTTATAGATTTATTGAAACATTTCT<br>TTCAAAATTGGGTTTGTCTTTCACGAACCCATTC<br>TTTTTCAATGGTACCATCATAATATCAG   | A         | G       | GTTGAAGAATTTTCTAGGTTTCTTCTGTGTTG<br>CTGAATAAGTTTTCTGGATATATTTCTTTTGT<br>TTTCTTGACATATAGACCCACAGGAAGCCAAAG        | NA                         | NA                          | NA |
| Ca-II-SNP1213 | 68.12                  | Ca-desi-LG(Chr)7 | 2127007                 | GATCGCCGTTTGGCGGTCACCTCCACATAGTTG<br>TGAGGGGAGATATGTTGGGTTTGGGCTCCCTT<br>CCTATGTGGAGAAAGGCCAATATGTGCAAGT    | T         | C       | TTGCTTCTCTCTCACTTTTCTTTGTCTCT<br>CTCTGAATTCAGCTCTTTCACACCCACTAATCT<br>GACCTCTCCACTTGGAATAAGTGAGACATG             | NA                         | NA                          | NA |
| Ca-II-SNP1214 | 69.00                  | Ca-desi-LG(Chr)7 | 2163724                 | AGATGGATTTTTTCTCCATGGACCAAACTTTTTT<br>TCATTTCTTCTCTCGCCCAATACATCAGGAATG<br>TCTTGTAAGTCTTTTAAATCTTGTGT       | G         | A       | TGGGTCATCGAGTCTTTTGGATTCAAATCATG<br>TTTGGAGATCAAATGCAATATCTTTGATGGAA<br>AACCAGAATATAGTCTCCACCCTCCTTGTAG<br>A     | NA                         | NA                          | NA |
| Ca-II-SNP1215 | 69.88                  | Ca-desi-LG(Chr)7 | 2190171                 | AAGGGACAATAATTCAAAGTCTTCTTTCTCTT<br>CATTTTTCTTATTAAAACCCAATAACTTCAATAA<br>TTCTAGCTAATTCATTTTTGAGGTAGTT      | C         | A       | TGCAATAAGTATGATGCAAGATCTAAGAAAAC<br>ATGGTAAATGATAATGTAGTACTAATAGTTTAT<br>TATAAGTTCATTGCAATAAGAACAGTAATTAAG       | NA                         | NA                          | NA |
| Ca-II-SNP1216 | 70.76                  | Ca-desi-LG(Chr)7 | 2196332                 | TCAGAGAAAAGTCCCTTATATCTTATTGGTTAC<br>TCCAGGGTCCAAGTTGGAACTTACAACCTTGTGT<br>CGGCTTCTACTCTCTCTGCAGCTCTAAGG    | A         | C       | TTCTGCTGCTGCCAAGGAGGAGGAGAAGAAGG<br>ATGAATTGATGGTATAGTCTATGTTACTGATCC<br>TGGATTTGCTATGCAGAAATGAGGTGTTGAGGA<br>TA | NA                         | NA                          | NA |
| Ca-II-SNP1217 | 71.64                  | Ca-desi-LG(Chr)7 | 2204432                 | GTTATGAATAAGTTATTGGTTCACATTGTTCTAG<br>AAATTGTACAACGTGTCTGTAATCATCTGTCATG<br>ATACTTGAGGTGTTAGCTCAGTGATAAGAG  | C         | T       | GACAGATGGGTTTTTTTATTAATCAAAGTGATA<br>CTAATAGCCACTTTACAATTGCCCTCAGGGGA<br>TTTGAATTCGGTATCTTGAAGTTACAAGATTAA       | NA                         | NA                          | NA |

| Marker IDs    | Genetic positions (cM) | Chromosomes      | Physical positions (bp) | Flanking sequences/Forward primers                                                                          | ICC 12968 | ICC4958 | Flanking sequences/Reverse primers                                                                                | Annealing temperature (0C) | Amplified Product size (bp) |     |
|---------------|------------------------|------------------|-------------------------|-------------------------------------------------------------------------------------------------------------|-----------|---------|-------------------------------------------------------------------------------------------------------------------|----------------------------|-----------------------------|-----|
| Ca-II-SNP1218 | 72.52                  | Ca-desi-LG(Chr)7 | 2227761                 | TCACCTTGATTTTTATTTTATTACTTTTTTGTGTC<br>TCACTCGATCATTTTAATCATCCATCTTTGTGAAT<br>TGTGAAATATTTTATTTAAATTTGATA   | G         | T       | ATGAATTTTGGATTTCGATTTTGAAACCAAAATA<br>TTAATCATTATGATTACTCTATTAATGTTAATAA<br>CAGTTTGAATGTTTGTAAATAAAATTCTAAT       | NA                         | NA                          | 255 |
| Ca-II-SNP1219 | 75.16                  | Ca-desi-LG(Chr)7 | 2230354                 | ATGTGATGAAGAGTCATCAATATTCTACCTATTTG<br>CTAATTTTTTTCAAATATTTATTGTTGTAGTCA<br>GAGTATTATTTTGTAGGCATATTTAATA    | A         | T       | TCTTTTGAAGACACAATAATAAGTCTACTATGAA<br>ACTAAATATGGATATTTTTTTGTTTTTTTTTTT<br>GGAAAGCCACTATACTTTTCATGTTGTAGATG       | NA                         | NA                          | NA  |
| Ca-II-SNP1220 | 76.04                  | Ca-desi-LG(Chr)7 | 2262437                 | TTACCTGTCCAATCACTTTAGCCATGGCTGGATCA<br>TAATCTGTAAAGATTGTTTTTGGTTGTTGTTTCC<br>CATACTCTCCAAAATGCTTTGAACAACCA  | A         | G       | AAAATTTGATTTGTGCCCTTTGTTGGTGTA<br>ATCATCATTATCAAATGTCATGTTTGGTTGTG<br>CCTGTTATTTGATGATACTGAAGTTTCTTTTAC           | NA                         | NA                          | NA  |
| Ca-II-SNP1221 | 76.92                  | Ca-desi-LG(Chr)7 | 2282511                 | TACAATCCCTAATAAGTTGGACACTCTGAATTTCA<br>GATGTATGCTCTTCTTCTCTCTCGTCAACTCTAT<br>CATCTATAACCTCATGAAATGAAATATTAT | A         | T       | TAGTTTCTGTATGCTGTTTTAATGACCCTGTTA<br>TTACTTTTTGGTTAGATGGAAGTAGGGGACACT<br>GAATTTGAACAAATTAATAAGAAGAACAAT          | NA                         | NA                          | NA  |
| Ca-II-SNP1222 | 77.80                  | Ca-desi-LG(Chr)7 | 2353501                 | CTTCCTTCAAGTGGATGGCATGGTCATGCCCTCTA<br>GAGGGTGGTAGCCCTTAGGATTTTGAATACCT<br>CCTGAAATTGCTGCAATAACTCCTCTAACTC  | C         | T       | ATGGGGCATTGATGCAAGTATTGTTGAAAGAAG<br>GTGAAGGGTTCGTGATGCAAGGTGAGATAGCA<br>ACAGAACTTCAGCAGGAGAAACAGCAGGTCTC<br>AGG  | NA                         | NA                          | NA  |
| Ca-II-SNP1223 | 78.68                  | Ca-desi-LG(Chr)7 | 2355113                 | TTTTTTCATTGAGCTTCATGGAGCTCCATTGCA<br>TCTTCAATATTTCAAGATCTTCTCAATTCCTTGA<br>ACTCATTGTTCCCGTTGCTTTCGTTTCTG    | G         | A       | ATCACTGGTATCAGAGCACCGATCTAGGTGCC<br>CTGAGGGAGTGGAAACCACCATACGAGCGTTGC<br>TACAATCGTCTATGATTTTTACCAGAAGCATGG<br>CAA | NA                         | NA                          | NA  |
| Ca-II-SNP1224 | 79.56                  | Ca-desi-LG(Chr)7 | 2417406                 | ACTGTGATCCATGTTGGCCTGCTGCTTTATTCCTT<br>GACATTAACAAAAATATTGAAATATTTACAGGTGA<br>GGATTGGGAAGAATGGTGTGGAGGAAATT | C         | G       | TGGGAGGCAAATTTGATTCCTTCTCAATAGAT<br>GATTTGAGTTTCAGACTTGAGGTTTTCAAGGCT<br>TGTTGCTCGAAATCTGAGAGAGGACCTAAGCC<br>AA   | NA                         | NA                          | NA  |
| Ca-II-SNP1225 | 80.44                  | Ca-desi-LG(Chr)7 | 2427737                 | GTATTAGCACGATATGATGAAGAGGGTGCAAGAA<br>TTTATCGAGGCTTGTGATACTTGTCAATGTCAAAA<br>ATATGTTGCAACCCTCCAATCGGCTTGCTG | C         | T       | ACCACCACAAAATAGCTTCATAGTTATTACTTT<br>TTGGCAGACTAGTAAATGAAACCCATCAAGATTT<br>CGCTCCAAAACAACACTGGAATGGGAAGTGGC<br>T  | NA                         | NA                          | NA  |

| Marker IDs    | Genetic positions (cM) | Chromosomes      | Physical positions (bp) | Flanking sequences/Forward primers                                                                          | ICC 12968 | ICC4958 | Flanking sequences/Reverse primers                                                                               | Annealing temperature (0C) | Amplified Product size (bp) |    |
|---------------|------------------------|------------------|-------------------------|-------------------------------------------------------------------------------------------------------------|-----------|---------|------------------------------------------------------------------------------------------------------------------|----------------------------|-----------------------------|----|
| Ca-II-SNP1226 | 81.32                  | Ca-desi-LG(Chr)7 | 2503483                 | ATGGCAGTACATCATCACATCTTCTCTATCATCT<br>AATACACATGCCCTCAATAAATCTTCCAGGGACTG<br>ATTCGTTCTCTCAGTCTGTCCGTCGGTTTA | T         | C       | AGTATTGTATCAGACCGTGACCTGAAATTCACG<br>TCGCAATTTGGGAGCGTTGCATGAAGCTTTG<br>GGAACGAAACTAAGATTGAGCTCAGAATATCAT<br>CC  | NA                         | NA                          | NA |
| Ca-II-SNP1227 | 82.20                  | Ca-desi-LG(Chr)7 | 2525183                 | TTGTTTCTTCATAAATAAGATTTAATGAATGACAAT<br>TAATTGACCATTTTGTGATGTAGGCGTCACTTCC<br>TAATTCCTTAAATGTTGTACCATTTTCTC | C         | A       | TCTGTTTTGTGTGTTTAAATGCATTTTAAAGTTTC<br>TAAAGCTTTAAAAATAATGTGATGAAGCAAATG<br>GAGAGCAAAGCCATTAAGCATTCAAATAGAA      | NA                         | NA                          | NA |
| Ca-II-SNP1228 | 83.08                  | Ca-desi-LG(Chr)7 | 2545091                 | GGTCATTGAAAACACATTTTCTGAAATTGGGGAG<br>AGCACATAAGAGAATTTTAGGGGGCCATCGTCC<br>AATGTTGTTGCTTCTGTTCCCTCCTACCATTG | G         | A       | CATAGCATGTGATTGAGTGGCAAGAAGTATTTG<br>AAGCTGTTCTGCAATATCAGATATTTGGGAAGC<br>AGTCTCAGATGAGTATACAGAACCAGAACTAGA<br>G | NA                         | NA                          | NA |
| Ca-II-SNP1229 | 83.96                  | Ca-desi-LG(Chr)7 | 2570445                 | CTAATTTGGATACACAAATTCACATATACAATAGT<br>AACATTACTTGATCTATTTTTTGTGACTCTGCTC<br>TTTCTCTGCCCTGAACAGCTTGCTTTC    | T         | C       | AGAATAGTACCTATAAGGTCTATGCAGCATACA<br>CCTACTGACATTATTGCTGCTTCAATGACAAGG<br>TTTCTTATATCTGCTCCAGAGAATCCAACAGTA<br>C | NA                         | NA                          | NA |
| Ca-II-SNP1230 | 84.84                  | Ca-desi-LG(Chr)7 | 2574968                 | TTTTCTAGAGTATCCCTTCTACCTTCATCAGTAAT<br>ATCATCACCAAATACAACATGTTCCAGCACATTACC<br>GCAGTGTATCTCATGCCATGCTTCTTGT | G         | T       | ATGGACGGGGAAATTCATGAATGATGAGACC<br>GCCTAACCAAAGTTTCCCTCTTATGATTGTGA<br>ATCTTGATTGACTGACAGATGAAACTGATTGAG<br>AG   | NA                         | NA                          | NA |
| Ca-II-SNP1231 | 85.72                  | Ca-desi-LG(Chr)7 | 2652130                 | ATAGTGCAATTAACATTGATGGTGATCTCCTAAAT<br>CTAGTATTGTTAGTAGAAGCTGAACCTGTATCTCT<br>AGAGGAAGCACTGGCTCACCTCATTGGAA | T         | G       | ACACCCACTTCACTTCTATAGCCTTCTTATTTCT<br>TGGAAGCTTACCATTTCCAGGTTTTGTTCTT<br>GTGAATTGATCTCAATTCCTCATCCATAGCATC       | NA                         | NA                          | NA |
| Ca-II-SSR374  | 86.60                  | Ca-desi-LG(Chr)7 | 2717077                 | GCCACACTAGAGTCCTCGCT                                                                                        | (ATTT)9   | (ATTT)7 | GTGACTGAAGAACCACCAA                                                                                              | 59.63                      | 180.00                      | NA |
| Ca-II-SNP1232 | 88.36                  | Ca-desi-LG(Chr)7 | 2734808                 | GGAAGCTTCCAATGGCAGTCAACGGGTGGACTCT<br>AGTGCTAGTCGACAGTCCGAGGCTGGAACATGA<br>TTCAAGGTGTAAGTGGCAGCTCCAGTGCCGGT | A         | C       | GAAAGTGGTGCATCTACATTAGTGCGTGTA<br>TATGGATCACATGGGAGAATATTGAGATCAACT<br>GGGGCGACTCCACATTTCCAGCCTCCACCTG<br>TC     | NA                         | NA                          | NA |

| Marker IDs    | Genetic positions (cM) | Chromosomes      | Physical positions (bp) | Flanking sequences/Forward primers                                                                            | ICC 12968 | ICC4958 | Flanking sequences/Reverse primers                                                                                                                                                                                                                                                               | Annealing temperature (0C) | Amplified Product size (bp) |    |
|---------------|------------------------|------------------|-------------------------|---------------------------------------------------------------------------------------------------------------|-----------|---------|--------------------------------------------------------------------------------------------------------------------------------------------------------------------------------------------------------------------------------------------------------------------------------------------------|----------------------------|-----------------------------|----|
| Ca-II-SSR375  | 89.24                  | Ca-desi-LG(Chr)7 | 2813514                 | CACAAACAAAATAGATAAACAAACAAA                                                                                   | (AG)7     | (AG)6   | TTGACATCTGGTGTGGATGAA                                                                                                                                                                                                                                                                            | 57.94                      | 110.00                      | NA |
| Ca-II-SNP1233 | 91.00                  | Ca-desi-LG(Chr)7 | 2821353                 | ACTTTTAAGATTTTTATAGAGATGGTGTAGATCCA<br>CTATGATTGGAAGGCCATAACCCATGAAGGTTGA<br>ATTTGATGGGTACATTGGGATTGCATGGCAT  | C         | T       | TTGTACTACTACTTAGCACTAGCTATGGTGCTT<br>ATGACTATTACAAGTTGGCCCAACAATGGCCAA<br>CAACCTATTTTAGACATTCTCAAACCATAAA                                                                                                                                                                                        | NA                         | NA                          | NA |
| Ca-II-SNP1234 | 93.64                  | Ca-desi-LG(Chr)7 | 2900339                 | TAAACTTTATCTATCTTTTCTTCTTATTCACAATC<br>CATAAAATGCAACAATCTTAGGGGCCGACTAATTT<br>GTGCAAAATATTTTTTTGCTTTTAAAAG    | C         | T       | TATTGATAAAGAAATTATAGAAACGTTTATTTTG<br>AAAAATATTTTCTATTTTTATTTTTAAATTTAT<br>GTTGATTTTACTTATTAATAAGAAGATAAAA                                                                                                                                                                                       | NA                         | NA                          | NA |
| Ca-II-SNP1235 | 94.52                  | Ca-desi-LG(Chr)7 | 2931394                 | GGCACACATGGCTACAATCTCTCATGATTGAACATA<br>CATGTTCCCTTTTACACTCTTATATGTTGTTATGTG<br>ACAACCTCATTGCTGTTCTAGTTTTGCAT | G         | C       | AATTCAAATTCACATGTTGGTCACATGAAGGACA<br>ACTAGAGACTTAGACAGTACCTGTTTCAAGGCA<br>AAATGAATGTCCTATTCATGTGCTTTGTACAA<br>G                                                                                                                                                                                 | NA                         | NA                          | NA |
| Ca-II-SNP1236 | 95.40                  | Ca-desi-LG(Chr)7 | 3057424                 | TCGTGGATTGCCATATCACTCTTGAATCACAAAAG<br>TAGTCCCTCCATTTTATTTCTCCCAAGTTTTGGTC<br>CCTCAAACAGAAATTTGGTCTAAAACTTGA  | A         | G       | TTGATTCAGATTTCAATCCAATTTATCATGGCC<br>GAAGAAGGAGATAATGGGTCTCTAAAATCTTCG<br>CCATTGACACCGTATGAAGAAGCGTTGAAGC<br>CTTGTATCTTTGATTACTAAACGCACTCGTGT<br>TGGTGATGTCAATATGGAGGAGCGATTACAGCG<br>TGCTATTCGAGTACCTAAAGATGCTTGAATTGG<br>AGGAGGCGATTTCCAATTTGAAGGTTATCCATG<br>TCTCTCCAGCAAAAGCCAAAGCATCTACATCC | NA                         | NA                          | NA |
| Ca-II-SNP1237 | 96.28                  | Ca-desi-LG(Chr)7 | 3176106                 | TATGTGCTTGACAAGAATGTAATCTTGCTCCTACG<br>TATCTCCCGGTGCGATGGAGAAATCAAAGCTACG<br>TAGTTATTGAGTAAGAAATGTTGATGTGTTG  | G         | A       | TCGTATTTCAAATATATTTCTTTTCCAGTCAAAA<br>CAAATTCATTTTCTTTCTCGTCAAAAACATTTT<br>TTTATATAACAAAACCCATTTTCTTTTAAAAA                                                                                                                                                                                      | NA                         | NA                          | NA |
| Ca-II-SSR376  | 97.16                  | Ca-desi-LG(Chr)7 | 3377852                 | TCTAACATTTGGTCACGCCA                                                                                          | (ACC)5    | (ACC)6  | AGGTGGGTGGTATAATGGA                                                                                                                                                                                                                                                                              | 60.11                      | 101.00                      | NA |
| Ca-II-SNP1238 | 99.59                  | Ca-desi-LG(Chr)7 | 3392731                 | TCCACATTAATTTGCATCTTCAACCTTTTTTTGGT<br>AGGTTTTTTTTCTTTTATTTTTAGAAGGCTAAT<br>GGTCGTGTCGATTATCTAGCCAATTTAG      | A         | C       | AGTGAGGTAGATAAGCCCCCTTACATCATAGG<br>CTAAAATAAGTTTTAAAGAATGAACTAATCGTG<br>CACAAGAGTCCAATTTGAAAGACTAGATTGAATG<br>A                                                                                                                                                                                 | NA                         | NA                          | NA |

| Marker IDs    | Genetic positions (cM) | Chromosomes      | Physical positions (bp) | Flanking sequences/Forward primers                                                                             | ICC 12968 | ICC4958 | Flanking sequences/Reverse primers                                                                                                                                                                                                                                                                                                                                                                     | Annealing temperature (0C) | Amplified Product size (bp) |     |
|---------------|------------------------|------------------|-------------------------|----------------------------------------------------------------------------------------------------------------|-----------|---------|--------------------------------------------------------------------------------------------------------------------------------------------------------------------------------------------------------------------------------------------------------------------------------------------------------------------------------------------------------------------------------------------------------|----------------------------|-----------------------------|-----|
| Ca-II-SNP1239 | 100.40                 | Ca-desi-LG(Chr)7 | 3397685                 | CATTTGCGCTATCATATTTCTCTATGTAGATGACTT<br>ACTCATATTTGGTTCAAACATTCATGCTGTAATAT<br>TGTGAAATCATTGTTGTGTAACAACCTT    | G         | A       | GTAGGTTTACAGTCAAAGTATTTGTATTTCTTTA<br>GGATCTTTTCTGACCTAGTAATCTTGATCCAA<br>CGATTACACTCGTTTCTCTGAGGTCTTTCATAT                                                                                                                                                                                                                                                                                            | NA                         | NA                          | NA  |
| Ca-II-SNP1240 | 101.21                 | Ca-desi-LG(Chr)7 | 3400244                 | TTCCAATGGAGAGCTTGTGGCATTATAGAGAT<br>CCAAGCCCTTGATGACCGTTGGAATCATTTTTCA<br>AAGGATCCAAGTTTTTCATCATAATTACA        | A         | G       | CTTGCACTCTGATTAAGGGAAAAACAAGGAC<br>ATGTCAAAGTCAAAGCTATGCTGCGAGAGGAT<br>GGGATCTGCCTGGCCTAACAGCTGAATGACA<br>GTT                                                                                                                                                                                                                                                                                          | NA                         | NA                          | NA  |
| Ca-II-SNP1241 | 102.02                 | Ca-desi-LG(Chr)7 | 3414861                 | GATGGTGAGGCATCATCAAATAATGTTGATGAAGT<br>AGAAGTCACTAATACTCCTCTGATTTGTGGCCTTC<br>CAGATGATATTTCTCTTTTGTGCCCTGCAA   | C         | G       | TTTATGCTTTCTGCGATAAAAAACCACTCGTC<br>ACTGCAAACAAAGTCCCTCCATCTTTTCGAGAC<br>AGCCTTTAGAAGTGAATGATATTTCTAGGAAC<br>T                                                                                                                                                                                                                                                                                         | NA                         | NA                          | NA  |
| Ca-II-SNP1242 | 104.45                 | Ca-desi-LG(Chr)7 | 3467534                 | CAAAGACTATGTTCCGGTCTACTAGCTGTTAAATAT<br>AGGAAGGATCCAATCATCCCTCTATACTCTTTTTTC<br>AGATATTGGAGTTCCCTCATCATCTTTGTG | T         | G       | GCTCTCTGGTAATTATTTCCCGTTAAAAATCTT<br>CACCAAATTTGTTAAACTAAAAACCTAATCCTC<br>TTGGGTAGACCCCGTTACACCCCAATCCTCT<br>TCGACGCTGTTTGCTTAAACCCGTTGACAACCG<br>CTTGTAACACGTCGCGATTCCAATTTACTTT<br>GCGGCGAATTTCTCTGACTCTCGTTTGTACGA<br>ATCAACTTGAGTTGGAGTTGCACTCAACTCAAC<br>CCCGCCGAAACCCGCCCCACTTCCTCTCG<br>TTTTTGAACAATTTTTCTTTTTCTTTTTGGTTT<br>GTTTCTTTCTACTTATGGAGCCCAATGCCAC<br>ATCATCTGAAATAACTTATTCATTTTTTACT | NA                         | NA                          | 234 |
| Ca-II-SNP1243 | 105.26                 | Ca-desi-LG(Chr)7 | 3474237                 | CCGTTAGAGTTGTGCCAATGATCATCACGGTACT<br>GTCAGGAATAAATATACACGGTTAGTGGTGGACT<br>CTATCTAATAAACTCTTGAGTTATCGTTG      | G         | T       | TTTTTGAACAATTTTTCTTTTTCTTTTTGGTTT<br>GTTTCTTTCTACTTATGGAGCCCAATGCCAC<br>ATCATCTGAAATAACTTATTCATTTTTTACT                                                                                                                                                                                                                                                                                                | NA                         | NA                          | NA  |
| Ca-II-SNP1244 | 106.07                 | Ca-desi-LG(Chr)7 | 3502394                 | TCCTATTAGCGTTGGCTCTCGAAGCGTCATTCCCTT<br>CTTGGCGACATGGTTTCCCTATAAAATCATTATCAA<br>GTAGAGTCTTAACACTACTTCAAATAATAC | C         | T       | ATAGGTTAGGAGTTGTTATCTGATCATGTGTGCG<br>GTTTAGGTGACTTGAGTTGTCAAGTCCAATATG<br>ATTATTATGAGTTGTTATAGTCGGACGTTAGTT<br>T                                                                                                                                                                                                                                                                                      | NA                         | NA                          | NA  |
| Ca-II-SNP1245 | 106.88                 | Ca-desi-LG(Chr)7 | 3521319                 | AGAGTTCTTGCAAGTGTATGCTAATTTCCGATTGT<br>CATGTTTGAATTTGAAATAATCATAGTATTTTTTATT<br>GATTGCTTAATTTCTAAGAAGATTGTAGA  | C         | T       | TCTTAAGTACAACAAGTCAATGATTGATAATACT<br>CAGAAAAAGAATGCTACTGATCCAGCATTGAAC<br>AGTCCAATGTCATGAACCAGAGTATGCAGCCA<br>C                                                                                                                                                                                                                                                                                       | NA                         | NA                          | NA  |
| Ca-II-SNP1246 | 107.69                 | Ca-desi-LG(Chr)7 | 3524538                 | ACTACCGACCCCTTGA AAAATAGCCTTGTCCCTCA<br>AGGCTGAAATATGCATCAAGTATCCTTCCCTTCTT<br>GCTGCCAATCTTCTCTGACCAAAAAC      | T         | A       | GGAGAATTTCAATTTCTATGAAAGTTACTACTT<br>ATGAGTATTGCTGGTATTGGTTTATCCACCTT<br>CATGGCTGGCTCAATTTTCTATTTGATAGAAGC                                                                                                                                                                                                                                                                                             | NA                         | NA                          | NA  |

| Marker IDs    | Genetic positions (cM) | Chromosomes      | Physical positions (bp) | Flanking sequences/Forward primers                                                                           | ICC 12968 | ICC4958 | Flanking sequences/Reverse primers                                                                                | Annealing temperature (0C) | Amplified Product size (bp) |    |
|---------------|------------------------|------------------|-------------------------|--------------------------------------------------------------------------------------------------------------|-----------|---------|-------------------------------------------------------------------------------------------------------------------|----------------------------|-----------------------------|----|
| Ca-II-SNP1247 | 108.50                 | Ca-desi-LG(Chr)7 | 3536403                 | ATTGTTATAATCAACTTGTTAGAAGCAACTACTCAA<br>GTTCCAAACCTTTGTATTCAATCCCAATGGTGGTG<br>TTATTGTGCCTTCAACATTTTGAATTGT  | T         | C       | CCTGACCCCTCAAATCATTCTACTCAAACGGTC<br>TGACAACCTTCAAACCTTTGAGGAACACACACCT<br>CGACTCTACCAACCAAGTCTTCTCCACATAATC<br>T | NA                         | NA                          | NA |
| Ca-II-SNP1248 | 109.31                 | Ca-desi-LG(Chr)7 | 3551690                 | ATATATATATATATATACTCTAATTTGGAACCGT<br>TGCGAATGTCCTTAAAACTAGTGCAATTTACTTTT<br>ATTTCAATTTGGGTTTCAGGGTGTACAT    | A         | T       | ACTATTAGACGATTGACTATTAGACGACTGACA<br>TTTGACTCACATTAACCTGACACTCAACCAACT<br>CGGCCTGATTGGACAGACCTGCTCTGATACCA<br>CT  | NA                         | NA                          | NA |
| Ca-II-SNP1249 | 111.74                 | Ca-desi-LG(Chr)7 | 3554353                 | TTCTTTTGTCTGATTGTTGACTAAGTTAATTTAAG<br>TGTCATTTCTATTGTTGTTACTGATTGTATTAGGCA<br>ATTAATTCATCATCACTAGTTGATTTG   | G         | A       | TATTTAACTTAGAAAACCAATTAAGTATAATCCA<br>TAATTCATTTTTTTTTTCAACTCAATTAATAGT<br>CAAAAATAATTTCAAGTAAGTAAAGGATAG         | NA                         | NA                          | NA |
| Ca-II-SNP1250 | 112.55                 | Ca-desi-LG(Chr)7 | 3603706                 | ATTTAATCACAAATATCATTATTTATCGATTTTT<br>TTTAGTTAAAGTGTGGGTAAACGGGTATGGGTACG<br>GGCACTTAAGTACCCAGAGGGTAAGGGTA   | C         | T       | GGCAATGGGTAGGGTACTACAGTACCCGTCCC<br>CATACCCGCGATTAAAAAATACCCATACCCG<br>TGCCCGTACCCTCTTGGGTATCACTTTAATAC<br>CC     | NA                         | NA                          | NA |
| Ca-II-SNP1251 | 113.36                 | Ca-desi-LG(Chr)7 | 3670182                 | TTGTCCATTTTCAGGATTTATCCTATAATTTATTCTA<br>TTCTATAATCCTGGTTCTTGATCCGAACTTCTTC<br>CCATCTGGTCAGAAACCTGTCTAAGGAA  | T         | C       | CAAAATCAGCCTGTTCCCTTGGAATATGTTTT<br>CAATAAATTAACCGGGTTAAACGAACATTCCC<br>TTCTCCGGGTCTCGCTTCTGAAACGGCGCTCC<br>A     | NA                         | NA                          | NA |
| Ca-II-SNP1252 | 114.17                 | Ca-desi-LG(Chr)7 | 3697179                 | TTTTTATACTGGTTCGACTATCAATTCGATAGTCTA<br>CATCCAGTCCCAGAAATCACTTACCGATTCCAGCCT<br>TTACTAGAAATGATTGAGTATGTTTACA | T         | G       | TGATCTTGCTAGAGCTTGGTGATTAGTTCTTAA<br>GGATAGATTGGTTGTTGTTGATGATTGATTTG<br>AGTTAGATGTATAGGCATTGAAGTCTGGAAG<br>T     | NA                         | NA                          | NA |
| Ca-II-SNP1253 | 114.98                 | Ca-desi-LG(Chr)7 | 3702391                 | TTTTATGCACATTTAAGTATTATAAATGATGTGCTG<br>ATATGGCTTGTGCTATCTGATGACAATTCATACC<br>ATCTTAGAAATGGGTTGAGCCTAACTCA   | G         | A       | GGGTGTGTGTGAAGAGTCCCACATTAGATGA<br>GATATTATGACCTCAAATGAGTTTATATGGTG<br>GAGGCACCTCACCTTAGCAATCAGTTTTGTAG<br>GG     | NA                         | NA                          | NA |
| Ca-II-SNP1254 | 115.79                 | Ca-desi-LG(Chr)7 | 3729362                 | ATGTC AAGCATATCCGGCTTTGTAATTTATTTGT<br>ATTTCTGCTATTTGAAGTCTTTGTTTGATAATTT<br>TCTTGGTCATTTCTATTACTAATTTCTT    | C         | A       | TTTAACTATAGAAATATGGCCCAATTCCTTAGA<br>ACCTTGAGCGAACTAGGATCCAGAAGAAGAGA<br>TAAAACCATGATACTTTCTACTTCATCATCTATA       | NA                         | NA                          | NA |

| Marker IDs    | Genetic positions (cM) | Chromosomes      | Physical positions (bp) | Flanking sequences/Forward primers                                                                           | ICC 12968 | ICC4958 | Flanking sequences/Reverse primers                                                                                | Annealing temperature (0C) | Amplified Product size (bp) |    |
|---------------|------------------------|------------------|-------------------------|--------------------------------------------------------------------------------------------------------------|-----------|---------|-------------------------------------------------------------------------------------------------------------------|----------------------------|-----------------------------|----|
| Ca-II-SNP1255 | 116.60                 | Ca-desi-LG(Chr)7 | 3815555                 | ATTGCTTCTAACCTTGCTACTGGGGCGAATGTTTC<br>ATCAAAGTCAATCCCTTCTCTTGATTGTACCCTT<br>GAGCGACCAATCTTGCTTTGTTGCGGACAA  | G         | C       | CGAAAGAACCAAGTATGGGAACCTGTTCTCAA<br>TCTTGAAATAAACACATCATTGGTACACAATG<br>GGTGTAAAAATAAACTTGATGAGAATGGTAT<br>A      | NA                         | NA                          | NA |
| Ca-II-SNP1256 | 117.41                 | Ca-desi-LG(Chr)7 | 3823467                 | TTAAGCAACCGGTCTCTCACCCGACCCACAAAA<br>ATCTCACGCTGTAACCTTTCTGCAACCGAGAAACG<br>CACGATTTACAGCGCTTCTACGATTAAGCACG | A         | G       | CATAAACAGCATTACACTAAAGCACTTATATCAT<br>AAGCACTTATCATATAACTGTATATTTGATTGA<br>CTGTGAGTGTGGCAAAATTACAGAGGATCG         | NA                         | NA                          | NA |
| Ca-II-SNP1257 | 118.22                 | Ca-desi-LG(Chr)7 | 3845687                 | TTTTTTTACAACATCCAGAATTAAGGGTTAAAGTC<br>GCCTTTGGGGCTGCCTGACTGATTTTACCCCGTC<br>CTCCAGTAGTATCCTATGCATACACATGGAT | G         | A       | GCCAAACTTGAAGATGAACAGGAAGAGAAGTT<br>GTTGCAGATTTTGAGAAAACACATGAAGGCAAT<br>CGGATGGACCTTGGCTGATATTCTGGTATTAG<br>CC   | NA                         | NA                          | NA |
| Ca-II-SNP1258 | 119.03                 | Ca-desi-LG(Chr)7 | 3849555                 | ATTTTGACTGTCGTACCCGTATAAGGAACCTATAC<br>GGACTTCTATTCCTTGATTATTTTCTTCTGATTTT<br>CACGTGAAATTTGGAGCAATCCGAGACA   | A         | G       | AAGACCAATTCGAACTTTGCTGGGTCTAAATT<br>GCAGATTTTATAATCTGGATTTTATAATAATTT<br>TACAAAAATCATATTAACCCTGTTTTAAGCGA         | NA                         | NA                          | NA |
| Ca-II-SNP1259 | 119.84                 | Ca-desi-LG(Chr)7 | 3859205                 | GAAGGACTCATGAATGATTCTTGATAAAACTGATC<br>CAATGATGTTAGAAACGGCCGCTTTGAGTTTCTA<br>TGCTAGGGCACAAAGTCTCCCAACTTCCCAA | G         | T       | CCAGGCGCGCCTGGAGCGCGTTTCTGAGCTT<br>GGGGCGCGGACGCGCATCAGCAACCATAAAA<br>ACGCAATTTTCACTGTTTTAGGGATCTTTTGA<br>CT      | NA                         | NA                          | NA |
| Ca-II-SNP1260 | 120.65                 | Ca-desi-LG(Chr)7 | 3870719                 | TGGAAGAAGTCTTTGATCAACTTGGTTGGACTTAT<br>TTCTTGCGTATCAATGAACCTCAATATCCTCACCT<br>TGTTAGAGCTTCTATGCTGCATCAATGG   | G         | A       | GCTCCATCATCTCAAATATCTAATATGTGGCAC<br>AAGGAGGCTGGGTTGATTTCCATATGAACCCC<br>TTTGAGCACAAATGTTGAAACCTTATTTCTTTTGA<br>A | NA                         | NA                          | NA |
| Ca-II-SSR377  | 121.46                 | Ca-desi-LG(Chr)7 | 3913998                 | CACGAGTAAGAAAATGAGCACAA                                                                                      | (TA)10    | (TA)11  | CCATCCTACAACAAAGCCC                                                                                               | 59.46                      | 144.00                      | NA |
| Ca-II-SNP1261 | 122.27                 | Ca-desi-LG(Chr)7 | 3917259                 | AATTTTGATCGCATGTTTTAATTTATTTTCACTTT<br>GTTTTTCTTCACTACACATAAATTTATTTGTTGAAA<br>ATCGATAATGTTCTTATCAATAACCTAT  | T         | C       | AAGATATAGTTTACTATCTGATTTATAGTAAAA<br>AACTATATCTCTTTTTTTTTTTTTTTTTGCA<br>ATAATAGTAACAAACTCGAGCTCCCTAATAA           | NA                         | NA                          | NA |



| Marker IDs    | Genetic positions (cM) | Chromosomes      | Physical positions (bp) | Flanking sequences/Forward primers                                                                           | ICC 12968 | ICC4958 | Flanking sequences/Reverse primers                                                                                | Annealing temperature (0C) | Amplified Product size (bp) |    |
|---------------|------------------------|------------------|-------------------------|--------------------------------------------------------------------------------------------------------------|-----------|---------|-------------------------------------------------------------------------------------------------------------------|----------------------------|-----------------------------|----|
| Ca-II-SNP1262 | 125.51                 | Ca-desi-LG(Chr)7 | 3940097                 | TAGTTGATAAAGCAATGGTACATGTTTTTGCAT<br>GACCAACTTATGAGAGATTTACCAAGAAATTGGCA<br>AGCTCCACTTGTGTTTTCTTTCAACTT      | A         | C       | TCTTTAGATATCTTTTTGGCACCACCAATCTTAG<br>AATCTAGTATAAAAAATGCTGAAATCTTGACCT<br>CATAGCTTATTGTGATGCTGACTATGCGGGAGA      | NA                         | NA                          | NA |
| Ca-II-SNP1263 | 126.32                 | Ca-desi-LG(Chr)7 | 4002075                 | TTTAATCCATGACAAGTTATTCCTCAGGGTGAAAA<br>TTTTTAGGTCGAAAATTAGCCAGTGTTTTGATGT<br>ATATAGATAATTTTAGTGGATCTTGACTT   | T         | C       | TCGAGGTC AATCTGTATCTCAGAAATAGCTCGC<br>CTCACTTCAGAACGAAGTGTTCATATATATCA<br>CCAACTCCTGGCTGATTCCCTTTGTACGCACTGC<br>A | NA                         | NA                          | NA |
| Ca-II-SNP1264 | 127.13                 | Ca-desi-LG(Chr)7 | 4075651                 | AAATTCCTTCATCTTCTTCACTATCATCTACAAC<br>AACAAATAGATATTTTGAAC TAATCTATTTGAGGAA<br>GTGTTCTGTTTTGGATGAGGTTAAACTT  | T         | C       | AATCCAAACCTAAAATGAAAGACAAATAAAAAAA<br>AAATCTAAAACCAATGTAACACTTCCAACAATAT<br>ATTTTCTAAACAAATTAGCAAACAATCTCCGC      | NA                         | NA                          | NA |
| Ca-II-SNP1265 | 127.94                 | Ca-desi-LG(Chr)7 | 4081355                 | TAAATAAAATATTAATGTCGCGGCCTAACTTTGG<br>CTTTTTCTTTGCTATTACTACTCTGTTTTTTCT<br>TCTTCTTTACGGTGTTTTTTTCTTAGT       | G         | A       | AACTTTATAAATACACCTTATCAAATTTCAAAAA<br>GGGGGGGATCTGAAAATTAACATTGCTGATAA<br>AAAACGCATAGAAAAGAAGGAGAAAAAATTGGA       | NA                         | NA                          | NA |
| Ca-II-SNP1266 | 128.75                 | Ca-desi-LG(Chr)7 | 4096273                 | TCGTCTTCGGATTGGTTACCGATGCGTGGATCTA<br>AAGAAATTA AAAATGATCGCTTTGGATTGGTTAC<br>TGATGTGTAGATCTATAGAAAAAATGATCGT | A         | C       | TACCTTCAAGATTGGACCAATTACGATCTATGC<br>ATCGGTAACCAATCCGAAGACGATCACTTTCAT<br>TTCTATAGATCTACGCATCGATAACCAATCCGA<br>A  | NA                         | NA                          | NA |
| Ca-II-SNP1267 | 129.56                 | Ca-desi-LG(Chr)7 | 4105738                 | TACTTGCCAACTCTCTTATGTCGATTTTCAACACTT<br>CAGAAATTCATCAAAACTTGGTGGTTGCCAGTA<br>TATCGATAAGGATTTCCCTTCTCTAGGGA   | A         | G       | GGCGTTGGCTCAGTACTACGACCTCTCTTAA<br>GATGTTTACCTTTCAAGACTTTCAGTTGGCCC<br>CCGACATTAGAGGAATTTGAGCGAATATTGGGT<br>TA    | NA                         | NA                          | NA |
| Ca-II-SNP1268 | 132.80                 | Ca-desi-LG(Chr)7 | 4131862                 | TGTGTCATTTATTCCTTAACTCACTATCATTATC<br>GATGCAGGTTGCTTACTTGTTC AAGTCTATGA<br>CTTGGGCTATAGAACTAAGAACTCAAAC      | T         | C       | AAATTTATTGATAAAACAACCTTAAATGACACTT<br>GAAAAGGAAAACAGTAGTATCTACACATACATA<br>CCTTCATGTTGATCACTGCAACTTTACTGGAAG      | NA                         | NA                          | NA |
| Ca-II-SNP1269 | 133.61                 | Ca-desi-LG(Chr)7 | 4168119                 | TTTGTGTGGGGCACATACAAGTGGTCATAAGG<br>TCCATCTTGTGGTTGGGACATGTGTTGCAACAA<br>AAAATCAATGGTGGATTAGGTGTAAGAAAC      | C         | A       | CCTCCCATATTTACTAATAAGAACCTTGCACCA<br>AAGATCATCAAGTGTGTAATAGATTCCACCA<br>TATTTTCATGAGAAAAGTCTATTTCATACGATGA        | NA                         | NA                          | NA |

| Marker IDs    | Genetic positions (cM) | Chromosomes      | Physical positions (bp) | Flanking sequences/Forward primers                                                                          | ICC 12968 | ICC4958 | Flanking sequences/Reverse primers                                                                              | Annealing temperature (0C) | Amplified Product size (bp) |     |
|---------------|------------------------|------------------|-------------------------|-------------------------------------------------------------------------------------------------------------|-----------|---------|-----------------------------------------------------------------------------------------------------------------|----------------------------|-----------------------------|-----|
| Ca-II-SNP1270 | 134.42                 | Ca-desi-LG(Chr)7 | 4191368                 | AAGATCCCTAAAACAGTAAAAATCTGCGTTTTTAT<br>GGTTGCTGGTGCGCGTCCAGGCGCG<br>GAAAAACGCGCTCCAGGCGCGCTTGGCAGAG         | G         | T       | AAATGCAAAATACATCAGACAGCAGATGCTGTG<br>CGCCTGGAGCGCGCCCTGCGCGCTGGAGCG<br>CGCCTGCGCGCTGGAGCGCATTCTCAGGA<br>TCGG    | NA                         | NA                          | NA  |
| Ca-II-SNP1271 | 135.23                 | Ca-desi-LG(Chr)7 | 4201107                 | GATCATACTGCCAGATGTCTCTAGCATCTCTTTC<br>AAAGTTTCTTCACTGGGATCTAGCATCTCTTCAA<br>AGTTTCTTCACTGGGATTTTCGGCAGTATC  | C         | T       | AAGAAACGGGAGAAAGCTCTACTCGACAAGAA<br>CAAACTCTGAAATAAAATTGAGCGACAATTT<br>GCAAAAATAAATTTGAAGAAAACCCCATGGAT<br>AT   | NA                         | NA                          | NA  |
| Ca-II-SNP1272 | 136.04                 | Ca-desi-LG(Chr)7 | 4241579                 | CGTATGCATAACACCATACGTCTTTAAGGCTCTT<br>TCTCCTACAAATCATCTTCAACATGTTCAATTTCT<br>TTCCCATCACACTTCTTCAAACCATTTG   | G         | A       | GCGTGTTGGTTTCAGATCGACAATGGTAGCTAT<br>GTTAAAAAGAGTAACGGGGAGCATACCATAAG<br>GAATGTGAAAACATCATTTGAGGACCTCTAAA<br>TG | NA                         | NA                          | NA  |
| Ca-II-SNP1273 | 136.85                 | Ca-desi-LG(Chr)7 | 4253650                 | TGACAAGTTTTGGTTATTTTTGGAGATATCATT<br>AATATTTCAATTTGGTTTCTGAAAAGTGGGATC<br>AGTACTTTTTAAATGAAAAGAATGCTATT     | T         | G       | TGCTTACAGAGAAGTAGAAGAACAAAAAGTT<br>CCATGCTTTCAAACAAGGGACACAAAGAAGTA<br>AAAAATTTCTTGTGACATAAAAGTAGTGATTCA        | NA                         | NA                          | NA  |
| Ca-II-SNP1274 | 137.66                 | Ca-desi-LG(Chr)7 | 4325967                 | CAACATCAGTCAGGTATGAAGGTAAGTTTTAGTT<br>TTTCTTGATGAAGTCAAAGCTATCTCCGGTAGTG<br>GTTTGGTGAATATGTCAGCCATTGGTGTT   | T         | C       | ACATATCTTACTATTCTAGAACTAAACATAGAG<br>ATCAGACACCACTTCATTAGGGACTTTGTTCAA<br>AAAGGGGTACTAAACATTTCAATTTGTAGACATT    | NA                         | NA                          | NA  |
| Ca-II-SNP1275 | 138.47                 | Ca-desi-LG(Chr)7 | 4360750                 | AATGAGGAATGGAGTGCATTTGTTCCAAATGTTT<br>GGACCCCGCATTTGTCGTAAGTGATTAATTTATTA<br>GCATTTGTGTTTTATTATTCATATTCGTAG | A         | C       | CGTGATTTTTGTATGGGTGGTTGGATTGCTT<br>GCCCTTTCGCGATTTGCCTTACTAATTTTTATA<br>TAAATAAAATAGCAATTGTGTAATAAATAAC         | NA                         | NA                          | 150 |
| Ca-II-SNP1276 | 139.28                 | Ca-desi-LG(Chr)7 | 4367175                 | TCTCCGTTACGTAAACTTACGCTCGTTTCTAC<br>GAACCCTACTCTCCTACCAACTATTGATTTCTG<br>CGTTGTTCTTTTTGTTGATTTCTGCGT        | C         | T       | GTAGTCTAAGTACGTAGCAGTATAAGTTCAACA<br>TGCAATTTAGTGACAACAAAAATTAATAAATAC<br>AATACCTGAAAAATAGAAAAACAGTAAGGTTAC     | NA                         | NA                          | NA  |
| Ca-II-SNP1277 | 140.09                 | Ca-desi-LG(Chr)7 | 4376143                 | TCTCCCTTTCTTATGTCAGTATATTTATGAGC<br>GGTTATGTACCTTTGCTCTTTCGAATTTTATGAGC<br>GGATGTTATGTCGATTTTCGTTGATTTTT    | T         | G       | AAGGATTACGACACAACAAACCGCTTTAAAAGA<br>CTACGACACACAACTGCAACAAAAGACTACGA<br>TACAAAAACCGCTCATAGTGGTATTAGGACCAC<br>T | NA                         | NA                          | NA  |

| Marker IDs    | Genetic positions (cM) | Chromosomes      | Physical positions (bp) | Flanking sequences/Forward primers                                                                           | ICC 12968 | ICC4958 | Flanking sequences/Reverse primers                                                                              | Annealing temperature (0C) | Amplified Product size (bp) |     |
|---------------|------------------------|------------------|-------------------------|--------------------------------------------------------------------------------------------------------------|-----------|---------|-----------------------------------------------------------------------------------------------------------------|----------------------------|-----------------------------|-----|
| Ca-II-SNP1278 | 140.99                 | Ca-desi-LG(Chr)7 | 4395021                 | GGAGCATGTCTAGAGAGCTGTGAAAAACGAGCAC<br>TATACTCTGAAACTGTACACCTCCGTTTTGCTCC<br>AATCGCTCAAACCTCATGAGCTAATCCATCTC | T         | C       | GTTTGATATAGTGTACGTGGTAGACAAGTGG<br>GGTCACCTCCGTTAGCATGGAGAGAGTTTTCT<br>CAGTTGTTTCATGGCTCGTTTTCTCCAGAGAGT<br>GTT | NA                         | NA                          | NA  |
| Ca-II-SNP1279 | 141.89                 | Ca-desi-LG(Chr)7 | 4496371                 | TCACAAAGTGATAGATTCAATATATTTTTGGCTTTT<br>TGCCTGAATTATATGACACCTCTTCAATCTAAA<br>CCAGGTTTTGATTTTAATTTGAACTGCAC   | T         | C       | CAAACAACTACTTACATGAGCATCATAATGTTTG<br>GAAGTATCATCTCGTCTATTAGGATCCAAATTC<br>TTGTTCAAGTTTAACCAAGTCAAACATCCTCCTC   | NA                         | NA                          | NA  |
| Ca-II-SNP1280 | 142.79                 | Ca-desi-LG(Chr)7 | 4506937                 | ACTTTAATTGTCATATTGAGAGTGACTTTAACTGC<br>CATATTGAGGGTGAATTCTAGAACGTTTTCTAT<br>GGTGCAGTGGAACTTCGATACAGTGAATCT   | A         | G       | TGAGTCGGGACTAGGTCGCTCTCTTTAAGAC<br>GTTTCACGGCACTGCCAAATTTGCAAGGAA<br>GACTATCAACCACGAAGTCCCAGGAAAAACA<br>GCC     | NA                         | NA                          | NA  |
| Ca-II-SNP1281 | 143.69                 | Ca-desi-LG(Chr)7 | 4516212                 | TTTCCATATTGGTCTACCTCTCCTCTTTTGAAG<br>TGGTTTTAGGTGGTTCAATAGATGGCTGTGAGTT<br>TGTTTTGTAGGTGGCTCAATAGATTATTGT    | G         | T       | ATAGGGAAGCCACAACATAGTTGCCTAAAAGT<br>CTCCAAAAATAAGGGAGATCGAAAGCCAATTA<br>TGCACCATCTATTTAACCACTTGCAAATAGCT<br>A   | NA                         | NA                          | NA  |
| Ca-II-SNP1282 | 144.59                 | Ca-desi-LG(Chr)7 | 4520667                 | GAGGCCTTGCGACTCACATTCGACGCCAATTGTC<br>CGTCTTGAACCTCGTCTTTGAGGGTAGCATTACC<br>ATTAGTAAAAGTAATAATAAGTCATGGAAC   | C         | T       | GGGTTGGCACTATCCAATTCTCCATTCCTTT<br>TCAGTTGAATATGTTCTCTATGTACCAAGATGC<br>CCTTTTCGTTTACTTTTCTAATTTTGATTAATC       | NA                         | NA                          | NA  |
| Ca-II-SSR378  | 145.49                 | Ca-desi-LG(Chr)7 | 4528657                 | TTTCCTAATGAATCCCGCTT                                                                                         | (AT)16    | (AT)11  | ATTTATATGAAAACCTTGATTTGA                                                                                        | 59.92                      | 124.00                      | NA  |
| Ca-II-SNP1283 | 147.29                 | Ca-desi-LG(Chr)7 | 4561463                 | ATGTTACATTGTTTGTGTTTGATTGGTTTAAACCTT<br>TGTTTTGAAATCGTAGTTAGTACAAGTAAGAAAG<br>TCTTGAAGTTTGGGAGAAGCCTCTAATAC  | G         | A       | ATTCCAAATCTCATAAAAGGCTAAATGTAGAATA<br>ATATTTCTAAGGTGAGATTAGCAAAATTTGTCAA<br>TTTATTCATGAGATGATGAAAAATTATTAACA    | NA                         | NA                          | NA  |
| Ca-II-SNP1284 | 148.19                 | Ca-desi-LG(Chr)7 | 4571592                 | CAACGGATTGTGAGCTTTGAATTTATGATTGACC<br>AATCTCTTCAGAATTAATTATCTTTGATATGAAC<br>CTTTAGAGGCATGATGAGTTTGTACACAT    | T         | C       | GTCCAAAGACTGCCTCTAAAGAATGACTATGAA<br>ATTGAGTCTGAAGATTGCCTCTGAAGACTGAAT<br>TTGAAGCATGCCTCTGAAGCCCTTGATGTCTC<br>T | NA                         | NA                          | 155 |

| Marker IDs    | Genetic positions (cM) | Chromosomes      | Physical positions (bp) | Flanking sequences/Forward primers                                                                             | ICC 12968 | ICC4958 | Flanking sequences/Reverse primers                                                                                                                                                                                                                                                              | Annealing temperature (0C) | Amplified Product size (bp) |     |
|---------------|------------------------|------------------|-------------------------|----------------------------------------------------------------------------------------------------------------|-----------|---------|-------------------------------------------------------------------------------------------------------------------------------------------------------------------------------------------------------------------------------------------------------------------------------------------------|----------------------------|-----------------------------|-----|
| Ca-II-SNP1285 | 149.09                 | Ca-desi-LG(Chr)7 | 4629079                 | CAACCGTGAGATTTTTCTACTAAGTGTTCAGCCAA<br>TATCGTTCTTGATTTTCATAGATCAATCTTGATCTT<br>TACACAATTTCTACCTTTTTACCTAGAAA   | T         | G       | TTGTTAAAATAAGCTTGAGTGTTTGTAAAAATC<br>CTTTCATGTTTTGAAAGGTAACCTGCAAAATCC<br>TTTCTGAACTAGTAAGGTAGAAGTCTGAGGAAATC                                                                                                                                                                                   | NA                         | NA                          | NA  |
| Ca-II-SNP1286 | 149.99                 | Ca-desi-LG(Chr)7 | 4638355                 | ATCTTTTCTATTCTAACCATATTTCCAATCTACA<br>CTCATCGCTCTGTTAATACGTCGATTTCTTTATAA<br>TAGCCAAACTTCAACTCAGTTTCATGTGC     | A         | G       | CAGAAGGTGACGATGCGATGAAACACGATTGT<br>GAAGAAGATGGCCATGAAACTGAGTTTGACTAC<br>GGCGATTAACCTGAGTTTCACGATTGTAAAGAA<br>AT                                                                                                                                                                                | NA                         | NA                          | NA  |
| Ca-II-SNP1287 | 150.89                 | Ca-desi-LG(Chr)7 | 4641911                 | TCTTACTTCTCAATAGAGTCAATAAACCTCTAAA<br>TCGATAGCATGTGAGGTAGGGTGATGAGTGTGTC<br>TCTTTTTATCATGTTTTTATATTGAACTA      | A         | G       | TATGAATGGTGCAAACCTTGGTAAATACATAGA<br>TAAAACTAAAAAAAGTAATTAAGTGAGACAT<br>CTTCCACTTTAAAACTATTTTTGTATGAATAAG                                                                                                                                                                                       | NA                         | NA                          | 143 |
| Ca-II-SNP1288 | 151.79                 | Ca-desi-LG(Chr)7 | 4650844                 | TCCGCGATCTGCTATTTAGTACAAATTTGTGTCAA<br>ATAGCCCGCTATTGCGGCACCTAAAGCACTGTAGCA<br>TAGCAGAATTTGAACAAACCGCTATTTTCTG | C         | T       | TGCCAAATGTGTTTTACGTTTTTAATGAATTGG<br>CAGTTGGCAGGAGTAGAGAGAATAAACAGGTG<br>ATAAGGCATGAAGCAGTGTGTCAATTGCGGAT<br>C                                                                                                                                                                                  | NA                         | NA                          | NA  |
| Ca-II-SNP1289 | 152.69                 | Ca-desi-LG(Chr)7 | 4684570                 | GTGAAAATGGGTGGGTAGGACCACATATTTGTAG<br>TTGTTGATCTTGTAAGTTGAGAAATTTTGCTCAG<br>TGAATCGGTTTGTGTAACACCCCGATTTTTA    | A         | T       | GTATTATATGATATAATTATTTATGACTCTTG<br>TCGTTTTGCGTTACGACATATTATTTTATTAAGT<br>TGTTTTTAAAAAAAGACATGCACTCGCGTTG                                                                                                                                                                                       | NA                         | NA                          | NA  |
| Ca-II-SNP1290 | 153.59                 | Ca-desi-LG(Chr)7 | 4708534                 | TGATTGGAAGCAGGTTATCACCTTTCTCAAGAAGA<br>ACATATTCGCTCGCTTCGGCGTGCTCGAGCCTT<br>GATTAGTGACGAAGGCACCCATTTTCTAAAC    | C         | A       | TGCTGTGGAGACTTCAACTGCCCACTTGT<br>TGTGGATGGTATGGGGTTGCCACTCTATGACG<br>CACATTATTTCTTTAGAAAGTATCCATATTC<br>C                                                                                                                                                                                       | NA                         | NA                          | NA  |
| Ca-II-SNP1291 | 154.49                 | Ca-desi-LG(Chr)7 | 4710789                 | TCCCATTTGACCAATTTGTGAGTTACGTGAGGGG<br>AAAAAGGGTACCATTACACCTTAAGTCATCAATG<br>AAATCTTTGGCTGCCGAACCTATAGTGATTG    | G         | C       | CATCTCTATTTCTGACCAATCTGTGTCTGGTC<br>TGATAAAATGCGTAGGATTTCTGACTGCTTG<br>GTCTTATGTTGTGTTCCATAGCTAGAAAAGC<br>G                                                                                                                                                                                     | NA                         | NA                          | NA  |
| Ca-II-SNP1292 | 155.39                 | Ca-desi-LG(Chr)7 | 4718160                 | TTCTTAAATCTACACTTTTCAAACCCACCAACAA<br>TCTCCTCAACATTTTTTCATACATTTCAACCGT<br>ATCACTGCTCCCTCTAGATTTGTCT           | C         | T       | AAAGGATGTAGAGCTTTGGAAGTGAGTTTGTG<br>ACATTTGATAGCTGGAGCAAGTGAAGTGGAAAG<br>TAGAGAAAGCAGAGAAGCCTGAATAACAGGAT<br>CATCACAAGCACTGTCTATTAATCTTCCACGAG<br>CAAGTAAACAAAGCAAATGAACCTTGTGCACAA<br>GTTGAGCCAAATTCCTTGTCTTACGAGAAGGTC<br>GTGATTTGTTCTGTACAGAAGAAACAGGGG<br>TCATTTCAATTTCTATTTCTATAGCATCATCAT | NA                         | NA                          | NA  |

| Marker IDs    | Genetic positions (cM) | Chromosomes      | Physical positions (bp) | Flanking sequences/Forward primers                                                                    | ICC 12968 | ICC4958 | Flanking sequences/Reverse primers                                                                  | Annealing temperature (0C) | Amplified Product size (bp) |     |
|---------------|------------------------|------------------|-------------------------|-------------------------------------------------------------------------------------------------------|-----------|---------|-----------------------------------------------------------------------------------------------------|----------------------------|-----------------------------|-----|
| Ca-II-SNP1293 | 156.29                 | Ca-desi-LG(Chr)7 | 4721837                 | ACAAGCTCTTCGTCGGTGGTACCAGCTTCTTTCATCTATTTTAACTCGTCAAAGGTTAAATAATCGTTATAATAACAGTTTGGCGTCAGAGCTATCAATC  | A         | G       | GTATCACATTGTCCATCTGATTGTGTTTGTGAGTTTTATTCTTGTCTACTACTACCACAACTTTGGCATTAGACACATTATCATTACACTGGACAT    | NA                         | NA                          | NA  |
| Ca-II-SNP1294 | 157.19                 | Ca-desi-LG(Chr)7 | 4777755                 | AGAGTTAAGCATACTAGCAACAAGTTCATTAAGAGTTATGTTCTTTTTTTTCTTTCACTTTACCATTCACCTTCAAGTAATTATGGTGCAAGTTGTT     | C         | T       | TAACTGAAATTGAAAATCAATTTAGTATAAAGATTAAGAAGTCCAAGTATGATTTTAGTTTATTTAATGAGTTTTATAAGTTGTCTAAAATTATACATG | NA                         | NA                          | NA  |
| Ca-II-SNP1295 | 158.09                 | Ca-desi-LG(Chr)7 | 4875181                 | AAGCAAATAATTAACAATCCCTCCTTTGAACTTAGCTCTCTGAAGAGTTTCAAGTTCACCAACGCTCATCCCAAGTGCTTCTCGAATCTTCTGAAATGATG | C         | T       | TCATTTTCTAAGGGACTTAACCAAGAAGGTGTATCGAATTGGTTTATTCAGCACAATAAATGCACTAGCAGACATGATGACAAAGGCGTTAAAGTTG   | NA                         | NA                          | 117 |
| Ca-II-SNP1296 | 158.99                 | Ca-desi-LG(Chr)7 | 4928513                 | TGGGTAGAAAATGCGGATGTGTTGATTGCTTTTTAAGAAAATGCGTTCGGTTTCAATAAATTAAATTTGATGAGAAAAGTTGGTTATTTATTTGGATTT   | G         | T       | TCCTTTTAATAAAAATGACCAACTGAGATGCGACATCTTGTGAGTATAGTTCAAGACGCTTGAGTTGTGACAACTGGTGATTTAACTTTCTTAAC     | NA                         | NA                          | NA  |
| Ca-II-SNP1297 | 159.89                 | Ca-desi-LG(Chr)7 | 4955329                 | TTAATTAGGTCTCCATCTTTTGGCTTCACTTGCTTGGCTTTTAGTTAATTAATGAATTTTGGAGTAAATGAGGTAATAATTATGATTTTGGAG         | A         | G       | ACAAAGACTTATCAACTCTCAATTTATTTTAAATAAAGCTAACAAAACCAAAAATTTAATCAAGAAATCCACATGAAAATCATGTAATGATCTCATTTA | NA                         | NA                          | NA  |
| Ca-II-SNP1298 | 160.79                 | Ca-desi-LG(Chr)7 | 4960519                 | CTATTGAATTTACTTATTTCCAATTTCAAAAATTTATGCAAATTTTCAAGTATATCTGACCAGAAGCTAAATTTGATTTGTGCTGTTTTCCCATGGTTG   | T         | G       | CCAACCTTGTGGAGTCGATCAATGCAGTATTAAAGGCTCGCACAACTTCTCATCACTGCTTTGGTCCAATCAACTTATTTTAAACAGGGACACAATTT  | NA                         | NA                          | NA  |
| Ca-II-SNP1299 | 161.69                 | Ca-desi-LG(Chr)7 | 4991975                 | AAAATATTTGTTTCAATCGATTTGCCAATCGATTGTGTTTAAACAGGAGCTTAGCTAATTTTATGTTAATCGGAGTGCCAATCGATTTGGTAGATTTT    | T         | C       | ATCGATTGGACAATCTATTGTGAGAATTTCAATCATGTTAAGTTTGGTATCAATCGATTGGGAAATCGATTAACATAACAATTGGTAAGAATTTTCAAG | NA                         | NA                          | NA  |
| Ca-II-SNP1300 | 162.59                 | Ca-desi-LG(Chr)7 | 5014988                 | GTTTCGGAGGATCCTGGTGTGCTGTTGGAAATTTGGAGGCAGTTGCTGCTGGGAGTATTGAGAGTAATTTTGTGCTGCTGGAATAGTGGTTGTTGA      | T         | G       | CAACAACAGCAGTTTCAACAGCAACAACAATTTCAACAACAACAATTTTCAATTTCTCTGTGTTTTCATCAGCAGTTCCCGCTCGACCTCAATACTTGC | NA                         | NA                          | NA  |

| Marker IDs    | Genetic positions (cM) | Chromosomes      | Physical positions (bp) | Flanking sequences/Forward primers                                                                            | ICC 12968 | ICC4958 | Flanking sequences/Reverse primers                                                                             | Annealing temperature (0C) | Amplified Product size (bp) |    |
|---------------|------------------------|------------------|-------------------------|---------------------------------------------------------------------------------------------------------------|-----------|---------|----------------------------------------------------------------------------------------------------------------|----------------------------|-----------------------------|----|
| Ca-II-SNP1301 | 163.49                 | Ca-desi-LG(Chr)7 | 5019768                 | AATGAAAGTCCTGAAGGTAACAGGAGGATTTTT<br>GGCCTTGTTGATTTGCGAATACTAGGTGGTTAAA<br>AGGCTCTTCATGTGCATAATTATTTTCATC     | G         | A       | TTGGCACTTTTAATTTCTCTTGAACTATAAA<br>ACTAGATTTTGTCCATAGTAAATTGAGTAATCT<br>AATTTGAATGATTAATGTCATGCCTACTTG         | NA                         | NA                          | NA |
| Ca-II-SNP1302 | 164.39                 | Ca-desi-LG(Chr)7 | 5068949                 | TCCCTATCAATGCAGTCATAAGCTTTGTTGATATC<br>CAGTTTCAATGCGACGTCACTACTACCATGG<br>GTCTTACTTTTCATGTAATGAACAATTTCAA     | G         | T       | CTTCAACAGGTTAAACATGTTCTACATAAAT<br>GTATATCTAATTAACCAATCACTTTGTACCTA<br>ATAGGTTTCATCCTTGACAATGCAATGGCAGCC       | NA                         | NA                          | NA |
| Ca-II-SNP1303 | 165.29                 | Ca-desi-LG(Chr)7 | 5130849                 | TCCTTTAAGAGTTCATCCTCTTGTCTGTATATCCT<br>CCAATTTGAAGACTTGATGGATTTAGTCATATTT<br>TCTCCTCTTATCTTAATGATGAGTAAC      | C         | G       | TCTCTCAAATGGTTTTAATAACAAAATTG<br>TTTAAAGATTATGATTGTGGTTAATGACTAATA<br>TGCGCTTTTGAGTGAATTCATATTAGAAAACA         | NA                         | NA                          | NA |
| Ca-II-SNP1304 | 166.19                 | Ca-desi-LG(Chr)7 | 5164973                 | CTCTATTTGTTATTTTCTAATATTTGGTATCATA<br>GCTTTTGATTCGGTCTAAGTAATAAGAGTTCTTAG<br>TATGTTATGTGGTTGATGTTTGTCTGAT     | A         | C       | AGATGAGTCAAAATGACCACTTAATAACTAAAT<br>ATGTCCTTACCTAGAAGCTGTCTAAACAACAC<br>TTTTACAATATAACATTTCTTTCTTGATGTGGAA    | NA                         | NA                          | NA |
| Ca-II-SNP1305 | 167.09                 | Ca-desi-LG(Chr)7 | 5167898                 | TATAATTTAGCAACCTATAGAATTTGCCGTGAAATT<br>ATTTATATCAAGATTGTATGTCGTCTGATTTTATGA<br>ATATTATGTTGATTGTTACTTTGTGAATG | G         | A       | CACTACTCACAATATCAATCAAAAAATAAAAGA<br>TCAAACAATATCATTTCAAGTATATCACAATT<br>TCATTCAAGTAGCAAGAACTCCAGTACATA        | NA                         | NA                          | NA |
| Ca-II-SNP1306 | 169.79                 | Ca-desi-LG(Chr)7 | 5206401                 | TGACTGCATTTCTTCATTCATAGCTGTCATCCAAG<br>TTTCCTTGTCATTATTGTTAATTGCTTTCATGTAAT<br>TGTTTGGTTCAACTATTGCAAGATCTTCA  | A         | G       | TCTATATTTGTTGTTTTTCATTTTCATTTTATT<br>TTCTATATCAAGCCTCCAATCAGATATGGGCAA<br>GCATATTTTAATTTGTTATGCTTTAAGTGTG      | NA                         | NA                          | NA |
| Ca-II-SNP1307 | 170.69                 | Ca-desi-LG(Chr)7 | 5244567                 | TATGTGCCCGGTACACCTTCGTAACCTCAAATA<br>TCCGAATTTGTTGAAGTATACCTAATGCGATATTC<br>CAACCACCCCATGAATTCGTTATTCCTAAA    | T         | C       | GTCTTATTAGTCTAGGATTGATTCCATTTGATC<br>CTTCTAACCAGTTTCGATCTTGATCCAATGTGG<br>AGATAAGGTGTTCGTTATACCCTTCATGACT<br>C | NA                         | NA                          | NA |
| Ca-II-SNP1308 | 171.59                 | Ca-desi-LG(Chr)7 | 5257100                 | TTCTTTACTCGTTTAAAAAATCGCTCGTATTTTT<br>GATCTGTTAACTATACCTTTCATTAGTCAAATGGTC<br>TTGTCAGTTAGTTTTTGACAAAAAAC      | A         | G       | TATTTGATGAATTTTTAGGTTTTTATGATTGTAG<br>GAGATTATAACTTAATAAGTTTATGAATTTGAAG<br>ATGAGTGCATGAAAGAAATGACAAAACTTAA    | NA                         | NA                          | NA |

| Marker IDs    | Genetic positions (cM) | Chromosomes      | Physical positions (bp) | Flanking sequences/Forward primers                                                                           | ICC 12968 | ICC4958 | Flanking sequences/Reverse primers                                                                                                                                             | Annealing temperature (0C) | Amplified Product size (bp) |    |
|---------------|------------------------|------------------|-------------------------|--------------------------------------------------------------------------------------------------------------|-----------|---------|--------------------------------------------------------------------------------------------------------------------------------------------------------------------------------|----------------------------|-----------------------------|----|
| Ca-II-SNP1309 | 172.49                 | Ca-desi-LG(Chr)7 | 5451631                 | TTCCGGCTGCCTTTCTAGCAACCAGCCACAATGCTA<br>CAACCGGCCTCAAAGCACCACCTTCGCTGTGTG<br>TTTTCCAGTGACTTTTTTCTTTCTTTCAA   | C         | A       | GATGCGCACTAGAAAAGAGGCTGTTGGTGTGG<br>GCACAGCTGTAACAGAGTAAAATAAAAAATAAA<br>TAAAAACTGACATTTGGTGCGAAACACAGTT<br>GT                                                                 | NA                         | NA                          | NA |
| Ca-II-SNP1310 | 176.09                 | Ca-desi-LG(Chr)7 | 5534873                 | TCTTCAATCTGTGTTTATCTTCAATCGATTATCT<br>TACGGTTCAACAATTTACAATTTATGATTACAATT<br>TTGTTATTCAAATCATCGATTAGATT      | T         | C       | CCTGAGCTTGAAGATGAGAACTCCATTTTAT<br>TTTTTGCTTTTTCATTATCCTTTCTCTGAAAATT<br>AATCCCTAAATCGCTGAATCTGAATCTGAATTT                                                                     | NA                         | NA                          | NA |
| Ca-II-SNP1311 | 176.99                 | Ca-desi-LG(Chr)7 | 5605819                 | CGCTCTCTCAGAAGCAAATCAAGCCCTCTCTATCA<br>CCCCCAAGGATCCTTCGGTCCACATTTCTCGGGC<br>CCGAGCCCTTTACATAGCGGGTCACCGCGCC | A         | G       | TTCATCTCAGCCCTAAACACCAACGCGTCGGC<br>ACGCTCTGTGGATTGAGAACTTCGCGCGCG<br>GAAGAGATAGAGCGGAATCGAGGGATCTGATG<br>GCAG                                                                 | NA                         | NA                          | NA |
| Ca-II-SNP1312 | 177.89                 | Ca-desi-LG(Chr)7 | 5624378                 | CCATCAAATTTTTCTGCGAACAACATCGTCATCTA<br>CAGATCAGGTCTATGTCTGAAAGCGCGTCGCCAA<br>AAGTTGTCACACGCACTCTCATGCGCTGCTA | A         | C       | GAGATTCTGCACACAATGGAAGTGGTTGTGTC<br>GGAAAACCTTTCCAGCAGCGACGACAGACAGC<br>AGCAGACGGCGGTGGCAGATCTACTTGATGA<br>GAGA                                                                | NA                         | NA                          | NA |
| Ca-II-SNP1313 | 178.79                 | Ca-desi-LG(Chr)7 | 5627374                 | AAAATCTTCTACGGATCTTAAATGTTTAGCCATTT<br>ATGCTCCCGCACATCCCGAATTTCCCAAGAAAT<br>CATAGTCATGGTTTGTCTTGGTGAGGGAGC   | A         | G       | ATCCTATACTTGTACTGCTGCTATTATCAACAA<br>GATGTGTCTCTCAACACATCGTCAAGAAGACA<br>TTCAATACAAGAATCAAATACAAATATCCACTTC                                                                    | NA                         | NA                          | NA |
| Ca-II-SNP1314 | 181.49                 | Ca-desi-LG(Chr)7 | 5659652                 | TGGATTAATATTTAGATATTTTTCATCTTCTAGG<br>CTTATTCTAATCCATTTAAGTTTTAACAATCTTG<br>TGCATCCAATAAGTGTGTTTGTGTCAAT     | G         | A       | CAATGACACAAAAACTTATTGGATGCACAAG<br>ATTGGTTAAAAAACCTAAATAGATTAGAATAAGC<br>CTAGGGAGGACGAAAATGACCTAAATATTAATC                                                                     | NA                         | NA                          | NA |
| Ca-II-SNP1315 | 182.39                 | Ca-desi-LG(Chr)7 | 5712266                 | CCTCTAATGTAAGTCTAAGGATGTCCATGGA<br>TGGTCATAAGTCTTTGAGAGATGGTTGATGTCTT<br>TCTTTCTAATATGTACTATTGGAATTTGG       | T         | C       | TTCTCATCAATAATAGATCAAGAGAATAATAAGA<br>ATCTCTTTTATAAATCATATTCTAGAAAGTTACC<br>TAACAAGTAAAAAATGTGTCAACATGTTTAC                                                                    | NA                         | NA                          | NA |
| Ca-II-SNP1316 | 183.29                 | Ca-desi-LG(Chr)7 | 5722546                 | CAAGGGCTTCGTGGGTCTTCCAAGCAACACCAC<br>TAACTCGAGCTTCGTGGGTCTTCCAAGCAACAC<br>CACTAACTCAAATCCCGCAAGGATCTGTGG     | T         | C       | TTTTCAAAAGAAAGTTATCTATATGTGTGTGGC<br>AACATGTGTGACAATACAGTACCTACTGATCCT<br>AATCAGATGGTTGAAAGAAGCCCAAGAAAATTG<br>TATATGCCACAGATTTTTCACATTTTACAGCA<br>AAATTCATTAGCAGAGAAAGCTTTTAA | NA                         | NA                          | NA |

| Marker IDs    | Genetic positions (cM) | Chromosomes      | Physical positions (bp) | Flanking sequences/Forward primers                                                                          | ICC 12968 | ICC4958 | Flanking sequences/Reverse primers                                                                              | Annealing temperature (0C) | Amplified Product size (bp) |    |
|---------------|------------------------|------------------|-------------------------|-------------------------------------------------------------------------------------------------------------|-----------|---------|-----------------------------------------------------------------------------------------------------------------|----------------------------|-----------------------------|----|
| Ca-II-SNP1317 | 184.19                 | Ca-desi-LG(Chr)7 | 5799441                 | ATACCTATACCATTATTTTTAAAAATACCAATTA<br>TACCCTTAATTTTTAAATTATTTTATTAATCAAT<br>TTTTTTTTATTCATTCATCTTTCTG       | A         | G       | GCCTGGTATTTGAGATAAATATTCTCTACAAA<br>GTCCCCTATTAAATTGAAAAAGTTTTTCGAAAA<br>TAAATGTGACTGAAAATCTTTTTGTAGTT          | NA                         | NA                          | NA |
| Ca-II-SNP1318 | 185.09                 | Ca-desi-LG(Chr)7 | 5805369                 | ATAAAGCACAGTTGTCAGTACACTTTGACTTTTG<br>GTTCCAGGCCAACCGTACCATACTTATACTTATC<br>ATCGTCAGCTTCGTTTTGAAGTTGGAAGAA  | C         | T       | CGAAGCATAACGAGTTAGATTATTATTAGGAAA<br>CAGTAATTAATAATGCATAGCATAGGATACA<br>TACCATTGACTTGCCGGAGCCAAGTCCGTGC<br>TC   | NA                         | NA                          | NA |
| Ca-II-SNP1319 | 185.99                 | Ca-desi-LG(Chr)7 | 5859634                 | TAGATTTGTCATTTATTTATTTGATGGTCTTTGT<br>TATAAATATGTTATTAATTTGATTTACGTATGAGT<br>TAAAAGTATTTAAATATTGAATTGTTAT   | G         | A       | ACGTCGTTAACGATTTAATAATTATAACAATAT<br>TTCCCAAAACACGTATTTAAATCATCTCTCATT<br>TCATCGTAATTCATGGAAAACATATTCAATCG      | NA                         | NA                          | NA |
| Ca-II-SNP1320 | 186.89                 | Ca-desi-LG(Chr)7 | 5865212                 | CCTTCCCTGTCTTCATTTGGCCCTTATCAAACAT<br>ATGAATGCTGGCTCCTCTTAAAAACAGAGTTCTC<br>TGATGTATCTGAATAAATTTGAATCAAATC  | A         | C       | TTGTGCTGACTGTCATCCAAACATTGTTTCGAT<br>GGCATGGGGTGGAGCATGATCAAGATTTTATTT<br>ACCTTGCACTGGAACGTTGACTTGCAACTTAG<br>A | NA                         | NA                          | NA |
| Ca-II-SNP1321 | 187.79                 | Ca-desi-LG(Chr)7 | 5880777                 | AGCTGGGTAAATATTAATTTTTGTTGCTTCTGGA<br>TGCAGGCTGCAAGGATATTGATGATGCACTCCAC<br>TGCTACGCTCTTCCAAATGGAACCTTTGAAG | T         | C       | TGCCACTTTAATCCACACACACACAATAATA<br>TATATAGATTATCGATACATGATCATTAATA<br>ATAGAAATCCTTAGACCAAGGATACGAACTCCA         | NA                         | NA                          | NA |
| Ca-II-SNP1322 | 188.69                 | Ca-desi-LG(Chr)7 | 5885422                 | CTAGACTGTGTATGTCTAATCTGATAATTGTTTT<br>TTGGTTCTTGCGTAGCGTCATCCAACCTCAACC<br>AGAGAGATGCTTGAACCTTGCTACGTGTTG   | C         | A       | AAAAAGAAAAATAGAATAAATATTTACCACA<br>GCATGGTCAAGAGAATCAGCCAATGCTTTTGAC<br>GAGGAAACATCCAAGTTCAGGCCAAGTGCAGC<br>A   | NA                         | NA                          | NA |
| Ca-II-SNP1323 | 189.59                 | Ca-desi-LG(Chr)7 | 6099337                 | GTCAATCCAACCCCATGTGAAAAGTCGGAAGCCG<br>CCTGCCAACTCAGAGTTATAGACCTTTACTAAC<br>TTCCCTTTGGCTGAAGTCTAACTTTTGTGA   | A         | G       | TTCCCTTGCTCTTTTTCACTAGTTGGTTTTTCC<br>CTAATTGTTCTCGATATACCACAACCTACAGA<br>ACATTTATTTGTAGCCACATAAACATTAACATG      | NA                         | NA                          | NA |
| Ca-II-SNP1324 | 190.49                 | Ca-desi-LG(Chr)7 | 6148005                 | CTGGTATGCTCTCCAAAACATACTTTATCTTAAA<br>GAAAACCTGAATTTCTCAATGTTCTTCCCTTAGT<br>CTCAGGTACCCACATTGATGTAATGCAAC   | G         | A       | CATGATTCATGCATCTCTGTATAATTGTCAATA<br>TAATGCTGACATTGTTTCATTGTCTATAGGGAC<br>ATTACAATCTACACAATCGTAGCCGCTTTCAC      | NA                         | NA                          | NA |



| Marker IDs    | Genetic positions (cM) | Chromosomes      | Physical positions (bp) | Flanking sequences/Forward primers                                                                    | ICC 12968 | ICC4958 | Flanking sequences/Reverse primers                                                                    | Annealing temperature (0C) | Amplified Product size (bp) |    |
|---------------|------------------------|------------------|-------------------------|-------------------------------------------------------------------------------------------------------|-----------|---------|-------------------------------------------------------------------------------------------------------|----------------------------|-----------------------------|----|
| Ca-II-SNP1325 | 191.39                 | Ca-desi-LG(Chr)7 | 6192916                 | TTCATCATCTTCTTCATCATCATTGTCCTCTTCTCTTGGGGTTTGAAGAGGCAGGGGCAACACCTCCTGAACATCATCGTCATCATCAACTTCC        | T         | A       | TATCTTGTTCAGCCAATTGGACAGCCCGAGACTCGCAATGGTGGGGGTGCTGACATTGATGATGGGAAAACCTGGATGATGAAGAGGAGGAAGAGGAGG   | NA                         | NA                          | NA |
| Ca-II-SNP1326 | 192.29                 | Ca-desi-LG(Chr)7 | 6202937                 | TGGCATTTTCTTTTTGTGGGTGCTTCTTTTTCATTAAAGACTAAATCATAACAAGTGTGGTTATATGACTTCTATTTTTAGGAAATTTTATACAA       | T         | A       | TGTTAAATCTTTTGTGTTAAATAGGAATTAATATTAACAAGTTGGTTTTGATATTAATTCATCAC TTAGGAAAGAATTAGATAATCTTGTGATAAT     | NA                         | NA                          | NA |
| Ca-II-SNP1327 | 193.19                 | Ca-desi-LG(Chr)7 | 6248248                 | TTTTCACTAGTGAATAATTTTTTAAAACATTTTTCCAATGTTCTTTCTTTTCAAAATTAATCTTAAAGTCATTTTATCAATAATTTGACCCTTTTT      | C         | A       | AAGAGCTTGACATAGAGATTAGTGAGAGACATAGAGGCATGAGATAAGCATGGATCATGTTAAAAATATGACAACCTTGGTATGAGTTGTGCAAGGC T   | NA                         | NA                          | NA |
| Ca-II-SNP1328 | 194.09                 | Ca-desi-LG(Chr)7 | 6283725                 | TTCTGCTCTTGGATTCCCCTTTTTCTCAGATCAGTTGCTGAACTCATCTATAAATAGAGAGCTCACCTCACTTGGAAAAGCACACCAAAGCTCTC       | T         | C       | AGTCGATTGACTGACACTCAAATATAGCACGGA GGCTACTCAAGAAAATAAGAAAGAAGAAGAA TATAAGGGGGAAGTGAGAAAAGCCTCAGAC AC   | NA                         | NA                          | NA |
| Ca-II-SNP1329 | 194.99                 | Ca-desi-LG(Chr)7 | 6286042                 | TCGATGGATCTCATTACCAATAATGGGAGCTTTGTTTGGTGGGTTGATTCATAATCAACATGGTAAATTTGTGTATGCTTTTATGCGTAAATTTAC      | C         | T       | TCATATTCATTAACACATGTTGCATGATTGAGATTGAACAACCTGGAGGTCTGTGAGGATTGTCCATAAATCAATTGAGTTGCAAGAGTATTTGAAGA    | NA                         | NA                          | NA |
| Ca-II-SNP1330 | 195.89                 | Ca-desi-LG(Chr)7 | 6405935                 | GAGCCATCAATATAGGTTAAACACCATTAAATGTTCTTCTTATAACTTCCATAGGGGGTTAATCCATTCGTTTTTATTAGGGTTAATCAAGTTCTACTT   | C         | T       | TACCGCCACACCAAAGTACAAGATAAAGAGTGATTGTGGCATTGCAATTTCTAACCAAGTTGACTTTATTCATAACTCTTTGATCAAGAGTAAGGTTTT   | NA                         | NA                          | NA |
| Ca-II-SNP1331 | 196.79                 | Ca-desi-LG(Chr)7 | 6426365                 | GAGTTTTGTGGTGCATTGTCTATTATCTAGCTCTTG TAAAAATTTTAGGAGTTAGAGTTTATAATGTTAC AAGTTGCATTTAGACAAGCAAGGCATGAT | C         | T       | GTTTCATTTAATTTTTTTCATCATCTACAAAAATATATGGATAAAATAGTCTCCATCTTCTCCATTATAATTTCAAGACTCATAACCACGAGTTCTTGCTT | NA                         | NA                          | NA |
| Ca-II-SSR379  | 197.69                 | Ca-desi-LG(Chr)7 | 6459484                 | CATTTTCGTCTCAACCATTCA                                                                                 | (AT)12    | (AT)11  | TGGAGACGAGGAGCATACCT                                                                                  | 58.61                      | 134.00                      | NA |

| Marker IDs    | Genetic positions (cM) | Chromosomes      | Physical positions (bp) | Flanking sequences/Forward primers                                                                           | ICC 12968 | ICC4958 | Flanking sequences/Reverse primers                                                                                                                                                                                                                                                                                                   | Annealing temperature (0C) | Amplified Product size (bp) |    |
|---------------|------------------------|------------------|-------------------------|--------------------------------------------------------------------------------------------------------------|-----------|---------|--------------------------------------------------------------------------------------------------------------------------------------------------------------------------------------------------------------------------------------------------------------------------------------------------------------------------------------|----------------------------|-----------------------------|----|
| Ca-II-SNP1332 | 199.49                 | Ca-desi-LG(Chr)7 | 6475773                 | AAAAAGTTTTACCGGAAATTTCAATCCTCTTGAA<br>ATTTCCGGTACACTGTGTAATTTTTTTTTAATTTT<br>GTTTATTGAATTTGTTAGTGAGGACCA     | A         | G       | TTCTCTATTCTCTTTCTCCTTTTTTCAACAGCA<br>GCTCTCCTATTTGATTGTGTAGGAGGCCGAAC<br>CGGAATAATCACCACCGTCAGATTTTCTCCT                                                                                                                                                                                                                             | NA                         | NA                          | NA |
| Ca-II-SNP1333 | 200.39                 | Ca-desi-LG(Chr)7 | 6530072                 | GAATTCCTCCACTGCATCTCAACAGAGACCAGTTG<br>TTGATTGGTGGGCTGAAGATCTAACAGTTCTCAGA<br>ATTGACATTTTTCAAGAGTTCTAGTTGCA  | T         | A       | CCTTGATAGTAAAGGATCTTACCAAACCTCTG<br>AGAGATTTCTGTGAATAAAGCATTATAATAGGA<br>CCAATACCACACTGTTTAAACCCTCTTGCCATC<br>A                                                                                                                                                                                                                      | NA                         | NA                          | NA |
| Ca-II-SNP1334 | 201.29                 | Ca-desi-LG(Chr)7 | 6565557                 | TCTTAGCATTAGATATGATGCCATTATAGTTGG<br>TGATATACTGATTTATCAATTTGTGTACGGCTATT<br>GTGTTTGATGTCTAGCGATGTTCAATTTGA   | G         | T       | AAATTATGCATATTTGGTACTACAATCTCATCAT<br>TTTTTTTCTCCACTCTGCCAAAAGTTTCAAATAA<br>TGGTTCGATTTAATCTTATACTAGTTTTTTCCT<br>CTCATTAAATTTGTGTCTTATTCATATCTTACT<br>TTAGCTCAACTTAGTACAAACCTTATGCTAAAA<br>CTTGCCCAATGTTGAAAGCATTGTTAGAACAG<br>CAGTTCAAAACAAATTCAAACAACTTTTGTTC<br>TCTTCTCTACACTTCCCTCTCTTTTCAACA                                    | NA                         | NA                          | NA |
| Ca-II-SNP1335 | 202.19                 | Ca-desi-LG(Chr)7 | 6598127                 | ACAAAAGGCAAGTTACCTCCTCTATTTACAGTTCA<br>TAACAATACTCCATGACCTTCTTTGTTACAGGCCCT<br>TTTGTTCCTCCTGAACCTGAAGATTTTGA | T         | C       | TATTATGCTATGCCAGTGATAGCAATTTCTTGC<br>CCATTTTGAACATGATGGTTTATTATTTTTTTT<br>TTCTTCTCTGAATGGTTGAGGATAATGATGG                                                                                                                                                                                                                            | NA                         | NA                          | NA |
| Ca-II-SNP1336 | 203.09                 | Ca-desi-LG(Chr)7 | 6627339                 | CTTCGGGCTCTGATCTGACATTTGGCTTTAGCTG<br>TTGTTTCATCACCTTCCAGTTAATACTGCATATGC<br>CCTTCTTACCATAAAGTGGTAATATGAAC   | C         | T       | TGTGTCGAGTTCTACTACTTTCTGCCTTGA<br>ACTGGATTGAAGTATGGATGGGCTGCGTAGT<br>ATTTAAGATTTGTTAACCAAAACATTCTATAAAAT<br>G                                                                                                                                                                                                                        | NA                         | NA                          | NA |
| Ca-II-SNP1337 | 203.99                 | Ca-desi-LG(Chr)7 | 6722262                 | ATCGCACTTTTCTCTATTTGATAAAACTCTGGCAT<br>ACCGATCTATTCCGAATTTTTATGACCCTTTACA<br>ATGGAAAAAATCTCTTTAAGACCTTTTC    | C         | A       | AGATTTTAGGAACCTCATAATGATTTTGTGATTT<br>ATGATGGTACTATTTGATACAAGAAATTTAGAT<br>GCTCTTGATTTCTAAAATGATTGATTTTAGTTA                                                                                                                                                                                                                         | NA                         | NA                          | NA |
| Ca-II-SNP1338 | 204.89                 | Ca-desi-LG(Chr)7 | 6729740                 | ATTGACACACACTGTTTTTATACTGGTTACCCAA<br>AGATGGCTACTTCCAGTCCCTCACACCCTTGTGAG<br>ATTTCACTAATGTTCAAACAGATCAACCTCT | T         | C       | CCCACCCTCCTTTTCCCTTAAAACTCAACTC<br>CTAGTCATATCCTAAAACAACCTTGCAATATCTAA<br>CCACAATCGAGTTCCAGAGTGAACAAAGTCTTA<br>TCCTCCTCTCTATTTCCCTTCCATGCTTCCAATA<br>TTTGATATGCCGAAGGCTTGTCAATCACTCCAT<br>CGTCAACATCATCTTTCATAGCTTTTCATCATC<br>TGAGAGCTCATCCGAACCATCCGAAGACTT<br>CTCAACTCCCACTCATGACAAAAATTCACCTT<br>GTAATTTACTCACAACAACACCCCAAAATCT | NA                         | NA                          | NA |
| Ca-II-SNP1339 | 205.79                 | Ca-desi-LG(Chr)7 | 6747829                 | TAATTATCTCCATTTGTTGATTCCTTTAGATGATA<br>GTGTTGAATAATGTCCTTAATTTATGATATCATG<br>TGTCTAGTTTTTCATTTGAGTATCTCTAA   | C         | T       | ACATTTGTCGTGAAGATGGATTTCTCACTGATC<br>ATCAATGCAGTGCACCGTACTTCTGCTCTTGAA<br>ACTAAATGATCACTCAATCTTCTGCCAAGATAG<br>TCAACCACAACATTACCTAGCATCAGCTTT                                                                                                                                                                                        | NA                         | NA                          | NA |

| Marker IDs    | Genetic positions (cM) | Chromosomes      | Physical positions (bp) | Flanking sequences/Forward primers                                                                         | ICC 12968 | ICC4958 | Flanking sequences/Reverse primers                                                                                                                                                                                                                                                          | Annealing temperature (0C) | Amplified Product size (bp) |     |
|---------------|------------------------|------------------|-------------------------|------------------------------------------------------------------------------------------------------------|-----------|---------|---------------------------------------------------------------------------------------------------------------------------------------------------------------------------------------------------------------------------------------------------------------------------------------------|----------------------------|-----------------------------|-----|
| Ca-II-SNP1340 | 206.61                 | Ca-desi-LG(Chr)7 | 6769512                 | CCAGTAAATTCTCTCAATCTTGTCCCGGATGAT<br>GAATCACAAACCGTCGCGCCTCCGAGCTTGGCA<br>ATTCCCATTTTTCTTGATGGTAGAGTTTGA   | G         | A       | TTTAATTTGCACTACTCTCTTCCATTATCTAT<br>CTTTTTCCCTTCTATTCTATCTTATGTCAGAATAA<br>CACAGTTTCAGCAAGTTATTTTTAATTGCCA                                                                                                                                                                                  | NA                         | NA                          | NA  |
| Ca-II-SNP1341 | 207.43                 | Ca-desi-LG(Chr)7 | 6786915                 | CTGTAACCTATTTTTGATTAATTAGATTTTTTAAT<br>GACTTTAGTTTTAGTTAGAATTTGTGTTTTCTTAT<br>CTTGTTGTGTTTAGGTTAAATAATGCA  | C         | T       | GTGTGATCAAATTGAGAACTCCAACATTAATA<br>ATCAAATTGAGAGACTCAATCTCAAATTATTACA<br>ATAACACAAGAATAGCAACAATCATTCCATAT                                                                                                                                                                                  | NA                         | NA                          | NA  |
| Ca-II-SNP1342 | 208.25                 | Ca-desi-LG(Chr)7 | 7087458                 | TTTTCTTCTTTTATCTTCATCTTTTCCCTTGATT<br>GATCTCTCTTTAGGAACCTGCAATTTCTTTTTATGT<br>GACCCGTTTTGCCACAATGATAGCATAT | G         | C       | AGTGTTCAGTACCTCGTGGGGTGACAAGGAAG<br>GAATTATGGGCATACAAGGAAGCCAAGTCACTT<br>GGTGTGGGAAGCTTTCGACATTAGATGAACT<br>GATTTTTGACAGCCAGCAGTATTGGGATGCATT<br>TGTGCTTTTATAGATGCTTGAAGAATATGG<br>TACCCATTT                                                                                                | NA                         | NA                          | NA  |
| Ca-II-SSR380  | 209.07                 | Ca-desi-LG(Chr)7 | 7091911                 | ACCCCGTATTTCTTTTGCC                                                                                        | (TG)6     | (TG)8   | ATAGGACCAGCAGCACAAAGG                                                                                                                                                                                                                                                                       | 60.18                      | 187.00                      | NA  |
| Ca-II-SNP1343 | 211.53                 | Ca-desi-LG(Chr)7 | 7160146                 | TACAAATCTTACATCCTCCAATTTGTCAACTCG<br>CCAAAATCTGATGTGGCACATTCAAAATTCATCT<br>TCTATTCCAATATGTTTTATTCTTCAATA   | G         | A       | CAATTGCACAAGAGGGAAAGTGCAGACAAAA<br>CCTAGCAGCAGCTTGCAGTTGTACCCACCATG<br>AAACAGAGAAGTGCCACCTTCTATATCAATAGT<br>ATATCAAATGACGATAAGGAAGTACTTCCAAT<br>GTTGCCAACCCCTTGTGAGTTGGGGCTGATGCA<br>CCATGGGGCCATGGGTGTCTAGAAAAGAGAGC<br>ACACTAGTTACTATTATATACAGTGAATGATG<br>AATCCACACACTCTCAAGCAAGCCACAAAG | NA                         | NA                          | NA  |
| Ca-II-SSR381  | 213.17                 | Ca-desi-LG(Chr)7 | 7492313                 | TCCTTGGTGTCCAATCCTTT                                                                                       | (AT)9     | (AT)10  | GTCTGAGGCCGATGAGGTAA                                                                                                                                                                                                                                                                        | 59.38                      | 203.00                      | NA  |
| Ca-II-SSR382  | 130.37                 | Ca-desi-LG(Chr)7 | 7874736                 | TCTATAGCCGAAAATGACAAACT                                                                                    | (TAA)5    | (TAA)7  | GGGTTTACCGTGCATCACTC                                                                                                                                                                                                                                                                        | 57.21                      | 146.00                      | NA  |
| Ca-II-SNP1344 | 213.99                 | Ca-desi-LG(Chr)7 | 8206701                 | ATTATGATGAAACATTTGCTCCGGTAGCCAAAATG<br>ACAATTGTCGACTGTACTCTATAGTTGCTTC<br>TAATGGGTGGACTCTTTATCAAATGGATGT   | C         | T       | GTGTGAGTTGAATGTTTTAAGTTGCTTGTGAGA<br>AAAAAGTTGGACTATCTTACTTTATGCAGTTCAT<br>AACAATTTTGTATTGGGTTTGATTAAAGCAGA<br>ACTTTGCAGGCATTGATGTGAATAATATGTGAC<br>CTCTAAA                                                                                                                                 | NA                         | NA                          | 111 |

| Marker IDs    | Genetic positions (cM) | Chromosomes      | Physical positions (bp) | Flanking sequences/Forward primers                                                                           | ICC 12968 | ICC4958 | Flanking sequences/Reverse primers                                                                                                                                                                                                                                                              | Annealing temperature (0C) | Amplified Product size (bp) |    |
|---------------|------------------------|------------------|-------------------------|--------------------------------------------------------------------------------------------------------------|-----------|---------|-------------------------------------------------------------------------------------------------------------------------------------------------------------------------------------------------------------------------------------------------------------------------------------------------|----------------------------|-----------------------------|----|
| Ca-II-SNP1345 | 0.00                   | Ca-desi-LG(Chr)8 | 42890                   | ACGATCTTGTTACCGCCTTTCGTGTCTAGAATATG<br>AACGTCGACATTTTATCGGCGGTGCCGGAGAAT<br>ACCATAACTCCGTCGTTCCGCCCTAAAAACCT | C         | T       | TTCTGAAATCACTGGATTGTAATAATTA<br>ATGGGTAATGTAACGGGAACAGTGGCCGCGAA<br>ATTCCGCTTTTCCCGCCAGAACCACCCACATA<br>C                                                                                                                                                                                       | NA                         | NA                          | NA |
| Ca-II-SNP1346 | 0.85                   | Ca-desi-LG(Chr)8 | 99835                   | TTACCTGAACAACATAAGTAACAGCACATGAATTA<br>TCTTGAAGCTTCTCTACTACCCATCTGATTGTAG<br>CAATAGTCTCTTATTGCATTATTTTGCTT   | C         | A       | TGTTTCAAAGTCCACATGATGAAGTCCAAACCT<br>TATACTGTATCCATGATCCACTCAAAGTTATCT<br>AGAAGGGACCACAGAAAGTACCCCTCACATC<br>TGCTCCTTTCCTTATTGCTGTTGCTAGAGAATC<br>CAAGTATCCACTCAAATATCCACTCTTTTGACA<br>TCGTTCAATACATCTTACTTGTGGGTAGGAA<br>TTCTCAGTATCCCAAATCCATTTTCAGTGATG<br>AAATTCCTATCTTCTTCTATCTCTCTTTATCT  | NA                         | NA                          | NA |
| Ca-II-SNP1347 | 3.52                   | Ca-desi-LG(Chr)8 | 131020                  | AAACATGGGAAGTGAATTTGCCTGTTGAGGAAGT<br>GCCTCCTGAACTTCCGGAGCCAGCATTAGGTATA<br>AACTTTGCTAGGGATGGCATGCAGGAGAAGGA | A         | G       | GAAGCACAAACAGTGTGCCAAATATGTTGATCT<br>CAAGAAGTGGGATGCTCAATTTGTGGATGTCG<br>ACCGTGAAACTCTGTTTGTCTTCAAACCTCTG<br>CAGGGTACATGAGAATTGATAGTCTGCTTAAGC<br>TGGCATGGGATAAAATAGATAGCATGATAAAG<br>ACAAGACACCAGAGGAAATTGCTCAGTTCTATG<br>TCAGTTGAATTTTGCCTGAAACTCATGTTACAG<br>CAACACACACAGCCACCATCTCTCAGATTTT | NA                         | NA                          | NA |
| Ca-II-SNP1348 | 4.41                   | Ca-desi-LG(Chr)8 | 156792                  | TAGAATCTATTCTCCTTTGTGCTTGTGGTGACCT<br>GATTTTATTTAATTCAGATTTTTGTGGCAATTTG<br>GATCCTAATGTCACAGATGATCATTGAG     | A         | G       | CTAACTGATTAATTTACCTGTCAGCAAATTTGGA<br>CAAATCCGCATCTCTTGCCTGCTGGAATCTTAA<br>CATGAACTAGCTCACCCTACTGCCAAAAAAGTT<br>G                                                                                                                                                                               | NA                         | NA                          | NA |
| Ca-II-SNP1349 | 5.30                   | Ca-desi-LG(Chr)8 | 218174                  | TACACTCATCAGAGGATCAGCTTCGTGTGCATAAG<br>AAGCAGACCTCGTTCCTAACACAGTTGACAGCAAA<br>AACACTGCCTAAAGGTCTCCACTGTCTTCC | A         | G       | ATATTGCATAATGGTAAAGTCCAGGGTCTTCTA<br>ACTTCTCTTGATTGGGAATTGTTGCTGGGAAG<br>AATTCAAATTATAATATTCAGTTGTAAGGCGCAA                                                                                                                                                                                     | NA                         | NA                          | NA |
| Ca-II-SNP1350 | 6.19                   | Ca-desi-LG(Chr)8 | 219169                  | TTGATCCTCGTCTTGTGGATGGGCATATGGTAT<br>GAATGTTTTGATTAGTAGGATGGAAGAAGCAAA<br>ACATCACAGAGGTGTACCACAACCTGGCAGAA   | A         | T       | CAGCAATGGAATTTGAAAGAAACAAAGACACT<br>GCAGATGCTTTTCACTTAATTTATGTGATTTTT<br>GTTTTGGAAAAGTAAACCAAAGTGTGCTTACCA<br>G                                                                                                                                                                                 | NA                         | NA                          | NA |
| Ca-II-SNP1351 | 7.08                   | Ca-desi-LG(Chr)8 | 237547                  | CTTAGTCAAATATGTTTGATTACAAAATTTGTAG<br>AAGTGCATGACCTTCTAGCTTTTACCACCTAGTTGG<br>TTGTTGGTGAAGTACATGCAATCAACGAT  | C         | T       | TACTTGTAGAGAGAATCCACAACGACTGGT<br>TTACCTAAAATGAACTCCTTTTATAATGCATCA<br>TTTTTCTGATTGAATTACCCAAATGATGTTTG                                                                                                                                                                                         | NA                         | NA                          | NA |
| Ca-II-SNP1352 | 7.97                   | Ca-desi-LG(Chr)8 | 238144                  | ATGATGTATTTATACTAGTGCTTTTGCTCATGGCA<br>TTTGACAATGACAACATGACTCATAAATATATTTCT<br>ACACTTTGACCCGTTGAATGACATTTTGA | A         | G       | ATTTATGTATAATTATTATAAATATGTTTGTAA<br>GAAAATCAAATTTTACACAAAGGTAATAAAAAA<br>AATCAGTTGAAAAAACAAACATTGATGTAACA                                                                                                                                                                                      | NA                         | NA                          | NA |

| Marker IDs    | Genetic positions (cM) | Chromosomes      | Physical positions (bp) | Flanking sequences/Forward primers                                                                           | ICC 12968 | ICC4958 | Flanking sequences/Reverse primers                                                                               | Annealing temperature (0C) | Amplified Product size (bp) |    |
|---------------|------------------------|------------------|-------------------------|--------------------------------------------------------------------------------------------------------------|-----------|---------|------------------------------------------------------------------------------------------------------------------|----------------------------|-----------------------------|----|
| Ca-II-SNP1353 | 8.86                   | Ca-desi-LG(Chr)8 | 244409                  | TCTCATTAAATTAATTTCTCCCGGTACCATCTAT<br>CATACTACCCCTTATCCTTATTTGTGTTTCTACAAT<br>ATTTGATTTTGTTTTATTCTTAATTAAT   | G         | T       | ATGTTTATCAAGAAATGTAGTGCCCAATAGTA<br>GAAACTTTAACTCAATCGGTCTCATCTCATTGA<br>CTATCATTGTAATAGCCAAATACTGTATGTGTT<br>C  | NA                         | NA                          | NA |
| Ca-II-SNP1354 | 11.53                  | Ca-desi-LG(Chr)8 | 252008                  | TTACCTGAACAACATAAGTAACAGCACATGAATTA<br>TCTTGAAGCTTCTCTACTACCCATCCTGATTGTAG<br>CAATAGTCTCTTATTGCATTATTTTGCTT  | A         | C       | CGTGTTTTGAATCATGGCTTTAAGTTAACTG<br>AATGAATGAATTTGTAGGTAGTAGCAGTTGCTT<br>CATTGCCAAAGGAGATAGCTGCTGGATTACATC<br>C   | NA                         | NA                          | NA |
| Ca-II-SNP1355 | 12.42                  | Ca-desi-LG(Chr)8 | 307458                  | AAACATGGGAAGTGAATTTGCCTGTTGAGGAAGT<br>GCCTCCTGAACCTCCGGAGCCAGCATTAGGTATA<br>AACTTTGCTAGGGATGGCATGCAGGAGAAGGA | C         | T       | GTTCTTACCTTTTATTCTTACCAAATCCAAAGC<br>GGGCACCAAAGTAGAAAGCAACAGCTAGCAGC<br>CATGAGTCACTGTGAAGTGAACCCAGCGATAA<br>CCA | NA                         | NA                          | NA |
| Ca-II-SNP1356 | 13.31                  | Ca-desi-LG(Chr)8 | 392134                  | GTTTTCAAGGACTATATTGTCTGGGCTGACATTGC<br>ATTCTGGAACATAACATGATTCTTCGAGCATAGAT<br>CTGATTTTCTCATTTGATGTCATAATGTCC | C         | A       | GCTTGCATGGATGTGACTGATAGTATCACAAA<br>CCTGTTGATGTGAAGTTCAATGTGAGAAATTTCT<br>CATGCTGATAGATCAATTAGGAGAAAAAGATTT<br>G | NA                         | NA                          | NA |
| Ca-II-SNP1357 | 14.20                  | Ca-desi-LG(Chr)8 | 395111                  | GCACTCACTCACAAAGAGATAAAGCAAGCCAG<br>CAAGCTGCCTAGAACCATACGCTCAAAGCTTTT<br>CCTTCTTCCAAGGCCTCCCTATTGTATCCA      | G         | C       | AAGAACAATTTTGTGAATGTGTATAGTCTATC<br>CATGCATTTACTGTCTATATAACGATTGTAGGT<br>AGGTCTAGAAGGAAGTGCAATGGGCGAGTGGT<br>GG  | NA                         | NA                          | NA |
| Ca-II-SNP1358 | 15.09                  | Ca-desi-LG(Chr)8 | 396980                  | CCAACATCCATGTGCCAATCAAATTTCTGATATT<br>GTGTCGTCTGTATAAGTAAGTTCCCTTGAGGCCA<br>GCTCTGATCTTATTATGCTGTCAACAGGGC   | C         | A       | TGCTCATAATAGTCTGTGCTTAAATTTGGCTGT<br>TGGTAACGGTTCTGTGTATAGCTTGGCAACTCA<br>TGGTGGCATAACGCGATGGAATATTGCATCCC<br>CA | NA                         | NA                          | NA |
| Ca-II-SNP1359 | 15.98                  | Ca-desi-LG(Chr)8 | 397569                  | CTTGATCCTGCTGCACCGACGACATGTCAACTCG<br>ATTTTCTGGCTGACCGTCGATGTTAAATACTTTCA<br>AAAGGTCCTTTGAACGGGCATCCCTTTAAAA | T         | G       | TGGTATTCTATTTCAAACCTTCACTTTTCTGCTA<br>CTAGTTTGTAGTTAGTCTTTGTGTTTCTTCTACT<br>CCAACCTATATATAATAACTTGAATCCATC       | NA                         | NA                          | NA |
| Ca-II-SNP1360 | 16.87                  | Ca-desi-LG(Chr)8 | 406836                  | AGGGTTGTCCTAAGATGTTGGGTGTAACATCCTG<br>CTTTTTCGAGATATTATCTAACGAAATTTCAAACGT<br>AGAAATACAAATTTGTTTTTATTATTTA   | T         | A       | TTACTTTTGTAAATGTAATATTTGATTCATTA<br>TTTTTGAAATATAGCTAAAAATATTATTAGTTA<br>ATTTTAAGATAAATGAGTATTTAAGATAATC         | NA                         | NA                          | NA |

| Marker IDs    | Genetic positions (cM) | Chromosomes      | Physical positions (bp) | Flanking sequences/Forward primers                                                                          | ICC 12968 | ICC4958 | Flanking sequences/Reverse primers                                                                                                                                                                | Annealing temperature (0C) | Amplified Product size (bp) |     |
|---------------|------------------------|------------------|-------------------------|-------------------------------------------------------------------------------------------------------------|-----------|---------|---------------------------------------------------------------------------------------------------------------------------------------------------------------------------------------------------|----------------------------|-----------------------------|-----|
| Ca-II-SNP1361 | 17.76                  | Ca-desi-LG(Chr)8 | 509122                  | TGCGCGTCACGCGCCCCAGGCGCGCTTGACAG<br>AACTGAAACACGAGAAATGCGCTCCAGGCGCGTG<br>TTGACAGAACTGAAACACGAGAAATGCGCTCCA | A         | G       | ACTTTCATGAAGACACCGGGACCAAATTCAGAC<br>GCAAAAGATGAGAAAATGAAAATACATCAGA<br>CAGATGCTGTGCGCCTAGAGCGGCCCTGCG<br>CGC                                                                                     | NA                         | NA                          | NA  |
| Ca-II-SNP1362 | 18.65                  | Ca-desi-LG(Chr)8 | 513632                  | ACATAATTTTTCCATTTAGTTTCTGGATTTCAACC<br>TTGAGGGTATTAGAAGTTCCCTCATGGCCAAAAA<br>GTTGGAAGAACCATTCTGGCTGCTTAGGC  | C         | T       | CCTTATGGGTAGCGGCGACAATGACGATGGTT<br>TGGCAAAAAATTAGACGTAATCAACAACCCTG<br>ACAATTTAGACAGCGTCATAAGTGGCAGTGGC<br>AGC                                                                                   | NA                         | NA                          | NA  |
| Ca-II-SNP1363 | 19.54                  | Ca-desi-LG(Chr)8 | 571310                  | AGGGTTGCTCCTAAGATGTTGGGTGAACATCCTG<br>CTTTTTCGAGATATTATCTAACGAAATTTCAAACGT<br>AGAAATACAAATTTGTTTTTATTTATTTA | A         | G       | CTTTAACCGCAAAAGTTATCTAATGGGATAAA<br>ACAATTTCAATTTGCCTAGGTAGTATGTTGAGA<br>ATGGAATCTGTTGAGCACATCTGGTCTCGTG<br>GGTATTAATTGAATGGAATGTTCTTTTTGTTTT<br>GTAAAGTAAAAATGAAGGTTGAATTATACTTTG<br>GTCCCTAAATT | NA                         | NA                          | NA  |
| Ca-II-SNP1364 | 20.43                  | Ca-desi-LG(Chr)8 | 582713                  | TCTGCCACACTACATTTTCTAATTTCTTGATCTT<br>AATTTTCTGTTTATTAGATGATCCATTATATTATTA<br>TCTAATTAATTAAGTAGTACTCAAATGA  | T         | A       | ACCTAATCCCATTCTTCAAATTAATAATTTAGT<br>CATTGGAGCAACAAATCTCATCTAAGGTACAT<br>TCATTCATTAACCTAGCATTAAATTTACATTAA                                                                                        | NA                         | NA                          | NA  |
| Ca-II-SNP1365 | 21.32                  | Ca-desi-LG(Chr)8 | 926918                  | GACTATCGGCGATCTTCCATTTTTTTTAAATTT<br>TAGTTTTCCACGTATCCCTTCCACAAAGATAATT<br>GTACGAGGCACTCTTAAACTAAAAGGT      | A         | G       | GTTTATCTGATAAATGTTGAATTTACCGAAAAGA<br>GTTAATTTTCCACAAGTTGGGACGTGGCGAAGT<br>ATAGTTTAAATAATTTCTCATGAGAAATCTGTC                                                                                      | NA                         | NA                          | 127 |
| Ca-II-SNP1366 | 22.21                  | Ca-desi-LG(Chr)8 | 1082099                 | TTTATTCTTTCTGAATGACTCGACTTTGACTTGT<br>ATTATAGCTTTTTCTGTAAACATGATGTTGCTGG<br>CTTCATACCCGCTGATTATATCATATCA    | G         | T       | ATACGCAATAACATATTTTATAGAGTCAATTTTC<br>AAAGAGAGTAACATTAATGACTAATAAGTTAT<br>TCACAAAACCCCTTCAAAGCAAGATAGATTA                                                                                         | NA                         | NA                          | NA  |
| Ca-II-SNP1367 | 25.77                  | Ca-desi-LG(Chr)8 | 1371017                 | GGGGGACATCAATCCAAAGTCCATCTTTAAGGAG<br>CTGAAGTCCACCAACCTTGTATCTTTGAAAAGTA<br>AAATGATACCACCAGCATCTGTGTGGGCTCT | C         | A       | GGTATTTGAAGAAGGTGTTTTATGGATCCAAGG<br>GACCAATTTTGGAAACAAAAGTTAGCAACTACC<br>CTCCTTGTCTAAGCCAGAGCTAATAAAAGGAC<br>T                                                                                   | NA                         | NA                          | NA  |
| Ca-II-SNP1368 | 26.66                  | Ca-desi-LG(Chr)8 | 1384864                 | TTAAACAAGCTGAAGAAACAGTTCTCAAGCTAGAC<br>TTGGATGGGCTTGTGTTATTGGTGGAGATGACT<br>CAAACACAAATGCATGCCTCCTTGTGAGTA  | T         | C       | AAAGACTACATGATGCCCTCCTCCCGCAAAA<br>ATAAAGACTGCCCTGTTCTAGCCATAAATCAT<br>GCCGTAATAAAATTTATTTGCAAAAACCTGAA                                                                                           | NA                         | NA                          | NA  |

| Marker IDs    | Genetic positions (cM) | Chromosomes               | Physical positions (bp) | Flanking sequences/Forward primers                                                                           | ICC 12968 | ICC4958 | Flanking sequences/Reverse primers                                                                                                                                                                                                                              | Annealing temperature (0C) | Amplified Product size (bp) |     |
|---------------|------------------------|---------------------------|-------------------------|--------------------------------------------------------------------------------------------------------------|-----------|---------|-----------------------------------------------------------------------------------------------------------------------------------------------------------------------------------------------------------------------------------------------------------------|----------------------------|-----------------------------|-----|
| Ca-II-SNP1369 | 27.55                  | Ca- <i>desi</i> -LG(Chr)8 | 1388006                 | ATATGTTCCCTTGAACGTATATAATTTATGGCATGT<br>ACCGTTAATGCTGCTTGTACATGGTCTGACCTTGT<br>TCACATTTTTATGTTAATATAATGCAGAT | C         | A       | TGCAATAGTCTGAAGAGTTTTCTACGATAGTAT<br>ACGTACAGTGGTAATATTTTCTGTTGATCGAG<br>CATCAATCATAACATTTCCAATCATTTCTGCATA                                                                                                                                                     | NA                         | NA                          | NA  |
| Ca-II-SNP1370 | 28.44                  | Ca- <i>desi</i> -LG(Chr)8 | 1390716                 | TAAAATTCATAGCATTATGAATTTCAATTTATTCCA<br>ATGTTTTCTTTTATGTTTTGATGTTTATGAATGTG<br>TGATTTTCTGTGCGGTAATTTCAAGCC   | T         | C       | TCTACATGGGTTAAATATAGTTCTCGGCTTGT<br>ACTTTTGAGGAGTAAAGAATACATAAATAGATA<br>TACCTTCAAGCTCCACCATTGCTTTCTTAATCA<br>C                                                                                                                                                 | NA                         | NA                          | NA  |
| Ca-II-SNP1371 | 29.33                  | Ca- <i>desi</i> -LG(Chr)8 | 1391715                 | CTCTATGTTGTATTGGAGAAACACTGATGATCTCG<br>ATCTTTACTGTAGGTCCGATTCAAATCACTGGCC<br>AGGATCTGATGCAATTAGTCACACTCTACT  | C         | T       | TCAACAGAAACACGAGCCCTATATGATCTCCGG<br>TTTATATATTTGCCACCATCAAACGAATACTC<br>ATAGCAGGCCTAAGCTTGCGCACCAAGCTCCA<br>A                                                                                                                                                  | NA                         | NA                          | 183 |
| Ca-II-SNP1372 | 30.22                  | Ca- <i>desi</i> -LG(Chr)8 | 1427874                 | ACCATATCAGTAAAGGAGAATATGATCCCTGATGT<br>TATTATTATTATTTTTATTTCTTTTTGTCCAGACTTA<br>AGATCTTTGTACCTATAGCGTTCCTAGC | T         | G       | TTGAAACTGAGAGTTTATCAACGTCGCTGGAAG<br>TTATGTTTTTATCCAGCCGTTTCTAGCCAG<br>TGCTTGTCCAGTTGACGGGAACCAGCATCGCC<br>CA                                                                                                                                                   | NA                         | NA                          | NA  |
| Ca-II-SNP1373 | 31.11                  | Ca- <i>desi</i> -LG(Chr)8 | 1441739                 | TCGGAGAGAACATGATGTTTTCTTTTCTATATGT<br>GGTGAGTTATTGGTTATTTATGTTGCTTTTTATCT<br>ATGATGGAACAGATAAAGAAGATGATAGT   | T         | C       | CTATAAGGAAAAATGAAGTAGCTTTCTTCATGC<br>AGCATTGAGCCAATCAAGCACAATTGAGTAAAG<br>CTTTTAGGCTTTTGACAGCTTGATCAACCGCAT<br>A                                                                                                                                                | NA                         | NA                          | NA  |
| Ca-II-SNP1374 | 32.00                  | Ca- <i>desi</i> -LG(Chr)8 | 1465861                 | AGGGTTGTCCTAAGATGTTGGGTGAACATCCTG<br>CTTTTTCGAGATATTATCTAACGAAATTTCAAACGT<br>AGAAATACAAATTTGTTTTTATTTATTTA   | A         | G       | CAGCAGATAAAAATGAAAGTAAACAATTGTTTT<br>CAATAGATTTGCTAGTGGACTAACCGAAAGGAT<br>GCCACGAGTAAGATTTGGTTATGCACACGTGG<br>TGAACAACAATATGATGAGTGGAAAAATGATG<br>CTATAGGAGGAAGTGTAAACCAACCATTTTAA<br>GTGAAGGGAACTTTTTATAGGACCAAATGACC<br>AAAATGCAAAACAGGTTACCAAGAGGGGAGCC<br>A | NA                         | NA                          | NA  |
| Ca-II-SNP1375 | 32.89                  | Ca- <i>desi</i> -LG(Chr)8 | 1467895                 | AATTGAAGAACAAGTACTCATTTTGGCTGAAAGT<br>TTGAATCTTTTCTTGTGCTAAACTAAATGGTCTT<br>GTGGTTCGGTAATTATCACCATCTTGACA    | A         | T       | CACAGAACTCGAACTCAGAACCCTTCTGGTA<br>GATACCTTGTTCATAACATTACCTATTATGATCC<br>ACACATTGTTGCTACTGATCCATTCATGTGGAA                                                                                                                                                      | NA                         | NA                          | NA  |
| Ca-II-SNP1376 | 33.78                  | Ca- <i>desi</i> -LG(Chr)8 | 1478675                 | TTGAATTGGTGCAAAAAAGATTACAAAAAGAGA<br>TGGATTCTGAATTTGGTCTAGGGCTTCATACTGG<br>TTTGCAAAGTTTTTTTATTGCTGTGCTTTGA   | A         | G       | GATATCATAAAGCAAGCTATCAAATAACCAATT<br>GCAGGAAATAAAGAAGAAGAAAAAAGACTT<br>TGAGAACAGAAAAATGAAAGTCAATTTTCAG<br>A                                                                                                                                                     | NA                         | NA                          | NA  |

| Marker IDs    | Genetic positions (cM) | Chromosomes      | Physical positions (bp) | Flanking sequences/Forward primers                                                                            | ICC 12968 | ICC4958 | Flanking sequences/Reverse primers                                                                                                                                                                                                                                                                      | Annealing temperature (0C) | Amplified Product size (bp) |     |
|---------------|------------------------|------------------|-------------------------|---------------------------------------------------------------------------------------------------------------|-----------|---------|---------------------------------------------------------------------------------------------------------------------------------------------------------------------------------------------------------------------------------------------------------------------------------------------------------|----------------------------|-----------------------------|-----|
| Ca-II-SNP1377 | 34.67                  | Ca-desi-LG(Chr)8 | 1478723                 | CAATTGGTATTTGGCGGTTATGTTTGACAAAGTAC<br>TAGCTACTAGTATGTCTACATTGGTAAGAGATACC<br>TTAGATGGTTGCATTTGTTTACTCAAGA    | T         | C       | CTTCTTCTTTTATTTCTGCAATTGGTTATTTGA<br>TAGCTTGCCTTTATGATATCTTATTAATCTCGAA<br>CCTATTTGGAAAAATGAAAAATGATGTTACATGTT<br>CAATTCAGCTAATCAAGGTAGAGTGCTTCATTT<br>GCATGATCCCTTGATTTATGGTTTAGAATATAG<br>CTATTTTTATACACTTTACACCAGCAACAATAT<br>CAAGTTGATTTGATGTAATGATTTTTGCAAGG<br>CCTGCAATTTCTTAGATGCAAGATCAACTACAGC | NA                         | NA                          | NA  |
| Ca-II-SNP1378 | 35.56                  | Ca-desi-LG(Chr)8 | 1485942                 | TGGTGGATTCTTGACCTAAAGTGTGGCTTTGCAAT<br>ATGAATTTGTAATCATGTGAATTTGAACAGTATG<br>CTTGGATGTCCTTAAATTTAACCATGAGAA   | C         | T       | TCATATTGAAGTTGCAATTTAGAATTTATTGCCAT<br>CCATACTATCCCAATTTATACGAATAAATTTATT<br>CATATTGCAAGACACGTTTTGGGTCAAGAGTC                                                                                                                                                                                           | NA                         | NA                          | 215 |
| Ca-II-SNP1379 | 36.45                  | Ca-desi-LG(Chr)8 | 1486798                 | TGGGTGTTTCTTGCAAGGCGTTGTGTGCGGGCA<br>GGACATCATGGGAATTCATGATAAATTTGAATAAAA<br>TTTGGTTACTAATGTGACCAGTTAGTGGTTT  | T         | C       | ACATAATTTCCAATTTTATATGAATAAAAAATT<br>CATGTTACAAGCCAAATTTATTTTGTTAAGACAA<br>CTACCAAAATAAAAAATTTGATCACCAACACC                                                                                                                                                                                             | NA                         | NA                          | 113 |
| Ca-II-SNP1380 | 37.34                  | Ca-desi-LG(Chr)8 | 1487952                 | ATTTGATATTCGAGACTAGTAGATTGCCTTCGATA<br>AATCAAGATGATGATATTGTGTTTCAATCACCTTA<br>GATTTGAAATTTGATCTTGTGATGATGATG  | G         | T       | ATTTAGGACCTTTTACTCTAAATATTAATTT<br>TACATCTAAGGGACAATACCATCATCTCAAATT<br>TTGGTTTTAAGATCACATGTTTATCAAGGTCCA                                                                                                                                                                                               | NA                         | NA                          | 161 |
| Ca-II-SNP1381 | 38.23                  | Ca-desi-LG(Chr)8 | 1488017                 | CCTTAGATTTGAAATTTGATCTTGTGATGATGATG<br>GTGGACCTTGATGAACATGTGATCTTAAACCAAAA<br>ATTTGAGATGATGGTATTGTCCTTAGATG   | T         | C       | TTAGGAACATCTATGTTCAATATCAATGTCGT<br>CAAGGTACAATAACATCACTCTAATTTATCGAAT<br>TTAGGACCTTTTACTCTAAATATTAATTTT                                                                                                                                                                                                | NA                         | NA                          | 180 |
| Ca-II-SNP1382 | 39.12                  | Ca-desi-LG(Chr)8 | 1491840                 | GGTGCCAAAGGATATCAATTTACATACTACACAATA<br>GTCGCTTGGGTTGGAAACTGTGAGTGGAAATGTT<br>ACATCACGTGATTTTCTGACCTTTATTATGA | T         | A       | CACCAATCCTTGATTTATCGAGGCTATAAAGT<br>CCAGGGTCTACAATCATTGGCTTCCCTCTCTTA<br>TTCTGAAATAAAATAAAATTTGGATATAAAAAAG                                                                                                                                                                                             | NA                         | NA                          | 186 |
| Ca-II-SNP1383 | 40.90                  | Ca-desi-LG(Chr)8 | 1492057                 | AGTTTGGCTACATCTTTCAACTCTACACAGGTTT<br>TATTTCCCTTCAATCTCTCACCTTATTCTGGATTTT<br>GCTAATGTAGTATGTGTTTGAAGTGCTT    | C         | A       | TGATTCGAAAAAAGAAAAACATAACATAAAAAGG<br>TAGGAAAACATGCCTGTAATGAAAGGAACAAGA<br>GGAAGCACTATGCGTGTAATGAAAGGAACAAG<br>AG                                                                                                                                                                                       | NA                         | NA                          | 156 |
| Ca-II-SNP1384 | 41.79                  | Ca-desi-LG(Chr)8 | 1493698                 | ATGTGGTTTGCAATGAGTTTTTATTATCATATGAAAT<br>TGGGATTGTATGGTTGGACGACCCTAAATCAATC<br>ACGAGATGCATTTTGACTCAAAATGTGG   | C         | T       | AGCCACATTTTGAGTCAAGAATCCACCATCTCA<br>TGATTAATTTAGGGTCAATCCAAGCTTACTATC<br>ACAATTTTATGTAATACACAATCCATATATCAA                                                                                                                                                                                             | NA                         | NA                          | 174 |



| Marker IDs    | Genetic positions (cM) | Chromosomes      | Physical positions (bp) | Flanking sequences/Forward primers                                                                      | ICC 12968 | ICC4958 | Flanking sequences/Reverse primers                                                                      | Annealing temperature (0C) | Amplified Product size (bp) |     |
|---------------|------------------------|------------------|-------------------------|---------------------------------------------------------------------------------------------------------|-----------|---------|---------------------------------------------------------------------------------------------------------|----------------------------|-----------------------------|-----|
| Ca-II-SNP1385 | 42.68                  | Ca-desi-LG(Chr)8 | 1496943                 | TGCGATGAGTTAGAGTAATGGTATTGTACTTTGATGACATTGATACTTGTGCCAAGATGGTTCTAAATTC AATCATTAGAATGACATAGTTGTGTCTCG    | A         | G       | ATCAAATTTTGCATACAACCTTTATCGAGACAATT CAATATCATAGCAATTTATTGAATTTAAGAGCAT CTAGACTCATATCAATTTTGTATTGGAAGTCA | NA                         | NA                          | 160 |
| Ca-II-SNP1386 | 43.57                  | Ca-desi-LG(Chr)8 | 1501529                 | TTTGTTGGTGCATTTGCTTTATAATTATTATTATT ATTCTATTGTTAGGTTGTTAATATTGTTAAGTTAG TTATATGTTGTTGAAGTTTGTAAAGTTG    | A         | G       | GATTCATGAAAAAGTTGATTACAATATGAGC ATGAAACACTTTATACATTCATCCTAATTATACT TACAAATCTTAACTAATTTGTAACATAACTAA     | NA                         | NA                          | 112 |
| Ca-II-SNP1387 | 44.46                  | Ca-desi-LG(Chr)8 | 1526844                 | TACTCACTGGAATTGCAGCTATAGGTTCTGTTTT GTAGGAAATAATGGATCAATTGCAGGTATAAATGCT ATGATGGCAGGTTCAATTAGGTGCTGCAGT  | G         | T       | AAGTGGACTCAACTGTTTCTTCCAACAGTTTGA AAAATCCACCACAGTTTCTATACATTTCAAAAAC CATACCAACTTGCCACCATGCTCAAAAGCATT   | NA                         | NA                          | 148 |
| Ca-II-SNP1388 | 45.35                  | Ca-desi-LG(Chr)8 | 3401303                 | TGTAAGTGGAGTATCCGTACGGACACACTTATGAT TCTTGTTGTGATGCTGCTATCTTTTTCTTCGGGTT GATGTAATTGGCTCTTTGTCAATTATTATT  | G         | A       | AGACAGAAAATCATGCATCCACCCATCATACT TTCCATATATTAAAGATGTCAGGAATATATACA CTCACGGACTTGGCTTGGTAATTGTAATCAAAT    | NA                         | NA                          | 177 |
| Ca-II-SNP1389 | 46.24                  | Ca-desi-LG(Chr)8 | 3563996                 | CTTTTTGGAGTATCCTTCTGGTATAATGCCTTTAT ACAGGTAATAAAGTACTCATTCTGTCCCTTTTTTAT AAGCCACTTGCTTTCATACAAATATTGCGC | A         | G       | ATTTGAAACGCTTTCGACGTATCCAACAAAAGC CATGTTTGAATTAATGGATGGATAGTTCCCTT GTCATGATTAGCATGTATCAAATTTATCAGTTTCT  | NA                         | NA                          | 130 |
| Ca-II-SNP1390 | 47.13                  | Ca-desi-LG(Chr)8 | 3670804                 | CAATTGGTATTGGCGGTTATGTTTGACAAAAGTAC TAGCTACTAGTATGTCTACATTGGTAAGAGATACC TTAGATGGTTTGCATTTGTTTTACTCAAGA  | G         | T       | CTATTGTTAGAAACACCTTTAAGATTGTTTAGTC CAATCTGAGATGGTATGCTTCTTAAACCATTTT CATCATCTTCAATTTTATTTTGCAGAACATCTC  | NA                         | NA                          | 214 |
| Ca-II-SNP1391 | 48.02                  | Ca-desi-LG(Chr)8 | 3683992                 | TTTATACCATTGTCTGGGATACTGTTAAGTCCAT ATATTGATCTTTGAAACAACATGTCATGTGTTCC TTTCTAGGTGCACCATAACCCTCAGGTTGG    | A         | C       | ATTATACTCGCCTTAGTTGCTACCTACAACCTTG GAACTGGAACAATGAATGTCAAGAATGCTTTC TTACATGGTACCTAGAAGAGAAAATCTATGTG A  | NA                         | NA                          | 126 |
| Ca-II-SNP1392 | 48.91                  | Ca-desi-LG(Chr)8 | 3684044                 | AAACATGTCATGTGTTCTTTCTAGGTGCACCATA ACCCTCAGGTTGGATCACATAGATTTTCTCTTCTA GGTGACCATGTAAGAAAGCATTCTTGACAT   | T         | C       | AATTGACTTCAAGAAAATATTTTCTCCAGTTGTG AAGCACACTAGTATCAGAATTATACTCGCCTTA GTTGCTACCTACAACCTTGAAGTGAACAATG    | NA                         | NA                          | 133 |

| Marker IDs    | Genetic positions (cM) | Chromosomes      | Physical positions (bp) | Flanking sequences/Forward primers                                                                    | ICC 12968 | ICC4958 | Flanking sequences/Reverse primers                                                                      | Annealing temperature (0C) | Amplified Product size (bp) |     |
|---------------|------------------------|------------------|-------------------------|-------------------------------------------------------------------------------------------------------|-----------|---------|---------------------------------------------------------------------------------------------------------|----------------------------|-----------------------------|-----|
| Ca-II-SNP1393 | 49.80                  | Ca-desi-LG(Chr)8 | 3710991                 | GCAGGTTTGACTTCCCTAGTAAAGCTCTATTCTGACATGTGTGCTTTGTGCAGTTCTGAGTCAGAGACCTTGCTCATTCTCCACAATGACAATAGCC     | C         | T       | TTTACTACCAAACCTGGATGGTGAACCTGAA GAGACTGATTCAATAAATGCCAATTCTCTCTAG AAATGCTAAAAGCTTATTCCAAGATAACTCA C     | NA                         | NA                          | 100 |
| Ca-II-SNP1394 | 52.47                  | Ca-desi-LG(Chr)8 | 3728139                 | ATAATCCTTCTTTGAAATAGCTTTTGGACTTTATTG GTTTAGCATTAAATCAATTATGCTCTTTTAGAAA GTACTCTTGACGTTTCTTCATTGATCTT  | A         | G       | GTTTTCTGCACAATAACAACAATACTGCATCTT CTCTGAAATAGCCTGTAATTCATCTCCAACATT CTCTAGCTACACTCAAGACAGAGAATGTACCAT C | NA                         | NA                          | 210 |
| Ca-II-SNP1395 | 53.36                  | Ca-desi-LG(Chr)8 | 3742949                 | TCTTGAATTATGCTTTGGGTGGATCACCTGTTTTG TTTTATATGAGGACCATCTTTTATTATTTTCAA TAGAATTTAATAGAAGTTAAGACTGAGGG   | G         | A       | AAACTCAAGGTGATTCTAAATATACATATCTT ATGAGTGCAATATATTTCTTATCACCACCTTAGT CAACTGAAGATATTGTTCCCTTTGGATATTTT    | NA                         | NA                          | 205 |
| Ca-II-SNP1396 | 54.25                  | Ca-desi-LG(Chr)8 | 3747818                 | ATACAAGACCTTCGACAATACCATTGTACCTTCT AGTCCTTCTATGCATGTATCTGGATTACAAGAAC AGCACTCAGCCATGTTCTTAGATCAGAGCT  | C         | T       | GTGTTATAATTTCTCTGTTTTTATTATTATTCT TATTTCTCTGTTATTGTAGCTAACAAATTCGTC ACACAGGGAAAGATAACAGTACTGGAAATCT     | NA                         | NA                          | 125 |
| Ca-II-SNP1397 | 55.14                  | Ca-desi-LG(Chr)8 | 3753564                 | TTTTACTATTAACCTGGTTGATGTAATATATTCAC ATATTTATCTTTTTTCAATTTTATAAATGCGTTGA ATTTGATTTATATATGATGACTCCAT    | G         | C       | GAATTAGTGGTTTATGTTGTCAGTAAGTGTAAG ATTGTTTATCGACAATGCACTATTATTTTTTTT TGAAAAAAAAAACGATATAAATCTTTCAAAT     | NA                         | NA                          | 158 |
| Ca-II-SNP1398 | 56.03                  | Ca-desi-LG(Chr)8 | 3787620                 | GTGTCATCTCTGGCTAAGTGCATATTTGGTTTAC AATGAGATTGGAAAAATCACGGTGACTCATCGTGA TTTTGCCAACTCACCATGAATCAAACATG  | C         | T       | AAAAGGCTCTATTATTGTTCTACATACCCTTTT TGGAATCGGTAGATCCAAGATGGTTAACAACTT AACATGGACTCAAATATGGATATTAACCTTAGT   | NA                         | NA                          | 175 |
| Ca-II-SNP1399 | 56.92                  | Ca-desi-LG(Chr)8 | 3788385                 | TAGTTTTAGGTTTATCATTATTTGAATTTGGAAG TGTTGTTGTCCAATACTGCTCCTGATGGAATAGAA AATAACTTTGTTTTATGCACTACTATT    | C         | A       | TGCTGCGACCAGGTAATTTCTGTATATGCAAA TAATTCCAGGGTACGTTTATCTGGAATTTTTTG CTTCTGTTATGACTGGCTGAGATATAAGGAAA T   | NA                         | NA                          | 145 |
| Ca-II-SNP1400 | 57.81                  | Ca-desi-LG(Chr)8 | 3806673                 | GTAGATAGTATCAGAGTCGTTAATTTGATGTGACC ATACCTTCCAACAATGGTGTGTTGATTCCTCGTGT AGTAAATTTATGTCGCAAGTCTCTTGTTT | A         | G       | TTCAAACATTGTCAAAAACCCGCTTACAATG TATCAAGATACATGTATACGTAGTAAAGTCGAT TCATCAACATTTTTATCATTGATTACTATAG       | NA                         | NA                          | 188 |

| Marker IDs    | Genetic positions (cM) | Chromosomes               | Physical positions (bp) | Flanking sequences/Forward primers                                                                           | ICC 12968 | ICC4958 | Flanking sequences/Reverse primers                                                                                                                                                                          | Annealing temperature (0C) | Amplified Product size (bp) |     |
|---------------|------------------------|---------------------------|-------------------------|--------------------------------------------------------------------------------------------------------------|-----------|---------|-------------------------------------------------------------------------------------------------------------------------------------------------------------------------------------------------------------|----------------------------|-----------------------------|-----|
| Ca-II-SNP1401 | 58.70                  | Ca- <i>desi</i> -LG(Chr)8 | 3811946                 | TCCAGAATATTCAGACAGAAATCCCCTCCTATTT<br>TCGTGGGAAATACTTTTTCTTCCTTCATTACAAT<br>CTCAACCATGGAGTTTATAACATGCAACA    | T         | G       | CTACACTAGTAAACAAGTCTTACAAGCTAATTTG<br>TCATAGTAGAAAAAGAGCACTTCCCTATAAGTG<br>AAATTGACTTTCCAATTGACAAGAAATATATATA                                                                                               | NA                         | NA                          | 169 |
| Ca-II-SNP1402 | 59.59                  | Ca- <i>desi</i> -LG(Chr)8 | 3823729                 | TTTGCCTTTCTATATTTATTTTTTTGTTCCTTTTT<br>CCCCCTTATGATGAATGCCTCAAAGGGATTTTAT<br>TTATGAAATAGGACTTGAAAATCAACGT    | G         | C       | CAAAGTTCAAACATAAACTAAAACCTTTCTCAAAG<br>CCTAGAAGAAGCTTTCTCATAGCCTAGAAGAACA<br>CAACATTTAAAATTACAAAATTTGTTGTGTTTA                                                                                              | NA                         | NA                          | 145 |
| Ca-II-SNP1403 | 60.48                  | Ca- <i>desi</i> -LG(Chr)8 | 3868129                 | CAAATGACCTATTTACGTATCACATGGCCTACCTA<br>AGCTCTCTCTCTCTTTTTGTTTTCAATTTGAAAC<br>TGTAATAGTATAAATTTTGGATACAA      | G         | A       | ATGGGGGATGATACATGGACACAGTTATTTCT<br>CATCATTTTGAAAGATCCTATCCATATCCTTCTT<br>TTAATGTCAAAGATCTTGATACGGTTGATAACG<br>GATGCATTGACCATTTATTTCCATCCCTTTATGA<br>AGACGATTGGGATGTTCTTATTGCACATTTTCT<br>CGGAGTGGATCAGCTGG | NA                         | NA                          | 210 |
| Ca-II-SNP1404 | 61.37                  | Ca- <i>desi</i> -LG(Chr)8 | 3903353                 | TTGTTTCTATTTAATTTTATCTCTTTGGGAAAAAC<br>AATGTTACTTACTGTGATAATGTGAAGGGAGGGA<br>CCCTAATGCAGAACTGTAATTTCTGAGCAC  | G         | T       | TAAACCTTCATCCAACATTAATTAATCATTAA<br>AATCAATTTACATCACTGCAAAGCCAAACAATT<br>CTTTGTCGACTGCCCTACCCATTACAATTTGCA                                                                                                  | NA                         | NA                          | 187 |
| Ca-II-SNP1405 | 62.26                  | Ca- <i>desi</i> -LG(Chr)8 | 4050848                 | CTTCCCCTTTGTGGGCTCTCCTGAGTTCTCTCAT<br>CTTGGCTGGGGCACTGGTTTACATTGAGAGACC<br>TAGAACTTGCAACAAACAAGTTTTCGAAGGA   | T         | C       | AAACTTACAGATTATTGAGTAGCTTCTTAATAGC<br>CACTGGATTCCCATTGATCAGCTGGCCTTGATA<br>AACAACCTCATATCCACCTTCACCAATAACATT                                                                                                | NA                         | NA                          | 246 |
| Ca-II-SNP1406 | 63.15                  | Ca- <i>desi</i> -LG(Chr)8 | 4051597                 | GAAACTACTCAGTACTGGTTTATATAATTTGGATT<br>CTTGACCCCTAGAAATTCCTGTAAATTTGAGGTT<br>GTTGGTTTATGAGTATGTTAAACAATGAAAA | T         | C       | AATGATCTTACGCTTTAGCTGTTCCAAGAAGAA<br>TTTTAATCCGAGCCTCCCATGTGAGAAAACCAT<br>ATTGCCGCATGGCTCCATGAAGCCATTGCTCTA<br>A                                                                                            | NA                         | NA                          | 181 |
| Ca-II-SNP1407 | 64.04                  | Ca- <i>desi</i> -LG(Chr)8 | 4054628                 | GTGGTTCCTTTGGTTGAGCAGAGCGAGTATTGAG<br>TAGAGGCTGTAAGCTTTGACAATGATGCTCATAT<br>TTGGTCGAAACTCAGCTTCATATTGAACACA  | T         | C       | ACTACATAATTATTTGAAGGTAATTTGTGTTATA<br>ATGTAGTTTTTATTGATTTGTTGCACTTGTGTA<br>TTTTTGCAAAGATGGCTGCTGTTGCTGCACT                                                                                                  | NA                         | NA                          | 171 |
| Ca-II-SNP1408 | 64.93                  | Ca- <i>desi</i> -LG(Chr)8 | 4099504                 | CCGACTGCTCTCGCAGTTCATATGAGTTGCAGCC<br>ACCTTTCTATTTGCAGTCCCTGTGATTTTTGTA<br>GGAGAATAACATCATCAAATTCACAGCACCG   | G         | A       | TTGTGTGGTCACCGTCAATGATGTTCTGAGGCT<br>TTTGGTACAGGTGGGTTCTGTGGTCAAATATA<br>TTTGAATTTGAACTTACCTTTATATTTTATACA                                                                                                  | NA                         | NA                          | 138 |

| Marker IDs    | Genetic positions (cM) | Chromosomes               | Physical positions (bp) | Flanking sequences/Forward primers                                                                           | ICC 12968 | ICC4958 | Flanking sequences/Reverse primers                                                                               | Annealing temperature (0C) | Amplified Product size (bp) |     |
|---------------|------------------------|---------------------------|-------------------------|--------------------------------------------------------------------------------------------------------------|-----------|---------|------------------------------------------------------------------------------------------------------------------|----------------------------|-----------------------------|-----|
| Ca-II-SNP1409 | 65.82                  | Ca- <i>desi</i> -LG(Chr)8 | 4193971                 | CACTGAGCAGGAGGAGGATGTCCTCAGCCTCCA<br>CAGATGGAGTAGGTCGCTGATGATATTCATGATA<br>CTTCTGCACATGCTGATGATGCTGATGAGTCG  | G         | A       | CGAGCCACGTGATGCTCGTACTGTGTTAACAC<br>ACATGTCACCGTCGGTCCTCCGGGAAATTCGG<br>TCTGCTGATCCTGATCATCAATATCAGCAGCAT<br>CAT | NA                         | NA                          | 170 |
| Ca-II-SNP1410 | 66.71                  | Ca- <i>desi</i> -LG(Chr)8 | 4194075                 | ATGCTGCTGATATTGATGATCAGGATCAGCAGAC<br>CGAATTTCCCGGAGGACCGACGGTGACATGTGTG<br>TTAACACAGTACGAGCATCACGTGGCTCGGAG | A         | G       | AACATTTATATAAATATATAATTAATTAATAAAC<br>TTAAACACAATAAACAAATAATTAATATAAAA<br>ATAAATTAACATTTACCTCTCTTTCCCATAG        | NA                         | NA                          | 168 |
| Ca-II-SNP1411 | 67.60                  | Ca- <i>desi</i> -LG(Chr)8 | 4195630                 | TCCGTGATGGATTATCAGTTATATTAATACCTGAT<br>CAGTGGTGAATTTGTCGGTATAATCTATTATATTT<br>CTTGAGGCAGGAACCTCAACTCTACTCATA | T         | C       | GTTACACAGTTTCGAAAGTTTCGAAAATTTCAA<br>TTTTTTTTTAAATTTATTTATTTTATACATATTA<br>TTATTTATATTTACTATTTTTTAAATTAG         | NA                         | NA                          | 135 |
| Ca-II-SNP1412 | 68.49                  | Ca- <i>desi</i> -LG(Chr)8 | 4228643                 | AATTTCTTTGTACCTTTTTATAAGTGATATCTTTTT<br>TTATTTTTTAACTATATTAATTTATTTACTAACG<br>TACTTCTAATTAATTTACATATTTTTT    | G         | A       | TGTTGATTAATTTTTTAACAATTTGTTTTACAT<br>GATTATCTTGTACAAGAGATAATTAGTTAAATTA<br>TATTATTTAAATATATTTATTGTTGATTG         | NA                         | NA                          | 144 |
| Ca-II-SNP1413 | 69.38                  | Ca- <i>desi</i> -LG(Chr)8 | 4252710                 | TTGGTGGAGCAACAATGCATGCATTTAGAGGTGG<br>AGCCCCAAATATGCCATTGACATCTAGATTTGT<br>ATGAGTTTGTCAATGCCCTATGTCTCACGCT   | T         | C       | ATTTATTGAAGATGGTGGAAAAGTTGGAAC<br>AATAAAAGGAGGTGATTGATTATCTGTTGTGAT<br>TTGCATTACAGGTTATGACAAATGGAAGATTGG<br>T    | NA                         | NA                          | 206 |
| Ca-II-SNP1414 | 70.27                  | Ca- <i>desi</i> -LG(Chr)8 | 4257596                 | CTTTATATAAAACTTTTTTTTTCTCTATTTATA<br>AGTCGCTTTTGTAAATGGCGTATTCCTTAAGAAAG<br>TTCGAGTTTGCAAATGCGACTTTCTTGA     | T         | G       | CCAAATACCATTGTAAAAGCAATTTCTTTAAG<br>ATTTTTTTTTTAAATTTTTGTTTAAATTAACAAA<br>GAAATGCTCAATTTTTTTTTTAAAGATTTT         | NA                         | NA                          |     |
| Ca-II-SNP1415 | 71.16                  | Ca- <i>desi</i> -LG(Chr)8 | 4324943                 | ACGCGCCGCCCGCCCGCCCGGCTTGCTCGG<br>TCCGGTCCGGTTGTGGTGTATTAAGTTTTTCAG<br>ATGTTTGCCACGTCAAAACCTAAAGCTGAGT       | A         | C       | GAGCACGAAGTCCATTAAGTCCACCAGGAA<br>CGTGCCCTCAGAAATAGGAAACGTGATTGACAA<br>GGTTCTTGACCGGGCAAAGTCAAACGTGG<br>GAAA     | NA                         | NA                          |     |
| Ca-II-SNP1416 | 72.05                  | Ca- <i>desi</i> -LG(Chr)8 | 4325065                 | CCCGGTCAAGGAACCTTGCAATCACGTTTCTAT<br>TTCTGAGGCACGTTCTGGTGGCCAGTTAATGGA<br>CTTCGTGCTCTTGGATCCCCCTTTTTTCTC     | A         | T       | AGGGGGAGAAGTGAGAAAAGCCTCAGATATGG<br>AGAGCTTTTGGTGTGCTCTTCCAAGTGAGGTG<br>AGCTCTCTATTTATAGATGAGTTCAGCAACTGG<br>ATC | NA                         | NA                          |     |

| Marker IDs    | Genetic positions (cM) | Chromosomes               | Physical positions (bp) | Flanking sequences/Forward primers                                                                            | ICC 12968 | ICC4958 | Flanking sequences/Reverse primers                                                                              | Annealing temperature (0C) | Amplified Product size (bp) |
|---------------|------------------------|---------------------------|-------------------------|---------------------------------------------------------------------------------------------------------------|-----------|---------|-----------------------------------------------------------------------------------------------------------------|----------------------------|-----------------------------|
| Ca-II-SSR424  | 72.94                  | Ca- <i>desi</i> -LG(Chr)8 | 4335277                 | TTTTCAAATATCCTTTTCATTGATAC                                                                                    | (TAA)16   | (TAA)18 | GGCCAACCATAGATAAAATATACAA                                                                                       | 57.04                      | 239.00                      |
| Ca-II-SNP1417 | 74.72                  | Ca- <i>desi</i> -LG(Chr)8 | 4369989                 | CAAATGACCTATTTACGTATCACATGGCCTACCTA<br>AGCTCTCTCTTCTCTTTTTGTTTTCAATTTGAAC<br>TGTAATAGTATAAATTATTTGGATACAA     | C         | A       | TCTACAAGAAGCGTATCTATGAATATATATCTCT<br>TTTATTATCTTAGTAGCTTTCTATTATTATCTTA<br>CGACTTTACTCTTGTGTGTTCTAATTTTATT     | NA                         | NA                          |
| Ca-II-SNP1418 | 75.61                  | Ca- <i>desi</i> -LG(Chr)8 | 4370215                 | ATTTTCGTTCTACATTCTTTATCTTTAATAAAATATTT<br>ATTATTTTTAGATTTTTGACTTTTTGATTCTTAATAAA<br>TCTTATTAAGTTTTTCTTTGATTAT | G         | A       | GCTTCTTTTTGAATAATTTGTTTTGTTGTC<br>CAATAAGTTTTTTTATCTTTCAATGTAATGGA<br>GTATACATAATAAGTATAGAATATAGTAAATC          | NA                         | NA                          |
| Ca-II-SNP1419 | 76.50                  | Ca- <i>desi</i> -LG(Chr)8 | 4415284                 | ACTAACAGTTTTTTGTCTGAATCGTTCGGTCTTG<br>ATTTTGATTCTCTACATGTGTGATTGCACGATCTT<br>CATCTTTATCCTTCGCTTCTTCTCGAGTA    | A         | G       | TCCTATCTCCGTTTCCTCTTCGATTTCTTCATCC<br>TCCAATGAAGTTTGTGTTGCGAACAAACCAATT<br>GTTCCGGTAGCAGGAAATGAACATGAACCTGAA    | NA                         | NA                          |
| Ca-II-SNP1420 | 77.39                  | Ca- <i>desi</i> -LG(Chr)8 | 4446531                 | AGTTATAGGCCTTCTAAAAGGGCCCGAGCTGATC<br>ACAGGTCGTCTGCACCAAGCGATGATGATCTTGA<br>TGGGATGAATAGTTACCTGGTAGGTCACAAC   | A         | G       | TCTTTCTAAAAAATAAAAATAAAATCAATGTT<br>GAAAGTACCTCATATTGATCATCGTCTTTTGA<br>TCAGTAGTTGGTTATCTCCCTTGAGTGCCA          | NA                         | NA                          |
| Ca-II-SNP1421 | 78.28                  | Ca- <i>desi</i> -LG(Chr)8 | 4515504                 | TTTTTAAGTAAAAATTTGTTTTTTAGGGAGGTC<br>TAAAGCGCTTGCTTTGGTAGCCTTACCCTTAAACC<br>GGCTCTACAGAATGAGCCGCAGATAACTT     | A         | C       | CAGTCTGTCTGGACTTCCTTAGTGAAGACAT<br>AACTATTATTGCGACAAAACCTCATGTTGAATAAA<br>GTGAATACAGGTATCAAATAGTAACCATATTTT     | NA                         | NA                          |
| Ca-II-SNP1422 | 79.17                  | Ca- <i>desi</i> -LG(Chr)8 | 4521706                 | ATAACACGATCAACATGGCCTTCATCTCCCCCTC<br>AACATTGCGCTCAACTTCCTCCTCAACAGTTTCAT<br>CAACAAAGCTCTCAACTTGACCCACTCTCT   | T         | C       | GGAAGAAGGCGCCCGAAGTGACGAGCAGTC<br>GCGGTCGAAGCTTGGCTCTAGGCAATAGGCTA<br>GTAGTAAGAAGTTGAGGTGTCTGAAATTGCAAG<br>GACG | NA                         | NA                          |
| Ca-II-SSR425  | 80.06                  | Ca- <i>desi</i> -LG(Chr)8 | 4611654                 | TAGATGAATTGCAATGCCCA                                                                                          | (GA)9     | (GA)8   | CTTTTGCATCGCATCAGTTC                                                                                            | 60.04                      | 140.00                      |

| Marker IDs    | Genetic positions (cM) | Chromosomes               | Physical positions (bp) | Flanking sequences/Forward primers                                                                           | ICC 12968 | ICC4958 | Flanking sequences/Reverse primers                                                                                                                                                                                                                                                                                                                                                                         | Annealing temperature (0C) | Amplified Product size (bp) |
|---------------|------------------------|---------------------------|-------------------------|--------------------------------------------------------------------------------------------------------------|-----------|---------|------------------------------------------------------------------------------------------------------------------------------------------------------------------------------------------------------------------------------------------------------------------------------------------------------------------------------------------------------------------------------------------------------------|----------------------------|-----------------------------|
| Ca-II-SSR426  | 81.84                  | Ca- <i>desi</i> -LG(Chr)8 | 4714629                 | TGGAGTACTTTAGATACACAAAGGTC                                                                                   | (TAA)19   | (AAT)18 | TTCAGCTAAATAAATTTGAAGATGTTG                                                                                                                                                                                                                                                                                                                                                                                | 57.22                      | 129.00                      |
| Ca-II-SNP1423 | 82.73                  | Ca- <i>desi</i> -LG(Chr)8 | 4930608                 | ATGCTGCTGATATTGATGATCAGGATCAGCAGAC<br>CGAATTTCCCGGAGGACCGACGGTGACATGTGTG<br>TTAACACAGTACGAGCATCACGTGGCTCGGAG | A         | G       | GAAGAAACCCATTAAGTAGCTGCTGCGGAAGC<br>ATTCTGCATCTCCACAATATCAAAGAATAGGT<br>TTCGCAGCAGCACACTGATAATTAATTAATA<br>AATAAACAATGGCTCTCTCTCTCACAAAGT<br>AACCGTCTCTGTACCCTTCTTGCTCAATCTCTC<br>CCGCTGTTTCATCGGCGAGGGTTTGCAGCCGC<br>TTCTGATGCTTTCAGTGAGAATTGAATGGGTAG<br>TCTTCCAAAGCCCGCAAGCTCCGAAAGC<br>GTTAGCGGCGAAGACGAACTACTGAGCCCGC<br>CATGCCCATTTCTCATTATCTCGATGCTAAATC<br>CACCGTTCAACAAGAACACCGTTTCGATGAACA<br>AT | NA                         | NA                          |
| Ca-II-SNP1424 | 83.62                  | Ca- <i>desi</i> -LG(Chr)8 | 5010723                 | ATTGACTGCTTCAACAAAACATCATCTTTGTCAT<br>CATCACCGCCCTTCTCCTATGCGTCATCTTCTTCA<br>TCAGCAGTTACCTTAGCAATAGGTCTCGGA  | T         | G       | GTTAGCGGCGAAGACGAACTACTGAGCCCGC<br>CATGCCCATTTCTCATTATCTCGATGCTAAATC<br>CACCGTTCAACAAGAACACCGTTTCGATGAACA<br>AT                                                                                                                                                                                                                                                                                            | NA                         | NA                          |
| Ca-II-SNP1425 | 84.51                  | Ca- <i>desi</i> -LG(Chr)8 | 5062175                 | TATCTTTTGTGGGTATAAAGTTGTTAGAATTTGCA<br>ATAGATCTTTTCTCTGTCTTTGTTTGTGTTTCT<br>TTCTACCATTGACTTTTCTTGATCCCAT     | A         | G       | ATTATTTGCATATATACATATATAAAAAGTTGTT<br>ATTTAATTTCTTCATGTGTAATACTAATACACGA<br>GTCTAATAATTAGTTGATTAATATATAGGCAA                                                                                                                                                                                                                                                                                               | NA                         | NA                          |
| Ca-II-SNP1426 | 85.40                  | Ca- <i>desi</i> -LG(Chr)8 | 5111434                 | CTTTGCAACCCACGGTGGTCTCCTCTTCAAATCT<br>AAGATTTGGTACAAGAGAAGAGCTTCGTCACATCA<br>TCATCGCCGCCCTTCTACCTTACCAAC     | G         | T       | CAGCAATAAGAAGATGGGGATATACTGTCATT<br>CTATTATGGGAGATTTTACAAGTCTGACAAACA<br>TCAGAGATGGGCTGGAAAGTAGGAAAGTGAGAA<br>GCAGGAAATACATTTTTCGGGCAAAAGATTTTCA<br>CTGGACCAAGGCAAC                                                                                                                                                                                                                                        | NA                         | NA                          |
| Ca-II-SNP1427 | 86.29                  | Ca- <i>desi</i> -LG(Chr)8 | 5125571                 | AAATGAACCATCATCTCAACACCATTTTCTGCTT<br>TGGAGATTTTAAATCCTGGGACCATTTGATTTTCA<br>ACAGAATTGCTATGCTCCATTCCAATCTG   | T         | C       | TCAGATTTGGGTAAGATGAGGTATTTTCTTGGT<br>ATTGAGGTAGTTTCAGTTTGTGGCGGCATATTC<br>ATCAGTCAACAGAAGTATGTGACAGAAGTAGTG<br>A                                                                                                                                                                                                                                                                                           | NA                         | NA                          |
| Ca-II-SNP1428 | 87.18                  | Ca- <i>desi</i> -LG(Chr)8 | 5125998                 | GCTTTGTTAAGCTTATATACCTTATGCTCCTCATC<br>CTTTATTTTCATAACCCCTTGGCTGCTCCACGTACA<br>CATCTCAACTAACTTCCCATGAATAAAGG | A         | C       | AGAAGTATACGCTCCTGTAGCTCGTATGGACAC<br>GGTTTCAATGATTTTGGCACTTGTGTCACAAAG<br>AGCTTGGTGTGTTTTCAGATGGATGTGAAGT<br>CA                                                                                                                                                                                                                                                                                            | NA                         | NA                          |
| Ca-II-SNP1429 | 88.07                  | Ca- <i>desi</i> -LG(Chr)8 | 5199404                 | TTTATTAGACACATAAGGTGGATAATCTTCTTAT<br>ATAGATTTTCTTTATATAAGAGGTATAGATCAAA<br>CTTCTGACCACCTTGCCTAAGGTGTTTGA    | G         | C       | GTATTTGAAGAAAATAGAACGACAATTTTCTTAT<br>TCTTATATACAATGTGATATGATTTGTAGGAGA<br>CTCTCAAATTAATATATTTGAGTGGTAAGGGA                                                                                                                                                                                                                                                                                                | NA                         | NA                          |

| Marker IDs    | Genetic positions (cM) | Chromosomes               | Physical positions (bp) | Flanking sequences/Forward primers                                                                           | ICC 12968 | ICC4958 | Flanking sequences/Reverse primers                                                                                                                                                                  | Annealing temperature (0C) | Amplified Product size (bp) |
|---------------|------------------------|---------------------------|-------------------------|--------------------------------------------------------------------------------------------------------------|-----------|---------|-----------------------------------------------------------------------------------------------------------------------------------------------------------------------------------------------------|----------------------------|-----------------------------|
| Ca-II-SNP1430 | 88.96                  | Ca- <i>desi</i> -LG(Chr)8 | 5205782                 | GGAAGAAGCCCTTACCTTAATGTTAGCTTCAACGT<br>GGTTTTCCGATACCGCGAGTAAAGCCGGTAAAT<br>CTTTGCTCGCAACGTCGCCTCCAAATTGGTC  | T         | C       | TTCTTTTTTTTTTTTTTGTTCATTGTGTGAGGG<br>GACATTTTATTTTACAATAATGTGTTATTAGCCT<br>TATGCTAATTTCAATTTACACCTACCACAGTTT<br>GGACCTTTGGTTTCAATTTTCCCTTTTTTGAT<br>GAGTAACATAGATGGTATAAGGCTGTGTTAGTT<br>TGCTATAAAT | NA                         | NA                          |
| Ca-II-SNP1431 | 89.85                  | Ca- <i>desi</i> -LG(Chr)8 | 5236445                 | GGGAACCCTTCCTAAAAGCTAGCTACCAAGAGG<br>GAAGAACCTGGTCAATTAATACTCCGCTGAACAT<br>CCCATACTACTCGATGTGGGACTTGGGCACC   | C         | T       | CTTCAATCAAACATGCCATCACAAGTGGTACA<br>TTGGTATTGTAGCCTAAATGCTGGTTGGTTTC<br>ATTGTATCAAATGTTAGGGAATGGGTATTAT<br>G                                                                                        | NA                         | NA                          |
| Ca-II-SNP1432 | 90.74                  | Ca- <i>desi</i> -LG(Chr)8 | 5462785                 | GTTAACATCACTATACACATATTGTAATAATCTTTG<br>TCATACTATTGAATACTATCGATATATCTCTCATTT<br>TATTTTCTGTTTTGTTGGTTCAACTAT  | G         | A       | AATCGATGAAAATAGATAAATCAAACCTGTAATT<br>GAACCATTAATAATTTGAATTTTATTCAAGAT<br>GAATGTCATAAATCTGACGCTATGTTGAGAAG                                                                                          | NA                         | NA                          |
| Ca-II-SNP1433 | 91.63                  | Ca- <i>desi</i> -LG(Chr)8 | 5519042                 | TAATTAATTTGATTTGATATTGTTTTTTTCTCTT<br>ATACTCTTATCTAAGAGTATTTTGCGAATAGTTC<br>GAATATTTACTTAAGAGAATATTGATGT     | C         | A       | ATAATTTAATGTGAAAAATATATTTGTATAATG<br>AAAACGTAAAAATAACAATGAATTTTATAGAAC<br>ATAGATATTTCTTAAAGGTTCCACAACCTCAGG                                                                                         | NA                         | NA                          |
| Ca-II-SNP1434 | 94.30                  | Ca- <i>desi</i> -LG(Chr)8 | 5573153                 | ACAGAGTAACTTGACGGGAAAATTTGTTAATTTCT<br>TAGGTTGTGAACAACAGCTTGAATCCTGTTGGAA<br>TCAAACATTTGACTTTGTAGTTGAGGATGG  | A         | C       | AAAAAAGGCAATCTTAGTAACTAATCAATATG<br>GTGCAAAATTTATTACCTTTCCAAAAGTGTGCT<br>GGTCATAAACTTCAACAAGTAGCATTTCATGTA<br>A                                                                                     | NA                         | NA                          |
| Ca-II-SNP1435 | 95.19                  | Ca- <i>desi</i> -LG(Chr)8 | 5612410                 | GAGAATTTTCATTTTAGTCTAGTTTGGAGTTTATT<br>CTTATAAAGTGTCAATTTAATGATGTGAAATTTCT<br>TTTAAGTATGTGTGACATTGTTGATTTG   | A         | G       | GACTAAAAATAGTGGACCACAAGATCGGTTACA<br>ACCTCTTTTTTTCAATTTTCATTGATCAAATGT<br>AAATTTATGCTTCTAAAATCAACTGTTTTGGT                                                                                          | NA                         | NA                          |
| Ca-II-SNP1436 | 96.08                  | Ca- <i>desi</i> -LG(Chr)8 | 5663720                 | CTTTGCAACCCACGGTGGTCTCCTCTTCAAATCT<br>AAGATTTGGTACAAGAGAAGAGCTTCGTCCATCCA<br>TCATCGCCGCCGCCCTTCTACCTTACCAAC  | G         | C       | TAGGGAGGGAGAGAGACAGAGGGAGGGGA<br>TGAAGAGATAAAAAATAAAAAACAATAGAAAAATA<br>ATTGCCATCAAACATAAAAAAGAGAGAATCC<br>AC                                                                                       | NA                         | NA                          |
| Ca-II-SNP1437 | 96.97                  | Ca- <i>desi</i> -LG(Chr)8 | 5676823                 | AGAATTTGCCATTGGTACGACATGTTGCTTTTTTC<br>ATTCATTTCTTTCTGCATCAGTCGTCGTCTTACAA<br>ACTCCATCAATTATATAAATGAACCAATTA | A         | G       | ATTTTTATTGCGATTGGATATACATTTTTTTA<br>ATTAAGGTTGCCAACTCAATGGTAGAATTCGG<br>ATTTGCAACTATTTTTTACACATTTCTATGAA                                                                                            | NA                         | NA                          |

| Marker IDs    | Genetic positions (cM) | Chromosomes      | Physical positions (bp) | Flanking sequences/Forward primers                                                                           | ICC 12968 | ICC4958 | Flanking sequences/Reverse primers                                                                              | Annealing temperature (0C) | Amplified Product size (bp) |
|---------------|------------------------|------------------|-------------------------|--------------------------------------------------------------------------------------------------------------|-----------|---------|-----------------------------------------------------------------------------------------------------------------|----------------------------|-----------------------------|
| Ca-II-SNP1438 | 97.86                  | Ca-desi-LG(Chr)8 | 5705748                 | TCTAGGGTTGGTCTTAAACACTATTTAGTATAG<br>TTTTATTTTGGTTTTGCTTCTTTTTTTTCCCTTCTT<br>TTGTCTATGCAAGTTTTTTTTTAATAGA    | T         | C       | TTGGGATATGAATGAATTACATGCCGGAAGTCT<br>ATATTTCAATATCTAACATTAGTATTTTTTTCTC<br>CCTGTAAAATATATACTAACTATAATAATATTC    | NA                         | NA                          |
| Ca-II-SNP1439 | 98.75                  | Ca-desi-LG(Chr)8 | 5715980                 | CGAAATCTTCCCTCTTTGCCCTCAATAATATCTGA<br>AAACGATTTGCAAACCTTATATGATTGTCCTCAT<br>TGATTGTCGCGGATTCCATTATCAAGAA    | A         | G       | ATTAATGATATCATCTAGTAATCGAAAAACCT<br>ATTCGTAACATGTTTATATTTTGTATAGAATGA<br>GTATCTATTTAATTTTCTTAATAGAAATTACA       | NA                         | NA                          |
| Ca-II-SNP1440 | 99.64                  | Ca-desi-LG(Chr)8 | 5741859                 | ATAAAGCAGTTTGCTTAATGTATTATTACATTGCT<br>TGGGGTATTCCTCTCTGGTTACAGGTTTGCAGAA<br>GCTTACCACATTAATGTTGAAGGATGCA    | G         | A       | AGAACAAAAAGTTGATGTCTAAAATCAAGAAA<br>AAATTAATAAGAGAATGAAATGAGAATTTTTTA<br>CCAGAAATATACTCAAAAAATGCAGCAGTAATA      | NA                         | NA                          |
| Ca-II-SNP1441 | 100.53                 | Ca-desi-LG(Chr)8 | 5885427                 | CATCACTTCACTCATCAGTGCATGCCACATTC<br>CTGGCTTCCAACCTCCAACATACACTCTTTTCAT<br>TATATTTATCTTTATGGAATGGCAAATC       | C         | T       | TTGCGTCTCAGTTACAGAAGAGCTTTTTTTACC<br>TTTGATTCCAATTCAAAACATAACAAGGCTAAAC<br>TAATTCATCCTTGTGTGCGAAATTTCCGGAAT     | NA                         | NA                          |
| Ca-II-SNP1442 | 101.42                 | Ca-desi-LG(Chr)8 | 5919381                 | TCTCTAAGTTGCTTTTAAAGCCCAAGAAAACCAT<br>ACCATCTATGCTATCTAGATGGTGTATTATGCCCC<br>AACCATCTCTCATTTTTTCTATGTTGTTTT  | T         | C       | GTTTTAAATAGAGACTCTAAGAAAAGTCACTTT<br>TACAATTTAGGATAAAGTCTTCATTTAACATTTG<br>ACCTTTTTCCAACTCTATCAATCAACTCTTT      | NA                         | NA                          |
| Ca-II-SNP1443 | 102.31                 | Ca-desi-LG(Chr)8 | 5943582                 | TCCTTTTGGATTAATTTATATCCTTTTCTCATTCTT<br>TCAATATAGAATTTATTTCCACGTTTTCTATCGAGA<br>TTAATAATAATAAGCATATCTGTTACAT | C         | T       | TTTTGTTGTACACCGACGGGAAAAATTTAATA<br>AGAAACTCATCCATAGAAGTAACCTCCTCTGTT<br>AACCATGGCACATGCATCAATTATCCAATAAAT<br>G | NA                         | NA                          |
| Ca-II-SNP1444 | 103.20                 | Ca-desi-LG(Chr)8 | 5966950                 | AAATTATTGGGAATAAGAGTAATACTTTGTTTTGG<br>AAGGATTCATGATTGATTGGTGGGTCTTGCGTG<br>AGAAATTTAGTAGATTATTTAATTTGCTTT   | G         | A       | ATTTCTCCTCCCACGCAAACTGTCTTCGCC<br>ATCTCCGTCATTGAATACCCTCCCGTCAACA<br>TCTCTACCATAACCTCTACATTTTCTCTTGTG           | NA                         | NA                          |
| Ca-II-SNP1445 | 104.09                 | Ca-desi-LG(Chr)8 | 5967238                 | GATCATATTCGGTAAATGAGGCATATTCTGTATTA<br>CGGGAGGAGTTTGTGCTAGTATCAACACCTC<br>AATTTCAAGACCTAGTGTGACATCCTTTTGT    | C         | T       | TTGATCTTCGCAAAATGATACCTCGACGAAA<br>TAAATTTCTTTTGTAGGCAACCTATGTTAAAC<br>AACCTCCACAAAATATGATATTTTTTGTCTTG         | NA                         | NA                          |



| Marker IDs    | Genetic positions (cM) | Chromosomes               | Physical positions (bp) | Flanking sequences/Forward primers                                                                          | ICC 12968 | ICC4958 | Flanking sequences/Reverse primers                                                                                                                          | Annealing temperature (0C) | Amplified Product size (bp) |
|---------------|------------------------|---------------------------|-------------------------|-------------------------------------------------------------------------------------------------------------|-----------|---------|-------------------------------------------------------------------------------------------------------------------------------------------------------------|----------------------------|-----------------------------|
| Ca-II-SNP1446 | 104.98                 | Ca- <i>desi</i> -LG(Chr)8 | 6009417                 | GCGTGTGAGAGTGCGTGTGACGACTTCTGGTGAC<br>ATGTTTTCAGGCGTGGCTGATCTAGATAGAACG<br>AAGCTTATGGAGAGATTGTTCTCTGGAAAAGC | T         | A       | AAACAACCGTTATTTGTTTTGTCAACCCTTTTT<br>CAGCACTCGTTTTCAACATTTTCTGTCCAGATCC<br>ACTGCTATCACCATCGTACCCTTGTTCGGAC                                                  | NA                         | NA                          |
| Ca-II-SSR427  | 105.87                 | Ca- <i>desi</i> -LG(Chr)8 | 6012940                 | ATTGTGGCACTAGTGGAGGG                                                                                        | (TA)11    | (TA)9   | TCCATGTATGGTTTGTATGGTCA                                                                                                                                     | 59.99                      | 182.00                      |
| Ca-II-SNP1447 | 107.65                 | Ca- <i>desi</i> -LG(Chr)8 | 6026460                 | TTGACATTAATTACATTTGTGGTCCCACTAATTGT<br>GGTCTCCCTTTATACCTTATGGTGGTCAGATGAG<br>GTAGAAATTTTTAGATCATTAGTGATGGA  | A         | T       | GGAATTGCGAATGAGAAGTTGGAATCTGAAG<br>TAGCATCTAAATCTAAACCCTTGGAAATCGGGTG<br>GAATACCTCTTGTTCGAAGTGAGCGTCTGATGA<br>CTACAGGGGTTCCGTTTTAGTTTTTCTCCG<br>ATTTCACTG   | NA                         | NA                          |
| Ca-II-SNP1448 | 108.54                 | Ca- <i>desi</i> -LG(Chr)8 | 6094120                 | TAGCTTGAGTTTCAAGAATGATGATTGTCTCCTCG<br>TTTACTTGGGCTATGGCTTAAGTTCTGCACAAAG<br>TTCATGTCAGTGTAGAGTTTGGGGTTCGAG | A         | G       | CCAATGTGAACATTAAGAAAGGAAGTAGTGAAA<br>AAGTTCTATTGTTGATCAGAGATTTCTCTATGAA<br>AAATGAATCGGGTTTTGAAAAGAGGAAGCAGT                                                 | NA                         | NA                          |
| Ca-II-SNP1449 | 109.43                 | Ca- <i>desi</i> -LG(Chr)8 | 6234529                 | ACACTTGAAGATACATGAGCAGAACTATCTGATTC<br>GTTATTTAGAATTTAGAGTAGTAGTTTTCTCTCTCT<br>CGAGATTTGGAGTCACTATTACTCCAAT | G         | C       | AATGCAGTACAATCTGATAAACTACAAGCATAA<br>TCAATACTACCAGGCAAATAATGCAAATCAGTA<br>ACATCAGGATCCAATATACACCATTGTTTTCCC<br>AAATATTTACACCTTCAACAGCTACAAGACCT<br>TTATTACT | NA                         | NA                          |
| Ca-II-SNP1450 | 110.32                 | Ca- <i>desi</i> -LG(Chr)8 | 6328459                 | ATGTCCTCATCATCGTCTTTAATTTCTCCTTGAA<br>GCTGTCCGGTCAATCCTCTCTAGGGATTTCATCG<br>CGAATGATGTAGAAGTATCCGTGTCATGTGT | A         | T       | TTTTAATTAATTAATTTTATAATTAATAGTGAT<br>TTATTTCTTTAATTTTAAATTTTTCAGTGGACG<br>CACGAGGAAGAGACAGCAAAATCATACGAAT                                                   | NA                         | NA                          |
| Ca-II-SSR428  | 111.21                 | Ca- <i>desi</i> -LG(Chr)8 | 6423497                 | ACAGCTAAGCAATGAATGCG                                                                                        | (AG)11    | (AG)12  | CTTCCTCCGGTCCATTGTAA                                                                                                                                        | 59.09                      | 167.00                      |
| Ca-II-SNP1451 | 112.99                 | Ca- <i>desi</i> -LG(Chr)8 | 6440897                 | AGTATCTTTGTTAAGAAGCTCTTTGTGTGGCTT<br>TCAATTCACCTCAAACATGCGAAAGCTGATCCCGA<br>ACTTTCACAGTTTCTAATTTAAGATCAGTC  | T         | A       | ACTTTGTTGAAAACCTCTGATATTGAAAGAAAC<br>AAATATGTGACGAATGTTTCGAGGGTAAAGCT<br>AGCAAAGACGAGCTTGAATCAATGACAAAAGAG<br>A                                             | NA                         | NA                          |

| Marker IDs    | Genetic positions (cM) | Chromosomes      | Physical positions (bp) | Flanking sequences/Forward primers                                                                             | ICC 12968 | ICC4958 | Flanking sequences/Reverse primers                                                                                | Annealing temperature (0C) | Amplified Product size (bp) |
|---------------|------------------------|------------------|-------------------------|----------------------------------------------------------------------------------------------------------------|-----------|---------|-------------------------------------------------------------------------------------------------------------------|----------------------------|-----------------------------|
| Ca-II-SNP1452 | 113.88                 | Ca-desi-LG(Chr)8 | 6469017                 | ATTTCTACGAAAAAATGTGTTTTTTCCTTAGTCT<br>ATTGTGGGTGTTCTTTGTTTTTGGGATCTAGCTT<br>TCTCATCATATAATGTTCAATTTTGCTAG      | T         | C       | CAGTTACACCCCAAAAAAATAATCTTTGAATGT<br>GAATTAGTATTTTTTAACTAAGTTCGGGTAGG<br>TTTCTTGAATTAATAAATAAAACGAGTCTT           | NA                         | NA                          |
| Ca-II-SNP1453 | 114.77                 | Ca-desi-LG(Chr)8 | 6491984                 | CCATTTTGTTTCTCCCTGTTTTGGTCTCCAAACA<br>GAATTTTGGTCCAAACTTGATGAAATTTCAATTTT<br>TTTGCATTTATTTAAGTCACACAATGCCT     | T         | C       | AATTTTAGTCCAAACTTGATGAAATTTATTTT<br>TTTTAACTTGTACTACCCATTTATGGTCATAT<br>ATTTTCGGGTACAATTTGTGCAATGAGATCTT          | NA                         | NA                          |
| Ca-II-SSR429  | 115.66                 | Ca-desi-LG(Chr)8 | 6529039                 | GCTCGTATATTTGTTGATTTTGG                                                                                        | (AT)7     | (AT)11  | AATAAGTTGCAAATCTTCATAGGATAA                                                                                       | 59.02                      | 142.00                      |
| Ca-II-SNP1454 | 117.44                 | Ca-desi-LG(Chr)8 | 6641248                 | GGAAGAAGCCCTTACCTTAATGTTAGCTTCAACGT<br>GGTTTTCCGATACCGCGAGTAAAGCCGGTAAAT<br>CTTTGCTCGAACGTCGCCTCCAATTTGGTC     | C         | T       | TGAGATTTAAACGCAAACCCCTCCGTTTCTTCT<br>AGATCCAAGCTTCATTTTCGCGAAGAGTTAGAAG<br>GGAAAGTTGCTCACTACCACGCCACGGTGCTA<br>GG | NA                         | NA                          |
| Ca-II-SNP1455 | 119.22                 | Ca-desi-LG(Chr)8 | 6673883                 | TCATTGGATTAATATATCTGGATTATGCCTCTGA<br>GAAGATGTAGTTGCATATGATTGACGGTAAATG<br>ATATCTGCTTTTGTGAGAGATGGCACGCA       | G         | T       | GGTGTA AAAA ACTCTCCAGTACATGAGATGCTC<br>AAAAGACCCCGACGTCGTCAAGAGTAATAGT<br>CATTTCACTGAATGGCAGGTGAAATGAACTAGT<br>CT | NA                         | NA                          |
| Ca-II-SNP1456 | 120.11                 | Ca-desi-LG(Chr)8 | 6674022                 | ATTACTTTGACGACGTCGGGGGCTTTTGGAGCA<br>TCTCATGTA CTGGAGAGTTTTTACACCTCCTGCA<br>AATGTCAATGAAGATTTGGCAATTTGTGCTG    | T         | C       | AAAAA TACTCTTTCAACCACTCAAAC TATAC<br>GAGGCCCTCTATTGGTCTAGTCTCAGTGAC<br>AGCTTCATCATATGCAACTCCAACA ACTCAAC<br>A     | NA                         | NA                          |
| Ca-II-SNP1457 | 121.00                 | Ca-desi-LG(Chr)8 | 6675197                 | ATATGGGTGGTCTGAAGATCAGATGTGTGCTTA<br>TTAGAGAGAGCTTTATACATTTCTAGAGGAGGGG<br>ATTATCAGTAGTATTATAGTTGATTATTCA      | A         | G       | ATAATAACTCTGAATAATAAATAACTAACTAAAT<br>AAGTCTGAATAAGTCGCTAATACAATAAGTCTG<br>AATAACAAATAACTCGCGAATAATAAATAAGT       | NA                         | NA                          |
| Ca-II-SNP1458 | 121.89                 | Ca-desi-LG(Chr)8 | 6716647                 | CACGATAAATTACA ACTCAAGTTATTTTCATCTCATG<br>CTTGTTTCTCAATTCGATCAGCTTACCGACAGATT<br>CACGAAGCCTCTTGATCCTCAACCGTTCA | T         | C       | TTAGCGCAACTCATATATAACTCTAAAAATATTC<br>TCTAAATCATTTTTCTTCAATTTATTAAGTGCA<br>TGTAATAATGTCTAGTTTTGACGACAAATAC        | NA                         | NA                          |

| Marker IDs    | Genetic positions (cM) | Chromosomes               | Physical positions (bp) | Flanking sequences/Forward primers                                                                           | ICC 12968 | ICC4958 | Flanking sequences/Reverse primers                                                                               | Annealing temperature (0C) | Amplified Product size (bp) |
|---------------|------------------------|---------------------------|-------------------------|--------------------------------------------------------------------------------------------------------------|-----------|---------|------------------------------------------------------------------------------------------------------------------|----------------------------|-----------------------------|
| Ca-II-SSR430  | 122.78                 | Ca- <i>desi</i> -LG(Chr)8 | 6719856                 | AAATTGTTCTTTAAGTTCTGCACTC                                                                                    | (AT)11    | (AT)10  | CAATAATCTGTTAGGGTCTTTTGACA                                                                                       | 57.43                      | 124.00                      |
| Ca-II-SNP1459 | 124.56                 | Ca- <i>desi</i> -LG(Chr)8 | 6871710                 | TTGACATTAATTACATTTGTGGTCCCACTAATTGT<br>GGTCTCCCTTTATACCTTATGGTGGTCAGATGAG<br>GTAGAAATTTTTAGATCATTAGTATGATGGA | C         | T       | AAGAGTTGTACATGAGAGGATAAGATAACCAAA<br>CATGCTACTAAGGACAAAAAATATCCCGTATGGG<br>CTAGTTCATAGGACACAACTAATGGATCTATA<br>T | NA                         | NA                          |
| Ca-II-SNP1460 | 125.45                 | Ca- <i>desi</i> -LG(Chr)8 | 6879863                 | GTCTGAGCCTTGCTTATGATTAATTTTTAGGCTT<br>AAGCTTGGCCTACGGTCTAATATAGGTTTTTTTC<br>GGCATGACCTCTTAAAAGTCTGGTCTAGC    | A         | T       | TGGGGGGGACTACTTTCGCGATTGAGCTAAAA<br>TAGGGGGGACCAAACTGCAATTAACGTAATAA<br>TTTTAATATGAATAAGACTTTTAAATAGGCTTCC<br>A  | NA                         | NA                          |
| Ca-II-SNP1461 | 126.34                 | Ca- <i>desi</i> -LG(Chr)8 | 6883558                 | TTGCTTCTTCTTTGGTGACATCCCTCTTGCCCCC<br>CCGGCTGTCCAACCACTCCTGCGATTGTTGATC<br>CTCCTCGTTACCCCTCTCGTCATCATCTTCA   | A         | G       | TCAACTAAAAAACGAAAACGTTTAAATGGAAT<br>GCATCTTTGTGAGCAAATCAGCAATCTGTAAG<br>AAGAAGAGACAAACGGTAGAGTAATGATTCTAT<br>G   | NA                         | NA                          |
| Ca-II-SNP1462 | 127.23                 | Ca- <i>desi</i> -LG(Chr)8 | 6890882                 | GATTCCTCATGCATGTGAATATGTGATTTTTAATT<br>GTAAATTAGTCTTCATAACAGTTTTTTTACTGTT<br>GAAAGTTGAAAACATTTGGTTAATTACT    | T         | C       | TTCAAAGGAAAGTTCCTTGATTCAATTCCAAAA<br>GTATCAGCTGTAATTGTGCAATGACTGTGACA<br>AAATCCAAAATAAAAAACAATCAAAATATGT         | NA                         | NA                          |
| Ca-II-SNP1463 | 128.12                 | Ca- <i>desi</i> -LG(Chr)8 | 6900162                 | TCCACGCATCGCATGCCATGTTGTTTTTTTGTGTC<br>TTTTTCGTTTTATTGCAACATATTTGAAAGGAACAA<br>CAGAAATGAATTTGTACGAAGCTTCTTTA | G         | C       | AATTATACTTTAATTATTCATGACCAAAATTTAA<br>ATTATTAGAATCATATATATAAAAGTGTGTGTGT<br>GACCATGTCCCAAAGTAAACAAGATGGATGCCA    | NA                         | NA                          |
| Ca-II-SNP1464 | 129.01                 | Ca- <i>desi</i> -LG(Chr)8 | 6901022                 | TCAAGAGCATGTTGATTGGCTCTACTTAAATTATG<br>GTAATCCTTTGTCTTTAAGTTTGTGCGATCTTTC<br>TCTAATTTCTATATAGGTTTGAAAAACC    | T         | C       | CTTAAGAAACGCCATTGACATTTTAAATTTCTT<br>TTTTAGAAATATTAAGACACTTTTTGAAACGTC<br>AATGAGATTATTTAATATAAAATTCAGCACAA       | NA                         | NA                          |
| Ca-II-SNP1465 | 129.90                 | Ca- <i>desi</i> -LG(Chr)8 | 6906044                 | GACACTTTGTTTGTGGGGTCTACTTAAGATTTT<br>GGGTCTTATGCGATTGATAAATTTATATCCATG<br>TCTAAATGTAGATAATTTTTAACATAAAA      | G         | A       | TACATGTTCTAGTAAATAGATACATGTATAACTA<br>ATTTTGCTATAATTCATTTTGTATTTGGTTTAA<br>TATGAATTTTTCAACTTATATAATATTTAA        | NA                         | NA                          |

| Marker IDs    | Genetic positions (cM) | Chromosomes      | Physical positions (bp) | Flanking sequences/Forward primers                                                                            | ICC 12968 | ICC4958 | Flanking sequences/Reverse primers                                                                           | Annealing temperature (0C) | Amplified Product size (bp) |
|---------------|------------------------|------------------|-------------------------|---------------------------------------------------------------------------------------------------------------|-----------|---------|--------------------------------------------------------------------------------------------------------------|----------------------------|-----------------------------|
| Ca-II-SNP1466 | 132.49                 | Ca-desi-LG(Chr)8 | 6914175                 | TTTGGTGGTTCGTTATGCTCCCACTAAGATAGTT<br>ACATCATCTACGAAACCCAACTCATTGGCCCTAC<br>TTTATAGTCAATTGATTGACTCGTTATAAA    | A         | T       | TTTTTACATTTAAAATGTATAACAATTAGACTCC<br>ACATTTCTATTAGATGTGCAATGTTATGGAGA<br>AAGTAAGTTTACATTTTGAAAAATAAACTCAAT  | NA                         | NA                          |
| Ca-II-SNP1467 | 133.34                 | Ca-desi-LG(Chr)8 | 6919957                 | TGCAGTTTTGGTCCTCTTATTTAGTTGAATCGTA<br>AAAATAGTTTTTTTTTTTTCCAGTTTGATCTCCG<br>AATAAACTTTTGGTCCAAAACCTTGATGAA    | T         | G       | CGTTTATTTAAGTCACATCATACTCAAGATCTC<br>ATGACGCAACAATTATATCTGAAATATATGATTA<br>TAAATAATGTGGTGTGACTTGAAAAAATGAAA  | NA                         | NA                          |
| Ca-II-SNP1468 | 134.19                 | Ca-desi-LG(Chr)8 | 6931424                 | TCCTTTTTTTTTATTTCCCTAAATGCCCTAATTTA<br>AAAATATTTCTCTAAATGTCTTATTTTTTTTTAA<br>GCAGGAAGTCGTTCTTTGAGGAAGCGAC     | C         | T       | CAAGAAATAATTAATGGTATCATTGGCACTTAG<br>GATATGAAAAATTTGGAGGTTTTTTTTTATCAAT<br>ATATCCCTTTTTATTTATTTATCGTCTTCAAGT | NA                         | NA                          |
| Ca-II-SNP1469 | 135.04                 | Ca-desi-LG(Chr)8 | 6945723                 | TGCGGCACCTTTCTATATTATGATTCAAGTTTAGT<br>GTTTACGACGTACAATTTGTGTTAAATGTTTCAG<br>GCTAGTTTACAAGATTATGAGTCATACTTA   | C         | T       | AAAATAAATATCTTTTCAAAAATATATTTAAAT<br>GTTCAAAAAGTTAGAAGAACAAACACGTACAAA<br>TTTTTATCTTTAAAGTATGACTAAGGATTGTC   | NA                         | NA                          |
| Ca-II-SNP1470 | 135.89                 | Ca-desi-LG(Chr)8 | 6954083                 | ATACGCTGCGTGCCAACATAATCAATACACAGTG<br>GATGCTTTTATACACTGTGTGGCCTCATTGACAC<br>AACCATTATACAATTTCTACACTTCTTTGTA   | T         | A       | CACAATGAGGTTTAAATCATATGCAATCTTAACA<br>ATGAATAGGCGAAAATACTAAGAAATAAATCTAC<br>TTTTTTTTAAAGAGTTTACAATTGTTCAAAGT | NA                         | NA                          |
| Ca-II-SNP1471 | 136.74                 | Ca-desi-LG(Chr)8 | 6955563                 | ATATGAGCCATACTTAATATCTCAGATATAGTTTAA<br>AAAATTCATTGTGTACATATTTGTTTTCCCTAATTT<br>TTCATTTTCCCTAACATGTTTTGTTTATG | G         | T       | AATGCTTGGAAATAACTCTTTTTTCTATGCTCT<br>TAAATTATGCTATAGATTCAAAGGATGAAATCT<br>ATCTCTAGAAACTATAAAAAAATCCTGTTGG    | NA                         | NA                          |
| Ca-II-SNP1472 | 137.59                 | Ca-desi-LG(Chr)8 | 6957824                 | AATCATCACTGTTTTGGGAATCCAGTGACCAACA<br>CTGATCAAAATCAAACCTGTTGAGTTGGGGTCTG<br>TGGGCTATATCTATGAATGTTGATTTATGA    | G         | C       | TTTTGTTTCTTGTTCTTGTCCCTTTACTATAA<br>CTAAGCAAATTTATGTTTTGTCTTCTTTTTCCCTC<br>AACGAAACTACTTTAATAAATTTCTACTTTTC  | NA                         | NA                          |
| Ca-II-SNP1473 | 138.44                 | Ca-desi-LG(Chr)8 | 6960219                 | GAGTTACTTATGATAGGGGATTTGAAATGGCTATT<br>TGAAGATCCAGTTTCATTTTTACCTTTACAGTTTAT<br>TTTTTTAACTAAAAGCTATTTGCGCATA   | T         | C       | TCTGTTATCCGATACAGTACCTTTAGAAAAACA<br>TTTATCGAAAAGAGCTCAATCATATATAAATAAT<br>TACAATTAGTTCAAAGATTAATCTCTATTATT  | NA                         | NA                          |

| Marker IDs    | Genetic positions (cM) | Chromosomes      | Physical positions (bp) | Flanking sequences/Forward primers                                                                         | ICC 12968 | ICC4958 | Flanking sequences/Reverse primers                                                                             | Annealing temperature (0C) | Amplified Product size (bp) |
|---------------|------------------------|------------------|-------------------------|------------------------------------------------------------------------------------------------------------|-----------|---------|----------------------------------------------------------------------------------------------------------------|----------------------------|-----------------------------|
| Ca-II-SNP1474 | 139.29                 | Ca-desi-LG(Chr)8 | 6961782                 | AGAACACTTGTCTGAGTTGTCAGTGTATACGAGT<br>GTCGTACAAGTATCAAACGCTGACACGTGTTAGA<br>CGGGAAACAGCCTAATCTCGGAGATGCTGA | G         | A       | CTGTTTATCTCTCCCAACAGGTTAGTTTTTTCA<br>GTTTGATTGAACCCCTTTAACCTGTTTGATGAA<br>TTGCCTGATATGACACATTAATCTAATGGCTG     | NA                         | NA                          |
| Ca-II-SNP1475 | 140.14                 | Ca-desi-LG(Chr)8 | 6964897                 | TCATCATGGAGTTCAACACACTCCCAAAAAAGGA<br>TTTTAGAGCAGGAAGGCTGAGTTGTATCCAGAAT<br>CACTGATTGCTTGCTCGTGGTACCAGGTC  | C         | T       | CAATGGCCACGCACCTCGTGGTGTGCAAATA<br>GGAATGCATTAGCAGTCTTGTGGAGTCGTTGC<br>TACCGTGGTAACTTACGAGGATAGGGAGGAT<br>GGT  | NA                         | NA                          |
| Ca-II-SNP1476 | 140.99                 | Ca-desi-LG(Chr)8 | 6968877                 | TTTAGAACCTGGTTCGGGTTGAGAATCGTGGT<br>CGTTGAGGAGATCGAAGGGTTGATTGAGGAAGG<br>TGCAGTTGAACCTTCTTCTCCTCATCATTTT   | C         | T       | AACTCACAAAACGATGTCGGGTCGATTGGTGA<br>AGAAGATTCTGAACAAACAACACTTTCCTC<br>ATCAACTCATCAAAGAAGAAGAAGAAGATG<br>AT     | NA                         | NA                          |
| Ca-II-SNP1477 | 141.84                 | Ca-desi-LG(Chr)8 | 6971496                 | ACACTTGAAGATACATGAGCAGAATCTGATTC<br>GTTATTTAGAATTTAGAGTAGTAGTTTTCTCTCT<br>CGAGATTTGGAGTCACTATTACTCCAAAT    | T         | C       | ATAATTTAGGTATCCATTCATCTATATTTCTC<br>ACATTCAAATCCTTTTGATTGAGCATGCAATGT<br>AAACTTTTATGATAGTTGAATACTTCAAATTGT     | NA                         | NA                          |
| Ca-II-SNP1478 | 145.24                 | Ca-desi-LG(Chr)8 | 6972137                 | TCAGATTTAAATATGCCTTTGCTCCTTAAAAATATA<br>TCACTTTTGATGTTTGTATCCTAAGTTTTTTGT<br>TTGAATTTAGTCACTAAATAAGAGACC   | A         | G       | TTAGGGTTTTTAAAGAAATTCGCCTTCTCCGT<br>GCCGGTGCAGTTTGTAACTCTTTTTGTATG<br>TAGCTTTGATATGATTAAGGACAAAAACCA<br>A      | NA                         | NA                          |
| Ca-II-SNP1479 | 146.09                 | Ca-desi-LG(Chr)8 | 6978739                 | CGCACATTGTGCACCGCATATAAAGTCGAGCAA<br>CATACTCCTTAAACGAGAAGTTTGAAGCAGTGTG<br>CCGATTTGGGGTGTGCGGGTATTCTTCC    | A         | G       | TGTACACATCTCCTCTCAGAGTAGCCACCCATG<br>CTTGTCCGTACTCCGGAGGAATGTAACTAATG<br>TACCTACAAGTTCTGTTGTACATGAGTTTGAT<br>A | NA                         | NA                          |
| Ca-II-SNP1480 | 146.94                 | Ca-desi-LG(Chr)8 | 6979516                 | ATATCTTGTTAAGAATACAGCATTTTCAATTCTT<br>CTTGTTTTACTTCTCAATCTTAATACAGCAATGCTA<br>CAACTTACTGACTTTTATTATTGCCATT | C         | T       | GAGTCTGAGCTATAAACACAAAATTTGACATGT<br>CTTTTCCTTTTGAATTAAGCTATACATACTAAC<br>TATAATTTAAAGGGATTACATTTAGTAATGT      | NA                         | NA                          |
| Ca-II-SNP1481 | 147.79                 | Ca-desi-LG(Chr)8 | 6982315                 | GTCAGATGGCATATCTACGGATCCTTGACAATCAC<br>CTCCATTCTCCTCGGAAACAACTTGAACATAAT<br>TCTAATTTTTTTGTTCAAATTTATCTGTC  | G         | A       | TATTTATTTAGCCCTTGTCTTTTGTGCGCATCTT<br>TAATTGAATTGGCTCTACCTTTACCTTTTCTAAC<br>AGTTATTTATTTTCTGATATATTCAAATGTGA   | NA                         | NA                          |

| Marker IDs    | Genetic positions (cM) | Chromosomes      | Physical positions (bp) | Flanking sequences/Forward primers                                                                           | ICC 12968 | ICC4958 | Flanking sequences/Reverse primers                                                                                  | Annealing temperature (0C) | Amplified Product size (bp) |
|---------------|------------------------|------------------|-------------------------|--------------------------------------------------------------------------------------------------------------|-----------|---------|---------------------------------------------------------------------------------------------------------------------|----------------------------|-----------------------------|
| Ca-II-SNP1482 | 148.64                 | Ca-desi-LG(Chr)8 | 6984120                 | TCACAATTTCTTTTGTATTTCAGACTTTCTTTTG<br>TACTTTAAGGACTCCCAATGTGCCTTCAGTTGAGC<br>CCATACATCCTCTTCCATCCAAATTGGTT   | G         | T       | GCCACCTCAGCATAAAGACATGGTGCGGCGTA<br>ACTTTGAGAAAAGGGTTTCAAGCTAAAATGATTCA<br>AATTAATGCAAGAAGCACGGAAAAATTTAGATCA<br>AA | NA                         | NA                          |
| Ca-II-SNP1483 | 149.49                 | Ca-desi-LG(Chr)8 | 6990174                 | TTAGTTGGGGATATATGGTGGATCTATAATTTTT<br>TTGATTTTGTGGAAATATTTTATGGAGTTTGTG<br>GGATATTGAAGAGTTTGATGGTTAGAATC     | A         | G       | ACACAAAATATGGTAAGTTAGTTATGCATTTTAC<br>TAAATTCACACTATAAAATTTGTAATAATTTACAG<br>ACATTTTTTAAATGTTGTGTA AAAAGATGCAA      | NA                         | NA                          |
| Ca-II-SNP1484 | 150.34                 | Ca-desi-LG(Chr)8 | 6993303                 | AGGTATCAGAATTATGTTTTGAGAAGTCATCAAA<br>GTATTTACTAGATACTATCAAACCTGTGAGTCGTC<br>TACCTTCCCTTTGGATTTTTGTGGATGGTT  | G         | A       | TTGTAACTGGATAGCAAATATACACATGAAA<br>TATAAACAATTTGTTGGCAAATCTATCATGGATT<br>ATTTTTCCCCAGTTCATATAAAGGGTGA               | NA                         | NA                          |
| Ca-II-SNP1485 | 151.19                 | Ca-desi-LG(Chr)8 | 7004534                 | TACCTCGTGTTCCTATGAATACCATGCAGTATTCT<br>GCTCCTAACAACAGTGGCCTTCCGATGCCTCCAC<br>CAAGACCACCAGGCATGCACATGATGCCATC | T         | C       | TCATATGATGCATTGATGGATGCATTGGAGGTG<br>GTTGACCAGCCATCATTGAATGCTGTCCAGAG<br>GACATTTGCATTGGAGGAGGGGGCGCTGGCC<br>GAAC    | NA                         | NA                          |
| Ca-II-SNP1486 | 152.04                 | Ca-desi-LG(Chr)8 | 7009241                 | TCTCAAACCTTTCCATAAATGACTCTCCTGTATT<br>GACGAAGATACAAATGTTTTCTTTAATTTGATT<br>CAGACTTTGTACGTAAGAATCTACTATTG     | C         | G       | AAAACTTATTAGTTAATTTTTTTTACAGTTAATT<br>ATATGTAAGTTATATACTTATTTTTAATATACAT<br>TTATTAGTAAGCTAATTAACAATGAGGGG           | NA                         | NA                          |
| Ca-II-SNP1487 | 152.89                 | Ca-desi-LG(Chr)8 | 7012940                 | TTACTTGTTCAGGGATCTCTTTCAATTTCTTAA<br>CAGGAGACCTCCCTCAAACCTATGAACCTCACTTCA<br>AGCATAACCACCATGTAATGTCCAACCT    | T         | C       | AAGGACATTAATGGTTCTGTAAAGTTGGTTGTT<br>TTGTAGATACCTACGCACACGTAACAAGTCAA<br>CTTAGAATGCAATCAATACCAATAATTAACAC           | NA                         | NA                          |
| Ca-II-SNP1488 | 153.74                 | Ca-desi-LG(Chr)8 | 7023172                 | CAATTATTTTCATTGGTACGATATCTTTCATTATT<br>TATTAGAGAACATTTTTCGTGATAAATTTGATTTA<br>TTTGAATTCGTTTCATATGATTTTTCAT   | T         | C       | TAAGTTAGTATATACAGTCTCCAACGATTATCTA<br>CAACATACCTATCAATAATATTAGAAAAAGACA<br>GAAATATAAAAATATGAGAGACTAAATCAAACCT       | NA                         | NA                          |
| Ca-II-SNP1489 | 154.59                 | Ca-desi-LG(Chr)8 | 7024894                 | AATATCTCAATTCAGACTAGACGAGAATATGTATA<br>CTTACCCAATGTGGTTCTTGAGAACAAGGCTTTCT<br>ATTTTTAGAATCTTTATGCTCAGTTTCTT  | G         | C       | TAAGAATCTGCTCGGTTTTATCTTCAATTTCTCA<br>GGGAAGTGAGAAGCTGCTTCAACTAGTCTCAG<br>ATAGTTGCAAGTCTTCCAACACTTATAAGGATA<br>A    | NA                         | NA                          |

| Marker IDs    | Genetic positions (cM) | Chromosomes               | Physical positions (bp) | Flanking sequences/Forward primers                                                                           | ICC 12968 | ICC4958 | Flanking sequences/Reverse primers                                                                              | Annealing temperature (0C) | Amplified Product size (bp) |
|---------------|------------------------|---------------------------|-------------------------|--------------------------------------------------------------------------------------------------------------|-----------|---------|-----------------------------------------------------------------------------------------------------------------|----------------------------|-----------------------------|
| Ca-II-SNP1490 | 155.44                 | Ca- <i>desi</i> -LG(Chr)8 | 7029788                 | TTCAAAACTCCTAACCTTGGGTAGATCTTTACTTT<br>TTTGAGATGAATAGTATAAATCGGACATCTTATCAA<br>TTTTTTGTGATGCACATTATCATATGATT | G         | A       | ATTCTAAAAAAAAAAGAATACTAAAACAAATCAT<br>TTACAATGCAATTACAAAATGATTTTAGATAAG<br>AAGATGAATTATATATGTTTATAACAAGTGGT     | NA                         | NA                          |
| Ca-II-SNP1491 | 156.29                 | Ca- <i>desi</i> -LG(Chr)8 | 7036172                 | TATGTTTGGTATCGAACCTCTGCGAACTACAAGTA<br>ATATTTGTCTAAAATCACCATCTATTACAACCTGGA<br>GTTCCACCAAATGGTTTGTGTTTGTGCT  | T         | A       | TCATGATGACTTAGTCCTTAATGTGGCCTTAAG<br>TGGTATTACATCATTGTTACTACCAGGCGGTCA<br>TACAACCCACTCTACATTAATATTCTGTTGGA<br>G | NA                         | NA                          |
| Ca-II-SNP1492 | 157.14                 | Ca- <i>desi</i> -LG(Chr)8 | 7037315                 | TCCATAATTTCAACGCTATTGCAATGAAGCACCAA<br>TTAACCTTTTGCCTGTTAACTTCGTCATTCTATC<br>GTATTTGGATTCAATTATGTTGAAATATTAC | T         | C       | TATTTATAACTTTATTCTATTTAGTGTGTTATT<br>GATTCTATTGTTCCGGTAAAAAGGTCCTACATAT<br>TATGTTATCTTTAACCCACTACACGTTTAGTT     | NA                         | NA                          |
| Ca-II-SNP1493 | 157.99                 | Ca- <i>desi</i> -LG(Chr)8 | 7043758                 | TACACCAGAATTTGTGGATACATTTGGTACATTTT<br>ACTCTTTAGTATGTGCAAGACATTTTGGACTTCT<br>TTGTTGTCAAACCTAACTCTTACAAGATA   | G         | T       | TTGTTAGATAAAAAATGCCTTACAAGTTATCAT<br>TTAACATCAATCTTATAAAAAATCTGGTTTGATA<br>TGTTTGCCTTTGTGTTTATTGTACTATTT        | NA                         | NA                          |
| Ca-II-SNP1494 | 158.84                 | Ca- <i>desi</i> -LG(Chr)8 | 7044735                 | TTGGTTTCTCATTGGCTGTTAACATTAATTTGTAAC<br>TTGTTGTAACCTTTAGATCGAAATGAATGAATT<br>TTATTATTTGCATATTGACCGCTGTTTG    | C         | T       | TTTTATTCCAACATAAAAAGTTGTGACTTTGATTT<br>TTAGCTTTCCAACGCCTGCTTGCATGCGTCAAT<br>ATGATATGCAGAACTCAAGTTATGACCTACAGA   | NA                         | NA                          |
| Ca-II-SNP1495 | 159.69                 | Ca- <i>desi</i> -LG(Chr)8 | 7045300                 | GGAATGCTTTATGCTATTTTATTTGATTAATTTGC<br>TGCCATATATATGTAGGTTTATATTGCGCGTATATT<br>ACTTGTTATTGTGTTTTGTGTTTATTC   | C         | T       | CAAGTTAATTTTTAATTCGTGACTCTATTCCTA<br>TTTGACTATAGAATTGATCAAACAAGTGAATTA<br>ATCCCATGTGAATTCGGTTTCTTTGACTGGAG      | NA                         | NA                          |
| Ca-II-SNP1496 | 162.24                 | Ca- <i>desi</i> -LG(Chr)8 | 7047467                 | ATTAGAAATAAACTGTGGACTATAAGTGGGTGTTT<br>AATGTGATTGCCCTACACCCACTGAATATGAAAA<br>ATGCTTTCTTCATGTATGATCCCCCAGCT   | T         | A       | CTTACTGGCTAGGTGAATTTCAAACCATTCC<br>CTGAAAGACTATTTCAAGCCACAGAGACTTC<br>TCCAATTTGCAAATCTGACCCAAAATTATCTTCA        | NA                         | NA                          |
| Ca-II-SNP1497 | 163.09                 | Ca- <i>desi</i> -LG(Chr)8 | 7049649                 | CGTATTTGATTAGTCTCGATGTTTTGTA AAAAGA<br>CCAAAAATATATCATTCAATGCCTTGCTTGCATTTA<br>TTTAGCGTTTTAAGCCAAAATATTAGTTG | C         | T       | GTCTGCCATCACCATTGGCTTTTGTTCCTTT<br>GTTAATGCACCTTGATCCATGAATGACTTTGAT<br>TCTATTTAGGCTCCTCTTCTCATCAGATATG<br>G    | NA                         | NA                          |

| Marker IDs    | Genetic positions (cM) | Chromosomes               | Physical positions (bp) | Flanking sequences/Forward primers                                                                           | ICC 12968 | ICC4958 | Flanking sequences/Reverse primers                                                                                | Annealing temperature (0C) | Amplified Product size (bp) |
|---------------|------------------------|---------------------------|-------------------------|--------------------------------------------------------------------------------------------------------------|-----------|---------|-------------------------------------------------------------------------------------------------------------------|----------------------------|-----------------------------|
| Ca-II-SNP1498 | 163.94                 | Ca- <i>desi</i> -LG(Chr)8 | 7061028                 | GGCGAGATCATATTTCCAGCTCAGATTTTGACTT<br>TGTCATGCGCAACCTGGTTGCATTTAAAGGGAA<br>AATACCCTATTTTCTAAATATATTCTTCATC   | A         | G       | AATATCAACACTCATCTTCATTAATCTCATCGCC<br>TCCTCCATCATTTCATTATCTCCTCCATCATCA<br>TCGTGAGAGGTAGAGAGGATGGTTGTGAGTCG       | NA                         | NA                          |
| Ca-II-SNP1499 | 164.79                 | Ca- <i>desi</i> -LG(Chr)8 | 7062955                 | TTATGATGAGGGTATGGAATTAGCCCGCACAAA<br>CTCCTAAGATAGTGAAGGCTCAATCTCAATATGA<br>GTAGTTTTGGTGTGCGCATCTCCTTCATATA   | G         | A       | ATTTCTGTTTATTTGTTTTGAAATAATATTC<br>GTGACAACCAGTAATCTCAGTTGCCTCACCAGT<br>AATCTCAATTGCCTATTTTCTTTATAGATTGCT         | NA                         | NA                          |
| Ca-II-SNP1500 | 165.64                 | Ca- <i>desi</i> -LG(Chr)8 | 7066214                 | ACAACAATCCATTTCAATTAGCCGTGTGTGATCTA<br>TGGGGCCCTACACCAGTTAAGTCCTCTGGTGGCT<br>ATATGTATTTTCTCACCTGTGTAGATGCTTA | C         | T       | ATTTTACAACGAATTGAAGTTCTACCATGGCT<br>TTGAATTGTGTAATTTGTGCTAGAGTATCAGAC<br>TCCAACTTTAAAGGATAAACCACAAACCTAG<br>A     | NA                         | NA                          |
| Ca-II-SNP1501 | 166.49                 | Ca- <i>desi</i> -LG(Chr)8 | 7067157                 | TTCTGACCCAAACTGCGATCCAGACCTGAAGCA<br>CGTGAGTCCAAACTGGAGCATCTGTCTCCAGAC<br>CTGAGGCATCTGCACCCAATCCTGTTCCCATC   | G         | A       | TTTATGCTGCGAGTTAGGAGCAAAATGGGTTG<br>CAAACGGGGTAGTATAATGCCATCCTTAGCTCT<br>AGTCCCCATTGGGTGAATGTTCTAGGATGTAT<br>CC   | NA                         | NA                          |
| Ca-II-SNP1502 | 167.34                 | Ca- <i>desi</i> -LG(Chr)8 | 7068247                 | TCTCACTTGTGAATCGGTTTGGAGTCAAGTAAAGG<br>CACTCTATACTAACGACACACAACGTCCTATGGA<br>GTTTGTACCGCTTGTGAATATCATTACT    | A         | C       | ACTGGATTACTTGCAGCAAGAGGGAGAACTTA<br>TTAAAGTAATGAAGTGGCTATGAACGATGCCA<br>AGATATGCAGAAATAGAGCCATCAAGTGTCTTC<br>G    | NA                         | NA                          |
| Ca-II-SNP1503 | 168.19                 | Ca- <i>desi</i> -LG(Chr)8 | 7677137                 | GGGGTGAAGATATTGATATGATATGTATACAATGT<br>ATTAAGTTTTTAAGTCAAGTTGTTGGTGTAGAGAA<br>GGCACCCCTACAGCTCTCCAGCACCCATGG | A         | C       | AATTTTTTATATATAATGAAAATAACAACATG<br>GTGACTAGGTAGCTTATCATTTTACTCCCTAGG<br>CCAAGCCAGGTTGAGTTTTCTAAAGCACTTGAA        | NA                         | NA                          |
| Ca-II-SNP1504 | 169.04                 | Ca- <i>desi</i> -LG(Chr)8 | 7749615                 | CTCAGTTCGGAACAACGCTCTCAACGTCTAGAAG<br>TACAATGAGACTTGGTGAATGTCTGGCTGTTGA<br>TCATGTGCAGGATTGGGATAGACAGGGAGAT   | A         | G       | TTTACAGTGGCACCTATTTCTTCTGTGCTGATC<br>TCATGCCGTACTCACTCACTAAACATAAGCTGG<br>ACTTGTGTTTTGTCAGGAAGAAATTTATCAACAA<br>G | NA                         | NA                          |
| Ca-II-SNP1505 | 171.59                 | Ca- <i>desi</i> -LG(Chr)8 | 7770919                 | AATTTTGATTACTTGCATTTCTTCACGGAAAAGC<br>ATTTTTTATTCGTTCAACTTTGTAATAACTCTT<br>TTATATTGTATGCAAGATTTAATTTATAT     | A         | C       | ACCTACAAAAACAACAGCATCACACATATCAC<br>ATTTTTAAACATCAGATTAACATTTTTAAATCA<br>GAAGGTTGTGATGTGATTACACTATCAGTGTA         | NA                         | NA                          |



| Marker IDs    | Genetic positions (cM) | Chromosomes      | Physical positions (bp) | Flanking sequences/Forward primers                                                                            | ICC 12968 | ICC4958 | Flanking sequences/Reverse primers                                                                              | Annealing temperature (0C) | Amplified Product size (bp) |
|---------------|------------------------|------------------|-------------------------|---------------------------------------------------------------------------------------------------------------|-----------|---------|-----------------------------------------------------------------------------------------------------------------|----------------------------|-----------------------------|
| Ca-II-SNP1506 | 172.44                 | Ca-desi-LG(Chr)8 | 7879595                 | GACACGGTTTCGTGAGTTCCTAATTCTCTGGTTG<br>GATTGATGGTTTTGGATTTGCAAAAAATGAATAGAA<br>TGGTATGAAACATGATTCCATTCCCTACCAC | C         | T       | ATAAAACAATAAAATAGGGGTAAGAAATAAATA<br>TTTAATTAAGTTGCTCCATTCTATTGGATACATT<br>CCAAATTGGAGGGAAGAAAAATAGGAGGAGAG     | NA                         | NA                          |
| Ca-II-SNP1507 | 173.29                 | Ca-desi-LG(Chr)8 | 7943790                 | TGGTGGCTTTTTGAGTTAGAATCCCTTCACCGTTA<br>AAAACTACCAAGTTTGGCAGCACCATCTCGGTT<br>CTCTGGTTTTGCTATGTGCTTTTCGCTTC     | A         | G       | CTAAATCAAGGGAGCGTTATGAAAAACAAGAC<br>AGTGTACATTGTCCTAATCTGAAAAATGCAT<br>AGCTATGTGGAAAGCAACGAATGACTATGCAGT<br>G   | NA                         | NA                          |
| Ca-II-SNP1508 | 174.14                 | Ca-desi-LG(Chr)8 | 7944361                 | TTGTCTGAACCTCCTAAATGTCAATAGAACAA<br>ATATTTCTTTGCCAATACTATTATGGTATGCCATTT<br>TTAATTGTCATGGATGCAAGCTTTTGCT      | T         | A       | TTAAATAAAATTCAGCAAAAGCTACAAAAATA<br>AGCATATAAATAACATCACTAAATTAACAAAGC<br>AAGAAGCAACCCTACAGAAACCATTCCACAC        | NA                         | NA                          |
| Ca-II-SNP1509 | 174.99                 | Ca-desi-LG(Chr)8 | 7945632                 | AACTTGTTTTAATTTAGCACTTCAGAGTGGCTGT<br>AAATTTATGTTTTAACCTTACAAAAATTAATCAAATG<br>TATTGCAACTGCTGAGTGAATGGTTCTT   | G         | T       | TCCCATCGCTGGTGAAGTTGCATCGTTCACAT<br>AAGATGTATGGCCACGAAACTCTTTCAACATCT<br>TTCCAGATTTGAGGCCATGGATTCTATATTACA<br>T | NA                         | NA                          |
| Ca-II-SNP1510 | 175.84                 | Ca-desi-LG(Chr)8 | 8060043                 | GCAAGTTCATTATTAGGGTTCCTACAAAGATTAG<br>AATAATGACACATCAACTTGAATTCTCGGTGT<br>AGATGCTACGTAGTTGGTCTCATCCTTCA       | A         | G       | GTTCTACAAAACTAGACTCGAAAAGCTTGAGA<br>AAGAAAATAACCATCTTAAGTTGATCCTTTTT<br>TTGACGAATGCTCCTTTATTATACTTGTAGTCT       | NA                         | NA                          |
| Ca-II-SNP1511 | 176.69                 | Ca-desi-LG(Chr)8 | 8086999                 | AAAGGCGCTTAAATGCCATCATTGCAACATACTTA<br>CCTGGATGGAGTCAATGGCTGATCAGAAAGGCC<br>ATGGCTTAAGTTGTGACCTCCATTGCATT     | T         | A       | AGACTTGACTAAGAAGGGCCGCGCAACGCA<br>GGCCCCAACAATAACAAATTATGATGTAGGCTC<br>CACCCTTGGGTAGACCTTAGGTGAGCACCCC<br>TCC   | NA                         | NA                          |
| Ca-II-SNP1512 | 179.18                 | Ca-desi-LG(Chr)8 | 8111791                 | ATTTCTTGGTGTCTTTTTCTCTCCGTGATTATA<br>TTAATATTTCTCTGTCCCTTATTATAAAATCTACT<br>TAGAAAAATTCACAGGTACTAGAAAAGTA     | G         | C       | ATTTAATTTACCGTTGAAAACGTAAATTCTCAT<br>TATATCAAAAATTGTAAGGTAATTATGGAATAG<br>TAGGACATATTTGACAAATTTAATGCTACAA       | NA                         | NA                          |
| Ca-II-SNP1513 | 180.01                 | Ca-desi-LG(Chr)8 | 8140661                 | AAGAAGTTAATATTAGCATTAGTTGAACCTTCTACA<br>CTTGTTGTTGGACTTGTGAGACTTCACATTGAAGA<br>CCACACATATTGTGTTGGCGCTAACATGG  | A         | G       | AGTTGAATGTGAGAATGTCCAAATGCAACGAG<br>CCCGGACAACATTTGTGAGCACGAAATTACAAC<br>AGGAGCTCTTATGTCACATAGGCCTCTCTTCC<br>T  | NA                         | NA                          |

| Marker IDs    | Genetic positions (cM) | Chromosomes               | Physical positions (bp) | Flanking sequences/Forward primers                                                                          | ICC 12968 | ICC4958 | Flanking sequences/Reverse primers                                                                               | Annealing temperature (0C) | Amplified Product size (bp) |
|---------------|------------------------|---------------------------|-------------------------|-------------------------------------------------------------------------------------------------------------|-----------|---------|------------------------------------------------------------------------------------------------------------------|----------------------------|-----------------------------|
| Ca-II-SNP1514 | 180.84                 | Ca- <i>desi</i> -LG(Chr)8 | 8141174                 | TAGTGGTGTGTTATCTTAAAAGTTTTGTTAGAAG<br>TTTGTAGCAGAAATCCTATGGTGGGATTTGTACAT<br>TTTCTGACAATAGTAAAAAATCTCTTGTA  | A         | G       | GGACAGTGTAGGACAATGAGTAAATGACAGTA<br>AATTAATGAACACATAATATTCCTGGTTTCTT<br>TTGTGACAAATAGTAAATCCAGTCCTTTGCAC<br>A    | NA                         | NA                          |
| Ca-II-SNP1515 | 181.67                 | Ca- <i>desi</i> -LG(Chr)8 | 8376853                 | ACTCATACACTTGTGGATTTTTGCACAATAGCTC<br>ACTTGAACCTCCCCAATTGATCTATAAATCACTTA<br>TTGTTGTTAACATTACTTCAACAAGCTA   | C         | T       | TAGCTTTATTTTGTCTCAATTTATGTTTT<br>GTTAGTTACAGTTAGTTATGGTTCTAACTAATTG<br>GAGGGAATGGATAACTATATAAGGCATTGCTT          | NA                         | NA                          |
| Ca-II-SNP1516 | 182.50                 | Ca- <i>desi</i> -LG(Chr)8 | 8449855                 | ATTAGTTTTTAGCCTCTATAACGGTTACTTTATAT<br>TTTTCTTATTTTTACTTCATTCCCTTCAAAAAA<br>AACTTCAGTCCTGCATTTGAAACCTACG    | C         | T       | AAAATCAAAGAGAGAAGGCTTGAACCTTGACAC<br>TCATAGAATATTGTTGCAAAAGAAATTTTTGACA<br>GTTGGTTATTGTATTATGAAAGAAAATAAACTG     | NA                         | NA                          |
| Ca-II-SNP1517 | 183.33                 | Ca- <i>desi</i> -LG(Chr)8 | 8522269                 | TTGCATGGTGATTTAAGAGATATTAGATTTGATAA<br>AACCTTGAATCTTTCTCTTTGAATGGTGTAT<br>GTTGGAAGTATTCTAGGATGCATTGAGG      | G         | A       | TCTAAGCCTCACTCTCAACAATGTTTCATCATC<br>ATCTTCTTCTTCTCTCTCTCCACTTTTTTCC<br>ACTTACAACAAAGTCACATCACAACAAATGAA         | NA                         | NA                          |
| Ca-II-SNP1518 | 184.16                 | Ca- <i>desi</i> -LG(Chr)8 | 8579338                 | GTCAAACATAATTTTTAATTTTTACGCTTAAATAT<br>ACAATTGGTCCTTACAATTACTCTATTTTTATTTTT<br>CCACAGTTTTTTATTTTTGTCTTTGTA  | G         | A       | AAGATTAATAATTAATATTATTTATTGCAGTG<br>ATTTGTTCCAATTAACCTAATTTATATAGACTA<br>AAACAAAAGAGCAAGGATAAAAACAAAAAT          | NA                         | NA                          |
| Ca-II-SNP1519 | 184.99                 | Ca- <i>desi</i> -LG(Chr)8 | 8645587                 | GCATATCCTAAGAAGCTCTGGAGCATATGCTATT<br>TTCTTGATCAGCTCATTATAAATTCATCTATATAGA<br>GAGAGGAGCTATCTTGCTTAGTATTAGTA | C         | T       | TGCCAAAGGAAAGAAGTCCCGCAGCTGGTTTG<br>CTTAGCATCAAGTGAATCACAATATCTCACCGA<br>CTCTTGTGGATAATTTGTTCTGTTCAACTTTCTT<br>G | NA                         | NA                          |
| Ca-II-SNP1520 | 185.82                 | Ca- <i>desi</i> -LG(Chr)8 | 8779980                 | AGTCTTTAAGTTTTGTTGTTTCATGTTAGTCTATT<br>AGTTCCAAAACCTTTAGTATCTTGAGTTACAAATAT<br>TATACACCTCCTTTTTGTGCTAACATT  | G         | A       | GTTATAACAGAACATTTAATCTCTTAAGTTAC<br>AAAAAATTAACAAACATTTTAGTGCTTAAGTT<br>ACAAAAATTAACATTTTGATCCTTAACTTA           | NA                         | NA                          |
| Ca-II-SNP1521 | 186.65                 | Ca- <i>desi</i> -LG(Chr)8 | 8784040                 | TGATGAAAAAGGTATATTATGCGCTTGTACATGT<br>TTGAGCAATCATGTGTGATACTAAAGTGTGTTGTT<br>GATTATGTGAAAGAACTGTTGACTCCAC   | A         | T       | ATTCAACAATATATAATAAAATTACATTACATAT<br>ATGTTAGTCGTTGTGTTCCCAATGCATCACT<br>TGATTTGTCATGCTTCAACAAATCTTTCTTCTTA      | NA                         | NA                          |

| Marker IDs    | Genetic positions (cM) | Chromosomes               | Physical positions (bp) | Flanking sequences/Forward primers                                                                          | ICC 12968 | ICC4958 | Flanking sequences/Reverse primers                                                                                                                                                                                                                                                                                                                                                                                     | Annealing temperature (0C) | Amplified Product size (bp) |
|---------------|------------------------|---------------------------|-------------------------|-------------------------------------------------------------------------------------------------------------|-----------|---------|------------------------------------------------------------------------------------------------------------------------------------------------------------------------------------------------------------------------------------------------------------------------------------------------------------------------------------------------------------------------------------------------------------------------|----------------------------|-----------------------------|
| Ca-II-SNP1522 | 187.48                 | Ca- <i>desi</i> -LG(Chr)8 | 8912416                 | TAGCTGTTTGTGTCGTAACAACAGACGTCTGGG<br>AGGTAGTCATAAATCACCACGGGTGCAGCACTAC<br>CCCATGCATATTTATCTATACCGTCTAAATAT | T         | C       | GATTGTGCTTCTTGAGCATATCTGTTGAATTTA<br>GTAGGGAGTACTATTTTCGCGGATAAGAGTCAT<br>ACTCTAGTTGATGCGAAATACCTTCCTTTATTC<br>A                                                                                                                                                                                                                                                                                                       | NA                         | NA                          |
| Ca-II-SNP1523 | 188.31                 | Ca- <i>desi</i> -LG(Chr)8 | 8963019                 | GGTGTTTGCATCTGTAGCATTTCCTCAACCGTAC<br>TTTTGCCATCTACACCGTCTATGTGGGTGGCTGG<br>AATGACATTTGGTTATGGATTGGGTTCTTG  | C         | G       | TGTGAGATTGAAGAAAAGGCATATACTTCAATT<br>TTATGATGGAAGATTGAACCAATTATAAAGGG<br>AGTGATACCCACAGCTGCTGCAGATATTATA<br>A                                                                                                                                                                                                                                                                                                          | NA                         | NA                          |
| Ca-II-SNP1524 | 189.14                 | Ca- <i>desi</i> -LG(Chr)8 | 9007562                 | AATTTTGATTACTTGCAATTTCTCACGAAAAGC<br>ATTTTTTATTCGTTCCATAACTTTGTAATAACTCTT<br>TTATATTGATGCAAGATTTAATTTATAT   | T         | C       | AAACAAGGCGGGTCAGCTCCACCTCCGACTGC<br>CGGGGCCCCACCGGTAAGAAGCTTCTTGACA<br>TCTCCAAATTTATTTCCCTTTGTTAACTTAGAA<br>CTTTAATCCACAATTAGAAATGCATTACATTA<br>TGTACCCAAAAAAACTGCATCCAC                                                                                                                                                                                                                                               | NA                         | NA                          |
| Ca-II-SNP1525 | 189.97                 | Ca- <i>desi</i> -LG(Chr)8 | 9031119                 | GACACGGTTTCGTGAGTTCCTAATTCTCTGGTTG<br>GATTGATGGTTTGGATTTGCAAAAAATGAATAGAA<br>TGGTATGAAACATGATCCATTCCCTACCAC | T         | G       | CCAGCCTATCTTTAGCTTAAGAGGGAAGAGAG<br>AACTTCTAATAAAAATAAATAATTATAGAAAGAA<br>GGGACCGGAATACGCTAATATCCTAACTAATT<br>TGCTTATTTTATTAGAAAAAGTATGACACGCAT<br>ATGCACTACCAATACTAAAACACTCATCCTCTC<br>CTAACCAAGTACTCTGAAAAGAAAATAACATT<br>ATCCACATATACATCTTGGGCTGAGCTGGCCCA<br>TTTCTTCCCTGCTTACTCTTTAATAATCCAAAA<br>CCTTTCCACAAGCCATTAGGGTTTGACGCTCTA<br>ACCAACCGAGCTAAAAAGAACAATGGGTGGTA<br>AAGTTTACTTTGAAAATCATTATTATTTGCATGG<br>T | NA                         | NA                          |
| Ca-II-SNP1526 | 190.80                 | Ca- <i>desi</i> -LG(Chr)8 | 9879668                 | GCCTTTTCTATCAAATAGTCTCTCTCTCTCTA<br>CGGTAGATCCCAGGATGATAATCTCAATCATCTC<br>TTCACAACGATCAATCAAATCCCCAAT       | T         | A       |                                                                                                                                                                                                                                                                                                                                                                                                                        | NA                         | NA                          |
| Ca-II-SSR431  | 191.63                 | Ca- <i>desi</i> -LG(Chr)8 | 9887641                 | TACCCGGATTTGCTGAACAT                                                                                        | (TAA)18   | (TAA)20 | TTACGGATCCGGATTTTATGA                                                                                                                                                                                                                                                                                                                                                                                                  | 60.33                      | 205.00                      |
| Ca-II-SSR432  | 192.46                 | Ca- <i>desi</i> -LG(Chr)8 | 9906628                 | GCAATGTGTCGGATGCATTAT                                                                                       | (TA)13    | (TA)12  | TTTGCAAAGGCGATTTTCTT                                                                                                                                                                                                                                                                                                                                                                                                   | 60.75                      | 193.00                      |
| Ca-II-SNP1527 | 193.29                 | Ca- <i>desi</i> -LG(Chr)8 | 10009717                | TGCTACGTTTTCAAGGGCAGTATGCGTTCATGTA<br>GACTAAAACCTAAAGGCAGTTTTCGCATTTTGCCC<br>GGTGGAAACTCAGAGTGTTTATGCTATGAG | C         | T       | ACATCCACAGTTTAGAATCCACATGAAACATGT<br>GGCATAACAAGCAACAAATCCAGCTCATAAATA<br>TGTGGTCCCAATAAATGCAAGTAAAAGATAGT<br>C                                                                                                                                                                                                                                                                                                        | NA                         | NA                          |

| Marker IDs    | Genetic positions (cM) | Chromosomes      | Physical positions (bp) | Flanking sequences/Forward primers                                                                           | ICC 12968 | ICC4958 | Flanking sequences/Reverse primers                                                                              | Annealing temperature (0C) | Amplified Product size (bp) |
|---------------|------------------------|------------------|-------------------------|--------------------------------------------------------------------------------------------------------------|-----------|---------|-----------------------------------------------------------------------------------------------------------------|----------------------------|-----------------------------|
| Ca-II-SNP1528 | 194.12                 | Ca-desi-LG(Chr)8 | 10136505                | TTTCTTCTTTTGTTCCTTTTTCGTTGATTAACCA<br>AATTTTAGGGCTTCTACTTCATTTTCACTCTTTAGT<br>TTATGCATGTTGAGTTTGTGTGTGCA     | T         | G       | ATATTAGAAGAAGCATAAAAAAGCTTGAAA<br>CAATTAATAAATGGTAGCATGTCATTGATGGA<br>GCAATATATATTATTCATTATCATGTAAGTGA          | NA                         | NA                          |
| Ca-II-SNP1529 | 194.95                 | Ca-desi-LG(Chr)8 | 10138754                | AGTATCAGTACTACAGAGAAGTTGTAATAAATCT<br>CTTCGCTGTCAACAGTGCCATAGGCCCTTCGTTG<br>CATATATCCTGGATGTGCAAGGTTTCATCACG | G         | A       | CAACATGCGAGTTGCCTTGAGATCCAACATCCA<br>CCTTGAAGTGCCGTGATTCAACCATCTTTCT<br>GCTGGCCAAACGCTTGTGACTCGAAGTAGTT<br>GT   | NA                         | NA                          |
| Ca-II-SSR433  | 195.78                 | Ca-desi-LG(Chr)8 | 10224265                | CAAGAATGGTAGCTAGTAGAGGGAA                                                                                    | (GA)15    | (GA)17  | GGAAGGTGTTTTAGTGGGTG                                                                                            | 59.41                      | 133.00                      |
| Ca-II-SNP1530 | 196.61                 | Ca-desi-LG(Chr)8 | 10225098                | ATTGAATATCCACAAGGATCAAATGCAAAATCACA<br>AATGAACGCATTTGGGTTAATTTTCGTTTATTCCGG<br>TAAGCTCCGTCATTTCTTTCCGGCAGAGT | C         | G       | CAATCAAAGTGATATCTTACCATGGAATCTG<br>CATGACAGAACTCGACCCGATTCTAGCTCGCA<br>AATTCTTCCGCCGACCCGGAGACGAAAAACC<br>GGC   | NA                         | NA                          |
| Ca-II-SNP1531 | 199.10                 | Ca-desi-LG(Chr)8 | 10247387                | GTTGGCTAAATTCAAAGCAACCCAAGTCAAGTATC<br>TACATTTGTTTTGGAAGCCTTTGCCATTTCTCTGA<br>TAACCAGTTGTATGAGATTGCAAGCGCGAT | A         | T       | TATTTCTCTGTTCAAATGCCTTTGGCAACCACT<br>TTTTCGTTCTCATCCTCATTCCCTTTCTCTCGG<br>GGACAACCCATATGTATTGGTCTCTGATGCTT<br>T | NA                         | NA                          |
| Ca-II-SNP1532 | 199.93                 | Ca-desi-LG(Chr)8 | 10252427                | CAACACGCGCACTTACTTTCCGGGTGATCCTCACT<br>TCACCCCGGATAATGCTCATTGGATTACCACTTGG<br>CAGTTACCACCTACCTTGTGAGCTTTTGT  | A         | T       | TTTTTAAATTTGTGGAGTATAAATACAATGTGA<br>GGTATAGGAATTTTTTAAATAATTTTGTGAA<br>AAAAGTTTTTTTAAAAAGGGCAGTCTGATGA         | NA                         | NA                          |
| Ca-II-SNP1533 | 200.76                 | Ca-desi-LG(Chr)8 | 10512305                | TCTTGTAAGTTCAATCATTAAATAGTAAATTAATCT<br>TGTTTGCTTGTCCGTGACGTAGGCTCATCGATTG<br>AGACTGAACACGTAATCTGTATGTTATT   | A         | C       | GAAAATGGAGAACGTTTTGGATTTTCTGCTCA<br>AAACAGATAATGTTTTAAACAATTTTCAACAATC<br>AAATTAAGAAAATTAATAAAGGATAAAGGGAA      | NA                         | NA                          |
| Ca-II-SNP1534 | 201.59                 | Ca-desi-LG(Chr)8 | 10532681                | AGCCTCTTGAGAGGGAGGTGTTGGTACCGGAGG<br>GAGAAAGGACGATCTTTCCTCATGCTTGTGTC<br>TTGCAATGCCATCCGGTCCATGTCCTCCTTG     | T         | C       | CACACTGCTGACCACAGGTAAGATCAGACTGT<br>CGATCGGAGCATCGGGTGGCAATCTTTTCTTC<br>CCACAAGGGCACAAACGAGGAGGAGCAATGC<br>TTT  | NA                         | NA                          |

| Marker IDs    | Genetic positions (cM) | Chromosomes               | Physical positions (bp) | Flanking sequences/Forward primers                                                                      | ICC 12968 | ICC4958   | Flanking sequences/Reverse primers                                                                      | Annealing temperature (0C) | Amplified Product size (bp) |
|---------------|------------------------|---------------------------|-------------------------|---------------------------------------------------------------------------------------------------------|-----------|-----------|---------------------------------------------------------------------------------------------------------|----------------------------|-----------------------------|
| Ca-II-SNP1535 | 202.42                 | Ca- <i>desi</i> -LG(Chr)8 | 10539192                | TTACAATGTACGTGAACTCAGTTTAAGTACGTTTACGTGAACTCAGTTCAAGTACGTTTATGTGAACTCA GTTCACGTACCACCAATGAGTCTCAAACCTC  | T         | C         | CGTGAACCTCAGTTCACGTACATTTTAAAATTGT AAAAATTTCAGGCAGTACGTGAATTAAGTTCCG ATAAAGGTACATGATTTAAGATTGTGTAATTAAT | NA                         | NA                          |
| Ca-II-SNP1536 | 203.25                 | Ca- <i>desi</i> -LG(Chr)8 | 10541585                | TTTTCAAATCTCATGCTTGTTATGTGTTGTACATTC GTTCGGTTGCTAGGGAAAAACAATTTTCATGTTTAT TAACCATGGTCCTTCAAAAATGATAGTTC | G         | C         | AGTCACATCCACACCTTGCGAAGGTAAAAAAA AGTAGGACAATTTCTCAACATTTCAAATTTTCAT GAATATTACAACCTCAATTTTGAACAAAAATGGA  | NA                         | NA                          |
| Ca-II-SSR43   | 94.41                  | scaffold00032             | 297366                  | AAATGGGTAAATAAAAGCTTGAA                                                                                 | (AT)12    | (AT)15    | CAATTGTTGATAGAGTCGTGCT                                                                                  | 59.37                      | 170.00                      |
| Ca-II-SSR17   | 79.47                  | scaffold00046             | 81914                   | AAATCGGATGGTGGTCTAC                                                                                     | (TC)7     | (TC)15    | AAATTGAAGGATTTGGGCAG                                                                                    | 59.82                      | 147.00                      |
| Ca-II-SSR36   | 200.30                 | scaffold00046             | 231127                  | TGCTCTTCAAAGTAATTGTTCC                                                                                  | (TTATT)9  | (TTATTT)8 | TTCAATCACATCATTTTCAGGTG                                                                                 | 57.64                      | 109.00                      |
| Ca-II-SSR7    | 102.71                 | scaffold00055             | 43281                   | GAAACTTTCATGGTATAAATTCACAG                                                                              | (TTC)6    | (TTC)7    | TCCAACACCATTTCCCTCTC                                                                                    | 57.45                      | 124.00                      |
| Ca-II-SSR25   | 199.54                 | scaffold00078             | 152204                  | CAATGGCCACTTCAACAATG                                                                                    | (TCT)7    | (TCT)6    | TCTTCCCATTCCAATGTTCTG                                                                                   | 59.96                      | 101.00                      |
| Ca-II-SSR34   | 168.31                 | scaffold00079             | 201569                  | TCTTTTGAAGGTTTTGCACTCA                                                                                  | (AAG)17   | (AAG)13   | GGCTCAAACCCTCTTCTCTCT                                                                                   | 59.90                      | 139.00                      |

| Marker IDs  | Genetic positions (cM) | Chromosomes   | Physical positions (bp) | Flanking sequences/Forward primers | ICC 12968 | ICC4958  | Flanking sequences/Reverse primers | Annealing temperature (0C) | Amplified Product size (bp) |
|-------------|------------------------|---------------|-------------------------|------------------------------------|-----------|----------|------------------------------------|----------------------------|-----------------------------|
| Ca-II-SSR44 | 97.73                  | scaffold00079 | 359228                  | CAGGGAACGACCTCCTACTG               | (AT)7     | (AT)6    | TTGTTTAGGTAGAGTTGGGAGTAACA         | 59.72                      | 156.00                      |
| Ca-II-SSR18 | 88.60                  | scaffold00119 | 87150                   | CACAATTTGGGTCGACGG                 | (AT)8     | (AT)7    | TCTGGACATCCTTGAAAATTAGG            | 60.94                      | 125.00                      |
| Ca-II-SSR35 | 190.42                 | scaffold00119 | 210194                  | TGGAACCTTGTGCCTTTTAG               | (TATT)12  | (TATT)11 | CAAAGTGTGTTAAATAGATGGGA            | 57.88                      | 137.00                      |
| Ca-II-SSR1  | 1.90                   | scaffold00122 | 14473                   | TCGGTTCCAACAAATTACGG               | (TG)11    | (TG)10   | TGCAAATTCTCCATCACCTG               | 60.72                      | 141.00                      |
| Ca-II-SSR40 | 172.06                 | scaffold00122 | 273687                  | AACCCGACACTTAACCGATG               | (TTC)5    | (TTC)6   | TTTGAGAAGGGTTGAGGTG                | 59.85                      | 163.00                      |
| Ca-II-SSR6  | 96.90                  | scaffold00126 | 38794                   | GGGCTTTAAATTGAGTGAGGC              | (TA)8     | (TA)7    | TTTGAAGTTGATTCTGAGCC               | 60.09                      | 150.00                      |
| Ca-II-SSR31 | 106.86                 | scaffold00126 | 178029                  | AAGCAATGAGTCTTCCACCG               | (AATTG)6  | (AATTG)8 | CCCTCTCTCCTCCAAATTCA               | 60.26                      | 139.00                      |
| Ca-II-SSR42 | 86.11                  | scaffold00143 | 295903                  | GGAATGATGAAGTTACAGGGGA             | (TA)8     | (TA)9    | CGTGACTGGCTCACAAAGCTA              | 60.19                      | 166.00                      |

| Marker IDs  | Genetic positions (cM) | Chromosomes   | Physical positions (bp) | Flanking sequences/Forward primers | ICC 12968 | ICC4958 | Flanking sequences/Reverse primers | Annealing temperature (0C) | Amplified Product size (bp) |
|-------------|------------------------|---------------|-------------------------|------------------------------------|-----------|---------|------------------------------------|----------------------------|-----------------------------|
| Ca-II-SSR2  | 47.97                  | scaffold00156 | 26854                   | TTGTTTCATGATCTTGAGAAGTGTC          | (TA)19    | (TA)15  | AGCTAGGGGCATATTAGAGGA              | 59.69                      | 171.00                      |
| Ca-II-SSR33 | 146.71                 | scaffold00156 | 199922                  | TCACCATTTGTGAAAGTTGGA              | (AG)12    | (AG)11  | CATTTGCACTTCTGCTCTGC               | 59.01                      | 153.00                      |
| Ca-II-SSR38 | 143.11                 | scaffold00156 | 246641                  | AAATTCACTCTCTCCCTCTTCA             | (ACA)7    | (ACA)8  | CCTTGGAATTTCCAATGGTG               | 58.52                      | 193.00                      |
| Ca-II-SSR9  | 137.71                 | scaffold00157 | 54110                   | GCTCCGTTTCCACTCAGGTA               | (TC)8     | (TC)7   | GCAAATTGAGGGAGGAAACA               | 60.26                      | 108.00                      |
| Ca-II-SSR8  | 128.44                 | scaffold00158 | 47686                   | TGAAATATCGATCAAATCACGTAAA          | (AT)10    | (AT)9   | TTTCTGAAACTGTTGAATTCATT            | 59.77                      | 113.00                      |
| Ca-II-SSR26 | 70.47                  | scaffold00167 | 153407                  | TCCGTCAAAGATGAATGTGG               | (AATA)6   | (AATA)7 | CAAAGTGAACAATTAAGACAAAAACA         | 59.65                      | 181.00                      |
| Ca-II-SSR27 | 85.28                  | scaffold00167 | 162678                  | AGTGAGGGGGAGATTTGTTG               | (TAT)9    | (TAT)8  | CCTTCACATGGACCTAGTCCTAA            | 58.99                      | 158.00                      |
| Ca-II-SSR29 | 93.58                  | scaffold00173 | 170626                  | CCTCTAAGGTCAAACCCCTTG              | (TC)13    | (TC)14  | GCATAGCAGCAAACAAGCAA               | 59.98                      | 100.00                      |

| Marker IDs  | Genetic positions (cM) | Chromosomes   | Physical positions (bp) | Flanking sequences/Forward primers | ICC 12968 | ICC4958 | Flanking sequences/Reverse primers | Annealing temperature (0C) | Amplified Product size (bp) |
|-------------|------------------------|---------------|-------------------------|------------------------------------|-----------|---------|------------------------------------|----------------------------|-----------------------------|
| Ca-II-SSR39 | 147.61                 | scaffold00185 | 252811                  | GGAGCACTCAAACAACCTTCCA             | (TAA)25   | (TAA)24 | TCAATGTAAGGACCAGATGAATG            | 60.28                      | 200.00                      |
| Ca-II-SSR23 | 164.56                 | scaffold00192 | 136270                  | CGAGACAACATAACCTTTTCGG             | (ATA)6    | (ATA)5  | GCAAAACAATGTAATTCATATCTCA          | 59.62                      | 194.00                      |
| Ca-II-SSR28 | 87.77                  | scaffold00198 | 169684                  | AACCCTGTAGCTGCTGATGC               | (CT)11    | (CT)12  | ATTTTGCCACACTTTAGATTATCA           | 60.43                      | 107.00                      |
| Ca-II-SSR10 | 159.31                 | scaffold00216 | 55316                   | GGTGTTATGCGTTAAGGTAGCA             | (AAT)19   | (AAT)22 | CGTCCTCGTCACCTAATCGT               | 59.21                      | 182.00                      |
| Ca-II-SSR30 | 104.37                 | scaffold00216 | 171314                  | TGGTCCATGGTACACCACTC               | (AT)8     | (AT)9   | TGTAGGTGCTTCATAAATGCCA             | 59.23                      | 100.00                      |
| Ca-II-SSR16 | 76.77                  | scaffold00225 | 81661                   | TTATATAAAATTCGATATGCAGGATCT        | (AT)15    | (AT)16  | TCTCAATTCAACTTCCACTCAA             | 57.91                      | 145.00                      |
| Ca-II-SSR3  | 65.07                  | scaffold00229 | 29109                   | AATGGAACACCGCCAGTAAG               | (AG)9     | (AG)15  | TGTGGCTAAGCTGCTTGTG                | 59.99                      | 170.00                      |
| Ca-II-SSR20 | 106.03                 | scaffold00233 | 99420                   | GAACGAGAATGAACATAGAACGAA           | (GA)12    | (GA)13  | CGGCTGTACTTCACCGTTT                | 59.67                      | 148.00                      |



| Marker IDs  | Genetic positions (cM) | Chromosomes   | Physical positions (bp) | Flanking sequences/Forward primers | ICC 12968 | ICC4958 | Flanking sequences/Reverse primers | Annealing temperature (0C) | Amplified Product size (bp) |
|-------------|------------------------|---------------|-------------------------|------------------------------------|-----------|---------|------------------------------------|----------------------------|-----------------------------|
| Ca-II-SSR11 | 184.34                 | scaffold00252 | 56127                   | CTCGAGGGTGACCATTGATAA              | (TA)14    | (TA)11  | CCGTCGTATATAGCCGGAGA               | 59.94                      | 149.00                      |
| Ca-II-SSR37 | 108.52                 | scaffold00258 | 245622                  | CCAAAACGCATGTGTA AAAA              | (AT)8     | (AT)6   | TTGAAAAACTGAACGACACCA              | 57.24                      | 167.00                      |
| Ca-II-SSR41 | 109.35                 | scaffold00258 | 287444                  | CCCTCAGTATGCCAGTCGAT               | (AAG)6    | (AAG)7  | CACTTGAAAAAGCACACCAA               | 60.10                      | 148.00                      |
| Ca-II-SSR5  | 84.45                  | scaffold00270 | 33338                   | GCTATGTATCCACTTGCTATGTTTT          | (TA)10    | (TA)8   | GGAATGATTAGAGATTGTTCTTGATT         | 59.14                      | 138.00                      |
| Ca-II-SSR22 | 144.01                 | scaffold00278 | 135415                  | CAACGAATGTATCGCTTCAGA              | (TC)9     | (TC)10  | CGAACAACCTCAGTACCAGAGA             | 58.93                      | 153.00                      |
| Ca-II-SSR4  | 73.17                  | scaffold00289 | 32825                   | CATTCTAACACGTATCCAAATGAT           | (TA)7     | (TA)9   | AGGCAATTGCACCCACAA                 | 57.20                      | 106.00                      |
| Ca-II-SSR19 | 100.22                 | scaffold00292 | 95837                   | TGAAGAATTGATACACTTACCTCTTTT        | (AATA)5   | (ATAA)5 | TTGACAAACCAATTGAGGTTTATTT          | 58.09                      | 118.00                      |
| Ca-II-SSR13 | 205.62                 | scaffold00307 | 65051                   | ACATTTTAATTATCTTGACACCGTT          | (TA)8     | (TA)7   | TGCTCCACGAGATATTGAGGT              | 57.34                      | 156.00                      |

| Marker IDs   | Genetic positions (cM) | Chromosomes   | Physical positions (bp) | Flanking sequences/Forward primers | ICC 12968 | ICC4958 | Flanking sequences/Reverse primers | Annealing temperature (0C) | Amplified Product size (bp) |
|--------------|------------------------|---------------|-------------------------|------------------------------------|-----------|---------|------------------------------------|----------------------------|-----------------------------|
| Ca-II-SSR15  | 56.07                  | scaffold00307 | 75928                   | TGGTTCGAAGTTCAAATCTCC              | (TA)12    | (TA)11  | TCATCCCTCGTTATAAACTTCTC            | 59.16                      | 102.00                      |
| Ca-II-SSR12  | 198.02                 | scaffold00316 | 57060                   | GGAGAGGGGGTTTATCAATCT              | (TC)7     | (TC)9   | CGCACATCCATTTAAGCAGA               | 58.40                      | 174.00                      |
| Ca-II-SSR21  | 131.76                 | scaffold00316 | 118750                  | GCATACCCTTTTGTTGACGG               | (TGT)5    | (TGT)5  | TCTCACTTCAACTTTCTTCTTTCA           | 60.37                      | 117.00                      |
| Ca-II-SSR14  | 207.90                 | scaffold00325 | 68230                   | GGGTTCGGGTTCCAGAAATTTA             | (TAT)7    | (TAT)8  | GAAATGACCCAGCCCAATAA               | 60.17                      | 127.00                      |
| Ca-II-SSR32  | 135.08                 | scaffold00327 | 178985                  | CCATATGGCATAATCGTAGAAGA            | (TA)14    | (TA)13  | ACAAAAAGAATAAAAGAGACAACGA          | 58.19                      | 162.00                      |
| Ca-II-SSR24  | 188.14                 | scaffold00331 | 139676                  | TTGGGATGTGCCTTCAATTT               | (CA)6     | (CA)7   | TGTCACTCGTTTCTTAAAATTGC            | 60.31                      | 179.00                      |
| Ca-II-SSR114 | 167.14                 | scaffold00333 | 180215                  | AAAAACAACGGGCGTAACAT               | (TA)11    | (TA)10  | GGAGGAAGAAAATAAAGAATTCCA           | 59.38                      | 129.00                      |
| Ca-II-SSR112 | 109.84                 | scaffold00335 | 139785                  | TTGGTATTTGAAGCCACAA                | (AAAT)5   | (AAAT)7 | TCGATCCTTTTATCGTTTGT               | 59.01                      | 100.00                      |

| Marker IDs   | Genetic positions (cM) | Chromosomes   | Physical positions (bp) | Flanking sequences/Forward primers | ICC 12968 | ICC4958 | Flanking sequences/Reverse primers | Annealing temperature (0C) | Amplified Product size (bp) |
|--------------|------------------------|---------------|-------------------------|------------------------------------|-----------|---------|------------------------------------|----------------------------|-----------------------------|
| Ca-II-SSR81  | 159.22                 | scaffold00337 | 22733                   | TCGAGTCAACCAAAATAACCG              | (AG)12    | (AG)6   | CTTGCCCTGCGAGAAGAGTC               | 59.98                      | 197.00                      |
| Ca-II-SSR83  | 173.30                 | scaffold00346 | 28936                   | ACAAGTTTTAATGGTAGATCAATCTCT        | (AT)11    | (AT)13  | CCTTTCTCCTATTTGCAAGAAATC           | 57.25                      | 107.00                      |
| Ca-II-SSR107 | 5.12                   | scaffold00346 | 110316                  | TTTTAAAGAGATTTGCAGCGG              | (TA)8     | (TA)7   | TCAAGCATTTTGTGTGAGTGTG             | 59.50                      | 100.00                      |
| Ca-II-SSR105 | 108.93                 | scaffold00358 | 107460                  | TTCAGAAATTTGGTTTTTGACA             | (TA)14    | (TA)15  | TGACGTGGATGAGTAATTTCCG             | 57.35                      | 135.00                      |
| Ca-II-SSR88  | 184.95                 | scaffold00360 | 50340                   | TTTAAATAGGCTGGGTCAAACCTT           | (TTA)10   | (TTA)12 | AACGACTAATGAGTGATTGCCT             | 57.48                      | 192.00                      |
| Ca-II-SSR101 | 100.74                 | scaffold00360 | 93243                   | TCATTGTTGATATCGCGCTC               | (TA)8     | (AT)7   | TCCATTTGAGAGACCAACAGTG             | 59.80                      | 185.00                      |
| Ca-II-SSR90  | 146.15                 | scaffold00368 | 61125                   | CCCACAACCCAGTACCTGAA               | (TC)13    | (TC)14  | ATGAGATTTTGTGGAGGCG                | 60.80                      | 145.00                      |
| Ca-II-SSR78  | 86.45                  | scaffold00370 | 15189                   | CAATGGCCGACCACCTTATCT              | (GA)8     | (GA)9   | TGTGGTCCATGGTTCAAAT                | 59.96                      | 127.00                      |

| Marker IDs   | Genetic positions (cM) | Chromosomes   | Physical positions (bp) | Flanking sequences/Forward primers | ICC 12968 | ICC4958 | Flanking sequences/Reverse primers | Annealing temperature (0C) | Amplified Product size (bp) |
|--------------|------------------------|---------------|-------------------------|------------------------------------|-----------|---------|------------------------------------|----------------------------|-----------------------------|
| Ca-II-SSR73  | 228.70                 | scaffold00370 | 17175702                | CAAACCTCAAGTTAAGGAGAACCG           | (AT)12    | (AT)11  | CTAACTATCTCAAACCTCCTCTTGC          | 59.35                      | 101.00                      |
| Ca-II-SSR87  | 224.35                 | scaffold00381 | 47571                   | GCCATGCATTCCGAAAATAA               | (AAT)12   | (AAT)11 | GGGCTTCACGGGTCCTATTA               | 60.78                      | 191.00                      |
| Ca-II-SSR92  | 77.65                  | scaffold00381 | 62796                   | ATCCATGCAATTGGACACAA               | (AT)9     | (AT)7   | ACTTCAAACGGTGCCTAAA                | 59.78                      | 164.00                      |
| Ca-II-SSR103 | 135.71                 | scaffold00384 | 102322                  | TATCGCGCTGAAGAGGTTCT               | (TTA)8    | (TTA)9  | TCACAGAACCTAAACTTCACCAC            | 60.12                      | 156.00                      |
| Ca-II-SSR109 | 82.05                  | scaffold00385 | 116670                  | CCAAGCTGTTGGAGGAGAAG               | (TTA)29   | (TTA)27 | TCCAAACAAAATATACACATGTTCAA         | 59.98                      | 182.00                      |
| Ca-II-SSR80  | 129.62                 | scaffold00394 | 21061                   | CAGTTATGCACCATGTGCTC               | (GA)9     | (GA)8   | TGATGTCTCAACAACAGGC                | 57.70                      | 102.00                      |
| Ca-II-SSR100 | 83.81                  | scaffold00398 | 92449                   | TCAAGTAGGCATTTCTCAAGA              | (TA)9     | (TA)10  | CGCCACTGTCCACAAGTTTA               | 58.97                      | 181.00                      |
| Ca-II-SSR93  | 82.93                  | scaffold00401 | 64508                   | AGGTGCAAACATGAGAAGGG               | (ATAA)8   | (ATAA)9 | CGGAATCCGATTGCTTCTAC               | 60.11                      | 155.00                      |

| Marker IDs   | Genetic positions (cM) | Chromosomes   | Physical positions (bp) | Flanking sequences/Forward primers | ICC 12968 | ICC4958  | Flanking sequences/Reverse primers | Annealing temperature (0C) | Amplified Product size (bp) |
|--------------|------------------------|---------------|-------------------------|------------------------------------|-----------|----------|------------------------------------|----------------------------|-----------------------------|
| Ca-II-SSR77  | 80.29                  | scaffold00407 | 9006                    | GTGGAAGCTGGAGGAGTTTG               | (TTG)5    | (TTG)6   | CCCAACACTGTTTCATTCTTGA             | 59.84                      | 135.00                      |
| Ca-II-SSR84  | 198.25                 | scaffold00409 | 31592                   | GGGACTACTTTTCGCGATTCA              | (AT)9     | (AT)8    | TTCAGTGTCTCGAACACAC                | 60.21                      | 114.00                      |
| Ca-II-SSR97  | 161.86                 | scaffold00414 | 74911                   | TTCTTCTCTTTCCCTCGGC                | (AT)9     | (AT)11   | TGCCTTATGGGTGAAATGGT               | 60.82                      | 123.00                      |
| Ca-II-SSR99  | 78.53                  | scaffold00423 | 83002                   | CCCCATATCCAAAGTAGCTCA              | (AC)9     | (AC)6    | TGAATTGGGTGCTGATCAA                | 59.05                      | 126.00                      |
| Ca-II-SSR89  | 180.34                 | scaffold00438 | 54674                   | TGCAGTCAAAGTCTGTAACACAA            | (TAA)8    | (TAA)9   | GCCACATTATTGAATGAATAGATAAAA        | 59.89                      | 148.00                      |
| Ca-II-SSR116 | 175.06                 | scaffold00446 | 258085                  | AAAGTTGAGTGTGAAGGAAATCATC          | (AT)12    | (TA)11   | TGCTCCCAAAACACGATTTTA              | 59.93                      | 212.00                      |
| Ca-II-SSR94  | 94.37                  | scaffold00448 | 66428                   | AATCCACCGGCTCTTCTCTT               | (CT)7     | (CT)8    | TTGTTTCGAGTTTCAGAGCGA              | 60.21                      | 159.00                      |
| Ca-II-SSR106 | 137.45                 | scaffold00448 | 107965                  | AATGGTCCAATGATATTAATAGATGTT        | (AATA)11  | (AATA)12 | ATTAAGTGGGTATGGGTGCG               | 57.54                      | 196.00                      |

| Marker IDs   | Genetic positions (cM) | Chromosomes   | Physical positions (bp) | Flanking sequences/Forward primers | ICC 12968 | ICC4958 | Flanking sequences/Reverse primers | Annealing temperature (0C) | Amplified Product size (bp) |
|--------------|------------------------|---------------|-------------------------|------------------------------------|-----------|---------|------------------------------------|----------------------------|-----------------------------|
| Ca-II-SSR108 | 13.20                  | scaffold00451 | 113441                  | TGGCAACGACTGGTACAAAA               | (AT)9     | (AT)8   | GTTGGGCCATTAATGAAAAA               | 60.15                      | 192.00                      |
| Ca-II-SSR113 | 143.54                 | scaffold00476 | 142835                  | CCTTTTTGTTGAGTTAGAAGTGTGC          | (AT)8     | (AT)11  | AATTTACCACATGCATCCCC               | 60.57                      | 142.00                      |
| Ca-II-SSR91  | 11.18                  | scaffold00481 | 61602                   | AACATTGTTGAGAACACACGAT             | (TA)10    | (TA)9   | GTTACAAACTGATGATGTAACACGC          | 57.11                      | 100.00                      |
| Ca-II-SSR104 | 164.50                 | scaffold00488 | 103491                  | GCGACACTGCACITTCAGG                | (TTA)11   | (TTA)10 | GGACCAAAATTCTGTTTGGG               | 60.61                      | 139.00                      |
| Ca-II-SSR96  | 133.10                 | scaffold00491 | 73070                   | TCGTTCAACAAACAAATTCTCA             | (AT)6     | (TA)11  | TTGGGTGTTGTATCAGTGCC               | 58.32                      | 154.00                      |
| Ca-II-SSR115 | 174.18                 | scaffold00514 | 244293                  | TGTTCTACGATAGACAAGGAAGAA           | (GA)9     | (GA)11  | TCTATTCTCATTTACAAATTATTCA          | 57.30                      | 163.00                      |
| Ca-II-SSR98  | 12.19                  | scaffold00517 | 82863                   | TTCGCTCAAAGGAGAAGGA                | (ATT)9    | (ATT)8  | TGGGTTGGATTGATTTGTATG              | 60.07                      | 186.00                      |
| Ca-II-SSR82  | 172.42                 | scaffold00534 | 24252                   | GACAACATAGCCATACTCCACG             | (AGA)6    | (AGA)5  | CGCATGGTTTGACATCTCT                | 59.52                      | 168.00                      |

| Marker IDs   | Genetic positions (cM) | Chromosomes   | Physical positions (bp) | Flanking sequences/Forward primers | ICC 12968 | ICC4958 | Flanking sequences/Reverse primers | Annealing temperature (0C) | Amplified Product size (bp) |
|--------------|------------------------|---------------|-------------------------|------------------------------------|-----------|---------|------------------------------------|----------------------------|-----------------------------|
| Ca-II-SSR102 | 108.02                 | scaffold00539 | 93728                   | TCACAAGAGTGATGTTTCGTTG             | (TA)13    | (TA)12  | CCGTCATTACATAACAATTGACC            | 57.29                      | 205.00                      |
| Ca-II-SSR86  | 220.27                 | scaffold00555 | 37885                   | TCAGATATGGTAATGCTATGGATTTT         | (GA)13    | (GA)18  | AGCATGTCCATGCAATAATAACT            | 59.26                      | 180.00                      |
| Ca-II-SSR111 | 105.29                 | scaffold00557 | 136653                  | AGGGAGAGGGAATTGCAAAG               | (AG)12    | (AG)14  | TGAACTCGTTTCATCGTTGG               | 60.57                      | 168.00                      |
| Ca-II-SSR74  | 0.00                   | scaffold00579 | 1298                    | TTTTTCTCTGTGCAGCTTTGA              | (ATAA)5   | (ATAA)6 | ATCGGCCATAAAGTTGGAGA               | 60.17                      | 141.00                      |
| Ca-II-SSR79  | 99.83                  | scaffold00580 | 18617                   | CAATTGATCGCAATTCTGCT               | (AT)16    | (AT)18  | ATACACTATTTAAACCAATGGACAAA         | 58.87                      | 106.00                      |
| Ca-II-SSR95  | 104.38                 | scaffold00592 | 70266                   | TTTTGCCTTTTCCATCATCA               | (TTA)6    | (TTA)7  | TGGATTGAAAAACCATGCAA               | 59.09                      | 194.00                      |
| Ca-II-SSR76  | 75.01                  | scaffold00596 | 4454                    | CGGTGAATCCTTTACGGAGA               | (TA)7     | (TA)6   | TTTCCTTTCTGTTTTCTCCAA              | 60.07                      | 135.00                      |
| Ca-II-SSR85  | 202.05                 | scaffold00598 | 36659                   | AGGTCAAGTAGTTGGCGTGT               | (AT)12    | (AT)10  | AAATGCAGGAGTTTGTGGAA               | 57.32                      | 134.00                      |

| Marker IDs   | Genetic positions (cM) | Chromosomes   | Physical positions (bp) | Flanking sequences/Forward primers | ICC 12968 | ICC4958 | Flanking sequences/Reverse primers | Annealing temperature (0C) | Amplified Product size (bp) |
|--------------|------------------------|---------------|-------------------------|------------------------------------|-----------|---------|------------------------------------|----------------------------|-----------------------------|
| Ca-II-SSR110 | 89.97                  | scaffold00604 | 129503                  | CCCAGATCAAATCAAATCAA               | (TC)8     | (TC)9   | AAAGAAAGGTTCTCGTGTGTTG             | 58.92                      | 169.00                      |
| Ca-II-SSR75  | 63.78                  | scaffold00611 | 2144                    | TTGTTGATACTTTAAATGCAAGACA          | (GA)12    | (AG)6   | AAAACAAGTGTTAATCAAGAAGCA           | 58.03                      | 102.00                      |
| Ca-II-SSR144 | 6.75                   | scaffold00612 | 230414                  | AGCAACGGAAAGGATACACG               | (ATT)21   | (ATT)31 | TGACATTAGTAGGTGCAACACAGTT          | 60.13                      | 252.00                      |
| Ca-II-SSR145 | 11.23                  | scaffold00620 | 123255                  | TGTACCAATTCATGCCATTTT              | (AT)13    | (AT)12  | TCTCATGTTTCCAACCACA                | 59.23                      | 178.00                      |
| Ca-II-SSR146 | 5.63                   | scaffold00626 | 23909                   | CCTCTCAAACAAATCCTCTCG              | (AT)8     | (AT)13  | ATAAATCGATATGTGTAGAGCATCA          | 58.92                      | 111.00                      |
| Ca-II-SSR147 | 16.83                  | scaffold00628 | 46633                   | TGCACCAAGACCAGCTTATG               | (TA)10    | (TA)9   | CTTCATGATTTGATCAATGGCT             | 59.86                      | 154.00                      |
| Ca-II-SSR148 | 36.46                  | scaffold00630 | 91885                   | CAGCTACGTGCTTCATAGATCC             | (TA)12    | (TA)11  | AGTCCACAAAGTGAAGGAAG               | 59.02                      | 139.00                      |
| Ca-II-SSR149 | 38.40                  | scaffold00630 | 109187                  | AAAGACTGAAGAAGGTCCTTGA             | (TA)7     | (TA)6   | TTCGTCCCTCGGATCATAGA               | 58.57                      | 159.00                      |



| Marker IDs   | Genetic positions (cM) | Chromosomes   | Physical positions (bp) | Flanking sequences/Forward primers | ICC 12968 | ICC4958 | Flanking sequences/Reverse primers | Annealing temperature (0C) | Amplified Product size (bp) |
|--------------|------------------------|---------------|-------------------------|------------------------------------|-----------|---------|------------------------------------|----------------------------|-----------------------------|
| Ca-II-SSR150 | 42.28                  | scaffold00634 | 141913                  | GGGCTAAAGCCCAATTACAC               | (TA)13    | (AT)12  | GCAACCGTAATATTGGATGGA              | 59.86                      | 110.00                      |
| Ca-II-SSR151 | 49.07                  | scaffold00659 | 119412                  | TGGTGCATGTAAAATTAATTAAGA           | (AT)6     | (AT)7   | TGCACCATAAAAAGCATGACA              | 58.28                      | 155.00                      |
| Ca-II-SSR152 | 73.31                  | scaffold00670 | 160289                  | CAATTTCAAACAATACTAAAAGTGA          | (AT)9     | (AT)8   | CCGACAACGTCTCATACATTC              | 57.32                      | 190.00                      |
| Ca-II-SSR153 | 88.75                  | scaffold00703 | 31447                   | TTCATGTTGGATTGGTGTGA               | (AG)12    | (AG)13  | CCTTCTTACCATCCACTTCTC              | 59.81                      | 100.00                      |
| Ca-II-SSR154 | 103.25                 | scaffold00719 | 39896                   | TGTGAACCTCCCTTACCCTT               | (TTC)6    | (TTC)5  | CCAAACCTAGCCGTGACACT               | 59.55                      | 127.00                      |
| Ca-II-SSR155 | 112.75                 | scaffold00724 | 106748                  | TAAGCAAATTTGGCAAGCAA               | (TAT)13   | (TAT)9  | GTATCCTTCCATTCCCCCTC               | 59.47                      | 197.00                      |
| Ca-II-SSR156 | 114.65                 | scaffold00731 | 60987                   | ACACATCGTGGTTGCATACG               | (AT)9     | (AT)8   | TTTAACACTTTCACCCTCTCATTG           | 60.46                      | 100.00                      |
| Ca-II-SSR157 | 153.61                 | scaffold00747 | 54731                   | GCAAACAAGAACCGAAAACA               | (TTA)10   | (TTA)9  | TGTTGACACCTAATTTTGTCCG             | 58.80                      | 168.00                      |

| Marker IDs   | Genetic positions (cM) | Chromosomes   | Physical positions (bp) | Flanking sequences/Forward primers | ICC 12968 | ICC4958 | Flanking sequences/Reverse primers | Annealing temperature (0C) | Amplified Product size (bp) |
|--------------|------------------------|---------------|-------------------------|------------------------------------|-----------|---------|------------------------------------|----------------------------|-----------------------------|
| Ca-II-SSR158 | 126.05                 | scaffold00760 | 51907                   | TTACATGAAAAATAAAACAAGCAA           | (TC)8     | (TC)9   | AGCAATGGAAAGTCCCATC                | 57.26                      | 190.00                      |
| Ca-II-SSR159 | 162.25                 | scaffold00777 | 19305                   | TCATGTGACCATACAAAGCATTC            | (TAT)26   | (TAT)27 | TCAAGCTGCAAAGAAGAAACC              | 59.88                      | 260.00                      |
| Ca-II-SSR160 | 168.01                 | scaffold00792 | 53958                   | GTGGTGAGGTTAGGTGGTGC               | (TAT)23   | (TAT)24 | TGAGGGATACATGAGGGACC               | 60.43                      | 246.00                      |
| Ca-II-SSR161 | 135.55                 | scaffold00795 | 12245                   | GAGATGGTGAATCATAAATACCTAAAA        | (AAT)19   | (AAT)20 | ATTATTCATCCCGTCCCAA                | 58.16                      | 138.00                      |
| Ca-II-SSR162 | 186.25                 | scaffold00795 | 94285                   | TGTCTCCAATCCTATAGCCAA              | (TA)7     | (TA)6   | CTTGTTCAATAGAATTACCTACCT           | 58.72                      | 100.00                      |
| Ca-II-SSR163 | 195.24                 | scaffold00807 | 516                     | ATGGCACTGCATCTGAAACA               | (ACA)5    | (CAA)5  | CCAAATTAAGCCTTTGGCTC               | 60.27                      | 108.00                      |
| Ca-II-SSR164 | 201.30                 | scaffold00825 | 55018                   | GGCTAGGTTAGAAATTTTACATATTGA        | (TC)8     | (TC)7   | CCCAACTGTTGACATTATCAAAG            | 57.68                      | 154.00                      |
| Ca-II-SSR165 | 208.37                 | scaffold00825 | 90232                   | GGGCTTGAATGTACAAGAA                | (AT)7     | (AT)8   | ATGCGTCGGTGCTAGCTAAA               | 58.77                      | 146.00                      |

| Marker IDs   | Genetic positions (cM) | Chromosomes   | Physical positions (bp) | Flanking sequences/Forward primers | ICC 12968 | ICC4958 | Flanking sequences/Reverse primers | Annealing temperature (0C) | Amplified Product size (bp) |
|--------------|------------------------|---------------|-------------------------|------------------------------------|-----------|---------|------------------------------------|----------------------------|-----------------------------|
| Ca-II-SSR166 | 225.54                 | scaffold00840 | 67415                   | AAAAACCACAACCAAAAAGTTTATTC         | (AAT)25   | (AAT)22 | CCGAGTTTCGAACTTTAAATTGTAT          | 59.97                      | 205.00                      |
| Ca-II-SSR167 | 230.59                 | scaffold00851 | 103140                  | ATTGGAGAAGCATTGTCCGG               | (GA)16    | (GA)17  | TGCATTTAACTTGGACGAA                | 60.07                      | 182.00                      |
| Ca-II-SSR168 | 237.66                 | scaffold00852 | 13148                   | ACACAAATTGCTTTCGCAAC               | (AT)11    | (AT)12  | CGAAATCGAAATCATTGTTC               | 58.82                      | 187.00                      |
| Ca-II-SSR169 | 252.67                 | scaffold00885 | 82619                   | GCAGCAGTTTTTCTGTGCAA               | (TTAT)7   | (TTAT)9 | TGACTATGTGAGTTAAGATTCCAATG         | 60.18                      | 121.00                      |
| Ca-II-SSR170 | 258.31                 | scaffold00888 | 7232                    | CAAATTCAAAACAATAACCATGT            | (ATA)19   | (ATA)16 | TTTTAATGGATGAAATCGAAATTCT          | 57.18                      | 170.00                      |
| Ca-II-SSR171 | 256.43                 | scaffold00907 | 141878                  | TCTTTTGATTTAATTTTGGAGTGTTTT        | (TA)10    | (TA)8   | TGGATGGAGTTAGTTAGACTCTTGG          | 59.76                      | 159.00                      |
| Ca-II-SSR172 | 10.11                  | scaffold00908 | 148256                  | GGTCTTACATTGTGTTTTCAAAGAA          | (ATT)16   | (ATT)17 | GGGTTCAACTTCAAAGCCA                | 58.71                      | 128.00                      |
| Ca-II-SSR173 | 20.19                  | scaffold00912 | 14526                   | TACCCACACCCCTCAAATGT               | (TCT)7    | (TCT)6  | TGTGTTGAATGAAGATGATGAAGA           | 60.09                      | 124.00                      |

| Marker IDs   | Genetic positions (cM) | Chromosomes   | Physical positions (bp) | Flanking sequences/Forward primers | ICC 12968 | ICC4958   | Flanking sequences/Reverse primers | Annealing temperature (0C) | Amplified Product size (bp) |
|--------------|------------------------|---------------|-------------------------|------------------------------------|-----------|-----------|------------------------------------|----------------------------|-----------------------------|
| Ca-II-SSR174 | 33.55                  | scaffold00928 | 35611                   | TGGTGTGTTGCTATACATGCC              | (TA)9     | (TA)10    | CTCCAACCAATTATGGACGC               | 59.48                      | 135.00                      |
| Ca-II-SSR175 | 34.52                  | scaffold00965 | 32759                   | CCCTTTAAAACAATTAAGCATCG            | (ATT)20   | (ATT)15   | TGACGTGGAAACATTTGTGG               | 59.13                      | 152.00                      |
| Ca-II-SSR176 | 41.31                  | scaffold00978 | 49512                   | TCAAACTCAACTTGCCATT                | (AT)10    | (AT)9     | GGTTTGCAAATAGTGTGGC                | 59.74                      | 134.00                      |
| Ca-II-SSR177 | 46.16                  | scaffold00997 | 30906                   | TGCAACATTGATTTGTAATTTG             | (AT)9     | (AT)8     | GCATTTTAGATCAATTTGCTTTTG           | 58.99                      | 176.00                      |
| Ca-II-SSR178 | 72.28                  | scaffold01004 | 239200                  | GTAGGTTATTTTACATCAATGTATCA         | (AT)11    | (AT)12    | GAAAAGTCCAAAAGCAACCG               | 57.68                      | 111.00                      |
| Ca-II-SSR179 | 91.45                  | scaffold01018 | 64137                   | TCTTCAACTACTGACTTCTGCTCA           | (ATT)22   | (ATT)28   | GAGACAATTGTGTGGAGGTTG              | 59.76                      | 206.00                      |
| Ca-II-SSR180 | 105.15                 | scaffold01040 | 84732                   | GCCCCTTGAGTCTTGCTCT                | (AAG)12   | (AAG)11   | TTCAACCTACCATGGGCTTT               | 60.90                      | 181.00                      |
| Ca-II-SSR181 | 110.85                 | scaffold01046 | 10884                   | GGGTGACACTGGATTGGGTA               | (ATAACA)6 | (ATAACA)5 | TGACTTTGGCAAACCATCA                | 60.63                      | 167.00                      |

| Marker IDs   | Genetic positions (cM) | Chromosomes   | Physical positions (bp) | Flanking sequences/Forward primers | ICC 12968 | ICC4958 | Flanking sequences/Reverse primers | Annealing temperature (0C) | Amplified Product size (bp) |
|--------------|------------------------|---------------|-------------------------|------------------------------------|-----------|---------|------------------------------------|----------------------------|-----------------------------|
| Ca-II-SSR182 | 113.70                 | scaffold01046 | 92052                   | TTTCACTCGGTTTTAATCTCCA             | (TTA)5    | (TTA)15 | TCATTTGATGGAGATTGGTTG              | 58.74                      | 172.00                      |
| Ca-II-SSR183 | 125.10                 | scaffold01086 | 69905                   | TTCTCTCATACATTGTCTCTCTTTC          | (CT)8     | (CT)9   | GGTGATTGAAGTTTTCCAACAA             | 58.73                      | 151.00                      |
| Ca-II-SSR184 | 127.00                 | scaffold01090 | 109221                  | AATATCGAAAATTACCGTGGA              | (TA)12    | (TA)7   | TTTCTTAATCATTGTTTCAGAGTCTT         | 57.60                      | 100.00                      |
| Ca-II-SSR185 | 168.97                 | scaffold01092 | 90916                   | TGGAGGGAGGACATACACTTG              | (AT)19    | (TA)16  | TGTCTCTCTTCCCTCGTTG                | 59.97                      | 115.00                      |
| Ca-II-SSR186 | 136.50                 | scaffold01093 | 56567                   | ATGGCCGTGTCCAATAAAAA               | (ATTC)5   | (ATTC)6 | GCTTCAATATGCGGGTCATT               | 60.19                      | 141.00                      |
| Ca-II-SSR187 | 170.89                 | scaffold01109 | 52905                   | CGAAGAGACATGACTTTGTCCA             | (TA)11    | (TA)15  | TTTAGAGCTGATCATTCAAAAAGA           | 60.29                      | 219.00                      |
| Ca-II-SSR188 | 185.29                 | scaffold01121 | 18387                   | CAAATACACTTACATTCAATTCCTTCA        | (AT)9     | (AT)8   | CTGCCTACTCATGTTTCAACTTT            | 57.95                      | 200.00                      |
| Ca-II-SSR189 | 194.23                 | scaffold01133 | 48159                   | AAGTGGACATTGGGATTGGA               | (AT)10    | (AT)11  | TGATTCCCCAACCAATCTTAAAAA           | 60.17                      | 140.00                      |

| Marker IDs   | Genetic positions (cM) | Chromosomes   | Physical positions (bp) | Flanking sequences/Forward primers | ICC 12968 | ICC4958 | Flanking sequences/Reverse primers | Annealing temperature (0C) | Amplified Product size (bp) |
|--------------|------------------------|---------------|-------------------------|------------------------------------|-----------|---------|------------------------------------|----------------------------|-----------------------------|
| Ca-II-SSR190 | 203.32                 | scaffold01134 | 88246                   | TGTTGTTGTGGGTTGATTG                | (AC)11    | (AC)12  | GAGAATGTTGCGTGGTCCTT               | 60.26                      | 139.00                      |
| Ca-II-SSR263 | 203.19                 | scaffold01155 | 53620                   | TGACTAAATCGAGAGTTTAAACAGGA         | (TA)11    | (TA)9   | AGCTTGCAACCTATCGAC                 |                            | 59.75                       |
| Ca-II-SSR245 | 148.53                 | scaffold01203 | 35498                   | GCAGATGTGTGCGACTTCT                | (AT)7     | (AT)8   | TTGGGCTTATGTGCAATATAAAAA           |                            | 59.04                       |
| Ca-II-SSR210 | 0.00                   | scaffold01218 | 897                     | TCAGACATTGACAACAGAACCA             | (AT)13    | (AT)11  | GTGGTGGGTGATTCTCACAA               |                            | 59.19                       |
| Ca-II-SSR280 | 309.41                 | scaffold01236 | 103282                  | CCAACACTTTGATGTTTGTA               | (TTA)9    | (TTA)10 | GCGGAACGTATCAAATCTAACA             |                            | 58.58                       |
| Ca-II-SSR267 | 101.34                 | scaffold01245 | 57148                   | CGTCTAACTTTAATTGGAATTGTTT          | (AT)7     | (TA)7   | AAATATTTGTTAAGCCACCAAAA            |                            | 57.56                       |
| Ca-II-SSR229 | 314.51                 | scaffold01280 | 20397                   | TCCTTTTCTTTTCTCCCCAAA              | (AT)13    | (AT)12  | TGCGGTGAATCTTTTACGAA               |                            | 60.03                       |
| Ca-II-SSR249 | 33.58                  | scaffold01291 | 38908                   | TGCAATGAACAACAATTTTCAA             | (ATA)6    | (ATA)7  | AGCTGCAACAGCAAGCCTA                |                            | 59.10                       |

| Marker IDs   | Genetic positions (cM) | Chromosomes   | Physical positions (bp) | Flanking sequences/Forward primers | ICC 12968 | ICC4958  | Flanking sequences/Reverse primers | Annealing temperature (0C) | Amplified Product size (bp) |
|--------------|------------------------|---------------|-------------------------|------------------------------------|-----------|----------|------------------------------------|----------------------------|-----------------------------|
| Ca-II-SSR219 | 243.14                 | scaffold01321 | 6929                    | ATCGGTTGGAATCACTTTCC               | (AAAT)12  | (AAAT)14 | ACATGGGTCAAGCCCAATAA               |                            | 58.84                       |
| Ca-II-SSR231 | 127.96                 | scaffold01327 | 21087                   | CCTGATGAAGAATACATTTTGTGC           | (AT)9     | (AT)10   | TTTGTGTGTTCTCTACCATTGTC            |                            | 59.90                       |
| Ca-II-SSR271 | 231.64                 | scaffold01330 | 60713                   | TGTTTAAATGAGTCACGCCA               | (TA)6     | (TA)7    | AGAGCATGGGTCAATCTTGG               |                            | 59.22                       |
| Ca-II-SSR256 | 131.59                 | scaffold01332 | 45869                   | TGAATTGAATTGAATGAAACCC             | (GAA)11   | (GAA)9   | CCAACGCTTTCTTCTCCAC                |                            | 58.79                       |
| Ca-II-SSR262 | 192.69                 | scaffold01335 | 53353                   | TGTACAATGACATGGGAGACTCTT           | (AT)9     | (AT)10   | AAAAATGGGTCAACTATTTGGATT           |                            | 59.93                       |
| Ca-II-SSR226 | 303.29                 | scaffold01347 | 15322                   | TGTGTCTTGAGGAAATTGATGA             | (TA)8     | (TA)6    | TCCTTTACTATAAAGTTTTCCGCAT          |                            | 58.20                       |
| Ca-II-SSR265 | 61.41                  | scaffold01364 | 55137                   | TCAGTTCTCACTTGATACGCTC             | (TA)13    | (TA)12   | GAACCTTCTTGTTCTATAATTGCG           |                            | 57.23                       |
| Ca-II-SSR211 | 11.80                  | scaffold01381 | 3060                    | GTATTGCGCGCAGCTTTTAT               | (TA)11    | (TA)12   | TCTTTTGATTTCTTTTGTCATTCA           |                            | 60.38                       |

| Marker IDs   | Genetic positions (cM) | Chromosomes   | Physical positions (bp) | Flanking sequences/Forward primers | ICC 12968 | ICC4958 | Flanking sequences/Reverse primers | Annealing temperature (0C) | Amplified Product size (bp) |
|--------------|------------------------|---------------|-------------------------|------------------------------------|-----------|---------|------------------------------------|----------------------------|-----------------------------|
| Ca-II-SSR274 | 287.99                 | scaffold01385 | 68176                   | TTGGAGAGTGGTCTGGTTG                | (TA)11    | (TA)13  | CGAGCATAATTTTCTTTTCATTACC          |                            | 59.87                       |
| Ca-II-SSR278 | 160.41                 | scaffold01385 | 76539                   | CGCTGTAACATGTACACCCAA              | (TG)8     | (TG)7   | TGCCATAAAAAGCTAAAAAGCG             |                            | 59.52                       |
| Ca-II-SSR215 | 94.08                  | scaffold01404 | 4084                    | CATCCAGTTCGACGATATGC               | (TAT)9    | (TAT)15 | AGCTTCAAGTGAAAATAAACATT            |                            | 59.11                       |
| Ca-II-SSR225 | 159.42                 | scaffold01420 | 15047                   | TTCTTTGCCATTTATGTTTTG              | (ATA)5    | (ATA)6  | TAGCATCACATCATTTTATTCTTGT          |                            | 59.02                       |
| Ca-II-SSR232 | 147.32                 | scaffold01425 | 22480                   | TCGTGAATTGCTGCAAGATT               | (TA)8     | (TA)10  | TGAAAAGGTACACCTCCACAT              |                            | 59.43                       |
| Ca-II-SSR218 | 224.19                 | scaffold01427 | 5868                    | CTGAACCAGTCTCTCGTCACA              | (TC)6     | (TC)20  | GGCTGCATTGCAAATAACTG               |                            | 59.03                       |
| Ca-II-SSR276 | 204.24                 | scaffold01453 | 70656                   | TTTGCTTCGACACTGTAGCAC              | (TA)15    | (TA)10  | TGCACGGCAATTACAACAAT               |                            | 59.14                       |
| Ca-II-SSR275 | 193.74                 | scaffold01480 | 69857                   | TGAAGACCATCCTACAAACAAAG            | (AT)11    | (AT)13  | CACGACAACGCAAGTAAAAA               |                            | 58.30                       |



| Marker IDs   | Genetic positions (cM) | Chromosomes   | Physical positions (bp) | Flanking sequences/Forward primers | ICC 12968 | ICC4958 | Flanking sequences/Reverse primers | Annealing temperature (0C) | Amplified Product size (bp) |
|--------------|------------------------|---------------|-------------------------|------------------------------------|-----------|---------|------------------------------------|----------------------------|-----------------------------|
| Ca-II-SSR223 | 292.07                 | scaffold01498 | 12514                   | TGAGGTAATAAACCGACTCCAA             | (AT)13    | (AT)15  | AATTATTTGTTGTTAAGGCGAGTT           |                            | 59.89                       |
| Ca-II-SSR244 | 130.38                 | scaffold01508 | 34787                   | GGAAATCCAACCTCATCTTCA              | (CTT)19   | (CTT)22 | TGAAATTGCTCTTTTCACCAGA             |                            | 58.97                       |
| Ca-II-SSR269 | 132.80                 | scaffold01522 | 57922                   | GGAAGAAACAACCTTCTCACCTT            | (TAT)8    | (TAT)5  | CAACAAGGTCGATCTCCTCA               |                            | 60.03                       |
| Ca-II-SSR272 | 256.94                 | scaffold01526 | 63824                   | AATATTTGCATTGAGGATGACTTG           | (TTC)5    | (TTC)6  | TGACCAAAAACCACCCTCTT               |                            | 59.42                       |
| Ca-II-SSR260 | 258.09                 | scaffold01529 | 51454                   | TGATTGCTGATGGCACTCAT               | (TTA)27   | (TTA)17 | CCGGAATGTGGATCATGC                 |                            | 60.23                       |
| Ca-II-SSR255 | 98.92                  | scaffold01544 | 45590                   | TTCTTGCTCTCTCACTGCCC               | (CT)11    | (CT)12  | CGGAGAAGAAGCTGTTTTGG               |                            | 60.39                       |
| Ca-II-SSR266 | 89.24                  | scaffold01547 | 56961                   | TTGGCTTAAACAACACACCAA              | (TA)15    | (TA)16  | TGGTACCGACGAACCCTAAT               |                            | 59.12                       |
| Ca-II-SSR279 | 305.33                 | scaffold01565 | 90966                   | TAAACCATTTAAATTTGCAACAA            | (AT)15    | (AT)14  | TCATGATGTTGTTCAAGTAATGA            |                            | 57.85                       |

| Marker IDs   | Genetic positions (cM) | Chromosomes   | Physical positions (bp) | Flanking sequences/Forward primers | ICC 12968 | ICC4958 | Flanking sequences/Reverse primers | Annealing temperature (0C) | Amplified Product size (bp) |
|--------------|------------------------|---------------|-------------------------|------------------------------------|-----------|---------|------------------------------------|----------------------------|-----------------------------|
| Ca-II-SSR241 | 85.61                  | scaffold01576 | 31865                   | CATCATTATTGAGAGTTGGGTAGTT          | (TG)8     | (TG)9   | TTAAGTCTGGCCATCAAGG                |                            | 58.97                       |
| Ca-II-SSR220 | 178.23                 | scaffold01589 | 8052                    | TCGGTCTTTCATGATCTCACC              | (TA)10    | (TA)11  | GAAGAGAAAGAACCCCACTAGG             |                            | 60.07                       |
| Ca-II-SSR248 | 247.74                 | scaffold01618 | 37514                   | ATTTTCATGTTGTAGATGAGATCAAT         | (AAT)25   | (AAT)26 | GCTTACAAGTTGCAACCCAA               |                            | 57.31                       |
| Ca-II-SSR270 | 152.49                 | scaffold01619 | 58432                   | CGACAAATAATTTTATTCGGGGT            | (TA)11    | (TA)13  | CAATTGAATTTTAGTTGGGGA              |                            | 60.30                       |
| Ca-II-SSR268 | 102.55                 | scaffold01632 | 57696                   | CGTTAATTCATGGGATGGTG               | (TAT)5    | (TAT)6  | AATGCTCGTAACATACACATCTTT           |                            | 58.70                       |
| Ca-II-SSR237 | 19.06                  | scaffold01638 | 30068                   | CCAATCAACAACCCTTCGTT               | (TC)11    | (TC)9   | AGAAACTCCTGCACCGTCAT               |                            | 59.83                       |
| Ca-II-SSR277 | 269.59                 | scaffold01647 | 74883                   | TGTGAAATGGATTGGGCAGT               | (TA)6     | (TA)11  | TTCTCGTTTTTACAATAAATATCAA          |                            | 61.31                       |
| Ca-II-SSR251 | 202.14                 | scaffold01649 | 40919                   | ACATGATGAGAGAAACCCGC               | (AG)7     | (AG)8   | GCCATCCATTTATTGCATTG               |                            | 60.08                       |

| Marker IDs   | Genetic positions (cM) | Chromosomes   | Physical positions (bp) | Flanking sequences/Forward primers | ICC 12968 | ICC4958 | Flanking sequences/Reverse primers | Annealing temperature (0C) | Amplified Product size (bp) |
|--------------|------------------------|---------------|-------------------------|------------------------------------|-----------|---------|------------------------------------|----------------------------|-----------------------------|
| Ca-II-SSR273 | 250.04                 | scaffold01689 | 63911                   | ACTTAAATGAGGGGTGAACTT              | (TA)11    | (TA)10  | GGCTTCAGAAATAATTCTCCACA            |                            | 57.38                       |
| Ca-II-SSR253 | 86.82                  | scaffold01716 | 43992                   | TCACAGAAAGCCAAAAGAAGG              | (AG)9     | (AG)8   | TCTAGGTTGTGATTCTAGGTCA             |                            | 59.48                       |
| Ca-II-SSR216 | 126.75                 | scaffold01788 | 4719                    | TTAAGTTGAAGAAAGCGTGTG              | (TAT)10   | (TAT)9  | GGGGCAGCTGTAATACCTCA               |                            | 57.34                       |
| Ca-II-SSR243 | 96.50                  | scaffold01803 | 33820                   | TTGCATCGCATTGTCTTG                 | (AG)6     | (AG)7   | GGGCTTCTTTGAAGGAAACAT              |                            | 60.79                       |
| Ca-II-SSR212 | 49.31                  | scaffold01838 | 3309                    | AAATGCTCATAAATCCATGTCTGT           | (AAT)15   | (AAT)12 | TACATTGCCTGCAACGAAAC               |                            | 58.96                       |
| Ca-II-SSR224 | 299.21                 | scaffold01855 | 13824                   | CTTGTTGTCATCTTGATTCTCA             | (AT)7     | (AT)9   | CCAATATATAGGACCCGACACA             |                            | 59.23                       |
| Ca-II-SSR240 | 50.52                  | scaffold01886 | 31675                   | TTTCCTTCTTTTTCCCTCCA               | (TA)10    | (TA)8   | TATTTGGATTTTGGCTCGG                |                            | 60.03                       |
| Ca-II-SSR258 | 230.49                 | scaffold01910 | 48198                   | GAAAACAGCTTAAATCATTCTACTCA         | (TA)13    | (TA)14  | TTGTCGATGAATCACAAAACA              |                            | 60.07                       |

| Marker IDs   | Genetic positions (cM) | Chromosomes   | Physical positions (bp) | Flanking sequences/Forward primers | ICC 12968 | ICC4958 | Flanking sequences/Reverse primers | Annealing temperature (0C) | Amplified Product size (bp) |
|--------------|------------------------|---------------|-------------------------|------------------------------------|-----------|---------|------------------------------------|----------------------------|-----------------------------|
| Ca-II-SSR264 | 268.44                 | scaffold01927 | 54554                   | AGAAAAGCATAATTCGGACAAT             | (TAT)27   | (TAT)24 | TGCAGTATGATTGTTGATCAAGTG           |                            | 57.00                       |
| Ca-II-SSR259 | 246.59                 | scaffold01928 | 49480                   | CCACATGCCCCCATATATTC               | (ATA)15   | (ATA)10 | AACAATGGTCTACGGTGGATT              |                            | 59.86                       |
| Ca-II-SSR238 | 201.09                 | scaffold01951 | 30269                   | TTCACAAAACAAAATAAAGAATGAGA         | (AT)14    | (AT)15  | TACGCGGGTGTCTTCAGATT               |                            | 58.42                       |
| Ca-II-SSR235 | 185.34                 | scaffold01955 | 24240                   | GAGGAATTATTGTGATGATTGATG           | (TAT)9    | (TAT)8  | CAAACCAAAGTTAAACACACCA             |                            | 57.52                       |
| Ca-II-SSR234 | 179.22                 | scaffold01970 | 24170                   | CGATGTTGAAGAGGTTTAGCTG             | (TA)9     | (TA)10  | TGAAGTGGTATATCTTAACCCAGGA          |                            | 59.04                       |
| Ca-II-SSR221 | 284.54                 | scaffold01989 | 8513                    | CAGTGTTACCTCATGGAACCAA             | (TA)14    | (TA)12  | ACGCAATTGCCATGGTTTTA               |                            | 59.89                       |
| Ca-II-SSR239 | 267.29                 | scaffold02000 | 31067                   | TTGAACAGCTACCGAATATGGA             | (ATA)16   | (ATA)13 | CCTATTAGGTCTGACAGGACGA             |                            | 59.61                       |
| Ca-II-SSR233 | 226.29                 | scaffold02037 | 23187                   | TTCCATCTTCTGCCAATCC                | (AT)9     | (AT)10  | AATTTAATTTGCTCTTTATTATGCAGT        |                            | 60.01                       |

| Marker IDs   | Genetic positions (cM) | Chromosomes   | Physical positions (bp) | Flanking sequences/Forward primers | ICC 12968 | ICC4958 | Flanking sequences/Reverse primers | Annealing temperature (0C) | Amplified Product size (bp) |
|--------------|------------------------|---------------|-------------------------|------------------------------------|-----------|---------|------------------------------------|----------------------------|-----------------------------|
| Ca-II-SSR252 | 60.20                  | scaffold02048 | 43471                   | ATCATCAATCATACAACATCACG            | (ATT)31   | (ATT)20 | TGTTGTGACATTTAGTGTGGAATG           |                            | 57.38                       |
| Ca-II-SSR217 | 141.27                 | scaffold02082 | 5575                    | TTCTCTTATTCTTCAATGATCCTTAGT        | (TA)14    | (TA)15  | TGATTTTCAAAAACCAAGAAGACT           |                            | 57.42                       |
| Ca-II-SSR250 | 191.64                 | scaffold02087 | 40378                   | TCACCATCAGGACTCTGCAA               | (AT)13    | (AT)12  | CCAAAAATTTTCAATTACTTGATCC          |                            | 60.40                       |
| Ca-II-SSR213 | 81.98                  | scaffold02104 | 3371                    | CACCCTCTGTATGGCAGTCA               | (AAG)7    | (AAG)6  | TCATTTGGAAAAGCACACCA               |                            | 59.70                       |
| Ca-II-SSR228 | 311.45                 | scaffold02109 | 17748                   | GGAGTTGTTGGCGAGTTGAT               | (CT)8     | (CT)9   | GACAACTATGTGGCGCAGAA               |                            | 60.12                       |
| Ca-II-SSR236 | 32.37                  | scaffold02116 | 26571                   | AACATTGTCCTTGTCTTAGTCTTGG          | (AT)6     | (AT)7   | TGAAAATCATTAGAGAGCACTTCA           |                            | 59.98                       |
| Ca-II-SSR227 | 307.37                 | scaffold02164 | 15661                   | ACGTGGCATAATCAGACGTT               | (AAT)11   | (AAT)12 | GCTGTCTGCAGAGTGCATTT               |                            | 58.10                       |
| Ca-II-SSR261 | 286.84                 | scaffold02243 | 52608                   | TGAATTATTTGTCCTTACCATCTCTTC        | (TA)7     | (TA)6   | AATTAACCTCTCAAAAACCCGACTC          |                            | 60.14                       |

| Marker IDs   | Genetic positions (cM) | Chromosomes   | Physical positions (bp) | Flanking sequences/Forward primers | ICC 12968 | ICC4958 | Flanking sequences/Reverse primers | Annealing temperature (0C) | Amplified Product size (bp) |
|--------------|------------------------|---------------|-------------------------|------------------------------------|-----------|---------|------------------------------------|----------------------------|-----------------------------|
| Ca-II-SSR222 | 17.85                  | scaffold02281 | 9375                    | AAATAACTCTTAATCATGACCATCCA         | (AT)13    | (AT)17  | GGGAAAGTGGCGAAAGGATA               |                            | 59.25                       |
| Ca-II-SSR257 | 149.52                 | scaffold02331 | 46651                   | GTGGACGAGAAGAGGTTGGA               | (GA)13    | (AG)12  | CCGGAGGAGAGTGATTGTTC               |                            | 60.24                       |
| Ca-II-SSR214 | 91.66                  | scaffold02336 | 3789                    | TGGAGCGTTTTCTCTGAACA               | (AT)14    | (AT)16  | TGAAGTTAAAGTCGAAGAAATGACA          |                            | 59.57                       |
| Ca-II-SSR246 | 228.39                 | scaffold02408 | 37253                   | ATGCAAGCCGAGCATTTAGT               | (TTA)10   | (TTA)11 | TCGGAAGGATACTTGTGATGTG             |                            | 59.87                       |
| Ca-II-SSR254 | 97.71                  | scaffold02430 | 44672                   | CTGGCATCACTGTCAAGGAG               | (TA)13    | (TA)14  | GTGCATCATGGTTGTTGGTT               |                            | 59.42                       |
| Ca-II-SSR242 | 109.81                 | scaffold02435 | 31937                   | AATTGGAGATCGGTCGTGAG               | (GA)15    | (GA)14  | CACCAAAACCGCATAAAACC               |                            | 60.07                       |
| Ca-II-SSR247 | 184.29                 | scaffold02437 | 37521                   | TGTTTCTGTCTTCAATTTGTTG             | (TC)8     | (TC)9   | TCTCCCATAGCTGCACACTG               |                            | 58.48                       |
| Ca-II-SSR230 | 108.60                 | scaffold02462 | 20792                   | TCTCGAAAGAATTTGATCTCCA             | (AT)10    | (TA)11  | GAATATACCCGATCTACAATTAATGC         |                            | 58.90                       |

| Marker IDs   | Genetic positions (cM) | Chromosomes   | Physical positions (bp) | Flanking sequences/Forward primers | ICC 12968 | ICC4958 | Flanking sequences/Reverse primers | Annealing temperature (0C) | Amplified Product size (bp) |
|--------------|------------------------|---------------|-------------------------|------------------------------------|-----------|---------|------------------------------------|----------------------------|-----------------------------|
| Ca-II-SSR319 | 70.86                  | scaffold02487 | 32478                   | TTTGAATCCACCCACACTAGC              | (AGA)5    | (GAA)5  | CGTGAGAGGAAAGAAAGAAAGG             | 59.99                      | 105.00                      |
| Ca-II-SSR327 | 160.32                 | scaffold02501 | 119889                  | GGCCAGATCGATGAAATGAC               | (TTC)7    | (TTC)6  | TTGATTGTCTCTGATTTACAAGGA           | 60.44                      | 125.00                      |
| Ca-II-SSR322 | 106.20                 | scaffold02520 | 35644                   | AAAGAATTGTCTTTTGGTCATTTT           | (AT)8     | (AT)9   | TTATTCAAATGAGACTTTTGCTTT           | 57.45                      | 141.00                      |
| Ca-II-SSR324 | 134.70                 | scaffold02575 | 38694                   | TGCTGCAATGAGTCTCCTTAGT             | (AT)9     | (AT)11  | GGAGACCGAATTTGAATGAA               | 59.15                      | 172.00                      |
| Ca-II-SSR307 | 151.80                 | scaffold02585 | 12978                   | TGCGTTACGGGTAAAATGGT               | (AT)9     | (AT)10  | TTTCCTTTCTTTTCCCTCCA               | 60.24                      | 118.00                      |
| Ca-II-SSR309 | 158.34                 | scaffold02606 | 21574                   | TCTCACTAATCCAAAACACAAAA            | (AAT)24   | (AAT)26 | TGAACAACCTCAAATAAACAATCTTCC        | 59.91                      | 267.00                      |
| Ca-II-SSR302 | 68.58                  | scaffold02620 | 5627                    | TGGTGGTGAACCTTTTGTGGT              | (TG)8     | (TG)9   | TCTTGAGAAGTTGTGCACGG               | 58.88                      | 123.00                      |
| Ca-II-SSR318 | 14.30                  | scaffold02667 | 31666                   | GAGAAAGAAGAACGGTTGTACC             | (AAG)7    | (AAG)9  | TTCCCTTCTTTCCGAATCT                | 58.38                      | 129.00                      |

| Marker IDs   | Genetic positions (cM) | Chromosomes   | Physical positions (bp) | Flanking sequences/Forward primers | ICC 12968 | ICC4958 | Flanking sequences/Reverse primers | Annealing temperature (0C) | Amplified Product size (bp) |
|--------------|------------------------|---------------|-------------------------|------------------------------------|-----------|---------|------------------------------------|----------------------------|-----------------------------|
| Ca-II-SSR314 | 203.88                 | scaffold02674 | 27650                   | CTACAAATGATCCCCAAGC                | (GA)20    | (GA)21  | CCTAACAAATAATACGGTCATTGTCT         | 59.39                      | 237.00                      |
| Ca-II-SSR306 | 35.52                  | scaffold02688 | 9765                    | CTTTTAGTTCCTGTGCC                  | (TTC)5    | (TTC)7  | GAAAATGGAGTTTGCCTTC                | 59.61                      | 141.00                      |
| Ca-II-SSR310 | 236.55                 | scaffold02701 | 21753                   | TGATCAATCACCTTCTCGGA               | (ATT)21   | (TAT)20 | TCCCATGAAAGAGAAGCTCG               | 59.17                      | 222.00                      |
| Ca-II-SSR308 | 183.09                 | scaffold02705 | 19900                   | GGACAAAACACTAGGGGAAA               | (TA)8     | (TA)9   | CGACGAGTTTCACCAATCA                | 60.16                      | 190.00                      |
| Ca-II-SSR305 | 34.38                  | scaffold02714 | 9100                    | GAGACTACAACAAAACCAAAA              | (AT)13    | (AT)11  | CTCGAGTTCGAATCTGGGAC               | 57.43                      | 191.00                      |
| Ca-II-SSR312 | 178.14                 | scaffold02799 | 23183                   | GAACTTGGGTAGAACGGTACTATTT          | (TA)11    | (TA)10  | CATCCAACAAGGACGGAGTT               | 58.25                      | 158.00                      |
| Ca-II-SSR299 | 2.40                   | scaffold02862 | 544                     | GGCTGCGGTGAATCTTTTAC               | (AT)8     | (AT)17  | TCCTTTTCTTTTCTCCCAA                | 59.71                      | 189.00                      |
| Ca-II-SSR316 | 210.81                 | scaffold02874 | 29955                   | TGGGCTGTTGTTTTAGAGG                | (GA)12    | (GA)13  | CACCACAAATTTGCGCTTA                | 60.10                      | 170.00                      |



| Marker IDs   | Genetic positions (cM) | Chromosomes   | Physical positions (bp) | Flanking sequences/Forward primers | ICC 12968 | ICC4958 | Flanking sequences/Reverse primers | Annealing temperature (0C) | Amplified Product size (bp) |
|--------------|------------------------|---------------|-------------------------|------------------------------------|-----------|---------|------------------------------------|----------------------------|-----------------------------|
| Ca-II-SSR303 | 78.84                  | scaffold02887 | 6803                    | ACTCTCACACCTCCCCCTCT               | (TG)11    | (TG)12  | CAAACCACCATTTTCTGTGTG              | 60.11                      | 109.00                      |
| Ca-II-SSR317 | 223.68                 | scaffold02920 | 30731                   | GGGGGAAAACGTTTCCTTT                | (TA)8     | (TA)7   | TGAGATGTGAGTGAAGTGTGTG             | 60.15                      | 133.00                      |
| Ca-II-SSR323 | 133.56                 | scaffold02923 | 35666                   | TTAAAACAAAACGCACCCATT              | (AT)11    | (TA)9   | AAATTGATATGTGTAGAGCATCATGT         | 58.07                      | 167.00                      |
| Ca-II-SSR320 | 73.14                  | scaffold02932 | 33000                   | TAGTGCATCAAGGCCATTG                | (AAT)14   | (AAT)13 | AAGTTTAAAAGTTTAATTGGGGCA           | 59.69                      | 162.00                      |
| Ca-II-SSR321 | 79.98                  | scaffold02984 | 33584                   | TCCACTATTATGGCGAAAAGTT             | (TA)10    | (TA)7   | ATCATGTGGAACAACGCA                 | 57.85                      | 140.00                      |
| Ca-II-SSR326 | 253.47                 | scaffold03073 | 40474                   | GTTTTGGGAATTTGAGGGT                | (GTG)5    | (GTG)6  | CTCCTCCGAAACCAAAAACA               | 60.03                      | 149.00                      |
| Ca-II-SSR304 | 103.92                 | scaffold03176 | 8432                    | GGAGATTGACACGTCCCGTA               | (TA)13    | (AT)12  | TGTTCTGTGAGGAAGAGGAG               | 60.92                      | 147.00                      |
| Ca-II-SSR311 | 237.72                 | scaffold03215 | 22172                   | CCGTATCTGAGGCTTTTCTCA              | (TTC)8    | (TTC)5  | CCCTCTGTATGGCAGTCGAA               | 59.46                      | 106.00                      |

| Marker IDs   | Genetic positions (cM) | Chromosomes   | Physical positions (bp) | Flanking sequences/Forward primers | ICC 12968 | ICC4958 | Flanking sequences/Reverse primers                                                                          | Annealing temperature (0C)          | Amplified Product size (bp) |
|--------------|------------------------|---------------|-------------------------|------------------------------------|-----------|---------|-------------------------------------------------------------------------------------------------------------|-------------------------------------|-----------------------------|
| Ca-II-SSR313 | 197.94                 | scaffold03300 | 23828                   | AGGGCAGATGTAAAGTTGCG               | (AG)13    | (AG)14  | CCCTTTCCTCCACTCTACCC                                                                                        | 60.27                               | 181.00                      |
| Ca-II-SSR300 | 10.73                  | scaffold03309 | 5226                    | GATTGAAACTTTGTTCCCTAAAGTGA         | (TA)14    | (AT)15  | GTTAAAGGTTTCAAACCTCATGACT                                                                                   | 58.03                               | 140.00                      |
| Ca-II-SSR325 | 252.50                 | scaffold03391 | 39428                   | TCAACCTTGTTTATTTAATCCACC           | (AAT)13   | (AAT)10 | AGTAGTTCATCATGTGACAAATTAATA                                                                                 | 59.59                               | 200.00                      |
| Ca-II-SSR301 | 64.02                  | scaffold03401 | 5376                    | ATTCGTTTGGGTTTGGATTT               | (TA)9     | (TA)11  | AAAAGGACGATGGGTTTGC                                                                                         | 58.28                               | 117.00                      |
| Ca-II-SSR315 | 206.85                 | scaffold03419 | 27662                   | TCCAGTTTGAAGTTTGAAG                | (AAT)24   | (AAT)27 | CAGTGATCAAATAAATATCACATTGAA                                                                                 | 59.20                               | 183.00                      |
| Ca-II-SSR355 | 139.56                 | scaffold03420 | 8229                    | CCCTCCAACACGTGGACTAA               | (TAT)6    | (TAT)7  | AATTTTGATTGGTCAAATGCAATTAGTTAACTT<br>GATTGATTTGTTGGACCTAAATTAATTTGGCTA<br>ATAAAGTATCTTAATAATGATTTGATATTATAA | TTTTGATTGG<br>TCAAAATGCA<br>A       | 60.94                       |
| Ca-II-SSR351 | 175.83                 | scaffold03480 | 7425                    | TTCAAACCTCCCTTCTTTAAAGTT           | (TA)13    | (TA)12  | TTTTTTTATCTAAATAAATGACGGAAATAGATT<br>AAGTTGTCTGTAAGAGGTCTATGGTCTGACCTG<br>ACATTTTTAATAAAAAGACTACGCTCATATTTA | GGTCTATGGT<br>CTGACCTGAC<br>ATT     | 59.94                       |
| Ca-II-SSR361 | 78.24                  | scaffold03542 | 16118                   | CCGTCGAAATATTTTCCTCTTC             | (TA)10    | (TA)11  | TAATAACTAGTATAATTTTTAGAGAAATGTT<br>TTGTTATGAAGTGATTTGTAAGTAACATCTAAC<br>ATTTTTAAATTGTAATTATTTACTCTCTTTTA    | GAAATGTTTT<br>GTTATGAAGT<br>GTATTTG | 59.12                       |

| Marker IDs   | Genetic positions (cM) | Chromosomes   | Physical positions (bp) | Flanking sequences/Forward primers | ICC 12968 | ICC4958 | Flanking sequences/Reverse primers                                                                          | Annealing temperature (0C)       | Amplified Product size (bp) |
|--------------|------------------------|---------------|-------------------------|------------------------------------|-----------|---------|-------------------------------------------------------------------------------------------------------------|----------------------------------|-----------------------------|
| Ca-II-SSR370 | 79.08                  | scaffold03589 | 26039                   | CTGGCTATGACAAAGTGGCA               | (AGA)5    | (AGA)6  | CAAACATTCACCTTATTCCTAAACCCATCCACTT<br>ATCATTGACGTGAAAAGAAAGAATCTAAAAGA<br>AAAAAAGAACACTTAATCACTCTCTAACTTCT  | CCTTATTCCT<br>AAACCCATCC<br>A    | 59.86                       |
| Ca-II-SSR369 | 37.60                  | scaffold03648 | 25093                   | AGGCCTGACAGTCCAACCTA               | (TTA)14   | (TTA)19 | TTATTACTTCAAACAATATGGAATGACTACTGA<br>GTGATTGCTTAATTGATAAAGCTTTAAAATATGAA<br>ATAATATTATAATAAATAAATAAATAATAA  | GGAATGACTA<br>CTGAGTGATT<br>GCTT | 59.72                       |
| Ca-II-SSR371 | 99.24                  | scaffold03653 | 35219                   | TGAAGATGAAGAATGTGTTGAATG           | (AAG)12   | (AAG)11 | CCCTAATTTACTACCCACACCCCTCAAATGTTT<br>TAAAAAATAAATATTTTCAAATTACCCCTCCCT<br>TCTTCTCTTCATTAACCTAACTCATTTTCTTT  | TACCCACACC<br>CCTCAAATGT         | 59.13                       |
| Ca-II-SSR366 | 169.53                 | scaffold03665 | 21120                   | CATTGATCTGTCATGATGCCTT             | (AT)7     | (AT)6   | GAGGAACACTAAAGCCACTATCGAGCTTGGTTA<br>CAATGAATTGGAAACTATTTTTGTTTTGCTTCT<br>ACTAAGCAGCTTTGATATAATGATTTTCCATA  | AGCCACTATC<br>GAGCTTGGTT<br>A    | 59.96                       |
| Ca-II-SSR360 | 191.49                 | scaffold03723 | 15777                   | TTCTATTTTCACTAAGTCGCTCCA           | (TTA)27   | (TTA)23 | TTGTATTATAGGTTATAAAAAAATTGTTGAGACT<br>TTGGGATGACAGTGGTAGATATATTTAAGAGCG<br>GAGAGGTCACGACAGCCCCAAAATTTATTTTT | TTAAGAGCGG<br>AGAGGTCACG         | 59.47                       |
| Ca-II-SSR368 | 0.94                   | scaffold03772 | 22132                   | CCCATCCATAAAAGGCAGAG               | (AG)15    | (AG)16  | CATTTTAGTTAGTCTTTTGACCTTTAAAAGTAA<br>TGAATTTTTGTGATGAAACGAAAACATCTTAA<br>AGTTATTTCTTACAGGTTCTTTTCGTCGCTC    | TTTCTTACAG<br>GTTCTTTTC<br>GTC   | 59.52                       |
| Ca-II-SSR349 | 132.00                 | scaffold03877 | 3759                    | AGTCATCATCATCACGCCTC               | (TC)10    | (TC)11  | GGGTTTTGAAAATAATAGAAGAGAAAAAAC<br>GATTAAGACATGGAGAAGAGAGAGAAAGAAAA<br>AAAATTAAGAGAAAGAGAAAAAAATTA<br>GA     | CGATTAAGAC<br>ATGGAGAAGA<br>GAGA | 58.62                       |
| Ca-II-SSR367 | 0.00                   | scaffold03924 | 21916                   | TCTGACGGCTATCAGCTTAGATT            | (AT)10    | (AT)9   | TAAATATTTAGTTTTTTTATTATACAAGATC<br>GCATGTTCAATTAAGTAAATAAATTTATCG<br>CAACACTAATTTTAAAAATTTAATAAAT           | CAAGAGATCG<br>CATGTTCAAT<br>TT   | 59.56                       |

| Marker IDs   | Genetic positions (cM) | Chromosomes   | Physical positions (bp) | Flanking sequences/Forward primers | ICC 12968 | ICC4958 | Flanking sequences/Reverse primers                                                                          | Annealing temperature (0C)          | Amplified Product size (bp) |
|--------------|------------------------|---------------|-------------------------|------------------------------------|-----------|---------|-------------------------------------------------------------------------------------------------------------|-------------------------------------|-----------------------------|
| Ca-II-SSR353 | 77.40                  | scaffold03950 | 7589                    | TCAGGCCTATCAGACCAACC               | (ATT)11   | (ATT)15 | ATGTCAAAAATTGATGTAGATTAGATTGCTTAAAT<br>TTATAGAAAATTTAGCTAATTAATGATTAACA<br>CAAAATGTGCAATTTAATAATAATAATAAT   | AATGATTAAC<br>CACAAAATGT<br>GCAA    | 60.07                       |
| Ca-II-SSR342 | 118.56                 | scaffold03965 | 2194                    | TCACTCCTCAAGTGAACCC                | (TTA)33   | (TAT)31 | TTTGCAATTAGGATTTCCCTTTTCTTCTTTTA<br>TTTTATTTATTTTACATGGGTCAAGCCAATAAA<br>TAACTTTTTTTTCCCTTTTTTTCTTTCAATA    | ATTTCCCTT<br>TTCCTTCTT              | 60.09                       |
| Ca-II-SSR338 | 60.60                  | scaffold04027 | 1150                    | TCCAAGTTTTGAGGCTAGTGG              | (AT)9     | (AT)8   | AAATTAGAGGAGCATATCCTTTATACGAGATAA<br>AAGAGAACCACCTCAATAATATGCTCAATTCTT<br>ACCATACAAAACCTCTTTATCATTGTTACAAAA | CGAGATAAAA<br>GAGAACCACC<br>TCA     | 59.36                       |
| Ca-II-SSR348 | 138.72                 | scaffold04158 | 3631                    | CTAGCCTGGCAAGCCTATCA               | (AT)10    | (AT)11  | TTGAATTGTGACTGAATTGAGAATTTAACAGGG<br>ATTTTATAAATTTGAAATGTTGAATTTATAGAG<br>GATACTCTGCCGAAATTTGAGTAAAAAGTATA  | TGAATTTATA<br>GAGGATACTC<br>TGCCG   | 60.50                       |
| Ca-II-SSR356 | 132.84                 | scaffold04194 | 10213                   | TCTTGAATTGGTTGATCATCTTG            | (CAT)5    | (CAT)6  | TTTGAATTTTCAATAAGAGAACTCTATTAGTCA<br>AAGAATCAATGCATGTATCTTTTATGAACTAA<br>CCCTTGAAAGAGGACAAAAACATTTCTTATG    | ACCCCTTGA<br>AGAGGACAAA<br>A        | 59.08                       |
| Ca-II-SSR345 | 190.81                 | scaffold04214 | 2954                    | CTGCGATTGCATCCTTATCA               | (ATT)13   | (ATT)11 | ACTTTGATTTCAAAAATTCTAAAGGTAACAATG<br>CAACAATAAGAAAGAACTACATTCTATATCATT<br>TCAATTTCTCAATTATCAATTTGAGAAAAAT   | TTCTAAAGGT<br>AAACAATGCA<br>ACAAA   | 59.79                       |
| Ca-II-SSR364 | 111.00                 | scaffold04224 | 19662                   | TGGACAAAAGGGCTGTAAAA               | (TA)6     | (TA)7   | ACTTATTTCTGCTTATATTTAGCTTGATCTTAG<br>TGTTTTATACTAAGTTCATGTAATTTAAGTGAC<br>ATTTAACTGATCATGTAATTTAGCATTGATA   | TTTTCTGCTTA<br>TATTTAGCTT<br>GATCTT | 58.27                       |
| Ca-II-SSR365 | 122.76                 | scaffold04292 | 19923                   | TTGCTTCTAACTCCATGAGCA              | (AT)10    | (AT)7   | TGGGATAGCAACTTTCTAAATTTGGGGTGGTGA<br>TTCTCAGAAAAAGAAAATAAATAAATAAATAT<br>AAAAAGAAGAAAAAGAAAATAAAAAATAAAAA   | TTTGGGGTGG<br>TGATTCTCAG            | 58.66                       |

| Marker IDs   | Genetic positions (cM) | Chromosomes   | Physical positions (bp) | Flanking sequences/Forward primers | ICC 12968 | ICC4958 | Flanking sequences/Reverse primers                                                                            | Annealing temperature (0C)          | Amplified Product size (bp) |
|--------------|------------------------|---------------|-------------------------|------------------------------------|-----------|---------|---------------------------------------------------------------------------------------------------------------|-------------------------------------|-----------------------------|
| Ca-II-SSR339 | 93.36                  | scaffold04309 | 1576                    | GCACACATTTATTCCAAAATCG             | (AAT)9    | (AAT)10 | GACATCCGTTAAAATACGGTTACCTATAACTAA<br>TTGTGCAAAATTAATTAACCTTAAGTATATTTA<br>TTTATCCTTATAATTAATATGAATAACAATTA    | CATCCGTTAA<br>AATACGGTTA<br>CCT     | 59.37                       |
| Ca-II-SSR346 | 61.44                  | scaffold04352 | 3139                    | ACACCTATACTGCTCAAATATTCTTTT        | (TA)12    | (TA)15  | AATATATCCCACTGACTTTGAAAATGGCTGAGA<br>TGAGTGATGGGTTGGGGTTTTAATTTTTATGA<br>GCACCAAATTTTAAACTTAAAAATAATATATA     | GGCTGAGATG<br>AGTGATGGGT            | 57.35                       |
| Ca-II-SSR362 | 96.72                  | scaffold04413 | 16586                   | TCGCTGTTAAAAATCGTAGTGC             | (AT)7     | (AT)8   | TGGATCCCTTTTACTTACAATGTTATTTATTTAA<br>TAGATTTAGCAGTGTTTTTATATATAAAAAATA<br>AAAACAAAAATTATATATACACCCAATA       | GGATCCCTTT<br>TACTTACAAT<br>GTTATTT | 59.45                       |
| Ca-II-SSR363 | 108.48                 | scaffold04423 | 19170                   | TGTTGAACTTTTGAACGTGGA              | (AT)10    | (AT)11  | TTAATTAAGAGTTAAACAACTATTTGACCACA<br>TGCTTTAAGTTACTATCTAAACCGATTATTAACA<br>ATAGTTGATAATTCATAAAAAGAAAGACTATA    | AAACAACTA<br>TTTGACCACA<br>TGTCTTA  | 59.21                       |
| Ca-II-SSR372 | 111.84                 | scaffold04453 | 139717                  | AATTGGGGACACAGGAATA                | (AT)20    | (AT)12  | CTTTTACATTTCAAATTAGATTTCAATATCTTCA<br>TGAAAATGTAATATGCATGTTAGATTTCAATTT<br>ACAACAAATGTGAATCTATTTGAACATCTACA   | TGCATGTTAG<br>ATTTCAATTTAC<br>AACAA | 59.10                       |
| Ca-II-SSR354 | 95.88                  | scaffold04477 | 7666                    | AAAGTGTTTCAGACTAAAATGCCTC          | (TA)11    | (TA)13  | GTGTC AATATATATCATATCAATTACATCACTT<br>TTATTAATTTATATCTTTCTCTAAGTATATACATT<br>TAATAGGGGTGTCATCAAACATCTAATATAT  | AGGGGTGCA<br>TCAAACATCT             | 59.31                       |
| Ca-II-SSR352 | 12.22                  | scaffold04583 | 7538                    | TGCACATAGCAATTACAGATGG             | (AAT)27   | (AAT)29 | CAAGTTATGGGATCCAGGAGGATACATTTTTTC<br>TACGTTGATGTCTTTACCTTGAGGACAAGGT<br>GATAGTTTGGGGGATATTGTTAGACTTATTAT<br>T | ACAAGGTGAT<br>AGTTTGGGGG            | 58.73                       |
| Ca-II-SSR343 | 175.13                 | scaffold04585 | 2415                    | ATTGTTGGCAGGTTGTGGTT               | (AT)16    | (AT)11  | CGATTGTAGTGGGGCTAATCCAAAAAATTCAC<br>CCACGTCTTATATCTCGCAGAGTAAATTGTTG<br>TAGCTTTTTACCATGAGATTAATATATGAAAT      | CCCACGTCTT<br>TATATCTCGC<br>A       | 60.28                       |

| Marker IDs   | Genetic positions (cM) | Chromosomes   | Physical positions (bp) | Flanking sequences/Forward primers | ICC 12968 | ICC4958 | Flanking sequences/Reverse primers                                                                              | Annealing temperature (0C)          | Amplified Product size (bp) |
|--------------|------------------------|---------------|-------------------------|------------------------------------|-----------|---------|-----------------------------------------------------------------------------------------------------------------|-------------------------------------|-----------------------------|
| Ca-II-SSR359 | 186.05                 | scaffold04590 | 15529                   | CCCCAGTTTTGGTCTCTCAA               | (TAT)26   | (TTA)24 | TTTCCATAAAAATCTCAATCTTTTACGGACATTT<br>TAACCTTTGTATAAGTATTAATAATTAATACAAA<br>AATATTAAGGTTTAAATGAATATAGTCTAAC     | AAAAATCTCA<br>ATCTTTTACG<br>GACA    | 60.08                       |
| Ca-II-SSR337 | 34.78                  | scaffold04616 | 429                     | CACGTTCAAGTATATTTTGAAGCAA          | (TAA)14   | (TAA)12 | AATACTAGCCATGCTGCTAAAACAAGGATAAGT<br>ATAATGTAAAAAATTTGAGAATATATTTTTAAA<br>TTTTACTTTTACGATTTTCTTTAAAAATTTATC     | GCCATGCTGC<br>TAAAAACAAGG           | 59.64                       |
| Ca-II-SSR347 | 94.20                  | scaffold04869 | 3258                    | TGCGATTCAAGAAGGAGATTG              | (TA)8     | (TA)9   | TCCTTTATTTTTCAGTTAGATCACTTTTTGAGTATG<br>TTGAATTGGAGTTGTTAAAATACTATGCGATAT<br>CATATTTGAACATAAATAAGTTAGAATCAAATA  | TTGGAGTTGT<br>TAAAATACTAT<br>GCGA   | 60.34                       |
| Ca-II-SSR358 | 168.83                 | scaffold04875 | 14016                   | TCTGGTTGTTTATTAATTCATCTTTG         | (TTA)8    | (TTA)7  | ACAAAATCCTCCCCCTCGTTTAAACCATTAAGT<br>AAACAAGATTGAATTTAGTGTTAATGCTAGTTTC<br>ACACAATTCACACCCGCATATACACAATACAC     | CCCCCTCGTT<br>TAACCATTAA<br>G       | 57.89                       |
| Ca-II-SSR350 | 120.24                 | scaffold04961 | 5959                    | CAGATCAAAGGTTGGATCAAAA             | (AG)12    | (AG)11  | CACTTCAATGCTCCATTGTCACTTGCTCTTTTCT<br>CGGATCTCTCTCACCCCTTTCATCTTTTCTTC<br>TTCCTCTTCTCATTCTTTCACAATTTGGTAT       | TGCTCCATTG<br>TCACTTGCTC            | 60.33                       |
| Ca-II-SSR340 | 106.80                 | scaffold05077 | 1646                    | ACCCACGAAATGTGTGTGAG               | (CT)6     | (CT)9   | CCGACAAAAGAACCATGTGGGACCAACATAC<br>TTCCAAATCTAACAGAGAATCAACCATGTGGGA<br>CTCTAACATCCTTTCCATTGTGATTGCATAGAG<br>AG | CAAAAGAACC<br>ATGTGGGACC            | 59.44                       |
| Ca-II-SSR357 | 121.92                 | scaffold05186 | 12370                   | TGATTGTTGTTGTTGGTGTCTG             | (AG)8     | (AG)9   | CATTCAATTTATACCTTTTATTTTTTCTTTTCCA<br>GTCCCTAATCTATGTATCTATCAATTCTTCAATA<br>TACAAATAAAAACCATTCCATTATTTATCTC     | CCAGTCCCTA<br>ATCTATGTAT<br>CTATCAA | 59.51                       |
| Ca-II-SSR344 | 185.37                 | scaffold05190 | 2785                    | CAAACGATTCATTTCGAGGCT              | (AT)7     | (AT)8   | AATATCAAATATCTCACATTTATTAATAAATAAT<br>CGAACATCTCAATAATATCAAATACCACATATTT<br>AACGAAGTTAAATCAATCAACACCTTATAAAT    | CGAAGTTAAA<br>TCAATCAACA<br>CCTT    | 60.21                       |

| Marker IDs   | Genetic positions (cM) | Chromosomes   | Physical positions (bp) | Flanking sequences/Forward primers | ICC 12968 | ICC4958 | Flanking sequences/Reverse primers                                                                        | Annealing temperature (0C) | Amplified Product size (bp) |
|--------------|------------------------|---------------|-------------------------|------------------------------------|-----------|---------|-----------------------------------------------------------------------------------------------------------|----------------------------|-----------------------------|
| Ca-II-SSR341 | 147.12                 | scaffold05191 | 2017                    | ACGGTAACGCTAAAAATTATCAA            | (ATA)22   | (ATA)29 | AAGCGCAGCTGTTGCGCTTCAGGCACACAGTG<br>TAACACCCAATTTCTTATTATATTTTAGTAATAT<br>AATATTGATAATTTATTATTATTATTATTAT | GGCACACAGT<br>GTAACACCCA   | 57.15                       |
| Ca-II-SSR383 | 73.40                  | scaffold05272 | 9743                    | CCTCATGTTTAGCGTTTGTGA              | (TAT)6    | (TAT)7  | CAACGACGAATGACGATGAC                                                                                      | 60.17                      | 154.00                      |
| Ca-II-SSR384 | 50.04                  | scaffold05576 | 4036                    | GGTGAGAGGGCTCATCAAGA               | (AG)6     | (AG)7   | ACAGATGTTCCAGCGCTCTC                                                                                      | 60.35                      | 143.00                      |
| Ca-II-SSR385 | 110.12                 | scaffold05581 | 5773                    | TCTTTAATTAGAGTATGCTTGAAACG         | (CA)12    | (CA)13  | TTTTCAACTAAAGACGGACTCG                                                                                    | 58.69                      | 103.00                      |
| Ca-II-SSR386 | 91.88                  | scaffold05583 | 56098                   | AGAATCGCGAGAAGGATGAA               | (TA)12    | (TA)13  | TGAATTGCGGCGAGAGAATA                                                                                      | 59.92                      | 184.00                      |
| Ca-II-SSR387 | 102.83                 | scaffold05624 | 1140                    | ACAGGTTGGGAATCATTGG                | (AT)14    | (AT)12  | CAAGGTGTGGTGGCATTGTA                                                                                      | 59.65                      | 168.00                      |
| Ca-II-SSR388 | 123.89                 | scaffold05741 | 8345                    | GGTTTGAAAGTGATGGGTG                | (TA)8     | (AT)8   | CTCTGTCCGTGTCCTTGCTT                                                                                      | 60.21                      | 131.00                      |
| Ca-II-SSR389 | 167.99                 | scaffold05896 | 797                     | TTGCATTTTCTCATCTTCTTGC             | (TTA)25   | (TTA)33 | CCGCAAAGTAAACTTGGAGAA                                                                                     | 59.48                      | 196.00                      |

| Marker IDs   | Genetic positions (cM) | Chromosomes   | Physical positions (bp) | Flanking sequences/Forward primers | ICC 12968 | ICC4958 | Flanking sequences/Reverse primers | Annealing temperature (0C) | Amplified Product size (bp) |
|--------------|------------------------|---------------|-------------------------|------------------------------------|-----------|---------|------------------------------------|----------------------------|-----------------------------|
| Ca-II-SSR390 | 179.69                 | scaffold05921 | 6372                    | ATCATGCTTTATGGCTGCTT               | (AC)7     | (AC)8   | CCACTTGAGGGAAATTTGG                | 57.48                      | 127.00                      |
| Ca-II-SSR391 | 212.35                 | scaffold05945 | 121055                  | TTTAGTGTGTGTATGTGCGTG              | (TG)6     | (TG)7   | GCATGTTATAAAGAACACACCCC            | 58.74                      | 135.00                      |
| Ca-II-SSR392 | 175.19                 | scaffold05946 | 1181                    | GGCTTTTATAGAGCTTATTGACAAA          | (TA)10    | (TA)9   | TTGAAAAAGCTTTGTTGAGTACC            | 57.51                      | 155.00                      |
| Ca-II-SSR393 | 131.18                 | scaffold05983 | 2502                    | CCTGGCACCATAGACCTCTT               | (AAT)27   | (AAT)22 | TCAATTTGTTAATTTGACTGCATTT          | 59.16                      | 204.00                      |
| Ca-II-SSR394 | 27.48                  | scaffold06002 | 3449                    | TGCACAGAAAAGAAAATAAAAAGG           | (AT)8     | (AT)9   | TCAACATTGGAATTTGCCTG               | 58.94                      | 142.00                      |
| Ca-II-SSR395 | 19.02                  | scaffold06035 | 8254                    | TCTTGCAATGACCAAAACCA               | (TA)7     | (TA)8   | GATCCACTACATGGTCATTATAACA          | 60.09                      | 146.00                      |
| Ca-II-SSR396 | 18.08                  | scaffold06182 | 582                     | CCATACATGTTTCAAGTTTCAACG           | (AT)17    | (AT)15  | TTTGATAGAAAATTTTGAATGTCCTC         | 60.65                      | 155.00                      |
| Ca-II-SSR397 | 4.92                   | scaffold06315 | 3095                    | TGTGACACCCTAAATGCCAA               | (AT)10    | (AT)11  | CGCGTTATTATGTTTGTATGGAA            | 59.96                      | 191.00                      |



| Marker IDs   | Genetic positions (cM) | Chromosomes   | Physical positions (bp) | Flanking sequences/Forward primers | ICC 12968 | ICC4958 | Flanking sequences/Reverse primers | Annealing temperature (0C) | Amplified Product size (bp) |
|--------------|------------------------|---------------|-------------------------|------------------------------------|-----------|---------|------------------------------------|----------------------------|-----------------------------|
| Ca-II-SSR398 | 1.16                   | scaffold06342 | 3787                    | CGATATATAATCTTAATTGGGTCTCA         | (AT)10    | (AT)9   | CACAATTGAGTTTTATTTGGGAA            | 57.04                      | 132.00                      |
| Ca-II-SSR399 | 35.94                  | scaffold06438 | 4342                    | CCATATCACAAAACTGCACG               | (AT)11    | (AT)12  | TTCCATTAAACTAGGAAAAAGTGG           | 59.10                      | 148.00                      |
| Ca-II-SSR400 | 74.28                  | scaffold06441 | 5645                    | TCCGCTGCAAATTTAAAAGAA              | (TA)15    | (TA)13  | CCAATTGGTAACTGTGACACC              | 59.85                      | 100.00                      |
| Ca-II-SSR401 | 11.50                  | scaffold06839 | 2320                    | TCACCATTTAAAAATACAATACACCAA        | (TA)11    | (TA)12  | TGGTGAAACCTCTAACGGAAA              | 59.85                      | 185.00                      |
| Ca-II-SSR402 | 7.74                   | scaffold06885 | 4049                    | GGGTAAGCAAAATCAGTCACG              | (AT)12    | (TA)11  | TGACTTTTCAAATACGTTGTTGTT           | 59.62                      | 125.00                      |
| Ca-II-SSR403 | 67.24                  | scaffold07041 | 5574                    | TTATGTCGCTATCATTCAATGTG            | (AT)13    | (AT)15  | CGTGCAAGAACAAGGTTCAA               | 57.76                      | 171.00                      |
| Ca-II-SSR404 | 87.48                  | scaffold07062 | 1520                    | GCGACCATTACAACAATCCC               | (AT)7     | (AT)12  | CGACACTGTAGCACCCCTTT               | 60.20                      | 191.00                      |
| Ca-II-SSR405 | 90.12                  | scaffold07242 | 5503                    | CGCGGGATGTATTTTACCAA               | (TA)12    | (TA)10  | TTGAAGTCAATGCTCAAGTGC              | 60.69                      | 143.00                      |

| Marker IDs   | Genetic positions (cM) | Chromosomes   | Physical positions (bp) | Flanking sequences/Forward primers | ICC 12968 | ICC4958 | Flanking sequences/Reverse primers | Annealing temperature (0C) | Amplified Product size (bp) |
|--------------|------------------------|---------------|-------------------------|------------------------------------|-----------|---------|------------------------------------|----------------------------|-----------------------------|
| Ca-II-SSR406 | 98.78                  | scaffold07311 | 1902                    | GCACATAGTTTCGAACTTGCTCT            | (TA)11    | (TA)9   | AATGCCAGTGGAGTCACACA               | 59.97                      | 129.00                      |
| Ca-II-SSR407 | 123.08                 | scaffold07533 | 7350                    | GTGAAATAGCAGCACCGACA               | (AG)10    | (AG)11  | TCACCTCCTCCAAAATCACC               | 59.87                      | 138.00                      |
| Ca-II-SSR408 | 168.89                 | scaffold07615 | 6328                    | GGCTTTTCTCACTTCTCCCC               | (CTT)9    | (TCT)8  | TCCTCTGTATGGCAGTCGAA               | 60.19                      | 108.00                      |
| Ca-II-SSR409 | 180.59                 | scaffold07735 | 4651                    | TGTGTTTCCGAAGCATACCA               | (TA)6     | (TA)7   | AGAAATGGGCGCATAACTGT               | 60.11                      | 139.00                      |
| Ca-II-SSR410 | 210.71                 | scaffold07987 | 3854                    | TTTGCCTTGTGGATTCAATTT              | (AAT)18   | (ATA)15 | CAATATCGATTGCACTCATTCA             | 59.44                      | 158.00                      |
| Ca-II-SSR411 | 173.39                 | scaffold07993 | 3308                    | CGGTTGGTCTCACCAAATCT               | (AT)12    | (AT)14  | CATCATGAAACAATTTCAAAGGTA           | 59.97                      | 141.00                      |
| Ca-II-SSR412 | 97.97                  | scaffold08095 | 3404                    | TCCTAGAGTCAACGAATCTCCA             | (TA)12    | (TA)11  | TGTTGGAACACGTCACATCAT              | 58.93                      | 131.00                      |
| Ca-II-SSR413 | 124.70                 | scaffold08140 | 6452                    | TGCGGTGAATCTTTTACGAA               | (AT)15    | (AT)10  | TTCTATTTCTTTTCTTTTCCCC             | 59.30                      | 144.00                      |

| Marker IDs   | Genetic positions (cM) | Chromosomes   | Physical positions (bp) | Flanking sequences/Forward primers | ICC 12968 | ICC4958 | Flanking sequences/Reverse primers | Annealing temperature (0C) | Amplified Product size (bp) |
|--------------|------------------------|---------------|-------------------------|------------------------------------|-----------|---------|------------------------------------|----------------------------|-----------------------------|
| Ca-II-SSR414 | 146.39                 | scaffold08236 | 758                     | AGATTTCGCAGGCAGTTGAGT              | (AT)8     | (AT)7   | GCGCGCAAGCTATACTCCTA               | 60.02                      | 156.00                      |
| Ca-II-SSR415 | 198.59                 | scaffold08475 | 299                     | TTCAACAATATTCACAAATCCTCAA          | (TA)8     | (TA)7   | ATTTATCCGCTGCAAATTTTAT             | 59.78                      | 139.00                      |
| Ca-II-SSR416 | 209.89                 | scaffold08482 | 3815                    | CTTTCCTCCCTTCCATTCC                | (CT)9     | (CT)10  | TCATAGCAAAGTTTAGCAAACAAAA          | 59.88                      | 130.00                      |
| Ca-II-SSR417 | 174.29                 | scaffold08490 | 4849                    | CCTTATAGGGGATGGAAAATGA             | (AT)9     | (AT)8   | TTTTGGCGATTGTACCAACTT              | 59.19                      | 136.00                      |
| Ca-II-SSR418 | 131.99                 | scaffold08492 | 3756                    | TCCACTTTATCCATCATTCCG              | (CTT)14   | (CTT)15 | CCAAACACGAGAAGAGGTTGA              | 59.77                      | 170.00                      |
| Ca-II-SSR419 | 36.88                  | scaffold08497 | 3479                    | TGAATTTAAAGATTTGTTGGAAACTT         | (TTA)17   | (TTA)15 | CATGAAACATACTCCCTTCAATC            | 58.70                      | 172.00                      |
| Ca-II-SSR420 | 50.98                  | scaffold08547 | 414                     | GCATTCTCGCTGTTCTTCT                | (AT)9     | (AT)7   | CACTCATTTGAGCTCGGAAA               | 59.58                      | 166.00                      |
| Ca-II-SSR421 | 110.93                 | scaffold08648 | 6145                    | TCGTAAATGTGTGGCATTG                | (TGA)5    | (TGA)6  | CCATTAATACCGTCATCTCAGACA           | 59.48                      | 176.00                      |

| Marker IDs   | Genetic positions (cM) | Chromosomes   | Physical positions (bp) | Flanking sequences/Forward primers | ICC 12968 | ICC4958 | Flanking sequences/Reverse primers | Annealing temperature (0C) | Amplified Product size (bp) |
|--------------|------------------------|---------------|-------------------------|------------------------------------|-----------|---------|------------------------------------|----------------------------|-----------------------------|
| Ca-II-SSR422 | 92.76                  | scaffold08666 | 3070                    | CGGATACCAAAAAGTATCACCAA            | (AAT)23   | (AAT)20 | TTCTGTGTGATTGGGGTGAA               | 60.12                      | 180.00                      |
| Ca-II-SSR423 | 103.64                 | scaffold08707 | 2537                    | GCAACTGTTTCTTGGTCTTCG              | (AT)7     | (AT)8   | CAATTTCCATTTCCACAAATCA             | 59.91                      | 140.00                      |
| Ca-II-SSR464 | 144.39                 | scaffold08854 | 4837                    | TTGATACTTGATTGATCCTTGATCTT         | (CA)9     | (CA)8   | TGTTGCTCGTGTACGTCAGAT              | 57.55                      | 144.00                      |
| Ca-II-SSR443 | 169.89                 | scaffold08907 | 692                     | TTTGAACGGTTGACGAATGA               | (TTA)32   | (TTA)31 | CGTGGAATGTAACACCTAGTCG             | 60.09                      | 189.00                      |
| Ca-II-SSR460 | 10.64                  | scaffold09135 | 3338                    | TTGTAGAGTCCAAAACCTTGCA             | (TA)9     | (AT)11  | TGTTGGAGTTGTGTTGATTCTT             | 59.79                      | 133.00                      |
| Ca-II-SSR453 | 143.54                 | scaffold09202 | 2058                    | TCGGGATATTAGTAATGTTCTGTTTG         | (AT)9     | (TA)9   | CATCATTAGAGGATGGTCGAAA             | 59.73                      | 148.00                      |
| Ca-II-SSR440 | 116.55                 | scaffold09234 | 574                     | CTGTTTTCAATGCCTTGCCCT              | (CA)14    | (CA)13  | GAGATGTGAGTGAAGTGATGTGTG           | 60.25                      | 152.00                      |
| Ca-II-SSR445 | 9.75                   | scaffold09449 | 813                     | CCTTTGCTTTTCCTTCCTTC               | (AT)11    | (AT)9   | GGAATGAAATGATGGGGTA                | 58.05                      | 178.00                      |

| Marker IDs   | Genetic positions (cM) | Chromosomes   | Physical positions (bp) | Flanking sequences/Forward primers | ICC 12968 | ICC4958 | Flanking sequences/Reverse primers | Annealing temperature (0C) | Amplified Product size (bp) |
|--------------|------------------------|---------------|-------------------------|------------------------------------|-----------|---------|------------------------------------|----------------------------|-----------------------------|
| Ca-II-SSR459 | 2.63                   | scaffold09742 | 3299                    | TTGGGGGAGAATGTATAAAATGA            | (TA)10    | (TA)9   | TTTTCCCTCAAGCTGCAAT                | 59.58                      | 148.00                      |
| Ca-II-SSR439 | 112.10                 | scaffold09754 | 527                     | GGTTTGGAAAGTGATGGATGA              | (TA)7     | (TA)6   | TCCAGTTTTCTCCGTTCTC                | 59.78                      | 171.00                      |
| Ca-II-SSR441 | 123.67                 | scaffold10234 | 718                     | CCGCCAAAATCCAAAGTTTA               | (TA)12    | (TA)13  | ATCGGGTGTTCACGAGAC                 | 59.94                      | 163.00                      |
| Ca-II-SSR458 | 198.27                 | scaffold10438 | 2543                    | TCCTTTTAGAGAATTAATTGTGTTGG         | (AT)13    | (TA)12  | CAACACATAGTAAACCAATGTGTAAA         | 60.16                      | 144.00                      |
| Ca-II-SSR463 | 51.58                  | scaffold10813 | 4131                    | CAAATTCCTTTCCCATTTGTTCA            | (CTT)5    | (TCT)5  | CAAAGCAGAATGTCCCTCAA               | 60.20                      | 128.00                      |
| Ca-II-SSR465 | 118.33                 | scaffold10990 | 112130                  | AATGGGGAAAGTAGGGAACG               | (TTA)27   | (TTA)26 | TTTAGGTGTAGAAATAATTGTTGATGA        | 60.18                      | 203.00                      |
| Ca-II-SSR442 | 177.52                 | scaffold11736 | 734                     | AAAGGATCAAATCGGGAGAT               | (AT)7     | (TA)10  | ACCAGGTGTTGCATTTGACA               | 57.53                      | 157.00                      |
| Ca-II-SSR462 | 24.88                  | scaffold11762 | 3896                    | CGCTGTAGAGAACCTCCCAC               | (TTC)17   | (TTC)19 | CCGAGCCAAAATCCAAAATA               | 59.87                      | 179.00                      |

| Marker IDs   | Genetic positions (cM) | Chromosomes   | Physical positions (bp) | Flanking sequences/Forward primers | ICC 12968 | ICC4958 | Flanking sequences/Reverse primers | Annealing temperature (0C) | Amplified Product size (bp) |
|--------------|------------------------|---------------|-------------------------|------------------------------------|-----------|---------|------------------------------------|----------------------------|-----------------------------|
| Ca-II-SSR461 | 93.41                  | scaffold11876 | 3439                    | GCCAAAGTTAATAATATTTTGGAGA          | (AT)6     | (AT)8   | TTTTCTTTCTTTTCCCCC                 | 57.18                      | 110.00                      |
| Ca-II-SSR456 | 178.35                 | scaffold12317 | 2469                    | CATCGAGCTGCAAAGAAAGA               | (AGA)11   | (AGA)15 | GCTACGGCACTATATGAGGCT              | 59.30                      | 144.00                      |
| Ca-II-SSR447 | 23.99                  | scaffold12437 | 992                     | CATCACAACCATAAACAACAACA            | (AAC)12   | (AAC)8  | AAAAGGGGAGTTCAGCGACT               | 58.38                      | 169.00                      |
| Ca-II-SSR436 | 80.95                  | scaffold12901 | 236                     | TGTATGTGAATCTTGCCCTCGTC            | (TA)16    | (TA)14  | TGGATTTCACACAACAAGAA               | 60.14                      | 222.00                      |
| Ca-II-SSR435 | 73.83                  | scaffold13062 | 139                     | TATGATCGGTTGTCGCACAC               | (ATA)18   | (ATA)17 | CGTTTTGCTCATCTGTAAATCA             | 60.55                      | 202.00                      |
| Ca-II-SSR437 | 23.10                  | scaffold13160 | 285                     | AAACTCTGAGGTTTAATTGACTTGTA         | (TAA)13   | (TAA)14 | CTGATTTATGTGGAGTGCGG               | 58.14                      | 204.00                      |
| Ca-II-SSR450 | 160.54                 | scaffold13471 | 1289                    | ACTCCCTCTTGTGCTAGAAAAT             | (TA)8     | (TA)9   | ATTGGATTAGTGAATTCATTGTTT           | 57.70                      | 198.00                      |
| Ca-II-SSR434 | 1.74                   | scaffold13784 | 101                     | GAAGCAAAGAGGAGGAAAGG               | (TTA)27   | (TTA)29 | ACACGTGTCGGACATCAAT                | 59.47                      | 198.00                      |

| Marker IDs   | Genetic positions (cM) | Chromosomes   | Physical positions (bp) | Flanking sequences/Forward primers | ICC 12968 | ICC4958  | Flanking sequences/Reverse primers | Annealing temperature (0C) | Amplified Product size (bp) |
|--------------|------------------------|---------------|-------------------------|------------------------------------|-----------|----------|------------------------------------|----------------------------|-----------------------------|
| Ca-II-SSR449 | 142.69                 | scaffold14000 | 1152                    | AAAAATTTACGATGCAATGAACA            | (TA)7     | (TA)8    | TGAGCTCTTGTGAATACAATTATCA          | 58.60                      | 199.00                      |
| Ca-II-SSR444 | 197.44                 | scaffold14143 | 773                     | TTTAGGATTTTATTTGTGGGGG             | (AAAATA)5 | (AAAAT)5 | TATCCAATCATGCCAGTCCA               | 59.13                      | 151.00                      |
| Ca-II-SSR455 | 131.64                 | scaffold14352 | 2439                    | GGGATCTTTTGGCTGAAGA                | (TTG)9    | (TTG)5   | GGTCGAAGTTGAACATACCGA              | 59.24                      | 100.00                      |
| Ca-II-SSR446 | 92.52                  | scaffold14449 | 909                     | CGAACATCAAGCAATTTTACGA             | (TA)7     | (AT)6    | TCAAATCACACTAAGAGATACGAAAA         | 60.13                      | 140.00                      |
| Ca-II-SSR457 | 170.74                 | scaffold14543 | 2519                    | AAGGGGAATGAGTTTTTGCC               | (TA)8     | (TA)9    | GATTGAGAAGGGAGTGATGTGA             | 60.30                      | 141.00                      |
| Ca-II-SSR451 | 130.79                 | scaffold15923 | 1495                    | TGAAACCAAGAATTATGTTTTAGGG          | (AT)8     | (AT)9    | TCATACCAGATGCTCTCCACA              | 59.70                      | 146.00                      |
| Ca-II-SSR454 | 161.39                 | scaffold16191 | 2082                    | GCAAATTCCTAAAAAGCGGTG              | (TA)18    | (TA)17   | CGGATATCCTAAAGCCTTGTC              | 58.93                      | 115.00                      |
| Ca-II-SSR448 | 40.01                  | scaffold16819 | 1116                    | TGCTGACTGTTTGGTTTCGAG              | (GA)12    | (GA)10   | CTTTTCCCCAAAAGCTGGAC               | 60.03                      | 118.00                      |

| Marker IDs   | Genetic positions (cM) | Chromosomes   | Physical positions (bp) | Flanking sequences/Forward primers | ICC 12968 | ICC4958 | Flanking sequences/Reverse primers | Annealing temperature (0C) | Amplified Product size (bp) |
|--------------|------------------------|---------------|-------------------------|------------------------------------|-----------|---------|------------------------------------|----------------------------|-----------------------------|
| Ca-II-SSR438 | 106.76                 | scaffold16843 | 435                     | TACATCTCCAAATGCGACCA               | (AAT)15   | (AAT)13 | CACTACGTGTAAAAATGGGCAA             | 60.07                      | 134.00                      |
| Ca-II-SSR452 | 50.69                  | scaffold16975 | 1903                    | CCTTGACGACGAGTACAAC                | (AT)14    | (AT)11  | CACTGTAGCACCCCTTTTGT               | 59.37                      | 181.00                      |

\*Ca-ISSR (Cicer arietinum ICC 4958 and ICC 12968 Simple Sequence Repeat) and Ca-IISNP (Cicer arietinum ICC 4958 and ICC 12968 Single Nucleotide Polymorphism)



**Supplementary Table S2:** Phenotypic variations of three quantitative agronomic traits determined in an intra-specific chickpea mapping population (ICC 4958 x ICC 12968) using diverse statistical measures

| Traits                     | Years | Parental genotypes   |                       | F <sub>4</sub> mapping individuals |            | Heritability (H <sup>2</sup> %) | Coefficient of variation (CV) | Least square difference (LSD) | ANOVA significance (P) |
|----------------------------|-------|----------------------|-----------------------|------------------------------------|------------|---------------------------------|-------------------------------|-------------------------------|------------------------|
|                            |       | ICC 4958 (Mean ± SD) | ICC 12968 (Mean ± SD) | (Mean ± SD)                        | Range      |                                 |                               |                               |                        |
| Pod number per plant (PN)  | 2012  | 101.6 ± 2.2          | 46.7 ± 2.3            | 59.8 ± 12.6                        | 37.1-109.4 | 75                              | 21.1                          | 24.8                          | < 0.0001               |
|                            | 2013  | 110.5 ± 2.5          | 50.8 ± 2.4            | 65.0 ± 13.8                        | 40.4-119.0 | 76                              | 21.2                          | 27.2                          | < 0.001                |
| Seed number per plant (SN) | 2012  | 137.2 ± 2.1          | 54.2 ± 1.8            | 71.8 ± 15.5                        | 43.9-137.2 | 72                              | 21.6                          | 30.6                          | < 0.001                |
|                            | 2013  | 146.4 ± 2.0          | 57.8 ± 1.9            | 76.6 ± 16.6                        | 46.8-146.4 | 70                              | 21.7                          | 32.7                          | < 0.0001               |
| 100-seed weight (g) (SW)   | 2012  | 35.4 ± 2.2           | 20.8 ± 2.1            | 28.1 ± 4.2                         | 20.4-43.0  | 89                              | 14.9                          | 8.0                           | < 0.0001               |
|                            | 2013  | 33.8 ± 1.6           | 22.6 ± 1.5            | 29.0 ± 4.3                         | 21.1-44.5  | 87                              | 14.8                          | 8.2                           | < 0.0001               |

**Supplementary Table S3:** ANOVA-based summary effects of three quantitative agronomic traits measured in an intra-specific chickpea mapping population (ICC 4958 x ICC 12968) across two experimental years

| <b>Traits</b>              | <b>Variance</b>   | <b>Degree of freedom (<i>df</i>)</b> | <b>Mean square (MS)</b> | <b>Significance (P)</b> |
|----------------------------|-------------------|--------------------------------------|-------------------------|-------------------------|
| Pod number per plant (PN)  | Genotype (G)      | 189                                  | 348.3                   | P < 0.0001              |
|                            | Environment (E)   | 1                                    | 3967.6                  | P < 0.0001              |
|                            | G x E interaction | 189                                  | 0.62                    | P < 0.001               |
|                            | Error (e)         | 380                                  | 174.5                   | P < 0.001               |
| Seed number per plant (SN) | Genotype (G)      | 189                                  | 515.4                   | P < 0.0001              |
|                            | Environment (E)   | 1                                    | 3316.8                  | P < 0.001               |
|                            | G x E interaction | 189                                  | 0.54                    | P < 0.001               |
|                            | Error (e)         | 380                                  | 257.9                   | P < 0.001               |
| 100-seed weight (g) (SW)   | Genotype (G)      | 189                                  | 36.2                    | P < 0.0001              |
|                            | Environment (E)   | 1                                    | 138.4                   | P < 0.0001              |
|                            | G x E interaction | 189                                  | 0.01                    | P < 0.0001              |
|                            | Error (e)         | 380                                  | 18.1                    | P < 0.0001              |

**Supplementary Table S4:** Genomic distribution of SNP and SSR markers physically mapped on eight *desi* chickpea chromosomes

| <b>Chromosomes</b>    | <b>Size (Mb) of chromosomes (pseudomolecules)</b> | <b>Number (%) of SNP and SSR markers mapped</b> | <b>Average map density (kb)</b> |
|-----------------------|---------------------------------------------------|-------------------------------------------------|---------------------------------|
| <i>Ca-desi</i> -Chr01 | 14.79                                             | 205 (12.4)                                      | 72.1                            |
| <i>Ca-desi</i> -Chr02 | 17.30                                             | 207 (12.5)                                      | 83.6                            |
| <i>Ca-desi</i> -Chr03 | 23.38                                             | 219 (13.2)                                      | 106.8                           |
| <i>Ca-desi</i> -Chr04 | 22.09                                             | 211 (12.7)                                      | 104.7                           |
| <i>Ca-desi</i> -Chr05 | 16.30                                             | 210 (12.7)                                      | 77.6                            |
| <i>Ca-desi</i> -Chr06 | 11.48                                             | 201 (12.1)                                      | 57.1                            |
| <i>Ca-desi</i> -Chr07 | 8.46                                              | 202 (12.2)                                      | 41.9                            |
| <i>Ca-desi</i> -Chr08 | 10.57                                             | 202 (12.2)                                      | 52.3                            |
| <b>Total</b>          | <b>124.37</b>                                     | <b>1657</b>                                     | <b>75.0</b>                     |

*Ca-desi*-Chr: *Cicer arietinum desi* chromosome

**Supplementary Table S5:** SNP and SSR marker-based comparative mapping between the chromosomes of *desi* and *kabuli* chickpea genomes

| Chickpea <i>desi</i> linkage groups | Number of chickpea unique loci | Chickpea <i>Kabuli</i> chromosomes |                    |                     |                     |                     |                     |                     |                 | Total       |
|-------------------------------------|--------------------------------|------------------------------------|--------------------|---------------------|---------------------|---------------------|---------------------|---------------------|-----------------|-------------|
|                                     |                                | <i>Cak</i> Chr1                    | <i>Cak</i> Chr2    | <i>Cak</i> Chr3     | <i>Cak</i> Chr4     | <i>Cak</i> Chr5     | <i>Cak</i> Chr6     | <i>Cak</i> Chr7     | <i>Cak</i> Chr8 |             |
| <i>Cad</i> LG01                     | 197                            | <b>156 (64.19%)</b>                | 8                  | 15                  | 4                   | 16                  | 24                  | 13                  | 7               | 243         |
| <i>Cad</i> LG02                     | 183                            | 19                                 | <b>98 (38.74%)</b> | 6                   | 25                  | 17                  | 68                  | 17                  | 3               | 253         |
| <i>Cad</i> LG03                     | 179                            | 29                                 | 13                 | <b>101 (39.29%)</b> | 14                  | 17                  | 21                  | 22                  | 40              | 257         |
| <i>Cad</i> LG04                     | 192                            | 17                                 | 26                 | 12                  | <b>137 (53.31%)</b> | 18                  | 20                  | 18                  | 9               | 257         |
| <i>Cad</i> LG05                     | 169                            | 13                                 | 10                 | 5                   | 8                   | <b>153 (71.16%)</b> | 13                  | 9                   | 4               | 215         |
| <i>Cad</i> LG06                     | 176                            | 14                                 | 47                 | 3                   | 13                  | 8                   | <b>132 (54.32%)</b> | 20                  | 6               | 243         |
| <i>Cad</i> LG07                     | 157                            | 18                                 | 15                 | 13                  | 27                  | 17                  | 40                  | <b>103 (42.56%)</b> | 9               | 242         |
| <i>Cad</i> LG08                     | 197                            | 28                                 | 3                  | 6                   | 20                  | 25                  | 9                   | <b>173 (64.31%)</b> | 5               | 269         |
| <b>Total</b>                        | <b>1450</b>                    | <b>138</b>                         | <b>122</b>         | <b>60</b>           | <b>111</b>          | <b>118</b>          | <b>195</b>          | <b>99</b>           | <b>83</b>       | <b>1979</b> |

**Supplementary Table S6:** SNP and SSR marker-based comparative mapping between the chromosomes of *desi* chickpea and *Medicago* genomes

| Chickpea linkage groups | Number of chickpea unique loci | <i>Medicago truncatula</i> chromosomes |                    |                    |                    |                    |               |                    |               | Total      |
|-------------------------|--------------------------------|----------------------------------------|--------------------|--------------------|--------------------|--------------------|---------------|--------------------|---------------|------------|
|                         |                                | <i>MtChr1</i>                          | <i>MtChr2</i>      | <i>MtChr3</i>      | <i>MtChr4</i>      | <i>MtChr5</i>      | <i>MtChr6</i> | <i>MtChr7</i>      | <i>MtChr8</i> |            |
| <i>CadLG01</i>          | 28                             | 10                                     | <b>18 (22.22%)</b> | 16                 | 6                  | 11                 | 6             | 7                  | 7             | 81         |
| <i>CadLG02</i>          | 35                             | 10                                     | 12                 | 20                 | <b>36 (25.35%)</b> | 31                 | 6             | 19                 | 8             | 142        |
| <i>CadLG03</i>          | 34                             | 9                                      | 8                  | 16                 | 13                 | 14                 | 4             | <b>31 (29.80%)</b> | 9             | 104        |
| <i>CadLG04</i>          | 28                             | <b>19 (27.53%)</b>                     | 7                  | 10                 | 6                  | 7                  | 7             | 9                  | 4             | 69         |
| <i>CadLG05</i>          | 29                             | 17                                     | 22                 | <b>49 (24.87%)</b> | 21                 | 33                 | 15            | 20                 | 20            | 197        |
| <i>CadLG06</i>          | 25                             | 8                                      | 5                  | 10                 | 14                 | <b>18 (21.43%)</b> | 2             | 9                  | 18            | 84         |
| <i>CadLG07</i>          | 21                             | 10                                     | 16                 | 21                 | <b>28 (18.92%)</b> | 28                 | 4             | 25                 | 16            | 148        |
| <i>CadLG08</i>          | 31                             | 4                                      | 8                  | 6                  | <b>21 (30.00%)</b> | 5                  | 5             | 6                  | 15            | 70         |
| <b>Total</b>            | <b>231</b>                     | <b>68</b>                              | <b>78</b>          | <b>99</b>          | <b>60</b>          | <b>129</b>         | <b>49</b>     | <b>95</b>          | <b>97</b>     | <b>895</b> |

**Supplementary Table S7:** SNP and SSR marker-based comparative mapping between the chromosomes of *desi* chickpea and *Glycine* genomes

| Chickpea linkage groups | Number of chickpea unique loci | <i>Glycine max</i> chromosomes |                |                |                |                |                |                |                |                |                 |                 |                 |                 |                 |                 |                 |                 |                 |                 |                 | Total      |
|-------------------------|--------------------------------|--------------------------------|----------------|----------------|----------------|----------------|----------------|----------------|----------------|----------------|-----------------|-----------------|-----------------|-----------------|-----------------|-----------------|-----------------|-----------------|-----------------|-----------------|-----------------|------------|
|                         |                                | <i>Gm</i> Chr1                 | <i>Gm</i> Chr2 | <i>Gm</i> Chr3 | <i>Gm</i> Chr4 | <i>Gm</i> Chr5 | <i>Gm</i> Chr6 | <i>Gm</i> Chr7 | <i>Gm</i> Chr8 | <i>Gm</i> Chr9 | <i>Gm</i> Chr10 | <i>Gm</i> Chr11 | <i>Gm</i> Chr12 | <i>Gm</i> Chr13 | <i>Gm</i> Chr14 | <i>Gm</i> Chr15 | <i>Gm</i> Chr16 | <i>Gm</i> Chr17 | <i>Gm</i> Chr18 | <i>Gm</i> Chr19 | <i>Gm</i> Chr20 |            |
| <i>CadL</i> G01         | 29                             | 8                              | 2              | 0              | 6              | 3              | 8              | 4              | 5              | 15             | 7               | 2               | 6               | 16 (12.16%)     | 3               | 15              | 7               | 7               | 1               | 6               | 2               | 123        |
| <i>CadL</i> G02         | 25                             | 3                              | 13             | 1              | 20 (11.56%)    | 11             | 12             | 6              | 5              | 6              | 0               | 12              | 7               | 3               | 20              | 6               | 11              | 13              | 7               | 6               | 11              | 173        |
| <i>CadL</i> G03         | 27                             | 10                             | 12 (9.98%)     | 9              | 3              | 7              | 0              | 2              | 8              | 9              | 8               | 5               | 9               | 5               | 6               | 8               | 2               | 2               | 4               | 12              | 2               | 124        |
| <i>CadL</i> G04         | 29                             | 0                              | 10 (12.99%)    | 3              | 4              | 1              | 5              | 3              | 5              | 2              | 6               | 2               | 7               | 6               | 4               | 1               | 1               | 2               | 4               | 9               | 2               | 77         |
| <i>CadL</i> G05         | 27                             | 15                             | 14             | 11             | 17 (10.37%)    | 10             | 13             | 2              | 7              | 2              | 7               | 2               | 1               | 4               | 7               | 9               | 8               | 12              | 5               | 3               | 15              | 164        |
| <i>CadL</i> G06         | 17                             | 2                              | 7 (13.21%)     | 0              | 1              | 9              | 3              | 2              | 7              | 2              | 0               | 4               | 0               | 4               | 2               | 1               | 2               | 0               | 4               | 3               | 0               | 53         |
| <i>CadL</i> G07         | 18                             | 3                              | 1              | 0              | 2              | 1              | 1              | 3              | 4              | 4              | 4               | 3               | 1               | 2               | 1               | 0               | 2               | 4 (10.00%)      | 2               | 0               | 1               | 40         |
| <i>CadL</i> G08         | 21                             | 2                              | 6              | 5              | 9              | 4              | 15 (14.15%)    | 12             | 5              | 3              | 1               | 1               | 2               | 3               | 1               | 12              | 2               | 7               | 6               | 8               | 2               | 106        |
| <b>Total</b>            | <b>193</b>                     | <b>43</b>                      | <b>36</b>      | <b>29</b>      | <b>25</b>      | <b>46</b>      | <b>42</b>      | <b>34</b>      | <b>46</b>      | <b>43</b>      | <b>33</b>       | <b>31</b>       | <b>33</b>       | <b>27</b>       | <b>44</b>       | <b>52</b>       | <b>35</b>       | <b>43</b>       | <b>33</b>       | <b>47</b>       | <b>35</b>       | <b>860</b> |

**Supplementary Table S8:** SNP and SSR marker-based comparative mapping between the chromosomes of *desi* chickpea and *Lotus* genomes

| Chickpea linkage groups | Number of chickpea unique loci | <i>Lotus japonicus</i> chromosomes |                   |               |                    |               |               |                    | Total      |
|-------------------------|--------------------------------|------------------------------------|-------------------|---------------|--------------------|---------------|---------------|--------------------|------------|
|                         |                                | <i>LjChr1</i>                      | <i>LjChr2</i>     | <i>LjChr3</i> | <i>LjChr4</i>      | <i>LjChr5</i> | <i>LjChr6</i> | <i>LjChr7</i>      |            |
| <i>CadLG01</i>          | 8                              | 2                                  | 0                 | 4             | 1                  | 1             | 2             | <b>5 (33.33%)</b>  | 15         |
| <i>CadLG02</i>          | 13                             | 11                                 | 3                 | 6             | 5                  | 3             | 6             | <b>14 (29.16%)</b> | 48         |
| <i>CadLG03</i>          | 17                             | <b>13 (39.39%)</b>                 | 3                 | 5             | 3                  | 5             | 0             | 4                  | 33         |
| <i>CadLG04</i>          | 10                             | <b>7 (41.18%)</b>                  | 6                 | 2             | 0                  | 1             | 0             | 1                  | 17         |
| <i>CadLG05</i>          | 13                             | 5                                  | <b>6 (21.43%)</b> | 3             | 5                  | 1             | 2             | 6                  | 28         |
| <i>CadLG06</i>          | 9                              | 3                                  | 2                 | 4             | <b>10 (37.04%)</b> | 3             | 2             | 3                  | 27         |
| <i>CadLG07</i>          | 10                             | 2                                  | <b>5 (27.77%)</b> | 2             | 2                  | 0             | 2             | 5                  | 18         |
| <i>CadLG08</i>          | 19                             | 2                                  | 1                 | 0             | <b>10 (47.62%)</b> | 2             | 3             | 2                  | 21         |
| <b>Total</b>            | <b>99</b>                      | <b>25</b>                          | <b>15</b>         | <b>26</b>     | <b>16</b>          | <b>16</b>     | <b>17</b>     | <b>21</b>          | <b>207</b> |

**Supplementary Table S9:** SNP and SSR marker-based comparative mapping between the chromosomes of *desi* chickpea and *Cajanus* genomes

| Chickpea linkage groups | Number of chickpea unique loci | <i>Cajanus cajan</i> chromosomes |                   |               |               |               |               |                   |                   |               |                |                    | Total      |
|-------------------------|--------------------------------|----------------------------------|-------------------|---------------|---------------|---------------|---------------|-------------------|-------------------|---------------|----------------|--------------------|------------|
|                         |                                | <i>CcChr1</i>                    | <i>CcChr2</i>     | <i>CcChr3</i> | <i>CcChr4</i> | <i>CcChr5</i> | <i>CcChr6</i> | <i>CcChr7</i>     | <i>CcChr8</i>     | <i>CcChr9</i> | <i>CcChr10</i> | <i>CcChr11</i>     |            |
| <i>CadLG01</i>          | 11                             | 0                                | 3                 | 2             | 1             | 0             | 0             | 1                 | <b>5 (27.77%)</b> | 3             | 1              | 2                  | 18         |
| <i>CadLG02</i>          | 17                             | 2                                | 5                 | 2             | 2             | 0             | 3             | 0                 | 0                 | 3             | 2              | <b>11 (36.66%)</b> | 30         |
| <i>CadLG03</i>          | 17                             | 4                                | 4                 | 7             | 0             | 1             | 1             | <b>8 (21.05%)</b> | 3                 | 1             | 2              | 7                  | 38         |
| <i>CadLG04</i>          | 18                             | 4                                | <b>5 (16.66%)</b> | 4             | 2             | 0             | 4             | 1                 | 3                 | 1             | 2              | 4                  | 30         |
| <i>CadLG05</i>          | 17                             | 3                                | 3                 | 3             | 0             | 2             | 1             | 4                 | 2                 | 1             | 1              | <b>10 (33.33%)</b> | 30         |
| <i>CadLG06</i>          | 14                             | 0                                | <b>6 (30.00%)</b> | 3             | 1             | 2             | 1             | 0                 | 3                 | 1             | 3              | 0                  | 20         |
| <i>CadLG07</i>          | 6                              | 1                                | 1                 | 0             | 1             | 0             | 0             | 0                 | <b>2 (25.00%)</b> | 0             | 1              | 2                  | 8          |
| <i>CadLG08</i>          | 13                             | 0                                | 1                 | 3             | 0             | 0             | 0             | 1                 | 3                 | 1             | 1              | <b>8 (44.44%)</b>  | 18         |
| <b>Total</b>            | <b>113</b>                     | <b>14</b>                        | <b>17</b>         | <b>24</b>     | <b>7</b>      | <b>5</b>      | <b>10</b>     | <b>7</b>          | <b>14</b>         | <b>11</b>     | <b>13</b>      | <b>15</b>          | <b>192</b> |



**Supplementary Table S10: Chickpea genotypes utilized for evaluating polymorphic potential of SNP and SSR markers**

| Sl. No. | Genotypes with Accession No. | Cultivar types                            | Geographical origin    |
|---------|------------------------------|-------------------------------------------|------------------------|
| 1       | ICC7571                      | <i>Cicer arietinum</i> Kabuli landrace    | Israel                 |
| 2       | ICC16796                     | <i>Cicer arietinum</i> Kabuli landrace    | Portugal               |
| 3       | ICCV1                        | <i>Cicer arietinum</i> Desi variety       | Western India          |
| 4       | ICCC37                       | <i>Cicer arietinum</i> Desi variety       | Southern India         |
| 5       | ICCV88202                    | <i>Cicer arietinum</i> Desi variety       | Northern India         |
| 6       | ICCV93952                    | <i>Cicer arietinum</i> Desi variety       | Central India          |
| 7       | ICCV93954                    | <i>Cicer arietinum</i> Desi variety       | Southern India         |
| 8       | ICCV91106                    | <i>Cicer arietinum</i> Desi variety       | Central India          |
| 9       | ICCV92944                    | <i>Cicer arietinum</i> Desi variety       | Central India          |
| 10      | ICCL87207                    | <i>Cicer arietinum</i> Desi variety       | Central India          |
| 11      | ICC4951                      | <i>Cicer arietinum</i> Desi landrace      | Central India          |
| 12      | ICC8933                      | <i>Cicer arietinum</i> Desi genetic stock | Northern India         |
| 13      | IC296131                     | <i>Cicer arietinum</i> Desi variety       | Northern India         |
| 14      | IC296132                     | <i>Cicer arietinum</i> Desi variety       | Northern India         |
| 15      | IC296133                     | <i>Cicer arietinum</i> Desi variety       | Northern India         |
| 16      | BGD112                       | <i>Cicer arietinum</i> Desi genetic stock | Northern India         |
| 17      | BGD1103                      | <i>Cicer arietinum</i> Desi genetic stock | Northern India         |
| 18      | Pusa256                      | <i>Cicer arietinum</i> Desi variety       | Northern India         |
| 19      | Pusa547                      | <i>Cicer arietinum</i> Desi variety       | Northern India         |
| 20      | BGD72                        | <i>Cicer arietinum</i> Desi genetic stock | Northern India         |
| 21      | IC244160                     | <i>Cicer arietinum</i> Desi variety       | Northern India         |
| 22      | IC244217                     | <i>Cicer arietinum</i> Desi variety       | Northern India         |
| 23      | SBD377                       | <i>Cicer arietinum</i> Desi variety       | Northern India         |
| 24      | Pusa2024                     | <i>Cicer arietinum</i> Desi variety       | Northern India         |
| 25      | Pusa1103                     | <i>Cicer arietinum</i> Desi variety       | Northern India         |
| 26      | ICC14402                     | <i>Cicer arietinum</i> Desi landrace      | ICRISAT                |
| 27      | ICC5135                      | <i>Cicer arietinum</i> Desi landrace      | India                  |
| 28      | ICC13524                     | <i>Cicer arietinum</i> Desi landrace      | Iran                   |
| 29      | ICC13219                     | <i>Cicer arietinum</i> Desi landrace      | Iran                   |
| 30      | ICC13187                     | <i>Cicer arietinum</i> Desi landrace      | Iran                   |
| 31      | ICCV89314                    | <i>Cicer arietinum</i> Desi variety       | Eastern India          |
| 32      | ICCV96970                    | <i>Cicer arietinum</i> Desi variety       | Central India          |
| 33      | ICCV94954                    | <i>Cicer arietinum</i> Desi variety       | Central India          |
| 34      | ICCV10                       | <i>Cicer arietinum</i> Desi variety       | Southern/Central India |
| 35      | ICCV93958                    | <i>Cicer arietinum</i> Desi variety       | Southern India         |
| 36      | ICC4958                      | <i>Cicer arietinum</i> Desi landrace      | Central India          |
| 37      | ICC3512                      | <i>Cicer arietinum</i> Desi landrace      | Iran                   |
| 38      | ICC8950                      | <i>Cicer arietinum</i> Desi landrace      | India                  |
| 39      | ICC6263                      | <i>Cicer arietinum</i> Desi landrace      | Russia & CISs          |
| 40      | ICC283                       | <i>Cicer arietinum</i> Desi landrace      | India                  |
| 41      | ICC1431                      | <i>Cicer arietinum</i> Desi landrace      | India                  |

| Sl. No. | Genotypes with Accession No. | Cultivar types                                     | Geographical origin      |
|---------|------------------------------|----------------------------------------------------|--------------------------|
| 42      | ICC4918                      | <i>Cicer arietinum Desi</i> breeding line/cultivar | India                    |
| 43      | ICC1205                      | <i>Cicer arietinum Desi</i> landrace               | India                    |
| 44      | ICC1882                      | <i>Cicer arietinum Desi</i> landrace               | India                    |
| 45      | ICC1356                      | <i>Cicer arietinum Desi</i> landrace               | India                    |
| 46      | ICCX-810800                  | <i>Cicer arietinum Desi</i> variety                | Northern India           |
| 47      | ICCX-820065                  | <i>Cicer arietinum Desi</i> variety                | Western India            |
| 48      | ICCV90201                    | <i>Cicer arietinum Desi</i> variety                | Northern India           |
| 49      | ICC1392                      | <i>Cicer arietinum Desi</i> landrace               | India                    |
| 50      | ICC3362                      | <i>Cicer arietinum Desi</i> landrace               | Iran                     |
| 51      | ICC2969                      | <i>Cicer arietinum Desi</i> landrace               | Iran                     |
| 52      | ICC12037                     | <i>Cicer arietinum Desi</i> landrace               | Mexico                   |
| 53      | ICC1052                      | <i>Cicer arietinum Desi</i> landrace               | Pakistan                 |
| 54      | ICC11284                     | <i>Cicer arietinum Desi</i> landrace               | Russia & CISs            |
| 55      | ICCV2/ICC12968               | <i>Cicer arietinum Kabuli</i> variety              | Southern India           |
| 56      | ICCV92311                    | <i>Cicer arietinum Kabuli</i> variety              | Central India            |
| 57      | ICCV95311                    | <i>Cicer arietinum Kabuli</i> variety              | Southern India           |
| 58      | ICCV96329                    | <i>Cicer arietinum Kabuli</i> variety              | Southern India           |
| 59      | ICCV95334                    | <i>Cicer arietinum Kabuli</i> variety              | Central India            |
| 60      | IC411514                     | <i>Cicer arietinum Kabuli</i> variety              | Northern India           |
| 61      | Pusa5028                     | <i>Cicer arietinum Kabuli</i> variety              | Northern India           |
| 62      | IC449069                     | <i>Cicer arietinum Kabuli</i> variety              | Northern India           |
| 63      | Pusa5023                     | <i>Cicer arietinum Kabuli</i> variety              | Northern India           |
| 64      | Pusa2024                     | <i>Cicer arietinum Kabuli</i> variety              | Northern India           |
| 65      | IC 296376                    | <i>Cicer arietinum Kabuli</i> variety              | Northern India           |
| 66      | IC 244243                    | <i>Cicer arietinum Kabuli</i> variety              | Northern India           |
| 67      | ICC5003                      | <i>Cicer arietinum Kabuli</i> variety              | Northern India           |
| 68      | PhuleG0515                   | <i>Cicer arietinum Kabuli</i> variety              | Central India            |
| 69      | BGD1105                      | <i>Cicer arietinum Kabuli</i> genetic stock        | Northern India           |
| 70      | ICC8740                      | <i>Cicer arietinum Kabuli</i> landrace             | Afghanistan              |
| 71      | ICC16524                     | <i>Cicer arietinum Kabuli</i> landrace             | Pakistan                 |
| 72      | ICC13523                     | <i>Cicer arietinum Kabuli</i> landrace             | Iran                     |
| 73      | ICC12328                     | <i>Cicer arietinum Kabuli</i> landrace             | Cyprus                   |
| 74      | ICC7272                      | <i>Cicer arietinum Kabuli</i> landrace             | Algeria                  |
| 75      | ICC11764                     | <i>Cicer arietinum Kabuli</i> landrace             | Chile                    |
| 76      | ICC15697                     | <i>Cicer arietinum Kabuli</i> landrace             | Syrian Arab Republic     |
| 77      | ICC8261                      | <i>Cicer arietinum Kabuli</i> landrace             | Turkey                   |
| 78      | ICC15333                     | <i>Cicer arietinum Kabuli</i> landrace             | Iran                     |
| 79      | ICC10755                     | <i>Cicer arietinum Kabuli</i> landrace             | Turkey                   |
| 80      | ICC10885                     | <i>Cicer arietinum Kabuli</i> landrace             | Ethiopia                 |
| 81      | ICC9137                      | <i>Cicer arietinum Kabuli</i> landrace             | Iran                     |
| 82      | ICC15406                     | <i>Cicer arietinum Kabuli</i> landrace             | Morocco                  |
| 83      | ICC8151                      | <i>Cicer arietinum Kabuli</i> landrace             | United States of America |
| 84      | ICC14199                     | <i>Cicer arietinum Kabuli</i> landrace             | Mexico                   |
| 85      | ICC12824                     | <i>Cicer arietinum Desi</i> landrace               | Ethiopia                 |

| <b>Sl. No.</b> | <b>Genotypes with Accession No.</b> | <b>Cultivar types</b>                 | <b>Geographical origin</b> |
|----------------|-------------------------------------|---------------------------------------|----------------------------|
| 86             | ICC12537                            | <i>Cicer arietinum Desi</i> landrace  | Ethiopia                   |
| 87             | ICC9643                             | <i>Cicer arietinum Desi</i> landrace  | Afghanistan                |
| 88             | ICC8621                             | <i>Cicer arietinum Desi</i> landrace  | Ethiopia                   |
| 89             | ICC9895                             | <i>Cicer arietinum Desi</i> landrace  | Afghanistan                |
| 90             | ICCV95332                           | <i>Cicer arietinum Kabuli</i> variety | Central India              |
| 91             | ICCV95333                           | <i>Cicer arietinum Kabuli</i> variety | Central India              |
| 92             | ICCV92337                           | <i>Cicer arietinum Kabuli</i> variety | Central India              |
